# Supplementary material for: Gma-miR408 Enhances Soybean Cyst Nematode Susceptibility by Suppressing Reactive Oxygen Species Accumulation
Source: MDPI journal article supplement (doi:10.3390/ijms232214022), 2022-11-14
Supplement: s1 [file s1]

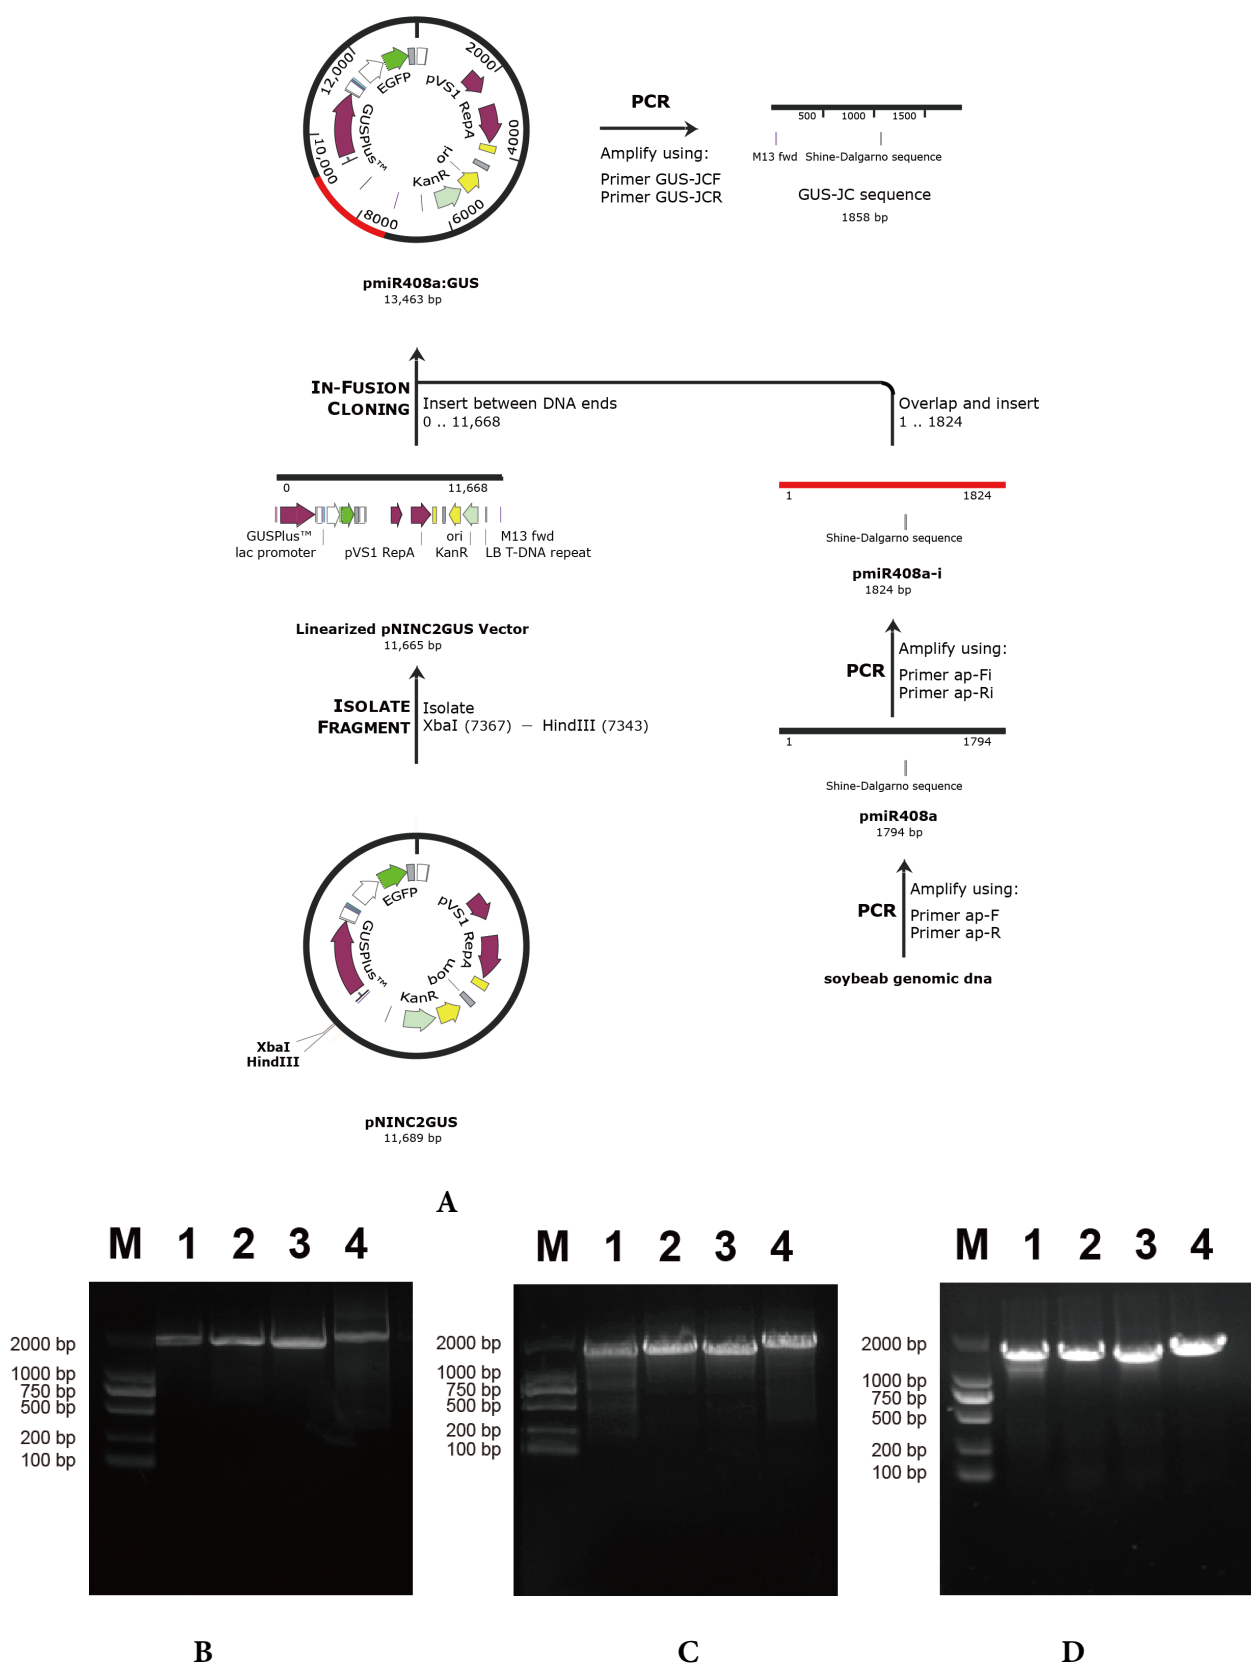

**Figure S1.** Construction of *pmiR408:GUS* vectors and validated by PCR. (A) Schematic diagram of *pmiR408:GUS* vectors construction (e.g., *miR408a*). (B) *pmiR408*. (C) *pmiR408-i*. (D) GUS-JC.

M: DNA marker, 1: *miR408a*, 2: *miR408b*, 3: *miR408c*, 4: *miR408d*.

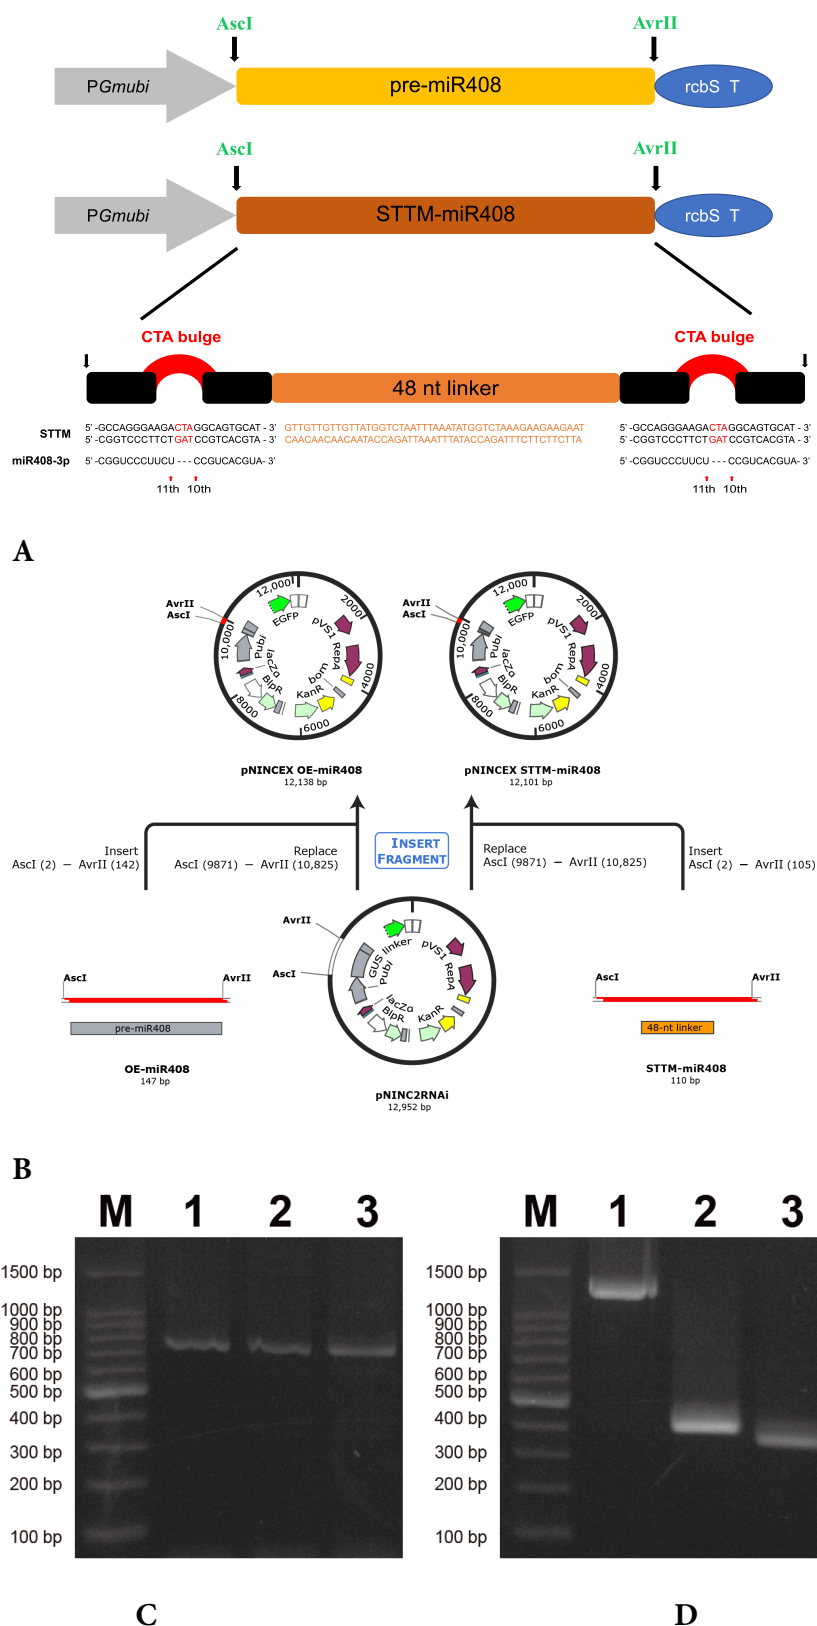

**Figure S2.** Construction of *gma-miR408* overexpression and silencing vectors and validated by PCR. (A) Diagram of the *gma-miR408* overexpression and STTM sequences construction. *PGmubi* represents the Ubiquitin promoter and *rcbS T* represents the *rcbS* terminator. (B) Schematic diagram of overexpression and silencing of *miR408* vector construction. (C) Positive validation of vectors transfer into *A. rhizogenes* K599 by EGFP. (D) Positive validation of vectors transfer into *A. rhizogenes* K599 by JC. M: DNA marker, 1: EV, 2: OE-miR408, 3: STTM-miR408.

Enzymes related to differentially expressed genes in the pathway diagram are marked with different colors. The enzymes marked in red boxes are related to up-regulated genes, and the enzymes marked in green boxes are related to down-regulated genes. Enzymes marked by blue boxes are associated with both up and down-regulated genes. The upper box represents EV vs OE, and the lower box represents EV vs STTM.

Enzymes related to differentially expressed genes in the pathway diagram are marked with different colors. The enzymes marked in red boxes are related to up-regulated genes, and the enzymes marked in green boxes are related to down-regulated genes. Enzymes marked by blue boxes are associated with both up and down-regulated genes. The upper box represents EV vs OE, and the lower box represents EV vs STTM.
