# Supplementary material for: Gma-miR408 Enhances Soybean Cyst Nematode Susceptibility by Suppressing Reactive Oxygen Species Accumulation
Source: Int J Mol Sci. 2022 Nov 14;23(22):14022. doi: 10.3390/ijms232214022 (PMC9695887; doi:10.3390/ijms232214022)
Supplement: Supplementary file 1 [file ijms-23-14022-s001.zip]

Archive with 10 entries (10 files):
- supplement figures.pdf
- Table.S1.xlsx
- Table.S2.xlsx
- Table.S3.xlsx
- Table.S4.xlsx
- Table.S5.xlsx
- Table.S6.xlsx
- Table.S7.xlsx
- Table.S8.xlsx
- Table.S9.xlsx
