# Supplementary material for: Gma-miR408 Enhances Soybean Cyst Nematode Susceptibility by Suppressing Reactive Oxygen Species Accumulation
Source: Int J Mol Sci. 2022 Nov 14;23(22):14022. doi: 10.3390/ijms232214022 (PMC9695887; doi:10.3390/ijms232214022)
Supplement: Supplementary file 1 [file ijms-23-14022-s001.zip › Table.S1.xlsx]

## Sheet: Sheet2
Table. S1 Phylogenetic analyses of 182 precursors sequence from 118 species.
No	miRNA_ID	Species	miRNA-5p	miRNA-3p	precursor	Strand	Location
1	Ppa-miR408	Physcomitrella_patens	CCAGCGUGAGGCAAUGCAUG	UGCACUGCCUCUUCCCUGGCU	AGGGAGGGAAGCCAGCGUGAGGCAAUGCAUGACAACAGCAUGCCCAGGAGGUCCUGAGGGUGUUGUCCUCAUGCACUGCCUCUUCCCUGGCUUCCCUACAUA	+	Chr17:9264198-9264299
2	Mpo-miR408a	Marchantia_polymorpha	CUGGGGUGCGGCAGCGCAUG	UGCACUGCCUCUUCCCUGGCU	GGGUCAGAGAGCUGGGGUGCGGCAGCGCAUGAUUAGGACAGGAGCAGGAGGCCUGCUUCUGCCAUUUUCAUGCACUGCCUCUUCCCUGGCUCCUUCAUUCA	-	scaffold_95:205026-205126
3	Mpo-miR408b	Marchantia_polymorpha	CUGGGGUGCGGCAGCGCAUG	UGCACUGCCUCUUCCCUGGCU	GGGUCAUAGAGCUGGGGUGCGGCAGCGCAUGUUUAGGACAGGAGCAGAAGGCCUGCUUCUGCCGUUUUCAUGCACUGCCUCUUCCCUGGCUCCUUCACUCC	-	scaffold_95:208861-208961
4	Smo-miR408a	Selaginella_moellendorffii	GCUAGGGAGAGACAUUGCAUG	UGCACUGCCUCUUCCCUGGCUG	GGAUUUAGCAGUAGCUAGGGAGAGACAUUGCAUGAUAGCUACACCAAAGAGCAAGCUCGGCUCCUUGUGUGGCUUUGAUGCACUGCCUCUUCCCUGGCUGCGGCCAAGUU	+	scaffold_47:116998-117107
5	Smo-miR408b	Selaginella_moellendorffii	GCUAGGGAGAGACAUUGCAUG	UGCACUGCCUCUUCCCUGGCUG	GGAUUUAGUAGUAGCUAGGGAGAGACAUUGCAUGAUAGCUACACCAAAGAGCAACCUCGGCUCCUUGUGUGGCUUUGAUGCACUGCCUCUUCCCUGGCUGCGGCCAAGUU	+	scaffold_54:92095-92204
6	Gbi-miR408	Ginkgo_biloba	CAGGAAAGAGGUAGUGCAUGG	AUGCACUGCCUCUUCCCUGGC	GCAGUUAAUGGAGAGCAGAGAGAUGGGUAGGCAGGAAAGAGGUAGUGCAUGGAAGUUGCAGAACCAGAAACGUCUGCUUCUGCCAUUCUCAUGCACUGCCUCUUCCCUGGCUUCCAAACUG	+	scaffold1052:342619-342739
7	Pab-miR408	Picea_abies	ACAGGGAAGAGUUAGGGCAUG	UGCACUGCCUCUUCCCUGGCU	GGCACAGAGAGACAGGGAAGAGUUAGGGCAUGGGAAUUGCACAGGCAGAAACGUCUGCUUCUGCCAUUCUCAUGCACUGCCUCUUCCCUGGCUCACUUCUUCU	-	MA_101556:25859-25961
8	Pta-miR408	Pinus taeda		AUGCACUGCCUCUUCCCUGGC	GAGACAGGGACGAGUUAGGGCAUGGGAGUUGCAUAUGCAGAAACGUCUGCUUCUGCCAUUCUUAUGCACUGCCUCUUCCCUGGCUC		contig TC64032
9	Atr-miR408	Amborella_trichopoda	GCAGGGAUGAAGCUGAGCAUGG	UGCACUGCCUCUUCCCUGGCU	UUUGAGAGCAGGCAGGGAUGAAGCUGAGCAUGGGAGGGUCAUGACCAAACUCAUCUUGCUGCUCUUGUCCUUCUCAUGCACUGCCUCUUCCCUGGCUCUCCUUUAUC	-	AmUr_v1.0_scaffold00045:1152320-1152426
10	Pam-miR408	Persea_americana	CAGGGAAAAGGUAGAGCAUGG	UGCACUGCCUCUUCCCUGGCUC	GAAUAAAAAGGCAGGGAAAAGGUAGAGCAUGGGAGAGGUCAUCAACACAAAAGGCCUGUUGUUGCCCGUCCCCUGCACUGCCUCUUCCCUGGCUCUCUCUCUCUC	+	lcl|Scf00146:315587-315691
11	Spo-miR408	Spirodela_polyrhiza	ACAGGGAAGCGGUAGAGCAUG	UGCACUGCCUCUUCCCUGGCU	AGGCGACGUAGACAGGGAAGCGGUAGAGCAUGGGAAGGGUUCAUCAGCAACGCGUGGUUGCUGCUGUCCUUCCCCUGCACUGCCUCUUCCCUGGCUCCUCACAAAC	-	pseudo27:1398299-1398404
12	Aof-miR408	Asparagus_officinalis	ACGGGGAUGAGGCGGAGCAUG	UGCACUGCCUCUUCCCUGGCU	GAAGAAGCAAGACGGGGAUGAGGCGGAGCAUGAGAGGGGUCAAUAACAAAUAACAAAUACAGGAAGGCGAAGGCGAAGCCGGCAUUGAAGAUAUUGGCAUUGAGAGUUGUUGUUGCCCUUUUCAUGCACUGCCUCUUCCCUGGCUUCCAUCACCC	-	AsparagusV1_07:36121006-36121160
13	Deca-miR408	Dendrobium_catenatum	GCAGGGAUGAGGCAGAGCAUG	UGCACUGCCUCUUCCCUGGCU	AAAGCAUCAAGGCAGGGAUGAGGCAGAGCAUGAGAUGGGGUCAUCAACACACCAAUGUAGAGAUAGAGAGAGAGAUGUAGAGAGAGAAAGAUAGAGGCUGAUUGCUUGUGAAAGUUUGUUGUUGCCUUUCCCAUGCACUGCCUCUUCCCUGGCUUUCUCUUCUC	-	KZ502877.1:1138813-1138976
14	Dof-miR408	Dendrobium_officinale	GCAGGGAUGAGGCAGAGCAUG	UGCACUGCCUCUUCCCUGGCU	AAAGCAUCAAGGCAGGGAUGAGGCAGAGCAUGAGAUGGGGUCAUCAACACACCAAUGUAGAGAUAGAGAGAGAGAUGUAGAGAGAGAAAGAUAGAGGCUGAUUGCUUGUGAAAGUUUGUUGUUGCCUUUCCCAUGCACUGCCUCUUCCCUGGCUUUCUCUUCUC	-	NW_018279477.1:151666-151829
15	Mac-miR408	Musa_acuminata	ACGGGGACGAGGUAGAGCAUG	UGCACUGCCUCUUCCCUGGCU	GCGGGCGCAAGACGGGGACGAGGUAGAGCAUGGGAUGGGGUCAGAAACAGAGUCGUCGUGUUUCUGCCCUUUCCAUGCACUGCCUCUUCCCUGGCUCUCUUCCCCU	+	chr08:4102072-4102177
16	Cnu-miR408	Cocos_nucifera	GCAGGGACAAGGCAGAGCAUG	UGCACUGCCUCUUCCCUGGCU	GAGGCAAUAAGGCAGGGACAAGGCAGAGCAUGGGAUGGGUUCAUCAACGUGACGAAACCCCAAGGAAGAAACUUUUGAAGGCGAGGAGAAGAUAGGAUUGUUGCUGUCCCUUCCCAUGCACUGCCUCUUCCCUGGCUCACCCUUCAC	+	scaffold30:1981970-1982116
17	Egu-miR408	Elaeis_guineensis	CAGGGAUAAGGCAGAGCAUGG	AUGCACUGCCUCUUCCCUGGC	GGCAUUAAGGCAGGGAUAAGGCAGAGCAUGGGAUGGGGUCAUCAACGUGACGAAAUCCCAAGGAAGAAACUUUGGAAGGCGAGGAGAAGAUAGGGUGGAUUGUUGCUGUCCCUUCCCAUGCACUGCCUCUUCCCUGGCUCUCCCU	+	NW_011550926.1:2136428-2136572
18	Aco-miR408	Ananas_comosus	ACGGGGACGAGGUCGGGCAUG	UGCACUGCCUCUUCCCUGGC	GAAUUGAGCAGACGGGGACGAGGUCGGGCAUGCGAGGGGUUCAGUCCGCAUAGAAAAAGAUUCCCUAUGCGGGUGCCCUUCCCAUGCACUGCCUCUUCCCUGGCUCCUCUCGAU	+	LG12:122544-122657
19	Vca-miR408	Vriesea carinata	ACGGGGACGAGGUCGGGCAUG	UGCACUGCCUCUUCCCUGGCU	AAGGAGACGGGGACGAGGUCGGGCAUGCGAGGGGUUGAGUCCGCAUAGAAAAAGAUUCCCUAUGCGGGUGCCCUUCCCAUGCACUGCCUCUUCCCUGGCUCCUU		contig 74327
20	Ata-miR408	Aegilops tauschii	CAGGGAUGGAGCAGAGCAAGG	UGCACUGCCUCUUCCCUGCC	AGGGCAGAGGAGACAGGGAUGGAGCAGAGCAAGGGAUGGGGCAAACAACAAACUUCAACUGCUUCCUUCCACUGAUCACCUCCUGAUUAUAUGACAAGAGCGAGAGAGUUGUGAGAGAUGAGAGCUUUUGUUAUUGUUGUUGUUGUUGCUCCCUCCCUGCACUGCCUCUUCCCUGCCUCCCCUCCCA	-	chr7: 421297003-421297189
21	Bdi-miR408	Brachypodium distachyon	CAGGGAUGGAGCAGAGCAUGG	CUGCACUGCCUCUUCCCUGGC	GGGGAGGAGACAGGGAUGGAGCAGAGCAUGGGAUGGGGCUAACAGCAAAAUUACGUUCGUUAUUACUUCCACUAUAUGCUGUGAGAGCUGCUGCUGCUGUGUUGUUGCUCCCUCCCCUGCACUGCCUCUUCCCUGGCUCCCCUGC	+	2: 10450366-10450510
22	Cam-miR408	Cenchrus_americanus	CAGGGAUGAGGCAGAGCAUGG	CUGCACUGCCUCUUCCCUGGC	GGGUGGUUUGGUUUGGGAGGCAGGGAUGAGGCAGAGCAUGGGAUGGGGCCAUCAACAGACAAAAAAAAUCUUCCGUUUCCUUGCCCACGAGCACGAGAAGGUUUGAGGCACCACACAAAGAUCGAGAGCUCCGCCCCCGCGCUGGUGUUGUUGCUCCCUCCCCUGCACUGCCUCUUCCCUGGCUCCCCCCACC	-	chr6:182343359-182343551
23	Oni-miR408c	Oryza_nivara	CAGUGAUGAGGCAGAGCAUA	UGCUAAUGCUUCAUCACCUGGC	AUUUGAACACCAGUGAUGAGGCAGAGCAUAUGGAACCGACCGAUGGAAAUGUAUCUAGCGAUGGAGCUUUCUUCUCGUUGAAUAAUGACAAGGUCAAUUCAAAGGGAAGUGCUAAUGCUUCAUCACCUGGCUGCCUGCAU	-	6:12275507-12275646
24	Osa-miR408a	Oryza sativa	ACAGGGAUGAGGCAGAGCAUG	CUGCACUGCCUCUUCCCUGGC	GAGGAGAGGAGACAGGGAUGAGGCAGAGCAUGGGAUGGGGCUAUCAACAGAUGUAGAUUAUUCCUUGCACAAGAGAUGAUGAUGAGCUGUGAAUGAGUUCUGAGAGAUGGCUGGUGUUGUUGUUGCUCCCUCCCCUGCACUGCCUCUUCCCUGGCUCCCCUGCAC	+	Chr1:12301679-12301843
25	Osa-miR408b	Oryza sativa	CAGUGAUGAGGCAGAGCAUA	UGCUAAUGCUUCAUCACCUGGC	AUUUGAACACCAGUGAUGAGGCAGAGCAUAUGGAACCGACCGAUGGAAAUGUAUCUAGCGAUGGAGCUUUCUUCUCGUUGAAUAAUGACAAGGUCAAUUCAAAGGGAAGUGCUAAUGCUUCAUCACCUGGCUGCCUGCAU	-	Chr6:3604065-3604204
26	Ogl-miR408	Oryza_glaberrima	CAGGGAUGAGGCAGAGCAUG	CUGCACUGCCUCUUCCCUGGC	AGGAGAGGAGACAGGGAUGAGGCAGAGCAUGGGAUGGGGCUAUCAACAGAUGUAGAUUAUUCCUUGCACAAGAGAUGAUGAGCUGUGAAUGAGUUCUGAGAGAUGGCUGGUGUUGUUGUUGCUCCCUCCCCUGCACUGCCUCUUCCCUGGCUCCCCUGCAC	+	1:8988117-8988277
27	Oni-miR408a	Oryza_nivara	CAGGGAUGAGGCAGAGCAUG	CUGCACUGCCUCUUCCCUGGC	AGGAGAGGAGACAGGGAUGAGGCAGAGCAUGGGAUGGGGCUAUCAACAGAUGUAGAUUAUUCCUUGCACAAGAGAUGAUGAUGAGCUGUGAAUGAGUUCUGAGAGAUGGCUGGUGUUGUUGUUGCUCCCUCCCCUGCACUGCCUCUUCCCUGGCUCCCCUGCAC	+	1:13401965-13402128
28	Oni-miR408b	Oryza_nivara	CAGAGGAUGAGGUGGUGAGUC	CUGCACUGCCUCGUGCCUGGC	CUUCUUGUAGGCCAGAGGAUGAGGUGGUGAGUCAUGGCUACCCCAACCUCGAGCUCCGCUUCCUAUCGCUACCAGCAUUGACCCUUAAGGAGAGCUCGAGAUAUAUCUCUGAUCACUUGGAUCUGACGUCAUUGGCACAUCGGCUCCUAUCCCACCCUCCUCGCCAUCUCGAUUCAUCACCAGCGUGGGGGGGGGAGAGCCAUCUCUACUCACAAAGCUCUGUGCCCCUCGUCCGUGGCAAGCUCCUCUGCACUGCCUCGUGCCUGGCCGGUCUCCAA	-	1:18739288-18739565
29	Oru-miR408	Oryza_rufipogon	CAGGGAUGAGGCAGAGCAUGG	CUGCACUGCCUCUUCCCUGGC	AGGAGAGGAGACAGGGAUGAGGCAGAGCAUGGGAUGGGGCUAUCAACAGAUGUAGAUUAUUCCUUGCACAAGAGAUGAUGAUGAGCUGUGAAUGAGUUCUGAGAGAUGGCUGGUGUUGUUGUUGCUCCCUCCCCUGCACUGCCUCUUCCCUGGCUCCCCUGCAC	+	1:11386816-11386979
30	Phe-miR408	Phyllostachys_heterocycla	UCAGGGACGAGGCAGAGCAUG	UGCACUGCCUCUUCCCUGGCU	GGGUGAGGAGUCAGGGACGAGGCAGAGCAUGGGAUGGGGCUAUCAACAAAUUUCUUUCUUCCACUACAUAUUUGUUUCUGUGGCAGACGCAAAGCAAACUGUUAGGCAGGAGAGAGUUUUGAUGAGAGAGAUGAGCUGGUGUUGUUGUUCCCUCCCGUGCACUGCCUCUUCCCUGGCUCCCCUGCAUCACCCC	+	PH01000504:464831-465023
31	sof-miR408a	Saccharum officinarum		CUGCACUGCCUCUUCCCUGGC	AGAAGAUGGGUAUGGUUGGAGACAGGGAUGAGGCAGAGCAUGGGAUGAGGCCAUCAACAAAAUUUCCAAUUUCUGUCCUCCGCUAGGCCGCUACUGCAUUUCUGUUUGCUUGCUCACAAAACGGAGGGAUUUGUGAGAGUUAUCAGGCAGAAAGAACAAAGAAGGUGCCUCCCUGGUGAAGUGGUGAUGGCCUGACCUGAGACGGCUGAGAGCUCAGCUGGUGUCCUGUUGUUGCUUCCUCCCCUGCACUGCCUCUUCCCUGGCUCCCCACCGUUGCCCUUGC		gi|36056519|gb|CA294315.1|
32	sof-miIR408b	Saccharum officinarum		CUGCACUGCCUCUUCCCUGGC	AGAAGAUGGGUAUGGUUGGAGACAGGGAUGAGGCAGAGCAUGGGAUGGGGCCAUCAACAAAAUUUCCAAUUUCUGUCCUCCGCUAGGCCGCUACUGCAUUUAUGUUUGCUUGCUCACAAAACGGAGGGAUUUGUGAGAGUUAUCAGGCAGAAAGAACAAAGAAGGUGCCUCCCUGGUGAAGUGGUGAUGGCCUGACCUGAGAGGGCUGAGAGCUCAGCUGGUGUCCUGGUGUUGUUGCUUCCUCCCCUGCACUGCCUCUUCCCUGGCUCCCCACCGUUGCCCUUGC		gi|35266807|gb|CA216984.1|
33	sof-miR408c	Saccharum officinarum		CUGCACUGCCUCUUCCCUGGC	AGAAGAUGGGUAUGGUUGGAGACAGGGAUGAGGCAGAGCAUGGGAUGGGGCCAUCAACAAAAUUUCCAAUUUCUGUCCUCCGCUAGGCCGCUACUGCAUUUCUGUUUGCUUGCUCACAAAACGGAGGGAUUUGUGAGAGUUAUCAGGCAGAAAGAACAAAGAAGGUGCCUCCCUGGUGAAGUGGUGAUGGCCUGACCUGAGAGGGCUGAGAGCUCAGCUGGUGUCCUGGUGUUGUUGCUUCCUCCCCUGCACUGCCUCUUCCCUGGCUCCCCACCGUUGCCCUUGC		gi|34946992|gb|CA093685.1|
34	sof-miR408d	Saccharum officinarum		CUGCACUGCCUCUUCCCUGGC	GGAAGGUAUGUUUGAUUGGAGACAGGGACGAGGCAGAGCAUGGGAUGGGGCCAUCAACAAAAUUUCCAAUUUCCGUUUGCUUGCUCACAAAACGAAGGUGCCUGCCUCCCUGGUGAUGGCCUGACCUGAGAGGGCUGAGAGCUCAGCUGGUGUCCUGGUGUUGUUGCUUCCACCCCUGCACUGCCUCUUCCCUGGCUCCCCACCGUUGCCCUUGC		gi|34948184|gb|CA094877.1|
35	sof-miIR408e	Saccharum officinarum		CUGCACUGACUCUUCCCUGGC	AGAAGAUGGGUAUGGUUGGAGACAGGGAUGAGGCAGAGCAUGGGAUGAGGCCAUCAACAAAAUUUCCAAUUUCUGUCCUCCGCUAGGCCGCUACUGCAUUUAUGUUUGCUUGCUCACAAAACGGAGGGAUUUGUGAGAGUUAUCAGGCAGAAAGAACAAAGAAGGUGCCUCCCUGGUGAAGUGGUGAUGGCCUGACCUGAGACGGAUGAGAGCUCAGCUGGUGUCCUGUUGUUGCUUACUUCCCUGCACUGACUCUUCCCUGGCUCCCCACCGUUGCCCUUGC		gi|34916972|gb|CA065448.1|
36	Sit-miR408	Setaria_italica	CAGGGAUGAGGCAGAGCAUGG	CUGCACUGCCUCUUCCCUGGC	GGUGGUUUGGAUUGGAGGCAGGGAUGAGGCAGAGCAUGGGAUGGGGCCAUCAACAGACAAAACUCCGUUUCUUCCACUGCAAAAACAUGUUUGUGAGAGGUUUUGAGGCAAAAAAAAAAAAAAGGUUGAGAGCUCCGCCCCCACCGGUGUUGUUGCUCCCUCCCCUGCACUGCCUCUUCCCUGGCUCCCUGCCGC	+	V:13900001-13900195
37	Sbi-miR408	Sorghum_bicolor	ACAGGGACGAGGCAGAGCAUG	UGCACUGCCUCUUCCCUGGCU	UUUGAUUGGAGACAGGGACGAGGCAGAGCAUGGGAUGGGGCCAUCAACAACAAAAUUUCCAAUUUCCGUUUGCUUGCCCACAAAAUGGAGGGACUUGUCAGGAGAGGUAUCAGGCAGAGAGAAGGUGCCUCCCUGGUGAAAUGGUGAUGGCCUGAGAGAGCUCAGCUGGUGUCCUGGUGUUGUUGCUUCCUCCCCUGCACUGCCUCUUCCCUGGCUCCCCACCGUC	+	Chr03:15908442-15908667
38	Tae-miR408a	Triticum_aestivum	CAGGGAUGGAGCAGAGCAAGG	UUGUUGUUGCUCCCUCCCUGCA	GGAGAGGAGACAGGGAUGGAGCAGAGCAAGGGAUGGGGCAAGCAACAAACUUCACUUCCUUCCACUGAUCACCACCUGAUUAUGACAAGAGCGAGAGAGUUGUGAGAGAUGAGAGGUUCCGACUGUUGUUGUUGCUCCCUCCCUGCACUGCCUCUUCC	-	7A:663758938-663759095
39	Tae-miR408b	Triticum_aestivum	CAGGGAUGGAGCAGAGCAAA	UGCACUGCCUCUUCCCUGGC	GGGAGAGGAGACAGGGAUGGAGCAGAGCAAAGGAUGGGGCAAGCAACAAACUUCACUUCCUUCCACUCAUCACCUCCUGAUUGUCAGAGGAGCAAGAGAGUUGUGAGAGACCAGCUGAGAGCUUCUGUUGCUGUUGUUGCUCCCUCCCUGCACUGCCUCUUCCCUGGCUCCCCUCCCA	-	7B:632803701-632803878
40	Tae-miR408c	Triticum_aestivum	CAGGGAUGGAGCAGAGCAAGG	UGCACUGCCUCUUCCCUGGC	GGGGGAGGAGACAGGGAUGGAGCAGAGCAAGGGAUGAGGCAAGCAACAAAAUUUACCACCUGAUUAUGAGAAGAGGGAGAGAGUUGCCAGAGCUUCUGUUGCUGUUGUUGCUCCCUCCCUGCACUGCCUCUUCCCUGGCUCCCCUCCCA	+	7B:632998426-632998574
41	Tae-miR408d	Triticum_aestivum	CAGGGAUGGAGCAGAGCAAGG	UGCACUGCCUCUUCCCUGUA	GCAGAGGAGACAGGGAUGGAGCAGAGCAAGGGAUGGGGCAAACAACAAACUUCAACUGCUUCCUUCCACUGAUCACCUCCUGAUUAUAUGACAAGAGCGAGAGAGUUGUGAGAGAUGAGAGCUUCUGUUAUUGUUGUUGUUGUUGCUCCCUCCCUGCACUGCCUCUUCCCUGUA	+	7D:573967497-573967670
42	Tae-miR408e	Triticum_aestivum	CAGGGAUGGAGCAGAGCAAGG	UGCACUGCCUCUUCCCUGGC	GGGAGAGGAGACAGGGAUGGAGCAGAGCAAGGGAUGGGGCAAGCAACAAACCUCACUUCCUUCCACUCAGCAUCACCUGAUUAGUAUGGUUUAUGAGAAGAGCGAGAGAGUUGUGAGAGAUGGGAGCUUCUGUAGUAGUUGUUGUUGCUCCCUCCCUGCACUGCCUCUUCCCUGGCUCCCCUCCGA	+	7D:574066697-574066882
43	Tur-miR408	Triticum_urartu	CAGGGAUGGAGCAGAGCAAG	UGCACUGCCUCUUCCCUGGC	AGGGGAGAGGAGACAGGGAUGGAGCAGAGCAAGGGAUGGGGCAAGCAACAAACUUCACUUCCUUUCACUGAUCACCACCUGAUUAUGACAAGAGCGAGAGAGUUGUGAGAGAUGAGAGGUUCCGACUGUUGUUGUUGCUCCCUCCCUGCACUGCCUCUUCCCUGGCUCCCCUCCCC	-	scaffold17068:74757-74932
44	Zma-miR408a	Zea mays	CAGGGAUGAGACAGAGCAUGG	CUGCACUGCCUCUUCCCUGGC	UGGGGGUUGGUUUUGAUUUGGAGACAGGGAUGAGACAGAGCAUGGGAUGGGGCCAUCAACAAAGUGGAGGGACUAGCUUGCGAGGCAGAAAGAAGGUGCCAGUGCCGGUGCCUCCCCGGUGAAACGAUGAUGGGAGUGUUGUUGCUCCCUCCCCUGCACUGCCUCUUCCCUGGCUCCGAUCCCC	-	3:58127899-58128082
45	Zma-miR408b	Zea mays	AGGGCUGAGGCAGAGCAUGGG	CGUGCAGCCACAGCAGCCUCU	GCUAUAGCUGAGGGCUGAGGCAGAGCAUGGGCGCCCCGCGACUGCGUGCGAGGGACAGUGUCGUCACGUCUCCACUUGUUCGUCCCUGACCCCCCGAGGCCCGAGCAGAGAGGGCCACACCACAGCCUACAGGACAGGAACCAGGAUAAGCGACUGCGACUUGACGCGAACCGUGCAGCCACAGCAGCCUCUGCGACCAGGUCGCGGCGUGGGCA	+	5:195580000-195580214
46	Zma-miR408c	Zea mays	CAGGGACGAGGCAGAGCAUG	UGCACUGCCUCUUCCCUGGC	UUGAUCGGAGACAGGGACGAGGCAGAGCAUGGGUAGGGGGCCAUCAACAGAAUUCCAAAUUUGAUUUCUGUUUGCUCGCUCACAAAAUGGAGGGACUCACCACAAACACACUCAGGCGUUGUUGCUCCCUCCCCUGCACUGCCUCUUCCCUGGCUCCUCACCGU	-	8:39583930-39584093
47	Aca-miR408	Aquilgia coerulea		UGCUCUGCCUCAUCCUUGUCU	AGCCAGGGAAGAGGCAGUGCAUGGAAAGAGCAACAACAAUAUUUGUGUUGAUUGGUUCAUUCCAUGCUCUGCCUCAUCCUUGUCUGU		2185474487
48	Nnu-miR408a	Nelumbo_nucifera	CAGGGAUAAGGCAGAGCAUGG	AUGCACUGCCUCUUCCCUGGC	AGAGAGAGAGAUAGGCAGGGAUAAGGCAGAGCAUGGGAUGGAGCAAUCAACAGAGGGGUGGAGCUGUUGUUGCUCUUCCCAUGCACUGCCUCUUCCCUGGCUCUCUCUUUC	-	NW_010729077.1:5253720-5253830
49	Nnu-miR408b	Nelumbo_nucifera	ACAGGGAUAAGACAGAGCAUG	AUGCACUGCCUCUUCCCUGGC	CAGAUAGACAGACAGGGAUAAGACAGAGCAUGGGAUGGACCAUUCAACAGAGGCAUGGAGCUGUUGUUGCUCUUCCCAUGCACUGCCUCUUCCCUGGCUCUCUCUCUC	+	NW_010729089.1:4866977-4867084
50	Cqu-miR408a	Chenopodium_quinoa	GCUAGGGAAGCGGUUGGGCAUG	UGCACUGCCUCUUCCCUGGCU	AUGGGAGAGCUAGAAGCUAGGGAAGCGGUUGGGCAUGAGAUGGAUCAAUCAACAUUGUAGAUAUUGAUGUUGUUGCUCUUCCCAUGCACUGCCUCUUCCCUGGCUCUUCUUUAUC	+	Cqu_c00907.1:125853-125967
51	Cqu-miR408b	Chenopodium_quinoa	ACGGGAAAGAGGUUGCGCAAA	UGCACUGCCUCUUCCCUGGCU	AGAGAUAUCAAAUGAAAGACGGGAAAGAGGUUGCGCAAAGAUAGAGCUACUUAACAAGUUGAUCAUUUAUGUUGUUGGCUCUACCUUUGCACUGCCUCUUCCCUGGCUUUCAUUUCUC	-	Cqu_c01423.1:128896-129013
52	Cqu-miR408c	Chenopodium_quinoa	ACGGGAAAGAGGUUGCGCAAA	UGCACUGCCUCUUCCCUGGCU	GGAGAUAUAUCAAAUGAAAGACGGGAAAGAGGUUGCGCAAAGAUAGAGCUACUUAACAAGUUGAUCAUUUAUGUUGUUGGCUCUACCUUUGCACUGCCUCUUCCCUGGCUUUCAUUUCUC	-	Cqu_c16313.1:4331-4450
53	Bvu-miR408	Beta_vulgaris	CCGGAGAAGAAGUAGUGCAAG	UGCACUGCCUCUUCCCUGGCU	AGAGAUUGGAUAAAGCCGGAGAAGAAGUAGUGCAAGGAUAGAGCUGCUUGCAAACUACAUUUUCAUGUGUUUUGGCUCUACCCUUGCACUGCCUCUUCCCUGGCUAUUAUGUCUC	-	Bvchr9.sca025:3397153-3397267
54	Fes-miR408	Fagopyrum_esculentum	CGGGGAUGAGACUGAGCAAGG	UUGCACUGCCUCUUCCCUGGC	UGUUACGAAGACGGGGAUGAGACUGAGCAAGGAUGGAGCGUAUUAACAGAUCAUAGAAUGCUGUUGUAGCUCUACCCUUGCACUGCCUCUUCCCUGGCUUUGUGUCUU	+	QWEW01006762.1:340003-340110
55	Ach-miR408a	Actinidia_chinensis	GACGGGGACGAGGGAGAGCAUG	UGCACUGCCUCUUCCCUGGCUG	UGAAGAGGACAGACGGGGACGAGGGAGAGCAUGAGAUGAGGCUUUAAUCAUCACAAACACUAGUGUUGUUUCUCUUCCCCUGCACUGCCUCUUCCCUGGCUGUCCUCUCUCU	+	Chr6:12152568-12152679
56	Ach-miR408b	Actinidia_chinensis	GACGGGGACGAGGGAGAGCAUG	UGCACUGCCUCUUCCCUGGCUG	UGAAGAGGACAGACGGGGACGAGGGAGAGCAUGAGAUGAGGCUUUAAUCAUCACAAACACUAGUGUUGUUUCUCUUCCCCUGCACUGCCUCUUCCCUGGCUGUCCUCUCUCU	+	Chr9:8972462-8972573
57	Ach-miR408c	Actinidia_chinensis	ACGGGGACGAGGCAGAGCAUG	UGCACUGCCUCUUCCCUGGCU	UGGAAGAGGACAGACGGGGACGAGGCAGAGCAUGAGAUGAGGCUUUAAUCAUCACAAACACUUGUGCUGUUUCUCUUCCCCUGCACUGCCUCUUCCCUGGCUCUCCUCUCUC	-	Unknow:103718959-103719070
58	Csi-miR408a	Camellia_sinensis	UCGGGGACGAGACAGAGCAUG	UGCACUGCCUCUUCCCUGGCU	AGAGGGAGGAUAGUCGGGGACGAGACAGAGCAUGAGAUGAGAUUUUCAUCAACACAUUUUUGACUGAUAAAAUAUGUCGGUGCUCUUCUCUUGCACUGCCUCUUCCCUGGCUUUCCUCUCUC	+	Sc0000321:398966-399087
59	Csi-miR408b	Camellia_sinensis	ACGGGGACGAGACAGAGCAUG	UGCACUGCCUCUUCCCUGGCU	GAAGAGGGGAGACGGGGACGAGACAGAGCAUGAGAUGGGAUUUUAAUUAACACAUAGAAGUUGUGUUGUUAUUCUUCUCUUGCACUGCCUCUUCCCUGGCUCUCCUCUCUC	-	Sc0000427:652562-652672
60	Daca-miR408	Daucus carota	ACGGGGACGAGGCGGAGCCUG	UGCACUGCCUCUUCCCUGGCU	CGGAGTTTGGGTTTTCCGAAGGTAAATGACGGAAGAGGATAGACGGGGACGAGGCGGAGCCTGAAATGGATGGTTGAACACCTACATTATGGTGTGACTATTCTTTCCATGCACTGCCTCTTCCCTGGCTACCCACTCCA	+	DCARv2_Chr1:21935177-21935316
61	Pno-miR408	Panax_notoginseng	ACAGGGACGAGACGGAGCAUG	UGCACUGCCUCUUCCCUGGCU	AGAGAGGAAAGACAGGGACGAGACGGAGCAUGAGAUGGACCAUUCAACACUUGUAUUCUGGUGUUGCUGCCCAUUCUAUGCACUGCCUCUUCCCUGGCUUCUCUCUCUC	+	scaffold8083:29209-29317
62	Cyca-miR408	Cynara cardunculus		UGCACUGCCUCUUCCCUGGCU	UGUGAGGCUAGACGGGGACGAGACAGAGCCCGAAAAAGCCUAGUCAAUACUUGGGUAUGUAUUGUUAUCUUUUUCAUGCACUGCCUCUUCCCUGGCUAUCAUCUUUC		GE605886.1:22-128
63	Han-miR408	Helianthus_annuus	ACAGGGACGAGCCAGAGCUCG	UGCACUGUCUCUUCCCUGGCU	UGUGAGGGUAGACAGGGACGAGCCAGAGCUCGAAAAAGACAAGUCAAUACUUGAGUCAGUAUUUUCUUUUUCAUGCACUGUCUCUUCCCUGGCUAUCCUUUUUC	+	1:93477959-93478062
64	Lsa-miR408	Lactuca_sativa	ACAGGGACGAGACGGAGCCCG	UGCACUGCCUCUUCCCUGGCU	AUGUGAGGGUAGACAGGGACGAGACGGAGCCCGAAAAAGACUGAUGGAUACUUAAUACAGUAUUAUAGUUUUUUUCGUGCACUGCCUCUUCCCUGGCUAUCCUUUGUU	+	NBSK01000236.1:3804644-3804751
65	Cro-miR408	Catharanthus_roseus	CGGGGACGAGACAGAGCAUG	UGCACUGCCUCUUCCCUGGC	UGGUAAGGACAGACGGGGACGAGACAGAGCAUGAAAUGGAGCAUUCUAGCAUUUUCUUUCAUUCUAUGAUGUCUGUUUGUGGCCUUUCCAUUCCAUGCACUGCCUCUUCCCUGGCUGCCCUUUCC	-	cro_v2_scaffold_92:986248-986372
66	Car-miR408a	Coffea_arabica	ACGGGGACGAGGCAGCGCAUG	UGCACUGCCUCUUCCCUGGCU	UGGUAAGGACAGACGGGGACGAGGCAGCGCAUGAAAAGGGUGCAUUUCAACACCCUCUGGUUAUUUUGAUUUUUGGUGUUGAUGGCCUUUCCGUGCACUGCCUCUUCCCUGGCUGUCCUGUCAU	+	Ca_14_36:52639-52762
67	Car-miR408b	Coffea_arabica	ACGGGGACGAGGCAGCGCAUG	UGCACUGCCUCUUCCCUGGCU	UGGUAAGGACAGACGGGGACGAGGCAGCGCAUGAAAAGGGUGCAUUUCAACACCCUCUGGUUAUUUUGAUUUUUGGUGUUGAUGGCCUUUCCGUGCACUGCCUCUUCCCUGGCUGUCCUGUCAU	-	Ca_30_322:16769-16892
68	Car-miR408c	Coffea_arabica	ACGGGGACGAGGCAGCGCAUG	UGCACUGCCUCUUCCCUGGCU	UGGUAAGGACAGACGGGGACGAGGCAGCGCAUGAAAAGGGUGCAUUUCAACACCCUCUGGUUAUUUUGAUUUUUGGUGUUGAUGGCCUUUCCGUGCACUGCCUCUUCCCUGGCUGUCCUGUCAU	+	Ca_36_410:5096-5219
69	Car-miR408d	Coffea_arabica	ACGGGGACGAGGCAGCGCAUG	UGCACUGCCUCUUCCCUGGCU	UGGUAAGGACAGACGGGGACGAGGCAGCGCAUGAAAAGGGUGCAUUUCAACACCCUCUGGUUAUUUUGAUUUUUGGUGUUGAUGGCCUUUCCGUGCACUGCCUCUUCCCUGGCUGUCCUGUCAU	-	Ca_454_133:23219-23342
70	Car-miR408e	Coffea_arabica	ACGGGGACGAGGCAGCGCAUG	UGCACUGCCUCUUCCCUGGCU	UGGUAAGGACAGACGGGGACGAGGCAGCGCAUGAAAAGGGUGCAUUUCAACACCCUCUGGUUAUUUUGAUUUUUGGUGUUGAUGGCCUUUCCGUGCACUGCCUCUUCCCUGGCUGUCCUGUCAU	+	Ca_4_57:44216-44339
71	Car-miR408f	Coffea_arabica	ACGGGGACGAGGCAGCGCAUG	UGCACUGCCUCUUCCCUGGCU	UGGUAAGGACAGACGGGGACGAGGCAGCGCAUGAAAAGGGUGCAUUUCAACACCCUCUGGUUAUUUUGAUUUUUGGUGUUGAUGGCCUUUCCGUGCACUGCCUCUUCCCUGGCUGUCCUGUCAU	-	Ca_67_42:27322-27445
72	Car-miR408g	Coffea_arabica	ACGGGGACGAGGCAGAGCAUG	UGCACUGCCUCUUCCCUGGCU	UGGUAAGGACAGACGGGGACGAGGCAGAGCAUGAAAAGGGUGCAUUUCAACACCCUCUGGUUAUUUUGAUUUUUGGUGUUGACGGCCUUUCCGUGCACUGCCUCUUCCCUGGCUGUCCUGUCAU	-	Ca_88_107:2842-2965
73	Ama-miR408	Antirrhinum_majus	CAGGGACGAGUCAGAGCAUG	UGCACUGCCUCUUCCCUGGC	UGAGAAAAUGGGGAGACAGGGACGAGUCAGAGCAUGAUAAGGGAAUGGAGAUGUCGGCUUUGCCCUUUCCGUGCACUGCCUCUUCCCUGGCUCCCCUCUCU	+	Chr5:28761044-28761144
74	Dpr-miR408	Digitalis purpurea		CUGCACUGCCUCUUCCCUGGC	GGAGAGACGGGGACGAGACAGAGCAUGGCAAGGGAAAAAGAAAAUGGACUUAUUUGCUUUGCCCUUUCCCUGCACUGCCUCUUCCCUGGCUCUCC		JO460086.1:70-164
75	Pca-miR408a	Pogostemon_cablin	CGGGGACGAGGUAGAGCACG	UGCACUGCCUCUUCCCUGGC	UAGGUGGGGGGAGACGGGGACGAGGUAGAGCACGAGACGGACGUUUCAACCACGGUCAUGACGUCCUUUUCAUGCACUGCCUCUUCCCUGGCUCUCCUUCCU	+	QKXD01016931.1:369268-369369
76	Pca-miR408b	Pogostemon_cablin	CGGGGACGAGGUAGAGCAUG	UGCACUGCCUCUUCCCUGGC	UAGGUGGGGGAGACGGGGACGAGGUAGAGCAUGAGACAGACGUUUCAACCACAGUCAUGACGUCCUUUUCAUGCACUGCCUCUUCCCUGGCUCUCCUUCCU	+	QKXD01024597.1:198209-198309
77	Pca-miR408c	Pogostemon_cablin	CGGGGACGAGGUAGAGCACG	UGCACUGCCUCUUCCCUGGC	UAGGUGGGGGAGACGGGGACGAGGUAGAGCACGAGACGGACGUUUCAACCGCGGUCAUAACGUCCUUUUCAUGCACUGCCUCUUCCCUGGCUUUCCUUCCU	-	QKXD01035402.1:441703-441803
78	Smi-miR408a	Salvia miltiorrhiza	UGCACUGCCUCUUCCCUUGC	AAGGAAUGAGGCCAGUGGUG	CCUACGGCCAUGCACUGCCUCUUCCCUUGCUCGGACGAGUGUGACGGGUGUCGUCCGUCCCCUGAGGUGCAAGGCGGUAAUGAAACCCCGCAUAUCCAAGUGUGUUUUCAUAUCUGGAUGCUGGAAAUGUGGUCAGCUGGCCCUUGGAAGGAAUGAGGCCAGUGGUGGACGUCGU	-	scaffold2157_3:1917-2091
79	Smi-miR408b	Salvia miltiorrhiza	ACGGGGACGAGACAGAGCAUGG	AGCACUGCCUCUUCCCUGGCU	AUGACGGAGGAGACGGGGACGAGACAGAGCAUGGGAUGGACCUCUCAACACCAUACAUGGUGUUGUUGCCCUUUCCAGCACUGCCUCUUCCCUGGCUCCUCUCUCUC	-	scaffold3594_2:8112-8218
80	Can-miR408a	Capsicum_annuum	ACGGGGACGAGGCAGAGCAUG	UGCACUGCCUCUUCCCUGGCU	GAAUGGAUAGACGGGGACGAGGCAGAGCAUGAGAUGUGCAAUUUUGUGAAUUGCCCAUUCCAUGCACUGCCUCUUCCCUGGCUCUCCUCCC	+	PGAv.1.6.scaffold1248:450499-450589
81	Can-miR408b	Capsicum_annuum	ACAGGGACGAGGCAGCGCAUG	UGCACAGCCUCUUCCCUGGCU	UGGACAGGAUAGACAGGGACGAGGCAGCGCAUGAGAUGUUCAAUUUUACUAAUUGCCCAUUCCAUGCACAGCCUCUUCCCUGGCUCUCCUCCCCU	+	PGAv.1.6.scaffold1248:480121-480215
82	Cuca-miR408	Cuscuta_campestris	ACGGGGACGAGGUAGAGCAUG	UGCACUGCCUCUUCCCUGGCU	GUGAGGGUAGACGGGGACGAGGUAGAGCAUGAGAUGGGUCAUUCGGCUUCAAGGGUUGCCACCCUUCCCGUGCACUGCCUCUUCCCUGGCU	-	Ccam0.32_scaffold110:282205-282295
83	Iba-miR408a	Ipomoea batatas	ACGGGGACGAGGCAGAGCAUG	UGCACUGCCUCUUCCCUGGCU	CGGAGAGGGUAGACGGGGACGAGGCAGAGCAUGAGAUGGGCAGUUGGGGUUAUGUUGCUGCCCUUUCCAUGCACUGCCUCUUCCCUGGCUCUCCUUUCCU	+	chr1:14727315-14727414
84	Iba-miR408b	Ipomoea batatas	ACGGGGACGAGGCGGAGCAUG	UGCACUGCCUCUUCCCUGGCU	UGGAGAGGGUAGACGGGGACGAGGCGGAGCAUGAGAUGGGCAGUUGGGGUUAAGUUGCUGCCCUUUCCAUGCACUGCCUCUUCCCUGGCUCUCCUUUCCU	+	chr1:14931176-14931275
85	Iba-miR408c	Ipomoea batatas	UGCUCUGCCUCUUCCCUGGCG	CGGAGGGAGAUAGUGCAUA	AAACAUGACCUGCUCUGCCUCUUCCCUGGCGGCCUCCAUAGACGGCCGCGGAGGGAGAUAGUGCAUAGCCUCCGGGACAUAAGUCUCGUCCCCGAGGCCAGACCGCUCUAAGAUCUUACGCUGAAACUCGAGGCUCGACUCAUCGAAGUCUCCGGUGAGCCUCGAGUGAUCCAUAAACCGCUGAUACGGAGCCUUGAGGUUAUCGGGAGGGCGAUAACAGGAAUAAUCAACCAAAUAAACCGGCCGCGGCCGGGUCAUGAUA	+	chr1:27200258-27200519
86	Iba-miR408d	Ipomoea batatas	ACGGGGACGAGGCGGAGCAUG	UGCACUGCCUCUUCCCUGGCU	UGGAGAGGGUAGACGGGGACGAGGCGGAGCAUGAGAUGGGCAGUUGGGGUUAAGUUGCUUCCCUUUCUAUGCACUGCCUCUUCCCUGGCUCUCCUUUCCU	+	scaffold21617:312-411
87	Nta-miR408a	Nicotiana tabacum	UGACUAUAUCUUGCCUUUCUUU	ACAGGGACGAGGUAGAGCAUG	UAGCACUAGUACUAUGACUAUAUCUUGCCUUUCUUUACUCCUUAAUAAAGCAGCCAUUGCAUUAACCAUUUGGCCAUUGGCAAUUUUCAAGAAAAGAUUUUUUCAUUUAUUCUAUAUACUUCUACUAUGGAAAGCAUUGACAAAGAGUCUCUAUUGAGGUAAAGGGCAGUGGCAAAGGGAGUCUCUAUUGAGGUAAAAUAUGGUGUGGAAUAUGGAAGAUGGAGAGGAUAGACAGGGACGAGGUAGAGCAUGAGAUGUGCAA	+	NW_015883377.1:11417-11678
88	Nta-miR408b	Nicotiana tabacum	ACAGGGACGAGGUAGAGCAUG	UGCACUGCCUCUUCCCUGGCU	AUGGAGAGGAUAGACAGGGACGAGGUAGAGCAUGAGAUGUGCAAUUUUUGCUUGCCCAUUCUAUGCACUGCCUCUUCCCUGGCUCUCCUCCCUC	+	NW_015921398.1:53479-53572
89	Nbe-miR408a	Nicotiana_benthamiana	AUAGGGACGAGGUAGAGCAUG	UGCACUGCCUCUUCCCUGGCU	AUGGAGAGGAUAGAUAGGGACGAGGUAGAGCAUGAGAUGUGCAAUUUUGGCUUGCCCAUUCUAUGCACUGCCUCUUCCCUGGCUCUCCUCCCUC	+	Niben.v0.4.2.Scf10838.Ctg0:14844-14937
90	Nbe-miR408b	Nicotiana_benthamiana	GCAGGGACGAGGUAGAGCAUG	UGCACUGCCUCUUCCCUGGCU	AUGGAGAGGAUAGGCAGGGACGAGGUAGAGCAUGAGAUGUGCAAUUUUUGCUUGCCCAUUCUAUGCACUGCCUCUUCCCUGGCUCUCCUCCCUC	-	Niben.v0.4.2.Scf21906.Ctg3:2506-2599
91	Sly-miR408a	Solanum_lycopersicum	GACAGGGACGAGGCAGCGCAUG	UGCACAGCCUCUUCCCUGGCUU	AGUGGAGAGGAUAGACAGGGACGAGGCAGCGCAUGAGAUGUACAAUUUUAUUAGUUGUCCAUUCCAUGCACAGCCUCUUCCCUGGCUUUCCUCCCCCA	-	SL3.0ch01:90909448-90909545
92	Sly-miR408b	Solanum_lycopersicum	ACGGGGACGAGCCAGAGCAUG	UGCACUGCCUCUUCCCUGGCU	GGUAUGGAUAGACGGGGACGAGCCAGAGCAUGAGAUGUGCAAUUUUUGCUUUGCCUAUUCCAUGCACUGCCUCUUCCCUGGCUCUCCUCUCCC	-	SL3.0ch01:90917970-90918062
93	Sme-miR408	Solanum_melongena	ACGGGGACGAGACAGAGCAUG	UGCACUGCCUCUUCCCUGGCU	UGGAGUGGAUAGACGGGGACGAGACAGAGCAUGAGAUGUGCAAUUUUACUUGCCCAUUCCAUGCACUGCCUCUUCCCUGGCUCUCCUCUCCC	-	Sme2.5_06140.1:861-952
94	Spi-miR408a	Solanum_pimpinellifolium	GACAGGGACGAGGCAGCGCAUG	UGCACAGCCUCUUCCCUGGCUU	GUGGAGAGGAUAGACAGGGACGAGGCAGCGCAUGAGAUGUACAAUUUUAUUAGUUGUCCAUUCCAUGCACAGCCUCUUCCCUGGCUUUCCUCCCCAA	-	NRDK01039047.1:42675-42771
95	Spi-miR408b	Solanum_pimpinellifolium	ACGGGGACGAGCCAGAGCAUG	UGCACUGCCUCUUCCCUGGCU	GGUAUGGAUAGACGGGGACGAGCCAGAGCAUGAGAUGUGCAAUUUUUGCUUUGCCUAUUCCAUGCACUGCCUCUUCCCUGGCUCUCCUCUCCC	-	NRDK01039047.1:51200-51292
96	Stu-miR408a	Solanum_tuberosum	ACAGGGACGAGGCAGCGCAUG	UGCACAGCCUCUUCCCUGGUU	GGAGAGGAUAGACAGGGACGAGGCAGCGCAUGAGAUGUACAAUUUUACUAGUUGCCCAUUCCAUGCACAGCCUCUUCCCUGGUUCUCCUCCCCC	-	SU4.03ch01:78858631-78858724
97	Stu-miR408b	Solanum_tuberosum	ACGGGGACGAGACAGAGCAUG	UGCACUGCCUCUUCCCUGGC	GGUAUGGAUAGACGGGGACGAGACAGAGCAUGAGAUGUGCAAUUUUUACUUGCCUAUUCCAUGCACUGCCUCUUCCCUGGCUCUCCUCUCC	-	SU4.03ch01:78900472-78900562
98	Vvi-miR408	Vitis_vinifera	CGGGGACGAGGUAGUGCAUGG	AUGCACUGCCUCUUCCCUGGC	CAAGAGGAAGACGGGGACGAGGUAGUGCAUGGAUGGAACUAUUAACAGAAGAAUGUUAAGCUGUUUUUGCUCUACCCAUGCACUGCCUCUUCCCUGGCUCUGUCUCUC	+	chr7:5011934-5012041
99	Hbr-miR408a	Hevea_brasiliensis	CUGGGAACAGGCAGAGCAUG	UGCACUGCCUCUUCCCUGGC	AAGACAUACAAAGACUGGGAACAGGCAGAGCAUGAAUGGAGCUACAAACAGAAAUCUCUGUUUUGGCACCACCCAUGCACUGCCUCUUCCCUGGCUUGUGGCUCU	-	Contig1329:177011-177115
100	Hbr-miR408b	Hevea_brasiliensis	CUGGGAACAGGCAGAGCAUG	UGCACUGCCUCUUCCCUGGC	AAGAGACAGACUAAGACUGGGAACAGGCAGAGCAUGGAUGGAGCUAUUAACGGAAAUAUCUGUUUUGGCUCCACCCAUGCACUGCCUCUUCCCUGGCUUGUGGCUCU	-	Contig189208:15543-15649
101	Jcu-miR408a	Jatropha_curcas	CUGGGAACAGGCAGAGCAUGG	AUGCACUGCCUCUUCCCUGGC	ACAGACAAAGGCUGGGAACAGGCAGAGCAUGGAUUGAGCUACUAACAGAAAUAUCUGUUUUGGCUCUACCCAUGCACUGCCUCUUCCCUGGCUUGUGAAUCU	-	Jcr4S01894:1508-1609
102	Jcu-miR408b	Jatropha_curcas	CUGGGAACAGGCAGAGCAUGG	AUGCACUGCCUCUUCCCUGGC	ACAGACAAAGGCUGGGAACAGGCAGAGCAUGGAUUGAGCUACUAACAGAAAUAUCUGUUUUGGCUCUACCCAUGCACUGCCUCUUCCCUGGCUUGUGAAUCU	+	Jcr4S17700:3932-4033
103	Lus-miR408	Linum_usitatissimum	CUGGGAACAGACAGAGCAUGG	UGCACUGCCUCUUCCCUGGCCU	AAAAAAAGAGGCUGGGAACAGACAGAGCAUGGAUAGAGCUUACUUACAGAAACCCUUUUGUUUUGACCCUUCCCAUGCACUGCCUCUUCCCUGGCCUUUUUCCCUCU	+	scaffold475:968244-968350
104	Mes-miR408a	Manihot_esculenta	ACUGGGAACAGGCAGAGCAUG	AUGCACUGCCUCUUCCCUGGC	GGCUGACAAAGACUGGGAACAGGCAGAGCAUGGAUGGAGCUAUUAAUGGAAAUAUCUGUUUUGGCUCCACCCAUGCACUGCCUCUUCCCUGGCUUGUGGCUCC	-	Chromosome01:31622755-31622857
105	Mes-miR408b	Manihot_esculenta	ACUGGGAACAGGCAGAGCAUG	AUGCACUGCCUCUUCCCUGGC	GACGGACAAAGACUGGGAACAGGCAGAGCAUGGGUGGAACUAUUAACACAAGUAUCUGUUUUAGCACCACCCAUGCACUGCCUCUUCCCUGGCUUGCGGGUCU	+	Chromosome05:656233-656335
106	Rco-miR408	Ricinus communis		CUGCACUGCCUCUUCCCUGGC	AAAGACUGGGAACAGGCAGUGCAUGGAUGGGGCUACUAACAGAAAACAUCUGUUUUGGCUCUACCCCUGCACUGCCUCUUCCCUGGCUUCCG		EQ973790.1: 821262-821353
107	Ptr-miR408	Populus_trichocarpa	CGGGGAACAGGCAGAGCAUG	UGCACUGCCUCUUCCCUGGC	AAGACGGGGAACAGGCAGAGCAUGGAUGGAGCUACUAACAGAAGUACUUGUUUUGGCUCUACCCAUGCACUGCCUCUUCCCUGGCUUGUGGCUCU	+	Chr02:14792903-14792997
108	Cfo-miR408	Cephalotus_follicularis	CAGGGAACAGGCUGAGCAUGA	AUGCACUGCCUCUUCCCUGGC	AAGGGGCAAGCCAAGACAGGGAACAGGCUGAGCAUGAAUGGAACUACUAACACAUUUUUCUGUUGUGGUUCUACUCAUGCACUGCCUCUUCCCUGGCUGGUGCUCUU	-	scaffold2644:78524-78630
109	Ahy-miR408	Arachis hypogaea	CUGGGAACAGGCAGAGCAUGA	AUGCACUGCCUCUUCCCUGGC	GAAGAAGAGAUGACAAAGAACUGGGAACAGGCAGAGCAUGAAUGGAACUAUCAAUAGACACAUUUUGUUCAUUGACGCUCAUGCACUGCCUCUUCCCUGGCUCUCUCUUUCUUUUUCCUUCU
110	Adu-miR408	Arachis_duranensis	CUAGGGAUGAGAUAGAGCAUG	UGCACUGCCUCUUCCCUGGCU	UAAAGACAAAGCUAGGGAUGAGAUAGAGCAUGGAUGGGGCUAUCAACAGAAAAGAAUAAUGAAGAAAGAAGCUAAGAGGAGAAAAGAAAGAAAUUUGUUGUGGCUUCGUUCAUGCACUGCCUCUUCCCUGGCUUUGGCUCUUU	-	aradu.V14167.gnm1.Aradu.A09:18818145-18818287
111	Aip-miR408	Arachis_ipaensis	CUAGGGAUGAGAUAGAGCAUG	UGCACUGCCUCUUCCCUGGCU	UAAAGACAAAGCUAGGGAUGAGAUAGAGCAUGGAUGGGGCUAUCAACAGAAAAGAAUAAUGAAGAAAGAAGCUAAGAGGAGAAAAGAAAGAAAUUUGUUGUGGCUUCGUUCAUGCACUGCCUCUUCCCUGGCUUUGGCUCUUU	-	araip.K30076.gnm1.Araip.B09:24223943-24224085
112	Amo-miR408a	Arachis_monticola	CUAGGGAUGAGAUAGAGCAUG	UGCACUGCCUCUUCCCUGGCU	UAAAGACAAAGCUAGGGAUGAGAUAGAGCAUGGAUGGGGCUAUCAACAGAAAAGAAUAAUGAAGAAAGAAGCUGAGAGGAGAAAAGAAAGAAAUUUGUUGCGGCUUCGUUCAUGCACUGCCUCUUCCCUGGCUUUGGCUCUUU	-	CM009781.1:11646210-11646352
113	Amo-miR408b	Arachis_monticola	CUAGGGAUGAGAUAGAGCAUG	UGCACUGCCUCUUCCCUGGCU	UAAAGACAAAGCUAGGGAUGAGAUAGAGCAUGGAUGGGGCUAUCAACAGAAAAGAAUAAUGAAGAAAGAAGCUAAGAGGAGAAAAGAAAGAAAUUUGUUGUGGCUUCGUUCAUGCACUGCCUCUUCCCUGGCUUUGGCUCUUU	-	CM009791.1:25825939-25826081
114	Cca-miR408a	Cajanus cajan	CUGGGAACAGGCAGAGCACG	UGCACUGCCUCUUCCCUGGCU	CAAGAGACAGGACAAAGGCUGGGAACAGGCAGAGCACGAAUGGAUCUAUCAACAGAAAAAUAAUGAAGUGAGAAUGAGAGGAGGGAGAGAUCUGUUGUGGCUACACUCAUGCACUGCCUCUUCCCUGGCUCUGUCUCUUU	+	cajca.ICPL87119.gnm1.Cc03:26792528-26792667
115	Cca-miR408b	Cajanus cajan	CAGGGGAACAGGCAGAGCAUG	UGCACUGCCUCUUCCCUGGCU	ACAGGACAAAGCAGGGGAACAGGCAGAGCAUGGAUGGAGCUAUCAACACAACAAAGUGAGAGGAGAAAUCUGUUGAGGUUUUGCUCAUGCACUGCCUCUUCCCUGGCUCUGUCUCUAU	+	cajca.ICPL87119.gnm1.Cc11:42071863-42071980
116	Ciar-miR408	Cicer_arietinum	CAGGGAACAGGCUGAGCAUGG	AUGCACUGCCUCUUCCCUGGC	CAGCACAAAGACAGGGAACAGGCUGAGCAUGGAUGGAACUAUCGACAGAAUUGAGGAGACAACUGUCAUGGUUCCACUCAUGCACUGCCUCUUCCCUGGCUCUGUUCCAA	+	cicar.CDCFrontier.gnm1.Ca4:6878251-6878360
117	Gma-miR408a	Glycine max	CAGGGGAACAGGCAGAGCAUG	AUGCACUGCCUCUUCCCUGGC	ACAGGACAAAGCAGGGGAACAGGCAGAGCAUGGAUGGAGCUAUCAACACAAUAUUGUCAAGAAACUGAGAGUGAGAGGAGAAAUAUGUUGUGGUUCUGCUCAUGCACUGCCUCUUCCCUGGCUCUGUCUCCA	+	Gm02:837419-837550
118	Gma-miR408b	Glycine max	CUGGGAACAGGCAGGGCACGA	AUGCACUGCCUCUUCCCUGGC	CAGGACAAAGGCUGGGAACAGGCAGGGCACGAAUGGAGCUAUCAACAGAAAAUGGUAAAGUGAGAAUGAAAGGAGAGAGAGAGAGAGAGAUCUGUUGUGGCUACGCUCAUGCACUGCCUCUUCCCUGGCUCUGUCUCUU	-	Gm03:44626692-44626830
119	Gma-miR408c	Glycine max	CAGGGGAACAGGCAGAGCAUG	AUGCACUGCCUCUUCCCUGGC	ACAGGACAAAGCAGGGGAACAGGCAGAGCAUGGAUGGAGCUAUCAACACAAUAUUGUCAAGAAAGUGAGAAAGUGAGAGGAGAAAUCUGUUGUGGUUCUGCUCAUGCACUGCCUCUUCCCUGGCUUUGUCUCUA	-	Gm10:36557001-36557134
120	Gma-miR408d	Glycine max	CUGGGAACAGGCAGAGCACGA	AUGCACUGCCUCUUCCCUGGC	CAGGGCAAAGGCUGGGAACAGGCAGAGCACGAAUGGAGCUAUCAACAGAAAAUGGAGAAGUGAGAAAUGAGAGGAGAGAAAGAGAGAGAUCUGUUAGGGCUACGCUCAUGCACUGCCUCUUCCCUGGCUCUGUCUCUU	-	Gm19:47163684-47163821
121	Gso-miR408a	Glycine soja	CAGGGGAACAGGCAGAGCAUG	AUGCACUGCCUCUUCCCUGGC	ACAGGACAAAGCAGGGGAACAGGCAGAGCAUGGAUGGAGCUAUCAACACAAUAUUGUCAAGAAACUGAGAGUGAGAGGAGAAAUAUGUUGUGGUUCUGCUCAUGCACUGCCUCUUCCCUGGCUCUGUCUCCA	+	NC_041003.1:832363-832494
122	Gso-miR408b	Glycine soja	CUGGGAACAGGCAGGGCACGA	AUGCACUGCCUCUUCCCUGGC	CAGGACAAAGGCUGGGAACAGGCAGGGCACGAAUGGAGCUAUCAACAGAAAAUGGUAAAGUGAGAAUGAAAGGAGAGAGAGAGAGAGAGAUCUGUUGUGGCUACGCUCAUGCACUGCCUCUUCCCUGGCUCUGUCUCUU	-	NC_041004.1:44492514-44492652
123	Gso-miR408c	Glycine soja	CAGGGGAACAGGCAGAGCAUG	AUGCACUGCCUCUUCCCUGGC	ACAGGACAAAGCAGGGGAACAGGCAGAGCAUGGAUGGAGCUAUCAACACAAUAUUGUCAAGAAAGUGAGAAAGUGAGAGGAGAAAUCUGUUGUGGUUCUGCUCAUGCACUGCCUCUUCCCUGGCUUUGUCUCUA	-	NC_041011.1:38625606-38625739
124	Gso-miR408d	Glycine soja	GCUGGGAACAGGCAGAGCACG	AUGCACUGCCUCUUCCCUGGC	ACAGGGCAAAGGCUGGGAACAGGCAGAGCACGAAUGGAGCUAUCAACAGAAAAUGGAGAAGUGAGAAAUGAGAGGAGAGAAAGAGAGAGAUCUGUUAGGGCUACGCUCAUGCACUGCCUCUUCCCUGGCUCUGUCUCUU	-	NC_041020.1:47284539-47284677
125	Lja-miR408	Lotus japonicus		CAGGGAAGAGGCAGAGCAUGG	AUGUUAUUUUGCUGAUGUUGACAGGGAUGAGCUAAGUUGAUCUUGAUGGAGAGACAUGACAAUGGCAGGGAAGAGGCAGAGCAUGGAUGGAGCUAUCAACAAAAUAAAUUGAGAAUGGGAGAAGUUUGUUGUGGCUCUACUCAUGCACUGCCUUUUCCCUGGCCACGUCUCAGUCUCCGUUUCUCAUGAGAGCAUGUUAGGAUACACAGUAGAAAAAACAU	+	Chr6: 16493676-16493896
126	Lan-miR408a	Lupinus_angustifolius	UAGGGAACAGGUAGAGCAUGG	AUGCACUGCCUCUUCCCUGGC	AUAUGACAAAGCUAGGGAACAGGUAGAGCAUGGAUGAGGCUAUCAACAGAGAUCAGAGAAUGAAAACAAAUAUGUUGUAGCUUCAGUUAUGCACUGCCUCUUCCCUGGCUAAGUUUCUU	+	lupan.Uanjil.gnm1.NLL-08:5998821-5998939
127	Lan-miR408b	Lupinus_angustifolius	UGGGAACAGGUAGAGCAUGA	AUGCACUGCCUCUUCCCUGGC	AUGAGACAUGACAAAGGCUGGGAACAGGUAGAGCAUGAAUGGAGCUAACAACAGAAUAUAGUCAUAGGAAGUGAGAAUGAGAGGAAGAAGAACCUGUUGUGGCUACGCUCAUGCACUGCCUCUUCCCUGGCUCUGGCUCUG	-	lupan.Uanjil.gnm1.NLL-16:16559052-16559192
128	Mtr-miR408	Medicago_truncatula	ACAGGGAACAUGCAGAGCAU	AUGCACUGCCUCUUCCCUGGC	ACAGGACAAAGACAGGGAACAUGCAGAGCAUGGAUGAAACUAUCGACAGUGAAGGAAACUGUUGUGGCUCCACUCAUGCACUGCCUCUUCCCUGGCUUAUAAUCUG	+	chr1:38577662-38577767
129	Pvu-miR408a	Phaseolus_vulgaris	CUGGGAAAAGGCAGAGCAAGA	UGCACUGCCUCUUCCCUGGCU	CAGGACAAAGGCUGGGAAAAGGCAGAGCAAGAAUGUAGCUAUUGACAGAAAUGGUGAAGUGAGAAUGAGAGGAGAGAGAUAUCUGUUGUGGCUACGCUCAUGCACUGCCUCUUCCCUGGCUCUCUCUCUUU	-	Chr01:47346395-47346525
130	Pvu-miR408b	Phaseolus_vulgaris	CAGGGGAACAGGCAGAGCAUG	UGCACUGCCUCUUCCCUGGCU	ACAGGACAGAGCAGGGGAACAGGCAGAGCAUGGAUGGAGUUAUCAACACAAUGGAGCCAAGAAAGUGAGAGUGACAGGAGAAAUUAUCUGUUGUGGUUCUGCUCAUGCACUGCCUCUUCCCUGGCUCUGUCUCCAU	+	Chr07:33227992-33228127
131	Vun-miR408	Vigna unguiculata		AUGCACUGCCUCUUCCCUGGC	UGUUAAGGAUGUCCACAACAAGGUCGAGGUAACAGUCAGAAACAGGACAGAGCAGGGGAACAGGCAGAGCAUGGAUGGAGUCAUCAACACAAUAGAGCCAAGAAAAUGAGAGUGACAGAACAAAUUAUCUGUUGUGAUUCUGCUCAUGCACUGCCUCUUCCCUGGCUCUAUCAGUAUUUCUCCUUUCUUUCAUAUUGAAUCCAAAACUUUUUUUCUCUUAAGUUUUAGCACAAAUUCACAACC		FF541856.1:81-323
132	Vra-miR408a	Vigna_radiata	CUGGGAAGAUGCAGAGCACG	UGCACUGCCUCUUCCCUGGCU	ACAAACAAAGGCUGGGAAGAUGCAGAGCACGAAUGAAGCUAUCAACAGAAAAUGGUGAAGUCAGAAUGAGAGUAGAAAGAGAGAGAGAGAGAGAAAGAUCUGUUGUGGCCACGCUCAUGCACUGCCUCUUCCCUGGCUCUACCUCUUU	-	3:8302367-8302514
133	Vra-miR408b	Vigna_radiata	CAGGGGAACAGGCAGAGCAUG	UGCACUGCCUCUUCCCUGGCU	ACAGGACAGAGCAGGGGAACAGGCAGAGCAUGGAUGGAGUCAUCAACACAAUAGAGCUAAGAAAGUGAGAGUGACAGAGAAAUCAUUUGUUGUGGUUCUGCUCAUGCACUGCCUCUUCCCUGGCUCUGUCUCCUU	-	scaffold_273:96522-96656
134	Cla-miR408	Citrullus_lanatus	GCGGGGAACAGACAGAGCAUG	UGCACUGCCUCUUCCCUGGCUG	GGAUUGGGGAGAAGAGCAGCGGGGAACAGACAGAGCAUGAAUGGAGUCCUCAACAGACUCGAAUCCUGUUGUGCCUCUACUCAUGCACUGCCUCUUCCCUGGCUGCCCUCAUUAU	+	CG_Chr11:26516036-26516150
135	Cme-miR408	Cucumis_melo	GGGGAACAGACAGAGCAUGA	AUGCACUGCCUCUUCCCUGGC	UUGGGGGAGAAAGAGCAGCGGGGAACAGACAGAGCAUGAAUGGAGUCCUCAACAGUCUCAAAAUCAAAUCAACACAUACCUUUUACCCUUUUAUCUUCCUGUUGUGCCUCUACUCAUGCACUGCCUCUUCCCUGGCUGCCCCUUAU	-	chr10:4592097-4592242
136	Csa-miR408	Cucumis_sativus	GCGGGGAACAGACAGAGCAUG	UGCACUGCCUCUUCCCUGGCUG	GGGGUUUGGGGUUUGGGGGUUGGGGGAGAAAGAGCAGCGGGGAACAGACAGAGCAUGAAUGGAGUCCUCAACAGACUUAAAAUCAAAUCAACACAAACCUUUAUAUCUUACUGUUGUGCCUCUACUCAUGCACUGCCUCUUCCCUGGCUGCCCCUUAUUU	+	chr5:24610666-24610825
137	Cma-miR408	Cucurbita_maxima	CGGGGAACAGACAGCGCAUGG	AUGCACUGCCUCUUCCCUGGC	GAGAACGGCAGCGGGGAACAGACAGCGCAUGGAUGGAGUCCUCAACAAAACCUUUGCCUUCCUCUCUUUGUUGGGCCUCUACUCAUGCACUGCCUCUUCCCUGGCUGCCUUCAUA	+	Cma_Chr18:6202942-6203056
138	Cmo-miR408	Cucurbita_moschata	GCGGGGAACAGACAGCGCAUG	UGCACUGCCUCUUCCCUGGCUG	UGGGAGAACGGCAGCGGGGAACAGACAGCGCAUGGAUGGAGUCCUCAACAAAACAAAACCUUUGCCUUCCUCUCUUUGUUGGGCCUCUACUCAUGCACUGCCUCUUCCCUGGCUGCCUUCAUAUU	-	Cmo_Chr18:8190814-8190938
139	Lsi-miR408	Lagenaria_siceraria	GGGGAACAGACAGAGCAUGA	AUGCACUGCCUCUUCCCUGGC	UUUGGGGAUUGGGAGAGAAAAGCAGCGGGGAACAGACAGAGCAUGAAUGGAGUCCUCAACAGACUUAAAUCAACAAGCCUUAGCCUUUCCUGUUGUGCCUCUACUCAUGCACUGCCUCUUCCCUGGCUGCCCCUCAU	-	chr04:6605335-6605471
140	Jre-miR408	Juglans_regia	CAGGGAGUGGGCAGAGCAUGG	UGCACUGCCUCUUCCCUGGCUG	ACAAACAUAGACAGGGAGUGGGCAGAGCAUGGAUGGAACCGUCGACAGGAUUGGAGCCUGUUGUGGCUCUACUCAUGCACUGCCUCUUCCCUGGCUGUGCCUCUCUC	+	NW_017436839.1:1060-1166
141	Boni-miR408	Boehmeria nivea	CAGGGAAUGGACAGAGCAUGG	AUGCACUGCCUCUUCCCUGGC	GAGAGAAAAGGCAGGGAAUGGACAGAGCAUGGAUGGAGCUUUCAACAGAGAAAGGAAUAGCUGUUGGUGGCUCUACUCAUGCACUGCCUCUUCCCUGGCUCUCCAACUA	-	PHNS01010245.1:1926658-1926766
142	Fan-miR408	Fragaria_ananassa	CAGGGACGAGGUAGAGCAUGG	AUGCACUGCCUCUUCCCUGGC	AUAAAUAAAGACAGGGACGAGGUAGAGCAUGGAUGGAGUUCCCAACAGAACAGUCAAGCUGUUGUGGCUCCACUCAUGCACUGCCUCUUCCCUGGCUUUGACUCCU	+	FANhyb_rscf00007485.1:1251-1356
143	Fve-miR408	Fragaria_vesca	ACAGGGACGAGGUAGAGCAUG	UGCACUGCCUCUUCCCUGGCU	UGAUAAAUAAGACAGGGACGAGGUAGAGCAUGGAUGGAGUUCCCAACAGAACAGUCAAGCUGUUGUGGCUCCACUCAUGCACUGCCUCUUCCCUGGCUUUGACUCCUC	+	Fvb1:18195175-18195282
144	Mdo-miR408a	Malus_domestica	ACAGGGAAGAGGUAGAGCAUG	AUGCACUGCCUCUUCCCUGGC	GAGUUAAUAAGACAGGGAAGAGGUAGAGCAUGGAUGGAGUUCUCAAGAGCAAAAUAGAGCUCUUGUGACUCUACUCAUGCACUGCCUCUUCCCUGGCUUUGCCUCCC	-	MDC006505.260:3723-3829
145	Mdo-miR408b	Malus_domestica	ACAGGGAAGAGGUAGAGCAUG	UGCACUGCCUUUUCCCUGGCU	AGUUAAUAAGACAGGGAAGAGGUAGAGCAUGGAUGGAGUUCUCAAGAGCAAAAUAGAGCUCUUGUGACUCUACUCAUGCACUGCCUUUUCCCUGGCUUUGCCUCC	-	MDC006859.349:17325-17429
146	Mno-miR408	Morus_notabilis	CAGGGAACGGGCAGAGCAUGG	AUGCACUGCCUCUUCCCUGGC	GCAGAAUAAGGCAGGGAACGGGCAGAGCAUGGAUGGAGCCUUCAACACAAGGAAUGCUGUUGUGGCUCUACUCAUGCACUGCCUCUUCCCUGGCUGUGCCUCUC	-	KE343864:141809-141912
147	Pav-miR408	Prunus_avium	ACAGGGAACAGGUAGAGCAUG	UGCACUGCCUCUUCCCUGGCU	AGACUGAUAAGACAGGGAACAGGUAGAGCAUGGAUGGAGUUCCCAACAGAAAAACAGAGCUGUUGUGACUCUACUCAUGCACUGCCUCUUCCCUGGCUGCCGUCCUCA	-	Pav_sc0000491.1:453989-454096
148	Pdu-miR408	Prunus_dulcis	ACAGGGAACAGGUAGAGCAUG	UGCACUGCCUCUUCCCUGGCU	ACAGGGAACAGGUAGAGCAUGGAUGGAGUUCCCAACAGAAAAAUAGAGCUGUUGUGGCUCCACUCAUGCACUGCCUCUUCCCUGGCUUCCGUCCACA	+	LR694008.1:265364-265460
149	Ppe-miR408	Prunus_persica	ACAGGGAACAGGUAGAGCAUG	UGCACUGCCUCUUCCCUGGCU	AGACUGAUAAGACAGGGAACAGGUAGAGCAUGGAUGGAGUUCCCAACAGAAAAAUAGAGCUGUUGUGGCUCUACUCAUGCACUGCCUCUUCCCUGGCUGCCGUCCUCA	+	Pp03:244871-244978
150	Pbr-miR408	Pyrus_bretschneideri	CAGGGAAGAGGUAGAGCAUGG	AUGCACUGCCUCUUCCCUGGC	AGUUAAUAAGACAGGGAAGAGGUAGAGCAUGGAUGGAGUUCUCAAGAGCAAAAUAGAGCUCUUGUGACUCUACUCAUGCACUGCCUCUUCCCUGGCUUUACCUCCC	-	chr9:2190803-2190908
151	Zju-miR408	Ziziphus_jujuba	ACAGGGAAGCGGCAGAGCAUG	UGCACUGCCUCUUCCCUGGCU	AAAAUAAAAAGACAGGGAAGCGGCAGAGCAUGGAUGGAGCCAUCACCAGAAUGCGGAAAGCUGUUGUGGCUCUACUCAUGCACUGCCUCUUCCCUGGCUUGCCAUAUCA	+	NC_029687.1:3706666-3706774
152	Hlu-miR408a	Humulus_lupulus	ACAGGGAACAGACAGAGCAUG	AUGCACUGCCUCUUCCCUGGC	AACAGAACAAGACAGGGAACAGACAGAGCAUGGAUGGAGCUUUCGACAGAAUGUGAAGCCUGUUGUGGCUCUACUCAUGCACUGCCUCUUCCCUGGCUCACCCUGUG	-	004658F:226703-226809
153	Hlu-miR408b	Humulus_lupulus	ACAGGGAACAGACAGAGCAUG	AUGCACUGCCUCUUCCCUGGC	AACAGAACAAGACAGGGAACAGACAGAGCAUGGAUGGAGCUUUCGACAGAAUGUGAAGCCUGUUGUGGCUCUACUCAUGCACUGCCUCUUCCCUGGCUCACCCUGUG	-	006339F:202751-202857
154	Pgr-miR408	Punica_granatum	UGGGAACAGGCAGGGCAUGG	AUGCACUGCCUCUUCCCUGGU	AAGAGACUGGAACGGAGACUGGGAACAGGCAGGGCAUGGAUGGAUCCACAACAGAGACAAACAGCGGGAUAGAGAUCGAGUCACGGAUCGAGAGAUCAAUCCGAAUUAGAGGACGAGUAUGAGGAAGAAGAAGCUGUUGUGGUGUCCUCCCAUGCACUGCCUCUUCCCUGGUCUUGUGCUCU	+	MUKU01002440.1:2629555-2629736
155	Cgr-miR408	Citrus_grandis	ACGGGGAACAGGCAGAGCAUG	UGCACUGCCUCUUCCCUGGC	AGAGACAAAAGACGGGGAACAGGCAGAGCAUGGAUGGAACCAUUAACAGGUCCUCUGUUUUGGCUCCUCCCAUGCACUGCCUCUUCCCUGGCUCUCUGCCUU	-	chr5:45383853-45383954
156	Cre-miR408	Citrus_reticulata	ACGGGGAACAGGCAGAGCAUG	AUGCACUGCCUCUUCCCUGGC	AGAGACAAAAGACGGGGAACAGGCAGAGCAUGGAUGGAACCAUUAACAGGUCCUCUGUUUUGGCUCCUCCCAUGCACUGCCUCUUCCCUGGCUCUCUGCCUU	+	scaffold86027_cov91:5304475-5304576
157	Cisi-miR408	Citrus_sinensis	ACGGGGAACAGGCAGAGCAUG	AUGCACUGCCUCUUCCCUGGC	AGAGACAAAAGACGGGGAACAGGCAGAGCAUGGAUGGAACCAUUAACAGGUUCUCUGUUUUGGCUCCUCCCAUGCACUGCCUCUUCCCUGGCUCUCUGCCUU	-	chrUn:28033753-28033854
158	Lch-miR408a	Litchi_chinensis	CGGGGAACAGGCAGAGCAUGG	AUGCACUGCCUCUUCCCUGGC	AAGAGACAAAGACGGGGAACAGGCAGAGCAUGGAUGCAACUAUUAACAAUCUAACUGUUUUGGCUUCACCCAUGCACUGCCUCUUCCCUGGCUCUGGCUCCU	-	Chr3:12012192-12012293
159	Lch-miR408b	Litchi_chinensis	CGGGGAACAGGCAGAGCAUGG	AUGCACUGCCUCUUCCCUGGC	AAGAGACAAAGACGGGGAACAGGCAGAGCAUGGAUGCAACUAUUAACAAUCUAACUGUUUUGGCUUCACCCAUGCACUGCCUCUUCCCUGGCUCUGGCUCCU	-	Chr3:12033701-12033802
160	Ath-miR408	Arabidopsis thaliana	ACAGGGAACAAGCAGAGCAUG	AUGCACUGCCUCUUCCCUGGC	AUGAGAGAGAGACAGGGAACAAGCAGAGCAUGGAUUGAGUUUACUAAAACAUUAAACGACUCUGUUUUGUCUCUACCCAUGCACUGCCUCUUCCCUGGCUCCCUCUUUU	+	Chr2:19319855-19319963
161	Aly-miR408	Arabis lyrata	ACAGGGAACAAGCAGAGCAUG	AUGCACUGCCUCUUCCCUGGC	GAUAGAGAGAGACAGGGAACAAGCAGAGCAUGGAUUGAGUUUACUAAAACAUUAAACGACUCUGUUUUGUCUCUACCCAUGCACUGCCUCUUCCCUGGCUCCCUCUUUU	+	scaffold_4:22869889-22869997
162	Brni-miR408	Brassica nigra	ACGGGGAACAAGCAGAGCAUG	AUGCACUGCCUCUUCCCUGGC	GAAAGAGGGAGCCAGGGAAGAGGCAGTGCATGGGAAGAGACCAAACATAGTCATCTGATGTTTTGGTAAATACTCAATCCATGCTCTGCTTGTTCCCCGTCTCTCTCTGTT	-	CM004494.1:17876039-17876149
163	Bra-miR408	Brassica rapa	ACAGGGAACAAGCAGAGCAUG	AUGCACUGCCUCUUCCCUGGC	AUCAGAGAGAGACAGGGAACAAGCAGAGCAUGGAUUGAGUUUUUACCAAAACAUCAAAUGACUAUGUUUGGUCUCUUCCCAUGCACUGCCUCUUCCCUGGCUCCCUCCUCU	-	A05:495970-496080
164	Bol-miR408a	Brassica oleracea	ACAGGGAACAAGCAGAGCAUG	AUGCACUGCCUCUUCCCUGGC	ACGAGAGAGAGACAGGGAACAAGCAGAGCAUGGAUCGAGUUUUUACCAAAACAUCAAAUGACUAUGUUUGGUCUCUUCCCAUGCACUGCCUCUUCCCUGGCUCCCUGUUUC	-	C4:550593-550703
165	Bol-miR408b	Brassica oleracea	ACAGGGAACAAGCAGAGCAUG	AUGCACUGCCUCUUCCCUGGC	ACCAGAGAGAGACAGGGAACAAGCAGAGCAUGGAUUGAGUUUUUACCAAAACAUCAAAUGACUAUGUUUGGUCUCUUCCCAUGCACUGCCUCUUCCCUGGCUCCCUCUUUC	-	C8:24813059-24813169
166	Bju-miR408a	Brassica_juncea	ACAGGGAACAAGCAGAGCAUG	UGCACUGCCUCUUCCCUGGCU	AUCAGAGAGAGACAGGGAACAAGCAGAGCAUGGAUUGAGUUUUUACCAAAACAUCAAAUGACUAUGUUUGGUCUCUUCCCAUGCACUGCCUCUUCCCUGGCUCCCUCCUCUU	-	CM007189.1:422633-422744
167	Bju-miR408b	Brassica_juncea	ACGGGGAACAAGCAGAGCAUG	UGCACUGCCUCUUCCCUGGCU	AACAGAGAGAGACGGGGAACAAGCAGAGCAUGGAUUGAGUAUUUACCAAAACAUCAGAUGACUAUGUUUGGUCUCUUCCCAUGCACUGCCUCUUCCCUGGCUCCCUCUUUCU	+	CM007198.1:1288981-1289092
168	Bna-miR408a	Brassica_napus	ACAGGGAACAAGCAGAGCAUG	UGCACUGCCUCUUCCCUGGCU	ACCAGAGAGAGACAGGGAACAAGCAGAGCAUGGAUUGAGUUUUUACCAAAACAUCAAAUGACUAUGUUUGGUCUCUUCCCAUGCACUGCCUCUUCCCUGGCUCCCUCCUCUU	-	chrA05:478987-479098
169	Bna-miR408b	Brassica_napus	ACAGGGAACAAGCAGAGCAUG	UGCACUGCCUCUUCCCUGGCU	ACGAGAGAGAGACAGGGAACAAGCAGAGCAUGGAUCGAGUUUUUACCAAAACAUCAAAUGACUAUGUUUGGUCUCUUCCCAUGCACUGCCUCUUCCCUGGCUCCCUGUUUCU	-	chrC04:375353-375464
170	Bna-miR408c	Brassica_napus	ACAGGGAACAAGCAGAGCAUG	UGCACUGCCUCUUCCCUGGCU	CAGAGAGAGAGACAGGGAACAAGCAGAGCAUGGAUUGAGUUUUUACCAAAACAUCAAAUGACUAUGUUUGGUCUCUUCCCAUGCACUGCCUCUUCCCUGGCUCCCUUUUUCU	-	chrCnn_random:8448081-8448192
171	Bna-miR408d	Brassica_napus	ACAGGGAACAAGCAGAGCAUG	UGCACUGCCUCUUCCCUGGCU	CAGAGAGAGAGACAGGGAACAAGCAGAGCAUGGAUUGAGUUUUUACCAAAACAUCAAAUGACUAUGUUUGGUCUCUUCCCAUGCACUGCCUCUUCCCUGGCUCCCUUUUUCU	-	chrCnn_random:8449686-8449797
172	Casa-miR408	Camelina sativa		AUGCACUGCCUCUUCCCUGGC	GAGAUAGACAGGGAACAAGCAGAGCAUGGAUUGAGUUUACUAAAACACUAAACGACUUUUGUCUCUACCCAUGCACUGCCUCUUCCCUGGCUCUUUC
173	Cru-miR408	Capsella_rubella	ACAGGGAACAAGCAGAGCAUG	AUGCACUGCCUCUUCCCUGGC	UAAUGAGAUAGACAGGGAACAAGCAGAGCAUGGAUUGAGUUUACUAAAACACUAUACCACUGUGUUUUGUCUCUACCCAUGCACUGCCUCUUCCCUGGCUCUCCCUCUU	+	scaffold_4:14640178-14640286
174	Cpa-miR408	Carica_papaya	CUGGGAAGAGGCAGAGCAUGG	CUGCACUGCCUCUUCCCUGGC	AGAGACACAGGCUGGGAAGAGGCAGAGCAUGGAUGGAGUCAUUAACAAUAUACCCUUCUGUUUUUGGUUCUACCCCUGCACUGCCUCUUCCCUGGCUCUCUCUUUU	-	supercontig_812:11458-11563
175	Tca-miR408	Theobroma_cacao	ACAGGGAACAGGCUGAGCAUG	AUGCACUGCCUCUUCCCUGGC	GACAGACAAAGACAGGGAACAGGCUGAGCAUGGAUGAAUCUACCAACAGGUUUCUGUUGUCGAUCCGCCCAUGCACUGCCUCUUCCCUGGCUCUGCCUCUU	-	scaffold_1:34189648-34189748
176	Gba-miR408a	Gossypium barbadense	CAGGGAACAGGCUGAGCAUGG	AUGCACUGCCUCUUCCCUGGC	UGGGAGAGACAGACAAAGACAGGGAACAGGCUGAGCAUGGAUGGAUCUACCAACUGAUUCUGUUGUUUCUCCGCCCAUGCACUGCCUCUUCCCUGGCUCUGCCUCCU	-	Gbar_A11:10386164-10386270
177	Gba-miR408b	Gossypium barbadense	CAGGGAACAGGCUGAGCAUGG	AUGCACUGCCUCUUCCCUGGC	UGGGAGAGACAGACAAAGACAGGGAACAGGCUGAGCAUGGAUGGAUCUACCAACUGAUUCUGUUGUUUCUCCGCCCAUGCACUGCCUCUUCCCUGGCUCUGCCUCCU	-	Gbar_D11:9586700-9586806
178	Gar-miR408	Gossypium_arboreum	ACAGGGAACAGGCUGAGCAUG	AUGCACUGCCUCUUCCCUGGC	GACAGACAAAGACAGGGAACAGGCUGAGCAUGGAUGGAUCUACCAACUGAUUCUGUUGUUUCUCCGCCCAUGCACUGCCUCUUCCCUGGCUCUGCCUCCU	+	CA_chr4_BGI-A2_v1.0:136571502-136571601
179	Gra-miR408	Gossypium_raimondii	ACAGGGAACAGGCUGAGCAUG	UGCACUGCCUCUUCCCUGGCU	GACAGACAAAGACAGGGAACAGGCUGAGCAUGGAUGGAUCUACCAACUGAUUCUGUUGUUUCUCCGCCCAUGCACUGCCUCUUCCCUGGCUCUGCCUCCUC	-	Chr07:9106561-9106661
180	Hsy-miR408a	Hibiscus_syriacus	CAGGGAACAGGCUGAGCAUGG	UGCACUGCCUCUUCCCUGGCU	CAGACGAAAGACAGGGAACAGGCUGAGCAUGGAUGGCUCUAACCGACAGCUUUCUGUUGUUUCUCCGCCCAUGCACUGCCUCUUCCCUGGCUCUGCCACCUC	+	MBGJ01000048.1:435248-435349
181	Hsy-miR408b	Hibiscus_syriacus	CAGGGAACAGGCUGAGCAUGG	UGCACUGCCUCUUCCCUGGCU	ACAGACAAAGACAGGGAACAGGCUGAGCAUGGAUGGAUCUACCAACAGAUUCUGUUGUUUCUCCGCCCAUGCACUGCCUCUUCCCUGGCUCCGCCUCCUC	-	MBGJ01000980.1:75594-75693
182	Hsy-miR408c	Hibiscus_syriacus	ACAGGGAAGAGGCUGAGCAUG	UGCACUGCCUCUUCCCUGGCU	GCAGACGAAAGACAGGGAAGAGGCUGAGCAUGGAUGGCUCUAACCAACAGCUUUCUGUUGUUUCUCCGCUCAUGCACUGCCUCUUCCCUGGCUCUCCCACCUC	-	MBGJ01003275.1:157955-158057
