# Supplementary material for: Gma-miR408 Enhances Soybean Cyst Nematode Susceptibility by Suppressing Reactive Oxygen Species Accumulation
Source: Int J Mol Sci. 2022 Nov 14;23(22):14022. doi: 10.3390/ijms232214022 (PMC9695887; doi:10.3390/ijms232214022)
Supplement: Supplementary file 1 [file ijms-23-14022-s001.zip › Table.S2.xlsx]

## Sheet: Sheet3
Table. S2 Taxonomic analyses of 182 precursors sequence from 118 species.
No	miRNA_ID	Species	Devision	Class	Clade	Order	Family	Genus
1	Ppa-miR408	Physcomitrella patens	Bryophyta	Bryopsida		Funariales	Funariaceae	Physcomitrella
2	Mpo-miR408a	Marchantia polymorpha	Marchantiophyta	Marchantiopsida		Marchantiales	Marchantiaceae	Marchantia
3	Mpo-miR408b	Marchantia polymorpha	Marchantiophyta	Marchantiopsida		Marchantiales	Marchantiaceae	Marchantia
4	Smo-miR408a	Selaginella moellendorffii	Lycopodiophyta	Lycopodiopsida		Selaginellales	Selaginellaceae	Selaginella
5	Smo-miR408b	Selaginella moellendorffii	Lycopodiophyta	Lycopodiopsida		Selaginellales	Selaginellaceae	Selaginella
6	Gbi-miR408	Ginkgo biloba	Ginkgophyta	Ginkgoopsida		Ginkgoales	Ginkgoaceae	Ginkgo
7	Pab-miR408	Picea abies	Coniferophyta	Coniferopsida		Pinales	Pinaceae	Picea
8	Pta-miR408	Pinus taeda	Coniferophyta	Coniferopsida		Pinales	Pinaceae	Pines
9	Atr-miR408	Amborella trichopoda	Angiosperms			Amborellales	Amborellaceae	Amborella
10	Pam-miR408	Persea americana	Angiosperms			Laurales	Lauraceae	Persea
11	Spo-miR408	Spirodela polyrhiza	Angiosperms	monocots		Alismatales	Araceae	Spirodela
12	Aof-miR408	Asparagus officinalis	Angiosperms	monocots		Asparagales	Asparagaceae	Asparagus
13	Deca-miR408	Dendrobium catenatum	Angiosperms	monocots		Asparagales	Orchidaceae	Dendrobium
14	Dof-miR408	Dendrobium officinale	Angiosperms	monocots		Asparagales	Orchidaceae	Dendrobium
15	Mac-miR408	Musa acuminata	Angiosperms	monocots	commelinids	Zingiberales	Musaceae	Musa
16	Cnu-miR408	Cocos nucifera	Angiosperms	monocots	commelinids	Arecales	Arecaceae	ocos
17	Egu-miR408	Elaeis guineensis	Angiosperms	monocots	commelinids	Arecales	Arecaceae	Elaeis
18	Aco-miR408	Ananas comosus	Angiosperms	monocots	commelinids	Poales	Bromeliaceae	Ananas
19	Vca-miR408	Vriesea carinata	Angiosperms	monocots	commelinids	Poales	Bromeliaceae	Vriesea
20	Ata-miR408	Aegilops tauschii	Angiosperms	monocots	commelinids	Poales	Poaceae	Aegilops
21	Bdi-miR408	Brachypodium distachyon	Angiosperms	monocots	commelinids	Poales	Poaceae	Oryza
22	Cam-miR408	Cenchrus americanus	Angiosperms	monocots	commelinids	Poales	Poaceae	Cenchrus
23	Oni-miR408c	Oryza sativa	Angiosperms	monocots	commelinids	Poales	Poaceae	Oryza
24	Osa-miR408a	Oryza glaberrima	Angiosperms	monocots	commelinids	Poales	Poaceae	Oryza
25	Osa-miR408b	Oryza nivara	Angiosperms	monocots	commelinids	Poales	Poaceae	Oryza
26	Ogl-miR408	Oryza nivara	Angiosperms	monocots	commelinids	Poales	Poaceae	Oryza
27	Oni-miR408a	Oryza nivara	Angiosperms	monocots	commelinids	Poales	Poaceae	Oryza
28	Oni-miR408b	Oryza rufipogon	Angiosperms	monocots	commelinids	Poales	Poaceae	Oryza
29	Oru-miR408	Oryza sativa	Angiosperms	monocots	commelinids	Poales	Poaceae	Oryza
30	Phe-miR408	Phyllostachys heterocycla	Angiosperms	monocots	commelinids	Poales	Poaceae	Phyllostachys
31	sof-miR408a	Saccharum officinarum	Angiosperms	monocots	commelinids	Poales	Poaceae	Saccharum
32	sof-miIR408b	Saccharum officinarum	Angiosperms	monocots	commelinids	Poales	Poaceae	Saccharum
33	sof-miR408c	Saccharum officinarum	Angiosperms	monocots	commelinids	Poales	Poaceae	Saccharum
34	sof-miR408d	Saccharum officinarum	Angiosperms	monocots	commelinids	Poales	Poaceae	Saccharum
35	sof-miIR408e	Saccharum officinarum	Angiosperms	monocots	commelinids	Poales	Poaceae	Saccharum
36	Sit-miR408	Setaria italica	Angiosperms	monocots	commelinids	Poales	Poaceae	Setaria
37	Sbi-miR408	Sorghum bicolor	Angiosperms	monocots	commelinids	Poales	Poaceae	Sorghum
38	Tae-miR408a	Triticum aestivum	Angiosperms	monocots	commelinids	Poales	Poaceae	Triticum
39	Tae-miR408b	Triticum aestivum	Angiosperms	monocots	commelinids	Poales	Poaceae	Triticum
40	Tae-miR408c	Triticum aestivum	Angiosperms	monocots	commelinids	Poales	Poaceae	Triticum
41	Tae-miR408d	Triticum aestivum	Angiosperms	monocots	commelinids	Poales	Poaceae	Triticum
42	Tae-miR408e	Triticum aestivum	Angiosperms	monocots	commelinids	Poales	Poaceae	Triticum
43	Tur-miR408	Triticum urartu	Angiosperms	monocots	commelinids	Poales	Poaceae	Triticum
44	Zma-miR408a	Zea mays	Angiosperms	monocots	commelinids	Poales	Poaceae	Zea
45	Zma-miR408b	Zea mays	Angiosperms	monocots	commelinids	Poales	Poaceae	Zea
46	Zma-miR408c	Zea mays	Angiosperms	monocots	commelinids	Poales	Poaceae	Zea
47	Aca-miR408	Aquilegia coerulea	Angiosperms	dicots		Ranunculales	Ranunculaceae	Aquilegia
48	Nnu-miR408a	Nelumbo nucifera	Angiosperms	dicots		Proteales	Nelumbonaceae	Nelumbo
49	Nnu-miR408b	Nelumbo nucifera	Angiosperms	dicots		Proteales	Nelumbonaceae	Nelumbo
50	Cqu-miR408a	Chenopodium quinoa	Angiosperms	dicots		Caryophyllales	Amaranthaceae	Chenopodium
51	Cqu-miR408b	Chenopodium quinoa	Angiosperms	dicots		Caryophyllales	Amaranthaceae	Chenopodium
52	Cqu-miR408c	Chenopodium quinoa	Angiosperms	dicots		Caryophyllales	Amaranthaceae	Chenopodium
53	Bvu-miR408	Beta vulgaris	Angiosperms	dicots		Caryophyllales	Amaranthaceae	Beta
54	Fes-miR408	Fagopyrum esculentum	Angiosperms	dicots		Caryophyllales	Polygonaceae	Fagopyrum
55	Ach-miR408a	Actinidia chinensis	Angiosperms	dicots		Ericales	Actinidiaceae	Actinidia
56	Ach-miR408b	Actinidia chinensis	Angiosperms	dicots		Ericales	Actinidiaceae	Actinidia
57	Ach-miR408c	Actinidia chinensis	Angiosperms	dicots		Ericales	Actinidiaceae	Actinidia
58	Csi-miR408a	Camellia sinensis	Angiosperms	dicots		Ericales	Theaceae	Camellia
59	Csi-miR408b	Camellia sinensis	Angiosperms	dicots		Ericales	Theaceae	Camellia
60	Daca-miR408	Daucus carota	Angiosperms	dicots	Campanulids	Apiales	Apiaceae	Daucus
61	Pno-miR408	Panax notoginseng	Angiosperms	dicots	Campanulids	Apiales	Araliaceae	Panax
62	Cyca-miR408	Cynara cardunculus	Angiosperms	dicots	Campanulids	Asterales	Asteraceae	Cynara
63	Han-miR408	Helianthus annuus	Angiosperms	dicots	Campanulids	Asterales	Asteraceae	Helianthus
64	Lsa-miR408	Lactuca sativa	Angiosperms	dicots	Campanulids	Asterales	Asteraceae	Lactuca
65	Cro-miR408	Catharanthus roseus	Angiosperms	dicots	lamiids	Gentianales	Apocynaceae	Catharanthus
66	Car-miR408a	Coffea arabica	Angiosperms	dicots	lamiids	Gentianales	Rubiaceae	Coffea
67	Car-miR408b	Coffea arabica	Angiosperms	dicots	lamiids	Gentianales	Rubiaceae	Coffea
68	Car-miR408c	Coffea arabica	Angiosperms	dicots	lamiids	Gentianales	Rubiaceae	Coffea
69	Car-miR408d	Coffea arabica	Angiosperms	dicots	lamiids	Gentianales	Rubiaceae	Coffea
70	Car-miR408e	Coffea arabica	Angiosperms	dicots	lamiids	Gentianales	Rubiaceae	Coffea
71	Car-miR408f	Coffea arabica	Angiosperms	dicots	lamiids	Gentianales	Rubiaceae	Coffea
72	Car-miR408g	Coffea arabica	Angiosperms	dicots	lamiids	Gentianales	Rubiaceae	Coffea
73	Ama-miR408	Antirrhinum majus	Angiosperms	dicots	lamiids	Lamiales	Plantaginaceae	Antirrhinum
74	Dpr-miR408	Digitalis purpurea	Angiosperms	dicots	lamiids	Lamiales	Plantaginaceae	Digitalis
75	Pca-miR408a	Pogostemon cablin	Angiosperms	dicots	lamiids	Lamiales	Lamiaceae	Pogostemon
76	Pca-miR408b	Pogostemon cablin	Angiosperms	dicots	lamiids	Lamiales	Lamiaceae	Pogostemon
77	Pca-miR408c	Pogostemon cablin	Angiosperms	dicots	lamiids	Lamiales	Lamiaceae	Pogostemon
78	Smi-miR408a	Salvia miltiorrhiza	Angiosperms	dicots	lamiids	Lamiales	Lamiaceae	Salvia
79	Smi-miR408b	Salvia miltiorrhiza	Angiosperms	dicots	lamiids	Lamiales	Lamiaceae	Salvia
80	Can-miR408a	Capsicum annuum	Angiosperms	dicots	lamiids	Solanales	Solanaceae	Capsicum
81	Can-miR408b	Capsicum annuum	Angiosperms	dicots	lamiids	Solanales	Solanaceae	Capsicum
82	Cuca-miR408	Cuscuta campestris	Angiosperms	dicots	Lamiids	Solanales	Convolvulaceae	Cuscuta
83	Iba-miR408a	Ipomoea batatas	Angiosperms	dicots	lamiids	Solanales	Convolvulaceae	Ipomoea
84	Iba-miR408b	Ipomoea batatas	Angiosperms	dicots	lamiids	Solanales	Convolvulaceae	Ipomoea
85	Iba-miR408c	Ipomoea batatas	Angiosperms	dicots	lamiids	Solanales	Convolvulaceae	Ipomoea
86	Iba-miR408d	Ipomoea batatas	Angiosperms	dicots	lamiids	Solanales	Convolvulaceae	Ipomoea
87	Nta-miR408a	Nicotiana benthamiana	Angiosperms	dicots	lamiids	Solanales	Solanaceae	Nicotiana
88	Nta-miR408b	Nicotiana benthamiana	Angiosperms	dicots	lamiids	Solanales	Solanaceae	Nicotiana
89	Nbe-miR408a	Nicotiana tabacum	Angiosperms	dicots	lamiids	Solanales	Solanaceae	Nicotiana
90	Nbe-miR408b	Nicotiana tabacum	Angiosperms	dicots	lamiids	Solanales	Solanaceae	Nicotiana
91	Sly-miR408a	Solanum lycopersicum	Angiosperms	dicots	lamiids	Solanales	Solanaceae	Solanum
92	Sly-miR408b	Solanum lycopersicum	Angiosperms	dicots	lamiids	Solanales	Solanaceae	Solanum
93	Sme-miR408	Solanum melongena	Angiosperms	dicots	lamiids	Solanales	Solanaceae	Solanum
94	Spi-miR408a	Solanum pimpinellifolium	Angiosperms	dicots	lamiids	Solanales	Solanaceae	Solanum
95	Spi-miR408b	Solanum pimpinellifolium	Angiosperms	dicots	lamiids	Solanales	Solanaceae	Solanum
96	Stu-miR408a	Solanum tuberosum	Angiosperms	dicots	lamiids	Solanales	Solanaceae	Solanum
97	Stu-miR408b	Solanum tuberosum	Angiosperms	dicots	lamiids	Solanales	Solanaceae	Solanum
98	Vvi-miR408	Vitis vinifera	Angiosperms	dicots		Vitales	Vitaceae	Vitis
99	Hbr-miR408a	Hevea brasiliensis	Angiosperms	dicots	fabids	Malpighiales	Euphorbiaceae	Hevea
100	Hbr-miR408b	Hevea brasiliensis	Angiosperms	dicots	fabids	Malpighiales	Euphorbiaceae	Hevea
101	Jcu-miR408a	Jatropha curcas	Angiosperms	dicots	fabids	Malpighiales	Euphorbiaceae	Jatropha
102	Jcu-miR408b	Jatropha curcas	Angiosperms	dicots	fabids	Malpighiales	Euphorbiaceae	Jatropha
103	Lus-miR408	Linum usitatissimum	Angiosperms	dicots	fabids	Malpighiales	Linaceae	Linum
104	Mes-miR408a	Manihot esculenta	Angiosperms	dicots	fabids	Malpighiales	Euphorbiaceae	Manihot
105	Mes-miR408b	Manihot esculenta	Angiosperms	dicots	fabids	Malpighiales	Euphorbiaceae	Manihot
106	Rco-miR408	Ricinus communis	Angiosperms	dicots	fabids	Malpighiales	Euphorbiaceae	Ricinus
107	Ptr-miR408	Populus trichocarpa	Angiosperms	dicots	fabids	Malpighiales	Salicaceae	Populus
108	Cfo-miR408	Cephalotus follicularis	Angiosperms	dicots	fabids	Oxalidales	Cephalotaceae	Cephalotus
109	Ahy-miR408	Arachis duranensis	Angiosperms	dicots	fabids	Fabales	Fabaceae	Arachis
110	Adu-miR408	Arachis hypogaea	Angiosperms	dicots	fabids	Fabales	Fabaceae	Arachis
111	Aip-miR408	Arachis ipaensis	Angiosperms	dicots	fabids	Fabales	Fabaceae	Arachis
112	Amo-miR408a	Arachis monticola	Angiosperms	dicots	fabids	Fabales	Fabaceae	Arachis
113	Amo-miR408b	Arachis monticola	Angiosperms	dicots	fabids	Fabales	Fabaceae	Arachis
114	Cca-miR408a	Cajanus cajan	Angiosperms	dicots	fabids	Fabales	Fabaceae	Cajanus
115	Cca-miR408b	Cajanus cajan	Angiosperms	dicots	fabids	Fabales	Fabaceae	Cajanus
116	Ciar-miR408	Cicer arietinum	Angiosperms	dicots	fabids	Fabales	Fabaceae	Cicer
117	Gma-miR408a	Glycine max	Angiosperms	dicots	fabids	Fabales	Fabaceae	Glycine
118	Gma-miR408b	Glycine max	Angiosperms	dicots	fabids	Fabales	Fabaceae	Glycine
119	Gma-miR408c	Glycine max	Angiosperms	dicots	fabids	Fabales	Fabaceae	Glycine
120	Gma-miR408d	Glycine max	Angiosperms	dicots	fabids	Fabales	Fabaceae	Glycine
121	Gso-miR408a	Glycine soja	Angiosperms	dicots	fabids	Fabales	Fabaceae	Glycine
122	Gso-miR408b	Glycine soja	Angiosperms	dicots	fabids	Fabales	Fabaceae	Glycine
123	Gso-miR408c	Glycine soja	Angiosperms	dicots	fabids	Fabales	Fabaceae	Glycine
124	Gso-miR408d	Glycine soja	Angiosperms	dicots	fabids	Fabales	Fabaceae	Glycine
125	Lja-miR408	Lotus japonicus	Angiosperms	dicots	fabids	Fabales	Fabaceae	Lotus
126	Lan-miR408a	Lupinus angustifolius	Angiosperms	dicots	fabids	Fabales	Fabaceae	Lupinus
127	Lan-miR408b	Lupinus angustifolius	Angiosperms	dicots	fabids	Fabales	Fabaceae	Lupinus
128	Mtr-miR408	Medicago truncatula	Angiosperms	dicots	fabids	Fabales	Fabaceae	Medicago
129	Pvu-miR408a	Phaseolus vulgaris	Angiosperms	dicots	fabids	Fabales	Fabaceae	Phaseolus
130	Pvu-miR408b	Phaseolus vulgaris	Angiosperms	dicots	fabids	Fabales	Fabaceae	Phaseolus
131	Vun-miR408	Vigna radiata	Angiosperms	dicots	fabids	Fabales	Fabaceae	Vigna
132	Vra-miR408a	Vigna radiata	Angiosperms	dicots	fabids	Fabales	Fabaceae	Vigna
133	Vra-miR408b	Vigna unguiculata	Angiosperms	dicots	fabids	Fabales	Fabaceae	Vigna
134	Cla-miR408	Citrullus lanatus	Angiosperms	dicots	Fabids	Cucurbitales	Cucurbitaceae	Citrullus
135	Cme-miR408	Cucumis melo	Angiosperms	dicots	Fabids	Cucurbitales	Cucurbitaceae	Cucumis
136	Csa-miR408	Cucumis sativus	Angiosperms	dicots	Fabids	Cucurbitales	Cucurbitaceae	Cucumis
137	Cma-miR408	Cucurbita maxima	Angiosperms	dicots	Fabids	Cucurbitales	Cucurbitaceae	Cucurbita
138	Cmo-miR408	Cucurbita moschata	Angiosperms	dicots	Fabids	Cucurbitales	Cucurbitaceae	Cucurbita
139	Lsi-miR408	Lagenaria siceraria	Angiosperms	dicots	Fabids	Cucurbitales	Cucurbitaceae	Lagenaria
140	Jre-miR408	Juglans regia	Angiosperms	dicots	Fabids	Fagales	Juglandaceae	Juglans
141	Boni-miR408	Boehmeria nivea	Angiosperms	dicots	fabids	Rosales	Urticaceae	Boehmeria
142	Fan-miR408	Fragaria ananassa	Angiosperms	dicots	fabids	Rosales	Rosaceae	Fragaria
143	Fve-miR408	Fragaria vesca	Angiosperms	dicots	fabids	Rosales	Rosaceae	Fragaria
144	Mdo-miR408a	Malus domestica	Angiosperms	dicots	fabids	Rosales	Rosaceae	Malus
145	Mdo-miR408b	Malus domestica	Angiosperms	dicots	fabids	Rosales	Rosaceae	Malus
146	Mno-miR408	Morus notabilis	Angiosperms	dicots	fabids	Rosales	Moraceae	Morus
147	Pav-miR408	Prunus avium	Angiosperms	dicots	fabids	Rosales	Rosaceae	Prunus
148	Pdu-miR408	Prunus dulcis	Angiosperms	dicots	fabids	Rosales	Rosaceae	Prunus
149	Ppe-miR408	Prunus persica	Angiosperms	dicots	fabids	Rosales	Rosaceae	Prunus
150	Pbr-miR408	Pyrus bretschneideri	Angiosperms	dicots	fabids	Rosales	Rosaceae	Prunus
151	Zju-miR408	Ziziphus jujuba	Angiosperms	dicots	fabids	Rosales	Rhamnaceae	Ziziphus
152	Hlu-miR408a	Humulus lupulus	Angiosperms	dicots	fabids	Rosales	Cannabaceae	Humulus
153	Hlu-miR408b	Humulus lupulus	Angiosperms	dicots	fabids	Rosales	Cannabaceae	Humulus
154	Pgr-miR408	Punica granatum	Angiosperms	dicots	malvids	Myrtales	Lythraceae	Punica
155	Cgr-miR408	Citrus grandis	Angiosperms	dicots	malvids	Sapindales	Rutaceae	Citrus
156	Cre-miR408	Citrus reticulata	Angiosperms	dicots	malvids	Sapindales	Rutaceae	Citrus
157	Cisi-miR408	Citrus sinensis	Angiosperms	dicots	malvids	Sapindales	Rutaceae	Citrus
158	Lch-miR408a	Litchi chinensis	Angiosperms	dicots	malvids	Sapindales	Sapindaceae	Litchi
159	Lch-miR408b	Litchi chinensis	Angiosperms	dicots	malvids	Sapindales	Sapindaceae	Litchi
160	Ath-miR408	Arabidopsis thaliana	Angiosperms	dicots	malvids	Brassicales	Brassicaceae	Arabidopsis
161	Aly-miR408	Arabis lyrata	Angiosperms	dicots	malvids	Brassicales	Brassicaceae	Arabis
162	Brni-miR408	Brassica juncea	Angiosperms	dicots	malvids	Brassicales	Brassicaceae	Brassica
163	Bra-miR408	Brassica juncea	Angiosperms	dicots	malvids	Brassicales	Brassicaceae	Brassica
164	Bol-miR408a	Brassica napus	Angiosperms	dicots	malvids	Brassicales	Brassicaceae	Brassica
165	Bol-miR408b	Brassica napus	Angiosperms	dicots	malvids	Brassicales	Brassicaceae	Brassica
166	Bju-miR408a	Brassica napus	Angiosperms	dicots	malvids	Brassicales	Brassicaceae	Brassica
167	Bju-miR408b	Brassica napus	Angiosperms	dicots	malvids	Brassicales	Brassicaceae	Brassica
168	Bna-miR408a	Brassica nigra	Angiosperms	dicots	malvids	Brassicales	Brassicaceae	Brassica
169	Bna-miR408b	Brassica rapa	Angiosperms	dicots	malvids	Brassicales	Brassicaceae	Brassica
170	Bna-miR408c	Brassica oleracea	Angiosperms	dicots		Brassicales	Brassicaceae	Brassica
171	Bna-miR408d	Brassica oleracea	Angiosperms	dicots	malvids	Brassicales	Brassicaceae	Brassica
172	Casa-miR408	Camelina sativa	Angiosperms	dicots	malvids	Brassicales	Brassicaceae	Camelina
173	Cru-miR408	Capsella rubella	Angiosperms	dicots	malvids	Brassicales	Brassicaceae	Capsella
174	Cpa-miR408	Carica papaya	Angiosperms	dicots	malvids	Brassicales	Caricaceae	Carica
175	Tca-miR408	Theobroma cacao	Angiosperms	dicots	malvids	Malvales	Malvaceae	Theobroma
176	Gba-miR408a	Gossypium arboreum	Angiosperms	dicots	malvids	Malvales	Malvaceae	Gossypium
177	Gba-miR408b	Gossypium barbadense	Angiosperms	dicots	malvids	Malvales	Malvaceae	Gossypium
178	Gar-miR408	Gossypium barbadense	Angiosperms	dicots	malvids	Malvales	Malvaceae	Gossypium
179	Gra-miR408	Gossypium raimondii	Angiosperms	dicots	malvids	Malvales	Malvaceae	Gossypium
180	Hsy-miR408a	Hibiscus syriacus	Angiosperms	dicots	malvids	Malvales	Malvaceae	Gossypium
181	Hsy-miR408b	Hibiscus syriacus	Angiosperms	dicots	malvids	Malvales	Malvaceae	Hibiscus
182	Hsy-miR408c	Hibiscus syriacus	Angiosperms	dicots	malvids	Malvales	Malvaceae	Hibiscus
