# Supplementary material for: Gma-miR408 Enhances Soybean Cyst Nematode Susceptibility by Suppressing Reactive Oxygen Species Accumulation
Source: Int J Mol Sci. 2022 Nov 14;23(22):14022. doi: 10.3390/ijms232214022 (PMC9695887; doi:10.3390/ijms232214022)
Supplement: Supplementary file 1 [file ijms-23-14022-s001.zip › Table.S3.xlsx]

## Sheet: Sheet1
Table S3 Primers used in this study.
Primer	Forward	Reverse	Notes
ap	ATCCAGTCGAGCCTATCTAGTGAG	CCTCATCCTTGTCGACAACATCC	clone
bp	GCTCATGGATTCAATTTCAAGGCAC	CCTGTCTCTTCCTGTTAACTCCCT
cp	CTCCCGCAGTCAATGTTACAACT	ACCTCATACTTGTCGACAACATCTG
dp	GACAACGAACGAATTCGCGT	GAGACAGAGCCAGGGAAGAGG
ap-i	GGCCAGTGCCAAGCTATCCAGTCGAGCCTATCTAGTGAGAG	ACCATGGTCATCTAGCCTCATCCTTGTCGACAACATCC	adding base arms
bp-i	GGCCAGTGCCAAGCTGCTCATGGATTCAATTTCAAGGCACT	ACCATGGTCATCTAGCCTGTCTCTTCCTGTTAACTCCCT
cp-i	GGCCAGTGCCAAGCTCTCCCGCAGTCAATGTTACAACTG	ACCATGGTCATCTAGACCTCATACTTGTCGACAACATCTGAA
dp-i	GGCCAGTGCCAAGCTGACAACGAACGAATTCGCGTTG	ACCATGGTCATCTAGGAGACAGAGCCAGGGAAGAGG
GUS-JC	TAAGTTGGGTAACGCCAGGGT	CCTCATCCTTGTCGACAACATCC	positive plasmids detection
EGFP	ATGGTGAGCAAGGGCGA	TTACTTGTACAGCTCGTCCATGCC
JC	CGAGAGATATTGCTCAGATCTGTTAGC	TTCACAGTTCGATAGCGAAAACCG
U6	GGAACGATACAGAGAAGATTAGCA	GTCGTATCCAGTGCAGGGT	qPCR detection
miR408	CGCGATGCACTGCCTCTTC	AGTGCAGGGTCCGAGGTATT
