# Supplementary material for: Gma-miR408 Enhances Soybean Cyst Nematode Susceptibility by Suppressing Reactive Oxygen Species Accumulation
Source: Int J Mol Sci. 2022 Nov 14;23(22):14022. doi: 10.3390/ijms232214022 (PMC9695887; doi:10.3390/ijms232214022)
Supplement: Supplementary file 1 [file ijms-23-14022-s001.zip › Table.S4.xlsx]

## Sheet: Sheet1
Table.S4 The promoter of miR408 and STTM-miR408 sequences were synthesized.
Name	Sequence	Note
pre-miR408	GGCGCGCCGAGACAGGACAAAGCAGGGGAACAGGCAGAGCATGGATGGAGCTATCAACACAATATTGTCAAGAAACTGAGAGTGAGAGGAGAAATATGTTGTGGTTCTGCTCATGCACTGCCTCTTCCCTGGCTCTGTCTCCCTAGG	adding restriction enzyme sites Asc Ⅰand AvR Ⅱ
STTM-miR408	GGCGCGCCGCCAGGGAAGACTAGGCAGTGCATGTTGTTGTTGTTATGGTCTAATTTAAATATGGTCTAAAGAAGAAGAATGCCAGGGAAGACTAGGCAGTGCATCCTAGG
