# Supplementary material for: Gma-miR408 Enhances Soybean Cyst Nematode Susceptibility by Suppressing Reactive Oxygen Species Accumulation
Source: Int J Mol Sci. 2022 Nov 14;23(22):14022. doi: 10.3390/ijms232214022 (PMC9695887; doi:10.3390/ijms232214022)
Supplement: Supplementary file 1 [file ijms-23-14022-s001.zip › Table.S5.xlsx]

## Sheet: Sheet1
Table S5 Significant differentially expressed genes (DEGs) in the comparison of EV vs OE.
GeneID	length	FPKM-M EV	FPKM-M OE	Count-M EV	Count-M OE	log2Ratio	Regulation	P-value	padj	KOG	Annotation
GLYMA_06G122600	3294	45.2667	419.293	1408.33	14537.7	3.27238	up	3.79133e-121	1.29482e-116	At1g77120	K18857 alcohol dehydrogenase class-P [EC:1.1.1.1] | (RefSeq) alcohol dehydrogenase 1 isoform X2 (A)
GLYMA_17G153000	6389	1.71333	28.2633	110.667	2042.33	4.10451	up	4.11071e-108	7.01945e-104	At4g18010	K24221 type I inositol polyphosphate 5-phosphatase IP5P1/2 [EC:3.1.3.56] | (RefSeq) type I inositol polyphosphate 5-phosphatase 2 (A)
GLYMA_19G115300	3653	4.91	73.4333	168	2805.33	3.96146	up	9.24302e-106	1.05222e-101	At5g39890	K23953 plant cysteine oxidase [EC:1.13.11.-] | (RefSeq) plant cysteine oxidase 2 (A)
GLYMA_04G240800	2999	18.7	196.443	503	5876.67	3.4551	up	9.2206e-105	7.87255e-101	At1g77120	K18857 alcohol dehydrogenase class-P [EC:1.1.1.1] | (RefSeq) ADH2; alcohol dehydrogenase family protein (A)
GLYMA_05G179800	2904	7.61667	121.553	217.333	3889.67	4.05715	up	2.73418e-104	1.86755e-100	At5g65140	K01087 trehalose 6-phosphate phosphatase [EC:3.1.3.12] | (RefSeq) probable trehalose-phosphate phosphatase J (A)
GLYMA_02G259700	1311	0.826667	53.63	13.3333	960	6.07308	up	2.22716e-93	1.2677e-89	At3g05550	--
GLYMA_15G013300	1633	4.55667	44.5533	133	1454.33	3.35007	up	1.07394e-91	5.23958e-88	At1g80440	--
GLYMA_19G213100	1055	6.94333	113.007	122.333	2231	4.08448	up	6.59655e-90	2.81607e-86	At2g47520	K09286 EREBP-like factor | (RefSeq) uncharacterized protein LOC100527371 (A)
GLYMA_02G217800	2298	6.06667	93.98	146	2570.33	4.02114	up	7.28513e-88	2.76446e-84	At5g65640	K13422 transcription factor MYC2 | (RefSeq) transcription factor MYC1 (A)
GLYMA_04G183100	2925	2.47667	87.0133	69	2668.67	5.18771	up	7.55104e-86	2.57883e-82	At5g62520	--
GLYMA_17G117100	1159	4.06667	87.9033	51.6667	1224.33	4.48553	up	1.91511e-82	5.9459e-79	At5g25940	--
GLYMA_19G115600	3533	3.94667	72.5867	143	2941	4.25888	up	7.45075e-79	2.12048e-75	At5g39890	K23953 plant cysteine oxidase [EC:1.13.11.-] | (RefSeq) plant cysteine oxidase 2 (A)
GLYMA_17G117200	1050	0.923333	68.6733	11	918	6.27445	up	3.03001e-78	7.96008e-75	At5g25940	--
GLYMA_14G121200	3605	3.29667	30.87	121.667	1269.67	3.28952	up	8.14825e-78	1.98771e-74	At1g77120	K18857 alcohol dehydrogenase class-P [EC:1.1.1.1] | (RefSeq) alcohol dehydrogenase 1 (A)
GLYMA_04G213900	4167	4.99333	138.4	149.667	4716.67	4.85329	up	1.75302e-75	3.99128e-72	At1g77120	K18857 alcohol dehydrogenase class-P [EC:1.1.1.1] | (RefSeq) alcohol dehydrogenase (A)
GLYMA_01G182200	569	1.66333	69.42	17	796.333	5.44404	up	7.41556e-70	1.58285e-66	--	--
GLYMA_14G121400	2697	7.17	77.5567	237.667	2810	3.48944	up	1.50648e-68	3.02643e-65	At1g43800	K03921 acyl-[acyl-carrier-protein] desaturase [EC:1.14.19.2 1.14.19.11 1.14.19.26] | (RefSeq) SACPD-C; stearoyl-ACP desaturase (A)
GLYMA_18G064900	6194	6.16333	35.8167	538	3489.33	2.5975	up	2.00246e-68	3.79933e-65	At3g54140	K14638 solute carrier family 15 (peptide/histidine transporter), member 3/4 | (RefSeq) protein NRT1/ PTR FAMILY 8.1 (A)
GLYMA_05G182100	1367	3.82333	64.66	93.6667	1808.33	4.14735	up	2.1316e-65	3.83149e-62	--	--
GLYMA_13G163000	3568	4.90333	31.8367	184	1329.33	2.75712	up	1.06397e-63	1.81684e-60	At5g34940	K07964 heparanase [EC:3.2.1.166] | (RefSeq) heparanase-like protein 3 isoform X1 (A)
GLYMA_02G217600	10402	1.35	10.17	151.667	1277	2.97433	up	2.39788e-63	3.89963e-60	At5g64460	--
GLYMA_18G009700	4274	28.5833	169.907	1692	11331.7	2.63413	up	4.02069e-63	6.24157e-60	At1g13440	K00134 glyceraldehyde 3-phosphate dehydrogenase [EC:1.2.1.12] | (RefSeq) uncharacterized protein LOC100782924 (A)
GLYMA_02G157900	1466	0.913333	19.2667	20	474	4.46107	up	2.07094e-62	3.07507e-59	At3g05570	--
GLYMA_08G139800	1037	11.8867	160.897	220.667	3392.67	3.82247	up	3.65796e-61	5.20527e-58	--	--
GLYMA_05G094400	1026	66.6133	11.51	1223	235.667	-2.47258	down	6.06982e-61	8.29186e-58	At5g67080	K20716 mitogen-activated protein kinase kinase kinase 17/18 | (RefSeq) mitogen-activated protein kinase kinase kinase 18 (A)
GLYMA_10G063000	3668	1.65	28.79	60.3333	1199.33	4.19756	up	5.32728e-60	6.84954e-57	At2g36690	K24028 salicylic acid 3-hydroxylase [EC:1.14.11.-] | (RefSeq) protein DMR6-LIKE OXYGENASE 2 isoform X1 (A)
GLYMA_02G294000	2503	9.52333	59.19	314	2177.67	2.69407	up	5.41513e-60	6.84954e-57	At5g55180	K19891 glucan endo-1,3-beta-glucosidase 1/2/3 [EC:3.2.1.39] | (RefSeq) glucan endo-1,3-beta-glucosidase 3 isoform X1 (A)
GLYMA_08G145300	1782	5.12	119.307	125	3292.67	4.60241	up	6.78553e-60	8.27641e-57	At5g64750	K09286 EREBP-like factor | (RefSeq) APETALA2/ethylene responsive factor-like protein (A)
GLYMA_07G153100	3257	16.22	244.593	676	11280	3.97083	up	1.44686e-59	1.7039e-56	At5g54960	K01568 pyruvate decarboxylase [EC:4.1.1.1] | (RefSeq) pyruvate decarboxylase 2 (A)
GLYMA_06G300200	1491	156.767	12.9867	3511	333.667	-3.52184	down	2.66286e-59	3.0314e-56	At2g31180	K09422 transcription factor MYB, plant | (RefSeq) transcription factor MYB14 (A)
GLYMA_06G122700	3960	2.85333	20.9533	113.667	925.333	2.93252	up	2.86829e-58	3.15993e-55	At1g48880	K23877 xyloglucan O-acetyltransferase | (RefSeq) protein ALTERED XYLOGLUCAN 4 (A)
GLYMA_06G051900	1729	0.866667	24.7367	18.6667	589	4.8882	up	4.59631e-58	4.90541e-55	At5g56840	--
GLYMA_10G274100	981	1.04333	29.6333	18.3333	594.333	4.89788	up	1.3347e-57	1.38129e-54	At1g68500	--
GLYMA_02G157800	4978	6.56333	31.2233	317.667	1689.33	2.31244	up	4.97097e-57	4.99319e-54	At5g05140	--
GLYMA_13G147600	3848	1.53667	15.93	56.3333	652	3.43306	up	9.73613e-57	9.41651e-54	At2g36690	K24028 salicylic acid 3-hydroxylase [EC:1.14.11.-] | (RefSeq) protein DMR6-LIKE OXYGENASE 2 isoform X1 (A)
GLYMA_11G123300	903	3.16	111.353	51	2091.33	5.20987	up	9.92605e-57	9.41651e-54	At2g15960	--
GLYMA_17G180100	5450	87.07	14.16	6164.33	1117	-2.55866	down	2.72632e-56	2.51647e-53	At5g66900	K13457 disease resistance protein RPM1 | (RefSeq) disease resistance protein RPM1 (A)
GLYMA_15G084900	423	4.47667	90.7667	30.3333	703.333	4.4127	up	4.1462e-56	3.72634e-53	--	--
GLYMA_11G041600	6383	10.09	48.4433	861.667	4640.67	2.32523	up	4.48162e-56	3.92452e-53	At4g18010	K24221 type I inositol polyphosphate 5-phosphatase IP5P1/2 [EC:3.1.3.56] | (RefSeq) type I inositol polyphosphate 5-phosphatase 2 (A)
GLYMA_14G116400	3579	84.7533	8.38667	3997.33	450	-3.26954	down	1.30828e-55	1.11701e-52	At2g25460	--
GLYMA_12G218300	923	7.78	99.1667	128.667	1842.33	3.73245	up	3.18451e-55	2.65262e-52	At4g10270	--
GLYMA_15G091900	4194	9.68333	59.8633	219	1528	2.69122	up	1.07757e-54	8.76214e-52	At5g07220	--
GLYMA_11G060500	770	4.55667	131.547	63	2030	4.90825	up	2.19888e-53	1.74643e-50	--	--
GLYMA_20G070000	1854	11.0733	68.1967	368	2549.67	2.6867	up	2.48624e-53	1.92977e-50	At5g61600	K09286 EREBP-like factor | (RefSeq) ethylene-responsive transcription factor ERF105 (A)
GLYMA_14G185100	2541	2.04333	23.7233	61.6667	817.667	3.606	up	6.30195e-53	4.78276e-50	At5g65640	K13422 transcription factor MYC2 | (RefSeq) transcription factor MYC1 (A)
GLYMA_03G177500	3273	1.85333	26.9633	74.3333	1173.67	3.91085	up	3.37726e-52	2.5074e-49	At2g28550	K09284 AP2-like factor, euAP2 lineage | (RefSeq) APETALA2-like protein 3 (A)
GLYMA_16G062000	3993	0.69	16.02	20	508	4.59149	up	3.77323e-52	2.74177e-49	At3g27220	--
GLYMA_04G041200	1981	16.4667	148.827	562.667	5779.33	3.24106	up	1.18549e-51	8.4348e-49	At5g67190	K09286 EREBP-like factor | (RefSeq) ethylene-responsive transcription factor RAP2-1 isoform X1 (A)
GLYMA_13G261200	7843	32.72	117.96	1824	7381.33	1.91315	up	4.5601e-51	3.1783e-48	At1g53590	--
GLYMA_15G045600	2656	5.59	26.35	265.667	1407.67	2.3009	up	9.26298e-51	6.32698e-48	At1g11050	K13416 brassinosteroid insensitive 1-associated receptor kinase 1 [EC:2.7.10.1 2.7.11.1] | (RefSeq) somatic embryogenesis receptor-like kinase-like protein precursor (A)
GLYMA_06G104800	3176	0.53	9.75667	20.3333	425	4.26993	up	1.7178e-50	1.15032e-47	At5g65140	K01087 trehalose 6-phosphate phosphatase [EC:3.1.3.12] | (RefSeq) probable trehalose-phosphate phosphatase J isoform X2 (A)
GLYMA_05G059300	8102	164.95	29.5433	6245.33	1261	-2.41801	down	2.06876e-50	1.3587e-47	At2g35710	K22809 inositol phosphorylceramide glucuronosyltransferase 1 [EC:2.4.1.-] | (RefSeq) inositol phosphorylceramide glucuronosyltransferase 1 isoform X1 (A)
GLYMA_17G035400	3126	9.64667	45.0733	436.667	2274.67	2.28394	up	8.70482e-50	5.60919e-47	At5g49520	K18835 WRKY transcription factor 2 | (RefSeq) WRKY59; probable WRKY transcription factor 2 (A)
GLYMA_19G230600	3983	2.65333	14.5333	152.667	932	2.51211	up	1.60461e-49	1.01483e-46	At3g05640	K14803 protein phosphatase PTC2/3 [EC:3.1.3.16] | (RefSeq) probable protein phosphatase 2C 39 isoform X1 (A)
GLYMA_07G043100	4897	17.1333	98.9667	884.333	5795	2.5952	up	5.90035e-49	3.66379e-46	At3g14200	K09523 DnaJ homolog subfamily C member 3 | (RefSeq) dnaJ protein P58IPK homolog (A)
GLYMA_06G062100	3036	8.88667	64.1167	483	3894	2.90887	up	2.09176e-48	1.27568e-45	At5g25110	K07198 5'-AMP-activated protein kinase, catalytic alpha subunit [EC:2.7.11.11] | (RefSeq) CBL-interacting protein kinase 2 (A)
GLYMA_10G272000	3162	16.0533	1.56333	608	66.3333	-3.30068	down	4.80142e-47	2.87681e-44	At1g68390	--
GLYMA_04G236400	5261	4.29333	29.5	108	831.667	2.84226	up	6.53404e-47	3.84742e-44	At5g53420	--
GLYMA_01G234500	1751	27.3633	117.057	857.667	4068.67	2.15373	up	2.24026e-46	1.29677e-43	At1g64980	--
GLYMA_16G107300	6441	45.1233	162.08	2502.67	10056	1.90458	up	5.69448e-46	3.2413e-43	At5g45280	K19882 O-palmitoleoyl-L-serine hydrolase [EC:3.1.1.98] | (RefSeq) pectin acetylesterase 8 isoform X2 (A)
GLYMA_11G087300	7959	1.41	7.56333	143.333	852.333	2.48204	up	1.23808e-45	6.93163e-43	At5g65980	K24139 auxin efflux carrier family protein | (RefSeq) protein PIN-LIKES 7 (A)
GLYMA_15G011500	3599	37.2667	6.24	1553.67	291.667	-2.51308	down	1.58667e-45	8.73997e-43	At1g80300	K03301 ATP:ADP antiporter, AAA family | (RefSeq) ADP,ATP carrier protein 1, chloroplastic (A)
GLYMA_06G148400	2212	2.04333	31.0167	59.3333	1000.33	3.98072	up	2.40314e-45	1.30273e-42	At5g64750	K09286 EREBP-like factor | (RefSeq) ERF5; ethylene-responsive transcription factor RAP2-3-like (A)
GLYMA_01G131100	3825	5.89667	107.787	180.333	3641.67	4.24436	up	6.44192e-45	3.43757e-42	At2g30970	K14455 aspartate aminotransferase, mitochondrial [EC:2.6.1.1] | (RefSeq) aspartate aminotransferase, mitochondrial (A)
GLYMA_11G008400	1567	19.6933	88.15	552.333	2787.67	2.22638	up	9.73748e-45	5.11622e-42	At1g64980	--
GLYMA_18G050800	2845	6.41667	26.6	286.333	1321	2.11146	up	1.86876e-44	9.66996e-42	At2g30510	--
GLYMA_02G254600	2042	5.93	30.16	216.333	1224	2.40606	up	2.6415e-44	1.34645e-41	At2g39980	K19747 BAHD acyltransferase [EC:2.3.1.-] | (RefSeq) BAHD acyltransferase DCR (A)
GLYMA_10G200700	5138	54.5567	12.9367	2832	746.333	-2.01872	down	1.24185e-43	6.23703e-41	At5g04500	--
GLYMA_16G037600	3854	0.443333	10.7633	14.6667	394.333	4.65884	up	1.59536e-43	7.89632e-41	At5g39890	K23953 plant cysteine oxidase [EC:1.13.11.-] | (RefSeq) plant cysteine oxidase 2 (A)
GLYMA_11G077700	2054	33.5167	244.54	934	7455.67	2.91846	up	2.32161e-43	1.13268e-40	At4g36010	K12173 BRCA1-A complex subunit BRE | (RefSeq) BRISC and BRCA1-A complex member 2 (A)
GLYMA_19G212000	1223	1.69	15.1267	37	367.667	3.21806	up	2.70925e-43	1.30319e-40	At4g15970_2	K19038 E3 ubiquitin-protein ligase ATL41 [EC:2.3.2.27] | (RefSeq) RING-H2 finger protein ATL40 (A)
GLYMA_18G119200	1780	2.43	28.3467	74	964.333	3.59928	up	3.34027e-43	1.5844e-40	--	--
GLYMA_01G128100	3683	73.1033	4.85333	2899	217	-3.84888	down	3.9061e-43	1.82741e-40	At2g38470	K13424 WRKY transcription factor 33 | (RefSeq) WRKY5; probable WRKY transcription factor 33 isoform X1 (A)
GLYMA_20G068000	1015	8.83	55.3067	160.333	1136	2.71086	up	6.04902e-42	2.78119e-39	--	--
GLYMA_04G050700	4304	7.16667	41.8367	195.667	1296.33	2.61334	up	6.10768e-42	2.78119e-39	At5g11790	K18266 protein NDRG1 | (RefSeq) uncharacterized protein LOC100803300 (A)
GLYMA_01G017000	1480	20.0767	93.3667	462	2417.67	2.28021	up	9.65671e-42	4.33942e-39	At4g17940	--
GLYMA_04G156900	4304	3.50667	21.81	94	654	2.69679	up	1.54236e-41	6.84085e-39	At1g18490	K23953 plant cysteine oxidase [EC:1.13.11.-] | (RefSeq) plant cysteine oxidase 3 (A)
GLYMA_13G301600	720	1.37333	36.56	17.6667	550.333	4.81395	up	2.91619e-41	1.27684e-38	At4g10270	--
GLYMA_17G187300	4061	1.3	17.6567	37.6667	564.333	3.81816	up	3.75525e-41	1.62341e-38	At5g39890	K23953 plant cysteine oxidase [EC:1.13.11.-] | (RefSeq) uncharacterized protein LOC100819405 (A)
GLYMA_10G013700	6976	1.81667	13.3133	217	1822	2.94673	up	4.63801e-41	1.97996e-38	At3g62550	--
GLYMA_19G046400	3560	1.41333	7.98667	87.6667	554	2.56323	up	5.27881e-41	2.2257e-38	At4g05120	K15014 solute carrier family 29 (equilibrative nucleoside transporter), member 1/2/3 | (RefSeq) equilibrative nucleotide transporter 3 isoform X2 (A)
GLYMA_19G141200	4822	14.6267	57.4833	1054	4596.67	2.03379	up	6.44776e-41	2.68541e-38	At3g57550	K00942 guanylate kinase [EC:2.7.4.8] | (RefSeq) guanylate kinase 1 isoform X1 (A)
GLYMA_17G242900	6049	0.42	6.37	23.6667	402.333	3.98274	up	7.57998e-41	3.11893e-38	At5g42870	K15728 phosphatidate phosphatase LPIN [EC:3.1.3.4] | (RefSeq) phosphatidate phosphatase PAH2 (A)
GLYMA_13G151200	3531	37.9167	6.11333	1257	230.333	-2.56112	down	1.32273e-40	5.37783e-38	At5g03720	K09419 heat shock transcription factor, other eukaryote | (RefSeq) HSF-28; heat stress transcription factor A-3 (A)
GLYMA_13G301900	750	0.65	21.5133	8.66667	331	5.12888	up	5.55638e-40	2.23249e-37	At4g10270	--
GLYMA_18G208800	3606	9.66	0.86	514.333	52.3333	-3.4118	down	5.70906e-40	2.26716e-37	At2g38470	K13424 WRKY transcription factor 33 | (RefSeq) probable WRKY transcription factor 33 isoform X2 (A)
GLYMA_13G360600	1835	19.1367	78.12	628	2881.67	2.09061	up	6.40343e-40	2.51368e-37	At1g80440	--
GLYMA_06G277700	1040	2.92667	28.8633	54.6667	609.667	3.3687	up	7.47194e-40	2.89979e-37	At1g06340	--
GLYMA_01G019500	998	6.11667	45.7067	87.6667	740.333	2.96809	up	9.51027e-40	3.64938e-37	At5g65660	--
GLYMA_05G082500	5763	85.3533	14.4133	5882.33	1107.67	-2.50349	down	1.19728e-39	4.54329e-37	At5g66900	K13457 disease resistance protein RPM1 | (RefSeq) disease resistance protein RPM1 (A)
GLYMA_01G203200	1982	4.16	33.14	110	989.333	3.06181	up	1.24965e-39	4.68988e-37	At4g17670	--
GLYMA_03G189600	2115	1.13333	23.3567	43	967.667	4.4172	up	2.11676e-39	7.8578e-37	At3g10040	--
GLYMA_12G104800	1429	67.63	7.49333	1493.33	190	-3.10081	down	6.4395e-39	2.36475e-36	At2g31180	K09422 transcription factor MYB, plant | (RefSeq) transcription factor MYB30 isoform X1 (A)
GLYMA_16G212900	4611	16.31	55.1167	750.333	2818.67	1.81474	up	9.32927e-39	3.3895e-36	At1g65730	--
GLYMA_20G114200	2279	4.04333	37.4067	139.333	1405.67	3.2591	up	1.28927e-38	4.63486e-36	At2g30490	K00487 trans-cinnamate 4-monooxygenase [EC:1.14.14.91] | (RefSeq) C4H1; cinnamate 4-hydroxylase (A)
GLYMA_17G113900	5211	6.31333	35.7933	535	3342.33	2.55972	up	1.32641e-38	4.71872e-36	At5g25350	K14515 EIN3-binding F-box protein | (RefSeq) EIN3-binding F-box protein 1 (A)
GLYMA_11G019400	4360	36.63	8.32333	1288	326	-2.07773	down	1.94331e-38	6.84205e-36	At3g61600	--
GLYMA_09G276500	2260	2.94333	17.39	76.6667	501.667	2.62063	up	2.57152e-38	8.9615e-36	Hs7106299	K19323 ataxin-10 | (RefSeq) ataxin-10 (A)
GLYMA_08G137500	2951	21.8	116.94	655	4013.67	2.4913	up	4.19324e-38	1.44654e-35	At5g65140	K01087 trehalose 6-phosphate phosphatase [EC:3.1.3.12] | (RefSeq) probable trehalose-phosphate phosphatase J (A)
GLYMA_02G028800	1912	9.15	71.9	312.333	2677	3.02056	up	4.26918e-38	1.45801e-35	At1g59970	K07999 matrix metalloproteinase-20 (enamelysin) [EC:3.4.24.-] | (RefSeq) metalloendoproteinase 4-MMP (A)
GLYMA_18G204200	3249	37.5967	337.697	1612.33	15968.3	3.21932	up	8.1244e-38	2.74717e-35	At5g54960	K01568 pyruvate decarboxylase [EC:4.1.1.1] | (RefSeq) pyruvate decarboxylase 2 (A)
GLYMA_06G111300	1883	2.39667	12.9933	80.6667	490.333	2.50318	up	1.05176e-37	3.52154e-35	At1g77640	K09286 EREBP-like factor | (RefSeq) ethylene-responsive transcription factor ERF010 (A)
GLYMA_04G061500	2460	9.88	57.5667	309.333	2014.33	2.60279	up	1.87304e-37	6.21049e-35	At5g25110	K07198 5'-AMP-activated protein kinase, catalytic alpha subunit [EC:2.7.11.11] | (RefSeq) CBL-interacting protein kinase 2 (A)
GLYMA_16G107000	5302	0.92	9.19	49	533.667	3.37112	up	9.13026e-37	2.99824e-34	At1g31470	--
GLYMA_04G004500	3043	12.63	66.4	559.333	3216.33	2.448	up	2.45291e-36	7.97825e-34	At4g34950	--
GLYMA_06G319300	1223	35.8633	181.317	785	4513.67	2.40452	up	2.61165e-36	8.41443e-34	At5g62350	K01051 pectinesterase [EC:3.1.1.11] | (RefSeq) pectinesterase (A)
GLYMA_17G259000	6179	6.96	28.1333	303.333	1384	2.08099	up	7.07851e-36	2.2593e-33	At1g20080	--
GLYMA_10G010000	2688	0.543333	6.30333	18.6667	242.333	3.59711	up	8.89433e-36	2.81259e-33	At1g02460	K01213 galacturan 1,4-alpha-galacturonidase [EC:3.2.1.67] | (RefSeq) polygalacturonase At1g48100 (A)
GLYMA_04G199900	2922	1.58667	12.19	54.6667	461.667	2.9933	up	1.22638e-35	3.84249e-33	At3g23690	K23050 phenylcoumaran benzylic ether reductase [EC:1.3.1.-] | (RefSeq) eugenol synthase 1 (A)
GLYMA_12G200400	917	1.51333	36.3867	25	680.333	4.64948	up	1.51265e-35	4.69637e-33	At4g10270	--
GLYMA_10G028000	3903	2.92667	11.0667	204.333	860	1.97835	up	2.7281e-35	8.32963e-33	At3g63220	--
novel.1287	1838	1.54333	12.2233	50.6667	456.333	3.05224	up	2.73166e-35	8.32963e-33	--	--
GLYMA_03G202300	4693	2.86333	10.7333	204.333	853.667	1.96658	up	2.94868e-35	8.91179e-33	At2g35940	--
GLYMA_03G042700	3624	44.4033	2.27333	2035	120.333	-4.21153	down	3.11817e-35	9.34138e-33	At2g38470	K13424 WRKY transcription factor 33 | (RefSeq) probable WRKY transcription factor 33 (A)
GLYMA_13G231700	4294	42.9567	335.067	2641	22823.7	3.0193	up	3.34154e-35	9.92351e-33	At5g54960	K01568 pyruvate decarboxylase [EC:4.1.1.1] | (RefSeq) pyruvate decarboxylase 1 (A)
GLYMA_03G214100	4450	2.09667	10.1833	101.667	554.333	2.34359	up	3.48955e-35	1.02737e-32	At1g02860	K16275 E3 ubiquitin-protein ligase BAH [EC:2.3.2.27] | (RefSeq) E3 ubiquitin-protein ligase BAH1 (A)
GLYMA_04G217400	1591	0.436667	10.41	10	259.667	4.62394	up	7.83713e-35	2.28764e-32	At5g64750	K09286 EREBP-like factor | (RefSeq) ethylene-responsive transcription factor RAP2-3 (A)
GLYMA_02G171200	5593	1.73667	8.59333	137.333	754.667	2.36379	up	8.4173e-35	2.43617e-32	At5g06700	K23877 xyloglucan O-acetyltransferase | (RefSeq) protein ALTERED XYLOGLUCAN 4 isoform X1 (A)
GLYMA_13G001800	1263	11.0267	122.683	248.667	3180	3.53987	up	9.45787e-35	2.71433e-32	--	--
GLYMA_06G132500	4061	184.707	620.743	6831	25962.3	1.81354	up	1.99483e-34	5.67728e-32	At1g64650	K24175 MFS transporter, MFS domain-containing protein family, molybdate-anion transporter | (RefSeq) molybdate-anion transporter isoform X2 (A)
GLYMA_04G233400	5063	1.98667	11.5067	144.333	927.667	2.58888	up	2.08259e-34	5.87807e-32	At5g24320	K20241 WD repeat-containing protein 44 | (RefSeq) WD repeat-containing protein 44 isoform X1 (A)
GLYMA_20G105300	14292	19.22	2.55667	898.333	133	-2.85036	down	2.2424e-34	6.27724e-32	At4g35780	K14510 serine/threonine-protein kinase CTR1 [EC:2.7.11.1] | (RefSeq) serine/threonine-protein kinase CTR1 (A)
GLYMA_17G074800	2344	26.69	109.61	1120.33	5229.67	2.10604	up	2.36582e-34	6.5689e-32	At4g30960	K07198 5'-AMP-activated protein kinase, catalytic alpha subunit [EC:2.7.11.11] | (RefSeq) CBL-interacting protein kinase 2 (A)
novel.333	5551	0.493333	6.01333	18.6667	252	3.66489	up	2.65027e-34	7.29936e-32	At3g55350	--
GLYMA_10G064900	1418	1.85333	15.2133	45.6667	418.667	3.09988	up	4.06923e-34	1.11178e-31	At3g10040	--
GLYMA_05G222400	1946	2.24667	16.2233	54.6667	434.333	2.90848	up	5.78607e-34	1.5683e-31	At2g19590	K05933 aminocyclopropanecarboxylate oxidase [EC:1.14.17.4] | (RefSeq) 1-aminocyclopropane-1-carboxylate oxidase 1 (A)
GLYMA_08G141900	741	35.8033	6.35667	474.667	95.6667	-2.42028	down	6.20776e-34	1.66935e-31	--	--
GLYMA_09G003700	2199	2.60333	15.1267	63.3333	413.667	2.6018	up	8.80871e-34	2.35027e-31	At3g12160	K07904 Ras-related protein Rab-11A | (RefSeq) ras-related Rab-11 family protein (A)
GLYMA_14G020000	2358	128.527	467.143	4042.67	16404	1.92111	up	1.20112e-33	3.17991e-31	At5g55180	K19891 glucan endo-1,3-beta-glucosidase 1/2/3 [EC:3.2.1.39] | (RefSeq) glucan endo-1,3-beta-glucosidase 3 isoform X1 (A)
GLYMA_13G220500	4226	4.14	25.5633	96	663.667	2.68599	up	1.88146e-33	4.94273e-31	At5g52060	--
GLYMA_18G235300	4608	2.70667	11.4067	140.667	665.333	2.13787	up	4.84343e-33	1.26269e-30	At5g41350	K19043 E3 ubiquitin-protein ligase RHF [EC:2.3.2.27] | (RefSeq) E3 ubiquitin-protein ligase RHF1A (A)
GLYMA_11G017100	4450	12.0033	43.0567	442.667	1787.33	1.90625	up	5.02855e-33	1.30102e-30	At4g10960	K01784 UDP-glucose 4-epimerase [EC:5.1.3.2] | (RefSeq) UDP-glucose 4-epimerase GEPI48 isoform X2 (A)
GLYMA_06G042100	1391	12.3933	78.7767	308.333	2248.33	2.73658	up	5.18769e-33	1.33211e-30	At1g46768	K09286 EREBP-like factor | (RefSeq) DREB2; dehydration-responsive element binding protein 2 (A)
GLYMA_07G238000	3022	3.35667	15.6133	148.333	776.333	2.27929	up	6.04896e-33	1.54167e-30	At5g49520	K18835 WRKY transcription factor 2 | (RefSeq) WRKY59; probable WRKY transcription factor 2 (A)
GLYMA_02G222400	3122	291.12	942.53	9163.33	33538	1.76102	up	8.07531e-33	2.04287e-30	At2g36460	K01623 fructose-bisphosphate aldolase, class I [EC:4.1.2.13] | (RefSeq) putative fructose-bisphosphate aldolase (A)
GLYMA_03G154200	1587	207.21	39.4067	5147	1112	-2.32656	down	1.05045e-32	2.63787e-30	At3g63200	--
GLYMA_13G367600	1353	1.15667	10.78	28	297.667	3.29055	up	1.21768e-32	3.03549e-30	At1g80520	--
GLYMA_11G235000	904	2.31	32.4667	27.6667	430	3.86627	up	1.28925e-32	3.1906e-30	At5g27760	--
GLYMA_11G129600	3318	24.97	3.34	873.667	135	-2.82466	down	2.10896e-32	5.18166e-30	At2g44480	K01188 beta-glucosidase [EC:3.2.1.21] | (RefSeq) cyanogenic beta-glucosidase (A)
GLYMA_05G009000	1214	0.336667	18.76	4.66667	283	5.86154	up	5.68857e-32	1.38769e-29	At5g25940	--
GLYMA_10G195700	3782	4.83	52.61	317	3760.33	3.49008	up	1.18339e-31	2.86631e-29	At1g73080	K20718 LRR receptor-like serine/threonine-protein kinase ERECTA [EC:2.7.11.1] | (RefSeq) LRR receptor-like serine/threonine-protein kinase ERECTA (A)
GLYMA_06G035300	4137	18.9667	103.777	670.667	4160.33	2.51553	up	1.1998e-31	2.88559e-29	At4g31940	K23136 fraxetin 5-hydroxylase [EC:1.14.14.164] | (RefSeq) xanthotoxin 5-hydroxylase CYP82C4 (A)
GLYMA_07G067700	4434	6.86333	0.0766667	303	3.66667	-6.45811	down	1.29381e-31	3.08995e-29	At1g01580	K00521 ferric-chelate reductase [EC:1.16.1.7] | (RefSeq) ferric reduction oxidase 2 (A)
GLYMA_19G228700	1779	9.60333	41.47	214.333	1052	2.1778	up	1.35349e-31	3.21004e-29	At3g62550	--
GLYMA_04G042100	1785	14.21	2.34333	357	66	-2.53708	down	1.53675e-31	3.61953e-29	At3g16150	K13051 L-asparaginase / beta-aspartyl-peptidase [EC:3.5.1.1 3.4.19.5] | (RefSeq) probable isoaspartyl peptidase/L-asparaginase 2-like (A)
GLYMA_12G022800	2108	24.3767	81.37	577	2146.33	1.79936	up	1.74707e-31	4.08672e-29	At4g38400	K20628 expansin | (RefSeq) EXPB8; expansin-B3-like precursor (A)
GLYMA_09G165900	2800	2.06	10.2833	103.333	575.333	2.37964	up	1.7861e-31	4.14957e-29	At1g61260	--
GLYMA_12G200600	1020	12.67	144.323	231.667	3055.33	3.5811	up	1.85859e-31	4.28882e-29	At4g10270	--
GLYMA_12G048000	837	0.663333	17.44	10	304.667	4.79052	up	2.67447e-31	6.1301e-29	At2g15960	--
GLYMA_15G083700	3679	3.85667	19.5833	104.667	586	2.39998	up	2.93651e-31	6.68584e-29	At3g58670	K23953 plant cysteine oxidase [EC:1.13.11.-] | (RefSeq) uncharacterized protein LOC100777850 (A)
GLYMA_18G045100	6641	28.5033	81.2633	1477.67	4722.67	1.57266	up	3.24855e-31	7.34732e-29	At1g65840	K17839 polyamine oxidase [EC:1.5.3.17 1.5.3.-] | (RefSeq) probable polyamine oxidase 4 isoform X1 (A)
GLYMA_20G115900	1639	0.316667	9.01333	9.33333	304	4.8992	up	4.15797e-31	9.28394e-29	At1g68500	--
GLYMA_17G211300	3456	22.5667	2.59	984	130.333	-3.05058	down	4.15918e-31	9.28394e-29	At2g25460	--
GLYMA_11G129500	3093	110.043	14.9967	3723.33	588.667	-2.80005	down	4.24967e-31	9.42434e-29	At2g44480	K01188 beta-glucosidase [EC:3.2.1.21] | (RefSeq) cyanogenic beta-glucosidase (A)
GLYMA_04G102700	5790	13.5167	2.77667	475.333	109.333	-2.22317	down	4.43695e-31	9.77617e-29	At1g34580	K24193 MFS transporter, SP family, sugar:H+ symporter | (RefSeq) sugar transport protein 5 (A)
GLYMA_18G277100	937	3.50667	24.26	58.6667	463.333	2.8601	up	7.79412e-31	1.70631e-28	At5g15830	--
GLYMA_08G152500	3170	66.7733	617.51	2679.33	28197	3.27275	up	9.90672e-31	2.15499e-28	At2g42280	K12126 phytochrome-interacting factor 3 | (RefSeq) transcription factor PIF3 (A)
GLYMA_01G157400	1587	3.29333	16.7267	93.3333	530.667	2.40777	up	1.11088e-30	2.4012e-28	At1g76410	K19040 E3 ubiquitin-protein ligase ATL10/75/76/77/78 [EC:2.3.2.27] | (RefSeq) RING-H2 finger protein (A)
novel.1492	3713	480.26	140.757	20187.7	6686.33	-1.70498	down	1.92587e-30	4.13662e-28	At3g45640	K20536 mitogen-activated protein kinase 3 [EC:2.7.11.24] | (RefSeq) MAPK1; mitogen-activated protein kinase 1 (A)
GLYMA_13G153100	6460	35.3733	96.6067	1614.67	4917.67	1.51004	up	2.32542e-30	4.96361e-28	At1g65840	K17839 polyamine oxidase [EC:1.5.3.17 1.5.3.-] | (RefSeq) probable polyamine oxidase 4 (A)
GLYMA_09G254800	2226	29.6133	118.1	879	3967.33	2.0589	up	3.63205e-30	7.70446e-28	At4g01250	K13425 WRKY transcription factor 22 | (RefSeq) WRKY transcription factor 22 (A)
GLYMA_07G058800	1620	0.593333	9.69667	12	224	4.1095	up	3.89774e-30	8.21701e-28	At5g56760	K00640 serine O-acetyltransferase [EC:2.3.1.30] | (RefSeq) serine acetyltransferase 5 (A)
GLYMA_07G163200	7019	103.957	23.32	7322.33	1854	-2.09322	down	4.14868e-30	8.69237e-28	At2g23460	K19729 guanine nucleotide-binding protein G(t) subunit alpha 3 | (RefSeq) guanine nucleotide-binding protein alpha-2 subunit isoform X2 (A)
GLYMA_04G226700	3419	228.487	57.3667	10470.3	2933.33	-1.93069	down	4.19818e-30	8.74246e-28	At4g35580	--
GLYMA_15G221300	2325	145.42	32.4833	4943.67	1238	-2.09935	down	4.39576e-30	9.09842e-28	At2g15480	K18822 soyasapogenol B glucuronide galactosyltransferase [EC:2.4.1.272] | (RefSeq) SGT2; soyasapogenol B glucuronide galactosyltransferase (A)
GLYMA_03G055100	4585	0.156667	6.71	6.66667	298	5.4415	up	9.45506e-30	1.94524e-27	At5g01320	K01568 pyruvate decarboxylase [EC:4.1.1.1] | (RefSeq) pyruvate decarboxylase 2 (A)
GLYMA_12G012000	12437	0.283333	2.91	18	206.333	3.4218	up	1.05067e-29	2.14865e-27	At1g13750	K22390 acid phosphatase type 7 | (RefSeq) probable inactive purple acid phosphatase 27 (A)
GLYMA_01G036900	1812	57.2233	255.717	1853	9228.67	2.21508	up	1.10654e-29	2.24944e-27	At1g59970	K07999 matrix metalloproteinase-20 (enamelysin) [EC:3.4.24.-] | (RefSeq) metalloendoproteinase 4-MMP (A)
GLYMA_06G310000	6573	2.87	14.7133	251.667	1418.33	2.41278	up	2.48864e-29	5.02911e-27	At5g36930	K13457 disease resistance protein RPM1 | (RefSeq) disease resistance protein RPM1 (A)
GLYMA_09G065300	23154	3.67333	15.1233	164	755	2.10143	up	3.20482e-29	6.43737e-27	At2g19450	K11155 diacylglycerol O-acyltransferase 1 [EC:2.3.1.20 2.3.1.75 2.3.1.76] | (RefSeq) DGAT; diacylglycerol O-acyltransferase 1C (A)
GLYMA_10G209100	7196	1.9	7.5	112.667	495.333	2.04077	up	3.22321e-29	6.43737e-27	At5g04250	K13717 OTU domain-containing protein 3 [EC:3.4.19.12] | (RefSeq) OVARIAN TUMOR DOMAIN-containing deubiquitinating enzyme 7 isoform X1 (A)
GLYMA_20G022500	10222	11.3467	0.806667	1793.33	149.667	-3.72093	down	3.39147e-29	6.73405e-27	At4g19690	K14709 solute carrier family 39 (zinc transporter), member 1/2/3 | (RefSeq) uncharacterized protein LOC100795511 precursor (A)
GLYMA_06G136200	2440	276.307	61.6067	9042.67	2289.67	-2.09939	down	5.28992e-29	1.04428e-26	At1g64720	--
GLYMA_09G235200	6120	1.67333	8.48333	97	544	2.39903	up	9.78433e-29	1.92043e-26	At1g69480	K24195 xenotropic and polytropic retrovirus receptor 1 | (RefSeq) PHO1-H14; phosphate transporter PHO1 homolog 1 (A)
GLYMA_04G057700	861	15.4967	2.11333	238.667	36.3333	-2.81687	down	1.19356e-28	2.32929e-26	At1g74930	K09286 EREBP-like factor | (RefSeq) ethylene-responsive transcription factor ERF023 (A)
GLYMA_19G046300	1968	10.5333	96.1533	245	2545	3.25449	up	1.67561e-28	3.25145e-26	At3g02550	K13945 LOB domain-containing protein 29 | (RefSeq) LBD8; LOB domain-containing protein 33 (A)
GLYMA_05G186700	2135	31.4367	182.39	976	6337	2.59512	up	2.25865e-28	4.35805e-26	At5g64750	K09286 EREBP-like factor | (RefSeq) ERF7; ethylene-responsive transcription factor 7 (A)
GLYMA_12G054100	2851	99.7467	12.6367	3296	485.333	-2.90414	down	2.48534e-28	4.7685e-26	At2g44480	K01188 beta-glucosidase [EC:3.2.1.21] | (RefSeq) cyanogenic beta-glucosidase (A)
GLYMA_12G188900	1666	1.19333	9.92667	35.6667	327.333	3.10754	up	2.68135e-28	5.11584e-26	At2g35930	K09561 STIP1 homology and U-box containing protein 1 [EC:2.3.2.27] | (RefSeq) E3 ubiquitin-protein ligase CHIP (A)
GLYMA_17G068200	1703	9.00333	41.51	274.333	1409.33	2.26085	up	3.14725e-28	5.97139e-26	At4g30370	K19038 E3 ubiquitin-protein ligase ATL41 [EC:2.3.2.27] | (RefSeq) RING-H2 finger protein ATL40 (A)
GLYMA_18G008300	5329	1.51333	7.32667	104	555.667	2.33322	up	3.27171e-28	6.17322e-26	At1g27910	K08332 vacuolar protein 8 | (RefSeq) U-box domain-containing protein 15 (A)
GLYMA_08G169100	2348	10.4567	0.37	239.667	9.66667	-4.73406	down	3.65639e-28	6.86116e-26	At3g12900	K23145 scopoletin 8-hydroxylase [EC:1.14.11.60] | (RefSeq) uncharacterized protein LOC100803722 (A)
GLYMA_13G117600	4099	16.5267	2.92667	587.333	119.667	-2.41989	down	4.53177e-28	8.45732e-26	At4g04450	K13424 WRKY transcription factor 33 | (RefSeq) WRKY19; WRKY transcription factor 19 (A)
GLYMA_20G236900	2656	11.1033	56.0633	206.667	1182.33	2.40207	up	5.0484e-28	9.37026e-26	At3g05550	--
GLYMA_20G030600	1206	14.98	1.52	322.333	36	-3.25549	down	5.30018e-28	9.78443e-26	At3g11810	--
GLYMA_11G008000	2202	19.8833	72.4467	644.667	2662.67	1.92951	up	5.49123e-28	1.00826e-25	At3g22600	--
GLYMA_18G259500	5321	27.2667	3.79667	816.667	132	-2.76202	down	5.73634e-28	1.04763e-25	At1g80760	K09874 aquaporin NIP | (RefSeq) NIP2-2; putative Si transporter NIP2-2 (A)
GLYMA_11G249000	5385	3.95333	16.2767	273.333	1252.67	2.10137	up	8.7199e-28	1.58405e-25	At1g27910	K08332 vacuolar protein 8 | (RefSeq) U-box domain-containing protein 15 (A)
GLYMA_06G021200	7366	0.41	5.70333	15.3333	238.333	3.85404	up	8.93781e-28	1.61434e-25	At1g60420	K17609 nucleoredoxin [EC:1.8.1.8] | (RefSeq) probable nucleoredoxin 2 isoform X2 (A)
GLYMA_18G284400	3203	0.27	4.33667	10	181	4.06987	up	8.98115e-28	1.61434e-25	At5g14090	--
GLYMA_13G238700	2844	1.48	8.51	75.3333	481.667	2.57814	up	9.20619e-28	1.64612e-25	At4g04960	K13416 brassinosteroid insensitive 1-associated receptor kinase 1 [EC:2.7.10.1 2.7.11.1] | (RefSeq) BRASSINOSTEROID INSENSITIVE 1-associated receptor kinase 1 (A)
GLYMA_04G051000	2256	0.196667	13.9533	3.33333	253	6.19578	up	9.34588e-28	1.6624e-25	At5g56840	--
GLYMA_14G195000	6771	9.40667	30.3567	366.667	1330.67	1.75573	up	9.58193e-28	1.69555e-25	At3g47340	K01953 asparagine synthase (glutamine-hydrolysing) [EC:6.3.5.4] | (RefSeq) AS2; asparagine synthetase 2 (A)
GLYMA_12G204400	25494	18.89	66.62	1089.67	4242.33	1.87516	up	1.37423e-27	2.41921e-25	At4g03560	K16900 two pore calcium channel protein, plant | (RefSeq) two pore calcium channel protein 1 (A)
GLYMA_08G232400	1031	10.5367	55.7633	194.333	1185	2.47808	up	1.43634e-27	2.51558e-25	At2g44310	--
GLYMA_20G062000	3981	39.28	4.52333	1080.67	137.333	-3.0685	down	1.50927e-27	2.62983e-25	At5g47650	--
GLYMA_19G018700	2239	5.50333	33.59	220.333	1558.33	2.68458	up	2.04435e-27	3.54409e-25	At5g40010	K08900 mitochondrial chaperone BCS1 | (RefSeq) AAA-ATPase ASD, mitochondrial isoform X1 (A)
GLYMA_18G063500	2996	40.9267	255.577	921	6637.33	2.71461	up	2.32442e-27	4.00927e-25	At3g47160	--
GLYMA_07G208700	2084	69.88	306.877	1438.33	7238.67	2.20628	up	2.58221e-27	4.43153e-25	At2g15890	--
GLYMA_19G144900	3855	3.85333	15.4333	123.667	557.667	2.06698	up	2.72293e-27	4.64967e-25	At3g12150	--
GLYMA_04G199400	6418	2.55667	9.43667	165.333	678	1.94283	up	3.22843e-27	5.48544e-25	At3g26890	--
GLYMA_15G057300	835	6.41667	60.43	95.3333	1000.33	3.28531	up	3.52243e-27	5.95535e-25	--	--
GLYMA_06G315100	6209	6.60333	1.08	501.333	91.6667	-2.55423	down	3.7345e-27	6.28279e-25	Hs14424433	K14802 phospholipid-transporting ATPase [EC:7.6.2.1] | (RefSeq) phospholipid-transporting ATPase 1 isoform X1 (A)
GLYMA_12G238300	546	18.1533	90.4467	177.333	998.333	2.37879	up	4.71081e-27	7.88644e-25	--	--
GLYMA_13G048800	3108	28.0367	96.2733	1559.67	5935.33	1.83568	up	5.16724e-27	8.60837e-25	At5g15870	K01180 endo-1,3(4)-beta-glucanase [EC:3.2.1.6] | (RefSeq) probable endo-1,3(4)-beta-glucanase ARB_01444 (A)
GLYMA_05G236800	3403	0.416667	4.89333	15	196	3.61252	up	5.32778e-27	8.83274e-25	At1g23200	K01051 pectinesterase [EC:3.1.1.11] | (RefSeq) pectinesterase 2 (A)
GLYMA_07G011800	2710	1.98333	13.2867	54.3333	403	2.79919	up	6.7208e-27	1.10883e-24	At1g17710	K13248 pyridoxal phosphate phosphatase PHOSPHO2 [EC:3.1.3.74] | (RefSeq) inorganic pyrophosphatase 2 (A)
GLYMA_09G069500	3379	15.9433	53.97	466.333	1775	1.82143	up	7.17519e-27	1.17811e-24	--	--
GLYMA_15G098200	5225	8.28667	27.0733	385	1395.67	1.76528	up	7.92825e-27	1.29553e-24	At2g47900	K19600 tubby and related proteins | (RefSeq) tubby-like F-box protein 3 isoform X1 (A)
GLYMA_07G209900	2764	29.21	4.56	812.667	147	-2.59677	down	9.73718e-27	1.58354e-24	At1g49570	K00430 peroxidase [EC:1.11.1.7] | (RefSeq) peroxidase 10 (A)
GLYMA_10G067000	558	45.81	4.02	456	47	-3.42143	down	1.10181e-26	1.78337e-24	At4g25490	K09286 EREBP-like factor | (RefSeq) ethylene-responsive transcription factor ERF023 (A)
GLYMA_05G003900	4631	1.69	12.0133	75.6667	608	2.88735	up	1.16638e-26	1.87897e-24	At5g40390	K06617 raffinose synthase [EC:2.4.1.82] | (RefSeq) galactinol--sucrose galactosyltransferase (A)
GLYMA_11G077800	2193	3.38	14.8567	99	483.667	2.19715	up	1.8521e-26	2.96962e-24	At4g38660	K12173 BRCA1-A complex subunit BRE | (RefSeq) BRISC and BRCA1-A complex member 2 (A)
GLYMA_14G175100	2119	9.76333	44.0267	275	1413	2.23893	up	2.05603e-26	3.2812e-24	At1g22360	K13691 pathogen-inducible salicylic acid glucosyltransferase [EC:2.4.1.-] | (RefSeq) UDP-glycosyltransferase 74G1 (A)
GLYMA_10G286900	2173	1.95667	12.6467	61.3333	445	2.75821	up	2.40592e-26	3.82173e-24	At5g08350	--
GLYMA_17G151000	1391	10.4467	39.96	235.333	998.333	1.99615	up	2.58835e-26	4.09246e-24	At4g17670	--
GLYMA_06G114200	3206	32.9733	8.03667	966.667	265	-1.97406	down	2.94501e-26	4.63494e-24	At1g44130	K22683 aspartyl protease family protein [EC:3.4.23.-] | (RefSeq) aspartyl protease family protein 2 (A)
GLYMA_15G245300	5523	2.32	21.2567	75.6667	800.333	3.26438	up	3.17231e-26	4.96975e-24	At3g14630	K17873 11-oxo-beta-amyrin 30-oxidase [EC:1.14.14.115] | (RefSeq) 11-oxo-beta-amyrin 30-oxidase (A)
GLYMA_02G243400	9615	9.17333	31.4167	560.333	2145.67	1.84046	up	3.47845e-26	5.42448e-24	At3g02850	K21867 potassium channel | (RefSeq) potassium channel SKOR isoform X1 (A)
GLYMA_18G017700	2423	17.2033	57.5667	745	2753	1.79719	up	4.17157e-26	6.47579e-24	At4g39840	--
GLYMA_13G372200	2261	2.13	11.12	86.3333	491.667	2.43517	up	4.77838e-26	7.38422e-24	At1g17740	K00058 D-3-phosphoglycerate dehydrogenase / 2-oxoglutarate reductase [EC:1.1.1.95 1.1.1.399] | (RefSeq) D-3-phosphoglycerate dehydrogenase 2, chloroplastic (A)
GLYMA_06G051500	4728	13.8267	67.3133	383.667	2113.67	2.34652	up	5.66235e-26	8.68124e-24	At5g11790	K18266 protein NDRG1 | (RefSeq) uncharacterized protein LOC100803300 (A)
GLYMA_03G138000	4486	160.997	55.5633	7416.67	2891	-1.46902	down	5.66853e-26	8.68124e-24	At3g57530	K13412 calcium-dependent protein kinase [EC:2.7.11.1] | (RefSeq) calcium-dependent protein kinase 32 (A)
GLYMA_14G073200	2173	51.4367	402.533	808	7416.67	3.04704	up	6.04624e-26	9.21836e-24	At1g19530	--
GLYMA_17G173000	1507	44.17	7.45	1188.67	231	-2.49509	down	7.09271e-26	1.07658e-23	At3g50310	K20716 mitogen-activated protein kinase kinase kinase 17/18 | (RefSeq) mitogen-activated protein kinase kinase kinase 18 (A)
GLYMA_12G181800	2483	103.997	24.1767	4615.33	1201	-2.04624	down	7.24774e-26	1.09524e-23	At2g27820	K05359 arogenate/prephenate dehydratase [EC:4.2.1.91 4.2.1.51] | (RefSeq) arogenate dehydratase 3 (A)
GLYMA_13G341100	4343	6.71333	25.9233	248.667	1067.67	2.01147	up	9.58656e-26	1.44229e-23	At5g59010	K14500 BR-signaling kinase [EC:2.7.11.1] | (RefSeq) serine/threonine-protein kinase BSK3 (A)
GLYMA_16G153600	605	40.2933	187.283	436	2322	2.28493	up	1.17375e-25	1.75815e-23	--	--
GLYMA_19G256700	2611	6.54	1.20333	306	63	-2.37707	down	1.24492e-25	1.85662e-23	At1g01260	K13422 transcription factor MYC2 | (RefSeq) transcription factor MYC1 (A)
GLYMA_18G026700	3521	10.7867	1.82667	536.667	100.667	-2.50627	down	1.38425e-25	2.05544e-23	At3g55950	K13430 serine/threonine-protein kinase PBS1 [EC:2.7.11.1] | (RefSeq) probable serine/threonine-protein kinase PBL7 isoform X1 (A)
GLYMA_04G090000	1494	3.28	20.2733	57.6667	410	2.70432	up	1.58609e-25	2.34494e-23	At5g65660	--
GLYMA_06G025200	2904	10.2833	42.7933	293	1390.33	2.12352	up	2.12427e-25	3.12707e-23	At3g53450	K22522 cytokinin riboside 5'-monophosphate phosphoribohydrolase [EC:3.2.2.-] | (RefSeq) cytokinin riboside 5'-monophosphate phosphoribohydrolase LOG1 (A)
GLYMA_02G108300	1262	9.30333	63.6633	210.667	1668.67	2.85037	up	2.64197e-25	3.87247e-23	At1g26800	K11982 E3 ubiquitin-protein ligase RNF115/126 [EC:2.3.2.27] | (RefSeq) E3 ubiquitin-protein ligase RING1 (A)
GLYMA_19G020500	4572	13.6267	67.05	436.333	2431.33	2.36291	up	2.68796e-25	3.92304e-23	At5g39890	K23953 plant cysteine oxidase [EC:1.13.11.-] | (RefSeq) plant cysteine oxidase 2 (A)
GLYMA_19G055000	4774	5.08333	21.2033	341	1574	2.11541	up	2.87785e-25	4.18231e-23	At5g36930	K13457 disease resistance protein RPM1 | (RefSeq) disease resistance protein RPM1 (A)
GLYMA_02G136700	2078	21.14	97.6667	432.667	2298	2.28118	up	3.81555e-25	5.52155e-23	At2g15890	--
GLYMA_13G164300	1914	4.39667	17.5433	151	677.667	2.0606	up	4.60948e-25	6.64231e-23	At5g25280	--
GLYMA_13G230200	2141	2.73667	23.2633	58.6667	580	3.16163	up	5.32655e-25	7.64338e-23	At2g34140	--
GLYMA_12G200800	672	3.65667	26.9467	44	365.333	2.94301	up	6.79062e-25	9.70349e-23	At4g10270	--
GLYMA_11G043700	2469	109.86	20.96	4085.33	891	-2.31912	down	8.82035e-25	1.25514e-22	At4g37850	K13422 transcription factor MYC2 | (RefSeq) transcription factor MYC1 (A)
GLYMA_01G036800	1867	9.94	40.1067	332	1505	2.07209	up	1.08864e-24	1.5427e-22	At5g50120	--
GLYMA_09G216800	7495	6.85333	22.9867	699	2614.67	1.80391	up	1.19502e-24	1.68646e-22	At5g45280	K19882 O-palmitoleoyl-L-serine hydrolase [EC:3.1.1.98] | (RefSeq) pectin acetylesterase 8 (A)
GLYMA_11G139300	3685	15.1267	39.4233	551	1599	1.44219	up	1.48114e-24	2.08011e-22	At2g28930	K13430 serine/threonine-protein kinase PBS1 [EC:2.7.11.1] | (RefSeq) serine/threonine-protein kinase PBS1 isoform X2 (A)
GLYMA_03G258100	2516	12.87	2.87	578.333	144.333	-2.10454	down	1.48614e-24	2.08011e-22	At1g01260	K13422 transcription factor MYC2 | (RefSeq) transcription factor MYC2 (A)
GLYMA_05G211700	2864	21.41	6.21333	816.667	262.333	-1.72823	down	1.55182e-24	2.16317e-22	At4g11280	K20772 1-aminocyclopropane-1-carboxylate synthase 1/2/6 [EC:4.4.1.14] | (RefSeq) ACS1; 1-aminocyclopropane-1-carboxylate synthase (A)
GLYMA_18G258100	3451	0.766667	7.85667	22.6667	261.333	3.42452	up	1.63545e-24	2.27048e-22	At3g49190	--
GLYMA_20G202200	4479	11.2833	66.1633	794.333	5143.33	2.60632	up	1.68563e-24	2.33068e-22	At3g23150	K14509 ethylene receptor [EC:2.7.13.-] | (RefSeq) ethylene receptor 2 (A)
GLYMA_11G077900	1848	0.646667	7.42333	11.6667	149.667	3.58421	up	1.84867e-24	2.5458e-22	At2g17850	K22547 arsenate reductase [EC:1.20.4.1] | (RefSeq) protein HIGH ARSENIC CONTENT 1-like (A)
GLYMA_14G080100	7016	9.37667	35.7967	489.667	2065.33	1.98859	up	2.0463e-24	2.80664e-22	At5g66850	K20717 mitogen-activated protein kinase kinase kinase YODA [EC:2.7.11.25] | (RefSeq) mitogen-activated protein kinase kinase kinase YODA (A)
GLYMA_09G238900	4282	2.21333	9.91667	116	583	2.22381	up	2.08757e-24	2.85179e-22	At5g39780	--
GLYMA_17G129600	7252	9.89667	34.4867	349.333	1382.33	1.8695	up	2.13963e-24	2.91125e-22	At3g48530	--
GLYMA_19G042900	3827	5.63	25.9067	201	1058.33	2.27138	up	2.24702e-24	3.04525e-22	At5g38710	K00318 proline dehydrogenase [EC:1.5.5.2] | (RefSeq) proline dehydrogenase 2, mitochondrial (A)
GLYMA_05G207500	3574	37.53	98.7267	1334.33	3954.67	1.46051	up	2.73829e-24	3.69637e-22	At5g12250	K07375 tubulin beta | (RefSeq) tubulin beta-1 chain-like (A)
GLYMA_03G248800	5727	4.71	13.7733	435.667	1436.33	1.61133	up	3.03878e-24	4.08584e-22	At1g08800	--
GLYMA_19G130400	974	2.23333	16.1733	39	320	2.92026	up	3.31761e-24	4.44326e-22	At2g41180	--
GLYMA_08G013100	1078	55.4	8.47667	944.667	168	-2.62799	down	3.84753e-24	5.13284e-22	At3g14260	--
GLYMA_10G215700	2029	0.74	8.12	17.3333	215.333	3.52053	up	3.90178e-24	5.18496e-22	At5g54160	K21553 isoliquiritigenin 2'-O-methyltransferase [EC:2.1.1.154] | (RefSeq) isoliquiritigenin 2'-O-methyltransferase (A)
GLYMA_08G158500	1163	7.67333	40.5333	159.667	969.333	2.47655	up	4.68704e-24	6.20434e-22	At2g31940	--
GLYMA_17G047700	2368	345.423	84.9467	10154	2799.67	-1.96172	down	4.74447e-24	6.25611e-22	At1g19180	K13464 jasmonate ZIM domain-containing protein | (RefSeq) CCT motif and tify domain-containing protein (A)
GLYMA_05G188900	910	1.03667	13.6633	17	252.333	3.78867	up	5.34282e-24	7.018e-22	At1g49210	K19040 E3 ubiquitin-protein ligase ATL10/75/76/77/78 [EC:2.3.2.27] | (RefSeq) RING-H2 finger protein ATL78 (A)
GLYMA_15G071400	2368	1.94	8.84	82.3333	414.333	2.24089	up	5.521e-24	7.22426e-22	At5g60200	--
GLYMA_15G271900	3077	44.0833	378.847	1709	16592.7	3.16151	up	7.82875e-24	1.02049e-21	At2g42280	K12126 phytochrome-interacting factor 3 | (RefSeq) transcription factor PIF3 (A)
GLYMA_09G092100	2995	2.73	13.1467	146.667	796.667	2.32905	up	9.19745e-24	1.19434e-21	At5g25280	--
GLYMA_12G104600	1411	36.1767	6.29	739.333	147.667	-2.45218	down	1.00991e-23	1.30645e-21	At2g31180	K09422 transcription factor MYB, plant | (RefSeq) transcription factor MYB13 (A)
GLYMA_06G128700	7194	3.32	15.8233	318.667	1754.33	2.32826	up	1.05305e-23	1.35712e-21	At5g24270	K06268 serine/threonine-protein phosphatase 2B regulatory subunit | (RefSeq) calcineurin B-like protein 4 isoform X2 (A)
GLYMA_12G189000	2111	1.41	9.04333	44	309.333	2.73132	up	1.15663e-23	1.485e-21	At2g35930	--
GLYMA_16G040400	841	64.43	263.55	970.333	4499.67	2.09642	up	1.60229e-23	2.04949e-21	--	--
GLYMA_16G037900	812	128.323	520.697	1861.33	8686.67	2.09046	up	1.72445e-23	2.19752e-21	--	--
GLYMA_16G144900	3485	1.24667	10.4967	33	305	3.12521	up	1.76522e-23	2.24111e-21	At2g23540	--
GLYMA_20G189900	5666	15.6133	4.41	1445	449.667	-1.77163	down	1.80891e-23	2.28807e-21	At5g04500	--
GLYMA_11G085900	10806	2.19667	8.53	168	722	2.01017	up	1.82395e-23	2.29858e-21	At4g35560	K08518 syntaxin-binding protein 5 | (RefSeq) uncharacterized protein LOC100777534 isoform X1 (A)
GLYMA_01G131500	3901	15.9567	39.92	1114.33	3129.67	1.38733	up	2.16238e-23	2.71506e-21	At5g58380	K07198 5'-AMP-activated protein kinase, catalytic alpha subunit [EC:2.7.11.11] | (RefSeq) CBL-interacting protein kinase 2 (A)
GLYMA_11G181200	2256	29.4167	7.37	842.333	239.667	-1.92836	down	2.35695e-23	2.94852e-21	At2g27310	--
GLYMA_U040600	2951	222.547	48.6	8188.67	1968.33	-2.14029	down	2.74811e-23	3.42531e-21	At4g39830	K00423 L-ascorbate oxidase [EC:1.10.3.3] | (RefSeq) L-ascorbate oxidase (A)
GLYMA_07G260100	1420	0.956667	8.02333	24.3333	234.667	3.14286	up	3.01001e-23	3.73811e-21	At1g11700	--
GLYMA_05G068500	1392	11.2967	52.34	256.667	1318.67	2.26914	up	3.30018e-23	4.08361e-21	At4g17670	--
GLYMA_16G035200	1274	33.5433	145.473	402	2008.33	2.18836	up	3.45539e-23	4.26024e-21	--	--
GLYMA_20G007900	6914	1.62667	8.79	84.6667	511.333	2.48949	up	3.76803e-23	4.62898e-21	At1g49430	K01897 long-chain acyl-CoA synthetase [EC:6.2.1.3] | (RefSeq) long chain acyl-CoA synthetase 2 (A)
GLYMA_13G301400	809	12.96	63.9467	188	1057	2.37111	up	3.83361e-23	4.69266e-21	At4g10270	--
GLYMA_17G047500	1420	11.6767	39.5567	272.333	1049.33	1.831	up	4.24126e-23	5.17313e-21	At5g20700	--
GLYMA_20G041300	3017	3.16333	10.6567	170.333	646.667	1.8161	up	4.38638e-23	5.33109e-21	At3g07040	K13457 disease resistance protein RPM1 | (RefSeq) disease resistance protein RPM1 (A)
GLYMA_08G083400	2331	3.28	14.25	93.6667	449.667	2.1763	up	4.63944e-23	5.61866e-21	At3g05740	K10899 ATP-dependent DNA helicase Q1 [EC:3.6.4.12] | (RefSeq) ATP-dependent DNA helicase Q-like 1 (A)
GLYMA_18G230800	4889	15.1067	4.63	1320	454.667	-1.64239	down	4.67601e-23	5.64294e-21	At4g11610	--
GLYMA_05G195000	1902	37.86	119.853	1007	3583.33	1.72241	up	4.89438e-23	5.88566e-21	At5g63790	--
GLYMA_13G097100	1692	37.0233	100.847	690.333	2120.67	1.51092	up	5.40356e-23	6.47517e-21	At5g38420	K01602 ribulose-bisphosphate carboxylase small chain [EC:4.1.1.39] | (RefSeq) putative ribulose bisphosphate carboxylase small chain (A)
GLYMA_10G118900	1854	9.06667	27.71	301	1038.67	1.67831	up	5.79733e-23	6.92274e-21	At5g61600	K09286 EREBP-like factor | (RefSeq) ethylene-responsive transcription factor ERF105 (A)
GLYMA_12G073000	3411	350.21	90.2167	12778.3	3772	-1.88687	down	6.33344e-23	7.53657e-21	At3g45640	K20536 mitogen-activated protein kinase 3 [EC:2.7.11.24] | (RefSeq) mitogen-activated protein kinase 3 (A)
GLYMA_17G149400	4945	4.45333	16.1233	376.333	1493.67	1.90899	up	7.01758e-23	8.32168e-21	At1g77660	K15082 DNA repair protein RAD7 | (RefSeq) uncharacterized protein LOC100797833 (A)
GLYMA_02G271300	7299	25.4933	67.3067	1629.67	4817.67	1.46334	up	7.48702e-23	8.84764e-21	At3g21620	K21989 calcium permeable stress-gated cation channel | (RefSeq) CSC1-like protein At3g21620 (A)
GLYMA_13G073800	1009	7.45333	52.13	134.667	1101	2.88357	up	7.65348e-23	9.01316e-21	--	--
GLYMA_15G156700	2353	3.59	20.0067	110.667	665	2.52535	up	9.01237e-23	1.0577e-20	At5g44730	--
GLYMA_16G200600	4320	5.70667	25.49	174.333	852.667	2.21283	up	1.11125e-22	1.2997e-20	At5g51830	K00847 fructokinase [EC:2.7.1.4] | (RefSeq) probable fructokinase-7 isoform X1 (A)
GLYMA_13G275300	1133	2.93	16.5467	59.3333	381	2.56893	up	1.30712e-22	1.52358e-20	--	--
GLYMA_05G066600	5326	8.56333	1.67667	349.667	77.6667	-2.28078	down	1.42451e-22	1.65475e-20	At5g04770	K03294 basic amino acid/polyamine antiporter, APA family | (RefSeq) cationic amino acid transporter 1 (A)
GLYMA_13G046300	2033	26.5133	173.097	655.333	4889.67	2.77233	up	1.61966e-22	1.87507e-20	At3g02550	K13945 LOB domain-containing protein 29 | (RefSeq) LOB domain-containing protein 33 (A)
GLYMA_03G223000	2776	160.127	360.677	7952	20048.7	1.23225	up	1.99213e-22	2.29848e-20	At4g01850	K00789 S-adenosylmethionine synthetase [EC:2.5.1.6] | (RefSeq) S-adenosylmethionine synthase 1 (A)
GLYMA_20G098500	3639	1.52667	10.12	46	341.667	2.79043	up	2.06139e-22	2.37039e-20	At2g39470	K02717 photosystem II oxygen-evolving enhancer protein 2 | (RefSeq) psbP-like protein 1, chloroplastic (A)
GLYMA_10G201100	8250	5.38667	22.48	191.333	873.667	2.11543	up	2.13513e-22	2.44695e-20	At3g52990	K00873 pyruvate kinase [EC:2.7.1.40] | (RefSeq) pyruvate kinase 1, cytosolic (A)
GLYMA_07G069700	4607	2.5	12.8733	81	460.667	2.42008	up	2.44455e-22	2.79218e-20	At1g01610	K13508 glycerol-3-phosphate acyltransferase [EC:2.3.1.15 2.3.1.198] | (RefSeq) probable glycerol-3-phosphate acyltransferase 8 (A)
GLYMA_08G064400	1542	0.233333	5.48333	6.33333	168.667	4.6267	up	2.58279e-22	2.94025e-20	--	--
GLYMA_16G013000	1079	138.687	25.21	1937.67	410	-2.38154	down	3.30766e-22	3.75142e-20	At5g49120	--
GLYMA_18G022000	1102	0.293333	8.02667	4.33333	131.667	4.8394	up	3.31731e-22	3.75142e-20	At3g05550	--
GLYMA_03G189500	4079	12.6667	34.52	360.667	1100.33	1.50992	up	3.73413e-22	4.20885e-20	At3g53000	--
GLYMA_07G011900	2132	10.04	53.02	191	1156	2.47013	up	3.82516e-22	4.29727e-20	At1g17710	K13248 pyridoxal phosphate phosphatase PHOSPHO2 [EC:3.1.3.74] | (RefSeq) inorganic pyrophosphatase 2-like (A)
GLYMA_17G019100	10605	10.3367	36.4333	451.333	1740.33	1.8699	up	3.9952e-22	4.47357e-20	At3g23540	K18368 caffeoylshikimate esterase [EC:3.1.1.-] | (RefSeq) caffeoylshikimate esterase isoform X2 (A)
GLYMA_13G145400	3981	2.54667	14.7233	80.6667	536.333	2.60669	up	4.09301e-22	4.56812e-20	At2g36840	--
GLYMA_11G239200	1816	7.52333	23.1767	244.333	831.333	1.67841	up	4.10692e-22	4.56871e-20	At4g39780	K09286 EREBP-like factor | (RefSeq) ethylene-responsive transcription factor ERF060-like (A)
GLYMA_03G196300	850	6.93333	26.3767	105.667	452.333	1.99321	up	4.93088e-22	5.46751e-20	At5g03890	--
GLYMA_01G197900	2581	91.4867	22.14	3367.67	921	-1.98005	down	5.20515e-22	5.75296e-20	At4g37850	K13422 transcription factor MYC2 | (RefSeq) transcription factor MYC1 (A)
GLYMA_15G273000	6125	19.5567	49.22	676	1906.67	1.39514	up	5.2376e-22	5.77015e-20	Hs13540509	K15687 E3 ubiquitin-protein ligase makorin [EC:2.3.2.27] | (RefSeq) E3 ubiquitin-protein ligase makorin isoform X1 (A)
GLYMA_08G273400	2974	2.51333	8.44	123.667	466	1.81249	up	5.92243e-22	6.50363e-20	At4g37890	--
GLYMA_13G149600	4411	11.38	32.4633	289.667	919.667	1.57165	up	6.00436e-22	6.57247e-20	At3g53000	--
GLYMA_18G054600	2806	2.90333	11.4467	118	519.667	2.03769	up	6.30552e-22	6.88007e-20	At2g30360	K12761 carbon catabolite-derepressing protein kinase [EC:2.7.11.1] | (RefSeq) CBL-interacting serine/threonine-protein kinase 14 (A)
GLYMA_20G138800	3976	18.9633	56.0933	747.333	2490	1.62724	up	6.34322e-22	6.89916e-20	At4g38830	K13418 somatic embryogenesis receptor kinase 1 [EC:2.7.10.1 2.7.11.1] | (RefSeq) somatic embryogenesis receptor kinase 2 (A)
GLYMA_13G319000	2008	151.81	45.2733	5445.67	1833.67	-1.68328	down	7.47469e-22	8.10399e-20	At2g27820	K05359 arogenate/prephenate dehydratase [EC:4.2.1.91 4.2.1.51] | (RefSeq) arogenate dehydratase 3 (A)
GLYMA_17G218200	5109	3.84667	13.5567	139	545	1.87473	up	8.39442e-22	9.07235e-20	At2g24270	K00131 glyceraldehyde-3-phosphate dehydrogenase (NADP+) [EC:1.2.1.9] | (RefSeq) ALDH11A3; NADP-dependent glyceraldehyde-3-phosphate dehydrogenase (A)
GLYMA_07G200800	3496	17.47	70.57	487.667	2268.67	2.08526	up	8.83587e-22	9.51932e-20	At5g26990	--
GLYMA_13G099800	990	4.23667	43.2467	75.3333	886.333	3.42094	up	9.29158e-22	9.97881e-20	At3g50800	--
GLYMA_13G069500	2437	7.35	23.26	246	874.667	1.72338	up	1.03372e-21	1.10669e-19	At2g30360	K12761 carbon catabolite-derepressing protein kinase [EC:2.7.11.1] | (RefSeq) CBL-interacting serine/threonine-protein kinase 14 (A)
GLYMA_10G179600	2137	2.86667	9.8	109.667	421.333	1.83679	up	1.10594e-21	1.18032e-19	At4g14580	K12761 carbon catabolite-derepressing protein kinase [EC:2.7.11.1] | (RefSeq) CBL-interacting serine/threonine-protein kinase 4 (A)
GLYMA_14G106200	750	11.97	1.41333	160.667	22	-2.98589	down	1.18328e-21	1.25892e-19	At1g74930	K09286 EREBP-like factor | (RefSeq) DNA-binding domain-containing protein (A)
GLYMA_15G171000	4184	57.8	14.2767	3029.33	836.333	-1.95608	down	1.31204e-21	1.39157e-19	At2g26190	--
GLYMA_14G140400	3474	41.8567	111.873	733	2195	1.47973	up	1.45959e-21	1.54328e-19	At4g32690	--
novel.979	1910	15.52	56.4733	530	2209.33	1.932	up	1.75813e-21	1.8532e-19	At5g12010	--
GLYMA_01G203300	2487	5.43667	18.86	210.333	821.333	1.85735	up	1.90434e-21	2.00114e-19	At4g17680	K19042 E3 ubiquitin-protein ligase BOI and related proteins [EC:2.3.2.27] | (RefSeq) probable BOI-related E3 ubiquitin-protein ligase 2 (A)
GLYMA_09G204500	2748	71.7433	18.9	3526.33	1034.33	-1.86442	down	2.33684e-21	2.44809e-19	At1g32640	K13422 transcription factor MYC2 | (RefSeq) transcription factor MYC1 (A)
GLYMA_15G071200	1982	31.98	101.75	1133	4073.67	1.73137	up	2.39309e-21	2.49936e-19	CE18864	K00422 polyphenol oxidase [EC:1.10.3.1] | (RefSeq) polyphenol oxidase A1, chloroplastic (A)
GLYMA_16G145600	7171	38.03	11.48	1672.67	570	-1.66481	down	2.40072e-21	2.49967e-19	At1g61560	K08472 mlo protein | (RefSeq) MLO-like protein 12 (A)
GLYMA_05G057200	815	76.7667	20.71	1118.67	330.333	-1.84101	down	2.456e-21	2.54946e-19	At1g62510	--
GLYMA_18G103700	2421	10.0267	37.5	134.333	565.333	1.9639	up	2.47085e-21	2.5571e-19	At3g12490	K13899 cystatin-C | (RefSeq) cysteine proteinase inhibitor 4 (A)
GLYMA_05G009100	769	0.753333	19.1233	4.33333	121.333	4.71813	up	3.31082e-21	3.41605e-19	At5g25940	--
GLYMA_01G165600	2201	3.62333	12.7733	108.333	424.333	1.87683	up	3.36513e-21	3.46162e-19	At4g36010	K12173 BRCA1-A complex subunit BRE | (RefSeq) BRISC and BRCA1-A complex member 2 (A)
GLYMA_14G184800	3407	3.99333	23.1433	44.6667	297	2.60618	up	4.19395e-21	4.29378e-19	--	--
GLYMA_14G080400	4294	4.20667	16.1767	265	1118.33	1.99992	up	4.19923e-21	4.29378e-19	At5g42690	--
GLYMA_20G118100	3063	7.41667	0.95	258	35.6667	-2.93368	down	4.46933e-21	4.55631e-19	At1g68390	--
GLYMA_09G282500	20888	0.41	2.28333	42.6667	259.667	2.52709	up	5.26384e-21	5.35031e-19	At1g04600	K10357 myosin V | (RefSeq) myosin-7 (A)
GLYMA_15G065200	3980	39.5367	11.5267	2279.33	749.333	-1.71644	down	5.41283e-21	5.48543e-19	At4g21390	K13430 serine/threonine-protein kinase PBS1 [EC:2.7.11.1] | (RefSeq) serine/threonine protein kinase (A)
GLYMA_04G062900	1333	1.78667	11.79	34.3333	249.667	2.77972	up	6.21918e-21	6.28395e-19	At5g25190	K09286 EREBP-like factor | (RefSeq) ethylene-responsive transcription factor 3 (A)
GLYMA_12G054300	2713	26.7	2.99333	697.333	92.3333	-3.06832	down	6.85496e-21	6.90592e-19	At2g44480	K01188 beta-glucosidase [EC:3.2.1.21] | (RefSeq) cyanogenic beta-glucosidase isoform X1 (A)
GLYMA_16G173700	7616	5.85333	15.5	365.333	1073	1.46353	up	7.86976e-21	7.90494e-19	At1g64110	K22530 ATPase family AAA domain-containing protein 1 [EC:3.6.1.-] | (RefSeq) outer mitochondrial transmembrane helix translocase (A)
GLYMA_06G031000	1283	33.07	197.637	537.667	3742.33	2.65588	up	8.06266e-21	8.07495e-19	At1g19530	--
GLYMA_03G141700	3748	9.79667	26.7867	464	1406.33	1.51005	up	8.84033e-21	8.82792e-19	At2g42280	--
GLYMA_19G255300	5171	30.6	8.67	1890.67	602	-1.75942	down	8.96539e-21	8.9267e-19	At2g46430	K05391 cyclic nucleotide gated channel, plant | (RefSeq) cyclic nucleotide-gated ion channel 1 (A)
GLYMA_04G212000	1262	3.49	22.37	52	385.667	2.75922	up	9.35494e-21	9.2875e-19	At5g64530	--
GLYMA_13G248800	3814	12.2133	3.15333	666.333	196.333	-1.88239	down	1.01146e-20	1.00126e-18	At4g21390	K13430 serine/threonine-protein kinase PBS1 [EC:2.7.11.1] | (RefSeq) serine/threonine protein kinase (A)
GLYMA_02G125600	2733	200.533	51.1667	8093	2315.67	-1.90916	down	1.25586e-20	1.2396e-18	At2g14960	K14487 auxin responsive GH3 gene family | (RefSeq) probable indole-3-acetic acid-amido synthetase GH3.1 (A)
GLYMA_04G111600	4239	4.57	14.87	212	780.667	1.76845	up	1.42958e-20	1.407e-18	At4g10170	--
GLYMA_18G259000	4388	8.86	38.8	522.667	2553.67	2.18549	up	1.46514e-20	1.43786e-18	At5g39780	--
GLYMA_11G100100	3321	0.926667	7.55	38.3333	361	3.09851	up	1.55049e-20	1.51726e-18	At5g23190	K15402 fatty acid omega-hydroxylase [EC:1.14.-.-] | (RefSeq) cytochrome P450 86B1 (A)
GLYMA_18G110200	2330	10.4767	2.23	436.333	104	-2.17	down	1.82527e-20	1.78105e-18	At3g59080	K22683 aspartyl protease family protein [EC:3.4.23.-] | (RefSeq) aspartyl protease family protein 2 (A)
GLYMA_13G365300	2756	0.376667	5.75333	14	254	4.02675	up	2.03653e-20	1.98152e-18	At1g80130	--
GLYMA_09G160100	7435	12.6967	4.12667	766	278	-1.55901	down	2.15984e-20	2.09553e-18	At1g17830	--
GLYMA_02G001500	3295	0.623333	5.19333	22.3333	204.333	3.11273	up	2.60226e-20	2.51763e-18	At2g26640	K15397 3-ketoacyl-CoA synthase [EC:2.3.1.199] | (RefSeq) 3-ketoacyl-CoA synthase 11 (A)
GLYMA_01G238800	5721	28.3267	93.0933	1028.33	3782.67	1.7731	up	2.63149e-20	2.53872e-18	At5g26340	K24193 MFS transporter, SP family, sugar:H+ symporter | (RefSeq) sugar transport protein 13 (A)
GLYMA_19G231800	1664	4.18667	14.53	106.333	414	1.85781	up	2.86676e-20	2.75791e-18	At3g05600	--
GLYMA_10G246800	1966	3.32333	15.9767	61.6667	331.667	2.32329	up	3.13667e-20	3.00909e-18	At3g22620	--
GLYMA_02G128800	2050	48.47	12.2367	1618.67	466.667	-1.91772	down	3.40691e-20	3.25918e-18	At1g13480	--
GLYMA_04G091600	2251	0.726667	3.96667	29.3333	177.333	2.50129	up	3.42951e-20	3.27164e-18	At5g49700	--
GLYMA_09G242600	1106	29.1433	6.82	576	154.333	-2.02386	down	3.78613e-20	3.60178e-18	At2g44840	K09286 EREBP-like factor | (RefSeq) ethylene-responsive transcription factor 1 (A)
GLYMA_02G135100	3001	46.2767	9.23	1143	263	-2.24701	down	3.89695e-20	3.69691e-18	At1g49570	K00430 peroxidase [EC:1.11.1.7] | (RefSeq) peroxidase 10 (A)
GLYMA_13G088400	3803	9.52333	2.87667	449.667	150.333	-1.67369	down	4.45393e-20	4.21359e-18	At5g65160	K09527 DnaJ homolog subfamily C member 7 | (RefSeq) TPR repeat-containing thioredoxin TTL1 isoform X1 (A)
GLYMA_16G148600	1860	16.5067	117.527	250.333	2076	2.90192	up	4.54928e-20	4.29191e-18	At3g26690	K07766 diphosphoinositol-polyphosphate diphosphatase [EC:3.6.1.52] | (RefSeq) nudix hydrolase 12, mitochondrial (A)
GLYMA_09G235400	4995	83.28	184.43	3029.67	7536.33	1.20979	up	5.26851e-20	4.95675e-18	At3g01120	K01739 cystathionine gamma-synthase [EC:2.5.1.48] | (RefSeq) CGS2; cystathionine-gamma-synthase (A)
GLYMA_20G102200	2070	5.18333	15.5167	151	505.333	1.64315	up	5.53093e-20	5.18935e-18	At5g08350	--
GLYMA_01G040400	9012	97.7933	34.8533	3692.67	1478.33	-1.42503	down	6.16609e-20	5.76943e-18	At1g27100	--
GLYMA_18G294800	4143	15.64	4.18	910.333	278	-1.83313	down	6.56322e-20	6.12423e-18	At1g66880	K20718 LRR receptor-like serine/threonine-protein kinase ERECTA [EC:2.7.11.1] | (RefSeq) LRR receptor-like serine/threonine-protein kinase ERL1 (A)
GLYMA_19G140800	4736	85.66	32.96	3384	1469.67	-1.31361	down	7.08838e-20	6.59625e-18	At3g57530	K13412 calcium-dependent protein kinase [EC:2.7.11.1] | (RefSeq) calcium-dependent protein kinase 32 (A)
GLYMA_04G228700	2936	150.17	36.4267	6022.67	1643.33	-1.98212	down	7.4326e-20	6.89778e-18	At1g64720	--
GLYMA_13G296900	18799	41.3467	125.603	2409	8026	1.65714	up	7.5795e-20	7.00683e-18	At4g03560	K16900 two pore calcium channel protein, plant | (RefSeq) two pore calcium channel protein 1B (A)
GLYMA_07G129000	2423	1.24333	8.14667	40.3333	294	2.77512	up	7.59114e-20	7.00683e-18	At2g19590	K05933 aminocyclopropanecarboxylate oxidase [EC:1.14.17.4] | (RefSeq) 1-aminocyclopropane-1-carboxylate oxidase 1 (A)
GLYMA_09G022500	2343	130.17	37.9933	3362.33	1069.67	-1.72748	down	8.16784e-20	7.51881e-18	At5g06720	K00430 peroxidase [EC:1.11.1.7] | (RefSeq) peroxidase family protein precursor (A)
GLYMA_10G210600	3553	26.5933	62.14	1202.67	3131.67	1.28482	up	8.47842e-20	7.78374e-18	At4g30080	K14486 auxin response factor | (RefSeq) auxin response factor 19 (A)
GLYMA_03G201200	624	193.85	48.9767	2164.67	625.667	-1.91378	down	8.75104e-20	8.01248e-18	At2g35980	--
GLYMA_12G162700	568	23.2333	75.6933	162.333	598	1.77097	up	8.93859e-20	8.16232e-18	At3g15210	K09286 EREBP-like factor | (RefSeq) ethylene-responsive transcription factor 4 (A)
GLYMA_07G155500	1027	74.5867	261.717	1372	5447.67	1.87473	up	9.3712e-20	8.53454e-18	At2g38310	K14496 abscisic acid receptor PYR/PYL family | (RefSeq) abscisic acid receptor PYL4 (A)
GLYMA_18G011600	3115	16.5233	44.4	456.667	1354.33	1.48085	up	9.62301e-20	8.74056e-18	At1g67730_2	K10251 17beta-estradiol 17-dehydrogenase / very-long-chain 3-oxoacyl-CoA reductase [EC:1.1.1.62 1.1.1.330] | (RefSeq) uncharacterized protein LOC100817128 (A)
GLYMA_15G093100	2941	68.7267	19.3733	973	313	-1.75722	down	1.04567e-19	9.47258e-18	At2g34600	--
GLYMA_06G293400	2741	1.55	6.01	76	331.667	2.01817	up	1.18906e-19	1.07431e-17	At4g03510	K10666 E3 ubiquitin-protein ligase RNF5 [EC:2.3.2.27] | (RefSeq) uncharacterized protein LOC100786373 (A)
GLYMA_11G248600	2612	1.1	6.39333	30.3333	194.667	2.59619	up	1.42096e-19	1.28044e-17	At1g67570	--
GLYMA_14G074700	5363	25.4533	58.1233	1902	4852.67	1.25275	up	1.4436e-19	1.29741e-17	At2g16250	K13416 brassinosteroid insensitive 1-associated receptor kinase 1 [EC:2.7.10.1 2.7.11.1] | (RefSeq) BRASSINOSTEROID INSENSITIVE 1-associated receptor kinase 1 (A)
GLYMA_14G051800	1270	0.336667	4.95333	7.66667	129	3.94876	up	1.64439e-19	1.47399e-17	At2g44310	--
GLYMA_17G064800	1573	2.77	15.83	53	349.667	2.59043	up	1.72599e-19	1.54309e-17	At2g35760	--
GLYMA_20G214200	3107	86.2967	29.1833	2085.33	801.667	-1.49471	down	1.91411e-19	1.70681e-17	At4g33420	K00430 peroxidase [EC:1.11.1.7] | (RefSeq) peroxidase superfamily protein (A)
GLYMA_11G062300	8203	8.02333	2.21667	479.333	146.333	-1.80123	down	2.01261e-19	1.78996e-17	At4g36870	--
GLYMA_08G068100	6795	0.503333	3.61	22	178.667	2.9123	up	2.03916e-19	1.80887e-17	At5g09550	K17255 Rab GDP dissociation inhibitor | (RefSeq) guanosine nucleotide diphosphate dissociation inhibitor At5g09550 isoform X2 (A)
GLYMA_04G238100	1308	19.0567	71.2233	219	927.667	1.97325	up	2.22268e-19	1.96655e-17	At5g53190	K15382 solute carrier family 50 (sugar transporter) | (RefSeq) SWEET7; bidirectional sugar transporter SWEET3 (A)
GLYMA_15G057500	778	11.82	71.3133	163.667	1106.33	2.64537	up	2.84422e-19	2.50997e-17	--	--
GLYMA_06G297800	863	8.19333	32.3833	126.667	573.667	2.05622	up	2.96304e-19	2.60809e-17	At4g10270	--
GLYMA_06G170100	1629	1.82	10.22	46.6667	293.667	2.54924	up	3.21671e-19	2.82409e-17	At1g67340	--
GLYMA_03G171700	2661	12.5633	3.18667	299.333	86.3333	-1.90448	down	4.09964e-19	3.59002e-17	At3g53720	--
GLYMA_09G280200	4105	4.11	0.706667	284.667	55.6667	-2.46592	down	4.50362e-19	3.9337e-17	At2g38470	K13424 WRKY transcription factor 33 | (RefSeq) probable WRKY transcription factor 33 (A)
GLYMA_17G213600	5930	15.2867	55.04	743	2955.67	1.90363	up	4.53747e-19	3.95316e-17	At4g32060	K22827 calcium uptake protein 1, mitochondrial | (RefSeq) calcium uptake protein, mitochondrial (A)
GLYMA_10G028100	1588	1.89333	15.1533	28.6667	262.667	3.0689	up	5.02956e-19	4.37072e-17	At2g48130	--
GLYMA_04G055600	4075	1.66333	9.19333	66.3333	398.667	2.51535	up	5.1629e-19	4.47521e-17	At2g41510	K00279 cytokinin dehydrogenase [EC:1.5.99.12] | (RefSeq) cytokinin dehydrogenase 7 isoform X1 (A)
GLYMA_06G142900	1540	12.1433	3.15667	334.667	97	-1.88281	down	5.32576e-19	4.60469e-17	At5g05250	--
GLYMA_16G023900	2691	12.04	3.60333	579.333	194.667	-1.67571	down	5.49717e-19	4.74089e-17	At1g01260	K13422 transcription factor MYC2 | (RefSeq) transcription factor MYC2 (A)
GLYMA_07G129300	1411	21.2067	55.4467	535	1565	1.44581	up	5.6446e-19	4.85578e-17	At2g19570	K01489 cytidine deaminase [EC:3.5.4.5] | (RefSeq) cytidine deaminase 1 (A)
GLYMA_02G063900	6877	32.5133	6.80333	1435.67	346	-2.1825	down	5.79675e-19	4.97414e-17	At1g61560	K08472 mlo protein | (RefSeq) MLO-like protein 12 (A)
GLYMA_20G210100	1689	4.82667	17.27	146	589.667	1.90421	up	6.38771e-19	5.4675e-17	At1g03220	K22683 aspartyl protease family protein [EC:3.4.23.-] | (RefSeq) aspartyl protease family protein 2 (A)
GLYMA_19G000700	2642	21.41	68.7233	848	2983.33	1.73627	up	6.78329e-19	5.79157e-17	At5g08570	K00873 pyruvate kinase [EC:2.7.1.40] | (RefSeq) pyruvate kinase (A)
GLYMA_05G190100	1694	1.39	12.7567	34.3333	363.333	3.27942	up	7.21604e-19	6.14569e-17	At2g38820	--
GLYMA_07G199800	6055	128.673	34.0933	5696.33	1737.67	-1.84277	down	7.64804e-19	6.49741e-17	At1g28380	--
GLYMA_09G009000	4478	1.61333	8.72	60	355.667	2.48967	up	8.03473e-19	6.80899e-17	At4g22290_1	--
GLYMA_01G210500	4042	5.81333	0.79	216	31.3333	-2.85617	down	8.603e-19	7.27252e-17	At1g12110	K14638 solute carrier family 15 (peptide/histidine transporter), member 3/4 | (RefSeq) protein NRT1/ PTR FAMILY 8.3 (A)
GLYMA_13G098400	2203	5.56	0.623333	123.333	16	-3.06053	down	8.73639e-19	7.36704e-17	At2g18980	K00430 peroxidase [EC:1.11.1.7] | (RefSeq) peroxidase 16 (A)
GLYMA_01G036000	2253	12.09	91.1	363.667	3058.33	2.96403	up	9.77184e-19	8.2199e-17	At1g24100	K11820 N-hydroxythioamide S-beta-glucosyltransferase [EC:2.4.1.195] | (RefSeq) UDP-glycosyltransferase 74B1 (A)
GLYMA_20G116700	784	33.8467	5.09667	474.333	83.3333	-2.64555	down	9.8495e-19	8.26487e-17	At1g25400	--
GLYMA_13G296800	408	32.5567	118.72	238.333	976.333	1.93058	up	1.02563e-18	8.58517e-17	At4g28310	--
GLYMA_13G064300	4513	12.92	60.9167	453.667	2388	2.299	up	1.13824e-18	9.50441e-17	At5g39890	K23953 plant cysteine oxidase [EC:1.13.11.-] | (RefSeq) plant cysteine oxidase 2 (A)
GLYMA_06G184300	1402	9.32333	30.7233	234	878.333	1.78803	up	1.14306e-18	9.5214e-17	At5g62860_2	--
GLYMA_13G323800	2619	19.3933	97.4067	731	4161.33	2.38705	up	1.35223e-18	1.12363e-16	At5g60770	K02575 MFS transporter, NNP family, nitrate/nitrite transporter | (RefSeq) NRT2; NRT2 protein (A)
GLYMA_03G134500	1428	5.86667	28.8833	150.667	816	2.35694	up	1.44702e-18	1.19948e-16	At2g36780	K13495 cis-zeatin O-glucosyltransferase [EC:2.4.1.215] | (RefSeq) zeatin O-glucosyltransferase (A)
GLYMA_12G185200	4699	0.416667	2.43667	30.3333	196	2.61194	up	1.50063e-18	1.24091e-16	At2g27500	K19891 glucan endo-1,3-beta-glucosidase 1/2/3 [EC:3.2.1.39] | (RefSeq) glucan endo-1,3-beta-glucosidase 1 isoform X1 (A)
GLYMA_13G249700	2066	9.04667	54.56	149.333	1034.33	2.66201	up	1.60267e-18	1.32208e-16	At5g54500	K03809 NAD(P)H dehydrogenase (quinone) [EC:1.6.5.2] | (RefSeq) probable NAD(P)H dehydrogenase (quinone) FQR1-like 1 (A)
GLYMA_16G077400	1718	64.7	14.4167	1987	507	-2.09566	down	1.63199e-18	1.34303e-16	At1g52140	--
GLYMA_07G199900	2915	44.6933	121.673	2332.33	7167.67	1.50807	up	1.82555e-18	1.4987e-16	CE01921	K08770 ubiquitin C | (RefSeq) polyubiquitin 3 (A)
GLYMA_18G205400	1476	5.20333	27.91	82	508.667	2.49846	up	1.90605e-18	1.56104e-16	--	--
GLYMA_08G249700	3727	22.9433	53.9	768.333	2019.67	1.29256	up	1.93962e-18	1.58474e-16	At3g02210	--
GLYMA_09G203200	1036	13.2533	41.6	223.667	797.667	1.72114	up	1.98773e-18	1.62017e-16	At5g65660	--
GLYMA_12G031300	4523	2.91333	11.3133	197.667	835.667	2.00558	up	1.99777e-18	1.62447e-16	At4g34950	--
GLYMA_14G080800	11075	11.5	26.1767	1106.67	2805.33	1.2461	up	2.06886e-18	1.67828e-16	At4g11800	--
GLYMA_05G146300	4965	3.93	10.63	256.333	772	1.49658	up	2.07432e-18	1.67872e-16	At1g67530	--
GLYMA_17G114700	2914	6.00667	22.8767	163.333	692.667	1.98912	up	2.10579e-18	1.70016e-16	At2g26660	--
GLYMA_14G083000	4641	3.90667	13.9767	117.667	478.333	1.90999	up	2.18095e-18	1.75571e-16	At5g42900	--
GLYMA_19G190000	1989	14.9933	118.95	534.667	4617.33	3.03377	up	2.18486e-18	1.75571e-16	At3g10040	--
GLYMA_20G248100	2846	61.4067	212.047	2009.33	7770.67	1.8467	up	2.25571e-18	1.80838e-16	At1g05800_2	K12126 phytochrome-interacting factor 3 | (RefSeq) transcription factor PIF3 (A)
GLYMA_18G206000	4470	5.42333	18.39	434.667	1663.33	1.82498	up	2.71084e-18	2.16816e-16	At2g38310	K14496 abscisic acid receptor PYR/PYL family | (RefSeq) abscisic acid receptor PYL4 (A)
GLYMA_10G278600	1947	8.98667	35.0633	140	628.333	2.03762	up	2.77631e-18	2.21534e-16	--	--
GLYMA_19G217800	1980	1.40667	9.00333	37.3333	272.667	2.75467	up	2.97088e-18	2.36507e-16	At2g47260	K13424 WRKY transcription factor 33 | (RefSeq) WRKY62; WRKY transcription factor 62 (A)
GLYMA_01G166100	5556	72.88	24.0633	3045.67	1144.67	-1.53084	down	2.98697e-18	2.37235e-16	At5g66210	K13412 calcium-dependent protein kinase [EC:2.7.11.1] | (RefSeq) calcium-dependent protein kinase 28 (A)
GLYMA_17G108200	3604	7.67	20.6733	297.333	887.667	1.48603	up	3.23994e-18	2.5673e-16	At5g34940	K07964 heparanase [EC:3.2.1.166] | (RefSeq) heparanase-like protein precursor (A)
GLYMA_17G028400	1192	1.86333	10.31	39.6667	248	2.53038	up	3.27237e-18	2.58699e-16	At3g16720	K19038 E3 ubiquitin-protein ligase ATL41 [EC:2.3.2.27] | (RefSeq) RING-H2 finger protein ATL40 (A)
GLYMA_13G327900	899	0.246667	12.0267	2.33333	123	5.65831	up	3.68158e-18	2.90377e-16	--	--
GLYMA_12G044600	3101	182.513	59.69	6305.67	2257	-1.56099	down	3.90079e-18	3.06958e-16	At1g49320	--
GLYMA_03G102700	6896	12.94	29.1033	763.333	1931.67	1.23251	up	4.34351e-18	3.4101e-16	At3g60180	K13800 UMP-CMP kinase [EC:2.7.4.14] | (RefSeq) UMP-CMP kinase family protein (A)
GLYMA_08G018300	1818	4.46667	24.3633	110	700	2.52265	up	4.93164e-18	3.86297e-16	At4g23550	K13426 WRKY transcription factor 29 | (RefSeq) probable WRKY transcription factor 29 (A)
GLYMA_07G258100	1064	5.44333	33.44	70.6667	504	2.6938	up	5.10405e-18	3.98887e-16	At5g19190	--
GLYMA_15G201800	1765	1.33	8.44	25.6667	187	2.74565	up	5.78865e-18	4.51356e-16	At2g15580	K11982 E3 ubiquitin-protein ligase RNF115/126 [EC:2.3.2.27] | (RefSeq) E3 ubiquitin-protein ligase RING1 (A)
GLYMA_15G084100	2259	1.92333	8.79667	78	399.333	2.2549	up	6.4881e-18	5.04742e-16	At4g18700	K07198 5'-AMP-activated protein kinase, catalytic alpha subunit [EC:2.7.11.11] | (RefSeq) CBL-interacting protein kinase 2 (A)
GLYMA_18G081100	3811	10.7233	3.04333	731	236.667	-1.74625	down	6.58989e-18	5.11495e-16	At5g48150	K14494 DELLA protein | (RefSeq) DELLA protein DWARF8 (A)
GLYMA_12G022700	2312	16.1833	3.72667	365.667	95.3333	-2.04874	down	6.83098e-18	5.29006e-16	At2g17040	--
GLYMA_03G208200	1869	27.7267	5.17	586.667	127.333	-2.34379	down	7.33769e-18	5.66961e-16	At1g05260	K00430 peroxidase [EC:1.11.1.7] | (RefSeq) peroxidase 3 (A)
GLYMA_16G033900	6808	9.87333	2.86667	1141	371.333	-1.7198	down	7.49809e-18	5.78047e-16	At5g36930	K13457 disease resistance protein RPM1 | (RefSeq) disease resistance protein (A)
GLYMA_01G234900	1244	34.4633	96.4233	547.333	1731	1.54727	up	7.55572e-18	5.81178e-16	At3g22600	--
GLYMA_15G245100	3667	0.02	12.14	0.666667	436.667	9.24531	up	7.81155e-18	5.99506e-16	At3g14630	K17873 11-oxo-beta-amyrin 30-oxidase [EC:1.14.14.115] | (RefSeq) 11-oxo-beta-amyrin 30-oxidase (A)
GLYMA_08G271900	2704	34.0833	11.4033	1649	607.333	-1.52556	down	8.25892e-18	6.31156e-16	At1g32640	K13422 transcription factor MYC2 | (RefSeq) transcription factor MYC2 (A)
GLYMA_10G186700	1539	6.89333	32.5933	189.333	994.333	2.2997	up	8.26091e-18	6.31156e-16	--	--
GLYMA_05G247900	2850	1.24667	6.14	55.6667	312	2.36916	up	8.34606e-18	6.36238e-16	At3g17790	K14379 tartrate-resistant acid phosphatase type 5 [EC:3.1.3.2] | (RefSeq) purple acid phosphatase 17-like (A)
GLYMA_17G011600	1805	58.48	17.1933	1432	481.333	-1.69257	down	8.93197e-18	6.79387e-16	At1g62280	--
GLYMA_16G053300	2738	2.89	15.22	105.333	637	2.46224	up	9.33365e-18	7.08361e-16	At5g41040	K15400 omega-hydroxypalmitate O-feruloyl transferase [EC:2.3.1.188] | (RefSeq) omega-hydroxypalmitate O-feruloyl transferase (A)
GLYMA_09G238200	4945	21.4867	4.37667	503.333	115.667	-2.22946	down	9.69327e-18	7.34023e-16	At4g18910	K09874 aquaporin NIP | (RefSeq) NIP2-1; putative Si transporter NIP2-1 (A)
GLYMA_15G179600	2625	769.23	242.43	17484.7	6140.33	-1.60515	down	1.02119e-17	7.71588e-16	At1g19180	K13464 jasmonate ZIM domain-containing protein | (RefSeq) protein TIFY 10A (A)
GLYMA_13G051600	2489	51.0233	8.19667	1794	339.667	-2.55247	down	1.10928e-17	8.36291e-16	At4g39950	K20496 laurate 7-monooxygenase [EC:1.14.14.130] | (RefSeq) cytochrome P450 703A2 (A)
GLYMA_04G249000	2912	37.5067	105.803	1652.33	5242	1.55666	up	1.1574e-17	8.70654e-16	At1g01720	--
GLYMA_03G236300	6831	513.06	133.52	29219	8454.33	-1.88379	down	1.19659e-17	8.98149e-16	At1g09090	K13447 respiratory burst oxidase [EC:1.6.3.- 1.11.1.-] | (RefSeq) respiratory burst oxidase homolog protein B (A)
GLYMA_07G153800	4778	97.1267	28.43	4012.33	1343	-1.70521	down	1.2123e-17	9.0795e-16	At2g38290	K03320 ammonium transporter, Amt family | (RefSeq) AMT2.1; ammonium transporter AMT2.1 (A)
GLYMA_08G078900	1236	0.35	4.45333	7.66667	107.333	3.72766	up	1.21521e-17	9.08136e-16	At5g06860	--
GLYMA_15G079100	1443	4.01	14.2933	103.333	417.667	1.89926	up	1.2356e-17	9.21359e-16	At5g47220	K13433 pathogenesis-related genes transcriptional activator PTI5 | (RefSeq) pathogenesis-related genes transcriptional activator PTI5 (A)
GLYMA_04G136600	865	60.5133	16.6867	936.333	297	-1.78203	down	1.27119e-17	9.4583e-16	At1g76650	K13448 calcium-binding protein CML | (RefSeq) putative calcium-binding protein (A)
GLYMA_14G073300	1964	77.4233	284.397	1704.33	7157.67	1.94327	up	1.54766e-17	1.14904e-15	At2g02360	--
GLYMA_04G162400	2396	4.36	0.786667	186.667	37.6667	-2.40594	down	1.66524e-17	1.23365e-15	At5g61010	K07195 exocyst complex component 7 | (RefSeq) exocyst complex component EXO70E2 (A)
GLYMA_12G130200	3114	73.7333	13.6533	2503.67	543	-2.35241	down	1.69238e-17	1.25104e-15	At2g44480	K01188 beta-glucosidase [EC:3.2.1.21] | (RefSeq) cyanogenic beta-glucosidase (A)
GLYMA_12G200500	1158	24.3567	169.623	505.333	4094	2.87094	up	1.77846e-17	1.31183e-15	At4g10270	--
GLYMA_06G249700	1979	51.13	16.7767	1172.33	431.333	-1.54603	down	1.97159e-17	1.45116e-15	At5g54370	--
GLYMA_02G261900	1167	19.0233	72.0767	397.667	1719.67	1.98886	up	2.11523e-17	1.55353e-15	At2g38310	K14496 abscisic acid receptor PYR/PYL family | (RefSeq) abscisic acid receptor PYL4 (A)
GLYMA_08G355200	3070	0.946667	7.11333	52.3333	441.667	2.96877	up	2.19823e-17	1.61103e-15	At5g24080	K13415 protein brassinosteroid insensitive 1 [EC:2.7.10.1 2.7.11.1] | (RefSeq) BRI1B; brassinosteroid receptor precursor (A)
GLYMA_17G236700	3979	5.20333	18.76	168.333	675.333	1.91441	up	2.3522e-17	1.72018e-15	At4g24230	--
GLYMA_20G159700	3049	3.34	0.233333	93	7.33333	-3.76715	down	2.69712e-17	1.9682e-15	At5g52400	K20661 cytochrome P450 family 714 subfamily A1 | (RefSeq) cytochrome P450 714A1 (A)
GLYMA_20G070100	1602	2.06667	14.0033	59.3333	472.333	2.84374	up	2.74724e-17	2.00051e-15	At5g07580	K09286 EREBP-like factor | (RefSeq) ethylene-responsive transcription factor ERF105 (A)
GLYMA_14G221800	1109	5.98333	16.93	118.667	377	1.56477	up	2.75858e-17	2.00449e-15	At5g42200	K19037 E3 ubiquitin-protein ligase ATL23 [EC:2.3.2.27] | (RefSeq) E3 ubiquitin-protein ligase ATL23 (A)
GLYMA_03G220800	2028	6.96667	21.5333	182.667	643.667	1.6994	up	3.04218e-17	2.20587e-15	At2g47260	K18835 WRKY transcription factor 2 | (RefSeq) WRKY59; probable WRKY transcription factor 2 (A)
GLYMA_05G147100	2584	21.6267	5.99	740	235.333	-1.77654	down	3.06522e-17	2.21787e-15	At1g13710	K20619 cytochrome P450 family 78 subfamily A | (RefSeq) cytochrome P450 78A5 (A)
GLYMA_01G219100	7772	2.81667	0.396667	158	25.6667	-2.74281	down	3.08341e-17	2.22631e-15	At1g63440	K17686 P-type Cu+ transporter [EC:7.2.2.8] | (RefSeq) probable copper-transporting ATPase HMA5 isoform X1 (A)
GLYMA_20G199300	1400	0.26	4.89667	4.66667	102	4.32325	up	3.2295e-17	2.32687e-15	At3g24310	K09422 transcription factor MYB, plant | (RefSeq) MYB-like transcription factor EOBI (A)
GLYMA_12G054700	7934	3.73	0.923333	204.333	57	-1.94701	down	3.35042e-17	2.40892e-15	At3g45140	K00454 lipoxygenase [EC:1.13.11.12] | (RefSeq) linoleate 13S-lipoxygenase 2-1, chloroplastic (A)
GLYMA_19G003600	1509	3.5	15.98	94.6667	492.667	2.25942	up	3.57238e-17	2.56311e-15	At4g32170	K15402 fatty acid omega-hydroxylase [EC:1.14.-.-] | (RefSeq) cytochrome P450 86B1 (A)
GLYMA_20G125200	1585	103.937	37.8367	2948.33	1195.33	-1.39721	down	3.67782e-17	2.63322e-15	At2g01290	K01807 ribose 5-phosphate isomerase A [EC:5.3.1.6] | (RefSeq) probable ribose-5-phosphate isomerase 2 (A)
GLYMA_05G026100	2431	1.99	11.5733	53.6667	354.333	2.60352	up	3.72947e-17	2.66462e-15	At1g74460	--
GLYMA_08G180400	5276	8.02333	1.93667	364	98.3333	-1.99105	down	4.01535e-17	2.86288e-15	At4g08620	K17470 sulfate transporter 1, high-affinity | (RefSeq) high affinity sulfate transporter 2 (A)
GLYMA_11G170000	1754	0.12	4.18667	2.66667	104.333	5.18481	up	4.07269e-17	2.89772e-15	At2g30040	K20716 mitogen-activated protein kinase kinase kinase 17/18 | (RefSeq) mitogen-activated protein kinase kinase kinase 18 (A)
GLYMA_17G117800	1825	18.63	4.84333	607.333	180.667	-1.87241	down	4.33915e-17	3.08088e-15	At5g20050	K13416 brassinosteroid insensitive 1-associated receptor kinase 1 [EC:2.7.10.1 2.7.11.1] | (RefSeq) BRASSINOSTEROID INSENSITIVE 1-associated receptor kinase 1 (A)
GLYMA_10G128900	3115	2.42	0.256667	134.667	16.3333	-3.14602	down	4.53445e-17	3.21288e-15	At2g34930	K20718 LRR receptor-like serine/threonine-protein kinase ERECTA [EC:2.7.11.1] | (RefSeq) LRR receptor-like serine/threonine-protein kinase ERECTA precursor (A)
GLYMA_07G096000	1098	2.57	20.1867	50.3333	427.333	3.02302	up	5.41869e-17	3.83145e-15	At1g18390	--
GLYMA_01G118000	3538	0.0533333	3.09667	2.33333	133	5.79305	up	5.45238e-17	3.8473e-15	At5g01320	K01568 pyruvate decarboxylase [EC:4.1.1.1] | (RefSeq) pyruvate decarboxylase 2 (A)
GLYMA_17G066900	1852	0.413333	3.16667	13.6667	118	3.00335	up	5.56152e-17	3.91623e-15	At5g24920	--
GLYMA_13G203000	6223	1.44667	9.59333	68	499.667	2.77603	up	5.68434e-17	3.99448e-15	At3g08040	--
GLYMA_13G149700	2232	14.3667	80.5233	575	3558	2.53871	up	6.44087e-17	4.51681e-15	At3g10040	--
GLYMA_04G149300	2968	41.0733	14.32	2178	850	-1.46053	down	6.58294e-17	4.60698e-15	At2g26640	K15397 3-ketoacyl-CoA synthase [EC:2.3.1.199] | (RefSeq) 3-ketoacyl-CoA synthase 11 (A)
GLYMA_08G285900	3266	77.8567	210.327	2911.33	8960.67	1.4997	up	6.66207e-17	4.65282e-15	At1g60420	K17609 nucleoredoxin [EC:1.8.1.8] | (RefSeq) probable nucleoredoxin 1 (A)
GLYMA_10G016500	1755	30.5733	91.6333	916.667	3015.67	1.63792	up	7.04621e-17	4.91107e-15	At3g16770	K09286 EREBP-like factor | (RefSeq) uncharacterized protein LOC100780763 (A)
GLYMA_08G044400	4279	42.16	13.56	1577.33	565	-1.57798	down	7.56363e-17	5.26096e-15	At1g73800	--
GLYMA_19G227800	3085	1.70333	10.6933	41.3333	296	2.71141	up	7.71181e-17	5.35313e-15	At1g56600	K18819 inositol 3-alpha-galactosyltransferase [EC:2.4.1.123] | (RefSeq) galactinol synthase 2 (A)
GLYMA_11G043000	3507	7.07333	27.1367	443.667	1957.67	2.00806	up	7.83719e-17	5.42912e-15	At2g35290	--
GLYMA_19G188100	3765	20.4567	3.05667	722	126	-2.65967	down	8.45714e-17	5.84673e-15	At2g36690	K24028 salicylic acid 3-hydroxylase [EC:1.14.11.-] | (RefSeq) protein DMR6-LIKE OXYGENASE 2 isoform X1 (A)
GLYMA_20G210800	1691	8.01	34.1467	242.333	1161	2.14887	up	8.50146e-17	5.86549e-15	At4g14580	K12761 carbon catabolite-derepressing protein kinase [EC:2.7.11.1] | (RefSeq) CBL-interacting serine/threonine-protein kinase 4 (A)
GLYMA_19G180300	1910	0.733333	8.12	18.6667	244.333	3.55408	up	8.58257e-17	5.8982e-15	At1g69490	--
GLYMA_20G220800	1026	333.167	86.2267	5598	1657.67	-1.87687	down	8.58341e-17	5.8982e-15	At3g05950	--
GLYMA_18G238200	2098	58.7433	139.66	1611.67	4338.67	1.31537	up	8.6818e-17	5.95383e-15	At4g01250	K13425 WRKY transcription factor 22 | (RefSeq) WRKY10; WRKY transcription factor 10 (A)
GLYMA_01G193600	5870	231.597	99.4267	16489	7931	-1.15672	down	8.7958e-17	6.01992e-15	At4g37640	K01537 P-type Ca2+ transporter type 2C [EC:7.2.2.10] | (RefSeq) SCA1; plasma membrane Ca2+-ATPase (A)
GLYMA_17G016300	3854	34.0533	120.653	604.333	2416.33	1.89125	up	9.00114e-17	6.14814e-15	At5g19140	--
GLYMA_03G149400	3522	11.2433	29.8833	457	1351.67	1.46849	up	9.17355e-17	6.25339e-15	At5g13320	K14487 auxin responsive GH3 gene family | (RefSeq) probable indole-3-acetic acid-amido synthetase GH3.6 (A)
GLYMA_13G257600	697	6.51333	47.3633	80.6667	654	2.91032	up	9.66786e-17	6.57723e-15	--	--
GLYMA_15G234700	7953	2.05	12.6933	61	429.333	2.6961	up	9.77977e-17	6.63272e-15	At1g22360	K13692 UDP-glucose:(indol-3-yl)acetate beta-D-glucosyltransferase [EC:2.4.1.121] | (RefSeq) UDP-glycosyltransferase 84B2 (A)
GLYMA_10G179400	3003	4.06	18.1033	164.667	819	2.2095	up	9.78827e-17	6.63272e-15	At2g26640	K15397 3-ketoacyl-CoA synthase [EC:2.3.1.199] | (RefSeq) 3-ketoacyl-CoA synthase 11 (A)
GLYMA_13G171500	321	15.7533	0.946667	90.3333	6	-4.00592	down	1.03246e-16	6.98232e-15	--	--
GLYMA_11G082700	4496	163.07	48.7267	6267.33	2139.67	-1.67558	down	1.0708e-16	7.2273e-15	At1g47670	K24917 amino acid permease | (RefSeq) amino acid permease 8 (A)
GLYMA_19G231900	1720	6.83667	22.5767	171.667	619.333	1.77527	up	1.09526e-16	7.37781e-15	At3g05600	--
GLYMA_12G032800	1885	15.3067	42.2733	376	1155.33	1.52338	up	1.11774e-16	7.51436e-15	At5g53300	K06689 ubiquitin-conjugating enzyme E2 D [EC:2.3.2.23] | (RefSeq) uncharacterized protein LOC100499741 (A)
GLYMA_12G047500	3441	77.9833	229.083	1792.67	6034.33	1.6241	up	1.16099e-16	7.78982e-15	At2g15970	--
GLYMA_07G056900	3875	31.7233	98.6767	832.333	2966.33	1.70896	up	1.25033e-16	8.37277e-15	At1g01360	K14496 abscisic acid receptor PYR/PYL family | (RefSeq) uncharacterized protein LOC100810273 (A)
GLYMA_17G246500	2795	280.47	75.0333	14014.7	4262	-1.83701	down	1.25876e-16	8.41278e-15	At5g42650	K01723 hydroperoxide dehydratase [EC:4.2.1.92] | (RefSeq) AOS2; allene oxide synthase (A)
GLYMA_08G015800	2772	12.7167	3.17	414.667	116.667	-1.93793	down	1.26332e-16	8.42673e-15	At5g52430	--
GLYMA_16G038100	650	2.51667	87.8533	29.3333	1175.33	5.18908	up	1.28501e-16	8.55468e-15	--	--
GLYMA_19G184100	2115	6.29333	17.83	185.333	591.667	1.56555	up	1.34643e-16	8.94619e-15	At2g36950	K07213 copper chaperone | (RefSeq) copper chaperone homolog CCH (A)
GLYMA_02G062700	705	7.52333	23.79	95	336	1.72327	up	1.38998e-16	9.21762e-15	At3g50410	--
GLYMA_09G145700	4038	17.17	69.0933	472	2189.33	2.07961	up	1.43191e-16	9.47727e-15	At3g61060	--
GLYMA_10G224500	2114	90.3	35.1333	3414.33	1491	-1.29823	down	1.45272e-16	9.5964e-15	At1g18740	--
GLYMA_18G018200	1775	11.1867	39.19	356	1408.33	1.87271	up	1.46763e-16	9.67613e-15	At4g39780	K09286 EREBP-like factor | (RefSeq) ethylene-responsive transcription factor ERF060 (A)
GLYMA_16G008600	2624	39.2667	100.957	1387.67	4034.33	1.42604	up	1.53214e-16	1.00691e-14	At5g07990	K20623 typhasterol/6-deoxotyphasterol 2alpha-hydroxylase | (RefSeq) dimethylnonatriene synthase (A)
GLYMA_02G067500	4315	6.76	49.1267	169.333	1439	2.93129	up	1.53313e-16	1.00691e-14	At3g26690	K07766 diphosphoinositol-polyphosphate diphosphatase [EC:3.6.1.52] | (RefSeq) nudix hydrolase 12, mitochondrial (A)
novel.197	5567	9.67333	32.1167	536	1943.67	1.78087	up	1.56817e-16	1.02795e-14	At5g60710	--
GLYMA_12G204100	616	39.5767	9.00667	235.667	61.6667	-2.05514	down	1.58362e-16	1.03609e-14	--	--
GLYMA_02G029900	2284	0.38	3.67667	11.3333	122.333	3.33755	up	1.60755e-16	1.04973e-14	At1g24100	K11820 N-hydroxythioamide S-beta-glucosyltransferase [EC:2.4.1.195] | (RefSeq) UDP-glycosyltransferase 74B1 (A)
GLYMA_11G091400	938	18.6667	75.2333	289.333	1353	2.08585	up	1.62925e-16	1.06187e-14	At4g38580	K07213 copper chaperone | (RefSeq) uncharacterized protein LOC100305622 (A)
GLYMA_15G180000	1202	3.73333	15.4533	80.3333	383.667	2.12568	up	1.65614e-16	1.07734e-14	At1g19210	K09286 EREBP-like factor | (RefSeq) ethylene-responsive transcription factor ERF023 (A)
GLYMA_15G033100	1803	4.98333	13.3133	161	480.667	1.47996	up	1.67012e-16	1.08437e-14	At5g13070	--
GLYMA_17G053600	3633	65.9433	21.11	3254.67	1174	-1.57966	down	1.76288e-16	1.14242e-14	At2g26190	--
GLYMA_02G100300	4798	15.0233	4.19667	622.667	199.333	-1.76441	down	1.80286e-16	1.16613e-14	At5g38280	K13430 serine/threonine-protein kinase PBS1 [EC:2.7.11.1] | (RefSeq) serine/threonine-protein kinase PBS1 isoform X2 (A)
GLYMA_04G167300	2620	21.9867	54.02	471	1309.33	1.36234	up	1.88703e-16	1.21826e-14	At1g18720	--
GLYMA_19G144200	2920	8.76333	21.1167	316.667	853.667	1.33217	up	1.90516e-16	1.22764e-14	At2g42280	K12126 phytochrome-interacting factor 3 | (RefSeq) transcription factor PIF3 (A)
GLYMA_02G247600	5413	24.4967	54.5267	1244	3115.67	1.21649	up	1.92367e-16	1.23723e-14	At1g07570	K13430 serine/threonine-protein kinase PBS1 [EC:2.7.11.1] | (RefSeq) serine/threonine protein kinase (A)
GLYMA_20G181500	6583	3.77667	10.49	150	470.333	1.54063	up	2.32735e-16	1.49406e-14	At5g04250	K13717 OTU domain-containing protein 3 [EC:3.4.19.12] | (RefSeq) OVARIAN TUMOR DOMAIN-containing deubiquitinating enzyme 7 isoform X1 (A)
GLYMA_01G186200	10459	0.233333	2.53	8.33333	102.333	3.51004	up	2.37546e-16	1.52208e-14	At5g67030	K09838 zeaxanthin epoxidase [EC:1.14.15.21] | (RefSeq) zeaxanthin epoxidase, chloroplastic-like (A)
GLYMA_19G199500	5129	10.91	25.6567	768	1999.33	1.29054	up	2.53541e-16	1.62152e-14	At2g35940	--
GLYMA_12G061900	3018	7.25667	1.95667	391.333	115.667	-1.84166	down	2.70106e-16	1.72423e-14	At1g07530	K14494 DELLA protein | (RefSeq) DELLA protein 1 (A)
GLYMA_15G223500	4595	5.65	0.643333	246.333	29.3333	-3.11666	down	2.73768e-16	1.74435e-14	At3g10720	K01051 pectinesterase [EC:3.1.1.11] | (RefSeq) probable pectinesterase/pectinesterase inhibitor 47 (A)
GLYMA_06G115800	4613	36.47	5.48333	1436.67	251	-2.64975	down	2.78085e-16	1.76856e-14	At1g15960	K21398 natural resistance-associated macrophage protein 2 | (RefSeq) NRAMP6B; metal transporter Nramp6 (A)
GLYMA_03G122000	4661	20.2467	46.1667	687.333	1739	1.24738	up	2.87692e-16	1.82626e-14	At2g40890	K09754 5-O-(4-coumaroyl)-D-quinate 3'-monooxygenase [EC:1.14.14.96] | (RefSeq) cytochrome P450 98A2 (A)
GLYMA_18G003200	1773	14.1533	36.77	349.333	1000.33	1.43225	up	2.89794e-16	1.83618e-14	At3g23730	K08235 xyloglucan:xyloglucosyl transferase [EC:2.4.1.207] | (RefSeq) xyloglucan endotransglucosylase/hydrolase 2 (A)
GLYMA_09G275100	5169	14.4133	3.58333	998	275	-1.9521	down	2.99782e-16	1.89595e-14	At3g08760	K13430 serine/threonine-protein kinase PBS1 [EC:2.7.11.1] | (RefSeq) serine/threonine-protein kinase (A)
GLYMA_04G009400	1371	395.91	1137.12	7703.33	25406.3	1.59429	up	3.03582e-16	1.91644e-14	At1g76180	--
GLYMA_06G031100	1153	9.54667	49.7467	134	796.667	2.45194	up	3.28304e-16	2.06868e-14	At1g19530	--
GLYMA_05G216000	901	132.173	343.847	2127.67	6287	1.44602	up	3.40481e-16	2.14146e-14	--	--
GLYMA_05G058100	2611	113.803	428.913	3671.67	15298.7	1.96725	up	3.44447e-16	2.16242e-14	At4g17260	K00016 L-lactate dehydrogenase [EC:1.1.1.27] | (RefSeq) L-lactate dehydrogenase B (A)
GLYMA_13G338300	1908	11.21	2.24667	278.667	63.6667	-2.24659	down	3.4869e-16	2.18504e-14	At1g55910	K14709 solute carrier family 39 (zinc transporter), member 1/2/3 | (RefSeq) zinc transporter 1 (A)
GLYMA_08G170400	2045	3.98667	13.1533	129.333	486	1.79295	up	3.75716e-16	2.35008e-14	At3g12920	K19042 E3 ubiquitin-protein ligase BOI and related proteins [EC:2.3.2.27] | (RefSeq) probable BOI-related E3 ubiquitin-protein ligase 3 (A)
GLYMA_02G054900	823	40.9967	7.76333	603	133.667	-2.31914	down	4.00131e-16	2.49822e-14	At4g36500	--
GLYMA_14G183800	20071	13.23	30.5867	316.667	820.333	1.27179	up	4.13727e-16	2.57839e-14	At4g37940	K09264 MADS-box transcription factor, plant | (RefSeq) MADS-box transcription factor 23 isoform X2 (A)
GLYMA_08G183600	2125	5.13667	15.9867	94.3333	331.667	1.70553	up	4.3246e-16	2.69023e-14	At1g03970	K14432 ABA responsive element binding factor | (RefSeq) BZIP81; transcription factor bZIP81 (A)
GLYMA_08G281600	880	253.837	576.793	3993.67	10266.7	1.2481	up	4.39205e-16	2.72722e-14	--	--
GLYMA_10G019400	15554	19.1233	44.7533	1531.33	3944	1.28192	up	4.49874e-16	2.7884e-14	At1g02890_2	K22530 ATPase family AAA domain-containing protein 1 [EC:3.6.1.-] | (RefSeq) outer mitochondrial transmembrane helix translocase (A)
GLYMA_02G260600	2701	34.58	80.1433	936.667	2461.33	1.27929	up	4.65314e-16	2.87887e-14	At2g40410	--
GLYMA_02G265900	849	14.03	60.24	212.667	1043	2.16455	up	4.73421e-16	2.92374e-14	At2g44310	--
GLYMA_01G211900	3736	5.30667	15.9433	265	885	1.64157	up	5.05333e-16	3.11519e-14	At4g22730	K13416 brassinosteroid insensitive 1-associated receptor kinase 1 [EC:2.7.10.1 2.7.11.1] | (RefSeq) BRASSINOSTEROID INSENSITIVE 1-associated receptor kinase 1 isoform X1 (A)
GLYMA_19G098500	2723	12.6667	50.0267	318.333	1368.67	2.03296	up	5.30565e-16	3.26484e-14	At3g02040	K18696 glycerophosphodiester phosphodiesterase [EC:3.1.4.46] | (RefSeq) glycerophosphodiester phosphodiesterase GDPD1, chloroplastic (A)
GLYMA_17G216800	1570	5.55333	19.9467	156.333	642.333	1.91827	up	5.52623e-16	3.39446e-14	At5g10970	--
GLYMA_08G320700	2260	23.1733	7.87667	937.333	363.333	-1.48513	down	5.87088e-16	3.59968e-14	At1g50640	K09286 EREBP-like factor | (RefSeq) ethylene-responsive transcription factor 3 (A)
GLYMA_07G046800	7857	21.57	43.77	1049.67	2387.33	1.08261	up	6.83579e-16	4.1838e-14	At1g53730	K13430 serine/threonine-protein kinase PBS1 [EC:2.7.11.1] | (RefSeq) serine/threonine-protein kinase PBS1 isoform X2 (A)
GLYMA_13G301800	273	66.8733	287.367	326.333	1613.33	2.16989	up	6.96432e-16	4.25484e-14	At4g10270	--
GLYMA_18G025700	1482	5.36667	14.57	142.333	430	1.50011	up	7.08232e-16	4.3192e-14	At3g11110	K19038 E3 ubiquitin-protein ligase ATL41 [EC:2.3.2.27] | (RefSeq) RING-H2 finger protein ATL40 (A)
GLYMA_02G000800	1415	23	3.01667	464	71.3333	-2.84873	down	7.78299e-16	4.73805e-14	At5g43650	--
GLYMA_16G219500	3268	2.46667	8.81	99	401.667	1.90123	up	7.86628e-16	4.78023e-14	At1g59960	K22374 3''-deamino-3''-oxonicotianamine reductase [EC:1.1.1.285] | (RefSeq) CHR2; chalcone reductase CHR2 (A)
GLYMA_07G092700	1871	0.306667	3.87667	6	85.3333	3.7254	up	8.15056e-16	4.94419e-14	At1g73830	K12126 phytochrome-interacting factor 3 | (RefSeq) transcription factor PIF3 (A)
GLYMA_03G127800	946	0.393333	5.15	6.66667	97.6667	3.76867	up	8.17187e-16	4.94833e-14	At2g41180	--
GLYMA_02G095900	5335	3.28333	7.81	229	610.667	1.31251	up	8.57772e-16	5.18489e-14	At2g39440_2	--
GLYMA_17G145300	1111	83.42	243.233	1657.33	5537	1.61204	up	9.79789e-16	5.91197e-14	At5g47230	K09286 EREBP-like factor | (RefSeq) ethylene-responsive transcription factor 5-like (A)
GLYMA_14G153500	4849	4.28333	1.02667	296.667	78.3333	-2.00795	down	9.85756e-16	5.93749e-14	At1g77380	K24917 amino acid permease | (RefSeq) amino acid permease 3 (A)
GLYMA_17G145900	1878	54.0833	10.9033	1816	425.667	-2.23398	down	1.00683e-15	6.05318e-14	At4g16820	K16818 phospholipase A1 [EC:3.1.1.32] | (RefSeq) phospholipase A(1) DAD1, chloroplastic (A)
GLYMA_20G241800	1918	45.6	17.8733	1003.67	441.667	-1.28943	down	1.00851e-15	6.05318e-14	At5g05340	K00430 peroxidase [EC:1.11.1.7] | (RefSeq) cationic peroxidase 1 (A)
GLYMA_09G203400	2440	5.21333	14.2267	151.667	458.667	1.50573	up	1.05905e-15	6.3454e-14	At4g37890	--
GLYMA_09G203000	1906	4.75	14.9167	126.333	449	1.7211	up	1.06721e-15	6.38304e-14	At5g65640	K13422 transcription factor MYC2 | (RefSeq) transcription factor MYC1 (A)
GLYMA_08G153700	709	136.917	410.32	1735.67	5980.33	1.65339	up	1.16789e-15	6.97303e-14	--	--
GLYMA_03G122900	8976	5.53333	1.27	226.667	56.3333	-2.08911	down	1.20033e-15	7.15422e-14	At1g68570	K14638 solute carrier family 15 (peptide/histidine transporter), member 3/4 | (RefSeq) protein NRT1/ PTR FAMILY 3.1 (A)
GLYMA_03G052400	3372	10.2833	3.71	620.333	247	-1.41651	down	1.24086e-15	7.38287e-14	At1g47890	--
GLYMA_10G271200	10543	24.7867	8.76	1868.67	727.667	-1.44744	down	1.31521e-15	7.79814e-14	At1g25390	K20718 LRR receptor-like serine/threonine-protein kinase ERECTA [EC:2.7.11.1] | (RefSeq) LRR receptor-like serine/threonine-protein kinase ERECTA (A)
GLYMA_14G089800	2129	4	27.47	151.333	1195.67	2.84206	up	1.31522e-15	7.79814e-14	--	--
GLYMA_08G147200	1859	4.41333	12.1067	146.667	447.667	1.5151	up	1.39617e-15	8.26379e-14	At5g64660	--
GLYMA_10G188500	4491	12.0267	39.43	968.667	3468.33	1.76557	up	1.51122e-15	8.92928e-14	At3g23150	K14509 ethylene receptor [EC:2.7.13.-] | (RefSeq) ethylene receptor 2 (A)
GLYMA_02G234600	1488	2.21667	8.53	54	235.333	2.01252	up	1.52148e-15	8.97439e-14	At2g40470	K13944 LOB domain-containing protein 16 | (RefSeq) LOB domain-containing protein 16 (A)
GLYMA_04G092400	5543	39.4033	78.4233	1943	4306.33	1.0518	up	1.54479e-15	9.09614e-14	At4g24620	K01810 glucose-6-phosphate isomerase [EC:5.3.1.9] | (RefSeq) glucose-6-phosphate isomerase 1, chloroplastic (A)
GLYMA_07G071300	7501	13.3033	31.4033	392.333	1036.33	1.29992	up	1.56076e-15	9.17439e-14	At4g00520	K01068 acyl-coenzyme A thioesterase 1/2/4 [EC:3.1.2.2] | (RefSeq) acyl-CoA thioesterase 2 isoform X2 (A)
GLYMA_15G098100	2859	50.06	113.407	1825	4666.67	1.24695	up	1.57458e-15	9.23972e-14	At5g18670	K01177 beta-amylase [EC:3.2.1.2] | (RefSeq) beta-amylase 1, chloroplastic (A)
GLYMA_16G125100	7174	2.61	0.546667	199.333	45.6667	-2.21598	down	1.71032e-15	1.0019e-13	At2g17820	K14489 arabidopsis histidine kinase 2/3/4 (cytokinin receptor) [EC:2.7.13.3] | (RefSeq) histidine kinase 3 (A)
GLYMA_20G163200	2369	12.4233	3.4	472.667	145.667	-1.80353	down	1.77799e-15	1.03976e-13	At5g52830	K13425 WRKY transcription factor 22 | (RefSeq) probable WRKY transcription factor 27 (A)
GLYMA_07G209200	960	3.10333	17.21	53.3333	346.333	2.55588	up	1.85137e-15	1.07938e-13	--	--
GLYMA_09G254400	1881	0.8	7.45333	15.3333	163.667	3.28986	up	1.85206e-15	1.07938e-13	At5g41570	K13424 WRKY transcription factor 33 | (RefSeq) WRKY62; WRKY transcription factor 62 (A)
GLYMA_05G183800	4631	7.38	21.4467	326.333	1035.67	1.5918	up	1.89203e-15	1.10079e-13	At2g03800	K09716 D-aminoacyl-tRNA deacylase [EC:3.1.1.96] | (RefSeq) uncharacterized protein LOC100808796 (A)
GLYMA_20G137300	3494	2.46667	8.65	108.333	434.667	1.88394	up	1.92955e-15	1.11985e-13	At4g38830	K13430 serine/threonine-protein kinase PBS1 [EC:2.7.11.1] | (RefSeq) serine/threonine-protein kinase PBS1 isoform X2 (A)
GLYMA_15G107300	749	4.38667	22.96	58.6667	358.667	2.46912	up	1.93135e-15	1.11985e-13	--	--
GLYMA_02G024200	8084	78.9567	29.75	3105.33	1321	-1.34258	down	2.0152e-15	1.16649e-13	At1g27100	--
GLYMA_06G138100	3357	238.21	85.97	9900	4044.33	-1.40236	down	2.03906e-15	1.17831e-13	At4g35580	--
GLYMA_15G104000	6482	24.4933	55.4633	644.667	1645.67	1.24412	up	2.08851e-15	1.20484e-13	At1g03260	--
GLYMA_13G301700	1215	34.27	176	744	4454	2.43069	up	2.16437e-15	1.24506e-13	At4g10270	--
GLYMA_18G287200	1040	15.8033	74.1533	293.667	1618	2.30796	up	2.16551e-15	1.24506e-13	At2g28710	--
GLYMA_08G059700	3684	111.303	312.933	3710	11945.7	1.56103	up	2.42106e-15	1.38965e-13	At1g11260	K24193 MFS transporter, SP family, sugar:H+ symporter | (RefSeq) sugar carrier protein C (A)
GLYMA_19G114700	3308	58.91	197.623	3484.67	13558.7	1.82071	up	2.54431e-15	1.45794e-13	--	--
GLYMA_19G201000	4130	105.153	43.5367	5665	2634	-1.20929	down	2.7016e-15	1.54548e-13	At3g11760	--
GLYMA_19G212800	6134	59.6233	129.37	3310	8140	1.18381	up	2.81278e-15	1.60639e-13	At4g02280	K00695 sucrose synthase [EC:2.4.1.13] | (RefSeq) sucrose synthase 2 isoform X2 (A)
GLYMA_08G018800	2129	1.21333	4.93	36	164	2.08554	up	2.84065e-15	1.6196e-13	At5g41590	--
GLYMA_18G294600	1033	17.37	4.27	260.333	70.3333	-1.97495	down	2.88312e-15	1.64107e-13	At5g38210	--
GLYMA_01G013900	3431	14.2633	32.3833	386.333	984.667	1.24424	up	2.938e-15	1.66953e-13	At1g32170	K08235 xyloglucan:xyloglucosyl transferase [EC:2.4.1.207] | (RefSeq) probable xyloglucan endotransglucosylase/hydrolase protein 30 (A)
GLYMA_14G220000	6720	25.3	56.6533	1058.33	2686	1.22995	up	2.94547e-15	1.67099e-13	At1g20080	--
GLYMA_15G124900	7450	24.1433	8.30333	1497.33	581	-1.47559	down	3.23225e-15	1.83064e-13	At5g49760	K13430 serine/threonine-protein kinase PBS1 [EC:2.7.11.1] | (RefSeq) serine/threonine-protein kinase (A)
GLYMA_15G256500	1853	3.14667	12.8433	86	403	2.09869	up	3.30931e-15	1.87118e-13	At3g12920	K19042 E3 ubiquitin-protein ligase BOI and related proteins [EC:2.3.2.27] | (RefSeq) probable BOI-related E3 ubiquitin-protein ligase 3 (A)
GLYMA_17G230600	4368	5.81333	24.0633	160	762.667	2.12293	up	3.37073e-15	1.90276e-13	At1g03590	K14497 protein phosphatase 2C [EC:3.1.3.16] | (RefSeq) protein phosphatase 2C 37 (A)
GLYMA_01G096600	2894	7.93333	2.52333	411	146.667	-1.58847	down	3.41047e-15	1.92202e-13	At1g32640	K13422 transcription factor MYC2 | (RefSeq) transcription factor MYC2 (A)
GLYMA_07G086400	1931	0.986667	6.34333	16.3333	117.333	2.74988	up	3.55582e-15	2.00063e-13	At3g24520	K09419 heat shock transcription factor, other eukaryote | (RefSeq) heat stress transcription factor C-1 (A)
GLYMA_02G249300	2510	0.846667	5.09	28.6667	190.667	2.64698	up	3.64816e-15	2.04921e-13	At3g11430	K13508 glycerol-3-phosphate acyltransferase [EC:2.3.1.15 2.3.1.198] | (RefSeq) glycerol-3-phosphate acyltransferase 5 (A)
GLYMA_03G068600	2882	5.98667	1.59667	308.667	89.6667	-1.86573	down	3.66828e-15	2.05713e-13	At3g55550	K13416 brassinosteroid insensitive 1-associated receptor kinase 1 [EC:2.7.10.1 2.7.11.1] | (RefSeq) BRASSINOSTEROID INSENSITIVE 1-associated receptor kinase 1 isoform X1 (A)
GLYMA_01G183000	1744	3.89	11.02	121.333	381	1.55925	up	3.96272e-15	2.21861e-13	At5g65590	--
GLYMA_15G207700	4496	1.62667	7.01667	43.6667	209.667	2.16623	up	4.10036e-15	2.29191e-13	At1g18490	K23953 plant cysteine oxidase [EC:1.13.11.-] | (RefSeq) plant cysteine oxidase 3 (A)
GLYMA_01G165300	1882	15.55	37.12	325	877.667	1.32319	up	4.15319e-15	2.31445e-13	At2g17850	K22547 arsenate reductase [EC:1.20.4.1] | (RefSeq) protein HIGH ARSENIC CONTENT 1-like (A)
GLYMA_12G211000	13580	16.0567	32.17	836.667	1870.33	1.06388	up	4.15424e-15	2.31445e-13	At3g58640	K04424 sterile alpha motif and leucine zipper containing kinase AZK [EC:2.7.11.25] | (RefSeq) probable serine/threonine-protein kinase SIS8 isoform X1 (A)
GLYMA_02G261600	4230	2.38667	6.88	92.6667	300	1.59045	up	4.22793e-15	2.35166e-13	At2g40370	K05909 laccase [EC:1.10.3.2] | (RefSeq) laccase-5 (A)
GLYMA_03G202400	2463	34.5967	89.52	1524.67	4479.67	1.43688	up	4.23974e-15	2.3544e-13	At4g10800	--
GLYMA_16G135500	5354	3.66667	0.443333	234.667	34.3333	-2.93046	down	4.28664e-15	2.37658e-13	At5g36930	K13457 disease resistance protein RPM1 | (RefSeq) disease resistance protein RPM1 (A)
GLYMA_16G019900	6692	8.85333	2.95667	370	137	-1.52494	down	4.34287e-15	2.40292e-13	At2g46760	K00103 L-gulonolactone oxidase [EC:1.1.3.8] | (RefSeq) probable L-gulonolactone oxidase 6 (A)
GLYMA_18G297000	3717	0.436667	3.51333	18.6667	171	3.0737	up	4.34821e-15	2.40292e-13	--	--
GLYMA_13G260100	810	17.0467	72.6533	247.333	1229	2.16938	up	4.36209e-15	2.40669e-13	--	--
GLYMA_20G236300	1310	3.64667	19.1333	53.3333	322.667	2.46662	up	4.64445e-15	2.55424e-13	At5g27690	--
GLYMA_14G049600	6648	4.62333	14.68	143.667	506.667	1.72325	up	4.64448e-15	2.55424e-13	At1g05000	K18045 tyrosine-protein phosphatase SIW14 [EC:3.1.3.48] | (RefSeq) probable tyrosine-protein phosphatase DSP4 isoform X1 (A)
GLYMA_03G115300	2895	13.87	43.2967	514	1746	1.69249	up	4.77453e-15	2.62154e-13	At1g11680	K05917 sterol 14alpha-demethylase [EC:1.14.14.154 1.14.15.36] | (RefSeq) obtusifoliol 14-alpha demethylase (A)
GLYMA_18G288900	1049	26.0367	57.3633	489	1199.33	1.20065	up	4.8042e-15	2.63359e-13	At1g65520	K07517 Delta3-Delta2-enoyl-CoA isomerase [EC:5.3.3.8] | (RefSeq) enoyl-CoA delta isomerase 1, peroxisomal (A)
GLYMA_15G057400	333	6.29333	31.33	37.3333	209	2.37448	up	4.87468e-15	2.66795e-13	--	--
GLYMA_01G212100	1377	3.17667	11.0633	73	289.667	1.86912	up	5.16406e-15	2.82181e-13	At2g45360	--
GLYMA_16G156200	4152	10.9233	3.81333	674	262	-1.46199	down	5.18089e-15	2.82648e-13	At1g34420	K00924 kinase [EC:2.7.1.-] | (RefSeq) NARK; nodule autoregulation receptor kinase precursor (A)
GLYMA_09G006700	1287	3.17333	0.146667	73	3.66667	-4.40642	down	5.41493e-15	2.94839e-13	At4g04480	--
GLYMA_17G131900	1075	124.41	42.04	2391.67	926.667	-1.494	down	5.42161e-15	2.94839e-13	At4g25480	K09286 EREBP-like factor | (RefSeq) AP2 domain transcription factor TINY (A)
GLYMA_15G208600	4342	2.26333	13.2167	80.6667	508.333	2.58736	up	5.45435e-15	2.96148e-13	At1g23080	K13947 auxin efflux carrier family protein | (RefSeq) auxin efflux carrier component (A)
GLYMA_06G029100	5240	15.0467	31.3233	1099.67	2572	1.1202	up	5.52184e-15	2.99336e-13	At1g75410	--
GLYMA_04G097700	4325	6.28333	17.73	205.333	640.333	1.55218	up	5.64033e-15	3.05275e-13	At5g65380	K03327 multidrug resistance protein, MATE family | (RefSeq) protein DETOXIFICATION 27 (A)
GLYMA_06G142200	905	2.12	12.27	34.3333	230.333	2.60943	up	5.68979e-15	3.07465e-13	--	--
GLYMA_17G007900	3049	4.45	12.1867	235	728.667	1.51764	up	5.76503e-15	3.11038e-13	At2g23140	K08332 vacuolar protein 8 | (RefSeq) U-box domain-containing protein 15-like (A)
GLYMA_14G016000	3408	7.95333	23.6467	485	1609.67	1.62904	up	5.81706e-15	3.13351e-13	At5g48150	K14494 DELLA protein | (RefSeq) DELLA protein 1 (A)
GLYMA_11G234100	1077	2.46667	11.6467	36	194	2.30855	up	5.83401e-15	3.13769e-13	At5g27690	K07213 copper chaperone | (RefSeq) copper transport protein ATX1 (A)
GLYMA_13G267700	1796	1.04	8.05333	20.6667	178	3.00713	up	6.10278e-15	3.27708e-13	At3g56400	K13424 WRKY transcription factor 33 | (RefSeq) WRKY39; WRKY transcription factor 39 (A)
GLYMA_19G161500	6922	32.2633	72.5633	1588.67	3950.67	1.22499	up	6.2818e-15	3.36414e-13	At1g06780	K13648 alpha-1,4-galacturonosyltransferase [EC:2.4.1.43] | (RefSeq) probable galacturonosyltransferase 6 isoform X1 (A)
GLYMA_03G204100	4351	28.1767	8.46	1194.67	408.667	-1.66811	down	6.28461e-15	3.36414e-13	At2g38910	K13412 calcium-dependent protein kinase [EC:2.7.11.1] | (RefSeq) calcium-dependent protein kinase 26 (A)
GLYMA_19G242600	1991	17.83	38.3567	635.333	1533	1.16725	up	6.40457e-15	3.42299e-13	At5g28040	--
GLYMA_07G189000	3866	3.07333	12.1433	199.333	856.667	2.03359	up	6.48748e-15	3.46188e-13	At4g05150	--
GLYMA_20G102300	1171	18.9967	60.7067	311	1131.67	1.74302	up	6.50223e-15	3.46434e-13	At5g08350	--
GLYMA_14G217200	3877	35.2333	16.37	2029	1056.33	-1.04341	down	6.54317e-15	3.48072e-13	At4g38900	K20557 transcription factor VIP1 | (RefSeq) putative bZIP domain class transcription factor (A)
GLYMA_07G188000	1510	2.44333	9.48667	40	175.333	2.02339	up	6.82727e-15	3.6262e-13	At5g54530	--
GLYMA_12G053800	6524	400.98	183.14	14646.3	7412.67	-1.07196	down	6.89924e-15	3.65874e-13	At2g44450	K01188 beta-glucosidase [EC:3.2.1.21] | (RefSeq) ICHG; isoflavone conjugate-specific beta-glucosidase (A)
GLYMA_11G087600	1418	5.74	15.2667	145.667	436.667	1.47686	up	7.01783e-15	3.71193e-13	At1g76410	K19040 E3 ubiquitin-protein ligase ATL10/75/76/77/78 [EC:2.3.2.27] | (RefSeq) RING-H2 finger protein (A)
GLYMA_14G175400	2323	170.043	637.217	5523	24009	1.97847	up	7.02128e-15	3.71193e-13	At1g22360	K13691 pathogen-inducible salicylic acid glucosyltransferase [EC:2.4.1.-] | (RefSeq) UDP-glycosyltransferase 74G1 (A)
GLYMA_20G036100	2498	0.0666667	5.70667	1.33333	119	6.43147	up	7.1057e-15	3.75015e-13	At2g02990	K01166 ribonuclease T2 [EC:4.6.1.19] | (RefSeq) putative ribonuclease 1 precursor (A)
GLYMA_08G254200	3753	26.68	66.78	1116.33	3160.67	1.38912	up	7.11553e-15	3.75015e-13	At3g30390	K14207 solute carrier family 38 (sodium-coupled neutral amino acid transporter), member 2 | (RefSeq) amino acid transporter AVT6A (A)
GLYMA_11G053100	1795	13.5933	3.83667	325	101.667	-1.77119	down	7.24338e-15	3.81165e-13	At2g23320	K13425 WRKY transcription factor 22 | (RefSeq) WRKY10; WRKY transcription factor 10 (A)
GLYMA_08G329300	1739	10.5167	32.8867	327.667	1175.33	1.71742	up	7.52107e-15	3.95169e-13	At4g14540	K08065 nuclear transcription Y subunit beta | (RefSeq) nuclear transcription factor Y subunit B-3 (A)
GLYMA_19G024500	2221	0.106667	2.12	3.33333	73.6667	4.36766	up	7.72914e-15	4.05477e-13	At5g61430	--
GLYMA_13G095300	1451	45.9333	112.057	962.667	2649.33	1.34968	up	7.91619e-15	4.14653e-13	At4g25810	K14504 xyloglucan:xyloglucosyl transferase TCH4 [EC:2.4.1.207] | (RefSeq) probable xyloglucan endotransglucosylase/hydrolase protein 23 (A)
GLYMA_05G195200	858	12.5933	48.5933	192.667	852.667	2.01479	up	8.2343e-15	4.30655e-13	At3g14880	K14431 transcription factor TGA | (RefSeq) TGA21; transcription factor TGA7 isoform X2 (A)
GLYMA_10G017600	1409	84.2633	223.127	1142	3456.67	1.47387	up	8.37951e-15	4.37579e-13	At4g02380	--
GLYMA_19G218300	6777	0.836667	3.21667	46.6667	197.667	1.99574	up	8.90033e-15	4.64067e-13	At2g47240	K01897 long-chain acyl-CoA synthetase [EC:6.2.1.3] | (RefSeq) long chain acyl-CoA synthetase 1 (A)
GLYMA_01G225800	4306	104.427	249.043	3287.33	8915	1.32067	up	9.84217e-15	5.12393e-13	At4g10960	K01784 UDP-glucose 4-epimerase [EC:5.1.3.2] | (RefSeq) UDP-glucose 4-epimerase GEPI48 (A)
GLYMA_09G140800	1449	3.82	23.6933	99	702.667	2.69578	up	9.96252e-15	5.17869e-13	At3g05200	K10664 E3 ubiquitin-protein ligase ATL6/9/15/31/42/55 [EC:2.3.2.27] | (RefSeq) E3 ubiquitin-protein ligase ATL31 (A)
GLYMA_02G208500	3574	12.02	32.6733	333.667	1037	1.51449	up	1.06067e-14	5.50518e-13	At1g78290	K14498 serine/threonine-protein kinase SRK2 [EC:2.7.11.1] | (RefSeq) serine/threonine-protein kinase SAPK2 (A)
GLYMA_19G096100	3977	1.41	5.4	80	345	1.99831	up	1.06571e-14	5.52295e-13	At5g41040	K15400 omega-hydroxypalmitate O-feruloyl transferase [EC:2.3.1.188] | (RefSeq) omega-hydroxypalmitate O-feruloyl transferase (A)
GLYMA_09G049300	2027	5.53333	1.27667	180.333	46.3333	-2.05683	down	1.06851e-14	5.52907e-13	At4g37360	K13260 isoflavone/4'-methoxyisoflavone 2'-hydroxylase [EC:1.14.14.90 1.14.14.89] | (RefSeq) I2'H; isoflavone 2'-hydroxylase (A)
GLYMA_06G020800	1794	73.7067	21.04	2363.33	768.667	-1.73956	down	1.08703e-14	5.61634e-13	At1g76070	--
GLYMA_13G270100	2012	87.71	183.257	3154.67	7433	1.12596	up	1.08889e-14	5.61634e-13	At1g78860	--
GLYMA_12G182600	4078	7.51667	1.97	255.667	72.6667	-1.89204	down	1.09031e-14	5.61634e-13	At3g44610	K08286 protein-serine/threonine kinase [EC:2.7.11.-] | (RefSeq) serine/threonine-protein kinase D6PKL3 (A)
GLYMA_17G010500	6109	38.1867	78.3767	2442	5600	1.09797	up	1.09821e-14	5.64851e-13	At4g04340	K21989 calcium permeable stress-gated cation channel | (RefSeq) calcium permeable stress-gated cation channel 1 (A)
GLYMA_13G309800	2464	26.63	64.4733	696	1912	1.3423	up	1.10896e-14	5.69523e-13	At5g42570	K14009 B-cell receptor-associated protein 31 | (RefSeq) B-cell receptor-associated protein 31 isoform X1 (A)
GLYMA_06G171100	1556	72.5533	16.3967	2017.67	532.667	-2.06475	down	1.14099e-14	5.8509e-13	--	K13448 calcium-binding protein CML | (RefSeq) calcium-binding protein CML38-like (A)
GLYMA_11G202000	3461	11.9967	3.93667	379	139	-1.54543	down	1.14636e-14	5.86965e-13	At1g57610	K20858 calcium uniporter protein, mitochondrial | (RefSeq) calcium uniporter protein 6, mitochondrial (A)
GLYMA_14G158600	3543	31.2667	6.57333	1581	377	-2.18537	down	1.15538e-14	5.90697e-13	At1g21230	K13436 pto-interacting protein 1 [EC:2.7.11.1] | (RefSeq) PTI1-like tyrosine-protein kinase 3-like (A)
GLYMA_07G125800	4842	5.01667	13.7733	165	509.667	1.51933	up	1.16324e-14	5.93706e-13	At4g29310	--
GLYMA_04G036700	633	76.6867	24.21	867.667	314.333	-1.59041	down	1.16474e-14	5.93706e-13	At3g50060	K09422 transcription factor MYB, plant | (RefSeq) MYB178; MYB transcription factor MYB178 (A)
GLYMA_13G290400	15226	13.69	28.4433	1370	3154	1.11395	up	1.19059e-14	6.05978e-13	At3g58640	K04424 sterile alpha motif and leucine zipper containing kinase AZK [EC:2.7.11.25] | (RefSeq) probable serine/threonine-protein kinase SIS8 isoform X1 (A)
GLYMA_02G260500	3030	14.1833	31.69	768	1934.33	1.22245	up	1.19365e-14	6.06628e-13	At5g05350	--
GLYMA_07G039700	2408	24.48	95.7767	818.333	3687	2.03507	up	1.24147e-14	6.29997e-13	At2g05940	K13430 serine/threonine-protein kinase PBS1 [EC:2.7.11.1] | (RefSeq) serine/threonine protein kinase (A)
GLYMA_06G020900	2930	57.93	22.78	3036	1334	-1.28717	down	1.27303e-14	6.45051e-13	At1g20300	--
GLYMA_05G110600	3616	11.8967	3.65	500.667	175	-1.63243	down	1.29922e-14	6.57348e-13	At4g37850	K13422 transcription factor MYC2 | (RefSeq) transcription factor MYC2 (A)
GLYMA_09G022400	2631	71.47	28.38	1799.67	803.667	-1.26941	down	1.44168e-14	7.28345e-13	At2g38380	K00430 peroxidase [EC:1.11.1.7] | (RefSeq) peroxidase 15-like protein precursor (A)
GLYMA_02G132500	1062	155.17	49.6967	2946.33	1068.67	-1.57967	down	1.51683e-14	7.65183e-13	At4g34410	K09286 EREBP-like factor | (RefSeq) EBP; uncharacterized protein LOC100819416 (A)
GLYMA_14G098100	7218	10.37	24.8267	534	1450.67	1.32626	up	1.5224e-14	7.65955e-13	At3g63170	--
GLYMA_06G036800	1530	42.1433	14.81	1152	461.333	-1.44049	down	1.52285e-14	7.65955e-13	At2g23290	K09422 transcription factor MYB, plant | (RefSeq) MYB50; MYB transcription factor MYB50 (A)
GLYMA_06G140700	1310	6.07333	0.97	142.333	24.3333	-2.61982	down	1.57401e-14	7.89464e-13	--	--
GLYMA_03G054100	23361	0	1.96667	0	144.333	9.57251	up	1.57421e-14	7.89464e-13	At5g36930	K13457 disease resistance protein RPM1 | (RefSeq) disease resistance protein RPM1 (A)
GLYMA_17G256500	5323	14.9133	5.21	890.667	351	-1.44923	down	1.59089e-14	7.96658e-13	At1g19850	K14486 auxin response factor | (RefSeq) auxin response factor 5 (A)
GLYMA_17G083400	5706	53.5633	117.467	1631.33	4052.67	1.1987	up	1.68894e-14	8.44518e-13	At5g08170	K10536 agmatine deiminase [EC:3.5.3.12] | (RefSeq) agmatine deiminase (A)
GLYMA_12G074600	3935	1.05	3.71667	74	285.667	1.87432	up	1.84926e-14	9.23332e-13	At3g46290	K13430 serine/threonine-protein kinase PBS1 [EC:2.7.11.1] | (RefSeq) serine/threonine-protein kinase (A)
GLYMA_10G168900	1247	539.893	129.737	9209.67	2570.67	-1.977	down	1.87561e-14	9.35123e-13	At3g05950	--
GLYMA_11G062500	3495	6.65333	1.63	206	56.3333	-1.97515	down	1.95977e-14	9.75656e-13	At3g26300	K13267 flavonoid 6-hydroxylase [EC:1.14.13.-] | (RefSeq) F6H2; cytochrome P450 71D9-like (A)
GLYMA_01G183400	4758	16.1467	4.95667	877	304.667	-1.63624	down	2.14178e-14	1.06472e-12	At5g66900	K13457 disease resistance protein RPM1 | (RefSeq) disease resistance protein RPM1 (A)
GLYMA_13G289200	1705	14.1833	4.83333	432	165.333	-1.49099	down	2.14874e-14	1.06663e-12	At5g54010	K22794 flavonol-3-O-glucoside/galactoside glucosyltransferase [EC:2.4.1.239 2.4.1.-] | (RefSeq) cyanidin 3-O-galactoside 2''-O-xylosyltransferase FGGT1 (A)
GLYMA_07G189500	3804	135.28	326.767	4863.67	13192	1.33316	up	2.26232e-14	1.12138e-12	At1g11260	K24193 MFS transporter, SP family, sugar:H+ symporter | (RefSeq) STP1; monosaccharide transporter (A)
GLYMA_03G215500	1095	6.37667	17.07	125	372.667	1.47899	up	2.31585e-14	1.14624e-12	At4g15970_2	K19038 E3 ubiquitin-protein ligase ATL41 [EC:2.3.2.27] | (RefSeq) RING-H2 finger protein ATL40 (A)
GLYMA_08G146600	897	5.63333	37.6233	91	686.333	2.80534	up	2.46522e-14	1.21841e-12	At1g49210	K19040 E3 ubiquitin-protein ligase ATL10/75/76/77/78 [EC:2.3.2.27] | (RefSeq) RING-H2 finger protein (A)
GLYMA_13G266600	4149	85.9	32.4967	4231.33	1781.33	-1.34519	down	2.62939e-14	1.29767e-12	At1g78700	K14503 brassinosteroid resistant 1/2 | (RefSeq) BES1-1; protein BRI1-EMS-SUPPRESSOR 1 (A)
GLYMA_03G040600	8539	1.45	4.99	181.333	696.333	1.84417	up	2.63657e-14	1.29904e-12	At3g08860	K00827 alanine-glyoxylate transaminase / (R)-3-amino-2-methylpropionate-pyruvate transaminase [EC:2.6.1.44 2.6.1.40] | (RefSeq) alanine--glyoxylate aminotransferase 2 homolog 3, mitochondrial (A)
GLYMA_06G298700	747	21.43	108.373	286.333	1680	2.40739	up	2.63977e-14	1.29904e-12	At4g10270	--
GLYMA_15G082400	1812	9.94333	35.9567	175.667	733.333	1.92768	up	2.73526e-14	1.3441e-12	At2g34140	--
GLYMA_03G160400	760	16.56	4.02667	225.333	61	-1.98169	down	2.78847e-14	1.36827e-12	--	--
GLYMA_04G014000	2618	3.69667	10.1533	140.667	430.667	1.51555	up	2.96212e-14	1.4514e-12	At3g18830	K08150 MFS transporter, SP family, solute carrier family 2 (myo-inositol transporter), member 13 | (RefSeq) inositol transporter 1 isoform X1 (A)
GLYMA_01G181800	2254	18.3767	38.77	648	1535.67	1.13962	up	3.05104e-14	1.49282e-12	At4g31940	K23136 fraxetin 5-hydroxylase [EC:1.14.14.164] | (RefSeq) xanthotoxin 5-hydroxylase CYP82C4 (A)
GLYMA_11G226000	3314	8.37333	24.7333	340	1111.33	1.61668	up	3.19354e-14	1.56031e-12	At2g39890	K24917 amino acid permease | (RefSeq) amino acid permease 3 isoform X1 (A)
GLYMA_15G017000	3468	96.6867	210.067	4274.67	10493.3	1.18306	up	3.26517e-14	1.59303e-12	At1g52190	K14638 solute carrier family 15 (peptide/histidine transporter), member 3/4 | (RefSeq) protein NRT1/ PTR FAMILY 1.2 (A)
GLYMA_11G175900	2837	2.23667	10.14	79	394.333	2.22855	up	3.39822e-14	1.65558e-12	At5g58860	K15401 long-chain fatty acid omega-monooxygenase [EC:1.14.14.80] | (RefSeq) cytochrome P450 86A1 (A)
GLYMA_01G204800	2704	23.48	105.663	498.333	2637.67	2.25086	up	3.47796e-14	1.69201e-12	At4g17030	K20628 expansin | (RefSeq) EXPB8; expansin-B3-like precursor (A)
GLYMA_13G095000	1448	41.87	90.8	907	2203	1.17655	up	3.52803e-14	1.71393e-12	At4g25810	K14504 xyloglucan:xyloglucosyl transferase TCH4 [EC:2.4.1.207] | (RefSeq) probable xyloglucan endotransglucosylase/hydrolase protein 23-like precursor (A)
GLYMA_17G132000	3627	3.96	0.653333	121	22	-2.55533	down	3.58446e-14	1.73887e-12	At4g11780	--
GLYMA_02G212100	1419	14.5967	4.52333	345.667	120	-1.62933	down	3.69391e-14	1.78942e-12	At3g60520	--
GLYMA_03G229800	3231	0.113333	3.45333	2.66667	93.6667	5.00161	up	3.70216e-14	1.79088e-12	At1g56600	K18819 inositol 3-alpha-galactosyltransferase [EC:2.4.1.123] | (RefSeq) galactinol synthase 2 (A)
GLYMA_20G083500	3989	23.4067	48	1184.67	2735.67	1.09901	up	3.76865e-14	1.82047e-12	At4g30240	--
GLYMA_02G155600	2395	37.4633	124.67	963.333	3716.67	1.80942	up	3.82133e-14	1.84331e-12	At2g47710	--
GLYMA_06G091900	1964	0.856667	4.31333	22	124.667	2.39453	up	3.84411e-14	1.85168e-12	At5g65660	--
GLYMA_13G119100	7021	28.1467	10.71	1228.67	516.333	-1.33789	down	3.90905e-14	1.88031e-12	At5g48960	--
GLYMA_05G067200	4246	0.323333	1.94667	24.6667	162	2.63833	up	4.03894e-14	1.93889e-12	At2g35170	--
GLYMA_05G186800	168	19.73	85.8933	59.3333	298.333	2.19912	up	4.0432e-14	1.93889e-12	--	--
GLYMA_07G034400	2019	7.31667	17.09	264.333	697	1.28939	up	4.04786e-14	1.93889e-12	At1g80440	--
GLYMA_11G117100	3226	6.00333	25.1733	193	878.333	2.11924	up	4.08513e-14	1.954e-12	At1g68920	K23050 phenylcoumaran benzylic ether reductase [EC:1.3.1.-] | (RefSeq) eugenol synthase 1 (A)
GLYMA_18G207400	2672	13.9033	38.1633	179	560	1.52741	up	4.16554e-14	1.98967e-12	At3g51660	K07253 phenylpyruvate tautomerase [EC:5.3.2.1] | (RefSeq) uncharacterized protein LOC100306650 (A)
GLYMA_13G065900	4362	68.41	24.2233	2470.33	984.667	-1.43445	down	4.37043e-14	2.08462e-12	At5g39990	K20891 beta-glucuronosyltransferase [EC:2.4.1.-] | (RefSeq) beta-glucuronosyltransferase GlcAT14A isoform X1 (A)
GLYMA_13G043900	2120	104.023	346.93	3942.67	15208	1.80825	up	4.38258e-14	2.0875e-12	At5g64260	--
GLYMA_13G241200	3854	1.19333	6.17	46	278	2.45196	up	4.49019e-14	2.13578e-12	At3g09010	K13416 brassinosteroid insensitive 1-associated receptor kinase 1 [EC:2.7.10.1 2.7.11.1] | (RefSeq) BRASSINOSTEROID INSENSITIVE 1-associated receptor kinase 1 isoform X1 (A)
GLYMA_02G182300	847	1.56	8.61667	23.6667	149.333	2.5361	up	4.55536e-14	2.16377e-12	--	--
GLYMA_13G357800	5374	58.16	125.097	2099	5038.33	1.16478	up	4.58938e-14	2.1769e-12	At2g25740_1	--
GLYMA_07G168900	6972	4.6	1.55667	529.333	195.667	-1.51536	down	5.0502e-14	2.39215e-12	At4g01870	--
GLYMA_09G269000	3328	8.02	22.7167	180.333	575.333	1.5669	up	5.44482e-14	2.57551e-12	At1g62880	K20368 protein cornichon | (RefSeq) protein cornichon homolog 4 (A)
GLYMA_13G030300	6574	1.86333	6.97333	97.3333	418.333	1.97302	up	5.54277e-14	2.61821e-12	At3g45140	K00454 lipoxygenase [EC:1.13.11.12] | (RefSeq) linoleate 13S-lipoxygenase 2-1, chloroplastic (A)
GLYMA_17G027400	891	35.1833	115.3	444.333	1687.67	1.78774	up	5.58855e-14	2.63619e-12	At4g02380	--
GLYMA_13G351600	2444	1.86667	12.7267	38.3333	283.667	2.81252	up	5.64434e-14	2.65883e-12	At1g17710	K13248 pyridoxal phosphate phosphatase PHOSPHO2 [EC:3.1.3.74] | (RefSeq) inorganic pyrophosphatase 2-like (A)
GLYMA_02G028700	11773	0.0466667	0.37	9.33333	86.3333	3.11662	up	5.78596e-14	2.72179e-12	At1g59970	K07999 matrix metalloproteinase-20 (enamelysin) [EC:3.4.24.-] | (RefSeq) metalloendoproteinase 4-MMP (A)
GLYMA_06G068100	3397	8.84667	3.03333	538	201.667	-1.49495	down	5.99945e-14	2.81834e-12	At4g32300	K13416 brassinosteroid insensitive 1-associated receptor kinase 1 [EC:2.7.10.1 2.7.11.1] | (RefSeq) BRASSINOSTEROID INSENSITIVE 1-associated receptor kinase 1 (A)
GLYMA_18G289900	1334	14.7967	3.86333	212.333	60.6667	-1.89111	down	6.06532e-14	2.84537e-12	At2g38480	--
GLYMA_02G072800	1622	2.35	10.65	68.3333	359.333	2.26116	up	6.31109e-14	2.9566e-12	At5g19790	K09286 EREBP-like factor | (RefSeq) ethylene-responsive transcription factor ERN1 (A)
GLYMA_01G038600	2708	3.77667	10.8867	140.667	444.333	1.57997	up	6.3697e-14	2.97997e-12	At1g70000	--
GLYMA_04G198400	2837	5.65333	26.8467	133.667	709.333	2.29723	up	6.48426e-14	3.02942e-12	At5g50800	K15382 solute carrier family 50 (sugar transporter) | (RefSeq) SWEET4; sugar efflux transporter SWEET4 (A)
GLYMA_13G274100	2854	18.9367	47.9533	966	2779.33	1.40539	up	6.78951e-14	3.1677e-12	At3g15210	K09286 EREBP-like factor | (RefSeq) ethylene-responsive transcription factor 4 (A)
GLYMA_08G346300	3359	10.5067	38.7	493	1961.67	1.93061	up	6.81678e-14	3.17608e-12	At3g07340	K23050 phenylcoumaran benzylic ether reductase [EC:1.3.1.-] | (RefSeq) eugenol synthase 1 (A)
GLYMA_08G195100	2372	17.06	54.04	387.333	1384	1.72377	up	6.84837e-14	3.18645e-12	At1g17710	K13248 pyridoxal phosphate phosphatase PHOSPHO2 [EC:3.1.3.74] | (RefSeq) ACP1; acid phosphatase ACP1 (A)
GLYMA_02G267800	10412	5.02	10.52	344	804.667	1.12721	up	6.9473e-14	3.22808e-12	At2g32950_2	K10143 E3 ubiquitin-protein ligase RFWD2 [EC:2.3.2.27] | (RefSeq) E3 ubiquitin-protein ligase COP1 (A)
GLYMA_13G111500	5506	229.747	527.737	12417	32498.3	1.26743	up	7.02764e-14	3.26098e-12	At1g19110	K07964 heparanase [EC:3.2.1.166] | (RefSeq) heparanase-like protein 2 (A)
GLYMA_10G185200	5073	73.49	22.34	3115	1072.33	-1.65453	down	7.1372e-14	3.30732e-12	At1g04280	--
novel.284	2016	61.35	20.93	2211	846.333	-1.49141	down	7.18957e-14	3.32708e-12	At5g12010	--
GLYMA_15G093900	2446	24.3367	64.54	654.667	1952.33	1.46676	up	7.49764e-14	3.46494e-12	At1g30040	K04125 gibberellin 2beta-dioxygenase [EC:1.14.11.13] | (RefSeq) GA2OX8; gibberellin 2-beta-dioxygenase 8 (A)
GLYMA_04G021000	6704	0.616667	3.76667	21.3333	147.667	2.67752	up	7.65253e-14	3.53174e-12	At1g60420	K17609 nucleoredoxin [EC:1.8.1.8] | (RefSeq) thioredoxin-like superfamily protein (A)
GLYMA_05G212300	1605	5.33667	18.35	107	415.667	1.85051	up	7.75598e-14	3.57466e-12	At5g41590	--
GLYMA_04G103600	2933	0.24	2.18667	8	81.3333	3.24587	up	7.87906e-14	3.62649e-12	At5g65140	K01087 trehalose 6-phosphate phosphatase [EC:3.1.3.12] | (RefSeq) probable trehalose-phosphate phosphatase J (A)
GLYMA_01G177900	1479	17.16	4.49667	453.333	137	-1.85768	down	7.97343e-14	3.66499e-12	At5g66690	K12356 coniferyl-alcohol glucosyltransferase [EC:2.4.1.111] | (RefSeq) UDP-glycosyltransferase 72E1 (A)
GLYMA_11G029000	3163	5.53333	14.2633	262	755.333	1.43201	up	8.05343e-14	3.69678e-12	At1g12420	--
GLYMA_04G079200	1285	1.58333	7.85	31.3333	174.667	2.37346	up	8.23125e-14	3.77334e-12	At4g32690	--
GLYMA_12G044700	2814	4.47	12.74	161.667	517.333	1.57156	up	8.29823e-14	3.79894e-12	At3g18830	K08150 MFS transporter, SP family, solute carrier family 2 (myo-inositol transporter), member 13 | (RefSeq) inositol transporter 1 (A)
GLYMA_09G017000	4727	13.6333	28.4467	699	1644.33	1.12566	up	8.51206e-14	3.89162e-12	At5g47780	K13648 alpha-1,4-galacturonosyltransferase [EC:2.4.1.43] | (RefSeq) probable galacturonosyltransferase 4 (A)
GLYMA_04G034200	7839	4.48	10.4067	303.667	780.667	1.27272	up	9.15594e-14	4.1804e-12	At5g42620	K01404 leishmanolysin [EC:3.4.24.36] | (RefSeq) leishmanolysin-like peptidase (A)
GLYMA_06G294400	4288	6.08333	22.5933	254.667	1086.33	1.95851	up	9.66495e-14	4.40691e-12	At4g14400	K15503 serine/threonine-protein phosphatase 6 regulatory ankyrin repeat subunit B | (RefSeq) protein ACCELERATED CELL DEATH 6 (A)
GLYMA_02G054800	8834	22.3933	9.52333	1264	606	-1.16933	down	9.77378e-14	4.45059e-12	At2g36230	K01814 phosphoribosylformimino-5-aminoimidazole carboxamide ribotide isomerase [EC:5.3.1.16] | (RefSeq) uncharacterized protein LOC100800577 (A)
GLYMA_02G244500	3168	4.06333	12.61	79	272.667	1.69031	up	1.01204e-13	4.60229e-12	At5g37680	K07955 ADP-ribosylation factor-like protein 8 | (RefSeq) uncharacterized protein LOC100305570 (A)
GLYMA_17G106600	1776	15.5833	32.72	495.333	1163	1.13078	up	1.02167e-13	4.63991e-12	At5g11090	--
GLYMA_03G069400	12346	1.68667	5.79667	81.3333	309	1.83454	up	1.02697e-13	4.65382e-12	At3g55610_2	K12657 delta-1-pyrroline-5-carboxylate synthetase [EC:2.7.2.11 1.2.1.41] | (RefSeq) ALDH18B3; delta-1-pyrroline-5-carboxylate synthase (A)
GLYMA_13G261300	733	7.91	30.2867	104	435	1.99029	up	1.02746e-13	4.65382e-12	--	--
GLYMA_15G129100	19894	114.477	42.7233	3909.67	1638.33	-1.36169	down	1.03844e-13	4.69734e-12	At2g38380	K00430 peroxidase [EC:1.11.1.7] | (RefSeq) peroxidase C3-like precursor (A)
GLYMA_09G071800	1377	19.42	49.9667	399.333	1144.67	1.42283	up	1.04819e-13	4.73517e-12	At5g20700	--
GLYMA_02G080900	8210	27.2	63.7033	2001.67	5165	1.28071	up	1.05389e-13	4.75463e-12	At4g39350	K10999 cellulose synthase A [EC:2.4.1.12] | (RefSeq) cellulose synthase A catalytic subunit 2 [UDP-forming] (A)
GLYMA_07G195300	2539	81.5133	236.35	1933	6396.67	1.60729	up	1.0658e-13	4.80202e-12	At4g27450	--
GLYMA_13G088300	2996	117.4	45.0233	3698.33	1613.33	-1.31678	down	1.11289e-13	5.00495e-12	At1g35910	K01087 trehalose 6-phosphate phosphatase [EC:3.1.3.12] | (RefSeq) probable trehalose-phosphate phosphatase H (A)
GLYMA_06G306000	5343	6.09667	14.6133	230.667	618	1.32079	up	1.11377e-13	5.00495e-12	At1g05170	K20855 beta-1,3-galactosyltransferase 1/2/3/4/5/7/8 [EC:2.4.1.-] | (RefSeq) probable beta-1,3-galactosyltransferase 2 (A)
GLYMA_09G111700	7733	8.1	19.3	243.333	652	1.31706	up	1.12456e-13	5.04679e-12	At3g58010	--
GLYMA_05G160500	1748	14.86	4.19	463.667	149.667	-1.75494	down	1.12951e-13	5.06236e-12	At2g42760	--
GLYMA_12G205700	1600	4.36667	18.3267	124.667	580.667	2.11807	up	1.25251e-13	5.60624e-12	At1g03790	K23047 E3 ubiquitin-protein ligase UNKL [EC:2.3.2.27] | (RefSeq) zinc finger CCCH domain-containing protein 2 (A)
GLYMA_17G155900	2403	26.2667	9.86667	849.333	358	-1.35131	down	1.28802e-13	5.75765e-12	At4g37850	K13422 transcription factor MYC2 | (RefSeq) transcription factor MYC2 (A)
GLYMA_01G161100	4985	239.877	81.32	11103.3	4294	-1.49387	down	1.42494e-13	6.36139e-12	At1g47670	K24917 amino acid permease | (RefSeq) amino acid permease 8 (A)
GLYMA_05G170900	2078	1.73	12.33	34.3333	277.333	2.89475	up	1.47089e-13	6.55794e-12	At4g20390	--
GLYMA_04G197400	2627	0.586667	4.01	15	116.667	2.8433	up	1.47415e-13	6.56392e-12	At1g08510	K10781 fatty acyl-ACP thioesterase B [EC:3.1.2.14 3.1.2.21] | (RefSeq) palmitoyl-acyl carrier protein thioesterase, chloroplastic isoform X1 (A)
GLYMA_15G198900	573	11.9067	41.6867	122.333	486	1.87393	up	1.47984e-13	6.58066e-12	At5g25280	--
GLYMA_09G067900	1015	1.18	6.41	21.3333	133	2.51526	up	1.49027e-13	6.61841e-12	At2g37580_1	K19038 E3 ubiquitin-protein ligase ATL41 [EC:2.3.2.27] | (RefSeq) RING-H2 finger protein ATL40 (A)
GLYMA_01G200500	5008	24.1233	47.06	1167	2539	1.02471	up	1.5115e-13	6.70398e-12	At4g18010	K24221 type I inositol polyphosphate 5-phosphatase IP5P1/2 [EC:3.1.3.56] | (RefSeq) type I inositol polyphosphate 5-phosphatase 2 (A)
GLYMA_07G266400	2944	11.0233	27.1833	433	1214.33	1.37087	up	1.52234e-13	6.74333e-12	At2g23140	K08332 vacuolar protein 8 | (RefSeq) U-box domain-containing protein 15-like (A)
GLYMA_14G176700	3847	13.4733	46.3467	416.667	1639.33	1.84836	up	1.58105e-13	6.99429e-12	At4g33950	K14498 serine/threonine-protein kinase SRK2 [EC:2.7.11.1] | (RefSeq) serine/threonine-protein kinase SAPK2 (A)
GLYMA_13G335900	5142	6.41667	1.84333	459	152	-1.72231	down	1.59097e-13	7.02908e-12	At5g02390	--
GLYMA_04G048600	3485	3.01333	9.51333	82.3333	288	1.71362	up	1.70375e-13	7.51764e-12	At3g49720	K23871 putative pectin methylesterase [EC:2.1.1.-] | (RefSeq) probable pectin methylesterase CGR3 (A)
GLYMA_15G115600	2958	242.65	103.5	11466.7	5454	-1.17145	down	1.77155e-13	7.80673e-12	At5g47530	--
GLYMA_07G188900	3208	8.41667	20.1867	230.333	624	1.32758	up	1.8133e-13	7.98038e-12	At1g11380	--
GLYMA_19G043000	4138	80.1933	197.293	3422.67	9545.33	1.36549	up	1.83262e-13	8.05504e-12	At5g38710	K00318 proline dehydrogenase [EC:1.5.5.2] | (RefSeq) PDH; proline dehydrogenase (A)
novel.1344	1046	0.136667	3.88667	2.33333	75.6667	4.89213	up	1.85595e-13	8.1471e-12	--	--
GLYMA_13G248500	3802	13.4167	4.64667	670.333	264.333	-1.46142	down	1.86133e-13	8.1602e-12	At1g11300	K13430 serine/threonine-protein kinase PBS1 [EC:2.7.11.1] | (RefSeq) serine/threonine protein kinase (A)
GLYMA_20G242000	2909	1.36333	6.61667	70.6667	375.333	2.32448	up	1.8864e-13	8.25954e-12	At2g39350	K05681 ATP-binding cassette, subfamily G (WHITE), member 2 | (RefSeq) ABC transporter G family member 25 (A)
GLYMA_02G135200	2980	38.8367	11.6033	955	319	-1.67755	down	1.92216e-13	8.40532e-12	At1g49570	K00430 peroxidase [EC:1.11.1.7] | (RefSeq) uncharacterized protein LOC100805712 precursor (A)
GLYMA_11G194100	2097	1.05667	4.73667	28	142	2.23342	up	1.96435e-13	8.57884e-12	At5g57620	K09422 transcription factor MYB, plant | (RefSeq) transcription factor RAX2 (A)
GLYMA_10G047200	1455	2.94667	8.41667	76.6667	244	1.57517	up	2.01169e-13	8.77438e-12	At5g02750	K11982 E3 ubiquitin-protein ligase RNF115/126 [EC:2.3.2.27] | (RefSeq) E3 ubiquitin-protein ligase RDUF1 (A)
GLYMA_05G206200	4170	4.77333	1.35333	346	113	-1.73767	down	2.13612e-13	9.30521e-12	At3g14260	--
GLYMA_12G076800	6844	2.01	7.08667	131.667	510.333	1.86972	up	2.37784e-13	1.03318e-11	At2g28260	K05391 cyclic nucleotide gated channel, plant | (RefSeq) protein CNGC15b (A)
GLYMA_16G136200	4220	4.73	1.2	282	82.6667	-1.8974	down	2.40438e-13	1.04339e-11	At5g36930	K13457 disease resistance protein RPM1 | (RefSeq) disease resistance protein RPM1 isoform X1 (A)
GLYMA_10G239400	2613	6.12	1.44667	285.333	75.3333	-2.02162	down	2.41882e-13	1.04832e-11	At5g51990	K09286 EREBP-like factor | (RefSeq) ethylene-responsive transcription factor ERF023 (A)
GLYMA_20G092400	2069	18.8933	37.0067	672.667	1470	1.03094	up	2.45172e-13	1.06123e-11	At5g26595	K22207 L-cysteine desulfhydrase [EC:4.4.1.28] | (RefSeq) probable L-cysteine desulfhydrase, chloroplastic (A)
GLYMA_16G196900	5616	10.7467	3.54667	342	128.333	-1.52741	down	2.54724e-13	1.10118e-11	At5g62070	--
GLYMA_07G090000	4480	16.8	5.89667	640.667	257	-1.43856	down	2.58837e-13	1.11755e-11	At1g49050	K22683 aspartyl protease family protein [EC:3.4.23.-] | (RefSeq) aspartyl protease family protein 2 (A)
GLYMA_04G104400	4274	0.393333	2.35667	16.3333	108.667	2.63588	up	2.62805e-13	1.13325e-11	At1g22180	K19996 phosphatidylinositol transfer protein SFH5 | (RefSeq) patellin-3 (A)
GLYMA_09G032100	2429	15.1267	46.3667	411.333	1441.67	1.68606	up	2.78815e-13	1.20077e-11	At5g49620	K09422 transcription factor MYB, plant | (RefSeq) transcription factor MYB108 (A)
GLYMA_17G187700	2550	4.16667	15.7733	190.667	831.667	1.99467	up	2.85726e-13	1.22898e-11	--	K14794 ribosomal RNA-processing protein 12 | (RefSeq) RRP12-like protein (A)
GLYMA_17G216500	1995	2.67667	9.32	95.3333	378.667	1.86499	up	2.86358e-13	1.23015e-11	At5g11000	--
GLYMA_02G055000	1189	69.7433	16.0733	1482	398	-2.04092	down	2.98064e-13	1.27883e-11	At4g36500	--
GLYMA_04G238700	1723	7.83	18.5567	241.333	644.333	1.31151	up	3.03554e-13	1.30075e-11	At4g27950	K13434 pathogenesis-related genes transcriptional activator PTI6 | (RefSeq) pathogenesis-related genes transcriptional activator PTI6 (A)
GLYMA_15G098500	2770	4.16	16.52	67	296.333	2.04615	up	3.08075e-13	1.31847e-11	At1g54580	--
GLYMA_04G101900	1655	1.81667	8.40333	43.6667	226	2.26388	up	3.13113e-13	1.33835e-11	At1g34670	K09422 transcription factor MYB, plant | (RefSeq) transcription factor MYB93 (A)
GLYMA_01G012800	4708	5.75667	0.91	211.333	38.3333	-2.58732	down	3.21375e-13	1.37195e-11	At4g16070	K13806 sn1-specific diacylglycerol lipase [EC:3.1.1.116] | (RefSeq) uncharacterized protein LOC100810158 (A)
GLYMA_15G177400	6828	10.33	3.59667	817	313	-1.46765	down	3.26653e-13	1.39274e-11	At2g06030	K15082 DNA repair protein RAD7 | (RefSeq) uncharacterized protein LOC100808150 (A)
GLYMA_16G025900	3678	8.84333	22.48	443.667	1286.67	1.41679	up	3.33603e-13	1.4206e-11	At1g01360	K14496 abscisic acid receptor PYR/PYL family | (RefSeq) abscisic acid receptor PYL9-like (A)
GLYMA_07G022300	4864	12.4033	29.63	519	1369.33	1.31069	up	3.35773e-13	1.42806e-11	At2g03220	K13681 xyloglucan fucosyltransferase [EC:2.4.1.-] | (RefSeq) probable fucosyltransferase 7 isoform X1 (A)
GLYMA_08G118000	2212	19.74	4.51	780	207	-2.05361	down	3.37541e-13	1.43379e-11	At2g42760	--
GLYMA_02G078500	6337	36.96	94.2667	1529	4467	1.41944	up	3.46806e-13	1.47132e-11	At1g74320	K14156 choline/ethanolamine kinase [EC:2.7.1.32 2.7.1.82] | (RefSeq) GmCK1p (A)
GLYMA_08G147700	1517	2.54333	10.85	55	268	2.16013	up	3.61343e-13	1.53109e-11	At2g38820	--
GLYMA_12G192600	2132	31.8467	82.59	682.667	2016	1.4408	up	3.64722e-13	1.54349e-11	At5g42570	K14009 B-cell receptor-associated protein 31 | (RefSeq) B-cell receptor-associated protein 31 (A)
GLYMA_11G224800	3695	12	3.91	387.333	142.667	-1.54901	down	3.73919e-13	1.58046e-11	--	--
GLYMA_02G009500	747	17.4733	53.64	233.333	820.667	1.68669	up	3.80243e-13	1.6052e-11	--	--
GLYMA_13G316900	7562	21.4667	8.33667	925	408.333	-1.29497	down	3.80769e-13	1.60543e-11	At1g08320_1	K14431 transcription factor TGA | (RefSeq) BZIP90; transcription factor TGA9 isoform X4 (A)
GLYMA_18G187300	1302	10.3867	33.1333	242	878.333	1.73749	up	3.84772e-13	1.62022e-11	--	--
GLYMA_07G073100	4412	271.243	916.887	5192.33	20476.7	1.83642	up	3.85224e-13	1.62022e-11	At2g45820	--
GLYMA_11G107100	1492	6.81	22.6967	166	634.333	1.80486	up	3.87881e-13	1.62939e-11	At4g34990	K09422 transcription factor MYB, plant | (RefSeq) MYBZ2; transcription factor MYBZ2 (A)
GLYMA_14G003200	3867	27.78	55.6033	845.667	1911.33	1.06704	up	3.91133e-13	1.64103e-11	At1g03475	K00228 coproporphyrinogen III oxidase [EC:1.3.3.3] | (RefSeq) CPX; oxygen-dependent coproporphyrinogen-III oxidase, chloroplastic (A)
GLYMA_14G087200	1877	16.89	52.4333	248.667	890	1.70842	up	3.95588e-13	1.65656e-11	At2g14900	--
GLYMA_14G192500	2732	2.34333	16.2233	79.6667	615.333	2.8406	up	3.96145e-13	1.65656e-11	At5g58860	K15401 long-chain fatty acid omega-monooxygenase [EC:1.14.14.80] | (RefSeq) cytochrome P450 86A1 (A)
GLYMA_15G015100	3724	22.4867	8.29667	1294	523.667	-1.38781	down	3.96291e-13	1.65656e-11	At5g24090	K01183 chitinase [EC:3.2.1.14] | (RefSeq) hevamine-A (A)
GLYMA_13G221700	3427	8.80667	3.18	539.667	221	-1.40284	down	3.99071e-13	1.66615e-11	--	--
GLYMA_20G180000	3228	7.66667	17.4667	336.333	854.667	1.247	up	4.08829e-13	1.7048e-11	At4g30080	K14486 auxin response factor | (RefSeq) auxin response factor 19 (A)
GLYMA_15G202100	1432	3.07667	11.3533	79	332.667	1.95403	up	4.13777e-13	1.72333e-11	At5g25240	--
GLYMA_12G204300	3970	40.06	11.49	1429	453.667	-1.74952	down	4.28047e-13	1.78059e-11	At4g28300	--
GLYMA_15G104800	1496	8.36333	2.53667	223.667	77	-1.64947	down	4.47074e-13	1.85748e-11	At1g03220	K22683 aspartyl protease family protein [EC:3.4.23.-] | (RefSeq) LOW QUALITY PROTEIN: aspartyl protease family protein 2 (A)
GLYMA_01G102300	1509	3.68667	14.29	99.6667	448.667	2.03409	up	4.71288e-13	1.9557e-11	--	--
GLYMA_16G136600	10907	3.8	0.626667	536.667	103.333	-2.51144	down	5.09051e-13	2.10984e-11	At5g17680	K13457 disease resistance protein RPM1 | (RefSeq) disease resistance protein RPM1 isoform X1 (A)
GLYMA_08G148800	2607	17.1633	39.52	511.333	1326	1.26654	up	5.19352e-13	2.14993e-11	At5g06710	K09338 homeobox-leucine zipper protein | (RefSeq) homeobox-leucine zipper protein HOX11 (A)
GLYMA_09G208200	5116	8.65333	3.79333	706.667	347	-1.12664	down	5.22683e-13	2.1611e-11	At3g03050	K20924 cellulose synthase-like protein [EC:2.4.1.-] | (RefSeq) cellulose synthase-like protein D3 (A)
GLYMA_07G174100	3721	15.1767	6.84333	791.333	399.333	-1.08577	down	5.26057e-13	2.17242e-11	At1g14740	--
GLYMA_08G024700	3622	0.553333	4.43	19	171.667	3.06204	up	5.4406e-13	2.24405e-11	At5g46290	K09458 3-oxoacyl-[acyl-carrier-protein] synthase II [EC:2.3.1.179] | (RefSeq) 3-oxoacyl-[acyl-carrier-protein] synthase I, chloroplastic isoform X4 (A)
GLYMA_01G190300	1265	25.9867	60.7033	447	1177	1.29218	up	5.6494e-13	2.32736e-11	At4g37300	--
GLYMA_13G166800	2678	5.84	15.36	133	390	1.45636	up	5.80755e-13	2.38963e-11	At2g26660	--
GLYMA_05G137500	3016	4.10333	0.623333	101.667	18	-2.62104	down	6.00622e-13	2.4684e-11	At1g17020	K24028 salicylic acid 3-hydroxylase [EC:1.14.11.-] | (RefSeq) protein DMR6-LIKE OXYGENASE 2 isoform X1 (A)
GLYMA_13G370100	2168	208.847	57.78	5897	1846.33	-1.79014	down	6.05554e-13	2.48568e-11	At1g80840	K18834 WRKY transcription factor 1 | (RefSeq) WRKY transcription factor 1 (A)
GLYMA_04G013400	917	19.7167	81.8067	251.667	1220.67	2.12597	up	6.33514e-13	2.59733e-11	At1g49310	--
GLYMA_13G170300	1318	1.08	6.18	25.3333	163.667	2.58735	up	6.44891e-13	2.6408e-11	At1g23980	K19038 E3 ubiquitin-protein ligase ATL41 [EC:2.3.2.27] | (RefSeq) RING-H2 finger protein ATL40 (A)
GLYMA_01G016600	2503	15.4467	3.57667	371.667	95.6667	-2.05034	down	6.77841e-13	2.77241e-11	At3g02940	K09422 transcription factor MYB, plant | (RefSeq) transcription factor MYB39 (A)
GLYMA_10G147700	1285	63.5433	160.663	1019.67	2959.67	1.41105	up	6.8723e-13	2.80745e-11	At3g62550	--
GLYMA_13G132700	7157	1.37333	4.86333	86.6667	345.667	1.89011	up	6.93283e-13	2.82879e-11	At2g37440	K01099 inositol polyphosphate 5-phosphatase INPP5B/F [EC:3.1.3.36] | (RefSeq) type IV inositol polyphosphate 5-phosphatase 9 isoform X2 (A)
GLYMA_07G090800	1275	32.4833	107.61	741.333	2845.67	1.8013	up	7.35092e-13	2.99581e-11	At1g13350	--
GLYMA_03G079200	2305	5.23	16	215.667	759	1.68365	up	7.52889e-13	3.06328e-11	At3g25030	--
GLYMA_09G018800	7475	12.6533	4.02667	804	290.333	-1.58331	down	7.53442e-13	3.06328e-11	At5g49760	K13430 serine/threonine-protein kinase PBS1 [EC:2.7.11.1] | (RefSeq) serine/threonine-protein kinase (A)
GLYMA_17G048100	5562	33.4933	66.6433	1516.33	3414.67	1.05867	up	7.5555e-13	3.0682e-11	At1g19110	K01074 palmitoyl-protein thioesterase [EC:3.1.2.22] | (RefSeq) uncharacterized protein LOC102659903 (A)
GLYMA_16G011500	3731	13.8833	38.1367	388.333	1209	1.52399	up	7.87547e-13	3.19434e-11	At3g14200	K09523 DnaJ homolog subfamily C member 3 | (RefSeq) dnaJ protein P58IPK homolog (A)
GLYMA_13G077000	805	67.9233	13.2267	979.667	212.667	-2.29864	down	8.02115e-13	3.24956e-11	--	--
GLYMA_13G188900	4919	26.4533	7.09333	1159	360.333	-1.82262	down	8.06719e-13	3.26434e-11	At4g05200	K13418 somatic embryogenesis receptor kinase 1 [EC:2.7.10.1 2.7.11.1] | (RefSeq) somatic embryogenesis receptor kinase 2 (A)
GLYMA_09G182200	7085	8.45667	1.06667	269	39.3333	-2.90651	down	8.67359e-13	3.50142e-11	At1g66920	K13416 brassinosteroid insensitive 1-associated receptor kinase 1 [EC:2.7.10.1 2.7.11.1] | (RefSeq) BRASSINOSTEROID INSENSITIVE 1-associated receptor kinase 1 isoform X1 (A)
GLYMA_14G098700	854	4.49	18.3267	68.6667	324.667	2.10638	up	8.94353e-13	3.60613e-11	--	--
GLYMA_10G234100	5634	4.08333	9.29	310	778.333	1.24136	up	9.35974e-13	3.7695e-11	At4g24020	--
GLYMA_12G214100	1199	83.1567	34.11	1782	830.667	-1.21842	down	9.37343e-13	3.77057e-11	At3g20600	--
GLYMA_04G103900	1940	89.4367	174.173	3105.33	6766.67	1.02556	up	9.4486e-13	3.79634e-11	At1g78080	K09286 EREBP-like factor | (RefSeq) DREB3; dehydration responsive element-binding protein 3 (A)
GLYMA_04G168500	5322	0.4	2.37	24.6667	166.333	2.62942	up	9.47943e-13	3.80425e-11	At1g74460	K00660 chalcone synthase [EC:2.3.1.74] | (RefSeq) CHS14; chalcone synthase (A)
GLYMA_03G204900	788	13.0733	2.33333	184	36	-2.44199	down	9.89743e-13	3.96734e-11	--	K20725 MAP kinase substrate 1 | (RefSeq) protein MKS1 (A)
GLYMA_08G069100	977	1.99	9.37667	34.6667	183	2.2937	up	1.01984e-12	4.08318e-11	--	--
GLYMA_19G181900	4099	9.27333	21.5367	558	1434.67	1.27263	up	1.02694e-12	4.10681e-11	At4g30080	K14486 auxin response factor | (RefSeq) auxin response factor 19 (A)
GLYMA_04G129200	8112	0.756667	0.103333	86.3333	13.3333	-2.80759	down	1.07891e-12	4.30958e-11	Hs14424433	K14802 phospholipid-transporting ATPase [EC:7.6.2.1] | (RefSeq) phospholipid-transporting ATPase 1 (A)
GLYMA_10G225300	5443	6.17	15.0367	601.333	1661.67	1.3531	up	1.09766e-12	4.37937e-11	At1g21200	--
GLYMA_20G248000	9445	10.62	20.9267	613	1340	1.03692	up	1.11787e-12	4.45478e-11	At1g05790	K13806 sn1-specific diacylglycerol lipase [EC:3.1.1.116] | (RefSeq) uncharacterized protein LOC100810158 (A)
GLYMA_04G251700	2400	2.61667	8.58	85.3333	304.667	1.763	up	1.13154e-12	4.504e-11	At1g77660	--
GLYMA_01G109800	5884	23.3833	10.1133	1206.67	578.667	-1.15184	down	1.15678e-12	4.5991e-11	At2g37980	K23280 rhamnogalacturonan I rhamnosyltransferase [EC:2.4.1.351] | (RefSeq) rhamnogalacturonan I rhamnosyltransferase 1 (A)
GLYMA_06G059700	4483	1.36333	5.19667	44.3333	193.667	2.00212	up	1.16765e-12	4.63692e-11	At5g24940	K17506 protein phosphatase 1L [EC:3.1.3.16] | (RefSeq) uncharacterized protein LOC100807396 (A)
GLYMA_01G200400	2085	0.836667	4.73667	23.3333	152	2.57363	up	1.23648e-12	4.90454e-11	At2g35380	K00430 peroxidase [EC:1.11.1.7] | (RefSeq) peroxidase 20 precursor (A)
GLYMA_20G189300	9392	12.8633	29.26	891	2239	1.24418	up	1.24299e-12	4.92466e-11	At3g52990	K00873 pyruvate kinase [EC:2.7.1.40] | (RefSeq) pyruvate kinase 1, cytosolic isoform X1 (A)
GLYMA_08G069200	981	4.04	27.2867	70.3333	533	2.80331	up	1.24668e-12	4.93357e-11	--	--
GLYMA_02G141400	1781	18.75	42.5633	388.333	1002.67	1.25174	up	1.2618e-12	4.9876e-11	At3g13720	K20359 PRA1 family protein 1 | (RefSeq) PRA1 family protein F3 isoform X5 (A)
GLYMA_12G104100	3171	6.48667	2.55333	368	162.667	-1.28119	down	1.29072e-12	5.09604e-11	At2g19130	K13416 brassinosteroid insensitive 1-associated receptor kinase 1 [EC:2.7.10.1 2.7.11.1] | (RefSeq) somatic embryogenesis receptor-like kinase-like protein precursor (A)
GLYMA_08G015700	2400	45.9233	12.8933	1970.33	611	-1.77842	down	1.37458e-12	5.42088e-11	At5g41330	--
GLYMA_18G287900	7066	24.8433	50.8	1083.67	2508.67	1.09822	up	1.3974e-12	5.50451e-11	At5g02490	K03283 heat shock 70kDa protein 1/2/6/8 | (RefSeq) heat shock cognate 70 kDa protein 2 (A)
GLYMA_16G154100	1082	3.25333	11.6367	63	259.667	1.91562	up	1.40434e-12	5.52502e-11	At5g19790	K09286 EREBP-like factor | (RefSeq) ethylene-responsive transcription factor ERN1 (A)
GLYMA_02G182600	2704	1.78667	6.54	39	158.333	1.9306	up	1.40584e-12	5.52502e-11	At2g41870	--
GLYMA_13G215000	2810	131.797	269.567	4847.67	11221.3	1.09812	up	1.41532e-12	5.55585e-11	At5g18670	K01177 beta-amylase [EC:3.2.1.2] | (RefSeq) beta-amylase 1, chloroplastic (A)
GLYMA_03G171600	5675	5.12	0.84	158.667	28.6667	-2.56057	down	1.4214e-12	5.57212e-11	At3g53720	--
GLYMA_02G151900	1045	9.89667	2.53333	184.667	54	-1.89084	down	1.42272e-12	5.57212e-11	--	--
GLYMA_05G132900	5436	81.4167	38.5967	4827.33	2564	-1.01633	down	1.565e-12	6.12233e-11	At5g44790	K17686 P-type Cu+ transporter [EC:7.2.2.8] | (RefSeq) copper-transporting ATPase RAN1 (A)
GLYMA_11G192800	3200	5.86	0.886667	294.333	53.3333	-2.61886	down	1.58795e-12	6.205e-11	At2g28160	K13422 transcription factor MYC2 | (RefSeq) transcription factor MYC2 (A)
GLYMA_06G298600	745	48.43	143.723	645	2198.67	1.63707	up	1.62954e-12	6.36025e-11	At4g10270	--
GLYMA_05G040800	2752	13.3067	5.43333	655	294.667	-1.23955	down	1.70553e-12	6.64922e-11	At3g26600	--
GLYMA_15G087600	4624	2.74333	0.666667	194	52	-1.99244	down	1.76872e-12	6.88771e-11	At2g14640_2	--
GLYMA_15G248000	1164	2.61667	10.9033	54.6667	263	2.13687	up	1.85128e-12	7.20102e-11	--	--
GLYMA_12G173300	5888	3.16	9.24	98.6667	323.333	1.61196	up	2.18172e-12	8.47667e-11	At5g60580	--
GLYMA_17G111400	2971	50.77	101.38	2702	6005.33	1.05824	up	2.19404e-12	8.51487e-11	At5g20250	K06617 raffinose synthase [EC:2.4.1.82] | (RefSeq) probable galactinol--sucrose galactosyltransferase 6 (A)
GLYMA_07G165300	1054	36.8133	78.7833	694	1670.67	1.15891	up	2.36601e-12	9.17186e-11	--	--
GLYMA_09G014400	754	75.0667	24.61	1010.33	364.333	-1.5585	down	2.39543e-12	9.27536e-11	At4g12490	--
GLYMA_12G155900	16366	12.39	26.3333	770.333	1820.33	1.14536	up	2.40139e-12	9.28792e-11	At1g53430	K13416 brassinosteroid insensitive 1-associated receptor kinase 1 [EC:2.7.10.1 2.7.11.1] | (RefSeq) somatic embryogenesis receptor-like kinase-like protein precursor (A)
GLYMA_10G057800	6135	11.0367	22.1067	720.333	1623	1.06542	up	2.40485e-12	9.29077e-11	At1g72650	--
GLYMA_06G220200	4415	1.73667	5.32667	101	346.667	1.68395	up	2.43634e-12	9.40178e-11	At2g24130	K13420 LRR receptor-like serine/threonine-protein kinase FLS2 [EC:2.7.11.1] | (RefSeq) probable LRR receptor-like serine/threonine-protein kinase At3g47570 (A)
GLYMA_17G137300	2243	77.11	175.763	1134	2896.67	1.24946	up	2.49853e-12	9.63091e-11	At1g62790	--
GLYMA_19G089800	6433	2.83	0.853333	235	78	-1.67601	down	2.59581e-12	9.99459e-11	At3g27170	K05016 chloride channel 7 | (RefSeq) chloride channel protein CLC-b isoform X1 (A)
GLYMA_12G076700	6142	2.91667	9.79667	78	299.333	1.81606	up	2.68247e-12	1.03167e-10	At3g53450	K22522 cytokinin riboside 5'-monophosphate phosphoribohydrolase [EC:3.2.2.-] | (RefSeq) cytokinin riboside 5'-monophosphate phosphoribohydrolase LOG1 (A)
GLYMA_16G084000	5087	0.67	2.13667	61	216.333	1.73556	up	2.70158e-12	1.03785e-10	At1g11170	K13944 LOB domain-containing protein 16 | (RefSeq) LOB domain-containing protein 16 (A)
GLYMA_19G136100	4716	0.83	3.78333	37.3333	193	2.24997	up	2.75247e-12	1.05621e-10	At2g41540	K00006 glycerol-3-phosphate dehydrogenase (NAD+) [EC:1.1.1.8] | (RefSeq) glycerol-3-phosphate dehydrogenase [NAD(+)] GPDHC1, cytosolic (A)
GLYMA_02G221200	1902	10.3067	27.3567	266	793	1.47077	up	2.8807e-12	1.10417e-10	At5g24600	--
GLYMA_08G338200	1857	17.6033	5.48667	584.667	203	-1.62491	down	2.9223e-12	1.11886e-10	At4g01070	K08237 hydroquinone glucosyltransferase [EC:2.4.1.218] | (RefSeq) hydroquinone glucosyltransferase (A)
GLYMA_15G238200	12593	15.9233	44.9433	253.667	809.333	1.56398	up	3.07464e-12	1.17587e-10	At1g35720	K17098 annexin D | (RefSeq) uncharacterized protein LOC100796092 (A)
GLYMA_06G298800	261	0.926667	11.8333	4.33333	63	3.74573	up	3.10363e-12	1.18563e-10	At4g10270	--
GLYMA_19G165600	7734	0.46	3.28667	11.6667	92	2.88557	up	3.1877e-12	1.21638e-10	At1g56010	--
GLYMA_06G042000	198	3.28333	23.2067	11.6667	94.6667	2.89454	up	3.21051e-12	1.22372e-10	--	--
GLYMA_13G101100	2091	5.16	18.9933	122	515	1.94655	up	3.26597e-12	1.24307e-10	At5g57150	K13422 transcription factor MYC2 | (RefSeq) transcription factor MYC1 (A)
GLYMA_09G225400	3068	2.62667	0.5	108.333	23	-2.3339	down	3.26855e-12	1.24307e-10	At3g63440	K00279 cytokinin dehydrogenase [EC:1.5.99.12] | (RefSeq) cytokinin dehydrogenase 6 (A)
GLYMA_13G220100	2786	0.943333	4.80333	31	171	2.39707	up	3.42762e-12	1.30211e-10	At2g34650	K08286 protein-serine/threonine kinase [EC:2.7.11.-] | (RefSeq) protein kinase PINOID 2 (A)
GLYMA_07G087200	821	63.83	24.03	809	347.333	-1.34039	down	3.44246e-12	1.3063e-10	At3g61640	--
GLYMA_14G156300	1501	2.01	7.69667	54	237.333	2.01501	up	3.48295e-12	1.31935e-10	At1g21550	K13448 calcium-binding protein CML | (RefSeq) calcium-binding EF-hand family protein (A)
GLYMA_16G145500	6077	6.52667	1.90333	252.333	83	-1.70809	down	3.48458e-12	1.31935e-10	At1g11310	K08472 mlo protein | (RefSeq) MLO-like protein 12 (A)
GLYMA_13G337400	2995	11.6833	26.4467	625.667	1582.67	1.23775	up	3.60411e-12	1.36309e-10	At1g07530	K14494 DELLA protein | (RefSeq) DELLA protein 1 (A)
GLYMA_14G077500	4160	10.1833	21.1	645.667	1491	1.11228	up	3.66809e-12	1.38576e-10	At3g18850	K13513 lysocardiolipin and lysophospholipid acyltransferase [EC:2.3.1.- 2.3.1.51] | (RefSeq) uncharacterized protein LOC100808657 (A)
GLYMA_14G087500	3013	1.15333	3.68333	62.3333	219.333	1.72803	up	3.85904e-12	1.45629e-10	At5g67360	--
GLYMA_07G037000	5707	11.3967	3.88333	998.333	378	-1.49552	down	3.95102e-12	1.48935e-10	At5g17680	K13457 disease resistance protein RPM1 | (RefSeq) disease resistance protein RPM1 (A)
GLYMA_12G074100	20894	1.97667	0.526667	198	58.6667	-1.84319	down	4.00119e-12	1.5066e-10	At3g45780	K20715 phototropin [EC:2.7.11.1] | (RefSeq) phototropin-1 (A)
GLYMA_20G135300	5359	14.21	69.4667	519	2767.33	2.32904	up	4.02134e-12	1.51252e-10	At1g49960	K23717 solute carrier family 23 (nucleobase transporter), member 2 | (RefSeq) nucleobase-ascorbate transporter 4 (A)
GLYMA_03G186300	7995	28.2733	11.6433	1903	882.333	-1.21405	down	4.10428e-12	1.54202e-10	At3g09920	K00889 1-phosphatidylinositol-4-phosphate 5-kinase [EC:2.7.1.68] | (RefSeq) phosphatidylinositol 4-phosphate 5-kinase 9 (A)
GLYMA_15G263100	4230	52.9767	20.94	2002	868	-1.28544	down	4.22439e-12	1.5854e-10	At1g16350	K00088 IMP dehydrogenase [EC:1.1.1.205] | (RefSeq) IMPDH1; inosine monophosphate dehydrogenase (A)
GLYMA_05G049400	2982	51.56	20.4367	1466	659	-1.27077	down	4.6071e-12	1.72713e-10	At1g12710	--
GLYMA_13G185000	7365	4.3	14.1767	227.667	813.333	1.76812	up	4.69892e-12	1.75962e-10	At1g61240	--
GLYMA_08G273100	8412	11.92	3.15	749.667	230.667	-1.83706	down	4.71741e-12	1.76461e-10	At4g37870	K01610 phosphoenolpyruvate carboxykinase (ATP) [EC:4.1.1.49] | (RefSeq) phosphoenolpyruvate carboxykinase (ATP) 1 (A)
GLYMA_14G171500	1795	29.8433	61.28	958	2196	1.1006	up	4.79279e-12	1.79084e-10	At1g78080	K09286 EREBP-like factor | (RefSeq) ethylene-responsive transcription factor RAP2-4 (A)
GLYMA_07G136800	752	141.887	464.183	1909	7218	1.77977	up	4.89735e-12	1.82792e-10	--	--
GLYMA_14G148300	5109	0.166667	2.06667	5	69.3333	3.6732	up	4.91635e-12	1.83301e-10	At1g44800	--
GLYMA_01G097400	8988	3.73667	0.92	201.667	56	-1.95626	down	5.06039e-12	1.88465e-10	At4g37870	K01610 phosphoenolpyruvate carboxykinase (ATP) [EC:4.1.1.49] | (RefSeq) phosphoenolpyruvate carboxykinase (ATP) 1 isoform X1 (A)
GLYMA_16G210500	3831	2.55667	7.16	160.333	497.667	1.54328	up	5.12502e-12	1.90514e-10	At5g25930	K00924 kinase [EC:2.7.1.-] | (RefSeq) NARK; nodule autoregulation receptor kinase precursor (A)
GLYMA_18G094200	2582	0.936667	3.15333	41.3333	155.667	1.81323	up	5.12656e-12	1.90514e-10	At3g07040	K13457 disease resistance protein RPM1 | (RefSeq) disease resistance protein RPM1 (A)
GLYMA_08G321100	6392	83.6267	33.5467	2753.33	1243	-1.25481	down	5.16113e-12	1.9159e-10	At5g10770	K22683 aspartyl protease family protein [EC:3.4.23.-] | (RefSeq) aspartyl protease family protein 2 (A)
GLYMA_14G090700	14872	3.88	10.58	359	1072	1.49808	up	5.27146e-12	1.95473e-10	At1g10080	K21989 calcium permeable stress-gated cation channel | (RefSeq) CSC1-like protein RXW8 (A)
GLYMA_06G127400	13319	61.7967	18.42	8009.67	2608.33	-1.68946	down	5.32742e-12	1.97334e-10	At5g53460	K00264 glutamate synthase (NADH) [EC:1.4.1.14] | (RefSeq) glutamate synthase [NADH], amyloplastic isoform X1 (A)
GLYMA_14G088900	1816	83.8033	33.5167	1865	850.667	-1.25257	down	5.33874e-12	1.97539e-10	At3g01400	K08332 vacuolar protein 8 | (RefSeq) U-box domain-containing protein 15-like (A)
GLYMA_14G087100	3717	6.95333	15.9667	236	613	1.26667	up	5.36678e-12	1.98362e-10	At5g43080	K06627 cyclin-A | (RefSeq) putative cyclin-A3-1 (A)
GLYMA_01G216000	9304	12.72	3.19667	2115.67	624	-1.91099	down	6.14131e-12	2.26744e-10	At1g12610	K09286 EREBP-like factor | (RefSeq) AP2 domain transcription factor TINY (A)
GLYMA_07G253600	1097	11.0267	1.46667	216.333	34	-2.81668	down	6.39146e-12	2.3555e-10	At3g21550	--
GLYMA_06G017800	4702	1.31667	3.85333	85	276.667	1.60766	up	6.39363e-12	2.3555e-10	At1g20640	--
GLYMA_08G352300	3627	8.8	3.12	468.333	189	-1.42528	down	6.50459e-12	2.3938e-10	At1g11350	K13415 protein brassinosteroid insensitive 1 [EC:2.7.10.1 2.7.11.1] | (RefSeq) BRI1B; brassinosteroid receptor precursor (A)
GLYMA_03G209800	4984	6.07667	2.43333	475.667	212.667	-1.25765	down	6.62495e-12	2.43457e-10	At2g47890	--
GLYMA_10G022300	959	23.6767	5.00333	405.667	101	-2.15678	down	6.63217e-12	2.43457e-10	--	--
GLYMA_10G259500	2952	8.71	18.4267	347	818	1.14301	up	6.63677e-12	2.43457e-10	At3g19540	--
GLYMA_06G042200	907	0.676667	4.63667	11	85.3333	2.8436	up	6.66797e-12	2.4434e-10	At4g36830	--
GLYMA_20G227300	3452	34.63	11.03	1636.33	600.333	-1.57961	down	6.90083e-12	2.52388e-10	At3g04350	--
GLYMA_15G206100	4374	35.46	68.9867	2319.33	5074	1.02397	up	6.90239e-12	2.52388e-10	At2g24300	--
GLYMA_19G239800	4799	24.3233	8.92333	652	265.667	-1.38388	down	6.91344e-12	2.52522e-10	At3g06350	K13832 3-dehydroquinate dehydratase / shikimate dehydrogenase [EC:4.2.1.10 1.1.1.25] | (RefSeq) bifunctional 3-dehydroquinate dehydratase/shikimate dehydrogenase, chloroplastic isoform X2 (A)
GLYMA_13G257500	790	11.66	58.5833	163.667	924	2.37916	up	7.03691e-12	2.56757e-10	--	--
GLYMA_07G095900	11554	22.29	47.0767	1083.67	2585.33	1.14392	up	7.15062e-12	2.60628e-10	At1g18390	K13430 serine/threonine-protein kinase PBS1 [EC:2.7.11.1] | (RefSeq) serine/threonine-protein kinase (A)
GLYMA_04G229700	1215	2.01333	9.11333	43.6667	231	2.25908	up	7.24786e-12	2.63787e-10	At5g03890	--
GLYMA_12G084900	1774	50.9767	21.6933	1373	658	-1.17007	down	7.25275e-12	2.63787e-10	At2g27830	--
GLYMA_07G234400	953	1.30333	12.1	22	239.667	3.28464	up	7.39987e-12	2.68852e-10	At4g24130	--
GLYMA_03G055900	10229	81.81	38.22	5024.67	2644	-1.03375	down	7.56182e-12	2.74256e-10	At2g38280	K01490 AMP deaminase [EC:3.5.4.6] | (RefSeq) AMP deaminase (A)
GLYMA_02G033600	7781	15.5067	43.61	947.667	2951	1.54782	up	7.5647e-12	2.74256e-10	At1g70300	K03549 KUP system potassium uptake protein | (RefSeq) potassium transporter 6 (A)
GLYMA_11G022800	2511	7.11333	0.91	223.667	32.6667	-2.89533	down	7.58414e-12	2.7467e-10	At5g52430	--
GLYMA_15G044200	858	8.97333	27.3767	137.667	484	1.68452	up	7.65362e-12	2.76892e-10	--	--
GLYMA_03G162800	3360	15.06	33.94	903.667	2291.67	1.23199	up	7.72387e-12	2.79138e-10	At2g38940	K08176 MFS transporter, PHS family, inorganic phosphate transporter | (RefSeq) PHT1-2; inorganic phosphate transporter 1-2 (A)
GLYMA_14G214500	2359	2.02333	8.67667	47.3333	228.333	2.15711	up	7.79634e-12	2.81459e-10	At1g66230	K09422 transcription factor MYB, plant | (RefSeq) transcription factor MYB32-like (A)
GLYMA_15G247800	716	1.16667	8.14	15	122	2.88243	up	8.15146e-12	2.93969e-10	--	--
GLYMA_02G064400	1541	107.53	26.8667	1684	489.333	-1.91634	down	8.35587e-12	3.01023e-10	At2g02990	K01166 ribonuclease T2 [EC:4.6.1.19] | (RefSeq) ribonuclease T2 family protein precursor (A)
GLYMA_07G161900	6653	1.90333	9.88333	89.6667	534	2.44053	up	8.46165e-12	3.04512e-10	At1g49430	K01897 long-chain acyl-CoA synthetase [EC:6.2.1.3] | (RefSeq) long chain acyl-CoA synthetase 2 (A)
GLYMA_17G065100	1515	64.4167	136.4	1434.67	3426.67	1.14526	up	8.70451e-12	3.12923e-10	At4g25810	K14504 xyloglucan:xyloglucosyl transferase TCH4 [EC:2.4.1.207] | (RefSeq) probable xyloglucan endotransglucosylase/hydrolase protein 23 (A)
GLYMA_18G217100	4532	16.32	42.92	830.667	2395.67	1.44688	up	8.72023e-12	3.13158e-10	At3g08650	--
novel.542	4690	0.503333	1.77667	42.3333	167	1.88123	up	8.76517e-12	3.14441e-10	--	--
GLYMA_14G046000	3044	2.27	0.476667	113.667	26.6667	-2.18823	down	8.9323e-12	3.20101e-10	At1g45616	--
GLYMA_06G068000	3722	5.02	1.42667	241.333	77.3333	-1.74692	down	9.603e-12	3.43775e-10	At3g11760	--
GLYMA_16G210800	9137	3.63	1.25333	317.667	123.667	-1.46488	down	9.66966e-12	3.45799e-10	At5g36930	K13457 disease resistance protein RPM1 | (RefSeq) disease resistance protein RPM1 (A)
GLYMA_03G201500	1079	71.6767	18.8367	1381.33	400.667	-1.87689	down	1.00435e-11	3.58794e-10	At2g35980	--
GLYMA_01G036300	677	8.07333	1.52333	97.6667	21.3333	-2.31582	down	1.05502e-11	3.76501e-10	--	--
GLYMA_18G281400	4160	2.16667	6.71	53.6667	187.333	1.69729	up	1.156e-11	4.12105e-10	At5g07310	K09286 EREBP-like factor | (RefSeq) ethylene-responsive transcription factor 1A (A)
GLYMA_15G031000	195	69.7933	205.13	243.333	826.333	1.62815	up	1.17822e-11	4.1959e-10	--	--
GLYMA_01G235000	1439	5.75	19.8333	109.333	428	1.84685	up	1.18295e-11	4.20536e-10	At1g05450	--
GLYMA_03G245200	2068	25.3333	65.9967	938	2736.67	1.43991	up	1.19973e-11	4.25915e-10	At5g28040	--
GLYMA_13G257800	983	4.04333	18.8267	70.6667	364.333	2.26697	up	1.20505e-11	4.27361e-10	--	--
GLYMA_03G082100	1360	18.6333	53.3433	202.667	663.667	1.58672	up	1.23842e-11	4.3874e-10	--	--
GLYMA_01G150500	2453	6.19	18.4733	163.667	563.667	1.65125	up	1.2479e-11	4.41639e-10	At5g01380	--
GLYMA_07G186600	3723	4.19	10.4933	223.333	627.667	1.39112	up	1.25131e-11	4.41988e-10	At1g61740	--
GLYMA_20G121300	5304	4.62	9.98333	268	654.333	1.17787	up	1.2522e-11	4.41988e-10	At1g15080	K18693 diacylglycerol diphosphate phosphatase / phosphatidate phosphatase [EC:3.1.3.81 3.1.3.4] | (RefSeq) uncharacterized protein LOC100785459 (A)
GLYMA_08G122200	13230	18.8067	6.33333	1588.33	615.333	-1.49577	down	1.25276e-11	4.41988e-10	At2g25740_1	--
GLYMA_13G186600	7526	3.18667	10.1067	167	593.667	1.72788	up	1.27502e-11	4.49375e-10	At5g13750	--
GLYMA_09G203100	2646	5.50333	15.8867	177.667	580.333	1.59219	up	1.29152e-11	4.54685e-10	At3g53440	--
GLYMA_13G229000	4677	2.94667	0.92	235.333	80.6667	-1.62669	down	1.29275e-11	4.54685e-10	At1g29240	--
GLYMA_17G100800	3163	1.83333	9.50667	76.3333	446	2.4294	up	1.30507e-11	4.58547e-10	At1g74460	--
GLYMA_04G066600	3698	3.23667	0.57	155.333	32	-2.41127	down	1.31827e-11	4.62709e-10	At2g25460	--
GLYMA_19G228000	549	23.2433	78.61	228	887	1.82457	up	1.44752e-11	5.07032e-10	At1g09250	--
GLYMA_12G070300	2819	5.4	1.74	225.333	82	-1.56448	down	1.45428e-11	5.08881e-10	At3g45260	--
GLYMA_13G073900	4261	22.44	9.73333	763.333	374.667	-1.13873	down	1.51048e-11	5.28003e-10	At1g14370	K13430 serine/threonine-protein kinase PBS1 [EC:2.7.11.1] | (RefSeq) serine/threonine-protein kinase PBS1 isoform X2 (A)
GLYMA_14G010600	894	2.40333	10.1867	38.3333	183.333	2.1432	up	1.54475e-11	5.39432e-10	At3g13310	K03686 molecular chaperone DnaJ | (RefSeq) chaperone protein dnaJ A6, chloroplastic (A)
GLYMA_04G016100	2455	7.26333	17.1333	129	338.333	1.2955	up	1.57675e-11	5.50041e-10	At2g33700	K14803 protein phosphatase PTC2/3 [EC:3.1.3.16] | (RefSeq) probable protein phosphatase 2C 27 (A)
GLYMA_13G260400	987	14.0533	51.6067	247.667	1054.33	1.94564	up	1.61088e-11	5.61377e-10	--	--
GLYMA_01G141100	1762	15.0767	5.45	476	194.667	-1.39885	down	1.61928e-11	5.63728e-10	At2g45360	--
GLYMA_13G176600	5465	47.3033	16.9267	2094.33	858.333	-1.41319	down	1.62376e-11	5.64711e-10	At1g28380	--
GLYMA_11G253900	1682	24.0133	54	515.667	1273.33	1.22079	up	1.62725e-11	5.65349e-10	At3g23730	K08235 xyloglucan:xyloglucosyl transferase [EC:2.4.1.207] | (RefSeq) uncharacterized protein LOC100784191 precursor (A)
GLYMA_19G212500	2155	1.64667	5.06333	57	192.333	1.67068	up	1.7231e-11	5.9804e-10	At4g02330	K01051 pectinesterase [EC:3.1.1.11] | (RefSeq) probable pectinesterase/pectinesterase inhibitor 20 (A)
GLYMA_02G088700	3105	11.7767	2.38333	520.667	119.667	-2.24008	down	1.72485e-11	5.9804e-10	At1g66880	K20718 LRR receptor-like serine/threonine-protein kinase ERECTA [EC:2.7.11.1] | (RefSeq) LRR receptor-like serine/threonine-protein kinase ERL1 (A)
GLYMA_09G050700	4005	4.47667	10.0833	269.333	672.333	1.22914	up	1.73377e-11	6.00524e-10	At5g44730	K20185 biogenesis of lysosome-related organelles complex 1 subunit 1 | (RefSeq) biogenesis of lysosome-related organelles complex 1 subunit 1-like (A)
GLYMA_12G176500	1287	29.5167	83.1267	680.667	2118.67	1.54888	up	1.74864e-11	6.05061e-10	At3g57120	K13429 chitin elicitor receptor kinase 1 | (RefSeq) lysM domain receptor-like kinase 3 (A)
GLYMA_15G245000	1060	0	4.83	0	83.3333	8.65427	up	1.78427e-11	6.16764e-10	At3g14680	K17873 11-oxo-beta-amyrin 30-oxidase [EC:1.14.14.115] | (RefSeq) 11-oxo-beta-amyrin 30-oxidase (A)
GLYMA_12G218600	381	0.146667	9.34667	1	71	6.05077	up	1.94124e-11	6.70346e-10	--	--
GLYMA_14G023000	1327	8.79667	2.63	208.667	71.3333	-1.66606	down	1.94645e-11	6.71467e-10	At4g38460	K13789 geranylgeranyl diphosphate synthase, type II [EC:2.5.1.1 2.5.1.10 2.5.1.29] | (RefSeq) GPPS; geranyl-diphosphate synthase (A)
GLYMA_08G142400	3329	7.37667	1.50667	139.333	32	-2.22805	down	1.96545e-11	6.77338e-10	At5g26170	K18835 WRKY transcription factor 2 | (RefSeq) WRKY59; probable WRKY transcription factor 2 (A)
GLYMA_18G096400	5586	20.08	45.6667	1607.33	4185	1.25596	up	1.97393e-11	6.79574e-10	At1g48120_1	K03113 translation initiation factor 1 | (RefSeq) protein translation factor SUI1 homolog 2 (A)
GLYMA_03G201700	1353	7.06333	18.9533	171.333	523.333	1.4937	up	2.02631e-11	6.96904e-10	--	--
GLYMA_15G256000	920	10.0367	36.06	107.333	450.333	1.92456	up	2.0465e-11	7.03138e-10	--	--
GLYMA_07G190700	5393	9.34	3.45667	456.667	185.667	-1.38181	down	2.10585e-11	7.22803e-10	At5g57580	--
GLYMA_04G206800	829	3.47333	13.3267	51.3333	226.333	2.00991	up	2.13845e-11	7.33255e-10	At5g53590	K14488 SAUR family protein | (RefSeq) auxin-induced protein 6B-like (A)
GLYMA_16G060700	1109	94.4733	18.7433	1578.33	372.667	-2.25023	down	2.16969e-11	7.43222e-10	At3g05950	--
GLYMA_20G116000	2315	8.63	23.7467	323.667	1021.33	1.53353	up	2.18099e-11	7.46346e-10	At1g68490	--
GLYMA_13G112000	3626	479.857	191.507	20264.7	9205.33	-1.25708	down	2.3031e-11	7.87341e-10	At1g19180	K13464 jasmonate ZIM domain-containing protein | (RefSeq) protein TIFY 10A-like (A)
GLYMA_10G273200	1096	7.21333	1.61667	141.333	36.3333	-2.07815	down	2.31055e-11	7.89101e-10	At1g25400	--
GLYMA_12G047400	8159	0.583333	2.39333	33.6667	155.667	2.09728	up	2.31518e-11	7.89891e-10	At1g49430	K01897 long-chain acyl-CoA synthetase [EC:6.2.1.3] | (RefSeq) long chain acyl-CoA synthetase 2 (A)
GLYMA_13G291700	4530	36.2767	84.5033	1087.67	2870.67	1.2825	up	2.36811e-11	8.07142e-10	At2g42570	K23877 xyloglucan O-acetyltransferase | (RefSeq) protein ALTERED XYLOGLUCAN 4 (A)
GLYMA_12G116800	3048	142.24	475.33	3187.33	12445.7	1.81556	up	2.46204e-11	8.37487e-10	At2g20630	K17506 protein phosphatase 1L [EC:3.1.3.16] | (RefSeq) probable protein phosphatase 2C 58 (A)
GLYMA_06G168100	3108	0.326667	2.95667	9	93	3.26198	up	2.47932e-11	8.42523e-10	At1g08510	K10781 fatty acyl-ACP thioesterase B [EC:3.1.2.14 3.1.2.21] | (RefSeq) palmitoyl-acyl carrier protein thioesterase, chloroplastic isoform X1 (A)
GLYMA_03G263600	2937	6.8	1.88667	357.667	107	-1.80589	down	2.50511e-11	8.50442e-10	At3g14240	--
GLYMA_13G160100	3091	21.09	54.26	1168	3270.33	1.41454	up	2.55286e-11	8.65792e-10	At5g20250	K06617 raffinose synthase [EC:2.4.1.82] | (RefSeq) probable galactinol--sucrose galactosyltransferase 6 isoform X1 (A)
GLYMA_03G117800	1374	1.94	7.17	33	138.333	1.95435	up	2.71139e-11	9.18645e-10	At3g60520	--
GLYMA_14G212500	10512	12.14	2.81333	719.667	193	-2.02928	down	2.73289e-11	9.25012e-10	At3g02850	K21867 potassium channel | (RefSeq) potassium channel SKOR (A)
GLYMA_10G014400	4201	73.8067	34.39	4081	2119.33	-1.04147	down	2.73975e-11	9.26417e-10	At1g02660	--
GLYMA_13G329700	4583	31.4	80.2567	1476	4188.33	1.41201	up	2.78228e-11	9.39866e-10	At2g28550	K09284 AP2-like factor, euAP2 lineage | (RefSeq) ethylene-responsive transcription factor RAP2-7 isoform X1 (A)
GLYMA_08G203000	1904	33.6533	12.92	656.667	283	-1.3169	down	2.87551e-11	9.70399e-10	At3g16240	K09873 aquaporin TIP | (RefSeq) TIP2-4; aquaporin TIP2-4 (A)
GLYMA_11G129900	3069	104.21	20.42	3416.33	787.333	-2.27198	down	2.90598e-11	9.79713e-10	At2g44480	K01188 beta-glucosidase [EC:3.2.1.21] | (RefSeq) cyanogenic beta-glucosidase (A)
GLYMA_03G108000	17395	1.63667	7.55	45	241.667	2.28778	up	2.96975e-11	1.00023e-09	--	--
GLYMA_03G054300	784	0	4.05	0	60	8.23947	up	3.00439e-11	1.0109e-09	--	--
GLYMA_08G026300	4636	16.4067	7.50667	921	473	-1.06441	down	3.06131e-11	1.02904e-09	At5g24320	K20241 WD repeat-containing protein 44 | (RefSeq) WD repeat-containing protein 44 (A)
GLYMA_03G156600	7888	2.52667	5.70333	319	793.333	1.23167	up	3.18741e-11	1.07005e-09	At1g03080	--
GLYMA_02G036400	1837	1.35	4.67333	44.3333	176	1.86529	up	3.18959e-11	1.07005e-09	At1g23390	--
GLYMA_16G057100	1842	5.24333	1.59333	172.667	58.6667	-1.66174	down	3.19528e-11	1.07091e-09	At5g63450	K20665 jasmonoyl-L-amino acid 12-hydroxylase [EC:1.14.14.48] | (RefSeq) cytochrome P450 94B3 (A)
GLYMA_06G254900	7587	21.67	9.61333	1149.67	576.667	-1.10428	down	3.21174e-11	1.07537e-09	At2g20900	K00901 diacylglycerol kinase (ATP) [EC:2.7.1.107] | (RefSeq) DGK8; diacylglycerol kinase 5 isoform X2 (A)
GLYMA_08G277000	4528	16.1267	4.97333	757.667	267	-1.62819	down	3.24077e-11	1.08402e-09	At4g15560	K01662 1-deoxy-D-xylulose-5-phosphate synthase [EC:2.2.1.7] | (RefSeq) probable 1-deoxy-D-xylulose-5-phosphate synthase 2, chloroplastic (A)
GLYMA_02G062600	3345	0.59	4.32667	15	124.333	2.93	up	3.43838e-11	1.14787e-09	At2g23540	--
GLYMA_03G254500	3527	2.78	6.60667	175.667	459	1.30321	up	3.5158e-11	1.17258e-09	At3g61590	--
GLYMA_01G199600	5357	5.42667	1.96	306	124	-1.4032	down	3.54173e-11	1.18007e-09	At2g35350	K01102 pyruvate dehydrogenase phosphatase [EC:3.1.3.43] | (RefSeq) probable protein phosphatase 2C 4 (A)
GLYMA_13G349900	1711	75.21	144.03	2302.33	4977.33	1.00108	up	3.75323e-11	1.24932e-09	At1g17620	--
GLYMA_01G182400	6362	28.8167	70.3533	1541.67	4210.67	1.34502	up	3.76425e-11	1.25167e-09	At2g23450	K13429 chitin elicitor receptor kinase 1 | (RefSeq) chitin elicitor receptor kinase 1 (A)
GLYMA_15G191800	1522	2.81	14.76	42	257.667	2.46923	up	3.76763e-11	1.25167e-09	At4g20390	--
GLYMA_03G096500	2889	7.04333	0.0766667	209.667	2.66667	-6.40713	down	3.77768e-11	1.25286e-09	At1g55290	K06892 feruloyl-CoA 6-hydroxylase [EC:1.14.11.61] | (RefSeq) feruloyl CoA ortho-hydroxylase F6H1-3 (A)
GLYMA_12G084500	4141	16.2533	44.7033	521.333	1622.33	1.52264	up	3.77853e-11	1.25286e-09	At1g08230	K24917 amino acid permease | (RefSeq) amino acid permease 3 isoform X1 (A)
GLYMA_12G075600	1230	3.18333	9.91667	70	250.667	1.71521	up	3.89164e-11	1.28911e-09	At3g45210	--
GLYMA_11G038600	1558	354.973	122.247	7525	2944.33	-1.47208	down	3.90048e-11	1.29079e-09	At1g19180	K13464 jasmonate ZIM domain-containing protein | (RefSeq) uncharacterized protein LOC100306332 (A)
GLYMA_18G024400	984	5.07333	15.1667	62.3333	210.333	1.64528	up	3.92586e-11	1.29793e-09	At2g30130	K13944 LOB domain-containing protein 16 | (RefSeq) LOB domain-containing protein 16 (A)
GLYMA_07G091600	1679	206.957	639.153	3790.67	13252	1.68765	up	3.9528e-11	1.30557e-09	At3g02550	--
GLYMA_09G061900	2147	34.3267	15.4833	964.667	488.333	-1.08622	down	4.02292e-11	1.32745e-09	At2g24570	K13425 WRKY transcription factor 22 | (RefSeq) WRKY10; WRKY transcription factor 10 (A)
GLYMA_11G139500	3453	14.83	30.7667	745	1753.33	1.1186	up	4.11425e-11	1.35627e-09	At1g07630	K01102 pyruvate dehydrogenase phosphatase [EC:3.1.3.43] | (RefSeq) probable protein phosphatase 2C 4 (A)
GLYMA_08G079100	1110	10.4733	28.1567	207.333	630.667	1.48899	up	4.31565e-11	1.41992e-09	At5g06870	--
GLYMA_10G119400	5004	1.79333	0.236667	76	11.6667	-2.82967	down	4.37402e-11	1.43774e-09	At5g59190	--
GLYMA_11G056200	2424	27.49	8.88333	826.333	308.667	-1.55301	down	4.47585e-11	1.4698e-09	At4g36990	K09419 heat shock transcription factor, other eukaryote | (RefSeq) HSF-25; heat stress transcription factor 25 (A)
GLYMA_12G181100	5108	3.26	0.55	95.6667	19	-2.45873	down	4.49106e-11	1.47338e-09	At1g08230	K24917 amino acid permease | (RefSeq) amino acid permease 6 (A)
GLYMA_08G321400	3009	1.03667	3.89	37	152.333	1.96007	up	4.7262e-11	1.54903e-09	At5g10770	K22683 aspartyl protease family protein [EC:3.4.23.-] | (RefSeq) aspartyl protease family protein 2 (A)
GLYMA_16G008500	2384	44.3067	126.187	1463.67	4801.67	1.57844	up	4.82805e-11	1.5809e-09	At1g72540	K13430 serine/threonine-protein kinase PBS1 [EC:2.7.11.1] | (RefSeq) serine/threonine protein kinase (A)
GLYMA_16G199000	1409	51.6733	14.7733	1300.67	434.333	-1.72674	down	4.91095e-11	1.6065e-09	At5g51990	K09286 EREBP-like factor | (RefSeq) ethylene-responsive transcription factor ERF023 (A)
GLYMA_17G175500	4322	6.1	13.2167	218.667	533	1.17953	up	4.96578e-11	1.62288e-09	At3g19180_2	--
GLYMA_04G171800	1156	4.39667	11.0667	91	255.667	1.39102	up	5.05303e-11	1.64982e-09	At1g16390	K08202 MFS transporter, OCT family, solute carrier family 22 (organic cation transporter), member 4/5 | (RefSeq) organic cation/carnitine transporter 4 (A)
GLYMA_04G177900	2575	27.9767	8.65667	526.333	188.333	-1.61093	down	5.34159e-11	1.74071e-09	At5g62920	K14492 two-component response regulator ARR-A family | (RefSeq) response regulator ARR6-like (A)
GLYMA_19G085100	3724	18.85	48.6133	572.667	1618.33	1.4174	up	5.39661e-11	1.75696e-09	At3g27220	--
GLYMA_20G101400	5666	1.2	3.13333	75	219	1.44646	up	5.4774e-11	1.78156e-09	At5g46610	--
GLYMA_10G193600	1112	1.12	8.68333	15.6667	139	3.0189	up	5.51514e-11	1.79213e-09	At2g32300	--
GLYMA_10G194200	2441	40.83	100.587	1783	5056	1.37223	up	5.61717e-11	1.82355e-09	At5g07580	K09286 EREBP-like factor | (RefSeq) ethylene-responsive transcription factor 5-like (A)
GLYMA_07G057400	2949	60.3167	136.96	2058.67	5134.67	1.23581	up	5.68533e-11	1.84393e-09	At4g23810	K13425 WRKY transcription factor 22 | (RefSeq) WRKY transcription factor 22 (A)
GLYMA_11G189400	1516	13.83	5.57333	296	133.333	-1.25051	down	5.79484e-11	1.87766e-09	At2g27830	--
GLYMA_03G133800	3596	2.26333	7.5	48.3333	182.667	1.79834	up	5.92317e-11	1.91742e-09	At2g41540	K00006 glycerol-3-phosphate dehydrogenase (NAD+) [EC:1.1.1.8] | (RefSeq) glycerol-3-phosphate dehydrogenase [NAD(+)] GPDHC1, cytosolic (A)
GLYMA_16G020500	2010	17.9733	5.81	646.667	237	-1.56316	down	5.9334e-11	1.91892e-09	At4g00870	K13422 transcription factor MYC2 | (RefSeq) transcription factor MYC2 (A)
GLYMA_11G222600	2091	6.18667	14.7767	199.667	537	1.32528	up	6.09952e-11	1.97077e-09	At3g11410	K14497 protein phosphatase 2C [EC:3.1.3.16] | (RefSeq) protein phosphatase 2C 37 (A)
GLYMA_02G047400	2484	5.96	17.4167	129.333	412	1.59864	up	6.11084e-11	1.97257e-09	At4g38660	K12173 BRCA1-A complex subunit BRE | (RefSeq) BRISC and BRCA1-A complex member 2 (A)
GLYMA_12G048100	1036	0.0866667	2.73667	1.66667	57.6667	5.00329	up	6.26467e-11	2.02031e-09	--	K15082 DNA repair protein RAD7 | (RefSeq) uncharacterized protein LOC100797833 (A)
GLYMA_03G053600	2335	0	2.44	0	63	8.30041	up	6.28443e-11	2.02477e-09	At5g36930	--
GLYMA_02G237300	27250	5.16667	0.93	1241.33	267.667	-2.3807	down	6.43203e-11	2.07037e-09	At1g06840	K13430 serine/threonine-protein kinase PBS1 [EC:2.7.11.1] | (RefSeq) serine/threonine protein kinase (A)
GLYMA_11G081000	882	26.87	54.7667	423.667	973.667	1.09055	up	6.55119e-11	2.10675e-09	--	--
GLYMA_20G008300	980	0.593333	5.00667	10.3333	102.667	3.16403	up	6.73328e-11	2.16123e-09	--	--
GLYMA_12G230800	5393	1.98	4.89333	191	522.667	1.36034	up	6.75172e-11	2.16512e-09	At1g53380	--
GLYMA_16G088400	4693	7.27667	15.4867	381.667	921	1.15603	up	6.82775e-11	2.18744e-09	At3g07310	--
GLYMA_11G143300	2530	5.17333	13.7467	114.333	347	1.48281	up	6.83872e-11	2.1889e-09	At2g28690	--
GLYMA_05G143400	3139	25.2767	6.82667	538.333	170.333	-1.80562	down	6.96563e-11	2.22744e-09	--	--
GLYMA_11G164700	5360	3.31	16.4733	87	468	2.36528	up	6.99735e-11	2.23549e-09	At5g58490	K09753 cinnamoyl-CoA reductase [EC:1.2.1.44] | (RefSeq) cinnamoyl-CoA reductase 1 (A)
GLYMA_01G151600	7951	6.47	13.3067	565.667	1283	1.09505	up	7.3799e-11	2.3555e-09	At5g45280	K19882 O-palmitoleoyl-L-serine hydrolase [EC:3.1.1.98] | (RefSeq) pectin acetylesterase 8 isoform X1 (A)
GLYMA_05G161600	1845	1.73	7.00333	44	203	2.08214	up	7.39186e-11	2.35711e-09	At2g29420	K00799 glutathione S-transferase [EC:2.5.1.18] | (RefSeq) probable glutathione S-transferase (A)
GLYMA_19G258700	2159	4.83333	1.27	169	49	-1.88022	down	7.42305e-11	2.36273e-09	At3g61880	K20619 cytochrome P450 family 78 subfamily A | (RefSeq) cytochrome P450 78A3 (A)
GLYMA_06G058400	858	19.6533	4.04	301	73	-2.19645	down	7.42332e-11	2.36273e-09	At1g74930	K09286 EREBP-like factor | (RefSeq) ethylene-responsive transcription factor ERF023 (A)
GLYMA_06G125600	2175	45.54	15.71	1418.33	555.667	-1.47034	down	7.44635e-11	2.36786e-09	At4g23810	K13425 WRKY transcription factor 22 | (RefSeq) WRKY10; WRKY transcription factor 10 (A)
GLYMA_03G258800	2129	7.61	16.6367	289.667	711.667	1.19085	up	7.58624e-11	2.41009e-09	At3g61850	--
GLYMA_05G228100	2917	0.373333	1.63667	19.3333	94.6667	2.19741	up	7.79277e-11	2.47341e-09	At5g11590	K09286 EREBP-like factor | (RefSeq) DNA-binding domain-containing protein (A)
novel.360	2302	7.32	18.4667	301	870.333	1.40432	up	8.20762e-11	2.60266e-09	At5g12010	--
GLYMA_01G050100	2391	1.24	6.29	39	209.333	2.37861	up	8.31671e-11	2.63237e-09	At1g26770	K20628 expansin | (RefSeq) expansin-A15 (A)
GLYMA_13G088700	3262	40.0967	106.96	954.333	2944.33	1.49076	up	8.35453e-11	2.64189e-09	At1g35720	K17098 annexin D | (RefSeq) ANNEXIN; uncharacterized protein LOC100784252 (A)
GLYMA_03G129300	1859	2.61333	7.45667	62.3333	201.667	1.58196	up	8.57324e-11	2.70854e-09	At2g41380	--
GLYMA_13G227500	1984	3.97667	70.38	32	661.667	4.21234	up	8.65489e-11	2.73181e-09	--	--
GLYMA_13G134200	3094	37.0467	73.2033	1035.33	2285.33	1.04326	up	8.89733e-11	2.80574e-09	At3g55140	K01728 pectate lyase [EC:4.2.2.2] | (RefSeq) probable pectate lyase 4 (A)
GLYMA_17G238200	2003	18.3567	42.3033	461.667	1173.67	1.25755	up	8.97001e-11	2.82605e-09	At3g16150	K13051 L-asparaginase / beta-aspartyl-peptidase [EC:3.5.1.1 3.4.19.5] | (RefSeq) probable isoaspartyl peptidase/L-asparaginase 2 (A)
GLYMA_13G221900	4197	2.31333	7.05333	77.3333	262.667	1.66559	up	8.97994e-11	2.82657e-09	At2g22920	K16296 serine carboxypeptidase-like clade I [EC:3.4.16.-] | (RefSeq) serine carboxypeptidase-like 12 isoform X1 (A)
GLYMA_03G035300	4154	2.51333	0.626667	104	29	-1.9412	down	9.00791e-11	2.83277e-09	At3g08760	K13430 serine/threonine-protein kinase PBS1 [EC:2.7.11.1] | (RefSeq) serine/threonine-protein kinase (A)
GLYMA_18G031800	1920	12.5867	5.43333	363	174.667	-1.15196	down	9.17996e-11	2.88421e-09	At2g39870	--
GLYMA_02G182400	4116	2.93	7.17	131.333	356.333	1.35075	up	9.32316e-11	2.92651e-09	At3g57550	K00942 guanylate kinase [EC:2.7.4.8] | (RefSeq) guanylate kinase 2 (A)
GLYMA_02G203300	5685	10.59	21.5667	391	894.333	1.08677	up	9.34184e-11	2.92968e-09	At4g30950	K10255 acyl-lipid omega-6 desaturase (Delta-12 desaturase) [EC:1.14.19.23 1.14.19.45] | (RefSeq) FAD6.1; omega-6 fatty acid desaturase, chloroplastic (A)
GLYMA_17G237800	1595	6.55333	18.9667	187.333	621.333	1.60363	up	9.5493e-11	2.992e-09	At4g24210	K14495 F-box protein GID2 | (RefSeq) F-box protein GID2 (A)
GLYMA_06G266700	1853	29.34	7.44	427	126	-1.89664	down	9.71768e-11	3.03967e-09	At1g11530	K03671 thioredoxin 1 | (RefSeq) uncharacterized protein LOC100306379 (A)
GLYMA_08G156300	3632	0	1.24667	0	55	8.16175	up	9.71924e-11	3.03967e-09	CE29003	--
GLYMA_03G069300	2431	15.3467	6.69667	589	291.333	-1.12848	down	9.91902e-11	3.09931e-09	At3g55550	K13416 brassinosteroid insensitive 1-associated receptor kinase 1 [EC:2.7.10.1 2.7.11.1] | (RefSeq) BRASSINOSTEROID INSENSITIVE 1-associated receptor kinase 1 isoform X1 (A)
GLYMA_10G198400	558	16.52	2.92333	165	31.3333	-2.46228	down	9.99948e-11	3.12159e-09	--	--
GLYMA_10G052500	2553	3.75333	9.18	125.333	343.667	1.35118	up	1.04538e-10	3.26043e-09	At3g09010	K13416 brassinosteroid insensitive 1-associated receptor kinase 1 [EC:2.7.10.1 2.7.11.1] | (RefSeq) somatic embryogenesis receptor-like kinase-like protein precursor (A)
GLYMA_02G026300	2397	17.3333	35.93	557	1296	1.11228	up	1.05443e-10	3.28567e-09	At1g70000	--
GLYMA_17G059900	6111	1.71	4.37667	110	317.333	1.42207	up	1.07057e-10	3.33293e-09	At4g25850	K22285 oxysterol-binding protein-related protein 8 | (RefSeq) oxysterol-binding protein-related protein 4B isoform X1 (A)
GLYMA_19G162100	1539	10.23	3.11	281	95	-1.66723	down	1.08215e-10	3.36589e-09	At5g63450	K13407 fatty acid omega-hydroxylase [EC:1.14.-.-] | (RefSeq) cytochrome P450 94A1 (A)
GLYMA_08G068200	10352	11.9533	25.3533	345.333	830.333	1.15374	up	1.09854e-10	3.41378e-09	At2g22540	K09264 MADS-box transcription factor, plant | (RefSeq) MADS-box transcription factor 23 isoform X5 (A)
GLYMA_15G170500	5139	8.79	2.05	344.333	91.3333	-2.03623	down	1.1081e-10	3.44034e-09	At5g56960	--
GLYMA_09G237000	3949	4.93	16.2533	199.667	713	1.76637	up	1.11511e-10	3.45897e-09	At5g39660	--
GLYMA_06G015200	1035	3.16667	9.3	58.6667	190.333	1.60698	up	1.19306e-10	3.69739e-09	At1g76410	K19040 E3 ubiquitin-protein ligase ATL10/75/76/77/78 [EC:2.3.2.27] | (RefSeq) RING-H2 finger protein (A)
GLYMA_10G224900	4114	23.5667	45.9833	1212	2662.33	1.0282	up	1.20223e-10	3.72245e-09	At1g25280	K19600 tubby and related proteins | (RefSeq) tubby-like F-box protein 8 (A)
GLYMA_03G016300	978	13.9967	3.94	244.667	80	-1.74324	down	1.21265e-10	3.75131e-09	At2g45760	--
GLYMA_20G166500	2339	5.02	10.5567	210	495.333	1.13718	up	1.26234e-10	3.89795e-09	At1g21200	--
GLYMA_13G069200	2134	19.46	53.28	379.667	1202.33	1.52546	up	1.26918e-10	3.91553e-09	At3g28210	--
GLYMA_19G036800	3997	24.5767	61.1467	791.667	2254.67	1.38323	up	1.31919e-10	4.06445e-09	At3g30380	K01076 abhydrolase domain-containing protein 17 [EC:3.1.2.22] | (RefSeq) alpha/beta hydrolase domain-containing protein 17B (A)
GLYMA_08G325900	3510	7.08	2.39333	444	168.667	-1.50264	down	1.31983e-10	4.06445e-09	At5g48150	K14494 DELLA protein | (RefSeq) DELLA protein DWARF8 (A)
GLYMA_18G137500	2278	3.91333	10.5133	119.667	357.333	1.4817	up	1.33229e-10	4.09912e-09	At1g10550	K08235 xyloglucan:xyloglucosyl transferase [EC:2.4.1.207] | (RefSeq) probable xyloglucan endotransglucosylase/hydrolase protein 33 (A)
GLYMA_13G172500	4370	0.463333	2.98667	11.3333	83.6667	2.76404	up	1.35188e-10	4.15566e-09	At5g45960	--
GLYMA_09G153900	4319	7.30667	22.0033	243	792	1.63995	up	1.37141e-10	4.21191e-09	At2g36530	K01689 enolase [EC:4.2.1.11] | (RefSeq) enolase (A)
GLYMA_13G228400	2249	1.23667	5.59667	49.6667	259.333	2.24435	up	1.40651e-10	4.31581e-09	At4g18700	K07198 5'-AMP-activated protein kinase, catalytic alpha subunit [EC:2.7.11.11] | (RefSeq) CBL-interacting protein kinase 2 (A)
GLYMA_17G219700	771	3.47667	0.3	48	4.66667	-3.46451	down	1.42472e-10	4.36778e-09	At1g19210	K09286 EREBP-like factor | (RefSeq) ethylene-responsive transcription factor ERF011 (A)
GLYMA_02G158200	5552	178.267	405.823	2854.33	7458.67	1.25775	up	1.44332e-10	4.42084e-09	At1g71950	--
GLYMA_09G123900	1022	2.86667	8.65333	52.3333	177	1.65617	up	1.45304e-10	4.4466e-09	--	--
GLYMA_16G033500	4910	3.71333	8.28	136.333	338.333	1.2166	up	1.4582e-10	4.45841e-09	At5g41460	--
GLYMA_18G214000	4822	20.8067	6.15	1470.67	480.333	-1.7043	down	1.50132e-10	4.58365e-09	At3g08760	K13430 serine/threonine-protein kinase PBS1 [EC:2.7.11.1] | (RefSeq) serine/threonine-protein kinase (A)
novel.220	6052	0.296667	1.74	32.3333	199	2.58004	up	1.50185e-10	4.58365e-09	At1g20390	--
GLYMA_02G225600	772	6.27333	15.55	86.6667	240	1.36973	up	1.53106e-10	4.66865e-09	--	--
GLYMA_11G051300	1699	127.057	251.96	2303.67	5099.67	1.04493	up	1.5536e-10	4.73316e-09	--	--
GLYMA_02G234000	3783	6.13	16.8533	170.667	517.667	1.50896	up	1.57546e-10	4.79547e-09	At5g05340	K00430 peroxidase [EC:1.11.1.7] | (RefSeq) peroxidase P7 (A)
GLYMA_13G352700	5160	5.68	2.33	318	145.667	-1.22619	down	1.5834e-10	4.81536e-09	At2g19210	K13430 serine/threonine-protein kinase PBS1 [EC:2.7.11.1] | (RefSeq) serine/threonine-protein kinase (A)
GLYMA_16G175300	1630	37.25	89.6167	1085.67	2872.67	1.31665	up	1.59057e-10	4.82854e-09	At3g16520	K13263 isoflavone 7-O-glucosyltransferase [EC:2.4.1.170] | (RefSeq) UGT7; isoflavone 7-O-glucosyltransferase UGT7 (A)
GLYMA_02G083500	505	7.58333	28.37	63.6667	261	1.95521	up	1.60135e-10	4.85695e-09	--	--
GLYMA_20G066300	2503	1.31667	5.06667	29.6667	128.333	2.00882	up	1.6225e-10	4.91675e-09	At4g10150	K19039 E3 ubiquitin-protein ligase ATL7/58/59 [EC:2.3.2.27] | (RefSeq) RING-H2 finger protein ATL7 (A)
GLYMA_04G104500	3929	3.33333	8.42333	102.667	287.333	1.39532	up	1.69486e-10	5.12692e-09	At1g22170	K01834 2,3-bisphosphoglycerate-dependent phosphoglycerate mutase [EC:5.4.2.11] | (RefSeq) 2,3-bisphosphoglycerate-dependent phosphoglycerate mutase 1 isoform X2 (A)
GLYMA_05G054500	3664	9.01667	17.6633	286	625.667	1.0306	up	1.70235e-10	5.14501e-09	At1g12450	--
GLYMA_06G264100	2248	3.94	0.906667	136	35	-2.06021	down	1.71223e-10	5.1703e-09	At1g27170	--
GLYMA_20G158500	3040	0.0866667	1.39667	3	53.6667	4.06294	up	1.72903e-10	5.21641e-09	At5g52300	--
GLYMA_15G200100	2300	12.0733	24.0367	267	595.667	1.05516	up	1.74739e-10	5.26714e-09	At3g60670	--
GLYMA_20G185000	692	0.37	4.57333	4.66667	60.6667	3.645	up	1.83182e-10	5.51679e-09	--	--
GLYMA_16G010200	3173	1.75667	5.23	49.3333	162	1.62677	up	1.84381e-10	5.548e-09	At3g14110	--
GLYMA_14G090400	4729	13.12	29.66	496.333	1230.33	1.23078	up	1.88288e-10	5.66056e-09	At1g58440	K00511 squalene monooxygenase [EC:1.14.14.17] | (RefSeq) squalene monooxygenase SE1 isoform X1 (A)
GLYMA_13G032100	2469	54.3133	23.3433	2264	1083.67	-1.16087	down	1.89813e-10	5.69898e-09	At1g11050	K13416 brassinosteroid insensitive 1-associated receptor kinase 1 [EC:2.7.10.1 2.7.11.1] | (RefSeq) somatic embryogenesis receptor-like kinase-like protein precursor (A)
GLYMA_08G157800	4919	8.05667	17.61	306	754	1.19616	up	1.89899e-10	5.69898e-09	At2g31950	K03639 GTP 3',8-cyclase [EC:4.1.99.22] | (RefSeq) GTP 3',8-cyclase, mitochondrial isoform X1 (A)
GLYMA_03G200000	1528	12.42	26.1767	339.667	805.333	1.13825	up	1.92699e-10	5.77793e-09	At5g22250	K12581 CCR4-NOT transcription complex subunit 7/8 | (RefSeq) probable CCR4-associated factor 1 homolog 11 (A)
GLYMA_08G129300	1270	4.5	24.1833	68.3333	425.667	2.49388	up	1.93669e-10	5.80192e-09	At4g20390	--
GLYMA_16G175200	1610	1.7	5.07333	49	161.333	1.63192	up	1.94519e-10	5.82227e-09	At3g16520	K13263 isoflavone 7-O-glucosyltransferase [EC:2.4.1.170] | (RefSeq) UGT7; isoflavone 7-O-glucosyltransferase UGT7 (A)
GLYMA_09G096700	2780	13.4333	28.2067	668.333	1537.33	1.12296	up	1.97254e-10	5.89382e-09	At5g35160	K17086 transmembrane 9 superfamily member 2/4 | (RefSeq) transmembrane 9 superfamily member 11 (A)
GLYMA_15G115100	2946	25.73	51.4567	1071.67	2424.33	1.06424	up	1.98341e-10	5.92112e-09	At4g12560	--
GLYMA_07G181300	369	1.16667	9.21333	7.66667	66.3333	3.03345	up	2.00137e-10	5.9695e-09	--	--
GLYMA_14G205600	2374	6.83333	1.99333	289.667	96.6667	-1.70414	down	2.0463e-10	6.0982e-09	At4g11140	K13434 pathogenesis-related genes transcriptional activator PTI6 | (RefSeq) pathogenesis-related genes transcriptional activator PTI6 (A)
GLYMA_20G223200	5404	10.99	3.58	521.667	196.667	-1.53725	down	2.06978e-10	6.16277e-09	At1g08630	K01620 threonine aldolase [EC:4.1.2.48] | (RefSeq) probable low-specificity L-threonine aldolase 1 isoform X1 (A)
GLYMA_11G123400	898	0.976667	81.0833	15.6667	1513.67	6.43571	up	2.09061e-10	6.21939e-09	--	--
GLYMA_03G219000	2302	16.1767	46.2333	254	837.667	1.58865	up	2.09888e-10	6.23856e-09	At5g38070	K10661 E3 ubiquitin-protein ligase MARCH6 [EC:2.3.2.27] | (RefSeq) probable E3 ubiquitin ligase SUD1 isoform X2 (A)
GLYMA_09G264800	4662	8.38	17.3133	355.667	834.333	1.11448	up	2.11417e-10	6.27854e-09	--	--
GLYMA_20G102600	2661	40.5967	17.4667	1134	546.667	-1.1581	down	2.12173e-10	6.2955e-09	At3g19970	--
GLYMA_07G212400	1031	380.98	136.093	7023.33	2898	-1.41142	down	2.1245e-10	6.29825e-09	At4g34410	K09286 EREBP-like factor | (RefSeq) EBP; uncharacterized protein LOC100819416 (A)
GLYMA_08G083300	5303	2.64667	8.86333	215	776	1.79099	up	2.12956e-10	6.30779e-09	At5g46330	K13420 LRR receptor-like serine/threonine-protein kinase FLS2 [EC:2.7.11.1] | (RefSeq) LRR receptor-like serine/threonine-protein kinase FLS2 (A)
GLYMA_20G111600	2087	28.81	72.8933	505	1467.67	1.40903	up	2.24012e-10	6.62952e-09	--	--
GLYMA_08G043800	1491	14.9733	30.2833	399.667	913	1.08102	up	2.24633e-10	6.64213e-09	At1g14890	K01051 pectinesterase [EC:3.1.1.11] | (RefSeq) pectinesterase (A)
GLYMA_15G090500	3197	7.87333	2.29667	271.333	91	-1.69801	down	2.26089e-10	6.67941e-09	--	--
GLYMA_17G166200	3103	4.71333	1.74	261.667	105.667	-1.39061	down	2.29466e-10	6.77332e-09	At2g23200	K13430 serine/threonine-protein kinase PBS1 [EC:2.7.11.1] | (RefSeq) serine/threonine-protein kinase (A)
GLYMA_08G193500	6805	7.26667	2.57667	447.667	179	-1.42646	down	2.30618e-10	6.80143e-09	At3g13750	K12309 beta-galactosidase [EC:3.2.1.23] | (RefSeq) beta-galactosidase 17 (A)
GLYMA_07G108400	3216	2.05333	0.5	101	28	-1.9604	down	2.36955e-10	6.98231e-09	At2g19130	K13415 protein brassinosteroid insensitive 1 [EC:2.7.10.1 2.7.11.1] | (RefSeq) BRI1B; brassinosteroid receptor precursor (A)
GLYMA_05G015400	7293	42.03	13.7833	3689.67	1322.33	-1.5589	down	2.51775e-10	7.41261e-09	At1g68710	K01530 phospholipid-translocating ATPase [EC:7.6.2.1] | (RefSeq) putative phospholipid-transporting ATPase 9 isoform X1 (A)
GLYMA_13G347800	5575	47.18	20.39	2646	1296.67	-1.13952	down	2.59019e-10	7.61931e-09	At1g55020	K15718 linoleate 9S-lipoxygenase [EC:1.13.11.58] | (RefSeq) LOX7; lipoxygenase (A)
GLYMA_07G189300	1771	0.786667	4.05	19.6667	116.667	2.4456	up	2.65787e-10	7.81167e-09	At4g21440	K09422 transcription factor MYB, plant | (RefSeq) transcription factor MYB102 (A)
GLYMA_09G282600	1599	18.9633	5.40667	375.333	123	-1.73722	down	2.66997e-10	7.84049e-09	At5g08240	--
GLYMA_13G174900	4117	2.25667	0.56	147	40	-1.95769	down	2.68065e-10	7.86508e-09	At1g28440	K00924 kinase [EC:2.7.1.-] | (RefSeq) NARK; nodule autoregulation receptor kinase precursor (A)
GLYMA_13G035100	1130	9.08	33.55	183.667	800	1.96871	up	2.69396e-10	7.89736e-09	At1g21550	K13448 calcium-binding protein CML | (RefSeq) probable calcium-binding protein CML44 (A)
GLYMA_07G274000	2609	1.64333	4.73667	77	245.333	1.58543	up	2.71909e-10	7.96419e-09	--	--
GLYMA_13G091100	2815	71.19	137.95	2469.67	5439.33	1.02355	up	2.72362e-10	7.97062e-09	At4g30420	--
GLYMA_10G067900	3664	41.88	19.8467	1407.33	748.333	-1.01587	down	2.745e-10	8.0263e-09	At3g52870	--
GLYMA_17G026400	1164	11.14	24.4567	231.667	572.333	1.1969	up	2.89306e-10	8.44873e-09	At3g16570	--
GLYMA_20G143000	1536	0.813333	4.00333	22.3333	118	2.33691	up	2.89442e-10	8.44873e-09	At5g19260	--
GLYMA_06G298900	261	37.09	122.927	173.333	667.667	1.80402	up	2.98158e-10	8.69572e-09	At4g10270	--
GLYMA_20G218100	4615	5.23	11.76	226	565	1.22435	up	3.08517e-10	8.99015e-09	At1g32900	K13679 granule-bound starch synthase [EC:2.4.1.242] | (RefSeq) granule-bound starch synthase 1, chloroplastic/amyloplastic (A)
GLYMA_19G252600	6410	7.15333	14.65	472	1072.67	1.0916	up	3.10646e-10	9.04449e-09	At2g46270	K09060 plant G-box-binding factor | (RefSeq) common plant regulatory factor 1 isoform X2 (A)
GLYMA_11G043100	753	25.2	62.12	339.333	945	1.36291	up	3.18616e-10	9.26073e-09	At2g35270	--
GLYMA_19G233900	6905	182.363	56.0467	10252.7	3487	-1.64839	down	3.19174e-10	9.26907e-09	At1g09090	K13447 respiratory burst oxidase [EC:1.6.3.- 1.11.1.-] | (RefSeq) respiratory burst oxidase homolog protein B (A)
GLYMA_07G043500	1060	0.69	5.22667	13	112.333	2.98978	up	3.20029e-10	9.286e-09	At1g72430	--
GLYMA_08G053500	1334	260.957	543.517	6226	14780.3	1.12512	up	3.21107e-10	9.30936e-09	At1g73630	K13448 calcium-binding protein CML | (RefSeq) calcium-binding allergen Ole e 8 (A)
GLYMA_06G229400	3966	1.8	5.06333	63.6667	200.333	1.55632	up	3.25169e-10	9.41916e-09	At1g28200	--
GLYMA_08G058900	1451	23.6033	71.9733	512.333	1807.33	1.67932	up	3.29262e-10	9.52963e-09	At1g61340	--
GLYMA_06G060000	1625	48.8933	23.4133	1421	762	-1.00027	down	3.35656e-10	9.69825e-09	At5g10750	--
GLYMA_16G135000	5350	11.8567	4.85667	606.667	284	-1.21377	down	3.3905e-10	9.78804e-09	At3g50910	--
GLYMA_03G122500	5078	3.76667	1	140	40.3333	-1.87521	down	3.4574e-10	9.97273e-09	At1g68570	K14638 solute carrier family 15 (peptide/histidine transporter), member 3/4 | (RefSeq) protein NRT1/ PTR FAMILY 3.1 (A)
GLYMA_02G290000	2722	1.87	5.65	61	203	1.64541	up	3.48516e-10	1.00443e-08	At5g36110	K20667 beta-amyrin 28-monooxygenase [EC:1.14.14.126] | (RefSeq) beta-amyrin 28-monooxygenase (A)
GLYMA_03G233800	1399	0.303333	2.47667	6.33333	58.3333	3.08846	up	3.62575e-10	1.04407e-08	At1g56250	--
GLYMA_06G010200	1238	5.79667	13.7633	128.333	343.667	1.31306	up	3.69828e-10	1.06406e-08	At3g62420	--
GLYMA_11G129700	2852	33.16	7.40667	1097.33	291.667	-2.07817	down	3.77605e-10	1.08501e-08	At2g44450	K01188 beta-glucosidase [EC:3.2.1.21] | (RefSeq) cyanogenic beta-glucosidase (A)
GLYMA_04G017200	5096	15.16	6.88	533.333	273	-1.07381	down	3.78268e-10	1.0856e-08	At1g76360	K13430 serine/threonine-protein kinase PBS1 [EC:2.7.11.1] | (RefSeq) serine/threonine-protein kinase (A)
GLYMA_06G175100	2316	21.64	9.83333	895.667	452.333	-1.08229	down	3.79181e-10	1.0873e-08	At2g31880	K13415 protein brassinosteroid insensitive 1 [EC:2.7.10.1 2.7.11.1] | (RefSeq) BRI1B; brassinosteroid receptor precursor (A)
GLYMA_19G090800	1521	12.87	3.59	350.333	105.667	-1.80189	down	3.80813e-10	1.09107e-08	At3g01900	K20665 jasmonoyl-L-amino acid 12-hydroxylase [EC:1.14.14.48] | (RefSeq) cytochrome P450 94B3 (A)
GLYMA_03G016400	1094	30.1867	11.22	590.333	251.333	-1.35373	down	3.82168e-10	1.09403e-08	--	--
GLYMA_18G238600	1914	0.776667	4.40333	12.6667	82.3333	2.57412	up	3.8336e-10	1.09652e-08	At5g41570	K13424 WRKY transcription factor 33 | (RefSeq) WRKY62; WRKY transcription factor 62 (A)
GLYMA_03G132700	3638	24.9933	5.73333	619	152	-2.08464	down	3.92095e-10	1.12057e-08	At3g57270	K19893 glucan endo-1,3-beta-glucosidase 5/6 [EC:3.2.1.39] | (RefSeq) glucan endo-1,3-beta-glucosidase 5 (A)
GLYMA_18G153800	1550	2.22667	8.05	47	185.333	1.90164	up	4.04192e-10	1.15418e-08	At5g65660	--
GLYMA_20G091300	955	150	416.313	2123	6846.67	1.55172	up	4.05676e-10	1.15745e-08	At3g05890	--
GLYMA_09G119900	694	12.59	38.0833	156	536.333	1.65813	up	4.14777e-10	1.18243e-08	--	--
GLYMA_09G038800	2935	1.32333	8.98667	27	215.333	2.84279	up	4.174e-10	1.18891e-08	At5g49350	--
GLYMA_08G003200	5197	5.73333	1.95667	339.333	130.667	-1.48418	down	4.18553e-10	1.1912e-08	At3g05270	--
GLYMA_01G161200	2077	21.6667	42.42	462.333	1021.33	1.03383	up	4.21313e-10	1.19806e-08	At4g35750	K24997 ganglioside-induced differentiation-associated protein 2 | (RefSeq) protein GDAP2 homolog isoform X2 (A)
GLYMA_20G215500	2607	10.35	28.3767	481.333	1513.33	1.52192	up	4.26929e-10	1.21302e-08	At3g02650_1	--
GLYMA_14G160100	2860	77.96	29.2367	1805.67	779	-1.3404	down	4.45239e-10	1.26399e-08	At5g53190	K15382 solute carrier family 50 (sugar transporter) | (RefSeq) SWEET38; bidirectional sugar transporter SWEET3 (A)
GLYMA_13G035900	4599	2.98	8.28	143.667	437	1.52113	up	4.54737e-10	1.28988e-08	At1g21270	K13436 pto-interacting protein 1 [EC:2.7.11.1] | (RefSeq) pto-interacting protein 1-like (A)
GLYMA_08G173100	2530	9.86333	20.4133	446.667	1027.67	1.10873	up	4.55499e-10	1.29097e-08	At1g79060	--
GLYMA_12G217500	744	65.3967	20.3567	869.333	313	-1.60708	down	4.60946e-10	1.30438e-08	At4g27280	K24345 calcium-binding protein KIC and related proteins | (RefSeq) calcium-binding EF-hand family protein (A)
GLYMA_08G212900	2271	0.98	3.25333	32	120.333	1.80096	up	4.60994e-10	1.30438e-08	At3g15850	K20416 palmitoyl-[glycerolipid] 7-desaturase [EC:1.14.19.42] | (RefSeq) FAD5.2; delta-7 desaturase (A)
GLYMA_20G210900	2985	2.51667	7.98	102.333	360.667	1.71659	up	4.77044e-10	1.34868e-08	At2g26640	K15397 3-ketoacyl-CoA synthase [EC:2.3.1.199] | (RefSeq) 3-ketoacyl-CoA synthase 11 (A)
GLYMA_14G039800	737	5.68	24.23	59.6667	300.333	2.17577	up	4.98612e-10	1.40849e-08	--	--
GLYMA_06G061900	13053	4.42667	12.2367	122	380.333	1.52614	up	5.04293e-10	1.42336e-08	At1g80840	K13424 WRKY transcription factor 33 | (RefSeq) WRKY62; WRKY transcription factor 62 (A)
GLYMA_09G040600	2481	256.08	697.377	4288.33	13558.7	1.51935	up	5.09154e-10	1.43589e-08	--	--
GLYMA_15G019200	10637	20.38	8.08667	2411.67	1066	-1.27323	down	5.10335e-10	1.43803e-08	At1g59870	K05681 ATP-binding cassette, subfamily G (WHITE), member 2 | (RefSeq) ABC transporter G family member 21 (A)
novel.155	2674	3.20667	8.03667	130.667	371.333	1.39543	up	5.1342e-10	1.44553e-08	At4g34860	--
GLYMA_08G094900	4484	4.35	8.66333	334	737.333	1.04956	up	5.29563e-10	1.48976e-08	At1g70750	--
GLYMA_04G063200	1245	156.903	353.85	3496	9027.33	1.24206	up	5.33287e-10	1.499e-08	At2g25250	--
GLYMA_07G223200	7992	0.803333	0.0766667	94.6667	10.3333	-3.34004	down	5.36466e-10	1.50669e-08	At4g19690	K14709 solute carrier family 39 (zinc transporter), member 1/2/3 | (RefSeq) IRT; probable zinc transporter 10-like precursor (A)
GLYMA_05G120500	1909	0.4	2.53	10.3333	76	2.7523	up	5.4538e-10	1.53047e-08	At5g64530	--
GLYMA_16G196200	1675	63.2367	25.41	1766.67	810	-1.24492	down	5.54934e-10	1.556e-08	At5g62020	K09419 heat shock transcription factor, other eukaryote | (RefSeq) HSF-32; heat stress transcription factor 32 (A)
GLYMA_14G145700	2399	4.10667	1.09	123.333	36	-1.86664	down	5.71205e-10	1.60031e-08	At5g25830	--
GLYMA_03G173300	888	20.3567	58.5933	324	1078.33	1.60011	up	5.74658e-10	1.60867e-08	At2g37430	--
GLYMA_10G147800	2720	6.20333	14.1533	114	291	1.25132	up	5.80682e-10	1.6242e-08	At4g02080	K07953 GTP-binding protein SAR1 [EC:3.6.5.-] | (RefSeq) GTP-binding protein SAR1A (A)
GLYMA_18G241800	3829	5.68667	14.0167	176	477.667	1.35439	up	5.82506e-10	1.62797e-08	At5g16480	K18045 tyrosine-protein phosphatase SIW14 [EC:3.1.3.48] | (RefSeq) tyrosine-protein phosphatase DSP5 (A)
GLYMA_13G254800	5976	10.5433	4.88667	415	214	-1.05186	down	6.02594e-10	1.68273e-08	At2g04305	--
GLYMA_05G150200	5796	3.13333	1.13333	223.333	89	-1.41591	down	6.04363e-10	1.68629e-08	At4g14190	--
GLYMA_09G257100	3776	2.32667	6.83	98	332.333	1.62884	up	6.04902e-10	1.68642e-08	At5g41350	K19043 E3 ubiquitin-protein ligase RHF [EC:2.3.2.27] | (RefSeq) E3 ubiquitin-protein ligase RHF1A (A)
GLYMA_06G170700	4311	48.0933	20.52	2054.67	1002.33	-1.15691	down	6.0633e-10	1.68902e-08	At3g48530	--
GLYMA_06G235500	13587	3.48667	1.43	532	246	-1.21999	down	6.14535e-10	1.71048e-08	At5g53970	K00815 tyrosine aminotransferase [EC:2.6.1.5] | (RefSeq) tyrosine aminotransferase (A)
GLYMA_02G124300	1864	0.74	3.64667	15.6667	88	2.3731	up	6.28709e-10	1.74851e-08	At5g10280	K09422 transcription factor MYB, plant | (RefSeq) transcription factor MYB92 (A)
GLYMA_14G067200	2412	2.15333	8.86	69	316.333	2.08911	up	6.50163e-10	1.80523e-08	At3g11430	K13508 glycerol-3-phosphate acyltransferase [EC:2.3.1.15 2.3.1.198] | (RefSeq) glycerol-3-phosphate acyltransferase 5 (A)
GLYMA_20G121200	6950	10.01	28.6333	299.333	995	1.59079	up	7.03218e-10	1.95096e-08	At3g02600	K18693 diacylglycerol diphosphate phosphatase / phosphatidate phosphatase [EC:3.1.3.81 3.1.3.4] | (RefSeq) uncharacterized protein LOC100784929 (A)
GLYMA_18G284100	3904	3.37	1.01333	230.333	77	-1.67114	down	7.12609e-10	1.97541e-08	At3g28040	K13416 brassinosteroid insensitive 1-associated receptor kinase 1 [EC:2.7.10.1 2.7.11.1] | (RefSeq) BRASSINOSTEROID INSENSITIVE 1-associated receptor kinase 1 isoform X1 (A)
GLYMA_04G095700	4070	6.95333	2.71667	240.333	105.667	-1.28994	down	7.17249e-10	1.98666e-08	At1g09700	--
GLYMA_20G189200	4019	5.27333	10.4967	379.667	835.667	1.04929	up	7.19627e-10	1.99163e-08	At5g04550	K01179 endoglucanase [EC:3.2.1.4] | (RefSeq) LOW QUALITY PROTEIN: endoglucanase 24 (A)
GLYMA_17G121800	2123	2.93667	7.92	111.333	337.333	1.49008	up	7.36645e-10	2.03708e-08	--	--
GLYMA_14G209400	7760	3.6	9.59	302.333	874.333	1.4616	up	7.43639e-10	2.05309e-08	At1g65840	K17839 polyamine oxidase [EC:1.5.3.17 1.5.3.-] | (RefSeq) polyamine oxidase 5 isoform X1 (A)
GLYMA_10G204100	3461	7.66	2.99333	278.333	123.667	-1.2844	down	7.59182e-10	2.09431e-08	At1g25530	K24917 amino acid permease | (RefSeq) amino acid permease 6 (A)
GLYMA_13G282200	1069	7.48333	19.9067	143	436.667	1.48176	up	7.72725e-10	2.12937e-08	At4g10270	--
GLYMA_11G093300	3219	2.98667	0.56	93.6667	19	-2.37614	down	7.73136e-10	2.12937e-08	At1g51410	--
GLYMA_04G007300	2018	26.58	11.1633	960.333	456.333	-1.18449	down	7.99665e-10	2.20066e-08	At2g16570	K00764 amidophosphoribosyltransferase [EC:2.4.2.14] | (RefSeq) PUR1; amidophosphoribosyltransferase, chloroplastic (A)
GLYMA_16G063600	4910	2.32667	0.786667	204.667	79	-1.48701	down	8.17405e-10	2.24767e-08	At4g12560	--
GLYMA_14G066400	2271	21.14	8.99667	642	308.333	-1.16314	down	8.35434e-10	2.29539e-08	At3g11410	K14497 protein phosphatase 2C [EC:3.1.3.16] | (RefSeq) protein phosphatase 2C 37 (A)
GLYMA_15G142400	2071	35.7933	11.4167	883.333	322.333	-1.57632	down	8.63389e-10	2.37029e-08	At4g16260	K19892 glucan endo-1,3-beta-glucosidase 4 [EC:3.2.1.39] | (RefSeq) glucan endo-1,3-beta-glucosidase 4 (A)
GLYMA_13G065300	955	30.0133	11.4667	512.333	215.333	-1.33368	down	8.70971e-10	2.38812e-08	--	--
GLYMA_04G061200	3042	9.17333	19.1133	314.333	745	1.12747	up	8.7128e-10	2.38812e-08	At4g31800_2	--
GLYMA_11G123900	1593	7.12333	16.3767	203	527.667	1.27113	up	8.73005e-10	2.39093e-08	At1g49470	--
GLYMA_02G127300	2921	0.523333	3.34333	12.3333	89	2.7341	up	8.92769e-10	2.4431e-08	At1g68850	K00430 peroxidase [EC:1.11.1.7] | (RefSeq) peroxidase 11 isoform X1 (A)
GLYMA_02G216600	21132	22.4433	49.07	457	1136.33	1.19439	up	9.29371e-10	2.54122e-08	At4g37940	K09264 MADS-box transcription factor, plant | (RefSeq) MADS-box transcription factor 23 isoform X5 (A)
GLYMA_13G066100	2339	9.39	3.89333	393	185.333	-1.19938	down	9.33355e-10	2.55007e-08	At5g40010	K08900 mitochondrial chaperone BCS1 | (RefSeq) AAA-ATPase ASD, mitochondrial isoform X1 (A)
GLYMA_04G030900	5334	11.88	30.3867	1055	3127	1.43089	up	9.41063e-10	2.56908e-08	At1g19530	K23050 phenylcoumaran benzylic ether reductase [EC:1.3.1.-] | (RefSeq) phenylcoumaran benzylic ether reductase Betv6 (A)
GLYMA_09G122600	4202	7.47333	2.00667	218.667	67.3333	-1.81955	down	9.45619e-10	2.57946e-08	At1g16310	--
GLYMA_17G034700	2296	6.79333	1.55	199	49.3333	-2.081	down	9.49773e-10	2.58872e-08	At3g53480	--
GLYMA_10G231600	5462	1.12	0.0333333	48.6667	2	-4.74534	down	9.67051e-10	2.63371e-08	At5g23980	K00521 ferric-chelate reductase [EC:1.16.1.7] | (RefSeq) ferric reduction oxidase 4 isoform X1 (A)
GLYMA_03G221400	6454	0.0133333	1.13	0.666667	69.6667	6.62115	up	9.74431e-10	2.65169e-08	At2g47240	K01897 long-chain acyl-CoA synthetase [EC:6.2.1.3] | (RefSeq) long chain acyl-CoA synthetase 1 (A)
GLYMA_03G231700	1959	14.6533	37.2367	313.667	916	1.4211	up	1.00888e-09	2.74202e-08	At3g62550	--
GLYMA_07G188400	1780	16.12	6.95	513	248.667	-1.15158	down	1.00923e-09	2.74202e-08	At4g21350	--
GLYMA_02G146000	4084	2.31667	5.37	169.333	431.667	1.26765	up	1.0226e-09	2.77613e-08	At3g63220	--
GLYMA_01G144400	2431	4.88667	9.45667	212.667	459.667	1.01333	up	1.04108e-09	2.82183e-08	At2g45430	--
GLYMA_01G047400	3743	6.99667	16.4567	171.333	443.333	1.29115	up	1.06055e-09	2.87003e-08	At5g22260	--
GLYMA_03G181700	3936	6.80333	1.71333	294.667	81	-1.94822	down	1.0626e-09	2.8733e-08	At2g37040	K10775 phenylalanine ammonia-lyase [EC:4.3.1.24] | (RefSeq) PAL1.2; phenylalanine ammonia-lyase 1 (A)
GLYMA_02G172200	2267	21.4133	8.84	868	404.667	-1.21329	down	1.10748e-09	2.9923e-08	At5g06740	K13416 brassinosteroid insensitive 1-associated receptor kinase 1 [EC:2.7.10.1 2.7.11.1] | (RefSeq) BRASSINOSTEROID INSENSITIVE 1-associated receptor kinase 1 (A)
novel.320	823	3.94333	0.453333	58	8	-2.99093	down	1.10841e-09	2.99243e-08	--	--
GLYMA_11G194600	2027	426.813	202.177	10828.3	5842	-1.00898	down	1.11924e-09	3.0193e-08	At5g60800	--
novel.88	771	0.266667	3.87333	3.66667	59.3333	3.92562	up	1.13396e-09	3.05659e-08	--	--
GLYMA_11G222300	4540	5.65333	1.99333	223.333	88.6667	-1.44175	down	1.1374e-09	3.06344e-08	At5g06060	K08081 tropinone reductase I [EC:1.1.1.206] | (RefSeq) tropinone reductase homolog At5g06060 (A)
GLYMA_09G134700	5107	3.01	6.92	155	394.333	1.25799	up	1.14021e-09	3.06859e-08	At5g52430	--
GLYMA_10G221000	13403	2.03	4.22333	342	798.333	1.11871	up	1.14331e-09	3.07452e-08	At1g71710	K20279 synaptojanin [EC:3.1.3.36] | (RefSeq) type IV inositol polyphosphate 5-phosphatase 3 (A)
GLYMA_02G220500	7188	7.01	15.31	380.333	910	1.17965	up	1.15842e-09	3.11269e-08	At4g27870	--
GLYMA_04G237400	7866	9.78667	4.59	597.333	312	-1.03166	down	1.21376e-09	3.25883e-08	At5g53130	K05391 cyclic nucleotide gated channel, plant | (RefSeq) cyclic nucleotide-gated ion channel 1 (A)
GLYMA_09G218100	8526	1.74667	0.356667	91.6667	21.3333	-2.21476	down	1.30327e-09	3.49366e-08	At4g19380	K17756 long-chain-alcohol oxidase [EC:1.1.3.20] | (RefSeq) long-chain-alcohol oxidase FAO4A (A)
GLYMA_13G155400	3757	0.686667	2.45333	33	131.667	1.90354	up	1.31328e-09	3.51774e-08	At2g25180	K14491 two-component response regulator ARR-B family | (RefSeq) two-component response regulator ARR12 isoform X2 (A)
GLYMA_19G215900	2849	15.1067	41.6867	397	1271.33	1.53844	up	1.32103e-09	3.53572e-08	At5g38070	K08737 DNA mismatch repair protein MSH6 | (RefSeq) DNA mismatch repair protein MSH6 (A)
GLYMA_16G080400	651	0.753333	7.07667	7.33333	80	3.30384	up	1.32612e-09	3.54658e-08	At1g29000	--
GLYMA_U030300	3002	0.0533333	0.86	2.66667	46.3333	4.01105	up	1.32976e-09	3.55352e-08	--	--
GLYMA_10G017500	1196	8.05667	21.9167	172.333	540.333	1.51629	up	1.34831e-09	3.60028e-08	At1g02810_2	--
GLYMA_15G182000	15437	0.213333	1.17333	16	94.6667	2.50255	up	1.40487e-09	3.74836e-08	At1g19230	K13447 respiratory burst oxidase [EC:1.6.3.- 1.11.1.-] | (RefSeq) respiratory burst oxidase homolog protein E isoform X1 (A)
GLYMA_17G023000	2630	119.4	238.203	2746	6249.33	1.06409	up	1.41242e-09	3.76558e-08	At3g06390	--
GLYMA_16G204700	2281	5.90333	2.16333	236	95.6667	-1.39334	down	1.43743e-09	3.82926e-08	At1g12380	--
GLYMA_04G103400	3850	30.0167	13.77	1479.33	771	-1.05466	down	1.49796e-09	3.9874e-08	At1g78120	K09527 DnaJ homolog subfamily C member 7 | (RefSeq) TPR repeat-containing thioredoxin TTL1 (A)
GLYMA_01G202200	2039	1.24667	4.58333	45.3333	190	1.95233	up	1.51644e-09	4.03344e-08	At2g45760	--
GLYMA_16G080100	6873	5.12333	14.2133	214.333	682.333	1.53977	up	1.52314e-09	4.04812e-08	At4g02600	K08472 mlo protein | (RefSeq) MLO-like protein 1 (A)
GLYMA_04G013500	1721	21.37	41.7067	503	1088.33	1.0217	up	1.53337e-09	4.07214e-08	At1g49320	--
GLYMA_01G005400	5116	1.65	4.40667	69.3333	205.667	1.47209	up	1.54384e-09	4.09676e-08	At5g56630	K00850 6-phosphofructokinase 1 [EC:2.7.1.11] | (RefSeq) ATP-dependent 6-phosphofructokinase 3 isoform X1 (A)
GLYMA_09G107100	1470	32.0733	72.1267	434	1116.33	1.23898	up	1.58936e-09	4.21426e-08	At5g05600	K24028 salicylic acid 3-hydroxylase [EC:1.14.11.-] | (RefSeq) protein DMR6-LIKE OXYGENASE 2 isoform X1 (A)
GLYMA_03G171500	5065	1.28667	3.66	72.3333	225.333	1.55914	up	1.60665e-09	4.25682e-08	At3g53720	--
GLYMA_12G184500	9649	16.95	7.97	701.667	370.333	-1.02651	down	1.67562e-09	4.43612e-08	At1g08320_1	K14431 transcription factor TGA | (RefSeq) TGA17; transcription factor TGA9 isoform X2 (A)
GLYMA_04G251400	1786	4.94	11.7767	157.667	418.667	1.30843	up	1.70188e-09	4.50213e-08	At1g21910	K09286 EREBP-like factor | (RefSeq) AP2-1; dehydration-responsive element-binding protein 3-like (A)
GLYMA_16G080000	937	0.24	3.13667	4	61.6667	3.80348	up	1.71178e-09	4.52483e-08	--	--
GLYMA_05G193200	5627	10.4433	23.3	726.667	1768.67	1.21023	up	1.72183e-09	4.54726e-08	At5g64030	K15449 tRNA wybutosine-synthesizing protein 1 [EC:4.1.3.44] | (RefSeq) probable methyltransferase PMT28 (A)
GLYMA_11G109100	2142	9.84333	21.9367	229.333	583.333	1.22537	up	1.72293e-09	4.54726e-08	At1g32700	--
GLYMA_10G148700	3342	12.16	4.21	468.667	176.667	-1.48534	down	1.72894e-09	4.55958e-08	At5g57580	--
GLYMA_18G080000	1574	6.47333	14.9967	182	481.667	1.28322	up	1.73679e-09	4.57676e-08	At1g55920	K00640 serine O-acetyltransferase [EC:2.3.1.30] | (RefSeq) SAT1; serine acetyltransferase 1, chloroplastic (A)
GLYMA_13G221800	6010	7.02667	14.3233	265.667	606.667	1.09182	up	1.73971e-09	4.58092e-08	At1g30300	--
GLYMA_13G312700	2160	2.12333	5.61	82	237.667	1.45402	up	1.77752e-09	4.67687e-08	At2g35930	--
GLYMA_01G011500	3842	0.686667	3.2	24	119.333	2.2543	up	1.81366e-09	4.76829e-08	At4g16070	K13806 sn1-specific diacylglycerol lipase [EC:3.1.1.116] | (RefSeq) uncharacterized protein LOC100810158 (A)
GLYMA_09G182400	5368	15.6567	5.53667	588.667	238.667	-1.43133	down	1.84732e-09	4.85304e-08	At1g73800	--
GLYMA_01G220800	2854	14.0533	5.63667	508	231	-1.25085	down	1.92193e-09	5.04516e-08	At5g52430	--
GLYMA_05G135000	12773	8.66	3.15333	1289.67	518	-1.39727	down	1.96358e-09	5.15056e-08	At1g65780	K10706 senataxin [EC:3.6.4.-] | (RefSeq) uncharacterized protein LOC100794516 (A)
GLYMA_03G007400	1132	1.51667	6.99	23.6667	124.667	2.26997	up	1.98766e-09	5.20972e-08	--	--
GLYMA_09G252300	7269	10.2933	19.8333	529.667	1138.33	1.00445	up	2.00053e-09	5.23944e-08	At5g16520	--
GLYMA_17G043900	1162	4.70333	11.6167	97.6667	274.333	1.37216	up	2.01604e-09	5.276e-08	At3g43430	K16281 RING-H2 zinc finger protein RHA1 | (RefSeq) RING/U-box superfamily protein (A)
GLYMA_13G049700	3789	28.3867	68.07	1039.67	2829	1.3264	up	2.12208e-09	5.54501e-08	At5g38710	K00318 proline dehydrogenase [EC:1.5.5.2] | (RefSeq) proline dehydrogenase 2, mitochondrial (A)
GLYMA_11G160000	2649	15.8833	34.5333	345.667	826.333	1.172	up	2.13125e-09	5.56471e-08	At2g40610	K20628 expansin | (RefSeq) expansin-A8 (A)
GLYMA_05G119200	853	41.4233	18.25	631.667	314.333	-1.11694	down	2.13643e-09	5.57397e-08	Hs8922629	K03686 molecular chaperone DnaJ | (RefSeq) chaperone protein DnaJ (A)
GLYMA_12G009600	4258	4.53667	1.26	122	37.6667	-1.78974	down	2.18069e-09	5.68511e-08	At3g63490	K02863 large subunit ribosomal protein L1 | (RefSeq) 50S ribosomal protein L1, chloroplastic (A)
GLYMA_15G099500	5196	54.7267	109.553	2079.67	4580.33	1.05592	up	2.2121e-09	5.76261e-08	At5g18840	K03444 MFS transporter, SP family, ERD6-like sugar transporter | (RefSeq) sugar transporter ERD6-like 16 (A)
GLYMA_07G055300	1835	36.34	15.5167	1194	555	-1.1784	down	2.26051e-09	5.88421e-08	At1g01300	K22683 aspartyl protease family protein [EC:3.4.23.-] | (RefSeq) aspartyl protease family protein 2 (A)
GLYMA_13G056200	4026	10.61	4.25333	764.667	335.333	-1.26745	down	2.27313e-09	5.91255e-08	At3g02130	K13415 protein brassinosteroid insensitive 1 [EC:2.7.10.1 2.7.11.1] | (RefSeq) BRI1B; brassinosteroid receptor precursor (A)
GLYMA_11G051200	1710	0.15	1.62	4.66667	56.6667	3.48434	up	2.32859e-09	6.0522e-08	At5g43120	--
GLYMA_17G039300	13770	15.22	6	1739	772.333	-1.27417	down	2.42215e-09	6.28581e-08	At3g53480	K05681 ATP-binding cassette, subfamily G (WHITE), member 2 | (RefSeq) ABC transporter G family member 21 (A)
GLYMA_02G056400	3990	1.71667	7.74	37	193.333	2.24826	up	2.4533e-09	6.36182e-08	At2g18360	K13699 abhydrolase domain-containing protein 5 [EC:2.3.1.51] | (RefSeq) probable 1-acylglycerol-3-phosphate O-acyltransferase isoform X2 (A)
GLYMA_15G247700	732	3.20667	12.8967	42	198.667	2.0921	up	2.51551e-09	6.51325e-08	--	--
GLYMA_19G202300	710	3.15333	0.166667	40	2.33333	-4.20175	down	2.66829e-09	6.9036e-08	--	K20725 MAP kinase substrate 1 | (RefSeq) nuclear speckle RNA-binding protein B (A)
GLYMA_11G185000	7179	0.943333	4.59333	32.3333	185.667	2.36959	up	2.75659e-09	7.12665e-08	At4g33790	K13356 alcohol-forming fatty acyl-CoA reductase [EC:1.2.1.84] | (RefSeq) alcohol-forming fatty acyl-CoA reductase (A)
GLYMA_02G072400	553	89.7067	233.943	887	2677	1.45504	up	2.76351e-09	7.13914e-08	--	--
GLYMA_13G341700	3231	6.31333	12.87	250.333	578.333	1.09502	up	2.77883e-09	7.17329e-08	At2g42280	K12126 phytochrome-interacting factor 3 | (RefSeq) transcription factor PIF3 (A)
GLYMA_10G142700	1384	16.06	49.5367	355.667	1280.33	1.70699	up	2.79248e-09	7.20309e-08	At3g05890	--
GLYMA_18G246400	3191	30.77	14.2267	1541	810.667	-1.0456	down	2.84708e-09	7.33838e-08	At5g48380	K13415 protein brassinosteroid insensitive 1 [EC:2.7.10.1 2.7.11.1] | (RefSeq) BRI1B; brassinosteroid receptor precursor (A)
GLYMA_11G252700	5295	6.14	2.45667	278	125.333	-1.25438	down	2.88476e-09	7.42989e-08	At1g14780	--
GLYMA_12G030300	990	1.00333	5.86	17.6667	120	2.62433	up	3.05186e-09	7.84843e-08	At2g21100	K25075 pterocarpan synthase [EC:4.2.1.139] | (RefSeq) PTS4; pterocarpan synthase precursor (A)
GLYMA_11G147700	1984	10.1967	3.14667	271	90	-1.65646	down	3.11177e-09	7.99648e-08	At5g60520	--
GLYMA_16G122700	5458	1.13667	0.0333333	40.3333	1.33333	-5.01181	down	3.13385e-09	8.04717e-08	At2g17760	K22683 aspartyl protease family protein [EC:3.4.23.-] | (RefSeq) aspartyl protease family protein 2 (A)
GLYMA_09G258600	3146	7.92667	18.1367	347	911.333	1.26488	up	3.14462e-09	8.06875e-08	At2g45980	--
GLYMA_12G087400	7082	0.856667	3.44667	29	135.333	2.08656	up	3.1543e-09	8.0875e-08	At4g33790	K13356 alcohol-forming fatty acyl-CoA reductase [EC:1.2.1.84] | (RefSeq) alcohol-forming fatty acyl-CoA reductase (A)
GLYMA_11G230600	2788	2.46	0.643333	122.333	35.3333	-1.883	down	3.36534e-09	8.60278e-08	At3g55950	K13430 serine/threonine-protein kinase PBS1 [EC:2.7.11.1] | (RefSeq) probable serine/threonine-protein kinase PBL7 isoform X1 (A)
GLYMA_04G140100	3958	0.8	3.26667	31.6667	142.667	2.08599	up	3.5226e-09	8.99805e-08	At1g20780	K08332 vacuolar protein 8 | (RefSeq) U-box domain-containing protein 44 (A)
GLYMA_19G202900	3124	8.31	17.36	201.333	474	1.12995	up	3.55269e-09	9.06811e-08	At5g06570	K14493 gibberellin receptor GID1 [EC:3.-.-.-] | (RefSeq) gibberellin receptor GID1B (A)
GLYMA_06G103300	1731	0.7	3.81667	17.6667	106.667	2.49606	up	3.59606e-09	9.17198e-08	At1g34670	K09422 transcription factor MYB, plant | (RefSeq) transcription factor MYB93 (A)
GLYMA_01G232500	5348	60.1333	28.0533	5067.67	2611.67	-1.0428	down	3.72432e-09	9.49202e-08	At5g16910	K20924 cellulose synthase-like protein [EC:2.4.1.-] | (RefSeq) cellulose synthase-like protein D2 (A)
GLYMA_20G220900	1062	28.0667	91.66	475.667	1790.33	1.77203	up	3.78635e-09	9.64292e-08	At3g05950	--
GLYMA_05G194100	6624	137.867	65.4133	3872.67	2060.33	-1.01337	down	3.88785e-09	9.89404e-08	At3g52430	K18875 enhanced disease susceptibility 1 protein | (RefSeq) uncharacterized protein LOC100778851 (A)
novel.323	1278	0.156667	1.83667	3.66667	46.6667	3.57703	up	3.89929e-09	9.91575e-08	At4g10990_1	--
GLYMA_08G192900	5708	1.11333	0.226667	98	22.6667	-2.22326	down	4.00405e-09	1.01746e-07	At5g17680	K13457 disease resistance protein RPM1 | (RefSeq) disease resistance protein RPM1 (A)
GLYMA_10G203700	6250	9.38667	2.71333	335.333	110.667	-1.7123	down	4.05796e-09	1.03039e-07	At2g16980	--
novel.175	8299	0	1.00333	0	38	7.58833	up	4.07132e-09	1.03302e-07	At2g07420	K24544 cytochrome P450 family 714 subfamily C | (RefSeq) cytochrome P450 714C2 (A)
GLYMA_19G009000	4503	16.9067	45.82	531.667	1622	1.50419	up	4.08376e-09	1.0354e-07	At5g14780	K00122 formate dehydrogenase [EC:1.17.1.9] | (RefSeq) formate dehydrogenase 1, mitochondrial (A)
GLYMA_08G030100	2081	11.2933	4.68	375	173	-1.2118	down	4.09216e-09	1.03676e-07	At4g26200	K01762 1-aminocyclopropane-1-carboxylate synthase [EC:4.4.1.14] | (RefSeq) 1-aminocyclopropane-1-carboxylate synthase 7 (A)
GLYMA_01G087500	1824	132.15	269.707	4314.67	10012.7	1.09514	up	4.10027e-09	1.03738e-07	At1g25560	K09287 RAV-like factor | (RefSeq) RAV1; AP2/ERF transcription factor family protein RAV1 (A)
GLYMA_09G251500	6565	4.44333	9.91	203.333	518	1.22703	up	4.11406e-09	1.04e-07	At1g11170	--
GLYMA_17G039900	853	1.94667	8.17	29.6667	144.667	2.14484	up	4.14195e-09	1.04624e-07	At4g24130	--
GLYMA_12G209600	4944	9.50667	19.1867	264.667	592	1.06854	up	4.14488e-09	1.04624e-07	At2g42570	K23877 xyloglucan O-acetyltransferase | (RefSeq) protein ALTERED XYLOGLUCAN 4 (A)
GLYMA_06G088600	7063	10.3867	24.76	458.667	1182.67	1.30129	up	4.18008e-09	1.05434e-07	At5g56630	K00850 6-phosphofructokinase 1 [EC:2.7.1.11] | (RefSeq) ATP-dependent 6-phosphofructokinase 6 (A)
GLYMA_04G242400	1396	17.4033	45.97	434.667	1301.33	1.46264	up	4.28862e-09	1.08092e-07	At1g31130	--
GLYMA_10G270000	5458	8.67333	17.0867	483.667	1078.67	1.04207	up	4.30007e-09	1.08301e-07	At1g15080	K18693 diacylglycerol diphosphate phosphatase / phosphatidate phosphatase [EC:3.1.3.81 3.1.3.4] | (RefSeq) uncharacterized protein LOC100805924 (A)
GLYMA_14G043000	1575	7.57333	3.09667	213.333	97.3333	-1.23072	down	4.33449e-09	1.09087e-07	At1g47890	--
GLYMA_18G275600	4423	6.96667	2.11333	551.333	193.333	-1.63795	down	4.34667e-09	1.09313e-07	At2g03890	--
GLYMA_08G307600	2686	16.3733	7.61667	786.333	406.333	-1.04568	down	4.59352e-09	1.15351e-07	At3g59080	K22683 aspartyl protease family protein [EC:3.4.23.-] | (RefSeq) aspartyl protease family protein 2 (A)
GLYMA_02G089400	415	18.7767	4.18667	127.667	33.3333	-2.07573	down	4.67011e-09	1.17189e-07	--	--
GLYMA_09G143800	3542	51.1067	24.3233	1495.67	805.667	-1.00444	down	4.68676e-09	1.1752e-07	At1g63120	--
GLYMA_02G010000	731	0.233333	3.89333	3	60.3333	4.1773	up	4.74629e-09	1.18925e-07	--	--
GLYMA_05G184500	3141	5.03	0.956667	88.3333	19	-2.33078	down	5.05084e-09	1.26186e-07	At5g26170	K13424 WRKY transcription factor 33 | (RefSeq) probable WRKY transcription factor 33 isoform X2 (A)
GLYMA_12G073400	207	7.9	27.6733	29.3333	115.667	1.87238	up	5.08836e-09	1.2703e-07	--	--
GLYMA_05G010500	949	42.0867	102.11	714	1998	1.35136	up	5.11839e-09	1.27687e-07	At1g52720	--
GLYMA_07G216800	1067	8.26	19.2733	157.667	416	1.28657	up	5.2058e-09	1.29773e-07	--	--
GLYMA_11G171400	4877	39.94	14.0067	1601.67	641.333	-1.43969	down	5.31965e-09	1.32514e-07	At3g47340	K01953 asparagine synthase (glutamine-hydrolysing) [EC:6.3.5.4] | (RefSeq) asparagine synthetase [glutamine-hydrolyzing] 2 (A)
GLYMA_06G045100	3091	11.99	5.02	662.667	315.667	-1.18415	down	5.46661e-09	1.36076e-07	At5g67360	--
GLYMA_09G240100	5751	1.13	3.38667	38.6667	127.667	1.63462	up	5.61017e-09	1.39547e-07	At5g39890	K23953 plant cysteine oxidase [EC:1.13.11.-] | (RefSeq) plant cysteine oxidase 2 isoform X1 (A)
GLYMA_01G185800	2342	186.997	72.9767	5966	2691.33	-1.28336	down	5.62675e-09	1.39858e-07	At4g36990	K09419 heat shock transcription factor, other eukaryote | (RefSeq) HSF-01; heat stress transcription factor 1 (A)
GLYMA_10G081900	1302	46.8667	112.117	1089.33	3000	1.32729	up	5.63448e-09	1.39948e-07	At2g35930	--
GLYMA_16G029000	5407	15.8167	30.86	976.333	2174	1.03416	up	5.65834e-09	1.40439e-07	At2g46270	K09060 plant G-box-binding factor | (RefSeq) GBF2; G-box binding factor (A)
GLYMA_16G040500	2463	31.61	65.8467	908.667	2161.67	1.12943	up	5.75166e-09	1.42651e-07	At1g55340	--
GLYMA_11G078000	5250	0.213333	1.62667	7.66667	63	2.97484	up	5.75931e-09	1.42737e-07	At5g53760	K08472 mlo protein | (RefSeq) MLO-like protein 4 (A)
GLYMA_13G237500	2246	3.77667	8.6	138.333	359	1.25669	up	5.88036e-09	1.45526e-07	At1g28310	--
GLYMA_06G168300	2472	13.3267	5.09333	361.667	153.667	-1.32752	down	5.94908e-09	1.4712e-07	At5g63530	K07213 copper chaperone | (RefSeq) copper chaperone homolog CCH (A)
GLYMA_20G175100	5231	3.27667	7.38667	108.333	274.333	1.23852	up	6.0575e-09	1.49693e-07	At4g09570	K13412 calcium-dependent protein kinase [EC:2.7.11.1] | (RefSeq) CDPK-BETA; calmodulin-like domain protein kinase isoenzyme beta (A)
GLYMA_09G117400	4580	13.0567	5.95	487.667	250	-1.07137	down	6.14038e-09	1.51631e-07	At1g75130	K15639 PHYB activation tagged suppressor 1 [EC:1.14.-.-] | (RefSeq) cytochrome P450 734A1 (A)
GLYMA_06G244800	3394	5.22333	2.12333	317.333	140.667	-1.25275	down	6.14645e-09	1.51672e-07	At4g21700	--
GLYMA_15G247600	14899	4.73	10.17	786	1912.33	1.1721	up	6.50129e-09	1.60312e-07	At4g27190	K13459 disease resistance protein RPS2 | (RefSeq) probable disease resistance protein At4g27220 (A)
GLYMA_17G233700	1246	22.3067	58.3033	496.667	1507.33	1.4597	up	6.51713e-09	1.60587e-07	At1g58420	--
GLYMA_04G097800	246	4.99	20.43	22	103.667	2.10929	up	6.57306e-09	1.61848e-07	--	--
GLYMA_07G130800	4839	6.67667	13.26	365.333	814.667	1.05298	up	6.59483e-09	1.62267e-07	At5g60010	K13447 respiratory burst oxidase [EC:1.6.3.- 1.11.1.-] | (RefSeq) respiratory burst oxidase homolog protein B (A)
GLYMA_08G117300	4155	2.24	5.77333	84.3333	245.333	1.42891	up	6.72866e-09	1.65441e-07	At2g34200	--
GLYMA_17G099100	3003	0.443333	2.04333	23.6667	119.333	2.25784	up	6.74234e-09	1.65658e-07	At3g47620	K16221 transcription factor TCP21 (protein CCA1 HIKING EXPEDITION) | (RefSeq) transcription factor TCP7 (A)
GLYMA_05G199400	3716	2.57667	5.87	115.667	294.333	1.24618	up	6.77784e-09	1.66318e-07	At5g51050	K14684 solute carrier family 25 (mitochondrial phosphate transporter), member 23/24/25/41 | (RefSeq) calcium-dependent mitochondrial ATP-magnesium/phosphate carrier protein 3 (A)
GLYMA_04G042400	2801	31.6067	72.2867	1584	4018.67	1.24797	up	6.77893e-09	1.66318e-07	At5g24080	K13430 serine/threonine-protein kinase PBS1 [EC:2.7.11.1] | (RefSeq) probable serine/threonine-protein kinase PBL7 (A)
GLYMA_03G159000	5104	5.50333	1.47	312.667	92.3333	-1.85071	down	6.78734e-09	1.66404e-07	At2g30550	K16818 phospholipase A1 [EC:3.1.1.32] | (RefSeq) phospholipase A(1) DAD1, chloroplastic (A)
GLYMA_01G196600	1903	8.47	17.7767	216	516.333	1.13915	up	6.80176e-09	1.66638e-07	At4g37790	K09338 homeobox-leucine zipper protein | (RefSeq) homeobox-leucine zipper protein HAT22 (A)
GLYMA_08G129600	3676	5.63333	12.8467	228.333	570	1.23822	up	6.86103e-09	1.67849e-07	At4g21120	K03294 basic amino acid/polyamine antiporter, APA family | (RefSeq) cationic amino acid transporter 1 (A)
GLYMA_08G161500	12959	6.39	13.2967	639.333	1456.33	1.11014	up	6.89136e-09	1.68471e-07	At2g31900	K10357 myosin V | (RefSeq) myosin-12 (A)
GLYMA_11G250600	2109	6.10667	14.1867	217.333	570.333	1.28098	up	6.90944e-09	1.68792e-07	At1g67340	--
GLYMA_11G145200	5215	6.33	2.03667	416.667	147.667	-1.5813	down	7.04428e-09	1.71963e-07	At5g60700	--
GLYMA_08G303700	4949	7.53333	3.20333	593.333	275	-1.18569	down	7.10834e-09	1.7328e-07	At5g41750	K13457 disease resistance protein RPM1 | (RefSeq) disease resistance protein RPM1 (A)
GLYMA_17G007600	3590	11.06	4.75	710	338.667	-1.16046	down	7.10838e-09	1.7328e-07	At5g48150	K14494 DELLA protein | (RefSeq) DELLA protein DWARF8 (A)
GLYMA_02G118500	5244	13.2	4.9	522.333	212	-1.3783	down	7.11605e-09	1.73343e-07	At1g13740	--
GLYMA_04G056100	6805	2.45	5.47667	113.667	282	1.21844	up	7.19813e-09	1.75218e-07	At4g33520	K17686 P-type Cu+ transporter [EC:7.2.2.8] | (RefSeq) HMA8; chloroplast copper-translocating HMA8 P-ATPase (A)
GLYMA_07G238700	851	21.9467	42.35	334.333	718	1.00667	up	7.32051e-09	1.7807e-07	At5g49480	K02183 calmodulin | (RefSeq) calcium-binding protein CP1 (A)
GLYMA_10G234700	2064	4.87667	1.11333	135.667	34.6667	-2.06952	down	7.43592e-09	1.80748e-07	At5g52400	K20661 cytochrome P450 family 714 subfamily A1 | (RefSeq) LOW QUALITY PROTEIN: cytochrome P450 714A1-like (A)
GLYMA_20G195900	2516	37.9067	75.2367	1706.33	3867.67	1.05728	up	7.49981e-09	1.82172e-07	At5g07580	K09286 EREBP-like factor | (RefSeq) ethylene-responsive transcription factor 5-like (A)
GLYMA_03G181400	6996	12.82	4.24	1187.33	423.667	-1.54907	down	7.59152e-09	1.84137e-07	At5g03280	K14513 ethylene-insensitive protein 2 | (RefSeq) ethylene-insensitive protein 2 (A)
GLYMA_11G147600	2009	10.7267	4.14667	288.333	122.667	-1.32035	down	7.59835e-09	1.84172e-07	At5g60520	--
GLYMA_18G150000	5952	2.11	0.62	101	33	-1.70887	down	7.65066e-09	1.85309e-07	At4g37930	K00600 glycine hydroxymethyltransferase [EC:2.1.2.1] | (RefSeq) serine hydroxymethyltransferase 5 (A)
GLYMA_09G062900	6623	195.787	89.92	12290.7	6324.67	-1.061	down	7.67746e-09	1.85826e-07	At3g13750	K12309 beta-galactosidase [EC:3.2.1.23] | (RefSeq) beta-galactosidase 17 (A)
GLYMA_10G083100	1036	1.8	5.75	33.3333	120.333	1.74235	up	7.79274e-09	1.88483e-07	At2g35910	K10664 E3 ubiquitin-protein ligase ATL6/9/15/31/42/55 [EC:2.3.2.27] | (RefSeq) E3 ubiquitin-protein ligase ATL6 (A)
GLYMA_18G225400	778	2.20667	7.98	30.6667	127.333	1.9253	up	7.94324e-09	1.91987e-07	At3g61190	--
GLYMA_07G261500	2507	3.14333	7.89333	117.667	339.667	1.40416	up	8.46631e-09	2.04052e-07	At4g21990_1	K05907 adenylyl-sulfate reductase (glutathione) [EC:1.8.4.9] | (RefSeq) 5'-adenylylsulfate reductase 3, chloroplastic (A)
GLYMA_01G240900	4123	5.13333	1.76667	237	92.3333	-1.47136	down	8.64878e-09	2.08292e-07	At4g05200	K13416 brassinosteroid insensitive 1-associated receptor kinase 1 [EC:2.7.10.1 2.7.11.1] | (RefSeq) BRASSINOSTEROID INSENSITIVE 1-associated receptor kinase 1 (A)
GLYMA_06G050500	616	47.9767	93.9733	528.667	1177	1.03892	up	8.65442e-09	2.08292e-07	--	--
GLYMA_20G048300	4328	17.5667	7.95667	618	316.667	-1.07739	down	8.69854e-09	2.09206e-07	At1g14370	K13430 serine/threonine-protein kinase PBS1 [EC:2.7.11.1] | (RefSeq) serine/threonine-protein kinase PBS1 isoform X2 (A)
GLYMA_03G085500	4551	23.5667	9.90333	766.667	359	-1.19358	down	8.82271e-09	2.11894e-07	At3g07270	K01495 GTP cyclohydrolase IA [EC:3.5.4.16] | (RefSeq) GTP cyclohydrolase 1 (A)
GLYMA_16G011400	1903	19.12	41.6833	411.333	1028.33	1.19691	up	8.89969e-09	2.13593e-07	At1g54070	--
GLYMA_07G262700	3307	49.12	20.6967	2033	948	-1.19162	down	9.09492e-09	2.18125e-07	At4g04450	K18834 WRKY transcription factor 1 | (RefSeq) WRKY transcription factor 1 (A)
GLYMA_10G160400	3799	9.74333	4.27333	520.333	251	-1.13483	down	9.22069e-09	2.20831e-07	At3g04910	K08867 WNK lysine deficient protein kinase [EC:2.7.11.1] | (RefSeq) probable serine/threonine-protein kinase WNK9 isoform X1 (A)
GLYMA_13G322500	2207	17.5733	4.99667	469.333	154.667	-1.73807	down	9.42355e-09	2.25058e-07	At3g44990	K08235 xyloglucan:xyloglucosyl transferase [EC:2.4.1.207] | (RefSeq) uncharacterized protein LOC100796768 precursor (A)
GLYMA_20G159900	10117	2.73	6.53667	111	292	1.31489	up	9.47495e-09	2.26127e-07	At5g23870	K19882 O-palmitoleoyl-L-serine hydrolase [EC:3.1.1.98] | (RefSeq) pectin acetylesterase 9 isoform X1 (A)
GLYMA_01G186600	6772	32.26	68.45	1036.67	2496	1.15252	up	9.58761e-09	2.28657e-07	At5g67050	K16818 phospholipase A1 [EC:3.1.1.32] | (RefSeq) phospholipase A(1) DAD1, chloroplastic (A)
GLYMA_05G181500	1634	3.51	8.31	96.6667	258.333	1.30934	up	9.64102e-09	2.2977e-07	At4g39700	K07213 copper chaperone | (RefSeq) copper transport protein ATX1 (A)
GLYMA_08G118800	1984	3.42667	10.84	66	240	1.73	up	9.72546e-09	2.31621e-07	At2g29420	K00799 glutathione S-transferase [EC:2.5.1.18] | (RefSeq) tau class glutathione S-transferase (A)
GLYMA_10G147900	1224	0.533333	4.42333	7.33333	72	3.14187	up	9.7377e-09	2.31751e-07	At1g56320	--
GLYMA_09G204200	3357	1.90333	4.54667	114.333	308.667	1.3191	up	9.83607e-09	2.33766e-07	--	--
GLYMA_18G294400	7889	3.49	1.01	260.667	88	-1.69953	down	1.00235e-08	2.38055e-07	At4g11470	K13430 serine/threonine-protein kinase PBS1 [EC:2.7.11.1] | (RefSeq) serine/threonine protein kinase (A)
GLYMA_12G187400	1474	18.3433	38.5733	483.333	1159.67	1.13983	up	1.01037e-08	2.39793e-07	At5g22250	K12581 CCR4-NOT transcription complex subunit 7/8 | (RefSeq) CCR4 associated factor 1-related protein precursor (A)
GLYMA_04G008900	1786	81.1067	38.5567	2445	1313.33	-1.00683	down	1.03378e-08	2.44838e-07	At5g66320	--
GLYMA_05G139500	4443	10.48	4.2	372	164	-1.26697	down	1.03503e-08	2.44964e-07	At1g70740	K13416 brassinosteroid insensitive 1-associated receptor kinase 1 [EC:2.7.10.1 2.7.11.1] | (RefSeq) BRASSINOSTEROID INSENSITIVE 1-associated receptor kinase 1 (A)
GLYMA_15G067200	2165	9.98	3.66	386.667	162	-1.37597	down	1.04021e-08	2.46021e-07	At1g61350	--
GLYMA_02G247000	3160	55.33	130.93	1144.33	3102	1.30962	up	1.06024e-08	2.50236e-07	At1g66480	--
GLYMA_02G109100	2454	0.423333	2.41	13	80.6667	2.5656	up	1.07066e-08	2.52522e-07	At1g26770	K20628 expansin | (RefSeq) expansin-A15 (A)
GLYMA_20G048800	6359	2.78333	1.26667	300	151	-1.0822	down	1.0745e-08	2.53252e-07	At5g17680	K13457 disease resistance protein RPM1 | (RefSeq) disease resistance protein RPM1 isoform X2 (A)
GLYMA_03G076100	4808	25.9233	52.88	779.333	1793.67	1.0948	up	1.09011e-08	2.56754e-07	At3g54110	K15103 solute carrier family 25 (mitochondrial uncoupling protein), member 8/9 | (RefSeq) uncharacterized protein LOC100809667 (A)
GLYMA_09G062600	2183	10.4233	25.3933	234.333	635.333	1.34028	up	1.10079e-08	2.59091e-07	At4g25810	K14504 xyloglucan:xyloglucosyl transferase TCH4 [EC:2.4.1.207] | (RefSeq) xyloglucan endotransglucosylase/hydrolase 2 (A)
GLYMA_07G104200	2079	54.5033	116.743	1430.33	3525.67	1.17105	up	1.10702e-08	2.60379e-07	At1g18300	K07766 diphosphoinositol-polyphosphate diphosphatase [EC:3.6.1.52] | (RefSeq) nudix hydrolase 18, mitochondrial (A)
GLYMA_10G004800	11357	23.8933	9.9	1197.67	566	-1.20062	down	1.10887e-08	2.60634e-07	At3g23430	K24195 xenotropic and polytropic retrovirus receptor 1 | (RefSeq) PHO1-H4; phosphate transporter PHO1 (A)
GLYMA_09G250700	2984	12.42	25.3667	356.667	828.667	1.09883	up	1.11713e-08	2.62215e-07	At3g02800	K18045 tyrosine-protein phosphatase SIW14 [EC:3.1.3.48] | (RefSeq) tyrosine-protein phosphatase DSP3-like (A)
GLYMA_04G140400	1601	21.67	49.3467	359.667	937.667	1.2582	up	1.16854e-08	2.73864e-07	At3g27890	K19784 chromate reductase, NAD(P)H dehydrogenase (quinone) | (RefSeq) putative NADPH:quinone oxidoreductase (A)
GLYMA_02G005800	4715	14.2867	5.29	1119.67	480.333	-1.35747	down	1.20614e-08	2.8233e-07	At2g38940	K08176 MFS transporter, PHS family, inorganic phosphate transporter | (RefSeq) PHT1-14; inorganic phosphate transporter 1-14 (A)
GLYMA_12G113400	4748	4.16667	9.23667	166	404.667	1.20169	up	1.23275e-08	2.88317e-07	At4g28320	K19355 mannan endo-1,4-beta-mannosidase [EC:3.2.1.78] | (RefSeq) mannan endo-1,4-beta-mannosidase 2 (A)
GLYMA_07G268400	1439	4.67333	0.893333	77	17.3333	-2.2821	down	1.2334e-08	2.88317e-07	At5g47710	K12486 stromal membrane-associated protein | (RefSeq) ADP-ribosylation factor GTPase-activating protein AGD12 (A)
GLYMA_17G236800	3085	2.47333	5.73667	136.333	350	1.26598	up	1.25133e-08	2.92308e-07	At5g67360	--
GLYMA_17G118300	6882	1.63667	4.23333	95.3333	271.333	1.42046	up	1.25763e-08	2.93578e-07	At2g26650	K21867 potassium channel | (RefSeq) potassium channel AKT1-like (A)
GLYMA_07G188800	4490	23.8833	10.3833	1327.67	644.333	-1.1429	down	1.28751e-08	3.00348e-07	At4g21390	K13430 serine/threonine-protein kinase PBS1 [EC:2.7.11.1] | (RefSeq) serine/threonine-protein kinase PBS1 isoform X2 (A)
GLYMA_08G147900	2633	2.47333	6.95667	88	269	1.5413	up	1.29469e-08	3.01817e-07	At5g09760	K01051 pectinesterase [EC:3.1.1.11] | (RefSeq) pectinesterase 2 (A)
GLYMA_03G138600	3195	4.71667	1.74	269.667	110.333	-1.38013	down	1.35094e-08	3.14715e-07	At2g41900	K23047 E3 ubiquitin-protein ligase UNKL [EC:2.3.2.27] | (RefSeq) zinc finger CCCH domain-containing protein 2 (A)
GLYMA_10G238700	3735	6.75	15.6167	177	465.667	1.27668	up	1.38784e-08	3.22871e-07	At3g61060	--
GLYMA_16G014000	3172	19.8967	38.8533	755	1623.67	1.01866	up	1.40002e-08	3.25483e-07	At1g53840	K01051 pectinesterase [EC:3.1.1.11] | (RefSeq) pectinesterase (A)
GLYMA_06G167600	3680	0.503333	2.58	23	135.333	2.42915	up	1.40516e-08	3.26455e-07	At5g41040	K15400 omega-hydroxypalmitate O-feruloyl transferase [EC:2.3.1.188] | (RefSeq) omega-hydroxypalmitate O-feruloyl transferase (A)
GLYMA_15G052600	1929	0.11	1.85667	2.33333	44.3333	4.14018	up	1.46193e-08	3.39183e-07	At5g39580	K00430 peroxidase [EC:1.11.1.7] | (RefSeq) cationic peroxidase 2 (A)
GLYMA_12G198800	2355	4.70667	1.85667	198.333	86.3333	-1.28728	down	1.49285e-08	3.45888e-07	At2g19130	K13416 brassinosteroid insensitive 1-associated receptor kinase 1 [EC:2.7.10.1 2.7.11.1] | (RefSeq) somatic embryogenesis receptor-like kinase-like protein precursor (A)
GLYMA_05G042800	3836	0.04	1.27333	1.33333	46	5.01417	up	1.50196e-08	3.47763e-07	At3g26190	K20617 cytochrome P450 family 71 subfamily A | (RefSeq) CYP71A9; cytochrome P450 71A9 precursor (A)
GLYMA_15G172500	5123	1.12	2.85333	82	235	1.41034	up	1.51311e-08	3.50106e-07	At1g72770	K14497 protein phosphatase 2C [EC:3.1.3.16] | (RefSeq) protein phosphatase 2C 50 (A)
GLYMA_09G019900	1767	12.7233	27.7367	282	703.667	1.19431	up	1.5164e-08	3.50631e-07	At4g19700	K19042 E3 ubiquitin-protein ligase BOI and related proteins [EC:2.3.2.27] | (RefSeq) BOI-related E3 ubiquitin-protein ligase 1 (A)
GLYMA_13G089700	6828	35.3267	74.2767	2446.67	5633	1.12442	up	1.55342e-08	3.58463e-07	At1g78240	K23870 putative pectin methyltransferase [EC:2.1.1.-] | (RefSeq) probable pectin methyltransferase QUA2 (A)
GLYMA_06G065300	670	0.666667	4.15	8	54.3333	2.68547	up	1.5576e-08	3.59184e-07	At5g11060	--
GLYMA_02G202900	2519	3.53333	7.73667	159	387.667	1.19149	up	1.56033e-08	3.59572e-07	At4g30960	K07198 5'-AMP-activated protein kinase, catalytic alpha subunit [EC:2.7.11.11] | (RefSeq) CBL-interacting protein kinase 2 (A)
GLYMA_15G198500	1305	2.5	6.39333	58.3333	166.667	1.41585	up	1.5622e-08	3.59759e-07	At1g80520	--
GLYMA_06G103900	5329	2.85	0.58	94	21.3333	-2.23767	down	1.57803e-08	3.62916e-07	At1g34580	K24193 MFS transporter, SP family, sugar:H+ symporter | (RefSeq) sugar transport protein 5 (A)
GLYMA_06G131400	5135	0.926667	2.39	68.6667	197.333	1.43149	up	1.58625e-08	3.6456e-07	At5g24320	K20241 WD repeat-containing protein 44 | (RefSeq) uncharacterized protein LOC100806747 isoform X2 (A)
GLYMA_08G168300	417	42.84	90.3833	319.667	770	1.14838	up	1.59244e-08	3.65736e-07	At3g12830	K14488 SAUR family protein | (RefSeq) auxin-responsive protein SAUR71 (A)
GLYMA_17G156100	3202	81.0833	28.6567	3272.67	1333	-1.42996	down	1.61e-08	3.69521e-07	At4g37850	K13422 transcription factor MYC2 | (RefSeq) transcription factor MYC1 (A)
GLYMA_13G004400	4725	22.29	7.2	926	347.333	-1.55193	down	1.61789e-08	3.71082e-07	At2g32270	K14709 solute carrier family 39 (zinc transporter), member 1/2/3 | (RefSeq) zinc transporter 8 isoform X1 (A)
GLYMA_06G021400	1474	2.81667	7.35	74	216.667	1.4433	up	1.61981e-08	3.71274e-07	At5g42200	K19037 E3 ubiquitin-protein ligase ATL23 [EC:2.3.2.27] | (RefSeq) E3 ubiquitin-protein ligase ATL23 (A)
GLYMA_10G008500	1286	8.33667	18.3733	192	480.667	1.20679	up	1.65674e-08	3.78975e-07	At3g04580	K14509 ethylene receptor [EC:2.7.13.-] | (RefSeq) ethylene receptor 2 (A)
GLYMA_13G320600	2825	1.03667	5.08333	43	243.667	2.37037	up	1.66077e-08	3.79643e-07	At5g22810	--
GLYMA_02G082700	5543	15.9933	3.30333	419	102.667	-2.19067	down	1.67919e-08	3.83597e-07	At1g34060_2	K16903 L-tryptophan---pyruvate aminotransferase [EC:2.6.1.99] | (RefSeq) L-tryptophan--pyruvate aminotransferase 1 (A)
GLYMA_08G279700	4285	5.92	13.6533	122.333	320	1.27016	up	1.74437e-08	3.97953e-07	At5g10480	K10703 very-long-chain (3R)-3-hydroxyacyl-CoA dehydratase [EC:4.2.1.134] | (RefSeq) protein tyrosine phosphatase-like protein (A)
GLYMA_12G174100	3611	7.08	15.01	355	860.333	1.15758	up	1.76383e-08	4.02124e-07	At2g28350	K14486 auxin response factor | (RefSeq) auxin response factor 19 (A)
GLYMA_13G234500	1060	85.3367	34.93	1616.33	762	-1.21748	down	1.76606e-08	4.02365e-07	At1g28480	K03676 glutaredoxin 3 | (RefSeq) glutaredoxin-C9 (A)
GLYMA_04G032000	2023	0.24	2.06	6.33333	60	3.14628	up	1.7711e-08	4.03243e-07	At5g42760	--
GLYMA_17G104300	1269	19.89	45.19	451.667	1183	1.25735	up	1.78037e-08	4.04815e-07	At4g02040	--
GLYMA_06G149900	2580	14.3467	29.7467	617.333	1435.67	1.11185	up	1.7985e-08	4.08666e-07	At1g76880	--
GLYMA_06G167000	2759	1.88	6.85	45.3333	184.667	1.91758	up	1.81522e-08	4.1219e-07	At5g50790	K15382 solute carrier family 50 (sugar transporter) | (RefSeq) SWEET17; sugar efflux transporter SWEET17 (A)
GLYMA_09G093000	2745	95.7867	202.34	4698.67	11325.7	1.14821	up	1.82026e-08	4.13023e-07	--	--
GLYMA_17G092800	2111	20.0267	4.76667	411.333	111.667	-1.99171	down	1.82131e-08	4.13023e-07	At4g09600	--
GLYMA_11G140000	3875	3.61	1.34667	155.667	64.3333	-1.36765	down	1.83776e-08	4.16202e-07	At2g28840	K19044 E3 ubiquitin-protein ligase XBAT32/33 [EC:2.3.2.27] | (RefSeq) E3 ubiquitin-protein ligase XBAT33 (A)
GLYMA_08G118900	3502	0.833333	3.46333	17.3333	79.3333	2.10793	up	1.8478e-08	4.18197e-07	At2g29420	K00799 glutathione S-transferase [EC:2.5.1.18] | (RefSeq) probable glutathione S-transferase isoform X1 (A)
GLYMA_15G040700	887	2.64	9.36667	42	173.333	1.90721	up	1.85348e-08	4.19206e-07	At2g28710	--
GLYMA_16G216500	4066	0.5	2.15667	26.3333	128.667	2.17847	up	1.89146e-08	4.27512e-07	At1g73220	K08202 MFS transporter, OCT family, solute carrier family 22 (organic cation transporter), member 4/5 | (RefSeq) organic cation/carnitine transporter 4 (A)
GLYMA_20G209700	2788	7.03	2.72667	197	86.3333	-1.29763	down	1.90119e-08	4.29427e-07	At3g23250	K09422 transcription factor MYB, plant | (RefSeq) MYB29B2; MYB/HD-like transcription factor (A)
GLYMA_08G078500	2110	0.69	2.59	26	112.333	1.9803	up	1.91231e-08	4.31654e-07	At1g07090	--
GLYMA_19G215700	1068	30.9533	10.8567	591.333	237.667	-1.43355	down	1.92357e-08	4.33909e-07	--	--
GLYMA_18G029400	988	0.676667	3.97667	9.66667	66	2.63556	up	1.92848e-08	4.3473e-07	At4g23400	K09872 aquaporin PIP | (RefSeq) PIP1-10; probable aquaporin PIP-type 7a isoform X2 (A)
GLYMA_11G207300	9046	4.28333	1.51	179	72.3333	-1.42688	down	1.93372e-08	4.35622e-07	At1g70520	K13430 serine/threonine-protein kinase PBS1 [EC:2.7.11.1] | (RefSeq) serine/threonine-protein kinase PBS1 isoform X2 (A)
GLYMA_11G119900	3616	31.7867	11.4167	1170.67	450.667	-1.43435	down	1.94238e-08	4.37284e-07	At1g49320	--
GLYMA_12G068700	1919	7.16333	2.66667	185	75.6667	-1.37589	down	1.95302e-08	4.39391e-07	At5g60520	--
GLYMA_02G072500	1874	3.39667	11.2567	79.6667	308.667	1.80714	up	1.95521e-08	4.39594e-07	At3g03870	K00640 serine O-acetyltransferase [EC:2.3.1.30] | (RefSeq) serine acetyltransferase 3, mitochondrial (A)
GLYMA_05G025900	2815	7.19	2.66	249	104.333	-1.36179	down	1.96701e-08	4.41956e-07	At3g47500	--
GLYMA_10G179500	5918	6.94333	3.22667	607.333	316.667	-1.04265	down	1.99544e-08	4.48049e-07	At1g20780	K08332 vacuolar protein 8 | (RefSeq) U-box domain-containing protein 44 isoform X1 (A)
GLYMA_10G239300	1464	9.22667	19.5233	241.667	584.333	1.15082	up	2.04341e-08	4.58217e-07	At1g63040	K09286 EREBP-like factor | (RefSeq) AP2-2; AP2 domain-containing transcription factor 2 (A)
GLYMA_18G004200	5598	12.3867	5.88667	1109.67	590.667	-1.01286	down	2.08425e-08	4.67068e-07	At4g24290	--
GLYMA_13G162600	3185	0.58	2.79	20	102.667	2.29868	up	2.10486e-08	4.71377e-07	At5g20410	K03715 1,2-diacylglycerol 3-beta-galactosyltransferase [EC:2.4.1.46] | (RefSeq) monogalactosyldiacylglycerol synthase 2, chloroplastic (A)
GLYMA_11G083800	10175	1.24667	3.65667	40	133	1.6198	up	2.12117e-08	4.74718e-07	At1g20560	K23618 acyl-activating enzyme 11/12 [EC:6.2.1.2 6.2.1.-] | (RefSeq) trans-cinnamate:CoA ligase, peroxisomal (A)
GLYMA_17G217000	2319	11.16	4.40667	307	138	-1.27053	down	2.12417e-08	4.75079e-07	At4g19800	K01183 chitinase [EC:3.2.1.14] | (RefSeq) class V chitinase CHIT5 (A)
GLYMA_04G025100	3104	22.9833	48.21	566.333	1345.67	1.13055	up	2.17758e-08	4.8607e-07	At5g06300	K22522 cytokinin riboside 5'-monophosphate phosphoribohydrolase [EC:3.2.2.-] | (RefSeq) probable cytokinin riboside 5'-monophosphate phosphoribohydrolase LOGL10 isoform X2 (A)
GLYMA_12G134300	3625	12.0767	25.2733	305.333	719.333	1.12663	up	2.20867e-08	4.92689e-07	At5g54240	--
GLYMA_10G172600	4740	0.373333	1.47	17.3333	76.6667	2.03838	up	2.23181e-08	4.96924e-07	At4g24140	K13699 abhydrolase domain-containing protein 5 [EC:2.3.1.51] | (RefSeq) probable 1-acylglycerol-3-phosphate O-acyltransferase (A)
GLYMA_17G096900	10682	38.6633	17.19	2860	1437.67	-1.10222	down	2.23202e-08	4.96924e-07	At1g74770	K16276 zinc finger protein-like protein | (RefSeq) zinc finger protein BRUTUS-like At1g18910 isoform X2 (A)
GLYMA_18G052400	2720	3.77333	1.23667	116.667	42.3333	-1.55652	down	2.24498e-08	4.99157e-07	At5g36110	K20667 beta-amyrin 28-monooxygenase [EC:1.14.14.126] | (RefSeq) beta-amyrin 28-monooxygenase (A)
GLYMA_09G185900	4803	24.66	11.7333	954	516.333	-1.0031	down	2.35111e-08	5.22415e-07	At1g49050	K22683 aspartyl protease family protein [EC:3.4.23.-] | (RefSeq) aspartyl protease family protein 2 (A)
GLYMA_01G210400	2213	0.283333	2.28667	9	76.6667	3.03744	up	2.41097e-08	5.35368e-07	At4g17260	K00016 L-lactate dehydrogenase [EC:1.1.1.27] | (RefSeq) L-lactate dehydrogenase B (A)
GLYMA_11G192300	5562	1.77	4.47333	80.6667	224.333	1.39406	up	2.45451e-08	5.44682e-07	At3g44880	K13071 pheophorbide a oxygenase [EC:1.14.15.17] | (RefSeq) pheophorbide a oxygenase, chloroplastic (A)
GLYMA_01G195700	692	0.51	5.22333	5.33333	65.3333	3.44482	up	2.46471e-08	5.46234e-07	At2g22860	--
GLYMA_06G303200	4085	5.25	1.73333	244.667	91.3333	-1.52675	down	2.46871e-08	5.46767e-07	At3g21720	K01637 isocitrate lyase [EC:4.1.3.1] | (RefSeq) ICL1; isocitrate lyase 1 (A)
GLYMA_14G087900	9709	7.48333	3.44333	1162	592.667	-1.06169	down	2.48179e-08	5.49307e-07	At1g49890	K11137 telomere length regulation protein | (RefSeq) telomere length regulation protein TEL2 homolog (A)
GLYMA_05G197000	6527	13.0367	5.99667	569.333	287	-1.07035	down	2.51937e-08	5.57264e-07	At4g24290	--
GLYMA_04G042500	2551	0.91	3.16333	41.3333	159.333	1.85254	up	2.55039e-08	5.6376e-07	At2g19130	K13415 protein brassinosteroid insensitive 1 [EC:2.7.10.1 2.7.11.1] | (RefSeq) BRI1B; brassinosteroid receptor precursor (A)
GLYMA_12G062100	2770	8.56667	2.82333	423.667	160.667	-1.52947	down	2.56434e-08	5.66478e-07	At1g07530	K14494 DELLA protein | (RefSeq) DELLA protein 1 (A)
GLYMA_08G040800	1391	5.38	16.3367	133.667	476	1.68117	up	2.57834e-08	5.68841e-07	At1g13350	--
GLYMA_12G080100	2796	5	1.22667	133.667	37.6667	-1.955	down	2.57837e-08	5.68841e-07	At2g36870	K08235 xyloglucan:xyloglucosyl transferase [EC:2.4.1.207] | (RefSeq) xyloglucan endotransglucosylase/hydrolase protein 31 (A)
GLYMA_19G245200	2659	8.3	20.0667	192.333	537.333	1.35117	up	2.58204e-08	5.69281e-07	At3g04730	K14484 auxin-responsive protein IAA | (RefSeq) auxin-responsive protein IAA16 (A)
GLYMA_09G148900	4576	0.273333	1.49	15	88.3333	2.49227	up	2.61668e-08	5.75804e-07	At5g51830	K00847 fructokinase [EC:2.7.1.4] | (RefSeq) probable fructokinase-7 isoform X1 (A)
GLYMA_05G022100	3921	1.41333	0.16	48.3333	5.66667	-3.16159	down	2.6204e-08	5.76252e-07	At5g07990	K05280 flavonoid 3'-monooxygenase [EC:1.14.14.82] | (RefSeq) flavonoid 3'-monooxygenase (A)
GLYMA_18G193400	6059	30.8633	12.8267	1222.33	551	-1.21964	down	2.62897e-08	5.77765e-07	At3g09220	K05909 laccase [EC:1.10.3.2] | (RefSeq) laccase-7 (A)
GLYMA_01G070200	6482	5.71667	12.1467	174	412.333	1.14443	up	2.64112e-08	5.8006e-07	At1g68850	K00430 peroxidase [EC:1.11.1.7] | (RefSeq) peroxidase 11 (A)
GLYMA_15G266600	6692	27.74	12.82	1569	828	-1.04261	down	2.64604e-08	5.80768e-07	At3g12670	K01937 CTP synthase [EC:6.3.4.2] | (RefSeq) CTP synthase (A)
novel.1252	820	2.61333	0.273333	38.3333	4.66667	-3.15106	down	2.68118e-08	5.87726e-07	--	--
GLYMA_06G271700	1429	0.486667	3.84333	6.66667	59.3333	3.03795	up	2.69209e-08	5.89739e-07	--	--
GLYMA_07G251200	2826	2.32667	7.16667	44.3333	157.333	1.69857	up	2.76983e-08	6.0638e-07	At4g15630	--
GLYMA_06G135000	1431	2.64333	9.15	67.6667	275	1.87124	up	2.80947e-08	6.14663e-07	At5g03890	--
GLYMA_18G249700	3659	39.81	15.6933	2414.67	1073.67	-1.28383	down	2.83622e-08	6.2012e-07	At4g08850	K20718 LRR receptor-like serine/threonine-protein kinase ERECTA [EC:2.7.11.1] | (RefSeq) LRR receptor-like serine/threonine-protein kinase ERL1 isoform X1 (A)
GLYMA_15G150500	715	16.6567	56.8733	213	860.667	1.85205	up	2.83907e-08	6.20346e-07	--	--
GLYMA_08G261200	5427	1.63333	4.58333	38.3333	122	1.56061	up	2.92298e-08	6.37864e-07	At3g25900	K00547 homocysteine S-methyltransferase [EC:2.1.1.10] | (RefSeq) homocysteine S-methyltransferase 1 isoform X1 (A)
GLYMA_06G290200	2815	161.767	395.483	2562.67	7247.33	1.36181	up	2.95931e-08	6.4538e-07	At2g20630	K17506 protein phosphatase 1L [EC:3.1.3.16] | (RefSeq) probable protein phosphatase 2C 58 (A)
GLYMA_08G169800	2335	47.6333	12.1733	1436.67	435.667	-1.87641	down	2.98353e-08	6.50246e-07	At3g07720	K15450 tRNA wybutosine-synthesizing protein 3 [EC:2.1.1.282] | (RefSeq) tRNA wybutosine-synthesizing protein 2/3/4 isoform X1 (A)
GLYMA_05G109200	2172	0.556667	2.95	16.3333	96.3333	2.46061	up	2.99104e-08	6.51467e-07	At5g65790	K09422 transcription factor MYB, plant | (RefSeq) transcription factor RAX3 (A)
GLYMA_13G360000	5370	3.62667	8.38	157.333	400.667	1.26104	up	3.0058e-08	6.54264e-07	At3g15990	K17471 sulfate transporter 3 | (RefSeq) probable sulfate transporter 3.4 (A)
GLYMA_02G122700	5262	2.03333	4.08333	173.667	388	1.06525	up	3.01627e-08	6.56126e-07	At2g03810	--
GLYMA_17G163800	2660	154.607	311.97	2235.67	5173.67	1.08574	up	3.10384e-08	6.74316e-07	--	--
GLYMA_03G107900	1344	23.7	49.8267	371	892	1.14142	up	3.11942e-08	6.77268e-07	--	--
GLYMA_19G258800	724	21.4967	52.8333	278.667	792.667	1.37232	up	3.19678e-08	6.93183e-07	At2g46690	K14488 SAUR family protein | (RefSeq) auxin-responsive protein SAUR32 (A)
GLYMA_17G217100	6256	5.94333	2.69	308.333	156.333	-1.08284	down	3.24702e-08	7.03185e-07	At2g25180	K14491 two-component response regulator ARR-B family | (RefSeq) two-component response regulator ARR12 (A)
GLYMA_13G233300	4505	2.39667	0.886667	135.667	55.6667	-1.37877	down	3.26517e-08	7.06667e-07	At2g29120	K05387 glutamate receptor, ionotropic, plant | (RefSeq) glutamate receptor 3.4 (A)
GLYMA_05G238200	543	4.20667	15.26	40.6667	170.333	1.9301	up	3.28491e-08	7.1049e-07	At1g67920	--
GLYMA_04G016000	4663	0.69	2.11667	43	143.333	1.65917	up	3.29114e-08	7.11387e-07	At1g42540	K05387 glutamate receptor, ionotropic, plant | (RefSeq) glutamate receptor 3.3 (A)
GLYMA_10G263200	1670	3.02333	6.95667	90.3333	229.667	1.25599	up	3.29359e-08	7.11465e-07	At2g15320	--
GLYMA_18G072300	1448	0.94	3.23667	24.3333	93.6667	1.8419	up	3.30265e-08	7.12972e-07	At3g13310	K03686 molecular chaperone DnaJ | (RefSeq) chaperone protein dnaJ A6, chloroplastic (A)
GLYMA_01G004100	5143	12.49	5.58667	864	426.333	-1.10548	down	3.32955e-08	7.18324e-07	At2g19710	--
GLYMA_06G194500	4261	0.296667	1.62333	13	80.6667	2.52718	up	3.34341e-08	7.20859e-07	At1g74460	K00660 chalcone synthase [EC:2.3.1.74] | (RefSeq) CHS14; chalcone synthase (A)
GLYMA_09G043400	1265	20.4433	7.81333	388.333	167.667	-1.31832	down	3.37011e-08	7.26157e-07	At4g15910	--
GLYMA_16G157300	5145	4.74333	2.00667	221.333	104.333	-1.18056	down	3.41314e-08	7.34502e-07	At1g71870	K03327 multidrug resistance protein, MATE family | (RefSeq) protein DETOXIFICATION 54 (A)
GLYMA_19G164300	3238	0.603333	2.80667	35	170.333	2.25137	up	3.42638e-08	7.36888e-07	At2g38940	K08176 MFS transporter, PHS family, inorganic phosphate transporter | (RefSeq) PHT1-7; inorganic phosphate transporter 1-7 (A)
GLYMA_08G323600	1047	1.95333	5.65667	36.6667	117.667	1.59117	up	3.43465e-08	7.38202e-07	At5g55380	--
GLYMA_05G128200	4310	15.6367	33.7267	1039.33	2463.33	1.16407	up	3.43697e-08	7.38236e-07	At5g46330	K13420 LRR receptor-like serine/threonine-protein kinase FLS2 [EC:2.7.11.1] | (RefSeq) LRR receptor-like serine/threonine-protein kinase FLS2 (A)
GLYMA_18G236200	6393	5.14	10.6933	229	533.333	1.11812	up	3.45107e-08	7.40797e-07	At1g69070	K14766 nucleolar protein 14 | (RefSeq) nucleolar protein 14 (A)
GLYMA_20G013700	1099	10.21	22.8433	200.667	513.667	1.23439	up	3.45782e-08	7.41781e-07	--	--
GLYMA_09G008500	4783	5.38	10.8033	151	337.667	1.06674	up	3.47759e-08	7.45552e-07	At4g22260	K17893 ubiquinol oxidase [EC:1.10.3.11] | (RefSeq) PTOX; plastid terminal oxidase (A)
GLYMA_11G058900	5024	15.2033	6.77667	844.667	426.667	-1.09687	down	3.52941e-08	7.55715e-07	At5g66900	K13457 disease resistance protein RPM1 | (RefSeq) disease resistance protein RPM1 (A)
novel.423	2909	2.17667	5.23667	95.3333	262.333	1.33844	up	3.6444e-08	7.79848e-07	At2g47000	K06970 23S rRNA (adenine1618-N6)-methyltransferase [EC:2.1.1.181] | (RefSeq) RNA N6-adenosine-methyltransferase mettl16 isoform X1 (A)
GLYMA_04G223100	1072	2.31667	7.03667	44.3333	152.333	1.67173	up	3.73381e-08	7.97978e-07	--	--
GLYMA_10G180000	1111	54.8667	124.16	948.333	2483.67	1.25129	up	3.92227e-08	8.36686e-07	At1g04240	K14484 auxin-responsive protein IAA | (RefSeq) uncharacterized protein LOC100527777 (A)
GLYMA_17G157600	1863	30.77	79.0267	776.667	2259.33	1.42372	up	3.99228e-08	8.50661e-07	At4g37790	K09338 homeobox-leucine zipper protein | (RefSeq) homeobox-leucine zipper protein HAT22 (A)
GLYMA_19G148500	628	19.9967	8.42	224.667	106.667	-1.17943	down	3.99277e-08	8.50661e-07	--	--
GLYMA_01G153000	1976	5.52	11.5533	123	287	1.12464	up	3.99943e-08	8.51549e-07	At1g31720	--
GLYMA_19G158500	2099	0.23	2.49667	3.66667	43.6667	3.48969	up	4.01307e-08	8.53922e-07	At2g48140	--
GLYMA_05G191100	3783	0.01	1.07667	0.333333	45	6.87068	up	4.03153e-08	8.57316e-07	CE29003	--
GLYMA_11G107700	2981	16.9133	33.6333	376.333	852	1.06007	up	4.06663e-08	8.64241e-07	At3g51300	K04392 Ras-related C3 botulinum toxin substrate 1 | (RefSeq) rac-like GTP-binding protein RAC1-like (A)
GLYMA_12G226600	1349	125.363	245.153	3028	6776	1.03945	up	4.11116e-08	8.73162e-07	At3g15210	K09286 EREBP-like factor | (RefSeq) ERF6; ethylene-responsive transcription factor 6 (A)
GLYMA_02G064300	1617	127.22	36.67	2065	700.667	-1.70656	down	4.12034e-08	8.74567e-07	At2g02990	K01166 ribonuclease T2 [EC:4.6.1.19] | (RefSeq) ribonuclease 1 (A)
GLYMA_18G289100	2899	3.35333	7.34	148.333	358.333	1.18722	up	4.12926e-08	8.75916e-07	At3g12580	K03283 heat shock 70kDa protein 1/2/6/8 | (RefSeq) heat shock cognate 70 kDa protein 2 (A)
GLYMA_13G144300	7355	3.25333	1.18667	299.667	123.333	-1.3834	down	4.1385e-08	8.7733e-07	At5g03330	--
novel.1030	216	0	6.53333	0	28.3333	7.16267	up	4.15843e-08	8.8101e-07	--	--
GLYMA_15G078600	1499	84.6667	38.0267	2268.33	1169.33	-1.08295	down	4.23878e-08	8.96919e-07	At1g28480	K03676 glutaredoxin 3 | (RefSeq) glutaredoxin-C9 (A)
GLYMA_03G200400	2209	19.23	7.47	255.667	113	-1.29624	down	4.3526e-08	9.20434e-07	At5g42560	K17338 receptor expression-enhancing protein 1/2/3/4 | (RefSeq) HVA22-like protein j (A)
GLYMA_17G234000	1649	1.31667	6.2	31.3333	175.667	2.32253	up	4.37452e-08	9.24497e-07	At4g33800	--
GLYMA_06G195500	2091	8.46	16.9267	269.667	613	1.07105	up	4.38504e-08	9.26147e-07	At5g61430	--
GLYMA_10G028200	4983	0.276667	1.23667	18	90.6667	2.23047	up	4.55208e-08	9.60238e-07	At2g48140	K02895 large subunit ribosomal protein L24 | (RefSeq) LOW QUALITY PROTEIN: 50S ribosomal protein L24-like (A)
GLYMA_03G198600	1008	12.7033	4.18333	228.667	86.3333	-1.52576	down	4.66181e-08	9.82778e-07	At2g27310	--
GLYMA_01G225100	1917	1.26667	4.80333	34	145	1.98337	up	4.7209e-08	9.93211e-07	At2g29380	K14497 protein phosphatase 2C [EC:3.1.3.16] | (RefSeq) probable protein phosphatase 2C 8 isoform X1 (A)
GLYMA_17G165200	4667	10.6467	4.16667	448	189.667	-1.30609	down	4.72293e-08	9.93211e-07	At2g23150	K21398 natural resistance-associated macrophage protein 2 | (RefSeq) DMT1; ferrous ion membrane transport protein DMT1 (A)
GLYMA_11G096600	2598	4.00333	1.37	127.333	48.6667	-1.48866	down	4.77674e-08	1.00391e-06	At2g17040	--
GLYMA_15G084200	3308	2.51333	5.71333	133.667	334.333	1.23636	up	4.79214e-08	1.00653e-06	At5g45800	K13415 protein brassinosteroid insensitive 1 [EC:2.7.10.1 2.7.11.1] | (RefSeq) BRI1B; brassinosteroid receptor precursor (A)
GLYMA_10G244800	3262	4.02333	10.2	110.667	319.667	1.40794	up	4.84517e-08	1.01704e-06	--	--
GLYMA_12G141000	3139	13.28	4.65	548.667	211.333	-1.46447	down	4.88545e-08	1.02486e-06	At5g54510	K14487 auxin responsive GH3 gene family | (RefSeq) indole-3-acetic acid-amido synthetase GH3.6 (A)
GLYMA_17G187600	1449	169.467	362.997	4395	10876.7	1.17396	up	5.01501e-08	1.05075e-06	--	--
GLYMA_11G016100	2471	0.133333	0.95	6	47.3333	2.87011	up	5.17065e-08	1.0827e-06	At1g50420	K14494 DELLA protein | (RefSeq) DELLA protein 2 (A)
GLYMA_17G260700	720	0.413333	3.24667	5.33333	45.6667	3.01992	up	5.20472e-08	1.0885e-06	At5g42200	K19037 E3 ubiquitin-protein ligase ATL23 [EC:2.3.2.27] | (RefSeq) E3 ubiquitin-protein ligase ATL23 (A)
GLYMA_07G261100	959	4.17333	10.3733	71.6667	203	1.38461	up	5.24139e-08	1.09482e-06	At1g11740	--
GLYMA_15G082100	3261	0.366667	2.39667	11.3333	86.3333	2.78714	up	5.32375e-08	1.11106e-06	At2g27430	K08332 vacuolar protein 8 | (RefSeq) U-box domain-containing protein 15 (A)
GLYMA_20G013400	2382	19.23	5.99333	402.667	146.667	-1.60318	down	5.32561e-08	1.11106e-06	At2g01340	--
GLYMA_04G091800	2392	14.9967	6.65	642	309.667	-1.1253	down	5.33657e-08	1.11267e-06	At3g54400	K22683 aspartyl protease family protein [EC:3.4.23.-] | (RefSeq) aspartyl protease family protein 2 (A)
GLYMA_20G200500	1200	8.46333	3.11333	181.667	76.6667	-1.36589	down	5.50683e-08	1.14508e-06	At1g14920	K14494 DELLA protein | (RefSeq) DELLA protein 2 (A)
GLYMA_12G215800	4277	11.4	4.99667	385	192.333	-1.11785	down	5.50879e-08	1.14508e-06	At4g27250	K13082 bifunctional dihydroflavonol 4-reductase/flavanone 4-reductase [EC:1.1.1.219 1.1.1.234] | (RefSeq) bifunctional dihydroflavonol 4-reductase/flavanone 4-reductase-like (A)
GLYMA_17G231000	697	94.7733	205.71	1182	2920.67	1.18422	up	5.66723e-08	1.17658e-06	--	--
GLYMA_07G021300	3308	25.26	52.5633	1085.67	2546	1.11745	up	5.69015e-08	1.1799e-06	At2g24100	--
GLYMA_04G064800	4858	0.123333	0.766667	6.66667	46	2.69541	up	5.79598e-08	1.20112e-06	At4g32060	K22827 calcium uptake protein 1, mitochondrial | (RefSeq) calcium uptake protein, mitochondrial (A)
GLYMA_06G186300	6008	211.25	413.94	9122.67	20480.7	1.04018	up	6.00529e-08	1.24299e-06	At3g48170	K00130 betaine-aldehyde dehydrogenase [EC:1.2.1.8] | (RefSeq) ALDH10A2; betaine aldehyde dehydrogenase 1 (A)
GLYMA_11G201800	1870	50.38	133.163	400	1235.67	1.47914	up	6.1874e-08	1.2799e-06	At5g58240	K01522 bis(5'-adenosyl)-triphosphatase [EC:3.6.1.29] | (RefSeq) HIT-like superfamily protein (A)
GLYMA_13G156700	1134	19.9733	46.18	405.333	1086.33	1.2857	up	6.22144e-08	1.28617e-06	At4g02040	--
GLYMA_07G155200	2924	5.73667	20.67	111.667	465	1.92772	up	6.26482e-08	1.29435e-06	At5g01600	K00522 ferritin heavy chain [EC:1.16.3.2] | (RefSeq) ferritin (A)
GLYMA_13G244400	5441	14.1067	5.76333	585.667	270.667	-1.22533	down	6.30819e-08	1.30252e-06	At2g42150	--
GLYMA_05G049800	549	72.04	27.54	706.333	312.667	-1.31136	down	6.31224e-08	1.30257e-06	At1g63040	K09286 EREBP-like factor | (RefSeq) ethylene-responsive transcription factor ERF023 (A)
GLYMA_04G228400	2105	4.72667	1.60667	114	43	-1.49935	down	6.33389e-08	1.30625e-06	At5g24490	--
GLYMA_01G241700	607	2.89667	11.12	31.3333	140.667	2.01906	up	6.36401e-08	1.31167e-06	At3g19660	--
GLYMA_09G218600	2902	364.873	168.09	14814	7502.67	-1.0624	down	6.41106e-08	1.31977e-06	At5g45340	K09843 (+)-abscisic acid 8'-hydroxylase [EC:1.14.14.137] | (RefSeq) CYP707A1A; abscisic acid 8'-hydroxylase CYP707A2 (A)
GLYMA_17G121900	928	35.0533	89.4067	582	1733.67	1.4287	up	6.64219e-08	1.36653e-06	At1g49000	--
GLYMA_02G150600	2362	27.1233	9.36	1087.67	415.667	-1.47441	down	6.82895e-08	1.40242e-06	At2g48010	K13416 brassinosteroid insensitive 1-associated receptor kinase 1 [EC:2.7.10.1 2.7.11.1] | (RefSeq) BRASSINOSTEROID INSENSITIVE 1-associated receptor kinase 1 (A)
GLYMA_04G086900	7988	6.44	12.9867	246	543.333	1.06476	up	6.92388e-08	1.42106e-06	At5g56630	K00850 6-phosphofructokinase 1 [EC:2.7.1.11] | (RefSeq) ATP-dependent 6-phosphofructokinase 6 (A)
GLYMA_15G272700	798	20.7467	44.6233	296	729	1.17597	up	6.95298e-08	1.42618e-06	--	--
GLYMA_05G209000	1377	86.0067	39.2667	2117	1079	-1.07255	down	6.95938e-08	1.42663e-06	At5g41330	--
GLYMA_12G078900	2246	0.0833333	1.48	2	39.3333	4.20795	up	7.06641e-08	1.4477e-06	At5g60770	K02575 MFS transporter, NNP family, nitrate/nitrite transporter | (RefSeq) high affinity nitrate transporter 2.4 (A)
GLYMA_09G166000	3531	0.96	2.27667	59.3333	156.667	1.30062	up	7.1825e-08	1.4706e-06	At3g26618	K03265 peptide chain release factor subunit 1 | (RefSeq) eukaryotic peptide chain release factor subunit 1-3 (A)
GLYMA_15G265900	2011	0.97	5.65667	25.6667	178	2.63843	up	7.22487e-08	1.47839e-06	At2g18370	--
GLYMA_09G150000	5486	4.67667	9.54	426	992.333	1.0958	up	7.26586e-08	1.48589e-06	At4g25400	--
GLYMA_02G206300	6190	3.09	8.28667	168	506.333	1.48667	up	7.42946e-08	1.51572e-06	At2g24130	K13420 LRR receptor-like serine/threonine-protein kinase FLS2 [EC:2.7.11.1] | (RefSeq) probable LRR receptor-like serine/threonine-protein kinase At3g47570 (A)
GLYMA_14G104100	5146	15.2067	33.24	596.333	1453	1.18351	up	7.47843e-08	1.5248e-06	At4g31780	K03715 1,2-diacylglycerol 3-beta-galactosyltransferase [EC:2.4.1.46] | (RefSeq) MGD1; probable monogalactosyldiacylglycerol synthase, chloroplastic (A)
GLYMA_04G183300	1464	3.34333	8.36667	87.6667	252	1.39697	up	7.58646e-08	1.5459e-06	At5g62770	--
GLYMA_11G227200	2469	5.54667	2.27667	188.333	86.3333	-1.22283	down	7.6042e-08	1.54859e-06	At2g38090	K12133 MYB-related transcription factor LHY | (RefSeq) MYB114; MYB transcription factor MYB114 (A)
GLYMA_16G051800	1943	9.99667	3.57	183.333	74.3333	-1.41517	down	7.70138e-08	1.56651e-06	At5g13180	--
GLYMA_03G161300	9107	5.10333	2.13	419	189.667	-1.21438	down	7.90262e-08	1.60458e-06	At2g31320	K24070 poly [ADP-ribose] polymerase 1 [EC:2.4.2.30] | (RefSeq) poly [ADP-ribose] polymerase 1 (A)
GLYMA_05G064200	1863	36.86	15.2	1228.33	569.333	-1.21661	down	7.93437e-08	1.61007e-06	At4g16820	K16818 phospholipase A1 [EC:3.1.1.32] | (RefSeq) phospholipase A(1) DAD1, chloroplastic (A)
GLYMA_11G007900	1474	11.1133	23.98	221.667	540.333	1.1704	up	8.08866e-08	1.63943e-06	At1g05450	--
GLYMA_09G109800	2565	5.27333	13.74	126.333	369.333	1.44031	up	8.10201e-08	1.64116e-06	At5g06720	K00430 peroxidase [EC:1.11.1.7] | (RefSeq) peroxidase A2 (A)
GLYMA_13G282400	679	3.37667	11.5567	41	163	1.84939	up	8.12811e-08	1.64547e-06	At4g10270	--
GLYMA_08G261500	2540	1.94667	4.54	88.6667	234.333	1.29319	up	8.17192e-08	1.65336e-06	At1g68550	K13434 pathogenesis-related genes transcriptional activator PTI6 | (RefSeq) pathogenesis-related genes transcriptional activator PTI6 (A)
GLYMA_19G028200	3172	10.6567	23.3867	351	888	1.20652	up	8.23407e-08	1.66396e-06	At3g01050	--
GLYMA_11G216500	3009	46.1133	21.59	2481.67	1268.33	-1.04383	down	8.37451e-08	1.69034e-06	At1g14920	K14494 DELLA protein | (RefSeq) GAI2; DELLA protein 1 (A)
GLYMA_06G053400	2098	0.963333	4.71	17.3333	99.3333	2.37222	up	8.38196e-08	1.69085e-06	--	--
GLYMA_15G051200	1524	2.57667	8.59	46.3333	181.333	1.82252	up	8.66517e-08	1.74695e-06	At5g64530	--
GLYMA_15G258500	2794	18.3933	8.16	574.333	285	-1.10717	down	8.80719e-08	1.77453e-06	At1g56090	K09571 FK506-binding protein 4/5 [EC:5.2.1.8] | (RefSeq) 70 kDa peptidyl-prolyl isomerase (A)
GLYMA_06G158900	2758	3.61	8.84667	127.667	360.667	1.36781	up	8.85596e-08	1.78331e-06	--	K13173 arginine and glutamate-rich protein 1 | (RefSeq) uncharacterized protein At1g10890 (A)
GLYMA_09G119500	1688	0.703333	5.10333	9.33333	78.3333	2.93013	up	8.89928e-08	1.79097e-06	At1g22990	K07213 copper chaperone | (RefSeq) copper chaperone homolog CCH (A)
GLYMA_03G098600	2749	2.9	10.58	68	290	1.95002	up	9.08386e-08	1.82597e-06	At5g16970	K00344 NADPH:quinone reductase [EC:1.6.5.5] | (RefSeq) quinone oxidoreductase 1 (A)
GLYMA_01G168400	2342	1.03	5.55667	17.6667	107.667	2.49747	up	9.28865e-08	1.86604e-06	At1g80160	K08234 glyoxylase I family protein | (RefSeq) GLYI-23; putative lactoylglutathione lyase (A)
GLYMA_14G214100	2320	0.626667	2.93667	13.6667	70.3333	2.27997	up	9.5851e-08	1.9222e-06	At1g74460	--
GLYMA_11G042900	4267	2.78333	5.79	99.3333	229	1.11242	up	9.93931e-08	1.99206e-06	At5g46640	--
GLYMA_03G038200	3219	2.16667	0.45	75.6667	18.3333	-2.16861	down	1.00779e-07	2.01865e-06	At5g05340	K00430 peroxidase [EC:1.11.1.7] | (RefSeq) cationic peroxidase 1 (A)
GLYMA_02G111500	15718	21.9533	43.06	1437.33	3125	1.02874	up	1.01618e-07	2.03427e-06	At1g69450	K21989 calcium permeable stress-gated cation channel | (RefSeq) CSC1-like protein At1g69450 isoform X1 (A)
GLYMA_08G066900	3025	3.56667	8.03333	88.3333	224	1.23999	up	1.02813e-07	2.05578e-06	At2g23970	K22314 glucosinolate gamma-glutamyl hydrolase [EC:3.4.19.16] | (RefSeq) gamma-glutamyl peptidase 5 (A)
GLYMA_09G272100	9134	1.30667	3.11667	127.333	334.667	1.30514	up	1.03187e-07	2.06204e-06	At2g34930	K20718 LRR receptor-like serine/threonine-protein kinase ERECTA [EC:2.7.11.1] | (RefSeq) LRR receptor-like serine/threonine-protein kinase ERECTA precursor (A)
GLYMA_11G097700	1686	0.273333	3.12667	3.33333	43.6667	3.59585	up	1.03875e-07	2.07459e-06	At4g01470	K09866 aquaporin-4 | (RefSeq) XIP1-1; aquaporin TIP1-2 (A)
GLYMA_04G219200	5149	3.22667	7.62333	83	220	1.30669	up	1.04792e-07	2.09168e-06	At2g21940	K00891 shikimate kinase [EC:2.7.1.71] | (RefSeq) shikimate kinase, chloroplastic isoform X2 (A)
GLYMA_01G155400	2356	2.88	6.84333	68.6667	186	1.32206	up	1.05231e-07	2.09802e-06	At1g14130	K23947 2-oxoglutarate-dependent dioxygenase [EC:1.14.11.-] | (RefSeq) 2-oxoglutarate-dependent dioxygenase DAO (A)
GLYMA_13G251700	777	2.98333	0.253333	41.3333	3.66667	-3.56474	down	1.05546e-07	2.10304e-06	At3g19690	K13449 pathogenesis-related protein 1 | (RefSeq) PR1-3; pathogenesis-related protein 1 precursor (A)
GLYMA_08G365900	4170	4.04	9.3	149.667	376.333	1.25562	up	1.06418e-07	2.11671e-06	At3g02570	K01809 mannose-6-phosphate isomerase [EC:5.3.1.8] | (RefSeq) mannose-6-phosphate isomerase 1 (A)
GLYMA_16G031400	2741	0.22	2.85	3	45.3333	3.786	up	1.06521e-07	2.11753e-06	At1g64000	K18835 WRKY transcription factor 2 | (RefSeq) WRKY59; probable WRKY transcription factor 2 (A)
novel.693	3868	0.35	2.74333	6.66667	61.6667	3.05443	up	1.07289e-07	2.13155e-06	--	--
GLYMA_12G087200	2068	433.97	203.477	16047.3	8610.67	-1.02368	down	1.07515e-07	2.1348e-06	At2g27690	K20624 12-hydroxyjasmonoyl-L-amino acid 12-hydroxylase / fatty acid hydroxylase [EC:1.14.14.49] | (RefSeq) cytochrome P450 94C1 (A)
GLYMA_U029900	990	28.2267	55.56	500.333	1122.67	1.04721	up	1.08942e-07	2.16188e-06	At1g58420	--
GLYMA_07G124400	2720	10.2633	0.203333	276.667	6.66667	-5.53827	down	1.10197e-07	2.18551e-06	At1g55290	K06892 feruloyl-CoA 6-hydroxylase [EC:1.14.11.61] | (RefSeq) feruloyl CoA ortho-hydroxylase F6H1-3 (A)
GLYMA_16G023000	1425	24.6233	10.6433	514.333	253.667	-1.1419	down	1.16404e-07	2.30459e-06	At5g49330	K09422 transcription factor MYB, plant | (RefSeq) MYB92; MYB transcription factor MYB92 (A)
GLYMA_05G202700	2546	16.9633	6.55667	389.333	163	-1.32433	down	1.17312e-07	2.32123e-06	At5g50790	K15382 solute carrier family 50 (sugar transporter) | (RefSeq) SWEET11; sugar efflux transporter SWEET11 (A)
GLYMA_15G044400	4889	15.75	41.7933	792	2260	1.45405	up	1.18416e-07	2.34035e-06	At2g28550	K09284 AP2-like factor, euAP2 lineage | (RefSeq) ethylene-responsive transcription factor RAP2-7 isoform X1 (A)
GLYMA_09G277900	3117	6.32667	1.59	139	41	-1.89946	down	1.1913e-07	2.35312e-06	At5g05340	K00430 peroxidase [EC:1.11.1.7] | (RefSeq) cationic peroxidase 1 (A)
GLYMA_09G057100	3596	3.35667	0.81	92.3333	26	-1.95613	down	1.19231e-07	2.35374e-06	At2g18980	K00430 peroxidase [EC:1.11.1.7] | (RefSeq) peroxidase 16 (A)
GLYMA_04G197700	543	0	2.44667	0	27	7.08091	up	1.21032e-07	2.38791e-06	--	--
GLYMA_14G195300	1464	8.47667	17.5567	221.667	523.333	1.11926	up	1.21771e-07	2.40112e-06	At2g30040	K20716 mitogen-activated protein kinase kinase kinase 17/18 | (RefSeq) mitogen-activated protein kinase kinase kinase 18 (A)
GLYMA_18G266900	2891	1.94667	0.493333	100.333	28.6667	-1.91958	down	1.26927e-07	2.49845e-06	At5g15870	K01180 endo-1,3(4)-beta-glucanase [EC:3.2.1.6] | (RefSeq) probable endo-1,3(4)-beta-glucanase ARB_01444 (A)
GLYMA_18G052100	8153	10.7167	25.2333	711	1818.33	1.2842	up	1.27052e-07	2.49929e-06	At2g30470	K09287 RAV-like factor | (RefSeq) RAV1; AP2/ERF transcription factor family protein RAV1 (A)
GLYMA_17G108000	2851	2.86	5.91667	119	278	1.11536	up	1.27116e-07	2.49929e-06	At4g22720	K01409 N6-L-threonylcarbamoyladenine synthase [EC:2.3.1.234] | (RefSeq) probable tRNA N6-adenosine threonylcarbamoyltransferase (A)
GLYMA_18G225300	980	3.12	12.0267	40	179.667	2.02791	up	1.28323e-07	2.52157e-06	At2g45760	--
GLYMA_02G167600	2333	26.29	51.7	830.333	1867	1.0436	up	1.31454e-07	2.5816e-06	At3g11910	K11838 ubiquitin carboxyl-terminal hydrolase 7 [EC:3.4.19.12] | (RefSeq) ubiquitin C-terminal hydrolase 12 isoform X1 (A)
GLYMA_03G054500	723	0.0266667	2.75667	0.333333	40.3333	6.70283	up	1.32005e-07	2.59094e-06	--	--
GLYMA_08G346900	4760	1.19667	3.47333	39	128.333	1.60705	up	1.33158e-07	2.61208e-06	At3g07310	--
GLYMA_19G004900	2004	0.95	2.68	34	108.667	1.56704	up	1.33644e-07	2.61906e-06	At3g27650	K13944 LOB domain-containing protein 16 | (RefSeq) LOB domain-containing protein 16 (A)
GLYMA_08G021900	2224	60.3233	21.9733	2144	871.667	-1.39993	down	1.34621e-07	2.63471e-06	At4g23810	K13425 WRKY transcription factor 22 | (RefSeq) WRKY transcription factor 22 (A)
GLYMA_17G182200	1136	1.67667	6.03333	20.3333	81.3333	1.90425	up	1.35585e-07	2.65206e-06	At4g37300	--
GLYMA_11G239300	3136	1.73333	4.52333	53	151.667	1.43393	up	1.36982e-07	2.67499e-06	At5g65140	K01087 trehalose 6-phosphate phosphatase [EC:3.1.3.12] | (RefSeq) probable trehalose-phosphate phosphatase J (A)
GLYMA_20G198800	2790	7.31	15.0167	164.333	376.667	1.10031	up	1.36988e-07	2.67499e-06	At5g48820	--
GLYMA_16G013600	1774	5.06667	12.1733	121.667	336	1.33625	up	1.36992e-07	2.67499e-06	--	--
GLYMA_12G111500	4739	1.91333	6.50333	73.3333	293.333	1.84397	up	1.37383e-07	2.6811e-06	At1g03670	K15503 serine/threonine-protein phosphatase 6 regulatory ankyrin repeat subunit B | (RefSeq) protein ACCELERATED CELL DEATH 6 (A)
GLYMA_18G060900	1655	3.58333	9.18333	74.6667	220.333	1.43392	up	1.38418e-07	2.69974e-06	At2g30040	K20716 mitogen-activated protein kinase kinase kinase 17/18 | (RefSeq) mitogen-activated protein kinase kinase kinase 18 (A)
GLYMA_03G239900	1101	18.17	7.72667	357.667	171	-1.17132	down	1.39908e-07	2.72724e-06	At3g05200	K10664 E3 ubiquitin-protein ligase ATL6/9/15/31/42/55 [EC:2.3.2.27] | (RefSeq) E3 ubiquitin-protein ligase ATL6 (A)
GLYMA_13G104600	4892	2.07	0.356667	71.3333	14.3333	-2.44055	down	1.40695e-07	2.74103e-06	At5g56970	K00279 cytokinin dehydrogenase [EC:1.5.99.12] | (RefSeq) cytokinin dehydrogenase 3 (A)
GLYMA_14G110600	6109	2.89333	1.13667	149	64.6667	-1.29601	down	1.41281e-07	2.75087e-06	At2g25180	K14491 two-component response regulator ARR-B family | (RefSeq) two-component response regulator ARR12 (A)
GLYMA_05G006600	3600	48.8367	20.5833	918.333	446.667	-1.17248	down	1.43026e-07	2.77852e-06	At5g14700	K09753 cinnamoyl-CoA reductase [EC:1.2.1.44] | (RefSeq) cinnamoyl-CoA reductase 1 (A)
GLYMA_20G131600	2837	33.8533	14.32	814	396.333	-1.16619	down	1.43306e-07	2.78236e-06	At1g49850	K16283 E3 ubiquitin-protein ligase SDIR1 [EC:2.3.2.27] | (RefSeq) uncharacterized protein LOC100777936 (A)
GLYMA_15G206400	5902	2.6	0.656667	124.333	36	-1.90251	down	1.44296e-07	2.79841e-06	At1g11330	K01183 chitinase [EC:3.2.1.14] | (RefSeq) class V chitinase (A)
GLYMA_08G260500	2502	51.42	23.5233	1677.33	877.333	-1.05945	down	1.4527e-07	2.8157e-06	At1g13340	--
GLYMA_07G074100	2822	1.90333	5.51333	62.6667	208.667	1.60459	up	1.45745e-07	2.82331e-06	At3g61220	K15095 (+)-neomenthol dehydrogenase [EC:1.1.1.208] | (RefSeq) short-chain dehydrogenase/reductase domain-containing protein (A)
GLYMA_15G009500	1854	45.84	18.9633	689.333	327.667	-1.19588	down	1.45917e-07	2.82504e-06	At1g80160	--
novel.1301	928	0.04	2.39	0.666667	46.6667	5.98178	up	1.46067e-07	2.82634e-06	--	--
GLYMA_09G024900	5799	2.48667	0.853333	222.333	82	-1.50685	down	1.48028e-07	2.86266e-06	At4g20940	K13418 somatic embryogenesis receptor kinase 1 [EC:2.7.10.1 2.7.11.1] | (RefSeq) somatic embryogenesis receptor kinase 2 (A)
GLYMA_14G101100	4631	7.57667	3.27667	279.333	136.333	-1.14145	down	1.48145e-07	2.8633e-06	At5g10820	--
GLYMA_19G162200	207	35.4767	7.69	131.333	33	-2.12327	down	1.49373e-07	2.88213e-06	--	--
novel.532	2137	251.187	111.997	9596.67	4758	-1.10731	down	1.51477e-07	2.92061e-06	At5g12010	--
GLYMA_11G239900	1019	21.2567	46.43	388	974	1.20019	up	1.51538e-07	2.92061e-06	At5g10210	--
GLYMA_18G191600	1061	2.81667	7.60667	53.3333	164.333	1.50361	up	1.52441e-07	2.93636e-06	At5g55450	--
GLYMA_11G045800	3828	3.05	6.43333	131.333	305	1.1321	up	1.52737e-07	2.94041e-06	At4g37750	K09285 AP2-like factor, ANT lineage | (RefSeq) AP2-like ethylene-responsive transcription factor ANT isoform X2 (A)
GLYMA_18G210000	1428	3.00333	8.22667	62.3333	191.667	1.51244	up	1.53052e-07	2.94481e-06	At5g01750	--
GLYMA_06G079500	3445	1.88333	6.12667	58.3333	222.333	1.78256	up	1.54989e-07	2.97872e-06	At5g10580	--
GLYMA_15G167300	963	4.01	14.3	69.3333	287.333	1.91221	up	1.55126e-07	2.97967e-06	--	--
GLYMA_17G159600	1242	21.07	55.82	467.333	1433.67	1.47442	up	1.56074e-07	2.99535e-06	At2g22880	--
GLYMA_03G264100	5308	4.78667	1.98667	172	80.6667	-1.20073	down	1.56118e-07	2.99535e-06	At4g13420	K03549 KUP system potassium uptake protein | (RefSeq) HAK; uncharacterized protein LOC100786294 (A)
GLYMA_08G194900	2210	0.89	3.82	20	92.3333	2.14027	up	1.56537e-07	3.00172e-06	At1g17710	K13248 pyridoxal phosphate phosphatase PHOSPHO2 [EC:3.1.3.74] | (RefSeq) inorganic pyrophosphatase 2 (A)
GLYMA_05G144600	1467	2.65333	0.4	53.3333	9	-2.66581	down	1.56802e-07	3.0051e-06	At3g26040	K13065 shikimate O-hydroxycinnamoyltransferase [EC:2.3.1.133] | (RefSeq) stemmadenine O-acetyltransferase isoform X1 (A)
GLYMA_15G214300	722	0	2.86667	0	34	7.35976	up	1.57988e-07	3.02463e-06	At1g65800	K13430 serine/threonine-protein kinase PBS1 [EC:2.7.11.1] | (RefSeq) serine/threonine-protein kinase (A)
novel.1509	1191	0	1.24333	0	24	6.91329	up	1.57998e-07	3.02463e-06	At5g01500	K14684 solute carrier family 25 (mitochondrial phosphate transporter), member 23/24/25/41 | (RefSeq) probable envelope ADP,ATP carrier protein, chloroplastic (A)
GLYMA_11G238400	7850	5.26	12.8567	226.667	622	1.34701	up	1.6032e-07	3.06393e-06	At5g10180	K17469 sulfate transporter 2, low-affinity | (RefSeq) sulfate transporter 2.1 (A)
GLYMA_13G176400	2488	122.16	243.02	5436.67	12307	1.05728	up	1.61037e-07	3.07592e-06	CE01921	K08770 ubiquitin C | (RefSeq) polyubiquitin 3 (A)
GLYMA_04G147600	3502	1.34667	4.18	34	118	1.69647	up	1.63684e-07	3.12299e-06	At2g26660	K24195 xenotropic and polytropic retrovirus receptor 1 | (RefSeq) PHO1-H1; phosphate transporter PHO1 (A)
GLYMA_20G244300	4524	2.98	6.77667	134.333	347.333	1.25015	up	1.63949e-07	3.1263e-06	At3g12620	K01102 pyruvate dehydrogenase phosphatase [EC:3.1.3.43] | (RefSeq) probable protein phosphatase 2C 46 (A)
GLYMA_02G000500	1885	10.76	21.5333	223	507.667	1.07223	up	1.64225e-07	3.1298e-06	At5g43700	K14484 auxin-responsive protein IAA | (RefSeq) auxin-induced protein 22B (A)
GLYMA_08G138600	7090	13.29	26.8667	569	1266.33	1.06813	up	1.6513e-07	3.14354e-06	At5g10180	K17469 sulfate transporter 2, low-affinity | (RefSeq) sulfate transporter 2.1 (A)
GLYMA_04G196100	1957	12.3867	5.34667	426	200	-1.16302	down	1.65243e-07	3.14394e-06	At3g48560	K01652 acetolactate synthase I/II/III large subunit [EC:2.2.1.6] | (RefSeq) acetolactate synthase 3, chloroplastic (A)
GLYMA_10G199500	1190	17.2533	36.1	367	877.667	1.13196	up	1.65612e-07	3.14921e-06	--	--
GLYMA_09G003900	2413	3.69333	11.3467	86.3333	312.333	1.70374	up	1.68246e-07	3.19751e-06	At1g62040	K08341 GABA(A) receptor-associated protein | (RefSeq) ATG8C; autophagy-related protein 8c (A)
GLYMA_10G045100	6789	3.48333	8.13333	249.667	674	1.29612	up	1.68662e-07	3.20364e-06	At2g37440	K01099 inositol polyphosphate 5-phosphatase INPP5B/F [EC:3.1.3.36] | (RefSeq) type IV inositol polyphosphate 5-phosphatase 9 isoform X2 (A)
GLYMA_20G230700	2139	5.92	2.51333	226.333	105.333	-1.18837	down	1.68769e-07	3.20389e-06	At5g27330	--
GLYMA_15G105300	4377	9.21667	4.31333	393	209.667	-1.02234	down	1.69068e-07	3.20779e-06	At5g19160	K23877 xyloglucan O-acetyltransferase | (RefSeq) protein ALTERED XYLOGLUCAN 4 (A)
GLYMA_07G257700	4495	21.17	44.1667	524	1243.33	1.13101	up	1.73997e-07	3.29947e-06	At5g19140	--
GLYMA_15G143700	6805	9.04667	3.59	461.333	199	-1.28828	down	1.74936e-07	3.31543e-06	At5g49360	K15920 xylan 1,4-beta-xylosidase [EC:3.2.1.37] | (RefSeq) beta-xylosidase/alpha-L-arabinofuranosidase 2 isoform X1 (A)
GLYMA_11G018100	1451	0.103333	1.18	2.66667	34	3.57695	up	1.77125e-07	3.35506e-06	At1g64380	K09286 EREBP-like factor | (RefSeq) ethylene-responsive transcription factor RAP2-4 (A)
GLYMA_09G174200	6521	9.41333	20.42	328.667	789	1.17425	up	1.79372e-07	3.39198e-06	At3g17860	K13464 jasmonate ZIM domain-containing protein | (RefSeq) protein TIFY 6B isoform X1 (A)
GLYMA_02G018500	1293	7.4	17.0167	171	451	1.27107	up	1.79547e-07	3.39341e-06	At4g02440	--
GLYMA_07G045500	1451	16.94	44.6333	321	988	1.47689	up	1.80934e-07	3.41583e-06	At3g14260	--
GLYMA_09G222300	698	0.483333	3.28667	6	47	2.84801	up	1.93447e-07	3.64001e-06	At1g75590	K14488 SAUR family protein | (RefSeq) auxin-induced protein 10A5-like (A)
GLYMA_13G042300	1865	5.92667	11.72	197.667	444.333	1.05197	up	1.94397e-07	3.65477e-06	At1g72220	K19041 E3 ubiquitin-protein ligase RNF38/44 [EC:2.3.2.27] | (RefSeq) RING-H2 finger protein ATL65 (A)
GLYMA_02G244900	2661	0.256667	1.61667	6.33333	45	2.72519	up	1.94446e-07	3.65477e-06	At1g74460	--
GLYMA_16G142100	4823	7.58	3.27333	235	115	-1.14127	down	1.95967e-07	3.6793e-06	At2g23790	K20858 calcium uniporter protein, mitochondrial | (RefSeq) calcium uniporter protein 2, mitochondrial (A)
GLYMA_02G155700	6468	0.16	1.67	4.33333	51.3333	3.45787	up	1.98543e-07	3.72359e-06	At1g02850	K19964 hydroxyisourate hydrolase [EC:3.5.2.17] | (RefSeq) hydroxyisourate hydrolase (A)
GLYMA_14G061300	2606	7.88333	2.85	309.333	128.667	-1.38919	down	2.00205e-07	3.75269e-06	At2g29670	--
GLYMA_01G144900	3757	7.25667	2.99333	281	130	-1.21624	down	2.01654e-07	3.77778e-06	At2g45480	--
GLYMA_02G284100	7602	19.64	9.35	1733.33	912.333	-1.01224	down	2.02929e-07	3.79542e-06	At5g17680	K13457 disease resistance protein RPM1 | (RefSeq) LOW QUALITY PROTEIN: disease resistance protein RPM1 (A)
GLYMA_02G099500	2223	120.163	231.667	4781.33	10497	1.01321	up	2.04e-07	3.81335e-06	At1g25560	K09287 RAV-like factor | (RefSeq) AP2/ERF and B3 domain-containing transcription repressor TEM1 (A)
GLYMA_18G005800	2227	0.06	1.9	1	37	5.0798	up	2.05312e-07	3.83579e-06	At1g27950	--
GLYMA_14G069200	3134	44.0233	90.6867	867	2053.33	1.11205	up	2.14814e-07	4.00892e-06	At1g66480	--
GLYMA_14G044400	3207	40.0067	16.6	2294	1103	-1.19299	down	2.15134e-07	4.0127e-06	At1g45616	--
GLYMA_11G107800	1649	4.20667	10.0433	81.6667	216	1.30804	up	2.17891e-07	4.06191e-06	At5g53300	K06689 ubiquitin-conjugating enzyme E2 D [EC:2.3.2.23] | (RefSeq) uncharacterized protein LOC100499741 (A)
GLYMA_U043300	4408	0	1.40667	0	26.3333	7.14356	up	2.21031e-07	4.1182e-06	At1g49670_1	K09841 xanthoxin dehydrogenase [EC:1.1.1.288] | (RefSeq) xanthoxin dehydrogenase (A)
GLYMA_18G213300	1454	10.0433	23.0833	191.333	504.667	1.2767	up	2.26014e-07	4.20874e-06	At5g43180	--
GLYMA_15G228300	692	581.663	251.847	7201.67	3596.67	-1.13566	down	2.29727e-07	4.27554e-06	--	--
GLYMA_03G001600	3400	1.79	0.406667	92	23	-2.08552	down	2.33626e-07	4.34102e-06	At2g38600	K12742 isoprene synthase [EC:4.2.3.27] | (RefSeq) TPS9; tricyclene synthase EBOS, chloroplastic (A)
GLYMA_06G262300	6735	2.49	0.756667	114	38	-1.67688	down	2.35176e-07	4.36744e-06	At1g65790	K13416 brassinosteroid insensitive 1-associated receptor kinase 1 [EC:2.7.10.1 2.7.11.1] | (RefSeq) BRASSINOSTEROID INSENSITIVE 1-associated receptor kinase 1 (A)
GLYMA_04G035200	688	4.15	12.6067	51	177	1.67846	up	2.38542e-07	4.42754e-06	--	--
GLYMA_12G042400	5448	2.19667	0.526667	104.667	27.3333	-2.01862	down	2.42755e-07	4.50329e-06	At4g39210	K00975 glucose-1-phosphate adenylyltransferase [EC:2.7.7.27] | (RefSeq) glucose-1-phosphate adenylyltransferase large subunit 1 (A)
GLYMA_08G268900	7959	11.0233	5.25	999.333	524.333	-1.01439	down	2.43014e-07	4.50566e-06	At1g68710	K01530 phospholipid-translocating ATPase [EC:7.6.2.1] | (RefSeq) putative phospholipid-transporting ATPase 9 (A)
GLYMA_04G052600	2853	16.04	36.4733	471.333	1234	1.25719	up	2.45685e-07	4.55271e-06	At5g11950	K22522 cytokinin riboside 5'-monophosphate phosphoribohydrolase [EC:3.2.2.-] | (RefSeq) uncharacterized protein LOC100306704 (A)
GLYMA_02G217900	1312	0.06	1.86667	1	36	5.03712	up	2.4582e-07	4.55274e-06	At5g65660	--
GLYMA_11G111700	2014	7.61667	2.08333	227	73	-1.77642	down	2.47296e-07	4.57759e-06	At5g66320	--
GLYMA_06G012900	4257	20.3533	39.3433	795.667	1682.33	1.00168	up	2.47569e-07	4.57768e-06	At2g16230	K19891 glucan endo-1,3-beta-glucosidase 1/2/3 [EC:3.2.1.39] | (RefSeq) glucan endo-1,3-beta-glucosidase 3 isoform X1 (A)
GLYMA_10G014800	7197	3.79667	1.57	343.667	155.333	-1.22309	down	2.47911e-07	4.58153e-06	At2g25920	--
GLYMA_16G110100	3691	3.64667	1.28333	149	57.3333	-1.46525	down	2.49059e-07	4.60025e-06	At1g31770	K05681 ATP-binding cassette, subfamily G (WHITE), member 2 | (RefSeq) ABC transporter G family member 14 (A)
GLYMA_09G217600	186	79.3267	156.213	264.333	591.667	1.04973	up	2.51206e-07	4.63489e-06	--	--
GLYMA_05G126900	2850	16.2267	31.6267	710	1580.33	1.03075	up	2.52454e-07	4.6554e-06	At5g61820	--
GLYMA_19G209500	1821	8.35	3.14667	218.667	94.6667	-1.32707	down	2.55328e-07	4.70333e-06	At5g27690	K07213 copper chaperone | (RefSeq) uncharacterized protein LOC100305622 (A)
GLYMA_15G009900	2896	2.83667	7.75333	59.3333	184.333	1.51783	up	2.57662e-07	4.74121e-06	At1g80180	--
GLYMA_08G118500	1090	0.33	2.39667	6.33333	52.6667	2.93445	up	2.58927e-07	4.76192e-06	At1g29290	--
GLYMA_17G046000	1088	1.81333	5.48333	35.3333	119.333	1.65654	up	2.60854e-07	4.79476e-06	At5g20820	--
GLYMA_08G324300	6182	5.22333	1.95667	267.667	115	-1.34433	down	2.62297e-07	4.8187e-06	At4g26690	K01126 glycerophosphoryl diester phosphodiesterase [EC:3.1.4.46] | (RefSeq) putative glycerophosphoryl diester phosphodiesterase precursor (A)
GLYMA_12G093100	1788	156.567	73.97	5001	2703.33	-1.01362	down	2.65193e-07	4.86668e-06	At5g22250	K12581 CCR4-NOT transcription complex subunit 7/8 | (RefSeq) probable CCR4-associated factor 1 homolog 11 (A)
GLYMA_03G130700	841	1.12667	4.43667	17	76	2.05167	up	2.68312e-07	4.92126e-06	--	--
GLYMA_04G165400	4180	1.97	0.746667	135.667	57.3333	-1.3437	down	2.71998e-07	4.98619e-06	At1g74360	K13415 protein brassinosteroid insensitive 1 [EC:2.7.10.1 2.7.11.1] | (RefSeq) BRI1B; brassinosteroid receptor precursor (A)
GLYMA_16G161000	3761	1.07	2.83667	72	221.333	1.48628	up	2.74254e-07	5.02486e-06	At4g31980_2	--
GLYMA_04G118700	1089	853.677	1674.93	16627.3	37468.3	1.04182	up	2.7612e-07	5.05633e-06	At5g62350	K01051 pectinesterase [EC:3.1.1.11] | (RefSeq) pectinesterase/pectinesterase inhibitor (A)
GLYMA_02G125900	799	37.6533	14.78	537	241	-1.28045	down	2.78275e-07	5.09032e-06	--	--
GLYMA_19G170500	6537	24.09	10.56	1348.33	641.333	-1.14084	down	2.81838e-07	5.14999e-06	At2g20300	K13430 serine/threonine-protein kinase PBS1 [EC:2.7.11.1] | (RefSeq) serine/threonine-protein kinase (A)
GLYMA_13G001700	5127	0.266667	0.846667	24.3333	87	1.74159	up	2.87498e-07	5.2478e-06	At1g59720	K23541 Ca2+/H+ antiporter, TMEM165/GDT1 family | (RefSeq) putative pentatricopeptide repeat-containing protein At3g23330 (A)
GLYMA_14G179000	3512	5.11333	2.23333	219.333	107.333	-1.13277	down	2.93024e-07	5.34581e-06	At1g12680	K13412 calcium-dependent protein kinase [EC:2.7.11.1] | (RefSeq) calcium-dependent protein kinase SK5-like (A)
GLYMA_20G008400	499	7.06667	25.7	63	273.667	1.95172	up	2.94646e-07	5.37252e-06	--	--
GLYMA_06G081100	4015	0.743333	3.13333	25.6667	124	2.14556	up	2.96338e-07	5.40049e-06	At5g25610	--
GLYMA_16G200700	7579	0.203333	1.82	4	38.6667	3.20793	up	3.04331e-07	5.53731e-06	At2g45650	K09264 MADS-box transcription factor, plant | (RefSeq) uncharacterized protein LOC100779279 (A)
GLYMA_06G259400	11303	1.57333	0.386667	115.333	32.3333	-1.9458	down	3.1547e-07	5.73386e-06	At5g17680	K13457 disease resistance protein RPM1 | (RefSeq) disease resistance protein RPM1 (A)
GLYMA_15G232400	4466	3.19333	8.14333	233	671.667	1.41484	up	3.17755e-07	5.76925e-06	At5g17680	--
GLYMA_05G079800	5013	4.87	2	187.667	86.3333	-1.21733	down	3.20627e-07	5.81832e-06	At3g56850	K14432 ABA responsive element binding factor | (RefSeq) ABSCISIC ACID-INSENSITIVE 5-like protein 2 (A)
GLYMA_06G191400	9755	6.69	14.0267	426.667	990.667	1.12464	up	3.22775e-07	5.85417e-06	At3g47780	K05643 ATP-binding cassette, subfamily A (ABC1), member 3 | (RefSeq) ABC transporter A family member 1 (A)
GLYMA_11G132800	798	116.15	34.5267	1370.67	454.333	-1.69272	down	3.24796e-07	5.8877e-06	--	--
GLYMA_17G123800	6742	28.19	11.3233	2348	1036.67	-1.26479	down	3.29212e-07	5.96459e-06	At1g68710	K01530 phospholipid-translocating ATPase [EC:7.6.2.1] | (RefSeq) putative phospholipid-transporting ATPase 9 (A)
GLYMA_13G141900	2344	9.50667	19.3933	300.333	694.667	1.0924	up	3.3047e-07	5.98421e-06	At5g57620	K09422 transcription factor MYB, plant | (RefSeq) MYB/HD-like transcription factor (A)
GLYMA_09G256100	4034	6.51	2.90333	220.667	110.333	-1.10098	down	3.32352e-07	6.01509e-06	At3g61490	K01184 polygalacturonase [EC:3.2.1.15] | (RefSeq) LOW QUALITY PROTEIN: probable polygalacturonase At3g15720 (A)
GLYMA_16G087100	5306	27.2233	11.81	1758	860.333	-1.13842	down	3.33241e-07	6.02799e-06	At5g36930	K13457 disease resistance protein RPM1 | (RefSeq) disease resistance protein RPM1 (A)
GLYMA_20G063100	3562	2.35667	0.563333	62.3333	16.3333	-2.01908	down	3.41547e-07	6.17496e-06	At2g32270	K14709 solute carrier family 39 (zinc transporter), member 1/2/3 | (RefSeq) zinc transporter protein ZIP1 precursor (A)
GLYMA_16G053200	1732	2.61	0.653333	60	17	-1.92045	down	3.49912e-07	6.31617e-06	At3g26960	--
GLYMA_12G204500	1050	1.69667	5.71667	32	123.667	1.82987	up	3.53327e-07	6.37444e-06	At4g28310	--
GLYMA_18G236700	3912	9.07333	4.22667	324	167.667	-1.04465	down	3.54616e-07	6.39433e-06	At3g61490	K01184 polygalacturonase [EC:3.2.1.15] | (RefSeq) LOW QUALITY PROTEIN: probable polygalacturonase At3g15720 (A)
GLYMA_02G234200	4559	4.32	9.82	119.333	304	1.24599	up	3.55944e-07	6.41488e-06	At5g58390	K00430 peroxidase [EC:1.11.1.7] | (RefSeq) peroxidase 4 (A)
GLYMA_04G079300	1358	1.66667	5.97	40.3333	167	1.91277	up	3.57493e-07	6.4394e-06	--	--
GLYMA_12G205900	3814	7.66333	3.62667	247.333	131.333	-1.01354	down	3.60729e-07	6.49083e-06	At5g36160	K00815 tyrosine aminotransferase [EC:2.6.1.5] | (RefSeq) nicotianamine aminotransferase 1 (A)
GLYMA_07G013700	5225	0.616667	0.08	34.6667	5	-2.88248	down	3.67688e-07	6.60909e-06	At1g51800	K13430 serine/threonine-protein kinase PBS1 [EC:2.7.11.1] | (RefSeq) probable serine/threonine-protein kinase PBL7 isoform X1 (A)
GLYMA_16G144100	1102	0.1	1.72667	2	37	4.14422	up	3.68214e-07	6.61506e-06	--	--
GLYMA_07G262500	1783	104.64	45.0567	2557.67	1269	-1.14149	down	3.84581e-07	6.90547e-06	At1g62280	--
GLYMA_11G199700	4662	11.1933	5.29333	596.333	309	-1.03059	down	3.88063e-07	6.96434e-06	At5g58300	K13415 protein brassinosteroid insensitive 1 [EC:2.7.10.1 2.7.11.1] | (RefSeq) BRI1B; brassinosteroid receptor precursor (A)
GLYMA_13G208000	1890	25.72	57.3367	871.333	2153	1.21178	up	3.88912e-07	6.97591e-06	At1g03230	--
GLYMA_18G263500	2610	1.5	3.37333	70	173.667	1.22648	up	3.91488e-07	7.01842e-06	At3g29230	K23541 Ca2+/H+ antiporter, TMEM165/GDT1 family | (RefSeq) putative pentatricopeptide repeat-containing protein At3g23330 (A)
GLYMA_02G049700	8399	5.41	12.05	233.333	570.333	1.20691	up	3.9245e-07	7.03199e-06	At1g19860	--
GLYMA_20G018800	2245	1.00333	2.73667	40.3333	124.333	1.51419	up	3.94577e-07	7.06587e-06	At1g64950	K24184 cytochrome P450 family 89 subfamily A [EC:1.14.-.-] | (RefSeq) cytochrome P450 89A2 (A)
GLYMA_12G198600	2983	0.456667	1.4	24.3333	83.3333	1.67707	up	3.94755e-07	7.06587e-06	At2g19130	K13416 brassinosteroid insensitive 1-associated receptor kinase 1 [EC:2.7.10.1 2.7.11.1] | (RefSeq) somatic embryogenesis receptor-like kinase-like protein precursor (A)
GLYMA_01G112200	9781	2.43333	0.936667	178	78.3333	-1.30245	down	3.96632e-07	7.09575e-06	At5g36930	K13457 disease resistance protein RPM1 | (RefSeq) disease resistance protein RPM1 (A)
GLYMA_09G049100	2018	235.623	102.457	7770	3896.33	-1.13071	down	3.99649e-07	7.14224e-06	At4g37360	K13260 isoflavone/4'-methoxyisoflavone 2'-hydroxylase [EC:1.14.14.90 1.14.14.89] | (RefSeq) CYP81E11; isoflavone 2'-hydroxylase-like (A)
GLYMA_02G094500	859	36.1233	91.9633	555	1659	1.42752	up	4.02631e-07	7.19176e-06	At2g37430	--
GLYMA_16G208400	12078	2.49667	1.16333	268.333	140.333	-1.04097	down	4.07501e-07	7.27495e-06	At5g49890	K05016 chloride channel 7 | (RefSeq) chloride channel protein CLC-c isoform X1 (A)
GLYMA_18G083700	2129	0.603333	2.25	18.3333	79	1.97908	up	4.20184e-07	7.49744e-06	At3g07040	K13457 disease resistance protein RPM1 | (RefSeq) disease resistance protein (A)
GLYMA_13G218800	2667	11.0367	21.2533	526.667	1156	1.01465	up	4.20782e-07	7.5042e-06	At1g30090	--
GLYMA_19G016600	7420	7.88333	3.06333	552.667	239.667	-1.30134	down	4.22576e-07	7.53227e-06	At3g28345	K05658 ATP-binding cassette, subfamily B (MDR/TAP), member 1 [EC:7.6.2.2] | (RefSeq) ABC transporter B family member 15 isoform X1 (A)
GLYMA_14G078800	7662	1.75333	3.86	93	225.667	1.19532	up	4.27331e-07	7.61305e-06	At3g13690	K13430 serine/threonine-protein kinase PBS1 [EC:2.7.11.1] | (RefSeq) probable serine/threonine-protein kinase PBL7 isoform X1 (A)
GLYMA_06G004300	985	2.44	6.96333	43	142	1.59031	up	4.2933e-07	7.64069e-06	At4g34950	--
GLYMA_17G188800	4876	6.35667	15.12	123	336.667	1.32811	up	4.33006e-07	7.70209e-06	At5g10580	--
GLYMA_08G128100	1164	40.3	10.3167	561.333	172.333	-1.87565	down	4.402e-07	7.81785e-06	At2g02850	--
GLYMA_U035800	2343	0.3	2.68	4.66667	47.6667	3.21072	up	4.43052e-07	7.86441e-06	At4g20970	--
GLYMA_17G201100	8132	5.82	2.60667	207.333	104.667	-1.08968	down	4.50673e-07	7.99137e-06	At2g24330_2	K23292 endoplasmic reticulum junction formation protein lunapark | (RefSeq) uncharacterized protein At2g24330 (A)
GLYMA_16G009000	1584	5.8	13.0833	164.333	428	1.24796	up	4.62377e-07	8.19466e-06	At1g72510	--
GLYMA_17G013200	6429	1.62333	3.56667	74.3333	185	1.20741	up	4.69618e-07	8.31867e-06	At1g05170	K20855 beta-1,3-galactosyltransferase 1/2/3/4/5/7/8 [EC:2.4.1.-] | (RefSeq) probable beta-1,3-galactosyltransferase 2 (A)
novel.1348	568	0.756667	5.17	7.66667	62.6667	2.86504	up	4.73547e-07	8.38392e-06	--	--
GLYMA_20G237200	2100	21.86	6.33667	333	113.333	-1.69627	down	4.80005e-07	8.49385e-06	At1g56220	--
GLYMA_03G007700	1855	10.06	3.99667	215.667	93.3333	-1.28632	down	4.81556e-07	8.51688e-06	At4g26010	K00430 peroxidase [EC:1.11.1.7] | (RefSeq) peroxidase 44 (A)
GLYMA_09G058900	6683	37.8533	18.0367	1149	607.667	-1.01651	down	4.82946e-07	8.53705e-06	At5g57240	K22285 oxysterol-binding protein-related protein 8 | (RefSeq) oxysterol-binding protein-related protein 4C isoform X1 (A)
GLYMA_01G179000	2724	5.04333	1.79	245.333	100.333	-1.41878	down	4.86288e-07	8.59168e-06	At2g23770	K13429 chitin elicitor receptor kinase 1 | (RefSeq) chitin elicitor receptor kinase 1 (A)
GLYMA_16G031900	2045	21.11	40.9267	574.333	1265.33	1.0202	up	4.86752e-07	8.59542e-06	At4g01250	K13425 WRKY transcription factor 22 | (RefSeq) WRKY transcription factor 22 (A)
GLYMA_09G185500	1355	0.0533333	1.18	1.33333	33	4.50242	up	4.90608e-07	8.65905e-06	--	--
GLYMA_11G055100	1317	11.11	3.54667	262	94.6667	-1.58134	down	4.99049e-07	8.78079e-06	At3g50310	K20716 mitogen-activated protein kinase kinase kinase 17/18 | (RefSeq) mitogen-activated protein kinase kinase kinase 18 (A)
GLYMA_08G277100	4382	4.05	1.49333	203.333	86.3333	-1.36238	down	4.99328e-07	8.78119e-06	At4g15560	K01662 1-deoxy-D-xylulose-5-phosphate synthase [EC:2.2.1.7] | (RefSeq) probable 1-deoxy-D-xylulose-5-phosphate synthase 2, chloroplastic (A)
GLYMA_09G198900	981	1.38333	4.52333	24.3333	91.3333	1.78291	up	5.00869e-07	8.80374e-06	At1g58170	K25075 pterocarpan synthase [EC:4.2.1.139] | (RefSeq) PTS3; pterocarpan synthase precursor (A)
GLYMA_04G090100	2026	0.193333	1.77667	5.33333	52	3.23664	up	5.02009e-07	8.81925e-06	At5g65640	K13422 transcription factor MYC2 | (RefSeq) transcription factor MYC1 (A)
novel.548	659	0.11	2.47667	1.33333	34	4.5439	up	5.06574e-07	8.89486e-06	--	--
GLYMA_03G022800	645	10.6233	36.6933	122.667	504.667	1.87304	up	5.09412e-07	8.93551e-06	At1g24620	K13448 calcium-binding protein CML | (RefSeq) probable calcium-binding protein CML25 (A)
GLYMA_18G056600	3589	9.72667	4.10667	410.333	194.333	-1.18186	down	5.13639e-07	9.00503e-06	At2g38470	K13424 WRKY transcription factor 33 | (RefSeq) WRKY62; WRKY transcription factor 62 (A)
GLYMA_10G023500	4643	8.43667	3.76	326	163	-1.09868	down	5.18433e-07	9.08385e-06	At2g48030	--
GLYMA_07G260700	2228	2.20333	0.683333	88	30.6667	-1.62188	down	5.18667e-07	9.08385e-06	At4g04630	--
GLYMA_17G168400	5705	8.52	3.76	322.333	156	-1.12887	down	5.23779e-07	9.15461e-06	At5g67230	K20871 putative beta-1,4-xylosyltransferase IRX14 [EC:2.4.2.-] | (RefSeq) beta-1,4-xylosyltransferase IRX14 isoform X2 (A)
GLYMA_08G171400	889	11.9067	32.49	121.667	381.667	1.5144	up	5.28462e-07	9.23173e-06	--	--
GLYMA_05G190300	2853	2.83333	6.92	115.333	306.667	1.33484	up	5.3566e-07	9.3527e-06	At5g09760	K01051 pectinesterase [EC:3.1.1.11] | (RefSeq) pectinesterase (A)
GLYMA_03G168100	9988	0.07	0.51	4.66667	38	2.91699	up	5.39014e-07	9.40644e-06	At1g15520	K05681 ATP-binding cassette, subfamily G (WHITE), member 2 | (RefSeq) ABC transporter G family member 21 (A)
GLYMA_06G059500	1036	0.123333	1.57	2.33333	32	3.69992	up	5.39913e-07	9.41731e-06	At5g24920	--
GLYMA_18G084400	3779	0.376667	1.61333	25.3333	126.667	2.19053	up	5.40504e-07	9.42281e-06	At3g07040	K13457 disease resistance protein RPM1 | (RefSeq) disease resistance protein RPM1 (A)
GLYMA_16G121700	5793	0.0666667	1.27	1.33333	29.3333	4.37322	up	5.51479e-07	9.60433e-06	At1g20270	K00472 prolyl 4-hydroxylase [EC:1.14.11.2] | (RefSeq) prolyl 4-hydroxylase subunit alpha-1-like (A)
GLYMA_06G109200	4681	4.6	14.9033	257.667	892.667	1.7307	up	5.52348e-07	9.61458e-06	At1g77760_1	K10534 nitrate reductase (NAD(P)H) [EC:1.7.1.1 1.7.1.2 1.7.1.3] | (RefSeq) INR2; inducible nitrate reductase [NADH] 2 (A)
GLYMA_15G073200	1339	84.8333	172.683	1628.33	3823	1.09685	up	5.53485e-07	9.62404e-06	At3g05500	--
GLYMA_20G094500	2139	5.76667	16.82	169	566.667	1.6119	up	5.53737e-07	9.62404e-06	At1g56600	K18819 inositol 3-alpha-galactosyltransferase [EC:2.4.1.123] | (RefSeq) galactinol synthase 2 (A)
GLYMA_17G127600	519	1.04	4.85667	9.66667	51.6667	2.29674	up	5.57721e-07	9.68342e-06	--	--
GLYMA_09G038600	6720	12.9333	5.29	632	278.333	-1.24484	down	5.73228e-07	9.94256e-06	At5g49360	K15920 xylan 1,4-beta-xylosidase [EC:3.2.1.37] | (RefSeq) beta-xylosidase/alpha-L-arabinofuranosidase 2 isoform X1 (A)
GLYMA_07G232500	12264	4.18667	11.0633	141.333	405.667	1.44887	up	5.77694e-07	1.00149e-05	At5g12170	--
GLYMA_06G213000	1720	2.85667	7.17	87.6667	252	1.39559	up	5.83626e-07	1.01075e-05	At5g19970	--
GLYMA_03G078600	4357	1.71667	4.75333	60	184.667	1.52603	up	5.87183e-07	1.01639e-05	At2g38110	K13508 glycerol-3-phosphate acyltransferase [EC:2.3.1.15 2.3.1.198] | (RefSeq) glycerol-3-phosphate 2-O-acyltransferase 6 (A)
GLYMA_13G305600	1651	7.13	15.45	149.333	363	1.17367	up	5.8773e-07	1.01683e-05	At2g32300	--
GLYMA_11G077400	1136	119.513	249.74	2430	5878.67	1.13866	up	5.99949e-07	1.03639e-05	At4g36040	K03686 molecular chaperone DnaJ | (RefSeq) chaperone protein DnaJ (A)
GLYMA_13G094900	1585	15.89	30.4067	376	817	1.0045	up	6.06476e-07	1.04714e-05	At5g57560	K14504 xyloglucan:xyloglucosyl transferase TCH4 [EC:2.4.1.207] | (RefSeq) xyloglucan endotransglucosylase/hydrolase protein 22 (A)
GLYMA_11G003500	3022	12.8	5.68667	423.333	213.667	-1.1052	down	6.07003e-07	1.04752e-05	At5g54810	K01696 tryptophan synthase beta chain [EC:4.2.1.20] | (RefSeq) TSB; tryptophan synthase beta subunit (A)
GLYMA_04G222500	1679	4.36333	1.69	131.333	56.3333	-1.31353	down	6.1434e-07	1.05964e-05	At5g05250	--
GLYMA_08G323400	1468	5.09333	2.01333	133.667	60	-1.26713	down	6.14914e-07	1.0601e-05	At5g55380	--
GLYMA_08G062700	2650	10.12	3.98667	394.667	177.333	-1.27869	down	6.28629e-07	1.0832e-05	At5g48380	K13415 protein brassinosteroid insensitive 1 [EC:2.7.10.1 2.7.11.1] | (RefSeq) BRI1A; brassinosteroid receptor precursor (A)
GLYMA_01G081300	5213	15.1133	5.58	809	317.667	-1.39823	down	6.36953e-07	1.09643e-05	At1g68560	K15925 alpha-D-xyloside xylohydrolase [EC:3.2.1.177] | (RefSeq) alpha-xylosidase 1 (A)
GLYMA_02G239100	1102	11.08	4.16	218	94.3333	-1.33693	down	6.45673e-07	1.11088e-05	At5g36970	--
GLYMA_04G032800	1259	10.1767	24.19	197.333	543	1.32098	up	6.49822e-07	1.1169e-05	At5g65650	--
GLYMA_05G150100	533	40.28	18.3233	384	199.667	-1.0646	down	6.50305e-07	1.11716e-05	At3g57450	--
GLYMA_05G188500	2891	4.32667	1.60333	132.667	56	-1.35469	down	6.68293e-07	1.14576e-05	At3g27740	K01956 carbamoyl-phosphate synthase small subunit [EC:6.3.5.5] | (RefSeq) carbamoyl-phosphate synthase small chain, chloroplastic isoform X1 (A)
GLYMA_07G009100	3437	1.96333	0.65	98.6667	36	-1.54591	down	6.71653e-07	1.15094e-05	At1g55110	--
GLYMA_06G155100	4201	3.17333	7.17667	64	163.333	1.24293	up	6.72588e-07	1.15197e-05	At5g63970	K16280 E3 ubiquitin-protein ligase RGLG [EC:2.3.2.27] | (RefSeq) LOW QUALITY PROTEIN: E3 ubiquitin-protein ligase RGLG3 (A)
GLYMA_16G170000	1108	22.2	9.70333	440.667	219.333	-1.1231	down	6.77252e-07	1.15937e-05	--	--
GLYMA_17G038000	2754	14.1267	26.9667	555.333	1215	1.00564	up	6.8236e-07	1.16695e-05	At1g48040	K14803 protein phosphatase PTC2/3 [EC:3.1.3.16] | (RefSeq) probable protein phosphatase 2C 47 (A)
GLYMA_08G297400	4295	13.5633	6.29333	761.333	384	-1.06219	down	6.90121e-07	1.17904e-05	At1g14390	K13415 protein brassinosteroid insensitive 1 [EC:2.7.10.1 2.7.11.1] | (RefSeq) BRI1A; brassinosteroid receptor precursor (A)
GLYMA_05G196500	5298	4.41667	1.78333	154.333	69.6667	-1.25161	down	6.91372e-07	1.18059e-05	At2g38290	K03320 ammonium transporter, Amt family | (RefSeq) AMT3.1; ammonium transporter 3 member 1 (A)
GLYMA_08G326300	3861	1.04	0.296667	72	23	-1.7472	down	6.93978e-07	1.18444e-05	At3g13080	K05666 ATP-binding cassette, subfamily C (CFTR/MRP), member 2 | (RefSeq) ABC transporter C family member 3 isoform X1 (A)
GLYMA_07G218000	6620	2.43667	6.32333	46.3333	132.667	1.43195	up	6.9817e-07	1.191e-05	At2g01430	K09338 homeobox-leucine zipper protein | (RefSeq) homeobox-leucine zipper protein HOX3 isoform X2 (A)
GLYMA_20G231000	3668	0.656667	1.90333	25.3333	82.6667	1.60417	up	6.99755e-07	1.19311e-05	At3g05140	K13430 serine/threonine-protein kinase PBS1 [EC:2.7.11.1] | (RefSeq) serine/threonine protein kinase (A)
GLYMA_03G196000	3674	1.32667	2.75	87.3333	203.667	1.11487	up	7.04403e-07	1.20044e-05	At2g36240	--
GLYMA_08G200200	3336	23.4067	65.0667	461.333	1481.33	1.54303	up	7.18708e-07	1.22421e-05	At4g25150	K12742 isoprene synthase [EC:4.2.3.27] | (RefSeq) TPS9; tricyclene synthase EBOS, chloroplastic (A)
GLYMA_08G365100	1870	94.8	232.803	3010.67	8430.67	1.36033	up	7.34428e-07	1.24911e-05	At3g02550	--
GLYMA_07G133000	5414	0.29	0.976667	19.6667	74.3333	1.81781	up	7.41444e-07	1.25979e-05	At1g07540	--
GLYMA_02G046600	7101	1.76333	0.576667	134	47.3333	-1.57482	down	7.48182e-07	1.26998e-05	At2g17820	K14489 arabidopsis histidine kinase 2/3/4 (cytokinin receptor) [EC:2.7.13.3] | (RefSeq) histidine kinase 3 (A)
GLYMA_02G121900	3021	0.8	2.44667	43.3333	153	1.68624	up	7.56429e-07	1.28334e-05	At3g51550	K13430 serine/threonine-protein kinase PBS1 [EC:2.7.11.1] | (RefSeq) serine/threonine-protein kinase (A)
GLYMA_06G320600	3636	1.81	0.54	117.667	38	-1.70036	down	7.6205e-07	1.29095e-05	At3g13380	K13415 protein brassinosteroid insensitive 1 [EC:2.7.10.1 2.7.11.1] | (RefSeq) BRI1B; brassinosteroid receptor precursor (A)
GLYMA_08G295600	1435	4.29	12.2867	70.6667	231	1.57981	up	7.64236e-07	1.29337e-05	At5g39950	K03671 thioredoxin 1 | (RefSeq) uncharacterized protein LOC100527572 (A)
GLYMA_18G297100	1449	238.483	612.587	5717.33	16877.3	1.42747	up	7.67054e-07	1.2975e-05	At3g02550	K13945 LOB domain-containing protein 29 | (RefSeq) LOB domain-containing protein 33 (A)
GLYMA_03G240000	2815	1.3	3.15333	50.3333	136.333	1.33572	up	7.68803e-07	1.29981e-05	At1g72210	K20558 transcription factor SPEECHLESS | (RefSeq) SPCH3; transcription factor SPEECHLESS (A)
GLYMA_01G130500	2056	5.98667	2.06667	134	53.3333	-1.45347	down	7.70525e-07	1.30208e-05	At5g05340	K00430 peroxidase [EC:1.11.1.7] | (RefSeq) peroxidase P7 (A)
GLYMA_01G064900	5426	2.89333	5.79667	232.333	512.333	1.05844	up	7.71869e-07	1.3037e-05	At2g03810	--
GLYMA_14G139400	3624	2.86667	7.63667	58.6667	178.667	1.48451	up	7.76627e-07	1.31109e-05	At5g10580	--
GLYMA_08G049000	7363	11.8867	5.60333	1048	538.333	-1.03534	down	7.78024e-07	1.3128e-05	At5g35750	K14489 arabidopsis histidine kinase 2/3/4 (cytokinin receptor) [EC:2.7.13.3] | (RefSeq) histidine kinase 4 (A)
GLYMA_06G254300	3710	2.17333	4.60333	140.667	326.667	1.13086	up	7.88376e-07	1.32764e-05	At3g14470	K13457 disease resistance protein RPM1 | (RefSeq) disease resistance protein RPM1 (A)
GLYMA_10G029600	2695	1	0.143333	41	6.66667	-2.71397	down	7.8987e-07	1.3295e-05	At3g22830	K09419 heat shock transcription factor, other eukaryote | (RefSeq) HSF-21; heat stress transcription factor 21 (A)
GLYMA_13G071900	5362	3.30667	1.55333	316.667	167.667	-1.02432	down	8.25075e-07	1.38603e-05	At3g14470	K13457 disease resistance protein RPM1 | (RefSeq) disease resistance protein RPM1 (A)
GLYMA_16G196300	1503	1.90333	7.22667	34.6667	156.667	2.01437	up	8.35776e-07	1.40263e-05	At5g03840	K06910 phosphatidylethanolamine-binding protein | (RefSeq) BFT; phosphatidylethanolamine-binding protein BFT (A)
GLYMA_13G047300	2581	302.54	142.577	9035.33	4717.33	-1.02998	down	8.44181e-07	1.41465e-05	At3g25780	K10525 allene oxide cyclase [EC:5.3.99.6] | (RefSeq) AOC4; allene oxide cyclase 3, chloroplastic-like (A)
GLYMA_20G123500	4529	4.97333	2.10667	173.333	80.3333	-1.1916	down	8.54206e-07	1.43074e-05	At1g15170	K03327 multidrug resistance protein, MATE family | (RefSeq) protein DETOXIFICATION 12 isoform X1 (A)
GLYMA_16G157400	3424	8.17333	3.68	500.333	249.333	-1.0949	down	8.58983e-07	1.43733e-05	At1g34300	K13418 somatic embryogenesis receptor kinase 1 [EC:2.7.10.1 2.7.11.1] | (RefSeq) somatic embryogenesis receptor kinase 2 (A)
GLYMA_17G034800	7781	25.9567	11.44	1489.67	752.333	-1.10587	down	8.62643e-07	1.44275e-05	At4g16170	--
GLYMA_09G027500	3241	2.47333	0.803333	118.667	43.3333	-1.55799	down	8.91321e-07	1.48853e-05	At1g16260	K13418 somatic embryogenesis receptor kinase 1 [EC:2.7.10.1 2.7.11.1] | (RefSeq) somatic embryogenesis receptor kinase 2 (A)
GLYMA_17G163000	2425	2.15	0.586667	93	29.6667	-1.78333	down	9.00308e-07	1.50207e-05	At4g33890	--
GLYMA_10G274000	1937	45.7533	94.6367	1415.33	3389.67	1.12257	up	9.01318e-07	1.50302e-05	At1g68490	--
GLYMA_11G225200	3680	2.44667	0.753333	103.333	34.3333	-1.66216	down	9.02452e-07	1.50417e-05	At5g05940	--
GLYMA_16G156100	6054	2.48	1.03667	149.667	69.3333	-1.20076	down	9.04705e-07	1.50646e-05	At1g34420	K00924 kinase [EC:2.7.1.-] | (RefSeq) NARK; nodule autoregulation receptor kinase precursor (A)
GLYMA_12G224300	1431	0.91	2.99333	23.3333	88.3333	1.79498	up	9.05801e-07	1.50712e-05	--	--
GLYMA_10G010400	1651	15.0133	6.03333	379.667	173.667	-1.25041	down	9.06436e-07	1.50714e-05	At5g49620	K09422 transcription factor MYB, plant | (RefSeq) transcription factor MYB78 (A)
GLYMA_18G022900	993	2.40333	7.30333	35.6667	125.667	1.6814	up	9.34688e-07	1.55336e-05	At5g19090	K07213 copper chaperone | (RefSeq) copper transport protein ATX1 (A)
GLYMA_01G025300	2783	2.73667	0.936667	90.3333	34.6667	-1.4851	down	9.36632e-07	1.55583e-05	At1g67900	--
GLYMA_07G211500	4349	1.31333	7.07667	14.6667	93	2.51643	up	9.45848e-07	1.57037e-05	At1g49670_2	K00344 NADPH:quinone reductase [EC:1.6.5.5] | (RefSeq) quinone oxidoreductase-like protein 2 homolog (A)
GLYMA_19G196400	1500	8.81	3.06	235.667	94	-1.45068	down	9.52489e-07	1.57986e-05	At2g27310	--
GLYMA_02G268200	1845	16.76	7.52	423.667	218	-1.08075	down	9.60694e-07	1.5927e-05	At1g05010	K05933 aminocyclopropanecarboxylate oxidase [EC:1.14.17.4] | (RefSeq) uncharacterized protein LOC100815336 (A)
GLYMA_01G093100	5401	31.7167	15	1653	856	-1.02789	down	9.62559e-07	1.59502e-05	At1g68690	K13430 serine/threonine-protein kinase PBS1 [EC:2.7.11.1] | (RefSeq) serine/threonine-protein kinase PBS1 isoform X2 (A)
GLYMA_06G060600	5516	1.39333	3.12	58.3333	144.667	1.22155	up	9.6688e-07	1.6014e-05	At2g24960	--
GLYMA_14G046100	4726	3.75	7.76667	152.667	353.667	1.11277	up	9.77825e-07	1.61874e-05	At4g15420_2	K14016 ubiquitin fusion degradation protein 1 | (RefSeq) ubiquitin fusion degradation protein 1 homolog (A)
GLYMA_18G205500	3570	0.0966667	0.616667	6.33333	42.3333	2.67988	up	9.81018e-07	1.62324e-05	At3g11080	--
GLYMA_10G059700	897	4.78	10.95	76.6667	196.333	1.25421	up	9.85816e-07	1.63039e-05	At2g28200	--
GLYMA_09G065400	725	0.696667	4.88667	5.66667	42.3333	2.84172	up	1.00763e-06	1.66567e-05	--	--
GLYMA_05G241600	8011	10.22	4.72667	922.333	464	-1.06146	down	1.01142e-06	1.67112e-05	At5g35750	K14489 arabidopsis histidine kinase 2/3/4 (cytokinin receptor) [EC:2.7.13.3] | (RefSeq) histidine kinase 4 (A)
GLYMA_20G196800	1272	0.276667	2.19667	4.33333	38.6667	3.05122	up	1.01859e-06	1.68215e-05	At2g32300	--
GLYMA_03G116100	2615	3.89333	1.43667	115.333	46.6667	-1.39362	down	1.02951e-06	1.69936e-05	At4g01070	K08237 hydroquinone glucosyltransferase [EC:2.4.1.218] | (RefSeq) hydroquinone glucosyltransferase (A)
GLYMA_03G030500	1111	33.2933	12.3133	662	260.667	-1.39708	down	1.03036e-06	1.69994e-05	--	--
GLYMA_09G029800	4196	5.35333	10.6233	257	561.333	1.04193	up	1.03756e-06	1.71099e-05	At1g30650	K13425 WRKY transcription factor 22 | (RefSeq) WRKY transcription factor 22 (A)
GLYMA_13G222800	8593	3.63	1.47333	181.667	81.6667	-1.24264	down	1.04119e-06	1.71616e-05	At5g45650	--
GLYMA_10G230200	1937	3.73	1.03	114.333	37	-1.76333	down	1.04676e-06	1.7245e-05	At5g52830	K13425 WRKY transcription factor 22 | (RefSeq) probable WRKY transcription factor 27 (A)
GLYMA_18G257900	3317	0.18	1.13333	5.66667	40.6667	2.721	up	1.05501e-06	1.73726e-05	At3g49190	--
GLYMA_13G361900	6668	68.5433	132.55	6253.33	13475.7	1.00829	up	1.08397e-06	1.7815e-05	At1g15520	K05681 ATP-binding cassette, subfamily G (WHITE), member 2 | (RefSeq) ABC transporter G family member 9 (A)
GLYMA_09G275300	2329	0.57	1.83667	23.6667	86.3333	1.75308	up	1.08513e-06	1.78256e-05	At5g01880	K19040 E3 ubiquitin-protein ligase ATL10/75/76/77/78 [EC:2.3.2.27] | (RefSeq) RING-H2 finger protein (A)
GLYMA_06G323100	3329	3.38667	1.11	104	37.6667	-1.56144	down	1.08796e-06	1.78549e-05	At1g71380	K01179 endoglucanase [EC:3.2.1.4] | (RefSeq) endoglucanase 9 (A)
GLYMA_16G153700	2053	8.33	19.9667	212.667	595.667	1.34162	up	1.08913e-06	1.78654e-05	At5g18130	K00640 serine O-acetyltransferase [EC:2.3.1.30] | (RefSeq) serine acetyltransferase 3, mitochondrial (A)
GLYMA_19G198000	2572	7.03	2.71667	146.333	64.6667	-1.29678	down	1.09045e-06	1.78785e-05	At5g42560	K17338 receptor expression-enhancing protein 1/2/3/4 | (RefSeq) HVA22-like protein j (A)
GLYMA_05G042300	2676	2.10333	0.743333	100.667	40.3333	-1.42687	down	1.09582e-06	1.79581e-05	At4g24730	K01517 manganese-dependent ADP-ribose/CDP-alcohol diphosphatase [EC:3.6.1.13 3.6.1.16 3.6.1.53] | (RefSeq) manganese-dependent ADP-ribose/CDP-alcohol diphosphatase (A)
GLYMA_09G197200	5055	1.11667	0.216667	58.3333	12.6667	-2.3062	down	1.09676e-06	1.79648e-05	At1g42540	K05387 glutamate receptor, ionotropic, plant | (RefSeq) glutamate receptor 3.6 (A)
GLYMA_10G027900	1867	1.12333	2.91333	35.3333	102.667	1.44008	up	1.09756e-06	1.79693e-05	At3g22550	--
GLYMA_20G157100	853	3.81667	0.736667	58	13	-2.28552	down	1.10269e-06	1.80446e-05	At5g52190	--
GLYMA_15G189700	911	0.33	2.43333	5.33333	46.3333	2.97391	up	1.10727e-06	1.81023e-05	At4g24130	--
GLYMA_11G142200	778	1.25	5.23	17.3333	81.3333	2.12584	up	1.12778e-06	1.8411e-05	--	--
GLYMA_09G184100	2874	1.10333	3.06667	34	107.667	1.5451	up	1.13469e-06	1.8515e-05	At3g18400	--
GLYMA_16G100400	3616	17.5867	37.99	963.667	2405	1.18359	up	1.15101e-06	1.87634e-05	At2g02100	--
GLYMA_05G240500	2856	4.06667	7.82	145.667	311.667	1.00126	up	1.1595e-06	1.88906e-05	At1g67970	K09419 heat shock transcription factor, other eukaryote | (RefSeq) HSF-14; heat stress transcription factor 14 (A)
GLYMA_12G154500	1351	3.65667	8.80667	88.3333	246.667	1.34645	up	1.17936e-06	1.9198e-05	--	--
GLYMA_04G085800	962	0.483333	2.56667	8.33333	51.3333	2.49207	up	1.18984e-06	1.93502e-05	At4g32860	--
GLYMA_06G262100	6795	6.29667	2.45333	316.333	142	-1.27962	down	1.20661e-06	1.96043e-05	At4g21380	K13416 brassinosteroid insensitive 1-associated receptor kinase 1 [EC:2.7.10.1 2.7.11.1] | (RefSeq) BRASSINOSTEROID INSENSITIVE 1-associated receptor kinase 1 (A)
GLYMA_07G038600	1157	19.6967	8.48667	407.667	196	-1.15269	down	1.20853e-06	1.96261e-05	At1g72610	--
GLYMA_07G198200	5605	1.65	0.586667	145.333	56	-1.44979	down	1.21058e-06	1.965e-05	At1g28260	K14409 protein SMG7 | (RefSeq) protein SMG7 (A)
GLYMA_13G112200	1410	61.1533	128.83	1366	3264.33	1.13664	up	1.21962e-06	1.97859e-05	At5g20700	--
GLYMA_08G109400	3477	38	17.0533	2279.67	1158.33	-1.09406	down	1.22457e-06	1.98393e-05	At5g13930	K00660 chalcone synthase [EC:2.3.1.74] | (RefSeq) CHS1; chalcone synthase 1 (A)
GLYMA_10G023400	3237	2.89	1.13	151.333	66	-1.29295	down	1.22577e-06	1.98495e-05	At2g48010	K13416 brassinosteroid insensitive 1-associated receptor kinase 1 [EC:2.7.10.1 2.7.11.1] | (RefSeq) BRASSINOSTEROID INSENSITIVE 1-associated receptor kinase 1 (A)
GLYMA_07G125600	1377	55.81	111.797	1043.67	2405	1.07288	up	1.23734e-06	2.00178e-05	At5g56550	--
GLYMA_06G215200	6033	1.58	0.346667	58.3333	13.6667	-2.16694	down	1.25562e-06	2.0304e-05	At2g26710	K15639 PHYB activation tagged suppressor 1 [EC:1.14.-.-] | (RefSeq) cytochrome P450 734A1 (A)
GLYMA_02G186600	7220	0.02	0.483333	1	28	4.7202	up	1.26061e-06	2.03749e-05	At2g41540	K00006 glycerol-3-phosphate dehydrogenase (NAD+) [EC:1.1.1.8] | (RefSeq) probable glycerol-3-phosphate dehydrogenase [NAD(+)] 1, cytosolic (A)
GLYMA_11G215700	2032	1.26	3.69333	27	90.3333	1.62485	up	1.28363e-06	2.07275e-05	At2g01670	K07766 diphosphoinositol-polyphosphate diphosphatase [EC:3.6.1.52] | (RefSeq) nudix hydrolase family protein (A)
GLYMA_13G222100	4709	6.84667	18.3767	165.333	522	1.50658	up	1.28575e-06	2.07421e-05	At1g17020	K05278 flavonol synthase [EC:1.14.20.6] | (RefSeq) flavonol synthase/flavanone 3-hydroxylase (A)
GLYMA_03G232500	3236	3.64333	7.28333	148	328.667	1.05572	up	1.28886e-06	2.07825e-05	At5g57580	--
GLYMA_18G205800	2974	38.54	78.75	769.667	1787.33	1.09765	up	1.29246e-06	2.08306e-05	At5g01600	K00522 ferritin heavy chain [EC:1.16.3.2] | (RefSeq) H-1; ferritin-1, chloroplastic precursor (A)
GLYMA_09G284700	1644	2.34	0.546667	56.3333	15	-2.0219	down	1.31712e-06	2.12181e-05	At4g11290	K00430 peroxidase [EC:1.11.1.7] | (RefSeq) peroxidase 5 (A)
GLYMA_02G260800	819	500.057	1039.18	6536.33	15761.3	1.12908	up	1.32701e-06	2.13672e-05	At2g41430	--
GLYMA_14G067500	1125	2.69333	7.04667	54.3333	159.333	1.44952	up	1.3339e-06	2.1458e-05	--	--
GLYMA_01G157700	7169	0.453333	1.22667	37	112	1.48942	up	1.34127e-06	2.15664e-05	At5g65980	K24139 auxin efflux carrier family protein | (RefSeq) protein PIN-LIKES 7 (A)
GLYMA_02G168000	7354	3.06667	0.89	82	25.3333	-1.76272	down	1.34231e-06	2.1573e-05	At3g11950	K12501 homogentisate solanesyltransferase [EC:2.5.1.117] | (RefSeq) VTE2-2; homogentisate phytyltransferase VTE2-2 (A)
GLYMA_01G009900	4322	2.45333	5.05333	79.6667	185.667	1.11127	up	1.35204e-06	2.17089e-05	At1g32080	--
GLYMA_02G111200	3567	0.32	1.14333	19	76.6667	1.89679	up	1.36003e-06	2.18269e-05	--	--
GLYMA_17G147500	2748	95.32	39.76	1935.67	920	-1.19509	down	1.36194e-06	2.18371e-05	At4g17030	K20628 expansin | (RefSeq) EXPB8; expansin-B3-like precursor (A)
GLYMA_13G092100	6038	1.11	2.18667	120	265.333	1.03614	up	1.36519e-06	2.1879e-05	At4g33300	K14213 Xaa-Pro dipeptidase [EC:3.4.13.9] | (RefSeq) probable Xaa-Pro aminopeptidase pepP (A)
GLYMA_05G136100	2654	17.79	5.77333	587.667	221.667	-1.55095	down	1.38256e-06	2.21366e-05	At2g02010	K01580 glutamate decarboxylase [EC:4.1.1.15] | (RefSeq) uncharacterized protein LOC100812201 (A)
GLYMA_06G194600	1026	1.45667	6.87667	15.3333	83.3333	2.30323	up	1.40021e-06	2.23982e-05	--	--
GLYMA_18G091600	1567	10.53	20.98	295.667	668.667	1.06096	up	1.40261e-06	2.24259e-05	At1g50640	K09286 EREBP-like factor | (RefSeq) ethylene-responsive transcription factor 7 (A)
GLYMA_06G079200	1086	7.22	17.0367	140.333	385.333	1.318	up	1.41913e-06	2.26795e-05	At4g31320	K14488 SAUR family protein | (RefSeq) auxin-responsive protein SAUR50 (A)
novel.530	7569	2.11	0.96	230.333	117	-1.0762	down	1.43482e-06	2.28946e-05	At3g62150	K05658 ATP-binding cassette, subfamily B (MDR/TAP), member 1 [EC:7.6.2.2] | (RefSeq) ABC transporter B family member 21 (A)
GLYMA_07G097900	2541	9.67	3.74333	405.333	169.333	-1.32718	down	1.43527e-06	2.28946e-05	At3g18230	--
GLYMA_20G050500	942	2.56	6.21333	42.3333	116.333	1.34746	up	1.43615e-06	2.2898e-05	--	K15283 solute carrier family 35, member E1 | (RefSeq) triose phosphate/phosphate translocator, chloroplastic (A)
GLYMA_10G040700	2924	12.0467	25.55	629.667	1454.33	1.13204	up	1.45939e-06	2.32577e-05	At2g20370	K20888 xyloglucan galactosyltransferase MUR3 [EC:2.4.1.-] | (RefSeq) xyloglucan galactosyltransferase MUR3 (A)
GLYMA_04G189800	1923	5.39333	14.1933	42	121.667	1.44958	up	1.476e-06	2.34895e-05	At4g24750	--
GLYMA_02G302400	3152	0.543333	2.20667	17.6667	84	2.10291	up	1.49363e-06	2.3759e-05	At4g26580	K16283 E3 ubiquitin-protein ligase SDIR1 [EC:2.3.2.27] | (RefSeq) uncharacterized protein LOC100805406 (A)
GLYMA_19G015500	1825	5.54333	12.41	110	280	1.2322	up	1.50922e-06	2.3988e-05	At5g43150	--
GLYMA_05G124000	1305	0.56	2.14333	13	55.6667	1.99846	up	1.50943e-06	2.3988e-05	At5g06870	--
GLYMA_02G096600	2700	1.71667	4.20667	49.6667	137.333	1.35804	up	1.54175e-06	2.44787e-05	At1g69040	K00688 glycogen phosphorylase [EC:2.4.1.1] | (RefSeq) glycogen phosphorylase 1 (A)
GLYMA_06G166800	2269	0.0466667	0.956667	1.33333	29.3333	4.36995	up	1.5473e-06	2.45555e-05	At5g23660	K15382 solute carrier family 50 (sugar transporter) | (RefSeq) SWEET15; sugar efflux transporter SWEET15 (A)
GLYMA_05G191700	5775	46.1333	89.73	1990.67	4227.33	1.01059	up	1.55183e-06	2.46159e-05	At1g53570	K04421 mitogen-activated protein kinase kinase kinase 3 [EC:2.7.11.25] | (RefSeq) mitogen-activated protein kinase kinase kinase 3 isoform X2 (A)
GLYMA_12G196600	1512	10.2867	23.0133	208	520.333	1.2155	up	1.57271e-06	2.49356e-05	At2g32300	--
GLYMA_10G028300	3245	0.53	2.06	17.3333	74.3333	2.01171	up	1.58911e-06	2.51839e-05	At3g22640	--
GLYMA_08G210200	2032	5.48	2.06	145.333	60	-1.36157	down	1.59286e-06	2.52317e-05	At3g15680	--
GLYMA_05G194200	273	61.2033	14.2667	298.667	72.6667	-2.07136	down	1.5971e-06	2.52871e-05	--	--
GLYMA_07G253500	1273	6.52667	1.28333	148.333	35.6667	-2.23621	down	1.60832e-06	2.54471e-05	At3g21550	--
GLYMA_12G047900	5402	2.74	1.17333	163.333	79.3333	-1.15266	down	1.6087e-06	2.54471e-05	At2g23460	K19729 guanine nucleotide-binding protein G(t) subunit alpha 3 | (RefSeq) GPA2; guanine nucleotide-binding protein alpha-2 subunit (A)
GLYMA_20G020400	10645	4.76333	2.29333	311	165.667	-1.00082	down	1.61339e-06	2.55065e-05	At5g45030	--
GLYMA_08G128800	4492	0.353333	0.0133333	25	1	-4.73511	down	1.61395e-06	2.55065e-05	At3g47090	K13420 LRR receptor-like serine/threonine-protein kinase FLS2 [EC:2.7.11.1] | (RefSeq) probable LRR receptor-like serine/threonine-protein kinase At3g47570 (A)
GLYMA_04G097000	2053	1.5	3.71667	53	150.667	1.38466	up	1.625e-06	2.56456e-05	At4g14600	K08505 protein transport protein SFT1 | (RefSeq) bet1-like protein At4g14600 isoform X2 (A)
GLYMA_06G129800	2349	2.80667	0.7	52	14.6667	-1.93469	down	1.6347e-06	2.57748e-05	At5g53030	--
GLYMA_15G143900	3860	1.16	6.07	21.3333	131.333	2.45919	up	1.63671e-06	2.57946e-05	At5g49350	--
GLYMA_10G213000	1341	0.473333	3.24333	8.66667	67.3333	2.84376	up	1.67572e-06	2.63486e-05	At4g30230	--
GLYMA_05G030300	2490	0.186667	1.06667	6	37.6667	2.56437	up	1.69563e-06	2.66372e-05	At5g28470	K14638 solute carrier family 15 (peptide/histidine transporter), member 3/4 | (RefSeq) protein NRT1/ PTR FAMILY 1.2 (A)
GLYMA_01G231000	612	103.05	32.9067	1126.67	427.667	-1.55909	down	1.72081e-06	2.70203e-05	At1g33760	K09286 EREBP-like factor | (RefSeq) AP2 domain transcription factor TINY (A)
GLYMA_16G148900	1363	0.356667	2.79333	4.66667	42.3333	3.05822	up	1.74223e-06	2.73441e-05	At5g13900	--
GLYMA_05G170700	6982	3.50333	1.11333	214.333	72.6667	-1.61447	down	1.7469e-06	2.74048e-05	At4g20430	--
GLYMA_15G051400	8506	6.75	2.81667	273.667	126.667	-1.20629	down	1.77612e-06	2.78376e-05	At2g22590	K18823 soyasaponin III rhamnosyltransferase [EC:2.4.1.273] | (RefSeq) SGT3; soyasaponin III rhamnosyltransferase (A)
GLYMA_07G139700	1526	1.28333	4.90333	26	116	2.01475	up	1.77886e-06	2.78678e-05	At3g09270	K00799 glutathione S-transferase [EC:2.5.1.18] | (RefSeq) HSP26-A; probable glutathione S-transferase (A)
GLYMA_09G117100	9433	17.4733	40.22	422	1131.67	1.27718	up	1.78903e-06	2.80141e-05	At1g70790	K12486 stromal membrane-associated protein | (RefSeq) probable ADP-ribosylation factor GTPase-activating protein AGD11 (A)
GLYMA_01G179900	7459	9.69	4.55	577	300	-1.03571	down	1.79312e-06	2.80654e-05	At4g36870	--
GLYMA_17G035200	1020	9.43667	18.6467	172	375.333	1.03565	up	1.85042e-06	2.89225e-05	At3g06590	--
GLYMA_10G151300	865	84.0133	173.54	1128.33	2678.67	1.1147	up	1.85668e-06	2.90071e-05	At5g27760	--
GLYMA_02G018300	4186	8.4	17.1833	190.667	446.333	1.10106	up	1.86029e-06	2.90368e-05	--	--
GLYMA_05G220000	4493	23.1567	10.65	1244.67	628.667	-1.06751	down	1.86612e-06	2.91145e-05	At5g24320	K20241 WD repeat-containing protein 44 | (RefSeq) WD repeat-containing protein 44 (A)
GLYMA_17G124900	1620	54.5433	125.91	1114	2998.33	1.28124	up	1.87978e-06	2.93056e-05	At5g50200	--
GLYMA_06G136500	2289	2.95333	1.1	95.6667	40	-1.36151	down	1.88008e-06	2.93056e-05	At5g24490	--
GLYMA_04G135200	1040	5.44	14.2733	101.333	309.333	1.47058	up	1.90763e-06	2.97214e-05	--	--
GLYMA_10G290500	1930	0.92	0.0566667	25.6667	1.66667	-4.02057	down	1.91927e-06	2.98892e-05	At2g39490	--
GLYMA_06G174800	2253	1.32667	3.97	40	135	1.64494	up	1.9227e-06	2.99289e-05	At5g50260	K16292 KDEL-tailed cysteine endopeptidase [EC:3.4.22.-] | (RefSeq) CYSP2; cysteine proteinase precursor (A)
GLYMA_14G130000	1909	1.27333	4.24667	43.3333	169	1.81897	up	1.92608e-06	2.99678e-05	At2g25680	--
GLYMA_09G003100	3166	1.64333	0.49	78.3333	26.3333	-1.68056	down	1.94962e-06	3.03065e-05	At5g60900	K13416 brassinosteroid insensitive 1-associated receptor kinase 1 [EC:2.7.10.1 2.7.11.1] | (RefSeq) BRASSINOSTEROID INSENSITIVE 1-associated receptor kinase 1 isoform X1 (A)
GLYMA_15G112500	2614	1.61	4.1	42.6667	123.333	1.4207	up	1.96049e-06	3.04616e-05	At4g04020	--
GLYMA_01G145600	7941	0.5	2.25667	9	45.3333	2.23296	up	1.96537e-06	3.05236e-05	At4g28840	--
GLYMA_12G236500	5812	2.86333	1.05	254.333	106.333	-1.37512	down	1.97918e-06	3.07101e-05	At4g27220	K08596 sentrin-specific protease 7 [EC:3.4.22.68] | (RefSeq) probable disease resistance protein At5g47250 isoform X2 (A)
GLYMA_10G286800	1372	5.16333	13.43	100.667	294.333	1.44366	up	1.9807e-06	3.07197e-05	At5g08350	--
GLYMA_11G206900	5785	1.05667	0.253333	55.6667	15.3333	-1.97593	down	1.98407e-06	3.0758e-05	At1g70520	K13416 brassinosteroid insensitive 1-associated receptor kinase 1 [EC:2.7.10.1 2.7.11.1] | (RefSeq) BRASSINOSTEROID INSENSITIVE 1-associated receptor kinase 1 (A)
GLYMA_04G164300	2613	1.18667	0.296667	55.3333	16	-1.90754	down	2.04046e-06	3.15749e-05	At3g60580	--
GLYMA_05G025500	2021	18.4	37.42	610	1435.67	1.10034	up	2.07157e-06	3.20418e-05	At5g61430	--
GLYMA_13G005500	2153	44.53	16.4033	1715	672.333	-1.39796	down	2.1171e-06	3.27015e-05	At3g22120	--
GLYMA_09G208000	6040	3.54	1.53	142.667	68.3333	-1.15543	down	2.12036e-06	3.27371e-05	At1g32190_1	K01076 abhydrolase domain-containing protein 17 [EC:3.1.2.22] | (RefSeq) alpha/beta hydrolase domain-containing protein 17B (A)
GLYMA_19G046800	1367	5.55667	1.39667	87.3333	25.3333	-1.90719	down	2.18725e-06	3.37393e-05	At5g38410	K01602 ribulose-bisphosphate carboxylase small chain [EC:4.1.1.39] | (RefSeq) ribulose-1,5-bisphosphate carboxylase small subunit rbcS2 (A)
GLYMA_04G053900	9704	9.43	4.48333	443	229	-1.02432	down	2.22679e-06	3.43183e-05	At4g33080	K08790 serine/threonine kinase 38 [EC:2.7.11.1] | (RefSeq) serine/threonine-protein kinase tricornered (A)
GLYMA_20G139400	7786	7.33	3.43667	559.333	296.333	-1.03142	down	2.24193e-06	3.45361e-05	At4g05200	K13416 brassinosteroid insensitive 1-associated receptor kinase 1 [EC:2.7.10.1 2.7.11.1] | (RefSeq) BRASSINOSTEROID INSENSITIVE 1-associated receptor kinase 1 (A)
GLYMA_15G010800	5118	3.20333	1.26667	163	72.6667	-1.26984	down	2.26345e-06	3.48518e-05	At3g15650	K06130 lysophospholipase II [EC:3.1.1.5] | (RefSeq) acyl-protein thioesterase 2 isoform X1 (A)
GLYMA_02G059500	6458	4.05667	1.62	128.667	58	-1.25846	down	2.28487e-06	3.51499e-05	At4g36850	K23678 solute carrier family 66 (lysosomal lysine-arginine transporter), member 1 | (RefSeq) PQ-loop repeat-containing protein (A)
GLYMA_06G142500	4757	8.5	4.00333	601.333	307	-1.03851	down	2.30232e-06	3.54024e-05	At3g56370	K13416 brassinosteroid insensitive 1-associated receptor kinase 1 [EC:2.7.10.1 2.7.11.1] | (RefSeq) BRASSINOSTEROID INSENSITIVE 1-associated receptor kinase 1 (A)
GLYMA_02G104900	1978	2.50333	0.803333	88.6667	31	-1.60184	down	2.31338e-06	3.55565e-05	At4g34131	K23260 scopoletin glucosyltransferase [EC:2.4.1.128] | (RefSeq) scopoletin glucosyltransferase (A)
GLYMA_02G092500	1330	8.68667	17.9567	131	308.667	1.11486	up	2.31557e-06	3.55742e-05	At2g39530	--
GLYMA_10G091800	4004	1.34	0.453333	96	35.3333	-1.52689	down	2.34054e-06	3.59416e-05	At3g57880	K12486 stromal membrane-associated protein | (RefSeq) ADP-ribosylation factor GTPase-activating protein AGD12 (A)
GLYMA_07G231400	2201	0.11	0.893333	4.33333	39	3.08813	up	2.37404e-06	3.64233e-05	At5g19410	K05681 ATP-binding cassette, subfamily G (WHITE), member 2 | (RefSeq) ABC transporter G family member 14 (A)
GLYMA_13G314600	3623	0.816667	2.4	28	93	1.61584	up	2.37773e-06	3.64635e-05	At2g27300	--
GLYMA_17G117000	1982	0.76	3.75333	24	124.333	2.34026	up	2.38609e-06	3.65753e-05	At1g08070	K23541 Ca2+/H+ antiporter, TMEM165/GDT1 family | (RefSeq) putative pentatricopeptide repeat-containing protein At3g23330 (A)
GLYMA_02G252900	3563	0.896667	2.50333	29	90.6667	1.54035	up	2.38927e-06	3.66075e-05	At5g05840	--
GLYMA_17G255900	2359	13.4567	26.72	420.667	963	1.06191	up	2.4076e-06	3.68456e-05	At4g31500	K20617 cytochrome P450 family 71 subfamily A | (RefSeq) CYP71A9; cytochrome P450 71A9 precursor (A)
GLYMA_18G201900	4080	26.9933	54.3267	507	1150.67	1.07473	up	2.42062e-06	3.70057e-05	At5g05600	K05277 anthocyanidin synthase [EC:1.14.20.4] | (RefSeq) ANS3; leucoanthocyanidin dioxygenase (A)
GLYMA_06G111600	5025	0.693333	2.69667	21.6667	98.3333	2.03567	up	2.42067e-06	3.70057e-05	At4g08290	--
GLYMA_17G115300	4817	5.45667	16.8033	207.667	732.667	1.68715	up	2.42725e-06	3.70896e-05	At2g26690	K14638 solute carrier family 15 (peptide/histidine transporter), member 3/4 | (RefSeq) protein NRT1/ PTR FAMILY 8.3 (A)
GLYMA_05G180300	1389	0.136667	1.33667	3.33333	37.6667	3.37032	up	2.44357e-06	3.73057e-05	At5g65100	K14514 ethylene-insensitive protein 3 | (RefSeq) putative ETHYLENE INSENSITIVE 3-like 4 protein (A)
novel.192	2200	34.4233	70.1133	1354.33	3187	1.09765	up	2.47787e-06	3.77787e-05	--	--
GLYMA_13G363300	1063	0.103333	2.04	1.33333	29.3333	4.37404	up	2.50977e-06	3.8248e-05	--	--
GLYMA_09G091800	1577	0.273333	1.39	7.66667	44	2.40901	up	2.51683e-06	3.83384e-05	At1g80520	--
GLYMA_17G155000	1665	0.483333	2.39	10	56	2.36976	up	2.52243e-06	3.83894e-05	--	--
GLYMA_18G121900	1227	3.82667	1.35667	84	33.3333	-1.43458	down	2.5297e-06	3.8483e-05	At1g26920	--
GLYMA_17G174100	4283	3.01	5.85	91.6667	199.333	1.01998	up	2.54545e-06	3.86881e-05	At5g67050	K16818 phospholipase A1 [EC:3.1.1.32] | (RefSeq) phospholipase A(1) DAD1, chloroplastic (A)
novel.1292	675	22.17	9.17667	267.667	128.333	-1.1917	down	2.54983e-06	3.87375e-05	--	--
GLYMA_13G009100	1692	0.68	2.42	20.6667	85.3333	1.91226	up	2.55205e-06	3.87539e-05	At2g04240	K16285 RING/U-box domain-containing protein [EC:2.3.2.27] | (RefSeq) uncharacterized protein LOC100306440 (A)
GLYMA_09G181700	654	5.30333	1.24667	62	16	-2.04439	down	2.59721e-06	3.94047e-05	At1g66880	--
GLYMA_16G059700	5371	5.35333	2.15667	332.667	144.333	-1.26814	down	2.61433e-06	3.96347e-05	At5g14210	K13430 serine/threonine-protein kinase PBS1 [EC:2.7.11.1] | (RefSeq) serine/threonine-protein kinase (A)
GLYMA_09G036800	979	1.73333	5.43667	30.3333	110	1.72911	up	2.61469e-06	3.96347e-05	--	--
GLYMA_07G256700	2031	1.57	0.356667	57	13.6667	-2.11983	down	2.62219e-06	3.97306e-05	At5g19040	K10760 adenylate dimethylallyltransferase (cytokinin synthase) [EC:2.5.1.27 2.5.1.112] | (RefSeq) adenylate isopentenyltransferase 5, chloroplastic (A)
GLYMA_03G038700	2487	8.79667	2.40333	210	68.6667	-1.77361	down	2.65374e-06	4.01552e-05	At5g05340	K00430 peroxidase [EC:1.11.1.7] | (RefSeq) peroxidase P7 (A)
GLYMA_17G134200	4892	3.37667	1.23333	120.333	49.3333	-1.38692	down	2.65895e-06	4.02164e-05	At4g12300	K05280 flavonoid 3'-monooxygenase [EC:1.14.14.82] | (RefSeq) SF3'H1; flavonoid 3'-hydroxylase (A)
GLYMA_04G068000	3167	5.2	2.25	137.333	67.3333	-1.13691	down	2.67321e-06	4.04141e-05	At5g11270	--
GLYMA_02G028400	815	25.0633	51.2867	365.333	843.333	1.10191	up	2.68796e-06	4.06191e-05	--	--
GLYMA_09G013700	1766	9.89333	19.6567	277.333	600.333	1.0392	up	2.69437e-06	4.0698e-05	At1g51090	--
GLYMA_20G025800	2549	2.23667	6.66667	35	119.667	1.64586	up	2.69835e-06	4.074e-05	At1g13830	K19892 glucan endo-1,3-beta-glucosidase 4 [EC:3.2.1.39] | (RefSeq) glucan endo-1,3-beta-glucosidase 4 (A)
GLYMA_18G256400	7557	1.33333	3.31	40.6667	113.333	1.37176	up	2.70985e-06	4.08957e-05	At5g39890	K23953 plant cysteine oxidase [EC:1.13.11.-] | (RefSeq) uncharacterized protein LOC100781307 (A)
GLYMA_06G058500	5015	0.206667	1.20667	7.33333	47.3333	2.59334	up	2.79578e-06	4.21552e-05	At2g26250	K15397 3-ketoacyl-CoA synthase [EC:2.3.1.199] | (RefSeq) 3-ketoacyl-CoA synthase 10 (A)
GLYMA_14G063400	4739	5.62	2.41667	160.333	78.6667	-1.14001	down	2.81373e-06	4.23697e-05	At3g55730	K09422 transcription factor MYB, plant | (RefSeq) transcription factor MYB25 (A)
GLYMA_14G003800	1077	2.93333	7.85	56.3333	174	1.49158	up	2.83999e-06	4.27275e-05	--	--
GLYMA_16G142900	1787	0.05	0.796667	1.66667	28	3.98703	up	2.85546e-06	4.29413e-05	--	--
GLYMA_14G131300	3554	7.22333	3.43	276	143	-1.0272	down	2.91417e-06	4.37279e-05	At4g31140	K19893 glucan endo-1,3-beta-glucosidase 5/6 [EC:3.2.1.39] | (RefSeq) glucan endo-1,3-beta-glucosidase 5 (A)
GLYMA_15G252000	1327	0.126667	1.88667	2.66667	48.3333	3.99339	up	2.9384e-06	4.40722e-05	At1g78380	K00799 glutathione S-transferase [EC:2.5.1.18] | (RefSeq) LOW QUALITY PROTEIN: glutathione S-transferase 3 (A)
GLYMA_16G143400	922	4.57333	9.57	75.3333	179	1.13589	up	2.97892e-06	4.46211e-05	At2g23690	--
GLYMA_12G187000	1279	0.876667	3.46333	20	92.3333	2.06595	up	3.01447e-06	4.51141e-05	At3g11600	--
[truncated: 1,655 more rows]
