# Supplementary material for: Gma-miR408 Enhances Soybean Cyst Nematode Susceptibility by Suppressing Reactive Oxygen Species Accumulation
Source: Int J Mol Sci. 2022 Nov 14;23(22):14022. doi: 10.3390/ijms232214022 (PMC9695887; doi:10.3390/ijms232214022)
Supplement: Supplementary file 1 [file ijms-23-14022-s001.zip › Table.S6.xlsx]

## Sheet: Sheet1
Table S6 Significant differentially expressed genes (DEGs) in the comparison of EV vs STTM.
GeneID	length	FPKM-M EV	FPKM-M OE	Count-M EV	Count-M OE	log2Ratio	Regulation	P-value	padj	KOG	Annotation
GLYMA_01G005200	5328	0.523333	1.25667	30	68.3333	1.23304	up	0.000118691	0.00363952	At4g29210	K18592 gamma-glutamyltranspeptidase / glutathione hydrolase / leukotriene-C4 hydrolase [EC:2.3.2.2 3.4.19.13 3.4.19.14] | (RefSeq) glutathione hydrolase 3 isoform X1 (A)
GLYMA_01G006000	1334	71.29	28.2533	1384.67	523.667	-1.37076	down	5.27943e-08	5.94659e-06	At5g56550	--
GLYMA_01G009900	4322	2.45333	5.37	79.6667	164.667	1.09152	up	1.51181e-05	0.000679173	At1g32080	--
GLYMA_01G011600	4658	1.69333	0.606667	60	20.6667	-1.51832	down	0.000948247	0.018212	At4g16070	K13806 sn1-specific diacylglycerol lipase [EC:3.1.1.116] | (RefSeq) uncharacterized protein LOC100810158 (A)
GLYMA_01G016500	9633	0.0333333	0.243333	2.66667	18.3333	2.82828	up	0.000409421	0.00959574	At4g25960	K05658 ATP-binding cassette, subfamily B (MDR/TAP), member 1 [EC:7.6.2.2] | (RefSeq) ABC transporter B family member 2 (A)
GLYMA_01G024500	1744	1.69333	5.91333	52.6667	173.667	1.76745	up	2.20305e-10	5.56947e-08	--	--
GLYMA_01G025800	1493	11.55	5.38333	282.333	124	-1.13484	down	1.50162e-07	1.45662e-05	At3g26510	--
GLYMA_01G028500	1529	6.85	15.0333	187.333	389.667	1.10141	up	7.02475e-10	1.49842e-07	--	--
GLYMA_01G028800	1315	11.8433	4.37	278.667	97.6667	-1.47352	down	5.81695e-12	2.513e-09	At1g23390	--
GLYMA_01G033300	4665	0.1	1.02333	6.33333	61	3.36725	up	0.00316057	0.0444812	At5g17680	K13457 disease resistance protein RPM1 | (RefSeq) disease resistance protein RPM1 (A)
GLYMA_01G034600	2350	2.04333	4.44667	61.3333	126.333	1.08221	up	2.08261e-05	0.000881853	At1g70230	K23877 xyloglucan O-acetyltransferase | (RefSeq) protein ALTERED XYLOGLUCAN 4 (A)
GLYMA_01G036000	2253	12.09	2.00333	363.667	56.6667	-2.63425	down	3.40232e-06	0.000195485	At1g24100	K11820 N-hydroxythioamide S-beta-glucosyltransferase [EC:2.4.1.195] | (RefSeq) UDP-glycosyltransferase 74B1 (A)
GLYMA_01G036300	677	8.07333	3.88	97.6667	44.6667	-1.08951	down	0.000949156	0.0182192	--	--
GLYMA_01G040700	1300	0.676667	1.97	10.6667	29.6667	1.512	up	0.00294577	0.0422954	At5g39950	K03671 thioredoxin 1 | (RefSeq) uncharacterized protein LOC100527298 (A)
GLYMA_01G061000	1443	0.273333	1.37	7	34	2.28372	up	0.00237515	0.0359155	--	--
GLYMA_01G067800	1700	0.263333	1.02	6	22	1.9163	up	0.00295629	0.0424287	At5g10280	K09422 transcription factor MYB, plant | (RefSeq) transcription factor MYB53 (A)
GLYMA_01G069000	679	2.51	7.78333	30.3333	89.3333	1.60171	up	7.54969e-07	5.54115e-05	--	--
GLYMA_01G083000	2478	9.45	22.9333	315.667	721.333	1.24515	up	3.55385e-08	4.31635e-06	At1g13340	--
GLYMA_01G091100	5868	0.22	0.923333	10.3333	41	2.03474	up	1.13109e-05	0.00053172	At3g25620	K05681 ATP-binding cassette, subfamily G (WHITE), member 2 | (RefSeq) ABC transporter G family member 21 (A)
GLYMA_01G097400	8988	3.73667	1.70667	201.667	88	-1.16363	down	1.64869e-05	0.000728861	At4g37870	K01610 phosphoenolpyruvate carboxykinase (ATP) [EC:4.1.1.49] | (RefSeq) phosphoenolpyruvate carboxykinase (ATP) 1 isoform X1 (A)
GLYMA_01G102700	306	9.18	22.58	50.3333	117	1.25719	up	4.17019e-05	0.00155376	--	--
GLYMA_01G106800	2477	0.0466667	0.453333	2	18.6667	3.28794	up	0.000387679	0.00921679	At5g59720	K13993 HSP20 family protein | (RefSeq) heat shock protein (A)
GLYMA_01G135500	4421	2.58667	5.47667	73	147.333	1.04488	up	0.000740757	0.0151657	At2g45130	--
GLYMA_01G141100	1762	15.0767	7.19333	476	215.667	-1.10057	down	1.61584e-05	0.00071806	At2g45360	--
GLYMA_01G145200	3391	1.14667	2.36333	69.6667	135.667	1.00716	up	2.27398e-05	0.000951087	--	--
GLYMA_01G145600	7941	0.5	2.07333	9	35.3333	2.01747	up	3.3398e-05	0.0012997	At4g28840	--
GLYMA_01G146500	1850	4.36667	9.64333	144.333	302.333	1.10834	up	1.14413e-09	2.24034e-07	At4g28890	K10664 E3 ubiquitin-protein ligase ATL6/9/15/31/42/55 [EC:2.3.2.27] | (RefSeq) E3 ubiquitin-protein ligase ATL42 (A)
GLYMA_01G157400	1587	3.29333	9.75333	93.3333	261.333	1.531	up	1.89803e-10	5.02153e-08	At1g76410	K19040 E3 ubiquitin-protein ligase ATL10/75/76/77/78 [EC:2.3.2.27] | (RefSeq) RING-H2 finger protein (A)
GLYMA_01G157700	7169	0.453333	1.02333	37	77.6667	1.12937	up	0.00355586	0.0484657	At5g65980	K24139 auxin efflux carrier family protein | (RefSeq) protein PIN-LIKES 7 (A)
GLYMA_01G168400	2342	1.03	5.81667	17.6667	96	2.46207	up	3.17343e-06	0.000184823	At1g80160	K08234 glyoxylase I family protein | (RefSeq) GLYI-23; putative lactoylglutathione lyase (A)
GLYMA_01G175200	4660	0.85	3.44	34	132.333	1.97958	up	3.04421e-06	0.000178822	At2g25740_1	--
GLYMA_01G186200	10459	0.233333	2.57333	8.33333	85.3333	3.43489	up	0.00037732	0.00906233	At5g67030	K09838 zeaxanthin epoxidase [EC:1.14.15.21] | (RefSeq) zeaxanthin epoxidase, chloroplastic-like (A)
GLYMA_01G200400	2085	0.836667	2.89	23.3333	75.3333	1.75041	up	1.66528e-06	0.000108712	At2g35380	K00430 peroxidase [EC:1.11.1.7] | (RefSeq) peroxidase 20 precursor (A)
GLYMA_01G203400	3137	19.4933	6.79333	713	236	-1.55451	down	1.80074e-15	1.92055e-12	At4g17090	K01177 beta-amylase [EC:3.2.1.2] | (RefSeq) beta-amylase 3, chloroplastic (A)
GLYMA_01G204800	2704	23.48	50.25	498.333	1000.67	1.06234	up	1.90108e-06	0.000121048	At4g17030	K20628 expansin | (RefSeq) EXPB8; expansin-B3-like precursor (A)
GLYMA_01G210500	4042	5.81333	2.73333	216	97.6667	-1.1228	down	0.000971237	0.0184974	At1g12110	K14638 solute carrier family 15 (peptide/histidine transporter), member 3/4 | (RefSeq) protein NRT1/ PTR FAMILY 8.3 (A)
GLYMA_01G218200	1211	6.57	2.16	100.667	31	-1.64334	down	1.17246e-07	1.18387e-05	At3g14260	--
GLYMA_01G221700	2955	0.363333	0.936667	16	39	1.32443	up	0.00178714	0.0291277	At1g71480	--
GLYMA_01G227500	6653	0.9	1.92667	59	119.333	1.06436	up	5.1902e-05	0.00186067	--	--
GLYMA_01G235000	1439	5.75	17.11	109.333	306	1.53339	up	1.36281e-07	1.34816e-05	At1g05450	--
GLYMA_01G241500	3785	0.183333	0.813333	6.33333	26	2.106	up	0.00184139	0.0296858	At1g17870	--
GLYMA_02G001500	3295	0.623333	2.73333	22.3333	92	2.1045	up	2.03022e-06	0.000128314	At2g26640	K15397 3-ketoacyl-CoA synthase [EC:2.3.1.199] | (RefSeq) 3-ketoacyl-CoA synthase 11 (A)
GLYMA_02G001700	1990	7.54	3.47667	242.667	106	-1.14971	down	4.12958e-08	4.84324e-06	At3g22970	--
GLYMA_02G008900	1591	3.89667	1.98	104.333	50.3333	-1.01632	down	0.00121775	0.0218051	At3g21770	K00430 peroxidase [EC:1.11.1.7] | (RefSeq) peroxidase 5 isoform X1 (A)
GLYMA_02G022300	2356	3.89333	9.65333	121.667	285.667	1.273	up	9.73423e-08	1.00066e-05	At4g40060	K09338 homeobox-leucine zipper protein | (RefSeq) homeobox-leucine zipper protein HOX20 (A)
GLYMA_02G028400	815	25.0633	12.7133	365.333	175.667	-1.01404	down	4.01738e-05	0.00151001	--	--
GLYMA_02G029200	1715	20.4967	58.2067	628	1686.67	1.47166	up	2.77807e-21	1.05348e-17	At1g24130	--
GLYMA_02G033700	2337	7.2	3.50667	292.667	134.667	-1.07361	down	9.65307e-10	2.00884e-07	7294194	K03008 DNA-directed RNA polymerase II subunit RPB11 | (RefSeq) protein VAPYRIN-LIKE isoform X1 (A)
GLYMA_02G035400	1013	1.82	3.80667	33	65	1.02817	up	0.00181669	0.0294546	--	--
GLYMA_02G036400	1837	1.35	0.543333	44.3333	17	-1.34914	down	0.00105862	0.0197429	At1g23390	--
GLYMA_02G036800	2607	20.4267	42.7533	171	338.667	1.0317	up	7.42758e-08	7.99672e-06	--	--
GLYMA_02G037900	2847	4.34667	9.93	93.3333	201.667	1.15247	up	1.4583e-07	1.42201e-05	At1g24090_2	--
GLYMA_02G056400	3990	1.71667	4.68667	37	94.3333	1.42302	up	0.00170268	0.0281271	At2g18360	K13699 abhydrolase domain-containing protein 5 [EC:2.3.1.51] | (RefSeq) probable 1-acylglycerol-3-phosphate O-acyltransferase isoform X2 (A)
GLYMA_02G057500	6132	0.763333	0.23	25.6667	7.33333	-1.76415	down	0.00304301	0.0433814	At3g50660	K09587 steroid 22-alpha-hydroxylase [EC:1.14.13.-] | (RefSeq) cytochrome P450 90B1 (A)
GLYMA_02G059200	5367	7.62	2.34667	328.333	95.6667	-1.73544	down	1.99752e-19	5.68112e-16	At2g23790	K20858 calcium uniporter protein, mitochondrial | (RefSeq) calcium uniporter protein 2, mitochondrial isoform X1 (A)
GLYMA_02G059500	6458	4.05667	1.31667	128.667	39.3333	-1.66002	down	9.52793e-09	1.41999e-06	At4g36850	K23678 solute carrier family 66 (lysosomal lysine-arginine transporter), member 1 | (RefSeq) PQ-loop repeat-containing protein (A)
GLYMA_02G062600	3345	0.59	2.28667	15	54.6667	1.90861	up	6.25048e-05	0.00217233	At2g23540	--
GLYMA_02G072200	4304	4.81667	2.34333	150	69.6667	-1.07665	down	0.000170901	0.0048506	At5g18170	K00261 glutamate dehydrogenase (NAD(P)+) [EC:1.4.1.3] | (RefSeq) glutamate dehydrogenase 1 (A)
GLYMA_02G075000	3372	1.02333	0.336667	35	10.6667	-1.64539	down	0.00249314	0.0371438	At2g14670	K15378 solute carrier family 45, member 1/2/4 | (RefSeq) sucrose transport protein SUC8 (A)
GLYMA_02G080200	2958	49.8533	21.5567	2102.67	859.667	-1.24746	down	4.11341e-11	1.31202e-08	At5g50080	K09286 EREBP-like factor | (RefSeq) APETALA2/ethylene responsive factor-like protein (A)
GLYMA_02G083500	505	7.58333	23.6367	63.6667	187.333	1.60734	up	9.16961e-08	9.53011e-06	--	--
GLYMA_02G088900	2346	4.18	9.41667	175.333	374.667	1.13027	up	8.90934e-06	0.000437506	At3g18280	--
GLYMA_02G089400	415	18.7767	39.95	127.667	257	1.05263	up	7.87206e-07	5.74072e-05	--	--
GLYMA_02G102800	4808	12.2867	4.86	431.333	162.333	-1.36943	down	1.20423e-05	0.00055841	At3g19310	--
GLYMA_02G111200	3567	0.32	1.35	19	74.6667	2.03579	up	1.24049e-05	0.000573667	--	--
GLYMA_02G114100	2381	0.74	1.74333	21.3333	47.6667	1.20265	up	0.0017081	0.0281894	At2g02030	--
GLYMA_02G114300	3340	0.98	2.21667	23	49	1.13623	up	0.0034606	0.0474896	At1g13920	--
GLYMA_02G119300	1429	0.34	1.50333	8.66667	37	2.11435	up	0.00056861	0.0124318	--	--
GLYMA_02G122300	1991	1.36667	0.623333	48.6667	21	-1.15986	down	0.00205871	0.0323339	--	--
GLYMA_02G125800	2407	1.28333	3.25	55.3333	133	1.30327	up	2.71817e-05	0.00110176	--	--
GLYMA_02G125900	799	37.6533	81.74	537	1101	1.08357	up	6.38116e-09	1.00614e-06	--	--
GLYMA_02G127300	2921	0.523333	1.69333	12.3333	37.6667	1.65258	up	0.00107142	0.0199264	At1g68850	K00430 peroxidase [EC:1.11.1.7] | (RefSeq) peroxidase 11 isoform X1 (A)
GLYMA_02G130600	5057	0.48	2.09	21.3333	87	2.07942	up	1.40118e-08	1.94394e-06	At3g25620	K05681 ATP-binding cassette, subfamily G (WHITE), member 2 | (RefSeq) ABC transporter G family member 21 (A)
GLYMA_02G135800	741	3.52	1.56667	46.6667	19.6667	-1.20457	down	0.00202995	0.0320112	--	--
GLYMA_02G136000	1943	9.92667	23.04	254.667	557	1.17596	up	1.95557e-07	1.81363e-05	At3g19000	K24028 salicylic acid 3-hydroxylase [EC:1.14.11.-] | (RefSeq) protein DMR6-LIKE OXYGENASE 2 isoform X1 (A)
GLYMA_02G171300	2691	4.95	1.83333	157.667	55	-1.47385	down	1.11193e-06	7.77642e-05	At5g06710	K09338 homeobox-leucine zipper protein | (RefSeq) homeobox-leucine zipper protein HOX11 (A)
GLYMA_02G179100	4159	3.74	7.98667	109	218.667	1.05741	up	0.00094554	0.0181904	At2g41190	K15015 solute carrier family 32 (vesicular inhibitory amino acid transporter) | (RefSeq) amino acid transporter AVT1A (A)
GLYMA_02G179200	1577	1.48	3.84333	28.6667	70	1.34813	up	0.000839178	0.0164884	--	K15015 solute carrier family 32 (vesicular inhibitory amino acid transporter) | (RefSeq) amino acid transporter AVT1A (A)
GLYMA_02G196500	4933	2.51333	6.18	158.667	366.333	1.26558	up	2.51022e-06	0.000151899	At2g35940	--
GLYMA_02G202500	4503	0.423333	1.24	15.6667	43.6667	1.51385	up	0.000827358	0.0163313	At2g24270	K00131 glyceraldehyde-3-phosphate dehydrogenase (NADP+) [EC:1.2.1.9] | (RefSeq) ALDH11A1; NADP-dependent glyceraldehyde-3-phosphate dehydrogenase (A)
GLYMA_02G203400	1341	2.85	1.39333	68.6667	31.6667	-1.06816	down	0.00264225	0.038836	At2g24240	--
GLYMA_02G206300	6190	3.09	0.953333	168	48.6667	-1.73553	down	7.74784e-09	1.19111e-06	At2g24130	K13420 LRR receptor-like serine/threonine-protein kinase FLS2 [EC:2.7.11.1] | (RefSeq) probable LRR receptor-like serine/threonine-protein kinase At3g47570 (A)
GLYMA_02G240000	7474	32.46	13.7767	1540.67	618.667	-1.27291	down	4.08143e-10	9.10426e-08	At1g65840	K17839 polyamine oxidase [EC:1.5.3.17 1.5.3.-] | (RefSeq) polyamine oxidase 5 (A)
GLYMA_02G244200	2156	3.12333	6.58667	70.6667	141.333	1.04037	up	0.000101923	0.0032449	At5g37660	--
GLYMA_02G244300	1590	0.893333	2.69667	17.6667	50.6667	1.55511	up	0.000804235	0.0159952	At5g37670	K13993 HSP20 family protein | (RefSeq) peroxisomal small heat shock protein (A)
GLYMA_02G244600	2640	0.483333	1.48667	11.6667	34	1.58348	up	0.000500481	0.011282	At5g16600	K09422 transcription factor MYB, plant | (RefSeq) transcription factor MYB20 (A)
GLYMA_02G244900	2661	0.256667	1.3	6.33333	30.3333	2.31429	up	6.96555e-05	0.00236795	At1g74460	--
GLYMA_02G247000	3160	55.33	21.49	1144.33	421	-1.4027	down	4.14815e-14	3.21755e-11	At1g66480	--
GLYMA_02G249300	2510	0.846667	2.98333	28.6667	94.6667	1.78867	up	2.3136e-05	0.000964112	At3g11430	K13508 glycerol-3-phosphate acyltransferase [EC:2.3.1.15 2.3.1.198] | (RefSeq) glycerol-3-phosphate acyltransferase 5 (A)
GLYMA_02G261600	4230	2.38667	6.09	92.6667	221.667	1.32004	up	2.09022e-06	0.000131134	At2g40370	K05909 laccase [EC:1.10.3.2] | (RefSeq) laccase-5 (A)
GLYMA_02G261900	1167	19.0233	9.6	397.667	189	-1.02527	down	3.58056e-06	0.000204008	At2g38310	K14496 abscisic acid receptor PYR/PYL family | (RefSeq) abscisic acid receptor PYL4 (A)
GLYMA_02G264800	522	24.7167	11.3833	230.667	101.333	-1.15422	down	1.84646e-06	0.000118232	At3g11110	K19040 E3 ubiquitin-protein ligase ATL10/75/76/77/78 [EC:2.3.2.27] | (RefSeq) RING-H2 finger protein (A)
GLYMA_02G296600	3391	61.5767	151.567	3736	8668.67	1.26931	up	1.02381e-12	5.06402e-10	At2g40140	K23047 E3 ubiquitin-protein ligase UNKL [EC:2.3.2.27] | (RefSeq) zinc finger CCCH domain-containing protein 2 (A)
GLYMA_02G301800	4111	17.89	7.41333	849	333	-1.30413	down	1.57228e-18	2.98112e-15	At5g55930	--
GLYMA_02G303800	3876	1.46667	4.12333	71	187.333	1.45367	up	1.9341e-06	0.000122921	At3g20910	K08064 nuclear transcription factor Y, alpha | (RefSeq) NF-YA02; nuclear transcription factor Y subunit A-2 (A)
GLYMA_03G008100	2721	0.09	0.673333	4.33333	30.6667	2.86339	up	6.65975e-05	0.00229355	At1g01600	K15398 fatty acid omega-hydroxylase [EC:1.14.-.-] | (RefSeq) cytochrome P450 86A8 (A)
GLYMA_03G015800	832	4.47667	10.7267	66.6667	150.333	1.22453	up	7.9845e-07	5.79793e-05	At2g45760	--
GLYMA_03G015900	558	5.28	1.87	53	17.6667	-1.53416	down	0.00062217	0.0132547	At2g45760	--
GLYMA_03G016100	995	1.42667	3.74667	25.3333	62.6667	1.3523	up	0.00075376	0.0153217	At2g45760	--
GLYMA_03G016400	1094	30.1867	62.54	590.333	1152.33	1.0178	up	3.69136e-09	6.08611e-07	--	--
GLYMA_03G021300	1665	23.83	11.5733	710.667	327.333	-1.08002	down	6.03921e-07	4.61101e-05	At1g55230	--
GLYMA_03G022800	645	10.6233	4.96	122.667	54.3333	-1.13362	down	0.000205878	0.00563013	At1g24620	K13448 calcium-binding protein CML | (RefSeq) probable calcium-binding protein CML25 (A)
GLYMA_03G024500	1469	0.19	1.18	5	29.3333	2.61311	up	0.000529864	0.0117656	--	--
GLYMA_03G024600	1231	1.03333	2.75	22.6667	57.3333	1.3819	up	0.00326239	0.0455014	--	--
GLYMA_03G026600	1688	5.64333	2.32333	131.333	51.6667	-1.31223	down	0.000343285	0.00845307	At2g45360	--
GLYMA_03G038200	3219	2.16667	0.87	75.6667	29	-1.34576	down	0.000179849	0.00506034	At5g05340	K00430 peroxidase [EC:1.11.1.7] | (RefSeq) cationic peroxidase 1 (A)
GLYMA_03G038700	2487	8.79667	3.66333	210	83.6667	-1.29663	down	5.39283e-05	0.00191721	At5g05340	K00430 peroxidase [EC:1.11.1.7] | (RefSeq) peroxidase P7 (A)
GLYMA_03G057100	4229	6.81	3.01667	179.333	75.3333	-1.20909	down	5.40974e-07	4.19611e-05	At5g05600	K05277 anthocyanidin synthase [EC:1.14.20.4] | (RefSeq) ANS3; leucoanthocyanidin dioxygenase (A)
GLYMA_03G069400	12346	1.68667	7.41667	81.3333	337	2.09508	up	0.000184957	0.00516987	At3g55610_2	K12657 delta-1-pyrroline-5-carboxylate synthetase [EC:2.7.2.11 1.2.1.41] | (RefSeq) ALDH18B3; delta-1-pyrroline-5-carboxylate synthase (A)
GLYMA_03G103000	417	8.25	3.67667	61.6667	26	-1.1959	down	0.000821274	0.0162583	At2g44600	--
GLYMA_03G105700	3561	0.93	2.56	27.6667	71.6667	1.42992	up	0.000321082	0.00801624	At4g37850	K13422 transcription factor MYC2 | (RefSeq) transcription factor MYC2 (A)
GLYMA_03G106000	1272	1.30667	3.72333	29.6667	79.6667	1.47926	up	3.34824e-05	0.00130151	At3g50310	K20716 mitogen-activated protein kinase kinase kinase 17/18 | (RefSeq) mitogen-activated protein kinase kinase kinase 18 (A)
GLYMA_03G114800	2193	2.47667	0.99	97.3333	37	-1.35848	down	9.75826e-06	0.000474415	At2g28580	--
GLYMA_03G115100	4279	0.516667	2.28667	30	125.667	2.10682	up	1.70897e-10	4.66604e-08	At2g44930	--
GLYMA_03G116200	1611	6.81667	2.25	196.667	62	-1.63729	down	2.29178e-05	0.00095619	At4g01070	K08237 hydroquinone glucosyltransferase [EC:2.4.1.218] | (RefSeq) hydroquinone glucosyltransferase (A)
GLYMA_03G117500	2979	0.876667	2.02333	30	66	1.16872	up	0.00235495	0.0356733	At1g69170	--
GLYMA_03G122200	2598	7.71	18.13	225	498.667	1.19774	up	1.04722e-06	7.37471e-05	At5g07050	--
GLYMA_03G127800	946	0.393333	2.21667	6.66667	35.6667	2.456	up	1.77594e-05	0.0007731	At2g41180	--
GLYMA_03G129300	1859	2.61333	5.49	62.3333	122.667	1.03508	up	0.00291612	0.0419756	At2g41380	--
GLYMA_03G130600	2122	18.62	7.82333	366.667	145.667	-1.28659	down	9.50429e-13	4.77018e-10	At3g56980	--
GLYMA_03G134800	2844	11.7233	24.48	507.333	995.667	1.02727	up	1.54224e-05	0.000689843	At2g41640	--
GLYMA_03G149300	3836	20.7867	10.49	403.333	193	-1.0172	down	1.18295e-05	0.000550789	At2g48020	K03444 MFS transporter, SP family, ERD6-like sugar transporter | (RefSeq) sugar transporter ERD6-like 7 (A)
GLYMA_03G160100	1865	0.91	2.37	30.3333	75	1.34687	up	1.31501e-05	0.000602414	At5g63450	K13407 fatty acid omega-hydroxylase [EC:1.14.-.-] | (RefSeq) cytochrome P450 94A1 (A)
GLYMA_03G163100	1975	10.76	5.34	219	103.333	-1.05128	down	2.23326e-05	0.000937502	At2g31180	K09422 transcription factor MYB, plant | (RefSeq) transcription factor MYB14 (A)
GLYMA_03G170300	6864	0.136667	0.55	8.66667	33.3333	1.99032	up	0.000125723	0.00382084	At2g20180	K16189 phytochrome-interacting factor 4 | (RefSeq) transcription factor PIF4 isoform X2 (A)
GLYMA_03G172900	2934	3.25667	8.01667	85	196	1.25889	up	0.000204017	0.00559833	At2g37460	--
GLYMA_03G173000	6644	0.65	1.41333	35.6667	74	1.09604	up	0.000335659	0.00831932	At2g37440	K24221 type I inositol polyphosphate 5-phosphatase IP5P1/2 [EC:3.1.3.56] | (RefSeq) type I inositol polyphosphate 5-phosphatase 2 (A)
GLYMA_03G173300	888	20.3567	60.5533	324	904	1.53644	up	3.56904e-11	1.1942e-08	At2g37430	--
GLYMA_03G175300	2663	0.436667	1.84333	20.6667	82	2.05338	up	4.25602e-06	0.000235419	At3g53510	K05681 ATP-binding cassette, subfamily G (WHITE), member 2 | (RefSeq) ABC transporter G family member 9 (A)
GLYMA_03G196300	850	6.93333	23.2333	105.667	333.333	1.70573	up	1.08205e-09	2.1596e-07	At5g03890	--
GLYMA_03G208200	1869	27.7267	13.37	586.667	270	-1.08822	down	1.62438e-05	0.000720916	At1g05260	K00430 peroxidase [EC:1.11.1.7] | (RefSeq) peroxidase 3 (A)
GLYMA_03G218900	927	7.37667	15.82	99.3333	201.667	1.06312	up	5.02333e-07	3.93214e-05	--	--
GLYMA_03G226200	10645	65.2033	33.1533	6787.67	3264.67	-1.01301	down	5.18948e-07	4.03444e-05	At3g62010	--
GLYMA_03G229800	3231	0.113333	9.39	2.66667	205.667	6.32589	up	0.000161062	0.00464265	At1g56600	K18819 inositol 3-alpha-galactosyltransferase [EC:2.4.1.123] | (RefSeq) galactinol synthase 2 (A)
GLYMA_03G247000	4178	2.57	1.2	128	56.3333	-1.13771	down	4.78954e-05	0.00174267	At5g28840	K10046 GDP-D-mannose 3', 5'-epimerase [EC:5.1.3.18 5.1.3.-] | (RefSeq) GDP-mannose 3,5-epimerase 2 (A)
GLYMA_03G247100	4437	47.2267	21.8333	1715.67	754.333	-1.1495	down	1.23905e-08	1.76198e-06	At5g28770	--
GLYMA_03G251400	1198	1.92333	4.51667	38.3333	85.3333	1.20334	up	0.00133262	0.0233716	At1g08650	K08794 calcium/calmodulin-dependent protein kinase I [EC:2.7.11.17] | (RefSeq) PPCK4; phosphoenolpyruvate-carboxylase kinase (A)
GLYMA_03G260100	1057	0.43	1.53	8	27.3333	1.81285	up	0.00130523	0.0229984	--	--
GLYMA_04G000600	3442	0.11	0.426667	6.33333	23	1.89996	up	0.00206519	0.0324082	At2g17150	--
GLYMA_04G004500	3043	12.63	5.65667	559.333	237.667	-1.19477	down	1.04285e-09	2.106e-07	At4g34950	--
GLYMA_04G007300	2018	26.58	13.1467	960.333	450.333	-1.04851	down	2.46235e-06	0.000149615	At2g16570	K00764 amidophosphoribosyltransferase [EC:2.4.2.14] | (RefSeq) PUR1; amidophosphoribosyltransferase, chloroplastic (A)
GLYMA_04G017400	4761	1.76333	3.61	113	218.333	1.00108	up	8.85349e-06	0.00043539	At1g20640	--
GLYMA_04G019200	4972	1.95333	4.19667	51.6667	104.667	1.06393	up	0.000663693	0.0139995	At1g47670	K24917 amino acid permease | (RefSeq) amino acid permease 8 (A)
GLYMA_04G021000	6704	0.616667	3.99	21.3333	130	2.65874	up	2.77131e-08	3.46454e-06	At1g60420	K17609 nucleoredoxin [EC:1.8.1.8] | (RefSeq) thioredoxin-like superfamily protein (A)
GLYMA_04G022500	3762	0.11	0.643333	5	27.6667	2.49882	up	0.00010618	0.00333686	At1g20160	--
GLYMA_04G034100	845	3.71333	7.75	56	110.333	1.02209	up	0.000917349	0.0177484	--	--
GLYMA_04G038100	1417	2.73667	7.32	69.3333	174.333	1.37924	up	2.12574e-06	0.000132874	At5g42750	K14499 BRI1 kinase inhibitor 1 | (RefSeq) BRI1 kinase inhibitor 1 (A)
GLYMA_04G042100	1785	14.21	4.06667	357	96	-1.84055	down	4.94176e-13	2.81095e-10	At3g16150	K13051 L-asparaginase / beta-aspartyl-peptidase [EC:3.5.1.1 3.4.19.5] | (RefSeq) probable isoaspartyl peptidase/L-asparaginase 2-like (A)
GLYMA_04G042400	2801	31.6067	13.77	1584	656.667	-1.23674	down	5.6128e-07	4.33392e-05	At5g24080	K13430 serine/threonine-protein kinase PBS1 [EC:2.7.11.1] | (RefSeq) probable serine/threonine-protein kinase PBL7 (A)
GLYMA_04G044900	2291	58.8067	143.42	2412.33	5550.67	1.25469	up	8.54012e-19	1.82166e-15	At5g04340	--
GLYMA_04G050100	572	16.07	33.2467	164.333	322	1.01089	up	5.96604e-07	4.56536e-05	--	--
GLYMA_04G052000	2286	0.0766667	0.55	3	20.3333	2.79469	up	0.000160642	0.00464215	At2g26150	K09419 heat shock transcription factor, other eukaryote | (RefSeq) HSF-08; heat stress transcription factor 8 (A)
GLYMA_04G064800	4858	0.123333	0.79	6.66667	39.6667	2.6449	up	5.69415e-06	0.000302703	At4g32060	K22827 calcium uptake protein 1, mitochondrial | (RefSeq) calcium uptake protein, mitochondrial (A)
GLYMA_04G078400	955	6.21667	14.98	106.333	241.667	1.22873	up	3.76057e-05	0.00143242	At5g44460	K13448 calcium-binding protein CML | (RefSeq) calcium-binding protein CAST (A)
GLYMA_04G085600	398	8.03667	16.9633	57.3333	114.333	1.04419	up	4.76482e-05	0.00173738	--	--
GLYMA_04G099200	1010	0.313333	1.58333	5.66667	27	2.30954	up	0.00067341	0.0141346	At1g22470	--
GLYMA_04G100300	1316	64.6233	160.34	1519.33	3556.33	1.27555	up	1.96441e-13	1.34087e-10	At1g35140	--
GLYMA_04G100500	2301	0.09	2.39333	2	49.3333	4.70773	up	0.000930567	0.0179634	At1g22340	K13691 pathogen-inducible salicylic acid glucosyltransferase [EC:2.4.1.-] | (RefSeq) mogroside IE synthase (A)
GLYMA_04G101900	1655	1.81667	6.9	43.6667	156.333	1.8881	up	3.98015e-08	4.71662e-06	At1g34670	K09422 transcription factor MYB, plant | (RefSeq) transcription factor MYB93 (A)
GLYMA_04G102700	5790	13.5167	6.90667	475.333	232	-1.00476	down	0.000433291	0.0100597	At1g34580	K24193 MFS transporter, SP family, sugar:H+ symporter | (RefSeq) sugar transport protein 5 (A)
GLYMA_04G108000	2364	6.17667	13.9367	211.667	449	1.14005	up	1.58416e-07	1.53161e-05	At3g54000	--
GLYMA_04G109500	8034	2.55667	8.26333	112.333	340.667	1.66664	up	1.13858e-06	7.9142e-05	At5g36930	K13457 disease resistance protein RPM1 | (RefSeq) disease resistance protein RPM1 (A)
GLYMA_04G140900	2645	1.53	3.14	46	89	1.00047	up	0.000776798	0.0156594	At5g10230	K17098 annexin D | (RefSeq) annexin-like protein RJ4 isoform X1 (A)
GLYMA_04G147600	3502	1.34667	3.28333	34	78.6667	1.25493	up	0.00043976	0.0101615	At2g26660	K24195 xenotropic and polytropic retrovirus receptor 1 | (RefSeq) PHO1-H1; phosphate transporter PHO1 (A)
GLYMA_04G152100	2812	0.546667	1.37333	19.3333	46.3333	1.29182	up	0.0019457	0.0311467	At3g24330	K19893 glucan endo-1,3-beta-glucosidase 5/6 [EC:3.2.1.39] | (RefSeq) glucan endo-1,3-beta-glucosidase 5 (A)
GLYMA_04G168500	5322	0.4	1.58	24.6667	91.3333	1.94183	up	1.99408e-05	0.00085177	At1g74460	K00660 chalcone synthase [EC:2.3.1.74] | (RefSeq) CHS14; chalcone synthase (A)
GLYMA_04G180900	6833	19.31	8.48667	2203.67	916.667	-1.22041	down	5.93082e-10	1.28109e-07	At1g23870	K16055 trehalose 6-phosphate synthase/phosphatase [EC:2.4.1.15 3.1.3.12] | (RefSeq) probable alpha,alpha-trehalose-phosphate synthase [UDP-forming] 9 isoform X2 (A)
GLYMA_04G185400	2895	1.12667	0.436667	58.3333	21.6667	-1.40217	down	0.00161625	0.0270928	At2g01210	--
GLYMA_04G187300	2099	0.153333	1.59333	4.66667	46.6667	3.36026	up	3.92677e-07	3.24495e-05	At5g26655	K09422 transcription factor MYB, plant | (RefSeq) transcription factor MYB86 (A)
GLYMA_04G187700	2693	1.01333	3.35667	47	148	1.6954	up	2.48903e-10	6.15566e-08	At5g63130	--
GLYMA_04G190700	3299	0.206667	0.823333	9.33333	35	1.95673	up	0.000246737	0.00650261	At5g50260	K16292 KDEL-tailed cysteine endopeptidase [EC:3.4.22.-] | (RefSeq) CYSP1; cysteine proteinase precursor (A)
GLYMA_04G196400	4798	1.42333	3.03333	64	129.333	1.05264	up	0.000189711	0.00528113	At3g01930	--
GLYMA_04G197400	2627	0.586667	2.31	15	55.3333	1.94238	up	1.06331e-05	0.000505401	At1g08510	K10781 fatty acyl-ACP thioesterase B [EC:3.1.2.14 3.1.2.21] | (RefSeq) palmitoyl-acyl carrier protein thioesterase, chloroplastic isoform X1 (A)
GLYMA_04G198400	2837	5.65333	25.9067	133.667	579	2.1451	up	0.00322151	0.0451491	At5g50800	K15382 solute carrier family 50 (sugar transporter) | (RefSeq) SWEET4; sugar efflux transporter SWEET4 (A)
GLYMA_04G198600	1794	0.193333	8.31333	3	119.333	5.38729	up	9.89559e-06	0.000477677	At5g23660	K15382 solute carrier family 50 (sugar transporter) | (RefSeq) SWEET15; sugar efflux transporter SWEET15 (A)
GLYMA_04G212000	1262	3.49	7.34	52	103	1.03549	up	0.000800769	0.0159821	At5g64530	--
GLYMA_04G218400	3291	0.356667	1.00667	19.3333	51.6667	1.46501	up	7.09351e-05	0.00240173	At4g39410	K13424 WRKY transcription factor 33 | (RefSeq) WRKY62; WRKY transcription factor 62 (A)
GLYMA_04G222500	1679	4.36333	2.10333	131.333	60	-1.08628	down	1.10434e-05	0.000522024	At5g05250	--
GLYMA_04G228800	3529	80.46	257.567	603.667	1825	1.64127	up	8.58863e-22	4.18745e-18	--	--
GLYMA_04G229700	1215	2.01333	5.08333	43.6667	104.333	1.30454	up	6.54247e-06	0.000337803	At5g03890	--
GLYMA_04G234700	4387	0.516667	1.64333	16	47.6667	1.62402	up	0.000924763	0.0178716	At4g27810	--
GLYMA_05G003900	4631	1.69	8.22333	75.6667	343.333	2.24578	up	0.000803945	0.0159952	At5g40390	K06617 raffinose synthase [EC:2.4.1.82] | (RefSeq) galactinol--sucrose galactosyltransferase (A)
GLYMA_05G004400	1976	0.983333	0.23	34.6667	7.66667	-2.13701	down	4.11568e-05	0.00153769	At3g27650	K13944 LOB domain-containing protein 16 | (RefSeq) LOB domain-containing protein 16 (A)
GLYMA_05G011900	11531	0.833333	1.76333	73.6667	147	1.04123	up	6.53926e-06	0.000337803	At2g26910	K05681 ATP-binding cassette, subfamily G (WHITE), member 2 | (RefSeq) ABC transporter G family member 9 (A)
GLYMA_05G015500	486	2.58	7.73667	22.3333	63.3333	1.54976	up	8.29081e-05	0.00273577	At3g25600	K13448 calcium-binding protein CML | (RefSeq) probable calcium-binding protein CML15 (A)
GLYMA_05G023900	991	1.94667	5.72333	30.6667	85	1.51241	up	0.000266937	0.00696506	At3g25400	K16904 dCTP diphosphatase [EC:3.6.1.12] | (RefSeq) nucleoside triphosphate pyrophosphohydrolase-like (A)
GLYMA_05G026100	2431	1.99	5.79	53.6667	147.667	1.50842	up	6.07625e-06	0.000318062	At1g74460	--
GLYMA_05G034500	1639	29.8	11.48	428.667	155.333	-1.40441	down	1.78925e-08	2.39472e-06	At4g09600	--
GLYMA_05G034700	3861	1.04667	2.93	18.3333	48.3333	1.45011	up	0.000211168	0.00576096	At1g10200	K09377 cysteine and glycine-rich protein | (RefSeq) LIM domain-containing protein WLIM1 (A)
GLYMA_05G043900	2254	49.18	22.93	937.667	415.667	-1.13751	down	6.23005e-09	9.88955e-07	At3g48360	K10523 speckle-type POZ protein | (RefSeq) BTB/POZ and MATH domain-containing protein 4 (A)
GLYMA_05G050500	1098	1.96333	0.676667	38.3333	12.6667	-1.56947	down	0.00174874	0.0286993	At1g63000	K12451 3,5-epimerase/4-reductase [EC:5.1.3.- 1.1.1.-] | (RefSeq) LOW QUALITY PROTEIN: bifunctional dTDP-4-dehydrorhamnose 3,5-epimerase/dTDP-4-dehydrorhamnose reductase (A)
GLYMA_05G052800	1188	17.93	6.17	354.333	115.333	-1.57206	down	3.61489e-13	2.28468e-10	At2g45360	--
GLYMA_05G058900	2020	0.446667	1.27667	16	43.6667	1.48912	up	0.00180255	0.0293228	At4g16560_1	K22683 aspartyl protease family protein [EC:3.4.23.-] | (RefSeq) aspartyl protease family protein 2 (A)
GLYMA_05G065700	2863	2.38	0.52	57	12	-2.21773	down	8.33482e-06	0.000415274	At4g17030	K20628 expansin | (RefSeq) EXPB8; expansin-B3-like precursor (A)
GLYMA_05G068000	3699	11.0833	3.91333	407	134.667	-1.53285	down	9.761e-10	2.01899e-07	At4g17090	K01177 beta-amylase [EC:3.2.1.2] | (RefSeq) beta-amylase 3, chloroplastic (A)
GLYMA_05G083900	917	0.57	3.29333	9.33333	50.6667	2.4933	up	7.69628e-06	0.000386843	--	--
GLYMA_05G108200	1393	2.91	0.663333	72.6667	15.6667	-2.16703	down	3.57928e-08	4.33181e-06	At2g22850	--
GLYMA_05G126800	4818	0.0466667	0.24	3.33333	17	2.378	up	0.0028886	0.0416674	At5g61820	--
GLYMA_05G128200	4310	15.6367	7.91	1039.33	498.333	-1.01671	down	1.06681e-07	1.08039e-05	At5g46330	K13420 LRR receptor-like serine/threonine-protein kinase FLS2 [EC:2.7.11.1] | (RefSeq) LRR receptor-like serine/threonine-protein kinase FLS2 (A)
GLYMA_05G137800	3262	2.60667	0.923333	58	19.6667	-1.53989	down	0.000507335	0.0113913	At1g17020	K05278 flavonol synthase [EC:1.14.20.6] | (RefSeq) flavonol synthase/flavanone 3-hydroxylase (A)
GLYMA_05G138100	3998	1.16333	2.63	45.6667	99	1.13997	up	0.00287122	0.0414948	At2g01900	K01099 inositol polyphosphate 5-phosphatase INPP5B/F [EC:3.1.3.36] | (RefSeq) type IV inositol polyphosphate 5-phosphatase 9 isoform X2 (A)
GLYMA_05G138300	3193	4.28333	8.85333	71.3333	140	1.00776	up	0.000135925	0.00405504	At1g14700	K14379 tartrate-resistant acid phosphatase type 5 [EC:3.1.3.2] | (RefSeq) purple acid phosphatase 8 (A)
GLYMA_05G144500	5187	2.85	6.06	121	243.333	1.05271	up	2.59017e-08	3.26324e-06	At1g67710	K14491 two-component response regulator ARR-B family | (RefSeq) two-component response regulator ARR11 isoform X3 (A)
GLYMA_05G155500	2220	1.09667	2.30333	43.3333	86.3333	1.03716	up	0.00149936	0.0255094	At3g13620	--
GLYMA_05G155600	1674	9.63333	3.41	288.333	97	-1.53084	down	6.58734e-12	2.77555e-09	At1g15670	--
GLYMA_05G162100	3107	17.0867	8.41333	948.667	442	-1.06003	down	3.03205e-10	7.04155e-08	At1g29340	K08332 vacuolar protein 8 | (RefSeq) U-box domain-containing protein 15 (A)
GLYMA_05G170800	8735	0.0533333	0.216667	5.33333	21	2.02127	up	0.00196974	0.0314386	At1g30810	K11446 [histone H3]-trimethyl-L-lysine4 demethylase [EC:1.14.11.67] | (RefSeq) lysine-specific demethylase 5A (A)
GLYMA_05G170900	2078	1.73	5.45333	34.3333	102.667	1.62277	up	6.96599e-05	0.00236795	At4g20390	--
GLYMA_05G186700	2135	31.4367	4.9	976	144	-2.71688	down	1.2891e-22	7.33259e-19	At5g64750	K09286 EREBP-like factor | (RefSeq) ERF7; ethylene-responsive transcription factor 7 (A)
GLYMA_05G188900	910	1.03667	4.45333	17	68.6667	2.07235	up	4.16402e-06	0.000231079	At1g49210	K19040 E3 ubiquitin-protein ligase ATL10/75/76/77/78 [EC:2.3.2.27] | (RefSeq) RING-H2 finger protein ATL78 (A)
GLYMA_05G191500	1859	0.423333	2.08667	4.66667	21.3333	2.25653	up	0.00204843	0.0322029	--	--
GLYMA_05G192300	2090	0.666667	2.43	23.6667	82.6667	1.83049	up	0.000107974	0.00338387	--	--
GLYMA_05G202300	1929	2.16333	4.47667	44	85.6667	1.01379	up	0.000527325	0.0117245	At5g13180	--
GLYMA_05G211700	2864	21.41	58.5133	816.667	2103.67	1.41482	up	4.75485e-18	7.37629e-15	At4g11280	K20772 1-aminocyclopropane-1-carboxylate synthase 1/2/6 [EC:4.4.1.14] | (RefSeq) ACS1; 1-aminocyclopropane-1-carboxylate synthase (A)
GLYMA_05G212300	1605	5.33667	15.2667	107	286.667	1.48208	up	2.44253e-08	3.12214e-06	At5g41590	--
GLYMA_05G215900	2028	83.7667	175.06	2703	5356	1.02984	up	1.66855e-05	0.000736686	At4g23810	K13425 WRKY transcription factor 22 | (RefSeq) WRKY transcription factor 22 (A)
GLYMA_05G216000	901	132.173	289.09	2127.67	4422	1.08918	up	3.00544e-10	7.04155e-08	--	--
GLYMA_05G222400	1946	2.24667	1.01333	54.6667	23.3333	-1.18664	down	0.00139647	0.0241685	At2g19590	K05933 aminocyclopropanecarboxylate oxidase [EC:1.14.17.4] | (RefSeq) 1-aminocyclopropane-1-carboxylate oxidase 1 (A)
GLYMA_05G223000	1870	12.45	5.46667	352	144.667	-1.22082	down	1.33802e-06	9.13304e-05	At4g26200	K01762 1-aminocyclopropane-1-carboxylate synthase [EC:4.4.1.14] | (RefSeq) 1-aminocyclopropane-1-carboxylate synthase 7 (A)
GLYMA_05G224400	1934	7.57667	3.32667	262.333	109.667	-1.22033	down	3.02283e-07	2.58699e-05	At2g19810	K23048 RING finger protein unkempt | (RefSeq) zinc finger CCCH domain-containing protein (A)
GLYMA_05G224600	183	30.61	13.4067	100	42	-1.22421	down	0.00181358	0.0294489	--	--
GLYMA_05G227100	9286	1.84667	4.47	63	143.667	1.23423	up	0.000135292	0.00403969	At4g26080	K14497 protein phosphatase 2C [EC:3.1.3.16] | (RefSeq) probable protein phosphatase 2C 6 (A)
GLYMA_05G234600	1973	6.22667	13.6967	170.333	352.333	1.10399	up	2.67944e-05	0.00108995	At1g68320	K09422 transcription factor MYB, plant | (RefSeq) MYB84; MYB transcription factor MYB84 (A)
GLYMA_05G238100	1628	41.6	86.7333	778	1525	1.02328	up	2.157e-06	0.000134091	At2g01670	K07766 diphosphoinositol-polyphosphate diphosphatase [EC:3.6.1.52] | (RefSeq) nudix hydrolase 17, mitochondrial isoform X2 (A)
GLYMA_05G247800	2222	0.2	1.18	6.66667	37.3333	2.53588	up	2.51576e-05	0.00103283	At1g14700	K14379 tartrate-resistant acid phosphatase type 5 [EC:3.1.3.2] | (RefSeq) uncharacterized protein LOC100817359 precursor (A)
GLYMA_06G004200	1021	1.75333	0.436667	32	7.66667	-2.02491	down	0.000592601	0.0128494	At4g08950	--
GLYMA_06G004300	985	2.44	0.576667	43	9.66667	-2.11342	down	7.44108e-06	0.000377049	At4g34950	--
GLYMA_06G004800	1518	11.5633	23.9	314	612	1.01113	up	8.28596e-08	8.70127e-06	At4g38690	--
GLYMA_06G012200	2514	0.616667	1.84	22.3333	63.3333	1.54955	up	7.6836e-06	0.000386775	At4g34530	K23050 phenylcoumaran benzylic ether reductase [EC:1.3.1.-] | (RefSeq) eugenol synthase 1 (A)
GLYMA_06G013300	919	60.1367	30.63	769	371.333	-1.00993	down	4.65105e-12	2.0429e-09	--	--
GLYMA_06G019100	1447	0.6	2.18	15.6667	53.3333	1.81548	up	3.12337e-05	0.0012395	At1g76240	--
GLYMA_06G020300	1585	14.8867	36.1667	422.333	970.667	1.24013	up	6.68035e-09	1.04584e-06	SPAC144.04c	K01581 ornithine decarboxylase [EC:4.1.1.17] | (RefSeq) ODC2; ornithine decarboxylase (A)
GLYMA_06G020400	1253	6	2.36667	134.667	50.3333	-1.37494	down	3.35133e-07	2.83815e-05	At1g20340	K02638 plastocyanin | (RefSeq) putative plastocyanin (A)
GLYMA_06G021200	7366	0.41	8.48667	15.3333	296	4.33128	up	1.44455e-05	0.000653858	At1g60420	K17609 nucleoredoxin [EC:1.8.1.8] | (RefSeq) probable nucleoredoxin 2 isoform X2 (A)
GLYMA_06G031000	1283	33.07	13.64	537.667	211.333	-1.31316	down	3.53656e-06	0.000202515	At1g19530	--
GLYMA_06G031100	1153	9.54667	3.23	134	43	-1.59699	down	6.78267e-06	0.000345805	At1g19530	--
GLYMA_06G035300	4137	18.9667	8.47667	670.667	283.667	-1.20064	down	1.73187e-09	3.12735e-07	At4g31940	K23136 fraxetin 5-hydroxylase [EC:1.14.14.164] | (RefSeq) xanthotoxin 5-hydroxylase CYP82C4 (A)
GLYMA_06G040400	5611	3.86333	8.55333	197.667	411.667	1.11176	up	2.44156e-05	0.00100759	At3g19290	K14432 ABA responsive element binding factor | (RefSeq) BZIP71; transcription factor bZIP71 (A)
GLYMA_06G045700	1092	1.62333	3.67333	30.3333	65	1.1453	up	0.000296783	0.00754624	At5g43190	--
GLYMA_06G046200	2452	0.713333	2.11667	25.3333	71.6667	1.54397	up	2.66896e-05	0.00108698	At4g37630	K18811 cyclin D5, plant | (RefSeq) cyclin-D5-1 isoform X1 (A)
GLYMA_06G047800	2035	1.65667	3.65	60.3333	125	1.10085	up	0.000244859	0.00646312	At5g65920	--
GLYMA_06G048600	2281	1.25667	3.33	37.3333	94	1.3694	up	3.3643e-06	0.000193953	--	--
GLYMA_06G050300	1598	11.0067	3.81	315	103	-1.5643	down	2.02414e-15	2.09339e-12	At2g25900	K23048 RING finger protein unkempt | (RefSeq) zinc finger CCCH domain-containing protein (A)
GLYMA_06G051500	4728	13.8267	6.94	383.667	181.667	-1.03167	down	6.62116e-06	0.000340835	At5g11790	K18266 protein NDRG1 | (RefSeq) uncharacterized protein LOC100803300 (A)
GLYMA_06G051900	1729	0.866667	3.42667	18.6667	69.3333	1.93814	up	8.57322e-06	0.000424667	At5g56840	--
GLYMA_06G053300	769	35.58	17.91	490	232.667	-1.02469	down	4.8383e-07	3.81355e-05	At5g11970	--
GLYMA_06G058500	5015	0.206667	0.9	7.33333	30	2.08176	up	0.000826705	0.0163279	At2g26250	K15397 3-ketoacyl-CoA synthase [EC:2.3.1.199] | (RefSeq) 3-ketoacyl-CoA synthase 10 (A)
GLYMA_06G059700	4483	1.36333	3.74	44.3333	113.667	1.42091	up	0.00027716	0.00718239	At5g24940	K17506 protein phosphatase 1L [EC:3.1.3.16] | (RefSeq) uncharacterized protein LOC100807396 (A)
GLYMA_06G060700	2280	2.16667	4.63333	38.6667	78.3333	1.06036	up	0.000597527	0.0129233	At5g10810	--
GLYMA_06G066600	5235	0.82	1.8	25.3333	52.3333	1.09344	up	0.00250745	0.0372883	At5g11100	K12486 stromal membrane-associated protein | (RefSeq) ADP-ribosylation factor GTPase-activating protein AGD12 (A)
GLYMA_06G079500	3445	1.88333	4.07333	58.3333	120	1.07474	up	0.000124836	0.00379726	At5g10580	--
GLYMA_06G081100	4015	0.743333	2.25	25.6667	73.6667	1.56819	up	0.000509951	0.011435	At5g25610	--
GLYMA_06G099500	1274	3.48667	0.746667	79.3333	16.3333	-2.25208	down	1.73651e-06	0.000112624	--	--
GLYMA_06G102000	1483	32.9833	131.68	874	3286	1.96405	up	8.06922e-23	5.50789e-19	At4g08950	--
GLYMA_06G103300	1731	0.7	2.29333	17.6667	54.6667	1.67456	up	0.00043591	0.0100931	At1g34670	K09422 transcription factor MYB, plant | (RefSeq) transcription factor MYB93 (A)
GLYMA_06G104800	3176	0.53	1.32	20.3333	48.3333	1.28316	up	0.00356976	0.0485968	At5g65140	K01087 trehalose 6-phosphate phosphatase [EC:3.1.3.12] | (RefSeq) probable trehalose-phosphate phosphatase J isoform X2 (A)
GLYMA_06G105200	5240	0.533333	1.61333	18	51.3333	1.57354	up	0.00151488	0.0257349	At1g36070	K10599 pre-mRNA-processing factor 19 [EC:2.3.2.27] | (RefSeq) pre-mRNA-processing factor 19 (A)
GLYMA_06G106700	1245	0.58	4.67	11.3333	85	2.97581	up	0.00332936	0.0461527	At4g08570	K07213 copper chaperone | (RefSeq) copper chaperone homolog CCH (A)
GLYMA_06G111300	1883	2.39667	6.29	80.6667	199.667	1.35778	up	1.79899e-08	2.39835e-06	At1g77640	K09286 EREBP-like factor | (RefSeq) ethylene-responsive transcription factor ERF010 (A)
GLYMA_06G111600	5025	0.693333	8.29333	21.6667	241.667	3.54628	up	1.71381e-05	0.000751808	At4g08290	--
GLYMA_06G117200	2097	7.19333	16.5333	200	433.333	1.16258	up	1.71664e-08	2.30658e-06	At1g77330	K05933 aminocyclopropanecarboxylate oxidase [EC:1.14.17.4] | (RefSeq) 1-aminocyclopropane-1-carboxylate oxidase 5-like protein (A)
GLYMA_06G129800	2349	2.80667	6.82333	52	119	1.2448	up	2.87521e-06	0.000170955	At5g53030	--
GLYMA_06G134900	5151	0.89	1.92667	66.6667	136	1.06878	up	0.00123637	0.0220116	At4g27670	K13993 HSP20 family protein | (RefSeq) uncharacterized protein LOC100798019 (A)
GLYMA_06G135900	874	72.06	154.2	1125.67	2271.33	1.06226	up	2.79629e-11	9.63985e-09	--	--
GLYMA_06G136000	195	55.4967	136.363	193.333	448.667	1.25993	up	4.07016e-11	1.31048e-08	--	--
GLYMA_06G142200	905	2.12	5.43667	34.3333	82.6667	1.32044	up	0.000177329	0.00500583	--	--
GLYMA_06G148400	2212	2.04333	0.363333	59.3333	10	-2.52362	down	2.49713e-07	2.23823e-05	At5g64750	K09286 EREBP-like factor | (RefSeq) ERF5; ethylene-responsive transcription factor RAP2-3-like (A)
GLYMA_06G155100	4201	3.17333	7.26667	64	138	1.15621	up	8.4692e-05	0.00277337	At5g63970	K16280 E3 ubiquitin-protein ligase RGLG [EC:2.3.2.27] | (RefSeq) LOW QUALITY PROTEIN: E3 ubiquitin-protein ligase RGLG3 (A)
GLYMA_06G158000	6750	0.11	0.5	4.66667	20	2.14244	up	0.00107313	0.0199373	At5g64440	K02433 aspartyl-tRNA(Asn)/glutamyl-tRNA(Gln) amidotransferase subunit A [EC:6.3.5.6 6.3.5.7] | (RefSeq) glutamyl-tRNA(Gln) amidotransferase subunit A, chloroplastic/mitochondrial (A)
GLYMA_06G166800	2269	0.0466667	2.41	1.33333	62	5.62274	up	0.000466867	0.0106723	At5g23660	K15382 solute carrier family 50 (sugar transporter) | (RefSeq) SWEET15; sugar efflux transporter SWEET15 (A)
GLYMA_06G167000	2759	1.88	5.1	45.3333	116.667	1.39627	up	2.17679e-05	0.000918315	At5g50790	K15382 solute carrier family 50 (sugar transporter) | (RefSeq) SWEET17; sugar efflux transporter SWEET17 (A)
GLYMA_06G167600	3680	0.503333	1.41333	23	60.3333	1.45131	up	0.000197294	0.0054566	At5g41040	K15400 omega-hydroxypalmitate O-feruloyl transferase [EC:2.3.1.188] | (RefSeq) omega-hydroxypalmitate O-feruloyl transferase (A)
GLYMA_06G167900	2302	0.396667	2.57333	11.3333	68.6667	2.65763	up	3.6254e-07	3.0551e-05	At5g50720	K17279 receptor expression-enhancing protein 5/6 | (RefSeq) HVA22-like protein e isoform X2 (A)
GLYMA_06G168100	3108	0.326667	1.41667	9	37.3333	2.10617	up	9.09397e-05	0.00294467	At1g08510	K10781 fatty acyl-ACP thioesterase B [EC:3.1.2.14 3.1.2.21] | (RefSeq) palmitoyl-acyl carrier protein thioesterase, chloroplastic isoform X1 (A)
GLYMA_06G187000	2381	11.64	25.0667	231.333	471.667	1.07231	up	2.65492e-07	2.3293e-05	At5g62920	K14492 two-component response regulator ARR-A family | (RefSeq) two-component response regulator ARR6 (A)
GLYMA_06G194500	4261	0.296667	1.45	13	60	2.26669	up	3.94383e-07	3.25119e-05	At1g74460	K00660 chalcone synthase [EC:2.3.1.74] | (RefSeq) CHS14; chalcone synthase (A)
GLYMA_06G194600	1026	1.45667	4.97	15.3333	49.6667	1.73036	up	0.000338422	0.00837565	--	--
GLYMA_06G195100	2030	28.1467	12.6133	867.333	368.333	-1.19256	down	8.06238e-14	5.85449e-11	At1g08570	K03671 thioredoxin 1 | (RefSeq) thioredoxin-like superfamily protein (A)
GLYMA_06G213400	3515	0.523333	1.38667	18.3333	46	1.37416	up	0.000878144	0.017116	At2g03500	K14491 two-component response regulator ARR-B family | (RefSeq) two-component response regulator ARR12 isoform X1 (A)
GLYMA_06G220700	2369	24.11	10.3333	613.667	248.333	-1.25951	down	1.03467e-07	1.05261e-05	At5g20230	--
GLYMA_06G222500	4112	0.786667	2.81667	18.6667	64.3333	1.8036	up	0.00125985	0.022323	At3g03080	K00224 chloroplastic oxoene reductase [EC:1.3.1.-] | (RefSeq) chloroplast envelope quinone oxidoreductase homolog isoform X1 (A)
GLYMA_06G239900	1390	13.5233	35.7833	299	744.333	1.3666	up	5.21702e-08	5.89575e-06	At4g27520	--
GLYMA_06G248900	2368	55.42	18.1	1772	546.333	-1.64854	down	6.82864e-27	7.76849e-23	At3g15500	--
GLYMA_06G275500	1325	1.70333	0.646667	40.3333	14.3333	-1.4358	down	0.0017126	0.0282227	At2g42760	--
GLYMA_06G287000	1036	15.1233	41.9733	280	735	1.43626	up	4.23034e-16	4.95751e-13	At1g28480	K03676 glutaredoxin 3 | (RefSeq) glutaredoxin-C9 (A)
GLYMA_06G290200	2815	161.767	76.13	2562.67	1138.67	-1.12469	down	1.29704e-11	4.97379e-09	At2g20630	K17506 protein phosphatase 1L [EC:3.1.3.16] | (RefSeq) probable protein phosphatase 2C 58 (A)
GLYMA_06G293400	2741	1.55	0.723333	76	34	-1.13253	down	0.00161883	0.0271094	At4g03510	K10666 E3 ubiquitin-protein ligase RNF5 [EC:2.3.2.27] | (RefSeq) uncharacterized protein LOC100786373 (A)
GLYMA_06G294400	4288	6.08333	3.07667	254.667	123	-1.02329	down	0.00019016	0.00528931	At4g14400	K15503 serine/threonine-protein phosphatase 6 regulatory ankyrin repeat subunit B | (RefSeq) protein ACCELERATED CELL DEATH 6 (A)
GLYMA_06G295600	204	29.13	14.5367	106.333	50	-1.03537	down	0.000468713	0.0107073	--	--
GLYMA_06G303200	4085	5.25	1.83667	244.667	80.6667	-1.54536	down	3.43738e-09	5.69487e-07	At3g21720	K01637 isocitrate lyase [EC:4.1.3.1] | (RefSeq) ICL1; isocitrate lyase 1 (A)
GLYMA_06G304900	13140	0.0933333	0.67	5.66667	38.6667	2.80583	up	1.22606e-06	8.47045e-05	At3g21700	K07976 Rab family, other | (RefSeq) septum-promoting GTP-binding protein 1 (A)
GLYMA_06G307900	9829	0.296667	1.24	12.6667	49.3333	2.05072	up	0.0023376	0.0355208	At2g32540	K10999 cellulose synthase A [EC:2.4.1.12] | (RefSeq) cellulose synthase A catalytic subunit 7 [UDP-forming] (A)
GLYMA_07G011700	2408	4.69667	10.28	117	242.667	1.08398	up	0.000842388	0.0165324	At1g17710	K13248 pyridoxal phosphate phosphatase PHOSPHO2 [EC:3.1.3.74] | (RefSeq) inorganic pyrophosphatase 1-like protein (A)
GLYMA_07G021800	1548	24.85	11.2033	521.333	223.333	-1.18406	down	3.44221e-12	1.58756e-09	At1g80920	K03686 molecular chaperone DnaJ | (RefSeq) chaperone protein dnaJ A6, chloroplastic (A)
GLYMA_07G035100	5462	1.44667	3.10667	39.6667	80.6667	1.06919	up	0.000567916	0.0124246	At4g33090	K08776 puromycin-sensitive aminopeptidase [EC:3.4.11.14] | (RefSeq) aminopeptidase M1 isoform X2 (A)
GLYMA_07G035900	2059	15.2067	5.87667	560	206.333	-1.40611	down	3.90941e-11	1.27071e-08	At1g72820	K15121 solute carrier family 25, member 44 | (RefSeq) solute carrier family 25 member 44 (A)
GLYMA_07G039100	849	1.88333	0.136667	28.6667	2	-3.78926	down	1.2443e-05	0.00057465	At5g20630	--
GLYMA_07G048600	15786	0.883333	2.4	35.6667	91.6667	1.40247	up	1.72483e-05	0.000754704	At4g10490	K24028 salicylic acid 3-hydroxylase [EC:1.14.11.-] | (RefSeq) protein DMR6-LIKE OXYGENASE 2 isoform X1 (A)
GLYMA_07G065800	3892	5.38667	12.0133	96.6667	204	1.1225	up	4.79537e-08	5.54783e-06	At1g01490	--
GLYMA_07G069500	2814	0.303333	1.04333	15.3333	49	1.73715	up	0.000411124	0.00960386	At1g01600	K15398 fatty acid omega-hydroxylase [EC:1.14.-.-] | (RefSeq) cytochrome P450 86A8 (A)
GLYMA_07G069700	4607	2.5	6.11	81	185.667	1.26096	up	0.000164658	0.00472237	At1g01610	K13508 glycerol-3-phosphate acyltransferase [EC:2.3.1.15 2.3.1.198] | (RefSeq) probable glycerol-3-phosphate acyltransferase 8 (A)
GLYMA_07G071300	7501	13.3033	5.89	392.333	164.667	-1.21025	down	1.94924e-11	7.23103e-09	At4g00520	K01068 acyl-coenzyme A thioesterase 1/2/4 [EC:3.1.2.2] | (RefSeq) acyl-CoA thioesterase 2 isoform X2 (A)
GLYMA_07G080700	4238	39.7133	17.8033	2018.33	854.667	-1.19426	down	5.43449e-11	1.68613e-08	At2g19130	K13436 pto-interacting protein 1 [EC:2.7.11.1] | (RefSeq) pto-interacting protein 1 (A)
GLYMA_07G081400	6061	1.76	0.806667	75.6667	33	-1.15637	down	0.00269664	0.0394318	At3g11920	--
GLYMA_07G093900	4556	0.48	1.35	20.3333	53.6667	1.45083	up	7.57686e-05	0.00254268	At1g73800	--
GLYMA_07G104200	2079	54.5033	143.31	1430.33	3535.33	1.35807	up	2.62934e-09	4.48684e-07	At1g18300	K07766 diphosphoinositol-polyphosphate diphosphatase [EC:3.6.1.52] | (RefSeq) nudix hydrolase 18, mitochondrial (A)
GLYMA_07G104300	564	10.8867	5.22333	62	28	-1.0943	down	0.00142865	0.0246131	At1g67920	--
GLYMA_07G111300	4437	2.58667	6.85333	167.333	420	1.36928	up	1.99641e-11	7.32641e-09	At2g44930	--
GLYMA_07G111400	2910	0.34	0.836667	17.6667	41.3333	1.27102	up	0.0024555	0.0367883	At2g44930	--
GLYMA_07G120900	7508	13.1967	5.05	541.667	194.333	-1.42097	down	3.0836e-10	7.11082e-08	At3g60190	K17065 dynamin 1-like protein [EC:3.6.5.5] | (RefSeq) dynamin-related protein 3A (A)
GLYMA_07G125600	1377	55.81	23.27	1043.67	415.333	-1.30012	down	1.64796e-07	1.57544e-05	At5g56550	--
GLYMA_07G132600	4189	5.15333	1.71333	124.333	39.3333	-1.62229	down	4.20382e-09	6.83201e-07	At2g37640	K20628 expansin | (RefSeq) expansin-A8 (A)
GLYMA_07G133900	4319	0.546667	1.34	20	46.3333	1.25589	up	0.00176789	0.028917	At5g60020	K05909 laccase [EC:1.10.3.2] | (RefSeq) laccase-17 (A)
GLYMA_07G139700	1526	1.28333	3.47667	26	66.6667	1.40097	up	0.00125493	0.0222732	At3g09270	K00799 glutathione S-transferase [EC:2.5.1.18] | (RefSeq) HSP26-A; probable glutathione S-transferase (A)
GLYMA_07G143900	2717	0.256667	1.11333	10.6667	44.3333	2.09268	up	1.1327e-05	0.000531745	At1g74180	--
GLYMA_07G146800	3781	0.596667	1.72333	20.6667	56.3333	1.49511	up	0.00165999	0.027663	At2g38110	K13508 glycerol-3-phosphate acyltransferase [EC:2.3.1.15 2.3.1.198] | (RefSeq) glycerol-3-phosphate 2-O-acyltransferase 6 (A)
GLYMA_07G148900	3513	1.11667	2.5	24.3333	51.6667	1.12918	up	0.00249618	0.0371531	At5g01520	--
GLYMA_07G149600	4325	0.463333	2.18	23	101.667	2.20093	up	1.36382e-06	9.27211e-05	At3g51860	K07300 Ca2+:H+ antiporter | (RefSeq) vacuolar cation/proton exchanger 3 (A)
GLYMA_07G150900	4071	32.8267	13.18	798	305	-1.35305	down	1.85214e-10	4.93842e-08	At5g05600	K24028 salicylic acid 3-hydroxylase [EC:1.14.11.-] | (RefSeq) protein DOWNY MILDEW RESISTANCE 6 (A)
GLYMA_07G151100	1682	22.3633	9.01667	506.667	193.667	-1.34756	down	8.98488e-13	4.64614e-10	At5g01380	--
GLYMA_07G155200	2924	5.73667	14.0267	111.667	258.667	1.25616	up	6.67344e-05	0.00229412	At5g01600	K00522 ferritin heavy chain [EC:1.16.3.2] | (RefSeq) ferritin (A)
GLYMA_07G180600	970	3.55333	7.63667	61.6667	125.333	1.06523	up	0.000127931	0.00386387	At3g03280	--
GLYMA_07G181300	369	1.16667	5.17667	7.66667	32	2.11317	up	0.000795592	0.015916	--	--
GLYMA_07G193500	2082	2.98	0.82	110.667	29	-1.89365	down	2.8637e-07	2.48059e-05	CE18864	K00422 polyphenol oxidase [EC:1.10.3.1] | (RefSeq) polyphenol oxidase II, chloroplastic (A)
GLYMA_07G195300	2539	81.5133	21.14	1933	474.667	-1.98291	down	9.10289e-28	1.55336e-23	At4g27450	--
GLYMA_07G208700	2084	69.88	32.4667	1438.33	634.333	-1.14064	down	1.30196e-09	2.51042e-07	At2g15890	--
GLYMA_07G211500	4349	1.31333	4.13667	14.6667	43.3333	1.6281	up	0.001097	0.0202486	At1g49670_2	K00344 NADPH:quinone reductase [EC:1.6.5.5] | (RefSeq) quinone oxidoreductase-like protein 2 homolog (A)
GLYMA_07G215500	2396	3.86333	9.16667	165.333	371	1.20977	up	6.89249e-11	2.08171e-08	At2g15480	K14595 abscisate beta-glucosyltransferase [EC:2.4.1.263] | (RefSeq) abscisate beta-glucosyltransferase (A)
GLYMA_07G216400	2711	4.94667	2.26	136.667	59.6667	-1.16695	down	0.00011079	0.00345628	At2g01340	--
GLYMA_07G220000	2463	5.31667	2.32	174	72	-1.23512	down	3.20796e-07	2.73029e-05	At4g18340	K19891 glucan endo-1,3-beta-glucosidase 1/2/3 [EC:3.2.1.39] | (RefSeq) glucan endo-1,3-beta-glucosidase 3 isoform X1 (A)
GLYMA_07G244800	1914	1.65333	0.643333	56.6667	20.6667	-1.40056	down	0.0001879	0.00523925	At3g06780	--
GLYMA_07G251200	2826	2.32667	6.54667	44.3333	117.333	1.45813	up	2.15229e-06	0.000134067	At4g15630	--
GLYMA_07G253600	1097	11.0267	5.62	216.333	104.667	-1.00719	down	0.00028731	0.00737265	At3g21550	--
GLYMA_07G262000	3243	1.12	2.32	54.6667	107	1.01368	up	0.000153864	0.00448823	At1g62250	K14557 U3 small nucleolar RNA-associated protein 6 | (RefSeq) U3 small nucleolar RNA-associated protein 6 homolog (A)
GLYMA_07G264800	1283	7.20667	3.46667	165.333	75.3333	-1.09481	down	1.20884e-05	0.000559788	At1g12020	--
GLYMA_07G266500	3801	19.1667	53.7667	1302	3442	1.45849	up	6.36157e-13	3.50184e-10	At5g48150	K14494 DELLA protein | (RefSeq) DELLA protein DWARF8 (A)
GLYMA_08G000700	1858	0.38	1.30667	12	39.6667	1.75014	up	0.0012559	0.0222778	--	--
GLYMA_08G001600	162	17.1367	36.2933	49.6667	99	1.04647	up	0.000263876	0.00690102	--	--
GLYMA_08G009700	2211	2.17	4.87667	46.3333	99	1.13195	up	6.75434e-05	0.00231445	At5g13180	--
GLYMA_08G010400	772	9.31	4.14667	128.333	54	-1.21033	down	0.000715062	0.0147997	At5g50760	K14488 SAUR family protein | (RefSeq) auxin-responsive protein SAUR71 (A)
GLYMA_08G013600	3083	0.223333	0.713333	10	30	1.62965	up	0.000903582	0.0175218	At1g63440	K17686 P-type Cu+ transporter [EC:7.2.2.8] | (RefSeq) probable copper-transporting ATPase HMA5 (A)
GLYMA_08G024700	3622	0.553333	1.71	19	55.3333	1.59697	up	0.00242778	0.0364691	At5g46290	K09458 3-oxoacyl-[acyl-carrier-protein] synthase II [EC:2.3.1.179] | (RefSeq) 3-oxoacyl-[acyl-carrier-protein] synthase I, chloroplastic isoform X4 (A)
GLYMA_08G026200	2884	1.58333	3.31333	52.3333	103.667	1.026	up	0.000812802	0.0161374	At4g24050	K11153 retinol dehydrogenase 12 [EC:1.1.1.300] | (RefSeq) short-chain dehydrogenase TIC 32 B, chloroplastic (A)
GLYMA_08G027000	7435	21.55	10.42	1175.33	537	-1.08877	down	1.00047e-06	7.09875e-05	At2g07050	K20659 lupeol synthase [EC:5.4.99.41] | (RefSeq) lupeol synthase isoform X1 (A)
GLYMA_08G031400	2133	8.38	3.84333	319.667	139.333	-1.15995	down	1.63269e-09	3.012e-07	At2g19810	K23048 RING finger protein unkempt | (RefSeq) zinc finger CCCH domain-containing protein (A)
GLYMA_08G032800	1026	18.2533	6.16333	292	93.3333	-1.59548	down	6.95179e-09	1.07844e-06	At5g56550	--
GLYMA_08G033800	6334	2.1	5.05667	105	238	1.22929	up	1.1893e-05	0.00055299	At4g26080	K14497 protein phosphatase 2C [EC:3.1.3.16] | (RefSeq) probable protein phosphatase 2C 6 (A)
GLYMA_08G042100	1745	0.216667	0.943333	5.33333	21.6667	2.08813	up	0.00214265	0.0333151	At1g68320	K09422 transcription factor MYB, plant | (RefSeq) MYB184; MYB transcription factor MYB184 (A)
GLYMA_08G044200	4158	1	2.29	44.3333	96.6667	1.15994	up	0.000381373	0.00914678	At5g38260	K13416 brassinosteroid insensitive 1-associated receptor kinase 1 [EC:2.7.10.1 2.7.11.1] | (RefSeq) BRASSINOSTEROID INSENSITIVE 1-associated receptor kinase 1 isoform X1 (A)
GLYMA_08G044300	2711	1.22333	3.65667	49	136.667	1.55124	up	8.29652e-05	0.00273577	At5g38260	K13416 brassinosteroid insensitive 1-associated receptor kinase 1 [EC:2.7.10.1 2.7.11.1] | (RefSeq) BRASSINOSTEROID INSENSITIVE 1-associated receptor kinase 1 (A)
GLYMA_08G056400	2586	1	4.13667	38	151	2.00787	up	5.74577e-06	0.000304499	At3g17790	K14379 tartrate-resistant acid phosphatase type 5 [EC:3.1.3.2] | (RefSeq) purple acid phosphatase 17 isoform X1 (A)
GLYMA_08G062800	2779	4.49667	11.2033	155.333	365.333	1.28191	up	1.94823e-08	2.55735e-06	At5g48380	K13415 protein brassinosteroid insensitive 1 [EC:2.7.10.1 2.7.11.1] | (RefSeq) BRI1B; brassinosteroid receptor precursor (A)
GLYMA_08G069100	977	1.99	7.51333	34.6667	123	1.88159	up	1.03168e-07	1.05261e-05	--	--
GLYMA_08G070300	899	53.3667	122.87	858	1861.33	1.16708	up	2.53676e-09	4.3506e-07	--	--
GLYMA_08G076000	978	1.98	5.26667	34.6667	87.6667	1.37907	up	0.000406714	0.00955316	At3g43660	K22736 vacuolar iron transporter family protein | (RefSeq) vacuolar iron transporter homolog 4 (A)
GLYMA_08G083300	5303	2.64667	0.99	215	76.3333	-1.45033	down	2.17163e-11	7.80165e-09	At5g46330	K13420 LRR receptor-like serine/threonine-protein kinase FLS2 [EC:2.7.11.1] | (RefSeq) LRR receptor-like serine/threonine-protein kinase FLS2 (A)
GLYMA_08G100900	2830	2.93333	7.89667	109	277	1.39346	up	1.00409e-09	2.05201e-07	At1g67710	K14491 two-component response regulator ARR-B family | (RefSeq) two-component response regulator ARR11 isoform X3 (A)
GLYMA_08G103400	4054	17.2533	8.69333	1060.67	506	-1.02228	down	1.3834e-07	1.35673e-05	At1g67480	--
GLYMA_08G106900	540	9.88	25.8567	95.3333	235.667	1.34774	up	1.22533e-07	1.22637e-05	--	--
GLYMA_08G118500	1090	0.33	2.39	6.33333	43.3333	2.82989	up	0.000141567	0.00420133	At1g29290	--
GLYMA_08G125900	1053	10.7033	22.9933	201.333	409	1.06559	up	9.89818e-09	1.4624e-06	--	--
GLYMA_08G129300	1270	4.5	12.9767	68.3333	187	1.49206	up	3.00387e-05	0.00120046	At4g20390	--
GLYMA_08G131900	938	1.1	8.45667	18.3333	136.333	2.89925	up	0.000227076	0.00609746	--	--
GLYMA_08G145300	1782	5.12	1.26333	125	29	-2.0604	down	3.28309e-08	4.03317e-06	At5g64750	K09286 EREBP-like factor | (RefSeq) APETALA2/ethylene responsive factor-like protein (A)
GLYMA_08G151100	1373	7.39333	24.5467	181.333	566.667	1.69425	up	6.41124e-14	4.86243e-11	--	--
GLYMA_08G164400	2530	0.816667	2.33	21.3333	58	1.47754	up	0.000284416	0.0073204	At3g12750	K14709 solute carrier family 39 (zinc transporter), member 1/2/3 | (RefSeq) zinc transporter 1 (A)
GLYMA_08G170400	2045	3.98667	2.02	129.333	62	-1.01536	down	2.40309e-05	0.000996537	At3g12920	K19042 E3 ubiquitin-protein ligase BOI and related proteins [EC:2.3.2.27] | (RefSeq) probable BOI-related E3 ubiquitin-protein ligase 3 (A)
GLYMA_08G187400	3428	6.35667	3.10667	390.667	180.667	-1.0664	down	6.57755e-06	0.000339102	At1g11050	K13416 brassinosteroid insensitive 1-associated receptor kinase 1 [EC:2.7.10.1 2.7.11.1] | (RefSeq) BRASSINOSTEROID INSENSITIVE 1-associated receptor kinase 1 (A)
GLYMA_08G189500	5879	142.293	69.8867	7527.33	3508	-1.06328	down	1.64048e-07	1.5727e-05	At1g55020	K15718 linoleate 9S-lipoxygenase [EC:1.13.11.58] | (RefSeq) seed linoleate 9S-lipoxygenase (A)
GLYMA_08G194900	2210	0.89	2.83333	20	60	1.62759	up	6.12804e-05	0.00214068	At1g17710	K13248 pyridoxal phosphate phosphatase PHOSPHO2 [EC:3.1.3.74] | (RefSeq) inorganic pyrophosphatase 2 (A)
GLYMA_08G204300	8600	23.45	11.02	1257.67	557	-1.12836	down	4.09308e-08	4.81699e-06	At3g16170	K18660 malonyl-CoA/methylmalonyl-CoA synthetase [EC:6.2.1.-] | (RefSeq) malonate--CoA ligase isoform X1 (A)
GLYMA_08G210800	1107	20.3233	10.24	403	191.667	-1.02309	down	1.01617e-08	1.48845e-06	At1g15400	--
GLYMA_08G212900	2271	0.98	0.283333	32	8.66667	-1.8429	down	0.000368098	0.00888459	At3g15850	K20416 palmitoyl-[glycerolipid] 7-desaturase [EC:1.14.19.42] | (RefSeq) FAD5.2; delta-7 desaturase (A)
GLYMA_08G214800	1572	0.99	2.97	17	48.3333	1.54453	up	0.000160988	0.00464265	At1g80520	--
GLYMA_08G215300	5840	1.34	3.48667	33.3333	83	1.33984	up	0.000688225	0.0143924	At4g37850	--
GLYMA_08G216600	1409	0.456667	1.35333	10	28	1.53241	up	0.00182373	0.0294991	At5g25190	K09286 EREBP-like factor | (RefSeq) ethylene-responsive transcription factor 3 (A)
GLYMA_08G216800	2188	9.47667	19.6233	212.667	416.667	1.01348	up	7.9301e-08	8.4577e-06	At1g80690	K22763 deubiquitinase DESI2 [EC:3.4.19.12] | (RefSeq) deSI-like protein At4g17486 isoform X1 (A)
GLYMA_08G217300	537	4.34667	1.58667	35	12	-1.49111	down	0.00135046	0.0235715	--	--
GLYMA_08G220000	1575	48.41	19.4267	1137.67	435.667	-1.3539	down	1.91905e-09	3.41121e-07	At1g80920	--
GLYMA_08G241200	1813	4.46333	1.82667	117.333	45.3333	-1.3253	down	1.67942e-06	0.000109383	At3g29240	--
GLYMA_08G241600	5726	0.786667	2.01	40	97	1.31887	up	3.55189e-06	0.000203053	At5g15410	K05391 cyclic nucleotide gated channel, plant | (RefSeq) cyclic nucleotide-gated ion channel 2 isoform X1 (A)
GLYMA_08G254400	1052	0.636667	2.13667	12	38	1.71623	up	0.000283574	0.00730973	At3g30530	--
GLYMA_08G274400	6273	0.933333	0.286667	41.3333	12	-1.73351	down	0.00010362	0.00328666	At4g37930	K00600 glycine hydroxymethyltransferase [EC:2.1.2.1] | (RefSeq) serine hydroxymethyltransferase 3 (A)
GLYMA_08G295600	1435	4.29	11.3733	70.6667	178.333	1.35882	up	4.87124e-05	0.00176674	At5g39950	K03671 thioredoxin 1 | (RefSeq) uncharacterized protein LOC100527572 (A)
GLYMA_08G321400	3009	1.03667	4.99	37	170	2.23755	up	6.1433e-11	1.87201e-08	At5g10770	K22683 aspartyl protease family protein [EC:3.4.23.-] | (RefSeq) aspartyl protease family protein 2 (A)
GLYMA_08G321500	2767	0.833333	0.206667	35	8.33333	-2.04337	down	0.000845414	0.0165537	At5g10770	K22683 aspartyl protease family protein [EC:3.4.23.-] | (RefSeq) aspartyl protease family protein 2 (A)
GLYMA_08G321700	5980	0.59	1.96	17.3333	54	1.70277	up	0.00133589	0.0234048	At3g20300	--
GLYMA_08G324300	6182	5.22333	2.57333	267.667	126	-1.05549	down	0.000584997	0.0127249	At4g26690	K01126 glycerophosphoryl diester phosphodiesterase [EC:3.1.4.46] | (RefSeq) putative glycerophosphoryl diester phosphodiesterase precursor (A)
GLYMA_08G338800	1617	0.916667	2.90667	26.6667	79.6667	1.62329	up	4.23108e-06	0.000234419	At4g01070	K08237 hydroquinone glucosyltransferase [EC:2.4.1.218] | (RefSeq) hydroquinone glucosyltransferase (A)
GLYMA_08G338900	6080	0.166667	1.23333	6.66667	46.3333	2.82155	up	1.70632e-05	0.000749485	At4g01070	K08237 hydroquinone glucosyltransferase [EC:2.4.1.218] | (RefSeq) hydroquinone glucosyltransferase (A)
GLYMA_08G355200	3070	0.946667	0.306667	52.3333	16	-1.66841	down	0.000754925	0.0153362	At5g24080	K13415 protein brassinosteroid insensitive 1 [EC:2.7.10.1 2.7.11.1] | (RefSeq) BRI1B; brassinosteroid receptor precursor (A)
GLYMA_09G001700	9186	1.18	2.60667	67.3333	140.667	1.10697	up	1.25856e-06	8.63915e-05	At1g16390	K08202 MFS transporter, OCT family, solute carrier family 22 (organic cation transporter), member 4/5 | (RefSeq) organic cation/carnitine transporter 4 (A)
GLYMA_09G005300	1290	2.25667	5.83333	52	128	1.32994	up	1.60201e-05	0.000713774	At4g04480	--
GLYMA_09G028000	6942	0.536667	1.48333	55.6667	145.333	1.42983	up	7.97598e-08	8.48013e-06	At5g11720	K01187 alpha-glucosidase [EC:3.2.1.20] | (RefSeq) alpha-glucosidase (A)
GLYMA_09G036800	979	1.73333	7.25667	30.3333	120.667	2.03276	up	1.02842e-11	4.08127e-09	--	--
GLYMA_09G038800	2935	1.32333	3.72333	27	72	1.46032	up	6.89925e-05	0.00234995	At5g49350	--
GLYMA_09G040600	2481	256.08	646.773	4288.33	10185.7	1.2969	up	0.0024911	0.0371423	--	--
GLYMA_09G054600	10668	0.123333	0.506667	20.6667	80	1.99852	up	0.000150811	0.00441425	At2g16670	K22733 magnesium transporter | (RefSeq) probable magnesium transporter NIPA4 (A)
GLYMA_09G056600	1405	0.99	2.43	24.6667	57.6667	1.26758	up	0.00239754	0.0362036	At4g30180	--
GLYMA_09G061500	4444	16.76	8.35333	536.667	255	-1.03998	down	2.31937e-06	0.000142627	At2g19330	--
GLYMA_09G065800	2481	0.0733333	1.07	1.66667	23	3.83699	up	1.36123e-05	0.00062109	At5g19890	K00430 peroxidase [EC:1.11.1.7] | (RefSeq) uncharacterized protein LOC100787073 precursor (A)
GLYMA_09G072000	1243	15.97	35.0533	355	734.333	1.10137	up	3.03293e-10	7.04155e-08	At1g19210	K09286 EREBP-like factor | (RefSeq) ethylene-responsive transcription factor ERF023 (A)
GLYMA_09G091900	4431	2.12333	4.56333	88.3333	179.333	1.07096	up	2.88874e-05	0.00116125	At1g80530	--
GLYMA_09G098400	20301	0.356667	0.153333	100.667	41	-1.24995	down	6.25111e-06	0.000325219	At4g08100	K22913 phosphatidylinositol 3,5-bisphosphate 5-phosphatase [EC:3.1.3.-] | (RefSeq) phosphoinositide phosphatase SAC2 isoform X2 (A)
GLYMA_09G103600	3526	0.666667	0.183333	27.6667	7.33333	-1.877	down	0.00353585	0.0482555	At3g58480	--
GLYMA_09G129100	1520	1.10333	0.296667	23.3333	6	-1.91995	down	0.00117616	0.0212501	At5g52830	K13425 WRKY transcription factor 22 | (RefSeq) probable WRKY transcription factor 27 (A)
GLYMA_09G130500	1065	1.86	4.61333	23.6667	55.3333	1.27603	up	0.000322968	0.00805743	At1g01490	--
GLYMA_09G139200	3103	3.58	8.60333	85.6667	192.667	1.23104	up	6.39195e-05	0.00220577	At5g23750	--
GLYMA_09G140700	2158	0.466667	1.83667	18	66.6667	1.94502	up	4.53102e-07	3.62153e-05	At3g05200	K10664 E3 ubiquitin-protein ligase ATL6/9/15/31/42/55 [EC:2.3.2.27] | (RefSeq) E3 ubiquitin-protein ligase ATL6-like (A)
GLYMA_09G145700	4038	17.17	3.59	472	94	-2.2962	down	1.15898e-18	2.32676e-15	At3g61060	--
GLYMA_09G148400	1941	2.09	0.903333	73	29.6667	-1.24361	down	0.00148077	0.0252557	At5g51920	K15631 molybdenum cofactor sulfurtransferase [EC:2.8.1.9] | (RefSeq) molybdenum cofactor sulfurase isoform X3 (A)
GLYMA_09G163900	1030	82.2467	41.26	1515	719	-1.03217	down	2.71587e-15	2.72617e-12	At1g17860	--
GLYMA_09G173400	2156	86.1	177.683	2175.33	4216.67	1.01118	up	4.0444e-07	3.32606e-05	At1g18300	K07766 diphosphoinositol-polyphosphate diphosphatase [EC:3.6.1.52] | (RefSeq) nudix hydrolase 18, mitochondrial (A)
GLYMA_09G185500	1355	0.0533333	1.81	1.33333	41.3333	4.99727	up	0.00114606	0.0208386	--	--
GLYMA_09G190600	1895	1.39667	4.57	32	98.6667	1.66962	up	1.86845e-05	0.000806176	At3g24520	K09419 heat shock transcription factor, other eukaryote | (RefSeq) HSF-16; heat stress transcription factor 16 (A)
GLYMA_09G197400	5307	0.236667	0.67	15.3333	41.6667	1.4751	up	0.00263617	0.0387801	At1g42540	K05387 glutamate receptor, ionotropic, plant | (RefSeq) glutamate receptor 3.6 (A)
GLYMA_09G206200	2517	5.84667	13.5	168	366.667	1.1716	up	2.08729e-10	5.31621e-08	At3g02940	K09422 transcription factor MYB, plant | (RefSeq) transcription factor MYB41 (A)
GLYMA_09G210400	4355	2.05	0.776667	132	47.6667	-1.42533	down	1.79257e-06	0.000115431	At3g07040	K13457 disease resistance protein RPM1 | (RefSeq) disease resistance protein RPM1 (A)
GLYMA_09G231400	6129	12.55	5.08	1115	426	-1.33857	down	2.44716e-21	1.04399e-17	At5g51460	K01087 trehalose 6-phosphate phosphatase [EC:3.1.3.12] | (RefSeq) trehalose-phosphate phosphatase A (A)
GLYMA_09G245400	1966	2.01667	4.64667	37	81.3333	1.16649	up	0.000342963	0.00845126	At2g44740	--
GLYMA_09G246800	3483	0.553333	1.89333	8	26	1.74395	up	0.00114478	0.020834	At4g37850	K13422 transcription factor MYC2 | (RefSeq) transcription factor MYC2 (A)
GLYMA_09G253800	1524	26.1567	13.0433	477.667	225.667	-1.04071	down	2.01042e-10	5.198e-08	At1g19640	K21483 salicylate 1-O-methyltransferase [EC:2.1.1.274] | (RefSeq) S-adenosyl-L-methionine:benzoic acid/salicylic acid carboxyl methyltransferase 3 (A)
GLYMA_09G254400	1881	0.8	3.38667	15.3333	61.3333	2.05255	up	3.38504e-05	0.00131282	At5g41570	K13424 WRKY transcription factor 33 | (RefSeq) WRKY62; WRKY transcription factor 62 (A)
GLYMA_09G262800	2374	5.13667	1.39667	133	34.3333	-1.9109	down	1.08703e-11	4.21581e-09	At3g61220	K15095 (+)-neomenthol dehydrogenase [EC:1.1.1.208] | (RefSeq) short-chain dehydrogenase/reductase domain-containing protein (A)
GLYMA_09G274000	2030	35.3267	77.0467	753.667	1557.33	1.08881	up	1.43791e-06	9.71769e-05	At3g56400	K13425 WRKY transcription factor 22 | (RefSeq) WRKY transcription factor 22 (A)
GLYMA_09G275300	2329	0.57	1.9	23.6667	74.3333	1.70208	up	2.08242e-05	0.000881853	At5g01880	K19040 E3 ubiquitin-protein ligase ATL10/75/76/77/78 [EC:2.3.2.27] | (RefSeq) RING-H2 finger protein (A)
GLYMA_09G282500	20888	0.41	1.52667	42.6667	148.333	1.85773	up	1.77413e-10	4.80549e-08	At1g04600	K10357 myosin V | (RefSeq) myosin-7 (A)
GLYMA_09G284700	1644	2.34	0.713333	56.3333	16.3333	-1.74167	down	0.000916811	0.0177481	At4g11290	K00430 peroxidase [EC:1.11.1.7] | (RefSeq) peroxidase 5 (A)
GLYMA_10G006600	2333	4.83333	1.96	115	44	-1.33674	down	1.64728e-06	0.000107908	At2g31180	K09422 transcription factor MYB, plant | (RefSeq) transcription factor MYB4 (A)
GLYMA_10G010100	845	8.45667	19.3467	127.667	275.333	1.15362	up	1.51241e-05	0.000679173	--	--
GLYMA_10G012400	1296	29.4767	12.96	683.333	284.333	-1.22481	down	5.69212e-13	3.18469e-10	At2g47360	--
GLYMA_10G021400	2986	1.01	2.51667	29.3333	69	1.28613	up	9.04638e-05	0.00293762	At2g47890	--
GLYMA_10G023300	4056	20.86	9.65333	957.333	420	-1.14987	down	7.57143e-08	8.10048e-06	At5g35960	K13416 brassinosteroid insensitive 1-associated receptor kinase 1 [EC:2.7.10.1 2.7.11.1] | (RefSeq) somatic embryogenesis receptor-like kinase-like protein precursor (A)
GLYMA_10G028100	1588	1.89333	11.0533	28.6667	156.667	2.51406	up	2.06828e-09	3.63857e-07	At2g48130	--
GLYMA_10G028200	4983	0.276667	0.953333	18	58.6667	1.76112	up	1.27232e-05	0.000585216	At2g48140	K02895 large subunit ribosomal protein L24 | (RefSeq) LOW QUALITY PROTEIN: 50S ribosomal protein L24-like (A)
GLYMA_10G028300	3245	0.53	1.65	17.3333	51	1.60794	up	0.000320227	0.00801248	At3g22640	--
GLYMA_10G037600	1889	0.313333	1.02	8.66667	27	1.6745	up	0.00245214	0.0367542	At2g31160	--
GLYMA_10G045300	899	0.186667	0.966667	3	14.6667	2.34517	up	0.00305197	0.0434083	At2g28200	--
GLYMA_10G047100	2256	3.71	8.18333	81	170.667	1.09993	up	0.000749258	0.0152756	At2g37330	K02069 UDP-glucose/iron transport system permease protein | (RefSeq) protein ALUMINUM SENSITIVE 3 (A)
GLYMA_10G053200	1278	6.18333	2.29	141.333	50	-1.46715	down	1.57088e-06	0.000104043	At2g28400	--
GLYMA_10G056400	330	3.28667	11.8367	19.3333	65.6667	1.80725	up	3.63762e-05	0.00139493	At3g09870	K14488 SAUR family protein | (RefSeq) auxin-responsive protein SAUR32 (A)
GLYMA_10G063000	3668	1.65	3.94667	60.3333	136.667	1.22775	up	4.80467e-05	0.00174631	At2g36690	K24028 salicylic acid 3-hydroxylase [EC:1.14.11.-] | (RefSeq) protein DMR6-LIKE OXYGENASE 2 isoform X1 (A)
GLYMA_10G081900	1302	46.8667	23.83	1089.33	526.333	-1.01126	down	9.78088e-06	0.000474839	At2g35930	--
GLYMA_10G086800	11375	0.143333	0.993333	21.6667	141	2.75447	up	0.00165339	0.0275665	At3g52310	K05681 ATP-binding cassette, subfamily G (WHITE), member 2 | (RefSeq) ABC transporter G family member 22 isoform X1 (A)
GLYMA_10G090700	8933	25.4133	12.4	948.667	440	-1.07792	down	7.85857e-06	0.000394419	At5g13700	K13366 polyamine oxidase [EC:1.5.3.14 1.5.3.16 1.5.3.-] | (RefSeq) polyamine oxidase 1 (A)
GLYMA_10G112700	3192	0.506667	1.21	21.6667	48.6667	1.21378	up	0.00110391	0.0203185	At1g50480	K01938 formate--tetrahydrofolate ligase [EC:6.3.4.3] | (RefSeq) formate--tetrahydrofolate ligase isoform X1 (A)
GLYMA_10G119400	5004	1.79333	0.576667	76	23.6667	-1.67011	down	0.00135028	0.0235715	At5g59190	--
GLYMA_10G139400	3160	2.92333	7.47667	119.333	289	1.31993	up	4.03942e-13	2.46181e-10	At3g62040	K18551 pyrimidine and pyridine-specific 5'-nucleotidase [EC:3.1.3.-] | (RefSeq) uncharacterized protein LOC100814291 (A)
GLYMA_10G147900	1224	0.533333	2.71667	7.33333	35	2.31544	up	0.000210713	0.00575315	At1g56320	--
GLYMA_10G151100	400	4.92	1.40667	35.3333	9.66667	-1.83688	down	0.00073217	0.0150622	--	--
GLYMA_10G153500	2582	0.283333	0.79	13	34.6667	1.44921	up	0.00182376	0.0294991	At1g09030	K08065 nuclear transcription Y subunit beta | (RefSeq) nuclear transcription factor Y subunit B-4 (A)
GLYMA_10G172600	4740	0.373333	1.00667	17.3333	44	1.39609	up	0.00116005	0.0210089	At4g24140	K13699 abhydrolase domain-containing protein 5 [EC:2.3.1.51] | (RefSeq) probable 1-acylglycerol-3-phosphate O-acyltransferase (A)
GLYMA_10G179400	3003	4.06	12.73	164.667	485	1.6151	up	0.00216536	0.0335671	At2g26640	K15397 3-ketoacyl-CoA synthase [EC:2.3.1.199] | (RefSeq) 3-ketoacyl-CoA synthase 11 (A)
GLYMA_10G181200	1810	0.94	2.39667	22.3333	54	1.31548	up	0.000447234	0.0103133	At2g31160	--
GLYMA_10G186700	1539	6.89333	25.4833	189.333	662.667	1.85601	up	5.51385e-15	5.22729e-12	--	--
GLYMA_10G192400	12168	46.79	23.05	3490.67	1623.33	-1.05606	down	2.11499e-16	2.57794e-13	At3g24180	K17108 non-lysosomal glucosylceramidase [EC:3.2.1.45] | (RefSeq) non-lysosomal glucosylceramidase isoform X1 (A)
GLYMA_10G193600	1112	1.12	5.27667	15.6667	70	2.19896	up	1.40842e-05	0.000640054	At2g32300	--
GLYMA_10G195700	3782	4.83	1.72333	317	106	-1.52603	down	1.87732e-06	0.000119983	At1g73080	K20718 LRR receptor-like serine/threonine-protein kinase ERECTA [EC:2.7.11.1] | (RefSeq) LRR receptor-like serine/threonine-protein kinase ERECTA (A)
GLYMA_10G200800	4415	2.40333	5.33333	116.333	245	1.11727	up	3.54752e-08	4.31635e-06	At2g45580	K22983 cytochrome P450 family 76 subfamily A | (RefSeq) cytochrome P450 76A2 (A)
GLYMA_10G205600	4984	1.59667	3.66667	77.3333	166.667	1.15404	up	0.000601907	0.0129851	At3g25620	K05681 ATP-binding cassette, subfamily G (WHITE), member 2 | (RefSeq) ABC transporter G family member 21 (A)
GLYMA_10G209800	6144	1.97667	4.55	100.667	219	1.16926	up	2.60252e-06	0.000156651	At3g53260	K10775 phenylalanine ammonia-lyase [EC:4.3.1.24] | (RefSeq) PAL2.4; phenylalanine ammonia-lyase 2 isoform X1 (A)
GLYMA_10G214600	954	2.03667	6.84333	34.6667	110	1.7139	up	5.79256e-08	6.48178e-06	--	--
GLYMA_10G223500	7256	1.56667	3.84	121.667	280	1.25785	up	6.39224e-07	4.86966e-05	At4g39350	K10999 cellulose synthase A [EC:2.4.1.12] | (RefSeq) cellulose synthase A catalytic subunit 2 [UDP-forming] isoform X1 (A)
GLYMA_10G228900	6421	0.0566667	0.636667	4	42	3.46488	up	1.57304e-06	0.000104043	At5g24080	K13416 brassinosteroid insensitive 1-associated receptor kinase 1 [EC:2.7.10.1 2.7.11.1] | (RefSeq) BRASSINOSTEROID INSENSITIVE 1-associated receptor kinase 1 (A)
GLYMA_10G231200	2418	2.76667	7.80667	65.6667	174.667	1.45905	up	7.39572e-07	5.46339e-05	At4g25700	K15746 beta-carotene 3-hydroxylase [EC:1.14.15.24] | (RefSeq) BCH3; beta-carotene hydroxylase BCH3 (A)
GLYMA_10G231600	5462	1.12	0.166667	48.6667	7	-2.76352	down	5.01924e-06	0.00027234	At5g23980	K00521 ferric-chelate reductase [EC:1.16.1.7] | (RefSeq) ferric reduction oxidase 4 isoform X1 (A)
GLYMA_10G234700	2064	4.87667	10.3533	135.667	273	1.04957	up	2.05504e-07	1.89558e-05	At5g52400	K20661 cytochrome P450 family 714 subfamily A1 | (RefSeq) LOW QUALITY PROTEIN: cytochrome P450 714A1-like (A)
GLYMA_10G236000	2877	0.0533333	1.72333	1.66667	50.3333	4.95257	up	0.0001831	0.00513055	At5g52300	--
GLYMA_10G239000	1878	5.55667	1.81	186.667	58	-1.65294	down	6.94478e-07	5.2246e-05	At4g23030	K03327 multidrug resistance protein, MATE family | (RefSeq) protein DETOXIFICATION 49 (A)
GLYMA_10G239300	1464	9.22667	3.67667	241.667	90.6667	-1.36566	down	1.35302e-08	1.90814e-06	At1g63040	K09286 EREBP-like factor | (RefSeq) AP2-2; AP2 domain-containing transcription factor 2 (A)
GLYMA_10G246800	1966	3.32333	13.92	61.6667	242.333	2.03289	up	1.36202e-09	2.58246e-07	At3g22620	--
GLYMA_10G253300	17769	0.163333	0.373333	48	103.333	1.15538	up	0.00161708	0.0270934	At1g42375	K13430 serine/threonine-protein kinase PBS1 [EC:2.7.11.1] | (RefSeq) serine/threonine-protein kinase PBS1 isoform X2 (A)
GLYMA_10G264100	1529	0.76	3.26333	13	53	2.06054	up	1.05336e-06	7.39718e-05	At1g71050	K07213 copper chaperone | (RefSeq) copper chaperone homolog CCH (A)
GLYMA_10G272000	3162	16.0533	38.2367	608	1366.33	1.21889	up	3.99457e-10	8.96913e-08	At1g68390	--
GLYMA_10G272300	1372	1.16667	2.84	28.6667	66.3333	1.24766	up	0.000326216	0.0081266	At1g68360	--
GLYMA_10G275300	2290	0.506667	1.71667	9	28.6667	1.72271	up	0.00168035	0.027907	--	--
GLYMA_10G279200	1740	0.343333	1.04333	10.6667	31	1.56685	up	0.00202308	0.0319804	At1g55230	--
GLYMA_10G286300	13920	7.46	3.38	659	282	-1.17737	down	5.45415e-09	8.73918e-07	At3g19960	K10357 myosin V | (RefSeq) myosin-2 (A)
GLYMA_10G288100	2151	1.34667	2.84667	51.6667	104	1.04889	up	6.21018e-05	0.00216494	At3g20015	K22683 aspartyl protease family protein [EC:3.4.23.-] | (RefSeq) protein ASPARTIC PROTEASE IN GUARD CELL 1 (A)
GLYMA_10G295300	6217	137.103	61.8433	4140.33	1772.33	-1.18957	down	3.285e-10	7.47425e-08	At2g18950	K09833 homogentisate phytyltransferase / homogentisate geranylgeranyltransferase [EC:2.5.1.115 2.5.1.116] | (RefSeq) G4DT; glycinol 4-dimethylallyltransferase (A)
GLYMA_10G297900	900	3.68667	1.15333	41.3333	12.3333	-1.71034	down	0.000143288	0.00423725	At1g16220	K14497 protein phosphatase 2C [EC:3.1.3.16] | (RefSeq) protein phosphatase 2C 37 (A)
GLYMA_11G014800	1227	3.20667	0.83	70.3333	17.3333	-1.99231	down	2.43748e-05	0.00100713	At1g71520	K09286 EREBP-like factor | (RefSeq) ethylene-responsive transcription factor ERF010 (A)
GLYMA_11G019600	1647	0.33	1.1	9.66667	30.6667	1.71312	up	0.000640776	0.0136002	--	--
GLYMA_11G036400	995	11.2767	25.12	200.667	422.667	1.11555	up	2.59116e-08	3.26324e-06	At5g47230	K09286 EREBP-like factor | (RefSeq) ethylene-responsive transcription factor 5-like protein (A)
GLYMA_11G039400	3553	44.7133	19.2633	1624.67	662	-1.24719	down	9.90056e-12	3.97525e-09	At4g17090	K01177 beta-amylase [EC:3.2.1.2] | (RefSeq) beta-amylase 3, chloroplastic (A)
GLYMA_11G040600	1207	0.433333	1.81333	9.33333	36.6667	2.04005	up	0.000915929	0.0177411	At2g45760	--
GLYMA_11G042200	1995	0.386667	1.42	7.66667	27	1.84305	up	0.0024747	0.0369786	At1g32470	K02437 glycine cleavage system H protein | (RefSeq) uncharacterized protein LOC100306654 (A)
GLYMA_11G055700	8441	1.99333	4.99667	101	238	1.28923	up	1.43764e-05	0.000651598	At5g67030	K09838 zeaxanthin epoxidase [EC:1.14.15.21] | (RefSeq) zeaxanthin epoxidase, chloroplastic-like (A)
GLYMA_11G062500	3495	6.65333	3.26333	206	95.6667	-1.06374	down	8.76829e-06	0.000432447	At3g26300	K13267 flavonoid 6-hydroxylase [EC:1.14.13.-] | (RefSeq) F6H2; cytochrome P450 71D9-like (A)
GLYMA_11G063200	1905	0.64	1.59667	21.6667	51.3333	1.29115	up	0.00122204	0.0218561	At2g23770	K13429 chitin elicitor receptor kinase 1 | (RefSeq) chitin elicitor receptor kinase 1 (A)
GLYMA_11G082500	1918	25.32	12.67	504.667	240.667	-1.03409	down	5.9408e-07	4.55626e-05	At4g35750	K24997 ganglioside-induced differentiation-associated protein 2 | (RefSeq) protein GDAP2 homolog isoform X2 (A)
GLYMA_11G085900	10806	2.19667	10.35	168	739.667	2.19761	up	3.73572e-05	0.00143094	At4g35560	K08518 syntaxin-binding protein 5 | (RefSeq) uncharacterized protein LOC100777534 isoform X1 (A)
GLYMA_11G091300	1600	0.483333	2.59333	13	66	2.38587	up	1.69977e-08	2.29295e-06	At4g35070	K19042 E3 ubiquitin-protein ligase BOI and related proteins [EC:2.3.2.27] | (RefSeq) probable BOI-related E3 ubiquitin-protein ligase 3 (A)
GLYMA_11G093300	3219	2.98667	0.98	93.6667	29	-1.63812	down	3.63758e-07	3.05781e-05	At1g51410	--
GLYMA_11G096600	2598	4.00333	11.24	127.333	337.333	1.45472	up	8.98716e-12	3.69546e-09	At2g17040	--
GLYMA_11G097000	4297	1.51667	4.86667	51.6667	156.333	1.6397	up	3.17701e-07	2.71071e-05	At1g47670	K24917 amino acid permease | (RefSeq) amino acid permease 6 (A)
GLYMA_11G100100	3321	0.926667	3.73667	38.3333	145.333	1.98175	up	3.02443e-07	2.58699e-05	At5g23190	K15402 fatty acid omega-hydroxylase [EC:1.14.-.-] | (RefSeq) cytochrome P450 86B1 (A)
GLYMA_11G105800	889	16.0567	5.63333	255.667	85.6667	-1.54205	down	3.18423e-06	0.000185135	At4g36040	K03686 molecular chaperone DnaJ | (RefSeq) chaperone protein dnaJ A6, chloroplastic (A)
GLYMA_11G118100	4397	9.40667	4.49	434	196.667	-1.10148	down	2.64607e-07	2.32752e-05	At1g63850	--
GLYMA_11G121800	1466	16.3267	1.87333	295.333	32.3333	-3.1527	down	4.53965e-26	3.87334e-22	At2g16060	--
GLYMA_11G121900	1130	0.64	2.18333	13	42	1.72703	up	0.000113523	0.00351581	At5g66580	--
GLYMA_11G129300	3839	10.76	4.96	350.667	154	-1.15469	down	1.048e-06	7.37471e-05	At2g44450	K01188 beta-glucosidase [EC:3.2.1.21] | (RefSeq) beta-glucosidase 13 (A)
GLYMA_11G129600	3318	24.97	57.2967	873.667	1901.33	1.16226	up	2.60405e-10	6.34813e-08	At2g44480	K01188 beta-glucosidase [EC:3.2.1.21] | (RefSeq) cyanogenic beta-glucosidase (A)
GLYMA_11G129700	2852	33.16	74.81	1097.33	2345.33	1.13881	up	1.19475e-07	1.20282e-05	At2g44450	K01188 beta-glucosidase [EC:3.2.1.21] | (RefSeq) cyanogenic beta-glucosidase (A)
GLYMA_11G129800	2578	16.1067	37.9767	453.667	1014.67	1.20011	up	5.20566e-09	8.38037e-07	At2g44450	K01188 beta-glucosidase [EC:3.2.1.21] | (RefSeq) cyanogenic beta-glucosidase (A)
GLYMA_11G137000	6657	0.89	0.4	56.3333	23.6667	-1.19667	down	0.00182196	0.0294991	At2g29190	K17943 pumilio RNA-binding family | (RefSeq) pumilio homolog 2 (A)
GLYMA_11G142200	778	1.25	4.78667	17.3333	64	1.89941	up	0.00026684	0.00696506	--	--
GLYMA_11G143300	2530	5.17333	1.97	114.333	41.3333	-1.42411	down	7.85363e-07	5.73954e-05	At2g28690	--
GLYMA_11G144600	2552	4.07667	14.4967	186	626	1.79637	up	6.36729e-21	2.17309e-17	At5g59730	K07195 exocyst complex component 7 | (RefSeq) exocyst complex component EXO70H1 (A)
GLYMA_11G148500	879	0.446667	1.73667	7	26	1.93052	up	0.00194767	0.0311636	At5g03170	--
GLYMA_11G148700	1365	0.193333	0.87	4.66667	20	2.15111	up	0.00203991	0.0321126	At5g03170	--
GLYMA_11G175900	2837	2.23667	7.12	79	236.333	1.63657	up	1.35028e-06	9.19833e-05	At5g58860	K15401 long-chain fatty acid omega-monooxygenase [EC:1.14.14.80] | (RefSeq) cytochrome P450 86A1 (A)
GLYMA_11G185000	7179	0.943333	2.75	32.3333	89.6667	1.51822	up	0.00156116	0.0263506	At4g33790	K13356 alcohol-forming fatty acyl-CoA reductase [EC:1.2.1.84] | (RefSeq) alcohol-forming fatty acyl-CoA reductase (A)
GLYMA_11G208700	1449	85.3	39.4433	1504.67	660.333	-1.14688	down	1.64781e-09	3.02355e-07	At5g56550	--
GLYMA_11G211100	8677	48.9633	24.9467	3240	1564.67	-1.00877	down	3.8205e-07	3.19583e-05	At5g49760	K13430 serine/threonine-protein kinase PBS1 [EC:2.7.11.1] | (RefSeq) serine/threonine protein kinase (A)
GLYMA_11G215200	2618	4.66	13.61	218	600	1.51243	up	4.82795e-15	4.7078e-12	At1g66180	K22683 aspartyl protease family protein [EC:3.4.23.-] | (RefSeq) aspartyl protease family protein 2 (A)
GLYMA_11G217000	7185	3.56667	7.39	207.333	404	1.0127	up	0.000302923	0.00765811	At5g62950	--
GLYMA_11G217100	192	7.45667	19.6133	25.6667	63.3333	1.36407	up	0.000222599	0.00601035	--	--
GLYMA_11G218600	3498	1.88333	0.74	38	14	-1.39052	down	0.00217766	0.0337059	At1g66480	--
GLYMA_11G218800	917	2.01667	0.773333	33	12	-1.41766	down	0.00271471	0.0396383	At1g23000	--
GLYMA_11G230300	1875	1.84	5.68333	61.6667	179.333	1.59321	up	1.52673e-09	2.83184e-07	At3g55950	K13436 pto-interacting protein 1 [EC:2.7.11.1] | (RefSeq) serine/threonine protein kinase (A)
GLYMA_11G233300	1218	33.6567	14.6767	734	304	-1.23744	down	4.93924e-09	7.98917e-07	At2g38310	K14496 abscisic acid receptor PYR/PYL family | (RefSeq) abscisic acid receptor PYL4 (A)
GLYMA_11G236500	545	33.67	15.9833	327.667	147.667	-1.1121	down	1.21341e-08	1.73274e-06	--	--
GLYMA_11G243400	846	1.80333	5.11333	27.3333	72.6667	1.4691	up	0.000222207	0.00600451	At2g04240	K16285 RING/U-box domain-containing protein [EC:2.3.2.27] | (RefSeq) RING/U-box superfamily protein (A)
GLYMA_11G244900	2523	4.90667	2.05	163	64.6667	-1.2928	down	5.05934e-07	3.95126e-05	At5g63180	K01728 pectate lyase [EC:4.2.2.2] | (RefSeq) probable pectate lyase 5 (A)
GLYMA_11G250200	2248	2.25333	4.97667	76.6667	161.667	1.10745	up	0.00216305	0.0335558	At1g13710	K20619 cytochrome P450 family 78 subfamily A | (RefSeq) CYP78A10; cytochrome P450 family protein CYP78A10 (A)
GLYMA_11G252100	1360	5.90333	14.2167	143.667	326	1.23313	up	1.5075e-06	0.00010108	At3g48660	--
GLYMA_12G021000	1825	2.09667	0.99	60	27	-1.11269	down	0.00324632	0.0453887	At2g43250	--
GLYMA_12G030700	1042	1.82	0.52	34	9.33333	-1.83177	down	0.00119971	0.0215499	At4g36040	K03686 molecular chaperone DnaJ | (RefSeq) chaperone protein dnaJ A6, chloroplastic (A)
GLYMA_12G031300	4523	2.91333	1.3	197.667	83.6667	-1.20368	down	1.76644e-06	0.000113964	At4g34950	--
GLYMA_12G036100	965	1.25333	0.316667	20.6667	5	-2.02288	down	0.00309675	0.0438361	At2g16570	K00764 amidophosphoribosyltransferase [EC:2.4.2.14] | (RefSeq) amidophosphoribosyltransferase 1 (A)
GLYMA_12G042400	5448	2.19667	1.07333	104.667	48.6667	-1.06221	down	0.00238228	0.0360074	At4g39210	K00975 glucose-1-phosphate adenylyltransferase [EC:2.7.7.27] | (RefSeq) glucose-1-phosphate adenylyltransferase large subunit 1 (A)
GLYMA_12G043500	1920	16.11	5.45667	553.333	179	-1.59624	down	2.55443e-11	9.00399e-09	At3g50780	--
GLYMA_12G046800	1012	0.57	1.96667	10.3333	33.3333	1.74024	up	0.00182984	0.0295694	At5g66580	--
GLYMA_12G047400	8159	0.583333	1.59333	33.6667	86.3333	1.41503	up	0.000104907	0.00331208	At1g49430	K01897 long-chain acyl-CoA synthetase [EC:6.2.1.3] | (RefSeq) long chain acyl-CoA synthetase 2 (A)
GLYMA_12G052100	2236	11.3467	26.76	135	301	1.19832	up	1.75373e-07	1.66721e-05	At4g12860	K13448 calcium-binding protein CML | (RefSeq) calmodulin-like protein 3 (A)
GLYMA_12G054000	4049	78.7333	37.6333	2879.33	1307.33	-1.10237	down	9.45386e-07	6.75002e-05	At2g44480	K01188 beta-glucosidase [EC:3.2.1.21] | (RefSeq) cyanogenic beta-glucosidase (A)
GLYMA_12G054700	7934	3.73	1.33333	204.333	68.6667	-1.51868	down	5.91425e-10	1.28109e-07	At3g45140	K00454 lipoxygenase [EC:1.13.11.12] | (RefSeq) linoleate 13S-lipoxygenase 2-1, chloroplastic (A)
GLYMA_12G065500	744	2.93	7.30333	39	93	1.28247	up	0.000595942	0.0129104	--	--
GLYMA_12G068900	1114	0.57	1.84333	11.3333	35	1.66267	up	0.00160418	0.0269302	At5g03170	--
GLYMA_12G078900	2246	0.0833333	1.49	2	33	4.14802	up	3.54315e-05	0.00136483	At5g60770	K02575 MFS transporter, NNP family, nitrate/nitrite transporter | (RefSeq) high affinity nitrate transporter 2.4 (A)
GLYMA_12G087400	7082	0.856667	3.41333	29	108.667	1.96129	up	2.25286e-07	2.06134e-05	At4g33790	K13356 alcohol-forming fatty acyl-CoA reductase [EC:1.2.1.84] | (RefSeq) alcohol-forming fatty acyl-CoA reductase (A)
GLYMA_12G095000	1215	2.07	0.593333	45	12.3333	-1.84012	down	0.000105978	0.00333357	At3g11840	--
GLYMA_12G102300	4079	2.61333	5.65333	132.333	270.667	1.0797	up	2.10641e-07	1.93772e-05	At3g22104	--
GLYMA_12G109700	5683	0.55	1.16333	33	66	1.04401	up	0.000817313	0.0161892	At1g03620	K23538 ELMO domain-containing protein | (RefSeq) ELMO domain-containing protein A isoform X2 (A)
GLYMA_12G110000	225	18.86	9.53333	76	36.3333	-1.01693	down	0.00147703	0.0252173	--	--
GLYMA_12G112000	3371	21.4667	8.46667	1296	486.333	-1.37765	down	7.92809e-13	4.22778e-10	At4g03510	K10666 E3 ubiquitin-protein ligase RNF5 [EC:2.3.2.27] | (RefSeq) E3 ubiquitin-protein ligase RMA1H1-like (A)
GLYMA_12G119200	1092	29.3067	60.6733	571.667	1118.67	1.01811	up	1.94324e-08	2.55735e-06	At1g28480	K03676 glutaredoxin 3 | (RefSeq) glutaredoxin-C9 (A)
GLYMA_12G150500	2313	13.8233	7.05	256	123.333	-1.00773	down	1.0415e-06	7.35932e-05	At4g27450	--
GLYMA_12G188800	3855	2.24	6.02	86	217.667	1.38959	up	2.78647e-11	9.63985e-09	At2g35940	--
GLYMA_12G192600	2132	31.8467	15.8233	682.667	319	-1.04655	down	4.13869e-07	3.38727e-05	At5g42570	K14009 B-cell receptor-associated protein 31 | (RefSeq) B-cell receptor-associated protein 31 (A)
GLYMA_12G196600	1512	10.2867	23.1333	208	444	1.1278	up	7.52786e-07	5.53703e-05	At2g32300	--
GLYMA_12G201000	929	19	9.50667	316.333	151	-1.03462	down	0.000113249	0.00351052	At4g28240	--
GLYMA_12G205600	216	26.8967	6.69333	103.667	24.6667	-2.05256	down	1.2606e-06	8.63915e-05	--	--
GLYMA_12G205700	1600	4.36667	1.59667	124.667	43.6667	-1.49048	down	8.55163e-05	0.0027929	At1g03790	K23047 E3 ubiquitin-protein ligase UNKL [EC:2.3.2.27] | (RefSeq) zinc finger CCCH domain-containing protein 2 (A)
GLYMA_12G209000	948	0.513333	1.63333	8.66667	26.3333	1.64578	up	0.0031511	0.044403	--	--
GLYMA_12G216100	3582	85.5333	41.55	5485.33	2520.33	-1.0758	down	2.94688e-06	0.000174305	At5g48150	K14494 DELLA protein | (RefSeq) DELLA protein 2 (A)
GLYMA_12G217500	744	65.3967	151.98	869.333	1909.33	1.18243	up	3.82601e-14	3.03669e-11	At4g27280	K24345 calcium-binding protein KIC and related proteins | (RefSeq) calcium-binding EF-hand family protein (A)
GLYMA_12G218200	2505	0.496667	1.40667	13.6667	36.6667	1.46658	up	0.000725382	0.0149406	At4g21440	K09422 transcription factor MYB, plant | (RefSeq) MYB/HD-like transcription factor (A)
GLYMA_12G221200	1886	8.31	18.33	280.333	582	1.1043	up	7.25979e-08	7.86569e-06	--	--
GLYMA_12G221500	2114	59.7067	17.93	1685	480.667	-1.77411	down	5.58911e-19	1.3625e-15	At3g15500	--
GLYMA_12G225700	712	1.53	4.33	19.3333	52.3333	1.45859	up	0.00175396	0.0287516	--	--
GLYMA_12G230100	739	2.09667	5.04333	27.6667	63	1.22602	up	0.00279398	0.0405942	--	--
GLYMA_13G029200	4097	0.743333	1.93333	22.6667	55.3333	1.34551	up	0.000724784	0.0149373	At3g63470	K16297 serine carboxypeptidase-like clade II [EC:3.4.16.-] | (RefSeq) serine carboxypeptidase 1 (A)
GLYMA_13G030900	1865	145.72	64.9733	3300	1388	-1.19842	down	3.42283e-17	4.67272e-14	At1g01720	--
GLYMA_13G031000	2100	2.47	0.706667	93	25.3333	-1.83532	down	9.8815e-09	1.4624e-06	At2g15540	--
GLYMA_13G035100	1130	9.08	3.08333	183.667	59	-1.59295	down	4.64009e-13	2.73037e-10	At1g21550	K13448 calcium-binding protein CML | (RefSeq) probable calcium-binding protein CML44 (A)
GLYMA_13G035900	4599	2.98	10.2333	143.667	468.667	1.74437	up	1.72127e-13	1.21113e-10	At1g21270	K13436 pto-interacting protein 1 [EC:2.7.11.1] | (RefSeq) pto-interacting protein 1-like (A)
GLYMA_13G036100	4772	1.8	3.69	42.6667	82	1.00495	up	0.0032618	0.0455014	At1g76980	--
GLYMA_13G039800	1090	2.31333	0.503333	45	9.33333	-2.24493	down	6.33654e-05	0.00218887	At1g21320_1	K20725 MAP kinase substrate 1 | (RefSeq) nuclear speckle RNA-binding protein B (A)
GLYMA_13G040400	1793	0.213333	1.30333	7	39.3333	2.5553	up	4.90286e-06	0.000266873	At5g53290	K13434 pathogenesis-related genes transcriptional activator PTI6 | (RefSeq) pathogenesis-related genes transcriptional activator PTI6 (A)
GLYMA_13G051900	1855	1.16333	2.88667	36	84.3333	1.27736	up	0.000429993	0.0100104	At5g15780	--
GLYMA_13G077800	5466	0.953333	2.68	28.3333	75.3333	1.44706	up	0.000234631	0.00624141	At4g08290	--
GLYMA_13G081100	5036	3.26	10.6633	60	187	1.6757	up	7.13909e-07	5.30727e-05	At4g08290	--
GLYMA_13G087200	6968	0.73	1.6	60	123	1.09047	up	0.00274569	0.0399947	At1g22150	K17470 sulfate transporter 1, high-affinity | (RefSeq) sulfate transporter 1.3 isoform X1 (A)
GLYMA_13G092500	2760	26.4967	11.0167	1263.33	499.333	-1.30146	down	8.79273e-10	1.85239e-07	At2g18700	K16055 trehalose 6-phosphate synthase/phosphatase [EC:2.4.1.15 3.1.3.12] | (RefSeq) probable alpha,alpha-trehalose-phosphate synthase [UDP-forming] 11 (A)
GLYMA_13G095100	348	214.2	466.25	1333	2736.33	1.08588	up	5.76112e-10	1.26039e-07	At4g25810	K14504 xyloglucan:xyloglucosyl transferase TCH4 [EC:2.4.1.207] | (RefSeq) LOW QUALITY PROTEIN: probable xyloglucan endotransglucosylase/hydrolase protein 23 (A)
GLYMA_13G095200	1562	120.373	264.883	2804	5807.67	1.10166	up	3.6603e-08	4.41421e-06	At4g25810	K08235 xyloglucan:xyloglucosyl transferase [EC:2.4.1.207] | (RefSeq) probable xyloglucan endotransglucosylase/hydrolase protein 23 (A)
GLYMA_13G101300	4260	0.943333	2.13667	58.3333	124.667	1.14748	up	1.1664e-05	0.000546065	At4g29920	K03695 ATP-dependent Clp protease ATP-binding subunit ClpB | (RefSeq) chaperone protein ClpB1 isoform X1 (A)
GLYMA_13G110500	3585	16.7167	8.32	578.667	274.333	-1.04725	down	1.88898e-06	0.000120503	At3g43850	--
GLYMA_13G116700	4165	0.183333	0.753333	7.33333	29	2.00431	up	0.00180424	0.0293363	At1g11910	K08245 phytepsin [EC:3.4.23.40] | (RefSeq) cyprosin isoform X2 (A)
GLYMA_13G123000	832	4.32333	2.18667	64.3333	30.6667	-1.02041	down	0.00211221	0.0329317	At3g23230	K09286 EREBP-like factor | (RefSeq) ethylene-responsive transcription factor 5-like protein (A)
GLYMA_13G132500	4234	0.5	3.04667	17	99	2.57376	up	2.20046e-12	1.05774e-09	At2g37460	--
GLYMA_13G133000	531	3.01667	16.81	28.6667	150	2.44374	up	2.70813e-14	2.29628e-11	At2g28200	--
GLYMA_13G133100	939	10.3067	25.4667	173	402.333	1.27055	up	8.53243e-09	1.29424e-06	At3g53600	--
GLYMA_13G143100	539	0.383333	2.39333	3.66667	21.6667	2.61034	up	0.0018404	0.0296838	At3g09870	K14488 SAUR family protein | (RefSeq) auxin-responsive protein SAUR32 (A)
GLYMA_13G143200	602	5.54	16.3867	53.6667	150.333	1.52081	up	2.83059e-05	0.00114103	At3g09870	K14488 SAUR family protein | (RefSeq) auxin-responsive protein SAUR32 (A)
GLYMA_13G158100	517	2.65333	10.8033	24.6667	93.6667	1.99507	up	3.91503e-07	3.24495e-05	--	--
GLYMA_13G161500	3095	0.286667	1.43	9	41.6667	2.28548	up	4.53027e-05	0.00166789	At5g20270	K07297 adiponectin receptor | (RefSeq) heptahelical transmembrane protein 1 (A)
GLYMA_13G162600	3185	0.58	1.43	20	46.6667	1.26837	up	0.00133823	0.0234217	At5g20410	K03715 1,2-diacylglycerol 3-beta-galactosyltransferase [EC:2.4.1.46] | (RefSeq) monogalactosyldiacylglycerol synthase 2, chloroplastic (A)
GLYMA_13G165700	3098	0.71	1.45333	31.6667	61.3333	1.0001	up	0.00230489	0.0351177	At1g02630	K15014 solute carrier family 29 (equilibrative nucleoside transporter), member 1/2/3 | (RefSeq) equilibrative nucleotide transporter 8 (A)
GLYMA_13G168200	1987	5.3	1.46667	142.667	37.3333	-1.88534	down	7.46081e-08	8.00723e-06	At1g80160	K08234 glyoxylase I family protein | (RefSeq) GLYI-18; putative lactoylglutathione lyase (A)
GLYMA_13G171400	631	7.28667	2.45667	82.3333	26.3333	-1.59732	down	1.55218e-06	0.000103466	--	--
GLYMA_13G172500	4370	0.463333	1.94333	11.3333	45.3333	2.04265	up	1.12481e-05	0.00053023	At5g45960	--
GLYMA_13G174400	2446	1.6	0.816667	70	34	-1.00104	down	0.00107887	0.0200112	At3g02400	--
GLYMA_13G176400	2488	122.16	54.5333	5436.67	2293.33	-1.19902	down	3.46696e-10	7.83602e-08	CE01921	K08770 ubiquitin C | (RefSeq) polyubiquitin 3 (A)
GLYMA_13G179200	2737	31.2633	12.2067	736.667	274	-1.39194	down	1.13179e-09	2.23276e-07	At4g32480	--
GLYMA_13G181000	3226	68.03	23.7433	1835.33	608.333	-1.55455	down	1.32048e-14	1.21802e-11	At4g27450	--
GLYMA_13G186500	9029	0.776667	1.70667	34.3333	71	1.09464	up	0.000386348	0.00920664	At5g13750	--
GLYMA_13G203000	6223	1.44667	5.63	68	249.333	1.9156	up	0.00117692	0.0212525	At3g08040	--
GLYMA_13G204400	4384	16.65	7.50333	779.667	333.333	-1.18744	down	6.05127e-06	0.000317465	At2g42280	K16189 phytochrome-interacting factor 4 | (RefSeq) transcription factor PIF4 isoform X2 (A)
GLYMA_13G206500	5339	4.12667	1.83	266.667	112.333	-1.214	down	6.4745e-07	4.91041e-05	At4g04880	K01488 adenosine deaminase [EC:3.5.4.4] | (RefSeq) N6-mAMP deaminase (A)
GLYMA_13G213300	4968	45.29	22.9467	1436	689.667	-1.01368	down	1.37394e-08	1.92177e-06	At5g18840	K03444 MFS transporter, SP family, ERD6-like sugar transporter | (RefSeq) sugar transporter ERD6-like 16 (A)
GLYMA_13G221900	4197	2.31333	7.09333	77.3333	221.667	1.58145	up	2.82687e-05	0.00114103	At2g22920	K16296 serine carboxypeptidase-like clade I [EC:3.4.16.-] | (RefSeq) serine carboxypeptidase-like 12 isoform X1 (A)
GLYMA_13G222100	4709	6.84667	2.67333	165.333	62	-1.39649	down	0.000117397	0.00361668	At1g17020	K05278 flavonol synthase [EC:1.14.20.6] | (RefSeq) flavonol synthase/flavanone 3-hydroxylase (A)
GLYMA_13G222600	1285	3.59	1.12667	82.6667	24.6667	-1.70453	down	4.21815e-07	3.42968e-05	At2g34340	--
GLYMA_13G224000	2070	6.60333	14.4667	202.667	418	1.09495	up	9.18494e-08	9.53011e-06	At1g16030	K03283 heat shock 70kDa protein 1/2/6/8 | (RefSeq) heat shock 70 kDa protein-like (A)
GLYMA_13G224400	3647	0.69	1.86667	35	90	1.40496	up	8.6269e-07	6.22468e-05	At1g60500	K17065 dynamin 1-like protein [EC:3.6.5.5] | (RefSeq) dynamin-related protein 3A (A)
GLYMA_13G226700	1334	1.11667	2.68667	26.6667	60.6667	1.2263	up	0.000271188	0.00705439	--	--
GLYMA_13G238500	2347	19.1667	8.13667	474	191	-1.26833	down	2.08115e-10	5.31621e-08	At4g32480	--
GLYMA_13G242100	2242	34.8067	9.63667	1059.33	279	-1.88699	down	2.43405e-18	4.36129e-15	At4g27450	K01953 asparagine synthase (glutamine-hydrolysing) [EC:6.3.5.4] | (RefSeq) AS2; asparagine synthetase 2 (A)
GLYMA_13G251700	777	2.98333	0.656667	41.3333	8.66667	-2.21639	down	6.78864e-06	0.000345805	At3g19690	K13449 pathogenesis-related protein 1 | (RefSeq) PR1-3; pathogenesis-related protein 1 precursor (A)
GLYMA_13G257600	697	6.51333	31.0867	80.6667	362.333	2.21597	up	0.000528619	0.0117456	--	--
GLYMA_13G257800	983	4.04333	13.7067	70.6667	225.333	1.72652	up	6.28192e-06	0.000326325	--	--
GLYMA_13G259500	1987	2.93333	1.20333	75	29	-1.31768	down	4.91887e-05	0.00178024	At1g78440	K04125 gibberellin 2beta-dioxygenase [EC:1.14.11.13] | (RefSeq) GA2OX7; gibberellin 2-beta-dioxygenase 1 (A)
GLYMA_13G261100	1913	1.14	0.46	39	15	-1.34423	down	0.00260236	0.0384152	At3g14580	--
GLYMA_13G267300	508	24.6067	8.96	223.333	77	-1.48951	down	4.44556e-07	3.56994e-05	--	--
GLYMA_13G267700	1796	1.04	5.64	20.6667	107.667	2.4044	up	1.47188e-09	2.7601e-07	At3g56400	K13424 WRKY transcription factor 33 | (RefSeq) WRKY39; WRKY transcription factor 39 (A)
GLYMA_13G279900	1664	63.1233	19.4133	1684	492	-1.73773	down	5.64337e-20	1.75093e-16	At3g15500	--
GLYMA_13G282100	2358	0.436667	1.31333	10.6667	30.3333	1.55022	up	0.00137815	0.0238877	At4g21440	K09422 transcription factor MYB, plant | (RefSeq) transcription factor MYB41 (A)
GLYMA_13G283200	4268	0.643333	1.66	31.3333	76	1.32803	up	0.000196453	0.00543774	At4g27290	K13430 serine/threonine-protein kinase PBS1 [EC:2.7.11.1] | (RefSeq) serine/threonine-protein kinase PBS1 isoform X2 (A)
GLYMA_13G283600	1652	38.8267	104.68	1146.67	2917.33	1.39729	up	1.34198e-17	1.99133e-14	At5g54490	K24345 calcium-binding protein KIC and related proteins | (RefSeq) calcium-binding protein PBP1-like protein (A)
GLYMA_13G295000	5094	1.32333	2.84	40.3333	82	1.06585	up	0.00159422	0.0268158	At5g53970	K00815 tyrosine aminotransferase [EC:2.6.1.5] | (RefSeq) nicotianamine aminotransferase 1 (A)
GLYMA_13G296800	408	32.5567	3.62	238.333	25	-3.20509	down	1.73707e-28	5.92846e-24	At4g28310	--
GLYMA_13G301200	1212	26.42	12.4767	574	256.667	-1.11693	down	1.78695e-09	3.20983e-07	At4g28240	--
GLYMA_13G305600	1651	7.13	15.5833	149.333	309.333	1.08903	up	9.35063e-08	9.64132e-06	At2g32300	--
GLYMA_13G317700	4784	0.163333	1.05	5.33333	32.6667	2.64643	up	2.8584e-05	0.00115041	At4g33790	K13356 alcohol-forming fatty acyl-CoA reductase [EC:1.2.1.84] | (RefSeq) fatty acyl-CoA reductase 3 isoform X1 (A)
GLYMA_13G330200	3828	1.41667	3.92333	48.3333	126.333	1.43088	up	4.05652e-05	0.00151804	At1g07870	K13430 serine/threonine-protein kinase PBS1 [EC:2.7.11.1] | (RefSeq) serine/threonine-protein kinase (A)
GLYMA_13G338300	1908	11.21	3.80667	278.667	91	-1.59165	down	5.09897e-06	0.000275789	At1g55910	K14709 solute carrier family 39 (zinc transporter), member 1/2/3 | (RefSeq) zinc transporter 1 (A)
GLYMA_13G340800	2420	1.24	2.85667	29.6667	64.6667	1.1703	up	0.00027954	0.0072276	At3g57670	--
GLYMA_13G347600	4270	0.536667	0.0733333	28.6667	3.66667	-2.92175	down	0.000200298	0.00552625	At1g55020	K15718 linoleate 9S-lipoxygenase [EC:1.13.11.58] | (RefSeq) LOX1.1; seed linoleate 13S-lipoxygenase-1 (A)
GLYMA_13G351600	2444	1.86667	5.67667	38.3333	109.667	1.55698	up	0.000246634	0.00650261	At1g17710	K13248 pyridoxal phosphate phosphatase PHOSPHO2 [EC:3.1.3.74] | (RefSeq) inorganic pyrophosphatase 2-like (A)
GLYMA_13G360000	5370	3.62667	8.79667	157.333	361	1.24207	up	8.45648e-11	2.4253e-08	At3g15990	K17471 sulfate transporter 3 | (RefSeq) probable sulfate transporter 3.4 (A)
GLYMA_13G360600	1835	19.1367	9.68667	628	299.667	-1.01676	down	2.9055e-07	2.50409e-05	At1g80440	--
GLYMA_14G010000	3940	0.736667	1.95667	36.6667	91.6667	1.36339	up	0.000370845	0.00893571	At3g20910	K08064 nuclear transcription factor Y, alpha | (RefSeq) NF-YA14; nuclear transcription factor Y subunit A-14 (A)
GLYMA_14G010500	4395	50.9967	25.71	2587.33	1231.33	-1.02336	down	1.73885e-13	1.21113e-10	At1g55740	K06617 raffinose synthase [EC:2.4.1.82] | (RefSeq) probable galactinol--sucrose galactosyltransferase 1 (A)
GLYMA_14G016000	3408	7.95333	2.95667	485	171	-1.46476	down	3.91165e-12	1.78001e-09	At5g48150	K14494 DELLA protein | (RefSeq) DELLA protein 1 (A)
GLYMA_14G016300	3259	129.32	265.75	7535.67	14623	1.00679	up	1.31423e-11	4.98371e-09	At2g40140	K23047 E3 ubiquitin-protein ligase UNKL [EC:2.3.2.27] | (RefSeq) zinc finger CCCH domain-containing protein 2 (A)
GLYMA_14G023000	1327	8.79667	4.1	208.667	92.6667	-1.13686	down	6.4346e-07	4.89102e-05	At4g38460	K13789 geranylgeranyl diphosphate synthase, type II [EC:2.5.1.1 2.5.1.10 2.5.1.29] | (RefSeq) GPPS; geranyl-diphosphate synthase (A)
GLYMA_14G027000	1447	2.28667	5.35667	31.6667	70.6667	1.18462	up	0.00215984	0.0335213	At1g74520	K17279 receptor expression-enhancing protein 5/6 | (RefSeq) HVA22-like protein f (A)
GLYMA_14G028300	2595	0.193333	1.06333	7.33333	38.3333	2.43624	up	2.6215e-06	0.000157516	At1g06520	K13508 glycerol-3-phosphate acyltransferase [EC:2.3.1.15 2.3.1.198] | (RefSeq) glycerol-3-phosphate acyltransferase 1 (A)
GLYMA_14G039800	737	5.68	1.90667	59.6667	19	-1.61268	down	9.85481e-06	0.000477071	--	--
GLYMA_14G043200	3356	0.943333	2.68667	13.6667	36.3333	1.47435	up	0.00213306	0.0332112	--	K00021 hydroxymethylglutaryl-CoA reductase (NADPH) [EC:1.1.1.34] | (RefSeq) 3-hydroxy-3-methylglutaryl-coenzyme A reductase 1 (A)
GLYMA_14G055200	964	108.147	52.88	1698.67	788	-1.06889	down	1.70621e-12	8.31876e-10	At2g41430	--
GLYMA_14G058700	3739	54.8433	24.7867	1592.33	685	-1.18495	down	4.61856e-07	3.66574e-05	At5g05600	K24028 salicylic acid 3-hydroxylase [EC:1.14.11.-] | (RefSeq) protein DMR6-LIKE OXYGENASE 2 (A)
GLYMA_14G067200	2412	2.15333	5.05333	69	152	1.19351	up	0.00297455	0.0426019	At3g11430	K13508 glycerol-3-phosphate acyltransferase [EC:2.3.1.15 2.3.1.198] | (RefSeq) glycerol-3-phosphate acyltransferase 5 (A)
GLYMA_14G069200	3134	44.0233	20.8733	867	390	-1.11383	down	7.21305e-12	3.00213e-09	At1g66480	--
GLYMA_14G071400	1733	2.56	5.9	79.3333	174	1.16906	up	3.08557e-06	0.00018063	At1g75390	--
GLYMA_14G071600	3116	0.63	1.51333	20.6667	47	1.22948	up	0.0035687	0.0485968	At1g27620	K15400 omega-hydroxypalmitate O-feruloyl transferase [EC:2.3.1.188] | (RefSeq) omega-hydroxypalmitate O-feruloyl transferase (A)
GLYMA_14G088300	1097	123.56	272.767	2425.33	5039.33	1.10663	up	1.84464e-10	4.93842e-08	At5g04340	--
GLYMA_14G089800	2129	4	18.9167	151.333	671	2.20839	up	0.00145234	0.024908	--	--
GLYMA_14G092800	7461	3.64	7.92667	222.667	460	1.09293	up	2.60858e-05	0.00106493	At4g32940	K01369 legumain [EC:3.4.22.34] | (RefSeq) VPE2; vacuolar processing enzyme 2 precursor (A)
GLYMA_14G098200	2903	32.4067	15.1733	1212	541.667	-1.13215	down	5.82675e-06	0.000307835	At3g43850	--
GLYMA_14G098700	854	4.49	10.2233	68.6667	147.333	1.1485	up	3.83338e-05	0.00144883	--	--
GLYMA_14G123900	984	1.57667	4.23333	27.6667	70	1.39794	up	0.000273189	0.00710103	At5g53290	K13434 pathogenesis-related genes transcriptional activator PTI6 | (RefSeq) pathogenesis-related genes transcriptional activator PTI6 (A)
GLYMA_14G130800	2671	0.536667	1.14667	24.6667	49.6667	1.05798	up	0.00339062	0.0467359	At5g11460	--
GLYMA_14G133300	237	1.57667	8.63667	6.66667	35	2.42424	up	0.000523346	0.0116664	At5g24860	--
GLYMA_14G139400	3624	2.86667	8.61	58.6667	167.333	1.55056	up	4.82655e-11	1.52524e-08	At5g10580	--
GLYMA_14G147500	1515	0.9	2.08333	24.3333	53.3333	1.17113	up	0.00332034	0.0460463	At1g77640	K09286 EREBP-like factor | (RefSeq) ethylene-responsive transcription factor ERF011 (A)
GLYMA_14G148100	6277	4.16	16.9333	113	436.667	1.99197	up	4.15479e-13	2.4877e-10	At4g08290	--
GLYMA_14G148200	2362	0.43	1.06667	17.3333	40.6667	1.27327	up	0.00137536	0.0238514	At5g61540	K01444 N4-(beta-N-acetylglucosaminyl)-L-asparaginase [EC:3.5.1.26] | (RefSeq) probable isoaspartyl peptidase/L-asparaginase 3 isoform X1 (A)
GLYMA_14G158600	3543	31.2667	15.5533	1581	744.333	-1.04283	down	3.16799e-05	0.00125013	At1g21230	K13436 pto-interacting protein 1 [EC:2.7.11.1] | (RefSeq) PTI1-like tyrosine-protein kinase 3-like (A)
GLYMA_14G162100	3261	0.41	1.97333	13.6667	61.6667	2.22891	up	3.11503e-05	0.00123821	At5g59220	K14497 protein phosphatase 2C [EC:3.1.3.16] | (RefSeq) probable protein phosphatase 2C 51 (A)
GLYMA_14G168100	3078	1.21333	0.48	67	24.6667	-1.38249	down	0.000195424	0.00542247	At1g22110	--
GLYMA_14G174400	3821	1.83	3.81	112	220	1.02309	up	4.41267e-07	3.55189e-05	At1g78230	--
GLYMA_14G175400	2323	170.043	85.57	5523	2630	-1.02842	down	1.14876e-09	2.24034e-07	At1g22360	K13691 pathogen-inducible salicylic acid glucosyltransferase [EC:2.4.1.-] | (RefSeq) UDP-glycosyltransferase 74G1 (A)
GLYMA_14G176300	1712	27.2067	79.0067	832.667	2272.67	1.50141	up	5.72827e-09	9.13552e-07	At4g08950	--
GLYMA_14G181400	2751	1.90333	5.32333	32	84	1.44671	up	0.000157684	0.0045762	At4g33580	K01673 carbonic anhydrase [EC:4.2.1.1] | (RefSeq) beta carbonic anhydrase 5, chloroplastic isoform X1 (A)
GLYMA_14G185100	2541	2.04333	0.786667	61.6667	22.6667	-1.41384	down	0.000394509	0.00933069	At5g65640	K13422 transcription factor MYC2 | (RefSeq) transcription factor MYC1 (A)
GLYMA_14G193400	5169	0.216667	1.26	7.66667	42.6667	2.50111	up	1.51545e-05	0.000679644	At2g38170	K07300 Ca2+:H+ antiporter | (RefSeq) vacuolar cation/proton exchanger 3 (A)
GLYMA_14G195000	6771	9.40667	43.0433	366.667	1577.67	2.15338	up	0.000672094	0.0141156	At3g47340	K01953 asparagine synthase (glutamine-hydrolysing) [EC:6.3.5.4] | (RefSeq) AS2; asparagine synthetase 2 (A)
GLYMA_14G209700	4508	8.77333	18.77	204.333	410.333	1.06079	up	0.000154452	0.00450154	At5g17230	K02291 15-cis-phytoene synthase [EC:2.5.1.32] | (RefSeq) phytoene synthase, chloroplastic-like (A)
GLYMA_15G007500	1311	44.8467	22.15	868	405	-1.05736	down	3.41572e-08	4.17832e-06	At3g15810	--
GLYMA_15G011200	4930	0.04	0.293333	2.33333	16	2.8248	up	0.00169689	0.0280587	At1g15460	K24194 boron transporter | (RefSeq) boron transporter 4 (A)
GLYMA_15G040700	887	2.64	7.75333	42	115.333	1.51612	up	0.000102437	0.00325518	At2g28710	--
GLYMA_15G042400	2384	1.16	2.76	49.3333	110.667	1.21626	up	0.000338009	0.00837148	At5g59730	K07195 exocyst complex component 7 | (RefSeq) exocyst complex component EXO70H1 (A)
GLYMA_15G051200	1524	2.57667	5.48333	46.3333	92.6667	1.05574	up	0.000698738	0.014541	At5g64530	--
GLYMA_15G055800	960	34.92	77.66	600	1254.67	1.1159	up	1.81091e-06	0.000116174	--	--
GLYMA_15G057300	835	6.41667	34.89	95.3333	485.667	2.40692	up	0.000169219	0.00482883	--	--
GLYMA_15G057400	333	6.29333	28.4333	37.3333	158.667	2.14122	up	1.98736e-09	3.51432e-07	--	--
GLYMA_15G057500	778	11.82	40.2	163.667	523.667	1.72973	up	0.00107605	0.0199807	--	--
GLYMA_15G057700	4016	1.43667	3.22	53	112.333	1.12444	up	5.06667e-05	0.00182406	At1g58180	K01673 carbonic anhydrase [EC:4.2.1.1] | (RefSeq) beta carbonic anhydrase 5, chloroplastic isoform X2 (A)
GLYMA_15G071300	3518	150.953	53.52	8074	2719.33	-1.53116	down	2.65756e-18	4.36129e-15	At3g15450	K01953 asparagine synthase (glutamine-hydrolysing) [EC:6.3.5.4] | (RefSeq) AS2; asparagine synthetase 2 (A)
GLYMA_15G072400	1924	292.263	145.077	9101.33	4287	-1.04655	down	5.87582e-17	7.71292e-14	At4g27450	--
GLYMA_15G073100	2562	0.136667	1.55333	3.33333	34.6667	3.48206	up	0.000162112	0.00466503	At4g27450	--
GLYMA_15G074800	2458	27.6067	10.3567	547	195.333	-1.44836	down	4.89967e-13	2.81095e-10	At4g32480	--
GLYMA_15G082400	1812	9.94333	4.19333	175.667	70.3333	-1.2818	down	1.60791e-08	2.19506e-06	At2g34140	--
GLYMA_15G087300	2480	6.27333	3.09333	132.667	62	-1.06071	down	0.00112292	0.0205506	At4g18910	K09874 aquaporin NIP | (RefSeq) NIP1-4; nodulin-26 (A)
GLYMA_15G087600	4624	2.74333	0.996667	194	67	-1.5035	down	1.61385e-07	1.55152e-05	At2g14640_2	--
GLYMA_15G088000	2418	6.66333	14.1533	288	577.333	1.05187	up	5.09866e-10	1.12995e-07	At1g16030	K03283 heat shock 70kDa protein 1/2/6/8 | (RefSeq) heat shock 70 kDa protein-like (A)
GLYMA_15G093900	2446	24.3367	11.8767	654.667	301.667	-1.07198	down	8.12561e-08	8.57247e-06	At1g30040	K04125 gibberellin 2beta-dioxygenase [EC:1.14.11.13] | (RefSeq) GA2OX8; gibberellin 2-beta-dioxygenase 8 (A)
GLYMA_15G096500	2537	3.31	1.6	143.333	65.6667	-1.08423	down	4.89875e-06	0.000266873	--	--
GLYMA_15G098100	2859	50.06	23.1633	1825	800.667	-1.14632	down	7.31229e-14	5.42525e-11	At5g18670	K01177 beta-amylase [EC:3.2.1.2] | (RefSeq) beta-amylase 1, chloroplastic (A)
GLYMA_15G109900	1616	0.786667	1.86	22.6667	51	1.20931	up	0.000814437	0.016151	At4g04480	--
GLYMA_15G112500	2614	1.61	4.20667	42.6667	104.333	1.35584	up	0.000111777	0.00347728	At4g04020	--
GLYMA_15G118800	942	1.54667	4.36667	26	69.3333	1.45899	up	5.27303e-05	0.00188641	At4g14540	K08065 nuclear transcription Y subunit beta | (RefSeq) nuclear transcription factor Y subunit B-3 (A)
GLYMA_15G126400	1899	3.83333	1.94333	97.3333	46.6667	-1.01499	down	0.000690895	0.0144306	At4g19700	K19042 E3 ubiquitin-protein ligase BOI and related proteins [EC:2.3.2.27] | (RefSeq) BOI-related E3 ubiquitin-protein ligase 1 (A)
GLYMA_15G133700	4645	0.676667	1.73	40.6667	99	1.32508	up	1.96261e-05	0.000840426	At5g11720	K01187 alpha-glucosidase [EC:3.2.1.20] | (RefSeq) alpha-glucosidase (A)
GLYMA_15G143900	3860	1.16	3.79	21.3333	66.3333	1.66865	up	4.26817e-05	0.00157992	At5g49350	--
GLYMA_15G146000	944	1.44333	9.12667	20.3333	120.667	2.62459	up	2.13676e-08	2.78342e-06	--	--
GLYMA_15G156600	2643	0.423333	0.09	20	4	-2.24401	down	0.00290398	0.041833	At3g57430	K23541 Ca2+/H+ antiporter, TMEM165/GDT1 family | (RefSeq) putative pentatricopeptide repeat-containing protein At3g23330 (A)
GLYMA_15G179800	1310	3.66333	7.64333	71.6667	142	1.02835	up	8.19518e-05	0.00272075	At5g20700	--
GLYMA_15G180000	1202	3.73333	13.02	80.3333	263.333	1.76916	up	3.65492e-14	2.96997e-11	At1g19210	K09286 EREBP-like factor | (RefSeq) ethylene-responsive transcription factor ERF023 (A)
GLYMA_15G182000	15437	0.213333	0.66	16	46.6667	1.59941	up	0.00060949	0.0130572	At1g19230	K13447 respiratory burst oxidase [EC:1.6.3.- 1.11.1.-] | (RefSeq) respiratory burst oxidase homolog protein E isoform X1 (A)
GLYMA_15G191800	1522	2.81	8.39	42	118.333	1.54556	up	9.25011e-06	0.000451641	At4g20390	--
GLYMA_15G198500	1305	2.5	5.76667	58.3333	126.667	1.16604	up	0.00297461	0.0426019	At1g80520	--
GLYMA_15G214300	722	0	1.95	0	18	6.68792	up	5.83701e-06	0.0003079	At1g65800	K13430 serine/threonine-protein kinase PBS1 [EC:2.7.11.1] | (RefSeq) serine/threonine-protein kinase (A)
GLYMA_15G219400	17644	3.87	1.83667	193.333	87	-1.11298	down	9.89282e-05	0.0031782	At1g79380	K16280 E3 ubiquitin-protein ligase RGLG [EC:2.3.2.27] | (RefSeq) E3 ubiquitin-protein ligase RGLG4 isoform X1 (A)
GLYMA_15G223500	4595	5.65	2.54333	246.333	105.667	-1.18367	down	0.000170265	0.00484653	At3g10720	K01051 pectinesterase [EC:3.1.1.11] | (RefSeq) probable pectinesterase/pectinesterase inhibitor 47 (A)
GLYMA_15G232400	4466	3.19333	1.41	233	97.3333	-1.22146	down	3.7786e-05	0.00143608	At5g17680	--
GLYMA_15G245000	1060	0	3.42333	0	45.3333	8.04528	up	3.75028e-05	0.00143169	At3g14680	K17873 11-oxo-beta-amyrin 30-oxidase [EC:1.14.14.115] | (RefSeq) 11-oxo-beta-amyrin 30-oxidase (A)
GLYMA_15G245100	3667	0.02	9.07	0.666667	266	8.7595	up	3.85886e-06	0.00021661	At3g14630	K17873 11-oxo-beta-amyrin 30-oxidase [EC:1.14.14.115] | (RefSeq) 11-oxo-beta-amyrin 30-oxidase (A)
GLYMA_15G245300	5523	2.32	15.15	75.6667	458	2.68208	up	0.00131184	0.0230788	At3g14630	K17873 11-oxo-beta-amyrin 30-oxidase [EC:1.14.14.115] | (RefSeq) 11-oxo-beta-amyrin 30-oxidase (A)
GLYMA_15G250100	2715	1.76	4.7	85.3333	214.667	1.38621	up	2.69317e-07	2.3568e-05	At3g14440	K09840 9-cis-epoxycarotenoid dioxygenase [EC:1.13.11.51] | (RefSeq) 9-cis-epoxycarotenoid dioxygenase NCED1, chloroplastic (A)
GLYMA_15G252000	1327	0.126667	2.92667	2.66667	56	4.49504	up	4.68684e-08	5.45929e-06	At1g78380	K00799 glutathione S-transferase [EC:2.5.1.18] | (RefSeq) LOW QUALITY PROTEIN: glutathione S-transferase 3 (A)
GLYMA_15G256000	920	10.0367	21.5367	107.333	216	1.06809	up	0.000398392	0.0093926	--	--
GLYMA_15G262800	2565	0.283333	1.25	7	29.3333	2.10005	up	0.000139253	0.00413988	At3g12750	K14709 solute carrier family 39 (zinc transporter), member 1/2/3 | (RefSeq) zinc transporter 1 isoform X2 (A)
GLYMA_15G264300	4363	1.05	5.17333	23.6667	110.333	2.26064	up	3.89811e-06	0.000217739	At1g53920	--
GLYMA_15G267500	4330	0.703333	1.79667	27.6667	66.3333	1.32057	up	0.00239259	0.0361473	At2g31920	--
GLYMA_15G270000	799	1.33	3.89333	19	52.3333	1.51881	up	0.000152672	0.00446107	--	--
GLYMA_15G272600	788	60.2233	148.51	847	1973	1.2649	up	2.38239e-07	2.15102e-05	--	--
GLYMA_16G005200	1902	16.83	6.54333	573	211.333	-1.3971	down	9.14568e-17	1.15605e-13	At1g72820	K15121 solute carrier family 25, member 44 | (RefSeq) solute carrier family 25 member 44 (A)
GLYMA_16G011900	1113	1.02333	2.77667	20.3333	52	1.40158	up	0.00202843	0.0320088	At1g72430	K14488 SAUR family protein | (RefSeq) putative ARG7 auxin responsive family protein (A)
GLYMA_16G017500	2876	0.23	1.54333	5.33333	33.6667	2.70205	up	0.000409613	0.00959574	At4g10490	K24028 salicylic acid 3-hydroxylase [EC:1.14.11.-] | (RefSeq) protein DMR6-LIKE OXYGENASE 2 (A)
GLYMA_16G020200	7422	0.49	1.23	18.6667	44.3333	1.30099	up	0.00171101	0.0282101	At1g01140	K07198 5'-AMP-activated protein kinase, catalytic alpha subunit [EC:2.7.11.11] | (RefSeq) CBL-interacting protein kinase 2 (A)
GLYMA_16G021000	1134	1.82333	8.92333	30	138	2.25444	up	7.45467e-09	1.15122e-06	At3g61890	K09338 homeobox-leucine zipper protein | (RefSeq) homeobox-leucine zipper protein ATHB-12 (A)
GLYMA_16G022500	3417	0.196667	0.96	9	41.6667	2.25813	up	2.06196e-06	0.000130079	--	--
GLYMA_16G026400	3244	9.63	27.8433	314	853	1.50426	up	2.50869e-08	3.19474e-06	At2g46400	K13425 WRKY transcription factor 22 | (RefSeq) WRKY transcription factor 22 (A)
GLYMA_16G031400	2741	0.22	1.73333	3	22.3333	2.95495	up	0.000152902	0.00446399	At1g64000	K18835 WRKY transcription factor 2 | (RefSeq) WRKY59; probable WRKY transcription factor 2 (A)
GLYMA_16G042700	2493	13.2967	4.28667	313.333	96	-1.66791	down	1.85573e-14	1.62396e-11	At1g08570	K03671 thioredoxin 1 | (RefSeq) uncharacterized protein LOC100776312 (A)
GLYMA_16G043200	2348	9.16333	2.97667	277.333	85.6667	-1.65962	down	5.2966e-11	1.65842e-08	At3g04070	--
GLYMA_16G062400	1289	5.64667	11.6833	130.333	254	1.01613	up	3.35084e-06	0.000193504	At5g14280_2	--
GLYMA_16G063500	1532	2.39667	0.943333	65.6667	24.6667	-1.38226	down	0.000300262	0.00761037	At4g12560	--
GLYMA_16G070100	1728	8.07333	3.35667	171.333	67.6667	-1.30139	down	1.25511e-06	8.63624e-05	At5g01750	--
GLYMA_16G071200	1770	1.70333	0.533333	54	16	-1.70565	down	3.08549e-05	0.00123163	At5g40470	K10268 F-box and leucine-rich repeat protein 2/20 | (RefSeq) F-box/LRR-repeat protein 4 (A)
GLYMA_16G084700	2356	3.23667	8.07	87.3333	205.333	1.28493	up	1.72613e-09	3.12735e-07	At3g25250	K20714 serine/threonine-protein kinase OXI1 [EC:2.7.11.1] | (RefSeq) serine/threonine-protein kinase OXI1 (A)
GLYMA_16G092100	1498	0.553333	1.79333	10.6667	32.3333	1.65988	up	0.000931434	0.0179643	At3g02940	K09422 transcription factor MYB, plant | (RefSeq) transcription factor MYB53 (A)
GLYMA_16G134600	2778	2.32	0.773333	58.6667	18.6667	-1.62137	down	9.73639e-05	0.0031378	At1g19640	K21483 salicylate 1-O-methyltransferase [EC:2.1.1.274] | (RefSeq) S-adenosyl-L-methionine:benzoic acid/salicylic acid carboxyl methyltransferase 3 (A)
GLYMA_16G144900	3485	1.24667	6.44333	33	160.667	2.33971	up	4.35588e-12	1.95608e-09	At2g23540	--
GLYMA_16G148600	1860	16.5067	3.28667	250.333	47.6667	-2.37233	down	2.36193e-12	1.11959e-09	At3g26690	K07766 diphosphoinositol-polyphosphate diphosphatase [EC:3.6.1.52] | (RefSeq) nudix hydrolase 12, mitochondrial (A)
GLYMA_16G148900	1363	0.356667	3.45	4.66667	42	3.25217	up	1.17469e-05	0.000548439	At5g13900	--
GLYMA_16G152200	3249	1.02	2.30333	39.6667	85	1.13914	up	8.90271e-05	0.00289924	At3g04030	K14491 two-component response regulator ARR-B family | (RefSeq) two-component response regulator ARR12 isoform X1 (A)
GLYMA_16G153400	4981	12.35	5.98333	395.667	182.667	-1.08257	down	1.18625e-06	8.21207e-05	At5g18170	K00261 glutamate dehydrogenase (NAD(P)+) [EC:1.4.1.3] | (RefSeq) glutamate dehydrogenase 1 isoform X1 (A)
GLYMA_16G159000	1077	2.26667	1.04333	43.6667	19	-1.15526	down	0.00264527	0.0388637	--	--
GLYMA_16G164800	2860	18.08	6.28667	730.667	241.667	-1.56275	down	5.9843e-10	1.28452e-07	At5g50080	K09286 EREBP-like factor | (RefSeq) APETALA2/ethylene responsive factor-like protein (A)
GLYMA_16G168200	1291	0.76	2.20667	17.6667	48.6667	1.49893	up	0.000735904	0.0151026	At3g43630	K22736 vacuolar iron transporter family protein | (RefSeq) vacuolar iron transporter homolog 2-like (A)
GLYMA_16G173600	5190	3.11	7.12	192	415	1.15804	up	4.19211e-09	6.83201e-07	At5g24030	--
GLYMA_16G178100	1023	11.3567	32.95	140.667	384.667	1.50028	up	4.52646e-07	3.62153e-05	At1g01490	--
GLYMA_16G178200	1128	0.29	1.44333	4.33333	20.3333	2.28214	up	0.00103384	0.0193868	At1g01490	--
GLYMA_16G179100	2716	12.9933	52.28	267	1007	1.97075	up	0.000795365	0.015916	At4g25700	K15746 beta-carotene 3-hydroxylase [EC:1.14.15.24] | (RefSeq) BCH2; beta-carotene hydroxylase BCH2 (A)
GLYMA_16G180300	1229	7.45667	3.31667	164.333	69.6667	-1.20218	down	6.76258e-05	0.00231495	At5g23950	--
GLYMA_16G197800	3962	12.3733	5.73667	333.667	146	-1.14131	down	1.25845e-07	1.25583e-05	At3g61060	--
GLYMA_16G200700	7579	0.203333	2.79333	4	51.6667	3.74174	up	6.74742e-09	1.05152e-06	At2g45650	K09264 MADS-box transcription factor, plant | (RefSeq) uncharacterized protein LOC100779279 (A)
GLYMA_16G204700	2281	5.90333	13.6733	236	519	1.18121	up	2.85129e-06	0.000169828	At1g12380	--
GLYMA_16G207500	3677	5.49667	2.57667	106.333	47.3333	-1.12503	down	0.000409651	0.00959574	At4g33420	K00430 peroxidase [EC:1.11.1.7] | (RefSeq) peroxidase 47 (A)
GLYMA_16G216500	4066	0.5	3.09667	26.3333	156.667	2.6005	up	3.26048e-11	1.11277e-08	At1g73220	K08202 MFS transporter, OCT family, solute carrier family 22 (organic cation transporter), member 4/5 | (RefSeq) organic cation/carnitine transporter 4 (A)
GLYMA_16G219500	3268	2.46667	9.48	99	359	1.89788	up	0.00169155	0.0280111	At1g59960	K22374 3''-deamino-3''-oxonicotianamine reductase [EC:1.1.1.285] | (RefSeq) CHR2; chalcone reductase CHR2 (A)
GLYMA_16G221000	2264	6.94333	3.39667	107.667	50	-1.06689	down	4.00861e-05	0.00150838	At3g08650	--
GLYMA_17G007400	4673	2.63667	6.43667	69.6667	160	1.24495	up	0.000350519	0.00860019	At2g35760	--
GLYMA_17G029000	2824	0.813333	0.35	41.3333	16.6667	-1.26107	down	0.00367617	0.0496887	At3g06780	--
GLYMA_17G036300	1055	0.6	2.03333	11.3333	36	1.72759	up	0.000353911	0.00863994	At1g47960	--
GLYMA_17G043400	4297	2.02667	0.903333	111	47	-1.19275	down	0.000286817	0.00736553	At3g17630	--
GLYMA_17G046800	1047	16.36	8.37333	306.333	149	-1.00178	down	4.5548e-07	3.62356e-05	At5g20740	K01051 pectinesterase [EC:3.1.1.11] | (RefSeq) putative pectinesterase/pectinesterase inhibitor 22 (A)
GLYMA_17G047300	1193	6.1	25.3433	129.667	510	2.02008	up	2.68355e-18	4.36129e-15	At1g19210	K09286 EREBP-like factor | (RefSeq) ethylene-responsive transcription factor ERF023 (A)
GLYMA_17G064800	1573	2.77	1.23	53	22.3333	-1.20593	down	0.00200056	0.0317523	At2g35760	--
GLYMA_17G065100	1515	64.4167	133.607	1434.67	2798.67	1.02033	up	1.02296e-06	7.24331e-05	At4g25810	K14504 xyloglucan:xyloglucosyl transferase TCH4 [EC:2.4.1.207] | (RefSeq) probable xyloglucan endotransglucosylase/hydrolase protein 23 (A)
GLYMA_17G065300	1529	122.22	271.167	2811.67	5880	1.11289	up	2.12008e-09	3.71058e-07	At4g25810	K14504 xyloglucan:xyloglucosyl transferase TCH4 [EC:2.4.1.207] | (RefSeq) probable xyloglucan endotransglucosylase/hydrolase protein 23 (A)
GLYMA_17G065400	1477	2.49333	8.01667	55.3333	167.667	1.65115	up	8.10508e-08	8.57247e-06	At5g57560	K14504 xyloglucan:xyloglucosyl transferase TCH4 [EC:2.4.1.207] | (RefSeq) probable xyloglucan endotransglucosylase/hydrolase protein 23 (A)
GLYMA_17G067800	3586	36.4967	12.2	2183.67	692	-1.61643	down	3.04729e-19	8.00007e-16	At2g18700	K16055 trehalose 6-phosphate synthase/phosphatase [EC:2.4.1.15 3.1.3.12] | (RefSeq) probable alpha,alpha-trehalose-phosphate synthase [UDP-forming] 11 (A)
GLYMA_17G075300	4443	0.87	2.05	31.6667	70	1.19048	up	0.00304754	0.0434083	At2g24270	K00131 glyceraldehyde-3-phosphate dehydrogenase (NADP+) [EC:1.2.1.9] | (RefSeq) ALDH11A2; NADP-dependent glyceraldehyde-3-phosphate dehydrogenase (A)
GLYMA_17G076200	3477	0.6	1.31	37.3333	77	1.09212	up	0.000312392	0.0078452	At5g61260	--
GLYMA_17G078200	2832	1.67333	0.6	74	25.3333	-1.51745	down	3.76831e-05	0.00143377	At1g49980	K13447 respiratory burst oxidase [EC:1.6.3.- 1.11.1.-] | (RefSeq) respiratory burst oxidase homolog protein A isoform X1 (A)
GLYMA_17G082400	1063	0.92	2.51333	13.3333	34.6667	1.41187	up	0.00287976	0.0415574	--	--
GLYMA_17G092800	2111	20.0267	4.27	411.333	82.3333	-2.25465	down	5.18741e-05	0.00186067	At4g09600	--
GLYMA_17G093400	1675	2.87667	6.33	81	168.667	1.09825	up	1.73693e-05	0.000759023	At5g50120	--
GLYMA_17G093900	2442	20.6633	44.4533	387.667	787	1.07188	up	6.39728e-09	1.00614e-06	At3g48100	K14492 two-component response regulator ARR-A family | (RefSeq) two-component response regulator ARR5 isoform X2 (A)
GLYMA_17G100800	3163	1.83333	5.98	76.3333	235.333	1.66935	up	4.02101e-06	0.000223507	At1g74460	--
GLYMA_17G104300	1269	19.89	9.77	451.667	209.333	-1.06333	down	1.03425e-09	2.10107e-07	At4g02040	--
GLYMA_17G109800	3643	0.27	1.24333	11.3333	49.3333	2.17581	up	1.61847e-06	0.000106635	At5g20270	K07297 adiponectin receptor | (RefSeq) heptahelical transmembrane protein 1 (A)
GLYMA_17G110300	3894	47.9567	23.1733	1559.67	712.667	-1.08401	down	7.6025e-13	4.1185e-10	At5g33290	K18789 xylogalacturonan beta-1,3-xylosyltransferase [EC:2.4.2.41] | (RefSeq) probable glycosyltransferase At3g42180 isoform X1 (A)
GLYMA_17G113500	2348	0.583333	1.78	18	52.3333	1.58279	up	0.000282129	0.007278	At1g02630	K15014 solute carrier family 29 (equilibrative nucleoside transporter), member 1/2/3 | (RefSeq) equilibrative nucleotide transporter 8 (A)
GLYMA_17G132000	3627	3.96	9.45333	121	273.333	1.21957	up	2.44107e-08	3.12214e-06	At4g11780	--
GLYMA_17G147400	1902	2.09333	0.813333	43.3333	16	-1.39987	down	0.00345294	0.0474035	At4g17030	K20628 expansin | (RefSeq) EXPB9; expansin-B3-like precursor (A)
GLYMA_17G149400	4945	4.45333	1.84667	376.333	147.667	-1.31132	down	3.88065e-11	1.27071e-08	At1g77660	K15082 DNA repair protein RAD7 | (RefSeq) uncharacterized protein LOC100797833 (A)
GLYMA_17G152800	6948	0.416667	0.986667	27.3333	61	1.21876	up	0.00215203	0.0334305	At4g18020	K14491 two-component response regulator ARR-B family | (RefSeq) two-component response regulator ARR11 isoform X2 (A)
GLYMA_17G153000	6389	1.71333	3.67333	110.667	222.667	1.06389	up	3.26838e-06	0.000189383	At4g18010	K24221 type I inositol polyphosphate 5-phosphatase IP5P1/2 [EC:3.1.3.56] | (RefSeq) type I inositol polyphosphate 5-phosphatase 2 (A)
GLYMA_17G187700	2550	4.16667	1.24667	190.667	53.3333	-1.78054	down	2.18487e-09	3.80446e-07	--	K14794 ribosomal RNA-processing protein 12 | (RefSeq) RRP12-like protein (A)
GLYMA_17G214400	4286	3.54333	7.96	133.667	283.333	1.12478	up	0.000167377	0.00478827	At5g38260	K13416 brassinosteroid insensitive 1-associated receptor kinase 1 [EC:2.7.10.1 2.7.11.1] | (RefSeq) BRASSINOSTEROID INSENSITIVE 1-associated receptor kinase 1 isoform X1 (A)
GLYMA_17G222300	2299	1.66	3.84667	50.3333	111	1.17603	up	0.000563521	0.0123517	At1g80840	K13424 WRKY transcription factor 33 | (RefSeq) WRKY62; WRKY transcription factor 62 (A)
GLYMA_17G226400	14905	42.5167	20.3067	9873	4466.67	-1.10546	down	6.33083e-12	2.70081e-09	At4g22040	K10357 myosin V | (RefSeq) myosin-15 isoform X1 (A)
GLYMA_17G236200	1336	171.397	452.213	4094	10198.3	1.36525	up	7.14419e-19	1.62549e-15	At1g27730	--
GLYMA_17G242900	6049	0.42	1.82333	23.6667	99	2.08482	up	3.25435e-05	0.00127225	At5g42870	K15728 phosphatidate phosphatase LPIN [EC:3.1.3.4] | (RefSeq) phosphatidate phosphatase PAH2 (A)
GLYMA_17G247000	6226	5.62333	2.76	627.333	290.667	-1.05782	down	2.34458e-08	3.03099e-06	--	K12891 serine/arginine-rich splicing factor 2/8 | (RefSeq) uncharacterized protein LOC102669651 (A)
GLYMA_17G260400	2082	10.1233	4.05333	246	94	-1.3551	down	1.96117e-08	2.56447e-06	At1g20190	K20628 expansin | (RefSeq) expansin-A8 (A)
GLYMA_18G002100	1183	6.69333	2.98333	142	60.3333	-1.20583	down	0.000280751	0.00725341	--	--
GLYMA_18G004000	4155	0.44	1.01333	25.6667	55.6667	1.17236	up	0.00268555	0.0393201	At3g26560	K12818 ATP-dependent RNA helicase DHX8/PRP22 [EC:3.6.4.13] | (RefSeq) probable pre-mRNA-splicing factor ATP-dependent RNA helicase DEAH5 (A)
GLYMA_18G005000	1009	1.29333	5.48	23.3333	93.3333	2.04373	up	9.57503e-06	0.000466171	At3g48660	--
GLYMA_18G012200	2410	2.15333	0.856667	66.6667	25.3333	-1.36157	down	0.00074485	0.0152222	At5g63180	K01728 pectate lyase [EC:4.2.2.2] | (RefSeq) probable pectate lyase 5 (A)
GLYMA_18G013500	1651	1.47333	3.89	25	62	1.36005	up	0.000598518	0.0129366	At3g26380	--
GLYMA_18G018800	1858	3.85667	8.89333	100	218	1.16739	up	1.38276e-07	1.35673e-05	At1g78020	--
GLYMA_18G026900	1413	9.59	19.6333	242	467.667	1.00052	up	8.23327e-07	5.96589e-05	At3g55950	K13430 serine/threonine-protein kinase PBS1 [EC:2.7.11.1] | (RefSeq) probable serine/threonine-protein kinase PBL7 isoform X1 (A)
GLYMA_18G027100	4859	0.986667	2.31	46	101.333	1.18752	up	0.00191166	0.0306737	At3g08510	K05857 phosphatidylinositol phospholipase C, delta [EC:3.1.4.11] | (RefSeq) phosphoinositide phospholipase C 2 (A)
GLYMA_18G035900	5145	0.296667	1.12	23.3333	83.6667	1.88078	up	2.27314e-05	0.000951087	At3g11420	--
GLYMA_18G046300	4980	11.02	22.7933	489.667	954.667	1.01134	up	3.59999e-06	0.000204774	At1g70520	K13416 brassinosteroid insensitive 1-associated receptor kinase 1 [EC:2.7.10.1 2.7.11.1] | (RefSeq) BRASSINOSTEROID INSENSITIVE 1-associated receptor kinase 1 (A)
GLYMA_18G060200	2923	0.17	0.616667	8	27	1.81058	up	0.00202157	0.0319762	At2g30090	--
GLYMA_18G060900	1655	3.58333	1.80667	74.6667	35.6667	-1.02274	down	0.000613248	0.0130973	At2g30040	K20716 mitogen-activated protein kinase kinase kinase 17/18 | (RefSeq) mitogen-activated protein kinase kinase kinase 18 (A)
GLYMA_18G061000	2578	1.22	0.206667	33	5.33333	-2.58699	down	6.98337e-06	0.000355195	At2g30020	K17506 protein phosphatase 1L [EC:3.1.3.16] | (RefSeq) probable protein phosphatase 2C 2 (A)
GLYMA_18G071700	4064	0.356667	1.04667	14	38.3333	1.51331	up	0.00102917	0.0193416	At5g23810	K24917 amino acid permease | (RefSeq) probable amino acid permease 7 isoform X1 (A)
GLYMA_18G089800	4407	0.153333	0.75	4.66667	22	2.27719	up	0.000608201	0.0130572	At5g55250	K18848 indole-3-acetate O-methyltransferase [EC:2.1.1.278] | (RefSeq) indole-3-acetate O-methyltransferase 1 (A)
GLYMA_18G091600	1567	10.53	5.02	295.667	133.667	-1.10628	down	8.13818e-08	8.57247e-06	At1g50640	K09286 EREBP-like factor | (RefSeq) ethylene-responsive transcription factor 7 (A)
GLYMA_18G095300	3236	2.12	4.67333	32	66.3333	1.10625	up	0.0023393	0.0355309	At3g20480	K00912 tetraacyldisaccharide 4'-kinase [EC:2.7.1.130] | (RefSeq) probable tetraacyldisaccharide 4'-kinase, mitochondrial (A)
GLYMA_18G121900	1227	3.82667	8.53333	84	176.667	1.12167	up	3.01649e-07	2.58699e-05	At1g26920	--
GLYMA_18G122100	1491	57.7433	27.97	618.667	283.333	-1.08039	down	7.00481e-08	7.68705e-06	--	K15455 diphthamide biosynthesis protein 3 | (RefSeq) uncharacterized protein LOC100804191 (A)
GLYMA_18G136200	5290	23.75	11.19	2161.67	963	-1.11908	down	3.25476e-09	5.42558e-07	At1g23870	K16055 trehalose 6-phosphate synthase/phosphatase [EC:2.4.1.15 3.1.3.12] | (RefSeq) probable alpha,alpha-trehalose-phosphate synthase [UDP-forming] 10 (A)
GLYMA_18G137500	2278	3.91333	9.95667	119.667	287.333	1.30696	up	3.84078e-08	4.56732e-06	At1g10550	K08235 xyloglucan:xyloglucosyl transferase [EC:2.4.1.207] | (RefSeq) probable xyloglucan endotransglucosylase/hydrolase protein 33 (A)
GLYMA_18G150000	5952	2.11	1.06333	101	48	-1.01967	down	0.000301351	0.00762968	At4g37930	K00600 glycine hydroxymethyltransferase [EC:2.1.2.1] | (RefSeq) serine hydroxymethyltransferase 5 (A)
GLYMA_18G176500	255	24.11	9.60667	110	41.3333	-1.36603	down	2.25183e-06	0.000138974	--	--
GLYMA_18G184700	2430	6.83333	14.51	196	393	1.04706	up	6.95001e-07	5.2246e-05	At4g25300	K05277 anthocyanidin synthase [EC:1.14.20.4] | (RefSeq) ANS3; leucoanthocyanidin dioxygenase (A)
GLYMA_18G190200	1330	0.13	1.22333	2.66667	23.6667	3.20952	up	6.99041e-05	0.00237153	At3g09270	K00799 glutathione S-transferase [EC:2.5.1.18] | (RefSeq) GSTU58; tau class glutathione S-transferase (A)
GLYMA_18G195400	4682	24.3433	10.7633	796.667	332.333	-1.21168	down	6.33022e-16	6.96916e-13	At3g54110	K15103 solute carrier family 25 (mitochondrial uncoupling protein), member 8/9 | (RefSeq) mitochondrial uncoupling protein 1 (A)
GLYMA_18G200100	3462	1.03	2.74333	25	62.3333	1.37081	up	0.000296848	0.00754624	At5g01520	K10664 E3 ubiquitin-protein ligase ATL6/9/15/31/42/55 [EC:2.3.2.27] | (RefSeq) E3 ubiquitin-protein ligase ATL42 (A)
GLYMA_18G202400	2561	2.06	1.03	79	37.3333	-1.03537	down	0.000410687	0.00960023	At5g01380	--
GLYMA_18G209200	1597	0.413333	1.59333	8.33333	30.3333	1.91673	up	0.000302761	0.00765811	At3g51680	K09841 xanthoxin dehydrogenase [EC:1.1.1.288] | (RefSeq) xanthoxin dehydrogenase (A)
GLYMA_18G210900	1655	0.356667	1.72	5	23	2.24021	up	0.000762395	0.015442	At2g38540	--
GLYMA_18G213200	2009	6.51	24.1433	136	478.333	1.85284	up	2.75857e-14	2.29628e-11	At3g56400	K18835 WRKY transcription factor 2 | (RefSeq) WRKY59; probable WRKY transcription factor 2 (A)
GLYMA_18G219300	4185	4.72	9.93333	199.333	398	1.03508	up	0.000174818	0.00494312	At4g23160_2	K13430 serine/threonine-protein kinase PBS1 [EC:2.7.11.1] | (RefSeq) serine/threonine-protein kinase PBS1 isoform X2 (A)
GLYMA_18G225400	778	2.20667	0.56	30.6667	7.33333	-2.02052	down	0.000399431	0.00940798	At3g61190	--
GLYMA_18G242700	4427	44.7067	18.2167	2676.33	1037.67	-1.33149	down	2.74383e-10	6.57693e-08	At3g02750	K14497 protein phosphatase 2C [EC:3.1.3.16] | (RefSeq) protein phosphatase 2C 37 (A)
GLYMA_18G254300	2847	0.176667	0.646667	8.33333	28.6667	1.83685	up	0.00122559	0.0218688	At4g08850	K20718 LRR receptor-like serine/threonine-protein kinase ERECTA [EC:2.7.11.1] | (RefSeq) LRR receptor-like serine/threonine-protein kinase ERECTA precursor (A)
GLYMA_18G258100	3451	0.766667	2.19	22.6667	60.6667	1.48269	up	0.00022196	0.0060026	At3g49190	--
GLYMA_18G265900	2697	3.57333	8.77333	115.333	266.333	1.25845	up	4.72606e-08	5.48625e-06	At3g02100	K13691 pathogen-inducible salicylic acid glucosyltransferase [EC:2.4.1.-] | (RefSeq) UDP-glycosyltransferase 74G1 (A)
GLYMA_18G268000	7658	0.116667	0.47	5.33333	20.3333	1.96313	up	0.00252574	0.037495	At4g08850	K20718 LRR receptor-like serine/threonine-protein kinase ERECTA [EC:2.7.11.1] | (RefSeq) LRR receptor-like serine/threonine-protein kinase ERL1 (A)
GLYMA_18G277600	755	3.19333	6.65	43	84.6667	1.02497	up	0.000840464	0.0165041	At4g25760	--
GLYMA_18G284400	3203	0.27	0.956667	10	33.3333	1.78478	up	0.000879895	0.0171218	At5g14090	--
GLYMA_18G289900	1334	14.7967	6.87	212.333	93.3333	-1.14052	down	1.76518e-06	0.000113964	At2g38480	--
GLYMA_18G291700	2014	0.81	2.07	22.6667	54.6667	1.30886	up	0.00049901	0.0112601	At5g17450	K07213 copper chaperone | (RefSeq) copper chaperone homolog CCH (A)
GLYMA_18G292200	2329	0.303333	1.11	6.33333	22	1.83116	up	0.00214969	0.0334093	At5g38070	K10661 E3 ubiquitin-protein ligase MARCH6 [EC:2.3.2.27] | (RefSeq) probable E3 ubiquitin ligase SUD1 isoform X2 (A)
GLYMA_18G294200	998	47.3033	100.767	843.667	1700	1.0517	up	2.31485e-07	2.10116e-05	At1g66850	--
GLYMA_18G294700	955	1.79667	5.04	25	66.3333	1.45934	up	0.000791819	0.0159064	At5g38210	--
GLYMA_19G007600	1415	4.94333	0.92	125	22	-2.45919	down	1.98191e-10	5.16341e-08	At3g27880	--
GLYMA_19G008600	2341	34	74.82	822.333	1713	1.09846	up	1.16291e-10	3.28007e-08	At1g23740	K18980 2-methylene-furan-3-one reductase [EC:1.3.1.105] | (RefSeq) 2-methylene-furan-3-one reductase (A)
GLYMA_19G014700	2249	0.806667	1.94333	27	61.6667	1.22842	up	0.000804084	0.0159952	At4g31940	K23136 fraxetin 5-hydroxylase [EC:1.14.14.164] | (RefSeq) xanthotoxin 5-hydroxylase CYP82C4 (A)
GLYMA_19G018700	2239	5.50333	2.14333	220.333	81	-1.39725	down	1.55351e-10	4.27578e-08	At5g40010	K08900 mitochondrial chaperone BCS1 | (RefSeq) AAA-ATPase ASD, mitochondrial isoform X1 (A)
GLYMA_19G020600	3036	3.65333	8.63	104.333	233	1.20615	up	1.98338e-07	1.83444e-05	At5g15130	K13424 WRKY transcription factor 33 | (RefSeq) WRKY62; WRKY transcription factor 62 (A)
GLYMA_19G021100	3705	3.27333	7.48333	89.6667	193	1.15677	up	1.63214e-06	0.000107328	At3g01220	K09338 homeobox-leucine zipper protein | (RefSeq) homeobox-leucine zipper protein HAT7 (A)
GLYMA_19G043000	4138	80.1933	37.6867	3422.67	1514.67	-1.12533	down	9.73488e-12	3.95526e-09	At5g38710	K00318 proline dehydrogenase [EC:1.5.5.2] | (RefSeq) PDH; proline dehydrogenase (A)
GLYMA_19G065800	8323	44.5967	20.34	1817.67	785.667	-1.1689	down	2.07282e-11	7.5259e-09	At5g53050	--
GLYMA_19G069200	3583	1.69667	3.83333	82.3333	175	1.14053	up	0.00334642	0.0462801	At1g07430	K14497 protein phosphatase 2C [EC:3.1.3.16] | (RefSeq) probable protein phosphatase 2C 8 (A)
GLYMA_19G076500	1647	1.35333	3.79333	40	104.333	1.44847	up	0.00143992	0.0247578	At3g27250	--
GLYMA_19G085200	4579	2.42667	0.906667	64.3333	22.6667	-1.44982	down	0.00122375	0.0218561	At2g26690	K08245 phytepsin [EC:3.4.23.40] | (RefSeq) putative aspartic proteinase precursor (A)
GLYMA_19G086200	1110	5.30667	2.39333	84.3333	36	-1.18006	down	0.00323745	0.0452832	At3g05950	--
GLYMA_19G096100	3977	1.41	3.33333	80	177.333	1.20651	up	8.05815e-05	0.00268309	At5g41040	K15400 omega-hydroxypalmitate O-feruloyl transferase [EC:2.3.1.188] | (RefSeq) omega-hydroxypalmitate O-feruloyl transferase (A)
GLYMA_19G098500	2723	12.6667	33.31	318.333	796.667	1.36293	up	1.06269e-09	2.13343e-07	At3g02040	K18696 glycerophosphodiester phosphodiesterase [EC:3.1.4.46] | (RefSeq) glycerophosphodiester phosphodiesterase GDPD1, chloroplastic (A)
GLYMA_19G103300	687	2.66	6.14333	32.6667	71.6667	1.17314	up	0.000269881	0.00702576	--	--
GLYMA_19G105100	2906	0.61	1.68	16.6667	43.3333	1.42203	up	0.00267231	0.0391598	At5g13930	K00660 chalcone synthase [EC:2.3.1.74] | (RefSeq) CHS13; chalcone synthase 13 (A)
GLYMA_19G109400	2544	10.7367	5.04667	279.333	124.333	-1.1208	down	7.10252e-07	5.30273e-05	At1g08570	K03671 thioredoxin 1 | (RefSeq) uncharacterized protein LOC100776312 (A)
GLYMA_19G128200	3636	0.766667	2.18	25	67	1.46827	up	0.000548295	0.012104	At1g28110	K16297 serine carboxypeptidase-like clade II [EC:3.4.16.-] | (RefSeq) serine carboxypeptidase-like 45 (A)
GLYMA_19G131100	1007	7.26	15.9967	66.6667	138.333	1.1052	up	6.2431e-05	0.00217198	--	--
GLYMA_19G132900	5592	22.8667	10.2	1559.67	659	-1.19892	down	2.68397e-10	6.49653e-08	At5g04040	K14674 TAG lipase / steryl ester hydrolase / phospholipase A2 / LPA acyltransferase [EC:3.1.1.3 3.1.1.13 3.1.1.4 2.3.1.51] | (RefSeq) SDP1-3; triacylglycerol lipase SDP1 (A)
GLYMA_19G137800	2840	8.8	4.48	227.667	110.333	-1.01078	down	2.90365e-05	0.00116586	At2g41690	K09419 heat shock transcription factor, other eukaryote | (RefSeq) HSF-36; heat stress transcription factor 36 isoform 1 (A)
GLYMA_19G144600	2196	2.6	5.55	78.6667	161	1.05713	up	0.00162141	0.0271393	At2g42250	K23814 cytochrome P450 family 705 subfamily A [EC:1.14.-.-] | (RefSeq) cytochrome P450 705A12 (A)
GLYMA_19G158500	2099	0.23	2.08333	3.66667	31.3333	3.14477	up	5.42925e-06	0.000289976	At2g48140	--
GLYMA_19G164300	3238	0.603333	1.71333	35	94	1.46906	up	5.31066e-06	0.000284533	At2g38940	K08176 MFS transporter, PHS family, inorganic phosphate transporter | (RefSeq) PHT1-7; inorganic phosphate transporter 1-7 (A)
GLYMA_19G164600	2215	27.2333	11.0033	584.333	224.333	-1.34937	down	1.47154e-06	9.88629e-05	At2g31180	K09422 transcription factor MYB, plant | (RefSeq) myb-related protein Myb4-like (A)
GLYMA_19G169400	7958	8.25667	18.29	679.333	1426.33	1.10657	up	2.81774e-08	3.49697e-06	At1g15520	K05681 ATP-binding cassette, subfamily G (WHITE), member 2 | (RefSeq) ABC transporter G family member 21 (A)
GLYMA_19G174200	806	36.83	105.62	531	1431.33	1.48435	up	4.00012e-13	2.46181e-10	At2g37430	--
GLYMA_19G175400	3770	7.37667	18.4633	364.667	856.333	1.29301	up	1.70142e-09	3.10523e-07	At5g60070	--
GLYMA_19G176000	3263	0.333333	1.13	19.3333	61.6667	1.72005	up	0.00198538	0.0316187	At3g53510	K05681 ATP-binding cassette, subfamily G (WHITE), member 2 | (RefSeq) ABC transporter G family member 9 (A)
GLYMA_19G188100	3765	20.4567	9.03333	722	300.333	-1.21286	down	8.59083e-09	1.29733e-06	At2g36690	K24028 salicylic acid 3-hydroxylase [EC:1.14.11.-] | (RefSeq) protein DMR6-LIKE OXYGENASE 2 isoform X1 (A)
GLYMA_19G192900	8513	12.9533	27.7533	1103.67	2235	1.06429	up	3.1165e-09	5.23956e-07	At2g36380	K05681 ATP-binding cassette, subfamily G (WHITE), member 2 | (RefSeq) ABC transporter G family member 9 (A)
GLYMA_19G195800	2265	0.75	1.77667	22.6667	50.3333	1.20873	up	0.0033879	0.0467174	At5g22380	--
GLYMA_19G197800	576	5.14333	2.32	53	22.6667	-1.18343	down	0.00325248	0.0454562	At2g18500	--
GLYMA_19G213100	1055	6.94333	2.92667	122.333	49	-1.28992	down	0.000130575	0.00392979	At2g47520	K09286 EREBP-like factor | (RefSeq) uncharacterized protein LOC100527371 (A)
GLYMA_19G227800	3085	1.70333	15.4533	41.3333	349	3.14125	up	0.000969499	0.0184925	At1g56600	K18819 inositol 3-alpha-galactosyltransferase [EC:2.4.1.123] | (RefSeq) galactinol synthase 2 (A)
GLYMA_19G243100	1374	0.786667	1.97	19.3333	46	1.29108	up	0.000798933	0.0159548	At5g28150	--
GLYMA_19G254300	3715	0.736667	1.78	26.6667	60.6667	1.23574	up	0.00048099	0.010922	At4g01080	K23877 xyloglucan O-acetyltransferase | (RefSeq) protein ALTERED XYLOGLUCAN 4 (A)
GLYMA_19G254800	2808	4.15333	9.17667	131.333	273	1.11243	up	9.83939e-06	0.000477001	At4g23810	K13425 WRKY transcription factor 22 | (RefSeq) WRKY transcription factor 22 (A)
GLYMA_19G259300	3670	139.437	62.1733	5293	2234	-1.19874	down	2.51788e-10	6.18221e-08	At2g46760	K00103 L-gulonolactone oxidase [EC:1.1.3.8] | (RefSeq) probable L-gulonolactone oxidase 6 (A)
GLYMA_19G264200	2324	20.2467	9.87	537.333	249.333	-1.07428	down	5.35199e-05	0.00190865	At5g49620	K09422 transcription factor MYB, plant | (RefSeq) MYB-like transcription factor EOBI isoform X1 (A)
GLYMA_20G007900	6914	1.62667	5.8	84.6667	284.667	1.79837	up	1.4764e-10	4.09659e-08	At1g49430	K01897 long-chain acyl-CoA synthetase [EC:6.2.1.3] | (RefSeq) long chain acyl-CoA synthetase 2 (A)
GLYMA_20G009000	1968	1.66	3.57333	58.3333	118.333	1.0662	up	0.000396866	0.00937345	At3g03280	--
GLYMA_20G014300	5092	0.52	1.12	34.3333	69.6667	1.07416	up	0.00104688	0.0195775	At1g70940	K13947 auxin efflux carrier family protein | (RefSeq) PIN3B; auxin efflux carrier component 3b (A)
GLYMA_20G032500	8285	1.06667	3.45	51.6667	158.333	1.65788	up	1.22064e-10	3.4147e-08	At1g14040	K24195 xenotropic and polytropic retrovirus receptor 1 | (RefSeq) PHO1-H8; phosphate transporter PHO1 isoform X2 (A)
GLYMA_20G040400	2169	0.216667	0.836667	8.33333	30.6667	1.90495	up	0.00224591	0.0344189	At5g19410	K05681 ATP-binding cassette, subfamily G (WHITE), member 2 | (RefSeq) ABC transporter G family member 25 (A)
GLYMA_20G049000	465	6.73	2.98333	56	23.3333	-1.21085	down	0.00306343	0.0434907	--	--
GLYMA_20G080000	2740	1.48333	0.443333	50.3333	14.3333	-1.7649	down	2.28765e-05	0.000955632	At1g04610	K11816 indole-3-pyruvate monooxygenase [EC:1.14.13.168] | (RefSeq) probable indole-3-pyruvate monooxygenase YUCCA7 (A)
GLYMA_20G089100	2696	1.50333	0.51	62.3333	20.3333	-1.59469	down	0.000733895	0.0150721	At4g01630	K20628 expansin | (RefSeq) expansin-A1 isoform X1 (A)
GLYMA_20G094500	2139	5.76667	12.1433	169	335.333	1.04164	up	0.00145061	0.0248909	At1g56600	K18819 inositol 3-alpha-galactosyltransferase [EC:2.4.1.123] | (RefSeq) galactinol synthase 2 (A)
GLYMA_20G097800	3260	5.22667	1.77333	84.3333	27	-1.60407	down	0.000572383	0.0124903	At2g24100	--
GLYMA_20G105300	14292	19.22	6.4	898.333	282.333	-1.62006	down	4.35774e-16	4.95751e-13	At4g35780	K14510 serine/threonine-protein kinase CTR1 [EC:2.7.11.1] | (RefSeq) serine/threonine-protein kinase CTR1 (A)
GLYMA_20G114400	2355	0.94	2.17667	17.3333	38	1.17783	up	0.00346496	0.0475304	--	--
GLYMA_20G118100	3063	7.41667	20.8167	258	685	1.45632	up	1.04445e-08	1.51686e-06	At1g68390	--
GLYMA_20G139200	3773	0.04	0.856667	1.66667	33	4.38385	up	8.71317e-07	6.27366e-05	At4g38830	K13416 brassinosteroid insensitive 1-associated receptor kinase 1 [EC:2.7.10.1 2.7.11.1] | (RefSeq) BRASSINOSTEROID INSENSITIVE 1-associated receptor kinase 1 (A)
GLYMA_20G140100	3683	1.73667	3.63333	78	153	1.02767	up	0.000794084	0.0159064	At4g05200	K13416 brassinosteroid insensitive 1-associated receptor kinase 1 [EC:2.7.10.1 2.7.11.1] | (RefSeq) BRASSINOSTEROID INSENSITIVE 1-associated receptor kinase 1 isoform X1 (A)
GLYMA_20G155500	2172	0.98	0.41	38	15.3333	-1.27546	down	0.00350081	0.0479451	At4g23030	K03327 multidrug resistance protein, MATE family | (RefSeq) protein DETOXIFICATION 49 (A)
GLYMA_20G158500	3040	0.0866667	2.40667	3	77.6667	4.73891	up	0.000269876	0.00702576	At5g52300	--
GLYMA_20G174800	7798	1.04667	3.75	48	162.333	1.80193	up	1.60596e-07	1.5483e-05	At1g71960	K05681 ATP-binding cassette, subfamily G (WHITE), member 2 | (RefSeq) ABC transporter G family member 25 (A)
GLYMA_20G177600	1675	1.76667	4.01667	28	60.3333	1.1529	up	0.00103225	0.0193797	At1g07900	K13944 LOB domain-containing protein 16 | (RefSeq) LBD14; LBD domain-containing transcription factor (A)
GLYMA_20G184900	5063	1.44333	3.78333	79	194.667	1.35165	up	7.48033e-06	0.000378217	At3g25620	K05681 ATP-binding cassette, subfamily G (WHITE), member 2 | (RefSeq) ABC transporter G family member 21 (A)
GLYMA_20G196800	1272	0.276667	1.62667	4.33333	24	2.52428	up	0.000163498	0.004697	At2g32300	--
GLYMA_20G209700	2788	7.03	15.1133	197	400.667	1.07105	up	2.66667e-09	4.5279e-07	At3g23250	K09422 transcription factor MYB, plant | (RefSeq) MYB29B2; MYB/HD-like transcription factor (A)
GLYMA_20G210800	1691	8.01	4.04333	242.333	115.333	-1.03088	down	0.000855616	0.0167343	At4g14580	K12761 carbon catabolite-derepressing protein kinase [EC:2.7.11.1] | (RefSeq) CBL-interacting serine/threonine-protein kinase 4 (A)
GLYMA_20G210900	2985	2.51667	6.39333	102.333	244	1.30897	up	5.18824e-05	0.00186067	At2g26640	K15397 3-ketoacyl-CoA synthase [EC:2.3.1.199] | (RefSeq) 3-ketoacyl-CoA synthase 11 (A)
GLYMA_20G217600	4341	0.0966667	0.52	4	21	2.42226	up	0.00258253	0.038214	At4g24140	K13699 abhydrolase domain-containing protein 5 [EC:2.3.1.51] | (RefSeq) probable 1-acylglycerol-3-phosphate O-acyltransferase (A)
GLYMA_20G231900	1405	0.12	0.72	3	17	2.55538	up	0.00109001	0.0201522	At3g05200	K10664 E3 ubiquitin-protein ligase ATL6/9/15/31/42/55 [EC:2.3.2.27] | (RefSeq) E3 ubiquitin-protein ligase ATL6 (A)
GLYMA_20G232900	4264	0.553333	1.43667	19.3333	47.3333	1.33083	up	0.000629367	0.0133913	At5g09420_1	K01426 amidase [EC:3.5.1.4] | (RefSeq) amidase 1 (A)
GLYMA_20G238100	4157	2.43	1.20333	142	67	-1.04304	down	0.00060919	0.0130572	At3g05640	K17506 protein phosphatase 1L [EC:3.1.3.16] | (RefSeq) uncharacterized protein LOC100807396 (A)
GLYMA_20G242000	2909	1.36333	3.04667	70.6667	148	1.12638	up	0.00320275	0.0449268	At2g39350	K05681 ATP-binding cassette, subfamily G (WHITE), member 2 | (RefSeq) ABC transporter G family member 25 (A)
GLYMA_U028300	4900	0.616667	1.36	53	110.667	1.11179	up	6.05497e-05	0.00212376	At5g01030	--
GLYMA_U038700	803	22.4033	10.5167	322.333	143.667	-1.1286	down	2.31453e-07	2.10116e-05	--	--
GLYMA_U043300	4408	0	1.23667	0	21	6.9222	up	0.0030075	0.0429648	At1g49670_1	K09841 xanthoxin dehydrogenase [EC:1.1.1.288] | (RefSeq) xanthoxin dehydrogenase (A)
novel.1264	2891	1.36	0.633333	58.6667	26	-1.13686	down	0.00108789	0.0201318	At3g29775	K21989 calcium permeable stress-gated cation channel | (RefSeq) CSC1-like protein At1g69450 (A)
novel.1337	614	6.64667	17.3967	73	181	1.34385	up	2.1669e-05	0.000915273	--	--
novel.1348	568	0.756667	3.79667	7.66667	36.6667	2.28984	up	7.95617e-06	0.000398732	--	--
novel.1425	1866	5.27	2.13667	176	67.6667	-1.3379	down	0.000177827	0.0050116	At3g11840	--
novel.1445	9620	0.766667	1.66333	89.6667	185.667	1.08163	up	0.00218918	0.0337922	At4g27190	K13459 disease resistance protein RPS2 | (RefSeq) probable disease resistance protein At4g27220 (A)
novel.1449	375	0.746667	3.52667	5	22.3333	2.20236	up	0.00153811	0.0260139	At3g25400	K16904 dCTP diphosphatase [EC:3.6.1.12] | (RefSeq) dCTP pyrophosphatase 1 (A)
novel.175	8299	0	1.87667	0	59	8.41017	up	7.91785e-07	5.7618e-05	At2g07420	K24544 cytochrome P450 family 714 subfamily C | (RefSeq) cytochrome P450 714C2 (A)
novel.205	3834	0.78	2.16	28.6667	74.6667	1.44239	up	0.000114429	0.00353745	--	--
novel.208	4068	5.3	12.11	115	248.667	1.14735	up	0.00076152	0.0154334	--	K17469 sulfate transporter 2, low-affinity | (RefSeq) low affinity sulfate transporter 3 (A)
novel.360	2302	7.32	2.03667	301	79.3333	-1.8811	down	2.79419e-17	3.97346e-14	At5g12010	--
novel.378	3275	4.17	1.65333	148	55.3333	-1.3639	down	0.000214138	0.00582704	At4g32720	K11090 lupus La protein | (RefSeq) la protein 1 isoform X1 (A)
novel.384	13301	2.87333	1.25333	73	30.3333	-1.22967	down	0.000158292	0.00458386	At1g35647	K01358 ATP-dependent Clp protease, protease subunit [EC:3.4.21.92] | (RefSeq) ATP-dependent Clp protease proteolytic subunit-like (A)
novel.418	1539	3.13	1.03	86.3333	27	-1.63914	down	9.63232e-07	6.86308e-05	--	--
novel.448	875	1.45	0.156667	22.6667	2.33333	-3.24121	down	6.01116e-05	0.00211065	--	--
novel.543	2066	0.72	1.83667	16.3333	39.3333	1.31923	up	0.00334167	0.0462669	At5g32440	--
novel.597	1223	1.8	0.373333	32.3333	6.33333	-2.30908	down	0.000111137	0.00346391	At4g39250	--
novel.607	7254	0.863333	2.23667	20	49	1.33715	up	0.00249447	0.0371438	At2g06890	K14721 DNA-directed RNA polymerase III subunit RPC5 | (RefSeq) DNA-directed RNA polymerase III subunit RPC5 (A)
novel.669	1046	9.83	4.14	183.333	73	-1.28784	down	1.57193e-06	0.000104043	--	--
novel.8	3046	2.53	5.18	118	229.333	1.00161	up	8.5889e-06	0.000424827	At2g16920	K10581 ubiquitin-conjugating enzyme E2 O [EC:2.3.2.24] | (RefSeq) probable ubiquitin-conjugating enzyme E2 24 isoform X2 (A)
novel.88	771	0.266667	1.29667	3.66667	17	2.25474	up	0.00200206	0.0317523	--	--
novel.911	891	11.74	25.0667	186.667	380	1.0595	up	2.71714e-05	0.00110176	--	--
novel.979	1910	15.52	6.84667	530	221.667	-1.21753	down	3.45497e-13	2.2248e-10	At5g12010	--
