# Supplementary material for: Gma-miR408 Enhances Soybean Cyst Nematode Susceptibility by Suppressing Reactive Oxygen Species Accumulation
Source: Int J Mol Sci. 2022 Nov 14;23(22):14022. doi: 10.3390/ijms232214022 (PMC9695887; doi:10.3390/ijms232214022)
Supplement: Supplementary file 1 [file ijms-23-14022-s001.zip › Table.S7.xlsx]

## Sheet: Sheet1
Table S7 Significant differentially expressed genes (DEGs) in the comparison of OE vs STTM.													ID		M EV	M OE	C EV
GeneID	length	FPKM-M EV	FPKM-M OE	Count-M EV	Count-M OE	log2Ratio	Regulation	P-value	padj	KOG	Annotation
GLYMA_01G004100	5143	5.58667	18.2467	426.333	1192.67	1.60728	up	2.71873e-14	1.25635e-12	At2g19710	--
GLYMA_01G005000	2041	28.6067	8.28667	1178	288	-1.89698	down	2.93896e-12	1.07595e-10	At2g19810	K23048 RING finger protein unkempt | (RefSeq) zinc finger CCCH domain-containing protein (A)
GLYMA_01G006000	1334	76.9267	28.2533	1727.67	523.667	-1.56669	down	2.00955e-06	3.19777e-05	At5g56550	--
GLYMA_01G006200	2717	15.5167	8.48667	881.667	391.333	-1.00169	down	0.000740494	0.0060243	--	K17479 glutaredoxin domain-containing cysteine-rich protein 1 | (RefSeq) uncharacterized protein At3g28850 (A)
GLYMA_01G007100	1032	0.456667	1.95667	9.33333	34.3333	2.00202	up	0.000111136	0.00115965	At4g29140	K03327 multidrug resistance protein, MATE family | (RefSeq) protein DETOXIFICATION 51 (A)
GLYMA_01G008200	10413	7.5	2.22	609	157.333	-1.85531	down	2.26263e-06	3.56416e-05	At3g28345	K05658 ATP-binding cassette, subfamily B (MDR/TAP), member 1 [EC:7.6.2.2] | (RefSeq) putative ABC transporter B family member 8 (A)
GLYMA_01G009000	816	1.67667	6.95	28.3333	96	1.91183	up	8.42557e-07	1.43093e-05	At4g29110	--
GLYMA_01G009500	2230	0.94	0.27	19.6667	4.66667	-1.93103	down	0.00976502	0.0498485	At1g32100	K21568 pinoresinol/lariciresinol reductase [EC:1.23.1.1 1.23.1.2 1.23.1.3 1.23.1.4] | (RefSeq) isoflavone reductase homolog (A)
GLYMA_01G011400	3420	6.04	3.18333	183.667	80	-1.05023	down	0.00025088	0.00238319	7304024	K12189 ESCRT-II complex subunit VPS25 | (RefSeq) vacuolar protein sorting-associated protein 25 isoform X1 (A)
GLYMA_01G011500	3842	3.2	0.263333	119.333	8.66667	-3.68132	down	1.15986e-13	5.01634e-12	At4g16070	K13806 sn1-specific diacylglycerol lipase [EC:3.1.1.116] | (RefSeq) uncharacterized protein LOC100810158 (A)
GLYMA_01G011700	1961	0.306667	0.906667	12	30.3333	1.4627	up	0.00660596	0.0367366	At1g31920	K23541 Ca2+/H+ antiporter, TMEM165/GDT1 family | (RefSeq) putative pentatricopeptide repeat-containing protein At3g23330 (A)
GLYMA_01G012200	3260	13.9833	45.7433	522	1398.67	1.59173	up	3.2553e-05	0.000394589	At4g16070	K13806 sn1-specific diacylglycerol lipase [EC:3.1.1.116] | (RefSeq) uncharacterized protein LOC100810158 (A)
GLYMA_01G013900	3431	32.3833	15.5533	984.667	398.667	-1.17193	down	9.29156e-11	2.88231e-09	At1g32170	K08235 xyloglucan:xyloglucosyl transferase [EC:2.4.1.207] | (RefSeq) probable xyloglucan endotransglucosylase/hydrolase protein 30 (A)
GLYMA_01G014000	4998	15.7	35.9833	1353.33	2610.67	1.08969	up	5.93344e-07	1.03639e-05	At3g03050	K20924 cellulose synthase-like protein [EC:2.4.1.-] | (RefSeq) cellulose synthase-like protein D2 (A)
GLYMA_01G016600	2503	3.57667	26.5767	95.6667	601.667	2.78626	up	4.66432e-19	3.35089e-17	At3g02940	K09422 transcription factor MYB, plant | (RefSeq) transcription factor MYB39 (A)
GLYMA_01G017000	1480	93.3667	17.5167	2417.67	380.667	-2.52929	down	1.55763e-43	6.21964e-41	At4g17940	--
GLYMA_01G018400	1973	56.99	125.313	2203.67	4082.67	1.02955	up	3.47489e-07	6.39007e-06	At1g32640	K13422 transcription factor MYC2 | (RefSeq) transcription factor MYC1 (A)
GLYMA_01G019500	998	45.7067	5.99667	740.333	81.3333	-3.05173	down	4.01874e-29	5.8476e-27	At5g65660	--
GLYMA_01G019600	2711	3.02667	1.45333	119	49.3333	-1.1595	down	0.000163435	0.00163674	At3g53440	--
GLYMA_01G022600	5508	0.663333	2.02667	38	96.3333	1.48751	up	1.71364e-06	2.76404e-05	At5g65500	K13420 LRR receptor-like serine/threonine-protein kinase FLS2 [EC:2.7.11.1] | (RefSeq) LRR receptor-like serine/threonine-protein kinase FLS2 (A)
GLYMA_01G024000	1432	271.527	592.013	7817.67	14294.3	1.01344	up	1.33521e-08	3.11912e-07	At2g22500	K15104 solute carrier family 25 (mitochondrial oxoglutarate transporter), member 11 | (RefSeq) mitochondrial uncoupling protein 5 (A)
GLYMA_01G024500	1744	1.82	5.91333	65.3333	173.667	1.57197	up	1.19274e-06	1.97963e-05	--	--
GLYMA_01G025300	2783	0.936667	2.70667	34.6667	85	1.42318	up	4.19831e-05	0.000495259	At1g67900	--
GLYMA_01G028600	4830	2.05667	0.86	84.6667	31	-1.35076	down	0.000208526	0.00202797	At1g60790_1	K23877 xyloglucan O-acetyltransferase | (RefSeq) protein ALTERED XYLOGLUCAN 4 (A)
GLYMA_01G028800	1315	11.7533	4.37	323.333	97.6667	-1.55813	down	3.3493e-06	5.08466e-05	At1g23390	--
GLYMA_01G030300	1469	10.7567	29.48	327.667	732.333	1.3293	up	3.91975e-07	7.1446e-06	At1g70420	--
GLYMA_01G034600	2350	1.36	4.44667	47	126.333	1.5749	up	1.04864e-06	1.75489e-05	At1g70230	K23877 xyloglucan O-acetyltransferase | (RefSeq) protein ALTERED XYLOGLUCAN 4 (A)
GLYMA_01G035300	1831	1.77333	0.5	38.3333	9.33333	-1.91787	down	0.000279956	0.00261953	At1g60010	--
GLYMA_01G036000	2253	91.1	2.00333	3058.33	56.6667	-5.6164	down	8.14512e-123	9.32344e-119	At1g24100	K11820 N-hydroxythioamide S-beta-glucosyltransferase [EC:2.4.1.195] | (RefSeq) UDP-glycosyltransferase 74B1 (A)
GLYMA_01G036100	875	0.113333	1.40333	2	19.3333	3.43863	up	7.76012e-05	0.000850838	At3g14470	K13457 disease resistance protein RPM1 | (RefSeq) disease resistance protein RPM1 (A)
GLYMA_01G036600	1200	49.8133	23.5767	1198.33	483.667	-1.18912	down	0.000347925	0.00315911	At1g10480	--
GLYMA_01G036800	1867	40.1067	13.8767	1505	436.667	-1.64281	down	1.37327e-17	8.65289e-16	At5g50120	--
GLYMA_01G036900	1812	255.717	61.0267	9228.67	1863.67	-2.17382	down	6.07868e-31	1.04895e-28	At1g59970	K07999 matrix metalloproteinase-20 (enamelysin) [EC:3.4.24.-] | (RefSeq) metalloendoproteinase 4-MMP (A)
GLYMA_01G037900	2201	17.46	52.9933	759.333	1962.67	1.49976	up	6.54605e-12	2.28447e-10	At1g70090	K20893 probable galacturonosyltransferase-like 1 [EC:2.4.1.-] | (RefSeq) probable galacturonosyltransferase-like 1 (A)
GLYMA_01G038600	2708	10.8867	3.88667	444.333	137.333	-1.58983	down	1.34922e-10	4.07854e-09	At1g70000	--
GLYMA_01G040400	9012	34.8533	84.8233	1478.33	3013	1.17483	up	2.2576e-07	4.32624e-06	At1g27100	--
GLYMA_01G043100	1041	0.296667	1.13333	6	19	1.80583	up	0.00559499	0.0320272	At3g50310	K20716 mitogen-activated protein kinase kinase kinase 17/18 | (RefSeq) mitogen-activated protein kinase kinase kinase 18 (A)
GLYMA_01G047400	3743	16.4567	7.04333	443.333	162.667	-1.32103	down	5.73899e-07	1.00755e-05	At5g22260	--
GLYMA_01G050100	2391	6.29	1.6	209.333	47.6667	-2.07061	down	6.10423e-07	1.06225e-05	At1g26770	K20628 expansin | (RefSeq) expansin-A15 (A)
GLYMA_01G053700	5795	0.74	1.64667	37.6667	69.6667	1.03237	up	0.00510375	0.029756	At2g25350_2	K03681 exosome complex component RRP40 | (RefSeq) putative exosome complex component rrp40 (A)
GLYMA_01G055400	1497	2.53333	6.29667	68	141.333	1.19034	up	0.000115346	0.00119812	At2g03420	--
GLYMA_01G056900	2576	0.69	0.296667	34.3333	12.3333	-1.32682	down	0.00865344	0.0451953	At1g26610	--
GLYMA_01G063700	5917	6.06	3.07667	350	152	-1.08205	down	0.00012117	0.00125368	At1g69170	--
GLYMA_01G064900	5426	5.79667	2.90667	512.333	221	-1.09548	down	1.50686e-05	0.00019608	At2g03810	--
GLYMA_01G067000	2997	30.27	12.3933	1848	628.333	-1.40236	down	1.03068e-10	3.17748e-09	At1g26270	--
GLYMA_01G067800	1700	0.273333	1.02	7	22	1.77992	up	0.00380201	0.0235627	At5g10280	K09422 transcription factor MYB, plant | (RefSeq) transcription factor MYB53 (A)
GLYMA_01G069000	679	2.72333	7.78333	37.3333	89.3333	1.39992	up	1.66244e-05	0.000214054	--	--
GLYMA_01G077000	2246	0.4	1.73667	9.33333	32.3333	1.95252	up	0.00732068	0.0397207	At1g65680	K20628 expansin | (RefSeq) EXPB8; expansin-B3-like precursor (A)
GLYMA_01G081100	2677	6.49333	3.35667	358	152	-1.07676	down	2.23271e-05	0.000280231	At1g68550	K13434 pathogenesis-related genes transcriptional activator PTI6 | (RefSeq) pathogenesis-related genes transcriptional activator PTI6 (A)
GLYMA_01G081300	5213	5.58	12.6833	317.667	644.667	1.09861	up	0.000251615	0.00238884	At1g68560	K15925 alpha-D-xyloside xylohydrolase [EC:3.2.1.177] | (RefSeq) alpha-xylosidase 1 (A)
GLYMA_01G083900	1139	0.146667	1.27	3	23.3333	3.07172	up	8.86908e-05	0.000953551	--	--
GLYMA_01G085800	2663	0.86	1.95667	27.3333	54.3333	1.09266	up	0.00694009	0.0381989	At3g02100	K13692 UDP-glucose:(indol-3-yl)acetate beta-D-glucosyltransferase [EC:2.4.1.121] | (RefSeq) UDP-glycosyltransferase 84B2 (A)
GLYMA_01G087500	1824	269.707	90.17	10012.7	2782.33	-1.69793	down	7.50783e-22	6.74919e-20	At1g25560	K09287 RAV-like factor | (RefSeq) RAV1; AP2/ERF transcription factor family protein RAV1 (A)
GLYMA_01G088300	4111	0.603333	1.52	24.6667	53.6667	1.24267	up	0.00216042	0.0149877	At1g68810	--
GLYMA_01G089600	1349	2.94667	1.26667	83.3333	29	-1.35072	down	0.00113778	0.00874274	--	--
GLYMA_01G090200	2831	0.06	0.416667	2.66667	15.6667	2.69571	up	0.00158803	0.0115683	At3g25670	--
GLYMA_01G096600	2894	2.52333	13.5733	146.667	665.667	2.3181	up	1.27089e-21	1.13063e-19	At1g32640	K13422 transcription factor MYC2 | (RefSeq) transcription factor MYC2 (A)
GLYMA_01G096800	1877	8.4	3.54667	315	113	-1.35237	down	5.29783e-07	9.3584e-06	At2g35230	--
GLYMA_01G098300	2170	1.15	0.283333	26.6667	5.66667	-2.10466	down	0.0019129	0.0135134	--	--
GLYMA_01G102300	1509	14.29	7.29667	448.667	185.333	-1.10179	down	0.000992477	0.00778475	--	--
GLYMA_01G104800	2380	8.32667	3.85	397.667	155.333	-1.22392	down	2.56533e-09	6.57903e-08	At3g53950	--
GLYMA_01G109500	1018	7.68333	4.05	161.667	69.6667	-1.05213	down	0.000629423	0.00525641	At2g37970	--
GLYMA_01G109800	5884	10.1133	25.32	578.667	1227.33	1.22039	up	6.33437e-07	1.0986e-05	At2g37980	K23280 rhamnogalacturonan I rhamnosyltransferase [EC:2.4.1.351] | (RefSeq) rhamnogalacturonan I rhamnosyltransferase 1 (A)
GLYMA_01G112700	2881	1.92333	4.57	87.6667	174.333	1.13135	up	2.73222e-05	0.000336047	At2g38090	--
GLYMA_01G118000	3538	3.09667	0.0266667	133	1	-6.99061	down	1.94415e-13	8.19169e-12	At5g01320	K01568 pyruvate decarboxylase [EC:4.1.1.1] | (RefSeq) pyruvate decarboxylase 2 (A)
GLYMA_01G124500	3497	3.77333	1.94667	91	39	-1.0726	down	0.00376792	0.0233683	At5g01600	K00522 ferritin heavy chain [EC:1.16.3.2] | (RefSeq) SFERH-2; ferritin-2, chloroplastic (A)
GLYMA_01G124600	1848	16.7867	8.04	231.333	91	-1.1853	down	9.77117e-05	0.00103754	At3g08890	--
GLYMA_01G124700	1847	71.8733	36.9833	2690.67	1153.67	-1.07635	down	4.20625e-08	9.13615e-07	At2g38310	K14496 abscisic acid receptor PYR/PYL family | (RefSeq) abscisic acid receptor PYL4 (A)
GLYMA_01G128100	3683	4.85333	102.727	217	3856.67	4.2932	up	1.06362e-40	3.51199e-38	At2g38470	K13424 WRKY transcription factor 33 | (RefSeq) WRKY5; probable WRKY transcription factor 33 isoform X1 (A)
GLYMA_01G131100	3825	107.787	4.43667	3641.67	128.667	-4.70757	down	4.08257e-115	3.50488e-111	At2g30970	K14455 aspartate aminotransferase, mitochondrial [EC:2.6.1.1] | (RefSeq) aspartate aminotransferase, mitochondrial (A)
GLYMA_01G131500	3901	39.92	18.4167	3129.67	1212.33	-1.2281	down	1.63841e-12	6.19638e-11	At5g58380	K07198 5'-AMP-activated protein kinase, catalytic alpha subunit [EC:2.7.11.11] | (RefSeq) CBL-interacting protein kinase 2 (A)
GLYMA_01G131900	1970	0.77	1.80667	30.3333	60.3333	1.12454	up	0.00182416	0.0130178	At2g30400	--
GLYMA_01G132800	2758	1.98333	0.936667	81.6667	31	-1.21515	down	0.00382468	0.0236861	At3g42630	--
GLYMA_01G134200	1737	0.533333	2.98333	18.6667	87.3333	2.3677	up	5.3612e-10	1.50658e-08	At3g60580	--
GLYMA_01G144400	2431	9.45667	4.75667	459.667	195.333	-1.10496	down	2.22298e-07	4.26942e-06	At2g45430	--
GLYMA_01G144500	16770	2.86667	1.13667	196.667	65.3333	-1.45112	down	3.08184e-09	7.8219e-08	At1g01950	K11498 centromeric protein E | (RefSeq) kinesin-like protein KIN-7N (A)
GLYMA_01G145700	1657	9.20333	2.74	57.6667	15.3333	-1.82593	down	0.00423045	0.0256939	At1g47490	--
GLYMA_01G148700	1797	1.32667	3.13	47.6667	95.6667	1.12764	up	0.000483016	0.00419812	At2g19640	K11426 [histone H3]-lysine4/36 N-trimethyltransferase SMYD [EC:2.1.1.354 2.1.1.357] | (RefSeq) histone-lysine N-methyltransferase ASHR1 (A)
GLYMA_01G150300	2266	1.87667	0.663333	76	22.3333	-1.61855	down	3.27119e-05	0.000396096	At1g31350	--
GLYMA_01G150500	2453	18.4733	5.01333	563.667	125	-2.00923	down	4.22584e-13	1.71531e-11	At5g01380	--
GLYMA_01G153000	1976	11.5533	6.22667	287	131.667	-1.00224	down	1.19295e-05	0.000159215	At1g31720	--
GLYMA_01G153100	7056	2.65333	1.29	140	58	-1.14775	down	3.03953e-05	0.000370922	At5g45330	K18749 protein LSM14 | (RefSeq) decapping 5-like protein (A)
GLYMA_01G154000	2135	7.34667	3.50667	251	99	-1.19551	down	0.000638091	0.00531383	--	--
GLYMA_01G155400	2356	6.84333	2.91	186	66	-1.35765	down	1.6029e-05	0.000207164	At1g14130	K23947 2-oxoglutarate-dependent dioxygenase [EC:1.14.11.-] | (RefSeq) 2-oxoglutarate-dependent dioxygenase DAO (A)
GLYMA_01G161100	4985	81.32	196.473	4294	8631.33	1.15776	up	3.57993e-06	5.38715e-05	At1g47670	K24917 amino acid permease | (RefSeq) amino acid permease 8 (A)
GLYMA_01G161200	2077	42.42	15.86	1021.33	321.667	-1.53527	down	1.20179e-12	4.63702e-11	At4g35750	K24997 ganglioside-induced differentiation-associated protein 2 | (RefSeq) protein GDAP2 homolog isoform X2 (A)
GLYMA_01G165300	1882	37.12	13.74	877.667	270.333	-1.55015	down	1.43909e-12	5.49702e-11	At2g17850	K22547 arsenate reductase [EC:1.20.4.1] | (RefSeq) protein HIGH ARSENIC CONTENT 1-like (A)
GLYMA_01G165600	2201	12.7733	6.65333	424.333	185.667	-1.05066	down	0.00132871	0.00996892	At4g36010	K12173 BRCA1-A complex subunit BRE | (RefSeq) BRISC and BRCA1-A complex member 2 (A)
GLYMA_01G166000	1365	71.5333	20.7367	2012.33	479.667	-1.90752	down	8.08274e-16	4.34368e-14	At4g36040	K03686 molecular chaperone DnaJ | (RefSeq) chaperone protein DnaJ (A)
GLYMA_01G166100	5556	24.0633	71.12	1144.67	2809	1.4474	up	3.10047e-13	1.28899e-11	At5g66210	K13412 calcium-dependent protein kinase [EC:2.7.11.1] | (RefSeq) calcium-dependent protein kinase 28 (A)
GLYMA_01G172100	342	1.09667	4.96667	8	28.6667	2.03345	up	0.00434856	0.0262258	At4g36500	--
GLYMA_01G175800	1362	6.81667	15.7467	196.333	361.667	1.06977	up	0.00163784	0.0118757	--	--
GLYMA_01G176900	2664	1.78333	3.83667	77	144	1.01299	up	0.000610383	0.00512233	At4g38150	--
GLYMA_01G177900	1479	4.49667	18.9333	137	473.333	1.94733	up	5.79943e-16	3.14617e-14	At5g66690	K12356 coniferyl-alcohol glucosyltransferase [EC:2.4.1.111] | (RefSeq) UDP-glycosyltransferase 72E1 (A)
GLYMA_01G179000	2724	1.79	7.04667	100.333	323.667	1.85523	up	4.10854e-09	1.02758e-07	At2g23770	K13429 chitin elicitor receptor kinase 1 | (RefSeq) chitin elicitor receptor kinase 1 (A)
GLYMA_01G179900	7459	4.55	13.5633	300	766.667	1.47599	up	2.48815e-06	3.88024e-05	At4g36870	--
GLYMA_01G180500	932	9.36333	4.7	184.333	74	-1.13512	down	0.00339622	0.0215138	At2g23690	--
GLYMA_01G180800	1839	1.04333	2.32333	27.3333	52.6667	1.06411	up	0.00890736	0.0462332	At3g50820	K02716 photosystem II oxygen-evolving enhancer protein 1 | (RefSeq) uncharacterized protein LOC100820458 (A)
GLYMA_01G182200	569	69.42	0.89	796.333	8.66667	-6.39016	down	2.08832e-70	3.11795e-67	--	--
GLYMA_01G182400	6362	70.3533	16.9933	4210.67	860.667	-2.1581	down	3.74937e-34	8.14895e-32	At2g23450	K13429 chitin elicitor receptor kinase 1 | (RefSeq) chitin elicitor receptor kinase 1 (A)
GLYMA_01G183000	1744	11.02	4.89667	381	143.667	-1.27795	down	2.31415e-06	3.64057e-05	At5g65590	--
GLYMA_01G183400	4758	4.95667	27.37	304.667	1401.33	2.35068	up	2.46913e-25	2.78915e-23	At5g66900	K13457 disease resistance protein RPM1 | (RefSeq) disease resistance protein RPM1 (A)
GLYMA_01G184700	5760	0.956667	2.36333	75.3333	166.333	1.22642	up	0.000421709	0.00373716	At5g66820	--
GLYMA_01G185800	2342	72.9767	192.343	2691.33	5787.33	1.27723	up	3.30848e-07	6.1214e-06	At4g36990	K09419 heat shock transcription factor, other eukaryote | (RefSeq) HSF-01; heat stress transcription factor 1 (A)
GLYMA_01G186500	905	1.47	0.426667	25.3333	6	-1.9034	down	0.00504766	0.0295141	--	--
GLYMA_01G187600	3410	1.73333	0.796667	58.3333	23.3333	-1.22461	down	0.0044339	0.0266515	At4g36930	K12126 phytochrome-interacting factor 3 | (RefSeq) transcription factor PIF3 (A)
GLYMA_01G188600	1724	8.28667	4.55	300.667	132.333	-1.0012	down	0.00440283	0.0265086	At2g23340	K09286 EREBP-like factor | (RefSeq) DNA-binding domain-containing protein (A)
GLYMA_01G189300	1846	0.51	1.54667	17.3333	44.6667	1.49285	up	0.000352618	0.00319412	At3g50120	--
GLYMA_01G190300	1265	60.7033	18.2967	1177	297	-1.84622	down	5.66995e-21	4.71443e-19	At4g37300	--
GLYMA_01G192200	4903	0.493333	1.13	31.3333	60.6667	1.08542	up	0.00333386	0.0212245	At4g37510	K01183 chitinase [EC:3.2.1.14] | (RefSeq) acidic endochitinase (A)
GLYMA_01G193000	2156	7.68667	3.24667	290.333	102.333	-1.35126	down	2.15208e-05	0.000271302	At4g37580	--
GLYMA_01G193600	5870	99.4267	267.997	7931	18013.3	1.32398	up	1.18845e-11	4.08114e-10	At4g37640	K01537 P-type Ca2+ transporter type 2C [EC:7.2.2.10] | (RefSeq) SCA1; plasma membrane Ca2+-ATPase (A)
GLYMA_01G195300	1017	7.02333	21.7	145	374.667	1.50404	up	4.69595e-09	1.16348e-07	At2g22880	--
GLYMA_01G195500	4424	3.54333	1.51667	176.667	64.6667	-1.32921	down	6.30855e-07	1.09467e-05	At5g65890	--
GLYMA_01G195700	692	5.22333	0.596667	65.3333	6	-3.26526	down	3.18634e-07	5.91774e-06	At2g22860	--
GLYMA_01G195800	859	1.82667	0.636667	32	9.33333	-1.63517	down	0.0021953	0.0151714	At2g22850	--
GLYMA_01G196600	1903	17.7767	5.99667	516.333	144.667	-1.68377	down	9.53662e-13	3.72145e-11	At4g37790	K09338 homeobox-leucine zipper protein | (RefSeq) homeobox-leucine zipper protein HAT22 (A)
GLYMA_01G197900	2581	22.14	123.39	921	4294.33	2.36677	up	2.49744e-21	2.14943e-19	At4g37850	K13422 transcription factor MYC2 | (RefSeq) transcription factor MYC1 (A)
GLYMA_01G199600	5357	1.96	6.59	124	350.333	1.63556	up	7.19537e-13	2.84993e-11	At2g35350	K01102 pyruvate dehydrogenase phosphatase [EC:3.1.3.43] | (RefSeq) probable protein phosphatase 2C 4 (A)
GLYMA_01G200100	6571	0.786667	2.00667	47	97.6667	1.22124	up	0.00315281	0.0203052	At1g32450	K14638 solute carrier family 15 (peptide/histidine transporter), member 3/4 | (RefSeq) protein NRT1/ PTR FAMILY 7.3 (A)
GLYMA_01G200500	5008	47.06	23.0133	2539	1049.67	-1.13945	down	6.11467e-12	2.14263e-10	At4g18010	K24221 type I inositol polyphosphate 5-phosphatase IP5P1/2 [EC:3.1.3.56] | (RefSeq) type I inositol polyphosphate 5-phosphatase 2 (A)
GLYMA_01G202200	2039	4.58333	2.38333	190	81.6667	-1.06094	down	0.000279153	0.00261416	At2g45760	--
GLYMA_01G202700	2287	0.08	0.623333	3.33333	24	2.93829	up	0.000340431	0.00310008	At2g35160_1	K11420 [histone H3]-lysine9 N-trimethyltransferase EHMT [EC:2.1.1.355] | (RefSeq) histone-lysine N-methyltransferase, H3 lysine-9 specific SUVH6 (A)
GLYMA_01G203200	1982	33.14	6.74	989.333	167	-2.41427	down	1.43551e-20	1.16538e-18	At4g17670	--
GLYMA_01G203300	2487	18.86	3.67667	821.333	134.333	-2.4727	down	4.6359e-34	1.00124e-31	At4g17680	K19042 E3 ubiquitin-protein ligase BOI and related proteins [EC:2.3.2.27] | (RefSeq) probable BOI-related E3 ubiquitin-protein ligase 2 (A)
GLYMA_01G203400	3137	35.0433	6.79333	1440.67	236	-2.48008	down	3.82993e-31	6.67612e-29	At4g17090	K01177 beta-amylase [EC:3.2.1.2] | (RefSeq) beta-amylase 3, chloroplastic (A)
GLYMA_01G204500	5553	16.6533	8.60333	392.667	172.667	-1.06472	down	1.35022e-05	0.000177378	At5g41150	K10848 DNA excision repair protein ERCC-4 [EC:3.1.-.-] | (RefSeq) DNA repair endonuclease UVH1 isoform X1 (A)
GLYMA_01G204800	2704	105.663	50.25	2637.67	1000.67	-1.20416	down	0.000411193	0.0036534	At4g17030	K20628 expansin | (RefSeq) EXPB8; expansin-B3-like precursor (A)
GLYMA_01G205900	1695	76.2933	166.847	2608	4768.33	1.01668	up	1.82902e-06	2.94186e-05	At4g16820	K16818 phospholipase A1 [EC:3.1.1.32] | (RefSeq) phospholipase A(1) DAD1, chloroplastic (A)
GLYMA_01G207900	2916	2.97667	1.60333	84.3333	37.6667	-1.01373	down	0.00276826	0.0183058	At5g47440	--
GLYMA_01G208800	1092	1.54667	4.53667	35.3333	83.6667	1.41316	up	0.0001569	0.00157958	At4g16640	K07999 matrix metalloproteinase-20 (enamelysin) [EC:3.4.24.-] | (RefSeq) metalloendoproteinase 4-MMP (A)
GLYMA_01G210400	2213	2.28667	0.253333	76.6667	7.66667	-3.26108	down	8.89228e-08	1.8351e-06	At4g17260	K00016 L-lactate dehydrogenase [EC:1.1.1.27] | (RefSeq) L-lactate dehydrogenase B (A)
GLYMA_01G210500	4042	0.79	2.73333	31.3333	97.6667	1.71429	up	0.000345629	0.00314109	At1g12110	K14638 solute carrier family 15 (peptide/histidine transporter), member 3/4 | (RefSeq) protein NRT1/ PTR FAMILY 8.3 (A)
GLYMA_01G211900	3736	15.9433	7.97667	885	377	-1.10514	down	4.54813e-10	1.2929e-08	At4g22730	K13416 brassinosteroid insensitive 1-associated receptor kinase 1 [EC:2.7.10.1 2.7.11.1] | (RefSeq) BRASSINOSTEROID INSENSITIVE 1-associated receptor kinase 1 isoform X1 (A)
GLYMA_01G212100	1377	11.0633	3.91	289.667	85	-1.62015	down	1.98703e-11	6.64408e-10	At2g45360	--
GLYMA_01G212400	3289	0.703333	1.73333	46	96.3333	1.19481	up	9.61292e-05	0.00102295	At1g62870	--
GLYMA_01G212500	2118	2.93	1.15667	63.3333	21.3333	-1.4515	down	0.000348814	0.00316634	At4g22760	--
GLYMA_01G214600	2251	3.23333	9.06667	85	200.333	1.37551	up	1.46332e-07	2.89794e-06	At4g22920	K22013 magnesium dechelatase [EC:4.99.1.10] | (RefSeq) SGR2; senescence-inducible chloroplast stay-green protein 2 (A)
GLYMA_01G216000	9304	3.19667	15.1333	624	2370.67	2.11435	up	4.9201e-12	1.74903e-10	At1g12610	K09286 EREBP-like factor | (RefSeq) AP2 domain transcription factor TINY (A)
GLYMA_01G216500	4145	7.15333	3.13333	311.667	113.667	-1.30944	down	2.74364e-08	6.1459e-07	At3g48150	K03355 anaphase-promoting complex subunit 8 | (RefSeq) anaphase-promoting complex subunit 8 isoform X1 (A)
GLYMA_01G216600	1994	101.54	42.1733	4070.33	1419.33	-1.37535	down	3.21876e-10	9.28063e-09	At4g23030	K03327 multidrug resistance protein, MATE family | (RefSeq) protein DETOXIFICATION 49 (A)
GLYMA_01G217200	3469	3.28333	1.53333	110	44.6667	-1.19483	down	0.000214644	0.00208041	At4g23060	K14561 U3 small nucleolar ribonucleoprotein protein IMP4 | (RefSeq) uncharacterized protein LOC102670478 isoform X1 (A)
GLYMA_01G218200	1211	4.86667	2.16	88	31	-1.31251	down	0.00290186	0.0189773	At3g14260	--
GLYMA_01G219100	7772	0.396667	2.32333	25.6667	123.333	2.4302	up	1.35436e-08	3.15742e-07	At1g63440	K17686 P-type Cu+ transporter [EC:7.2.2.8] | (RefSeq) probable copper-transporting ATPase HMA5 isoform X1 (A)
GLYMA_01G220300	4230	0.393333	0.996667	29.6667	65	1.24719	up	0.00207838	0.0145005	At4g11450	--
GLYMA_01G220800	2854	5.63667	19.6833	231	671.667	1.68715	up	6.62164e-16	3.56965e-14	At5g52430	--
GLYMA_01G221300	1220	2.67667	1.23333	67.3333	25.3333	-1.2464	down	0.00324938	0.0207718	At3g61460	K16281 RING-H2 zinc finger protein RHA1 | (RefSeq) brassinosteroid-responsive RING protein 1 (A)
GLYMA_01G223700	3890	0.893333	2.97	47.6667	136.333	1.63591	up	9.42834e-09	2.24372e-07	At5g41620	--
GLYMA_01G224100	1332	0.66	4.42333	16.6667	99	2.67794	up	9.67244e-10	2.64663e-08	At4g23750	K13434 pathogenesis-related genes transcriptional activator PTI6 | (RefSeq) pathogenesis-related genes transcriptional activator PTI6 (A)
GLYMA_01G224800	1891	2.32667	10.9833	79	317.667	2.13527	up	5.50327e-15	2.75083e-13	At4g23810	K18835 WRKY transcription factor 2 | (RefSeq) WRKY59; probable WRKY transcription factor 2 (A)
GLYMA_01G225100	1917	4.80333	0.473333	145	12	-3.45599	down	1.33506e-20	1.08639e-18	At2g29380	K14497 protein phosphatase 2C [EC:3.1.3.16] | (RefSeq) probable protein phosphatase 2C 8 isoform X1 (A)
GLYMA_01G225800	4306	249.043	103.447	8915	3070.33	-1.38471	down	9.65183e-13	3.75787e-11	At4g10960	K01784 UDP-glucose 4-epimerase [EC:5.1.3.2] | (RefSeq) UDP-glucose 4-epimerase GEPI48 (A)
GLYMA_01G230900	3558	31.4967	15.53	660.667	268.333	-1.14293	down	2.33352e-06	3.66238e-05	At4g10040	K08738 cytochrome c | (RefSeq) uncharacterized protein LOC100305937 (A)
GLYMA_01G231000	612	32.9067	119.233	427.667	1236	1.71966	up	1.37481e-07	2.73846e-06	At1g33760	K09286 EREBP-like factor | (RefSeq) AP2 domain transcription factor TINY (A)
GLYMA_01G232500	5348	28.0533	72.12	2611.67	5726.33	1.26212	up	4.37578e-08	9.47441e-07	At5g16910	K20924 cellulose synthase-like protein [EC:2.4.1.-] | (RefSeq) cellulose synthase-like protein D2 (A)
GLYMA_01G234500	1751	117.057	24.1733	4068.67	719.333	-2.38513	down	1.26359e-34	2.81763e-32	At1g64980	--
GLYMA_01G238800	5721	93.0933	17.05	3782.67	583.333	-2.55981	down	8.27791e-32	1.49612e-29	At5g26340	K24193 MFS transporter, SP family, sugar:H+ symporter | (RefSeq) sugar transport protein 13 (A)
GLYMA_01G239400	1189	5.92	1.43667	146	29	-2.17336	down	1.02799e-09	2.79947e-08	At1g47480	K13258 2-hydroxyisoflavanone dehydratase [EC:4.2.1.105] | (RefSeq) 2-hydroxyisoflavanone dehydratase (A)
GLYMA_01G240300	2414	467.823	231.727	18159.7	7553.33	-1.12684	down	4.02387e-10	1.15054e-08	At1g11580	K01051 pectinesterase [EC:3.1.1.11] | (RefSeq) pectinesterase (A)
GLYMA_01G240900	4123	1.76667	4.19	92.3333	183.667	1.1332	up	0.000102494	0.00108163	At4g05200	K13416 brassinosteroid insensitive 1-associated receptor kinase 1 [EC:2.7.10.1 2.7.11.1] | (RefSeq) BRASSINOSTEROID INSENSITIVE 1-associated receptor kinase 1 (A)
GLYMA_01G241000	3339	4.39	11.05	231.667	491.667	1.22235	up	8.99456e-07	1.52154e-05	At4g05200	K13430 serine/threonine-protein kinase PBS1 [EC:2.7.11.1] | (RefSeq) serine/threonine-protein kinase PBS1 isoform X2 (A)
GLYMA_01G241700	607	11.12	2.6	140.667	26.6667	-2.23118	down	2.7626e-09	7.05336e-08	At3g19660	--
GLYMA_02G000800	1415	3.01667	21.2833	71.3333	406.667	2.68432	up	1.26225e-14	6.07388e-13	At5g43650	--
GLYMA_02G001500	3295	5.19333	2.73333	204.333	92	-1.02123	down	0.00777829	0.0416963	At2g26640	K15397 3-ketoacyl-CoA synthase [EC:2.3.1.199] | (RefSeq) 3-ketoacyl-CoA synthase 11 (A)
GLYMA_02G001700	1990	12.42	3.47667	460.667	106	-1.96082	down	5.1731e-14	2.32823e-12	At3g22970	--
GLYMA_02G003700	13533	11.7	25.6533	633	1189.33	1.02357	up	8.76834e-06	0.00012025	At3g23430	K24195 xenotropic and polytropic retrovirus receptor 1 | (RefSeq) PHO1-H1; phosphate transporter PHO1 (A)
GLYMA_02G005600	2499	5.74667	1.99667	178.667	52.6667	-1.63277	down	1.02169e-07	2.08714e-06	At2g31180	K09422 transcription factor MYB, plant | (RefSeq) transcription factor MYB13 (A)
GLYMA_02G007400	1761	2.53667	6.14667	63.3333	125.333	1.1509	up	0.000661628	0.0054695	At1g02360	K20547 basic endochitinase B [EC:3.2.1.14] | (RefSeq) CHIA1; chitinase class I precursor (A)
GLYMA_02G009300	2653	1.75	0.44	62.3333	14	-2.08025	down	5.72862e-05	0.000652257	At1g02460	K01213 galacturan 1,4-alpha-galacturonidase [EC:3.2.1.67] | (RefSeq) polygalacturonase At1g48100 (A)
GLYMA_02G010100	4407	15.4633	43.18	475.667	1130.67	1.37038	up	1.79127e-11	6.02471e-10	At1g02400	K04125 gibberellin 2beta-dioxygenase [EC:1.14.11.13] | (RefSeq) GA2OX1; gibberellin 2-beta-dioxygenase 2 (A)
GLYMA_02G016600	2703	2.11667	0.84	88	29.3333	-1.45282	down	2.61976e-05	0.000323723	At4g02330	K01051 pectinesterase [EC:3.1.1.11] | (RefSeq) probable pectinesterase/pectinesterase inhibitor 41 (A)
GLYMA_02G017000	915	6.13	2.07333	113.667	32	-1.68528	down	3.41328e-07	6.2958e-06	At1g02810_2	--
GLYMA_02G018300	4186	17.1833	8.97	446.333	193	-1.0613	down	1.59399e-05	0.000206168	--	--
GLYMA_02G018500	1293	17.0167	6.79333	451	149.667	-1.45199	down	3.86499e-06	5.78065e-05	At4g02440	--
GLYMA_02G018900	1404	2.66667	0.906667	46	13.6667	-1.65314	down	0.000436566	0.00385093	At1g74500	--
GLYMA_02G022200	6616	3.01	1.48333	121.333	51	-1.12304	down	0.000437039	0.00385213	At1g69850	K14638 solute carrier family 15 (peptide/histidine transporter), member 3/4 | (RefSeq) protein NRT1/ PTR FAMILY 4.5 (A)
GLYMA_02G022300	2356	4.41	9.65333	157.667	285.667	1.00616	up	5.82627e-05	0.000662058	At4g40060	K09338 homeobox-leucine zipper protein | (RefSeq) homeobox-leucine zipper protein HOX20 (A)
GLYMA_02G024200	8084	29.75	80.0967	1321	2966	1.31948	up	3.20565e-08	7.11583e-07	At1g27100	--
GLYMA_02G026300	2397	35.93	11.2733	1296	343	-1.78068	down	1.25068e-20	1.02258e-18	At1g70000	--
GLYMA_02G026500	1818	7.05	3.50333	247	108.667	-1.10155	down	0.00176209	0.0126447	At1g27200	--
GLYMA_02G028400	815	51.2867	12.7133	843.333	175.667	-2.13027	down	8.59217e-18	5.50476e-16	--	--
GLYMA_02G028700	11773	0.37	0.05	86.3333	10.3333	-2.93722	down	2.42236e-12	8.97345e-11	At1g59970	K07999 matrix metalloproteinase-20 (enamelysin) [EC:3.4.24.-] | (RefSeq) metalloendoproteinase 4-MMP (A)
GLYMA_02G028800	1912	71.9	8.86333	2677	286.333	-3.11969	down	6.16603e-40	1.96057e-37	At1g59970	K07999 matrix metalloproteinase-20 (enamelysin) [EC:3.4.24.-] | (RefSeq) metalloendoproteinase 4-MMP (A)
GLYMA_02G029900	2284	3.67667	0.266667	122.333	7.66667	-3.87533	down	6.97577e-19	4.92897e-17	At1g24100	K11820 N-hydroxythioamide S-beta-glucosyltransferase [EC:2.4.1.195] | (RefSeq) UDP-glycosyltransferase 74B1 (A)
GLYMA_02G031800	2111	0.846667	2.07667	31.6667	63.6667	1.16707	up	0.00461183	0.0274948	At1g70230	K23877 xyloglucan O-acetyltransferase | (RefSeq) protein ALTERED XYLOGLUCAN 4 isoform X1 (A)
GLYMA_02G033600	7781	43.61	12.9367	2951	742	-1.8565	down	3.46715e-13	1.42932e-11	At1g70300	K03549 KUP system potassium uptake protein | (RefSeq) potassium transporter 6 (A)
GLYMA_02G033700	2337	12.9733	3.50667	586.667	134.667	-1.99507	down	2.09912e-19	1.58775e-17	7294194	K03008 DNA-directed RNA polymerase II subunit RPB11 | (RefSeq) protein VAPYRIN-LIKE isoform X1 (A)
GLYMA_02G035200	1371	28.15	101.167	801.667	2340.33	1.72165	up	2.01686e-10	5.95007e-09	At1g23710	--
GLYMA_02G036400	1837	4.67333	0.543333	176	17	-3.22631	down	4.35867e-19	3.15109e-17	At1g23390	--
GLYMA_02G039400	3635	0.82	2.28333	45.3333	106.333	1.36321	up	5.53508e-06	7.96625e-05	At1g67900	--
GLYMA_02G042200	4383	1.54667	3.45667	68	131.333	1.0639	up	0.000261271	0.00246756	At2g17650	K23618 acyl-activating enzyme 11/12 [EC:6.2.1.2 6.2.1.-] | (RefSeq) trans-cinnamate:CoA ligase, peroxisomal (A)
GLYMA_02G042700	1100	27.4	14.25	625	264	-1.07614	down	0.00351506	0.0221541	At2g17680	--
GLYMA_02G044600	3049	0.456667	1.66333	17	51	1.7264	up	0.000991707	0.0077805	At1g30570	K13430 serine/threonine-protein kinase PBS1 [EC:2.7.11.1] | (RefSeq) probable serine/threonine-protein kinase PBL7 isoform X1 (A)
GLYMA_02G046600	7101	0.576667	2.34	47.3333	168.333	1.94143	up	1.32745e-06	2.179e-05	At2g17820	K14489 arabidopsis histidine kinase 2/3/4 (cytokinin receptor) [EC:2.7.13.3] | (RefSeq) histidine kinase 3 (A)
GLYMA_02G047400	2484	17.4167	3.6	412	74	-2.37564	down	3.22036e-17	1.95729e-15	At4g38660	K12173 BRCA1-A complex subunit BRE | (RefSeq) BRISC and BRCA1-A complex member 2 (A)
GLYMA_02G047900	906	1.7	0.503333	31	7.66667	-1.86609	down	0.00738522	0.039995	At4g36040	K03686 molecular chaperone DnaJ | (RefSeq) chaperone protein DnaJ (A)
GLYMA_02G048400	11256	0.506667	0.146667	91	22.6667	-1.88796	down	1.07158e-06	1.79153e-05	At3g51240	K00475 naringenin 3-dioxygenase [EC:1.14.11.9] | (RefSeq) F3H; flavanone 3-hydroxylase (A)
GLYMA_02G049700	8399	12.05	4.43	570.333	180.333	-1.54649	down	4.13639e-11	1.32627e-09	At1g19860	--
GLYMA_02G049900	156	49.1433	25.62	159	67.6667	-1.07045	down	0.0013645	0.0101907	--	--
GLYMA_02G050300	3393	0.0933333	0.346667	6	20	1.84537	up	0.00508854	0.0296929	At4g36180	K13415 protein brassinosteroid insensitive 1 [EC:2.7.10.1 2.7.11.1] | (RefSeq) BRI1B; brassinosteroid receptor precursor (A)
GLYMA_02G051600	7810	0.95	2.57667	71.3333	162	1.32783	up	3.35343e-05	0.000404769	At4g36380	K12637 3-epi-6-deoxocathasterone 23-monooxygenase [EC:1.14.14.147] | (RefSeq) 3-epi-6-deoxocathasterone 23-monooxygenase CYP90C1 isoform X1 (A)
GLYMA_02G054800	8834	9.52333	29.61	606	1580.67	1.5243	up	1.15942e-17	7.33234e-16	At2g36230	K01814 phosphoribosylformimino-5-aminoimidazole carboxamide ribotide isomerase [EC:5.3.1.16] | (RefSeq) uncharacterized protein LOC100800577 (A)
GLYMA_02G054900	823	7.76333	58.3433	133.667	813	2.77384	up	4.67225e-24	4.93678e-22	At4g36500	--
GLYMA_02G055000	1189	16.0733	67.3867	398	1357.67	1.93809	up	4.52135e-12	1.61564e-10	At4g36500	--
GLYMA_02G055500	4244	13.48	31.6	759.333	1494.33	1.11872	up	5.24914e-07	9.29151e-06	At4g36550	--
GLYMA_02G055600	159	6.40333	24.8133	18.6667	67	1.90597	up	0.00273863	0.0181483	--	--
GLYMA_02G057500	6132	0.716667	0.23	27	7.33333	-1.75026	down	0.002835	0.018643	At3g50660	K09587 steroid 22-alpha-hydroxylase [EC:1.14.13.-] | (RefSeq) cytochrome P450 90B1 (A)
GLYMA_02G057900	3402	59.8667	27.3867	1516.33	571.667	-1.24935	down	1.67189e-08	3.85061e-07	At5g65650	--
GLYMA_02G058000	2875	2.67667	0.49	104.333	15.6667	-2.57178	down	2.23015e-08	5.0751e-07	At2g18480	K08150 MFS transporter, SP family, solute carrier family 2 (myo-inositol transporter), member 13 | (RefSeq) inositol transporter 1 (A)
GLYMA_02G059200	5367	9.47	2.34667	457.333	95.6667	-2.12421	down	4.96334e-23	4.89773e-21	At2g23790	K20858 calcium uniporter protein, mitochondrial | (RefSeq) calcium uniporter protein 2, mitochondrial isoform X1 (A)
GLYMA_02G059400	1322	0.97	0.246667	26	5.66667	-2.06587	down	0.00218787	0.0151475	At3g50760	K20893 probable galacturonosyltransferase-like 1 [EC:2.4.1.-] | (RefSeq) probable galacturonosyltransferase-like 2 (A)
GLYMA_02G061000	2311	12.48	6.47333	223.333	95.6667	-1.07275	down	0.000127967	0.00131726	At3g50810	--
GLYMA_02G062600	3345	4.32667	2.28667	124.333	54.6667	-1.03622	down	0.00395251	0.0243025	At2g23540	--
GLYMA_02G062700	705	23.79	8.05333	336	96	-1.67278	down	9.46969e-14	4.14782e-12	At3g50410	--
GLYMA_02G063600	4596	2.36333	6.11333	73	156.667	1.2451	up	5.45994e-06	7.88122e-05	At2g23620	--
GLYMA_02G063900	6877	6.80333	33.5233	346	1399.67	2.18102	up	1.49388e-13	6.38854e-12	At1g61560	K08472 mlo protein | (RefSeq) MLO-like protein 12 (A)
GLYMA_02G064400	1541	26.8667	108.457	489.333	1616.33	1.89496	up	0.00769369	0.0413202	At2g02990	K01166 ribonuclease T2 [EC:4.6.1.19] | (RefSeq) ribonuclease T2 family protein precursor (A)
GLYMA_02G067500	4315	49.1267	5.97667	1439	143.333	-3.16632	down	7.18808e-19	5.06856e-17	At3g26690	K07766 diphosphoinositol-polyphosphate diphosphatase [EC:3.6.1.52] | (RefSeq) nudix hydrolase 12, mitochondrial (A)
GLYMA_02G068400	2924	13.5	6.56333	278.667	114	-1.15405	down	1.48203e-07	2.93162e-06	At3g53860	--
GLYMA_02G070000	2706	0.44	1.73	15.6667	51.3333	1.84503	up	2.18619e-05	0.000275198	At3g04070	--
GLYMA_02G072200	4304	4.38667	2.34333	156.333	69.6667	-1.02898	down	0.00284534	0.0186931	At5g18170	K00261 glutamate dehydrogenase (NAD(P)+) [EC:1.4.1.3] | (RefSeq) glutamate dehydrogenase 1 (A)
GLYMA_02G072400	553	233.943	119.537	2677	1124	-1.0982	down	0.00010953	0.00114498	--	--
GLYMA_02G072500	1874	11.2567	4.39333	308.667	97.6667	-1.48653	down	5.45443e-06	7.87659e-05	At3g03870	K00640 serine O-acetyltransferase [EC:2.3.1.30] | (RefSeq) serine acetyltransferase 3, mitochondrial (A)
GLYMA_02G072800	1622	10.65	1.68	359.333	46.3333	-2.7931	down	6.93744e-18	4.50343e-16	At5g19790	K09286 EREBP-like factor | (RefSeq) ethylene-responsive transcription factor ERN1 (A)
GLYMA_02G075600	2511	1.95667	8.13667	95.3333	344.667	1.96895	up	1.04301e-13	4.53377e-12	At1g34300	K13416 brassinosteroid insensitive 1-associated receptor kinase 1 [EC:2.7.10.1 2.7.11.1] | (RefSeq) BRASSINOSTEROID INSENSITIVE 1-associated receptor kinase 1 isoform X1 (A)
GLYMA_02G078500	6337	94.2667	33.9167	4467	1327	-1.59402	down	3.24435e-15	1.65053e-13	At1g74320	K14156 choline/ethanolamine kinase [EC:2.7.1.32 2.7.1.82] | (RefSeq) GmCK1p (A)
GLYMA_02G080200	2958	87.8933	21.5567	4052	859.667	-2.1272	down	4.61739e-19	3.33112e-17	At5g50080	K09286 EREBP-like factor | (RefSeq) APETALA2/ethylene responsive factor-like protein (A)
GLYMA_02G080900	8210	63.7033	26.0167	5165	1824.67	-1.39269	down	7.934e-08	1.64624e-06	At4g39350	K10999 cellulose synthase A [EC:2.4.1.12] | (RefSeq) cellulose synthase A catalytic subunit 2 [UDP-forming] (A)
GLYMA_02G081900	4518	0.24	1.02667	6.33333	23.6667	2.0185	up	0.00357707	0.0224646	At1g43650	--
GLYMA_02G082000	2947	2.99333	1.02	128	37	-1.66095	down	2.47963e-07	4.69926e-06	At1g76890	--
GLYMA_02G084100	9293	1.29	3.18	111	240	1.21187	up	0.00039371	0.00351991	At1g76950	K24810 inhibitor of Bruton tyrosine kinase | (RefSeq) uncharacterized protein LOC100800604 isoform X1 (A)
GLYMA_02G087000	8164	3.91667	9.62	425	889.333	1.19174	up	3.02212e-10	8.73567e-09	At5g35750	K14489 arabidopsis histidine kinase 2/3/4 (cytokinin receptor) [EC:2.7.13.3] | (RefSeq) histidine kinase 4 isoform X2 (A)
GLYMA_02G088700	3105	2.38333	9.58667	119.667	402.667	1.88854	up	5.45861e-09	1.34083e-07	At1g66880	K20718 LRR receptor-like serine/threonine-protein kinase ERECTA [EC:2.7.11.1] | (RefSeq) LRR receptor-like serine/threonine-protein kinase ERL1 (A)
GLYMA_02G089400	415	4.18667	39.95	33.3333	257	3.11079	up	9.62196e-23	9.19161e-21	--	--
GLYMA_02G089500	711	4.82	16.5767	71.3333	198.667	1.6458	up	3.96905e-07	7.21531e-06	--	--
GLYMA_02G090800	2876	38.9567	13.91	2286.33	677.333	-1.60437	down	5.40371e-17	3.21044e-15	At1g77840	K03262 translation initiation factor 5 | (RefSeq) translation initiation factor IF2/IF5 (A)
GLYMA_02G092300	816	3.29333	1.37	53.3333	19	-1.36489	down	0.000618621	0.00518006	At2g44310	--
GLYMA_02G092500	1330	17.9567	6.12667	308.667	88	-1.66672	down	1.59002e-08	3.67191e-07	At2g39530	--
GLYMA_02G094500	859	91.9633	27.6633	1659	401.667	-1.86362	down	1.81411e-10	5.38431e-09	At2g37430	--
GLYMA_02G095900	5335	7.81	3.88	610.667	255.667	-1.12045	down	5.76737e-10	1.61675e-08	At2g39440_2	--
GLYMA_02G096600	2700	4.20667	1.39667	137.333	38	-1.71043	down	5.93247e-09	1.44997e-07	At1g69040	K00688 glycogen phosphorylase [EC:2.4.1.1] | (RefSeq) glycogen phosphorylase 1 (A)
GLYMA_02G099500	2223	231.667	89.42	10497	3362.33	-1.48954	down	2.44893e-15	1.26081e-13	At1g25560	K09287 RAV-like factor | (RefSeq) AP2/ERF and B3 domain-containing transcription repressor TEM1 (A)
GLYMA_02G100300	4798	4.19667	20.62	199.333	809.333	2.17964	up	2.44428e-15	1.26031e-13	At5g38280	K13430 serine/threonine-protein kinase PBS1 [EC:2.7.11.1] | (RefSeq) serine/threonine-protein kinase PBS1 isoform X2 (A)
GLYMA_02G102800	4808	10.8233	4.86	441	162.333	-1.27407	down	0.00157524	0.0114873	At3g19310	--
GLYMA_02G104300	2264	1.36667	4.04667	62	154.667	1.45529	up	2.2924e-07	4.38068e-06	At4g34131	K14595 abscisate beta-glucosyltransferase [EC:2.4.1.263] | (RefSeq) abscisate beta-glucosyltransferase (A)
GLYMA_02G104500	2550	0.49	1.66	24.6667	71.3333	1.65772	up	2.97224e-05	0.000363744	At2g36800	K14595 abscisate beta-glucosyltransferase [EC:2.4.1.263] | (RefSeq) abscisate beta-glucosyltransferase (A)
GLYMA_02G104600	1889	10.6433	24.4467	398.667	781	1.09379	up	2.41473e-09	6.22069e-08	At2g15480	K23260 scopoletin glucosyltransferase [EC:2.4.1.128] | (RefSeq) scopoletin glucosyltransferase (A)
GLYMA_02G104900	1978	0.803333	5.08	31	169.333	2.57541	up	6.07193e-15	3.01751e-13	At4g34131	K23260 scopoletin glucosyltransferase [EC:2.4.1.128] | (RefSeq) scopoletin glucosyltransferase (A)
GLYMA_02G105300	3612	1.19333	2.56333	84	157.333	1.00981	up	0.000248768	0.00236509	At4g34131	K23260 scopoletin glucosyltransferase [EC:2.4.1.128] | (RefSeq) scopoletin glucosyltransferase (A)
GLYMA_02G106700	3174	19.1767	10.0867	587.667	262.667	-1.03392	down	2.31029e-08	5.22975e-07	At1g69640	K04713 sphinganine C4-monooxygenase [EC:1.14.18.5] | (RefSeq) sphinganine C4-monooxygenase 1 (A)
GLYMA_02G108300	1262	63.6633	7.95	1668.67	170.667	-3.1278	down	7.73814e-29	1.09353e-26	At1g26800	K11982 E3 ubiquitin-protein ligase RNF115/126 [EC:2.3.2.27] | (RefSeq) E3 ubiquitin-protein ligase RING1 (A)
GLYMA_02G109100	2454	2.41	0.976667	80.6667	28.6667	-1.398	down	0.00116079	0.00888975	At1g26770	K20628 expansin | (RefSeq) expansin-A15 (A)
GLYMA_02G111500	15718	43.06	17.8467	3125	1102	-1.37581	down	3.47265e-11	1.12183e-09	At1g69450	K21989 calcium permeable stress-gated cation channel | (RefSeq) CSC1-like protein At1g69450 isoform X1 (A)
GLYMA_02G114100	2381	0.29	1.74333	9.66667	47.6667	2.45487	up	4.579e-07	8.2154e-06	At2g02030	--
GLYMA_02G118500	5244	4.9	13.16	212	491	1.32536	up	2.61497e-07	4.93667e-06	At1g13740	--
GLYMA_02G120800	4412	1.35667	3.61	105.333	252.333	1.33341	up	0.000135276	0.00138215	At3g24240	K00924 kinase [EC:2.7.1.-] | (RefSeq) NARK; nodule autoregulation receptor kinase precursor (A)
GLYMA_02G121900	3021	2.44667	0.453333	153	23.3333	-2.55399	down	2.48198e-12	9.17452e-11	At3g51550	K13430 serine/threonine-protein kinase PBS1 [EC:2.7.11.1] | (RefSeq) serine/threonine-protein kinase (A)
GLYMA_02G122000	3111	0.503333	0.0933333	27.6667	4.66667	-2.51745	down	0.00189546	0.0134123	At3g51550	K13430 serine/threonine-protein kinase PBS1 [EC:2.7.11.1] | (RefSeq) probable serine/threonine-protein kinase PBL7 (A)
GLYMA_02G124300	1864	3.64667	1.36	88	27	-1.54514	down	0.000798492	0.00644727	At5g10280	K09422 transcription factor MYB, plant | (RefSeq) transcription factor MYB92 (A)
GLYMA_02G125600	2733	51.1667	280.72	2315.67	10684.3	2.35008	up	3.37864e-18	2.23903e-16	At2g14960	K14487 auxin responsive GH3 gene family | (RefSeq) probable indole-3-acetic acid-amido synthetase GH3.1 (A)
GLYMA_02G125800	2407	0.993333	3.25	48.6667	133	1.59364	up	9.96357e-06	0.000135077	--	--
GLYMA_02G125900	799	14.78	81.74	241	1101	2.35044	up	8.36482e-22	7.49994e-20	--	--
GLYMA_02G126100	600	1.72333	0.26	20.6667	2.66667	-2.83168	down	0.00038617	0.00346061	At5g15830	--
GLYMA_02G127300	2921	3.34333	1.69333	89	37.6667	-1.09544	down	0.00188528	0.0133568	At1g68850	K00430 peroxidase [EC:1.11.1.7] | (RefSeq) peroxidase 11 isoform X1 (A)
GLYMA_02G128400	1765	1.08	0.396667	36.6667	10.6667	-1.59456	down	0.00644821	0.0360344	At4g38870	--
GLYMA_02G128700	1251	2.26333	4.93	56.3333	104	1.02044	up	0.000848386	0.00679105	At3g25590	--
GLYMA_02G128800	2050	12.2367	66.9	466.667	2115.33	2.33411	up	3.29741e-24	3.52751e-22	At1g13480	--
GLYMA_02G130200	6686	2.11	5.10667	126	262.333	1.17416	up	1.28184e-05	0.00016989	At1g68740	K24195 xenotropic and polytropic retrovirus receptor 1 | (RefSeq) PHO1-H14; phosphate transporter PHO1 homolog 1 (A)
GLYMA_02G130600	5057	0.81	2.09	40.3333	87	1.249	up	0.000302077	0.00279605	At3g25620	K05681 ATP-binding cassette, subfamily G (WHITE), member 2 | (RefSeq) ABC transporter G family member 21 (A)
GLYMA_02G131300	288	2.45	7.16667	14.3333	34.6667	1.43006	up	0.00391029	0.0241123	--	--
GLYMA_02G131700	4237	1.51333	4.44667	97.3333	240.667	1.44315	up	1.44744e-10	4.35629e-09	At3g19290	K14432 ABA responsive element binding factor | (RefSeq) BZIP1; bZIP transcription factor 1 (A)
GLYMA_02G132500	1062	49.6967	192.093	1068.67	3450.33	1.83558	up	4.24266e-23	4.21077e-21	At4g34410	K09286 EREBP-like factor | (RefSeq) EBP; uncharacterized protein LOC100819416 (A)
GLYMA_02G134300	4999	10.4833	5.16333	472	202.667	-1.1196	down	1.96645e-05	0.000249919	At3g50620	--
GLYMA_02G134400	4643	172.04	75.7	6239.33	2319	-1.29525	down	2.38458e-17	1.47013e-15	At3g19130	K13201 nucleolysin TIA-1/TIAR | (RefSeq) oligouridylate-binding protein 1 isoform X1 (A)
GLYMA_02G135100	3001	9.23	49.4533	263	1162.67	2.30126	up	1.32795e-14	6.37788e-13	At1g49570	K00430 peroxidase [EC:1.11.1.7] | (RefSeq) peroxidase 10 (A)
GLYMA_02G135200	2980	11.6033	54.02	319	1264	2.10982	up	4.23639e-13	1.71756e-11	At1g49570	K00430 peroxidase [EC:1.11.1.7] | (RefSeq) uncharacterized protein LOC100805712 precursor (A)
GLYMA_02G135400	3228	13.4533	5.66	555.333	201	-1.34847	down	2.34967e-09	6.07131e-08	At1g49560	K14491 two-component response regulator ARR-B family | (RefSeq) two-component response regulator ARR12 (A)
GLYMA_02G135800	741	6.35667	1.56667	97.3333	19.6667	-2.15143	down	2.37711e-07	4.52494e-06	--	--
GLYMA_02G136100	2258	1.13	3.18333	34	77.3333	1.36176	up	0.000968585	0.00762347	At3g19000	K24028 salicylic acid 3-hydroxylase [EC:1.14.11.-] | (RefSeq) protein DMR6-LIKE OXYGENASE 2 isoform X1 (A)
GLYMA_02G136600	4185	1.17	0.25	41.3333	7.66667	-2.32318	down	0.000141742	0.00144092	At3g02330	K23541 Ca2+/H+ antiporter, TMEM165/GDT1 family | (RefSeq) putative pentatricopeptide repeat-containing protein At3g23330 (A)
GLYMA_02G136700	2078	97.6667	15.9133	2298	308	-2.7365	down	4.89221e-28	6.36358e-26	At2g15890	--
GLYMA_02G138300	2712	2.52	5.72667	61	117.667	1.07133	up	0.00149028	0.0109538	At3g59710	K00079 carbonyl reductase 1 [EC:1.1.1.184 1.1.1.189 1.1.1.197] | (RefSeq) (+)-neomenthol dehydrogenase (A)
GLYMA_02G141400	1781	42.5633	11.9	1002.67	233.667	-1.95766	down	3.49151e-22	3.21334e-20	At3g13720	K20359 PRA1 family protein 1 | (RefSeq) PRA1 family protein F3 isoform X5 (A)
GLYMA_02G146100	1891	2.4	0.786667	87.6667	24	-1.72413	down	0.000190883	0.00187766	At3g22550	--
GLYMA_02G148600	1459	1.65667	0.466667	49.6667	11.6667	-1.95833	down	0.00100951	0.00789407	At3g63110	K10760 adenylate dimethylallyltransferase (cytokinin synthase) [EC:2.5.1.27 2.5.1.112] | (RefSeq) adenylate isopentenyltransferase 3, chloroplastic (A)
GLYMA_02G149000	777	3.55333	0.936667	57	12.3333	-2.04703	down	3.28407e-05	0.000397375	--	--
GLYMA_02G150600	2362	9.36	22.9533	415.667	867	1.18679	up	2.52003e-05	0.00031275	At2g48010	K13416 brassinosteroid insensitive 1-associated receptor kinase 1 [EC:2.7.10.1 2.7.11.1] | (RefSeq) BRASSINOSTEROID INSENSITIVE 1-associated receptor kinase 1 (A)
GLYMA_02G151100	2752	1.84333	4	75.3333	138.667	1.00655	up	8.29236e-05	0.000900853	At3g63010	K14493 gibberellin receptor GID1 [EC:3.-.-.-] | (RefSeq) gibberellin receptor GID1B (A)
GLYMA_02G151900	1045	2.53333	8.27	54	146.333	1.58259	up	1.61414e-08	3.72011e-07	--	--
GLYMA_02G152500	1103	1.05333	2.76333	23	52	1.28242	up	0.00410184	0.0250725	--	--
GLYMA_02G152800	3271	18.3733	5.05	1012	234.333	-1.98052	down	1.21435e-19	9.37094e-18	At3g62980	K14485 transport inhibitor response 1 | (RefSeq) TIR1A; protein TRANSPORT INHIBITOR RESPONSE 1A (A)
GLYMA_02G155600	2395	124.67	35.2767	3716.67	858.667	-1.94473	down	3.04167e-15	1.55202e-13	At2g47710	--
GLYMA_02G155700	6468	1.67	0.25	51.3333	6.33333	-2.86884	down	5.19206e-07	9.20471e-06	At1g02850	K19964 hydroxyisourate hydrolase [EC:3.5.2.17] | (RefSeq) hydroxyisourate hydrolase (A)
GLYMA_02G157800	4978	31.2233	6.16333	1689.33	282.333	-2.45081	down	6.03173e-52	3.45216e-49	At5g05140	--
GLYMA_02G157900	1466	19.2667	0.826667	474	17.3333	-4.64579	down	1.32185e-50	7.20511e-48	At3g05570	--
GLYMA_02G158200	5552	405.823	202.94	7458.67	3070.67	-1.12106	down	1.10089e-07	2.23036e-06	At1g71950	--
GLYMA_02G158400	9147	0.15	0.0566667	27.3333	8.66667	-1.5131	down	0.00730103	0.0396314	At1g35647	K16298 serine carboxypeptidase-like clade IV [EC:3.4.16.-] | (RefSeq) serine carboxypeptidase-like isoform X1 (A)
GLYMA_02G162300	24886	5.34333	2.65667	417	174.333	-1.11783	down	9.08899e-07	1.53525e-05	At2g40860_2	K17506 protein phosphatase 1L [EC:3.1.3.16] | (RefSeq) probable protein phosphatase 2C 59 (A)
GLYMA_02G164100	3994	1.03667	2.47	23	45	1.12228	up	0.00947703	0.0486532	Hs20357568	K06133 4'-phosphopantetheinyl transferase [EC:2.7.8.-] | (RefSeq) L-aminoadipate-semialdehyde dehydrogenase-phosphopantetheinyl transferase isoform X1 (A)
GLYMA_02G167600	2333	51.7	20.5767	1867	614.333	-1.44909	down	8.65162e-13	3.38765e-11	At3g11910	K11838 ubiquitin carboxyl-terminal hydrolase 7 [EC:3.4.19.12] | (RefSeq) ubiquitin C-terminal hydrolase 12 isoform X1 (A)
GLYMA_02G168000	7354	0.89	2.41	25.3333	61	1.36433	up	0.000747363	0.00607011	At3g11950	K12501 homogentisate solanesyltransferase [EC:2.5.1.117] | (RefSeq) VTE2-2; homogentisate phytyltransferase VTE2-2 (A)
GLYMA_02G168400	3158	9.79667	4.78333	357.667	144	-1.15591	down	2.83093e-06	4.37902e-05	At3g11950	--
GLYMA_02G171200	5593	8.59333	1.43667	754.667	107.333	-2.68367	down	1.76089e-26	2.13671e-24	At5g06700	K23877 xyloglucan O-acetyltransferase | (RefSeq) protein ALTERED XYLOGLUCAN 4 isoform X1 (A)
GLYMA_02G171300	2691	9.59667	1.83333	343.333	55	-2.50191	down	2.15219e-16	1.22159e-14	At5g06710	K09338 homeobox-leucine zipper protein | (RefSeq) homeobox-leucine zipper protein HOX11 (A)
GLYMA_02G176000	2654	4.32	2.15333	119.333	51	-1.11103	down	0.000406195	0.00361366	At3g12160	K07904 Ras-related protein Rab-11A | (RefSeq) ras-related protein RABA4d (A)
GLYMA_02G182300	847	8.61667	0.673333	149.333	9.66667	-3.79719	down	3.73382e-20	2.93409e-18	--	--
GLYMA_02G182400	4116	7.17	3.14	356.333	132.667	-1.30049	down	3.11608e-08	6.93494e-07	At3g57550	K00942 guanylate kinase [EC:2.7.4.8] | (RefSeq) guanylate kinase 2 (A)
GLYMA_02G182600	2704	6.54	2.01667	158.333	41.6667	-1.80229	down	1.82274e-10	5.40526e-09	At2g41870	--
GLYMA_02G186900	3755	87.1333	47.1967	1366.33	625	-1.00687	down	0.000399394	0.00356331	At3g10300	K13448 calcium-binding protein CML | (RefSeq) calcium-binding protein CBP (A)
GLYMA_02G188000	4270	1.3	0.63	97.3333	39	-1.17059	down	0.000339506	0.00309412	At3g23880	K00962 polyribonucleotide nucleotidyltransferase [EC:2.7.7.8] | (RefSeq) polyribonucleotide nucleotidyltransferase 1, chloroplastic (A)
GLYMA_02G195900	1257	81.1767	29.4833	2089.67	627.333	-1.57703	down	9.24781e-10	2.53448e-08	At2g35930	--
GLYMA_02G197300	1576	4.5	1.26	139.333	33.3333	-1.9364	down	1.25094e-08	2.93425e-07	--	--
GLYMA_02G197800	1251	17.0367	64.2567	431.333	1355	1.80099	up	2.3067e-18	1.5593e-16	At2g35980	--
GLYMA_02G198200	1997	3.50333	9.43333	142.667	319.333	1.30778	up	5.82573e-08	1.23491e-06	At3g52500	K22683 aspartyl protease family protein [EC:3.4.23.-] | (RefSeq) aspartyl protease family protein 2 (A)
GLYMA_02G202900	2519	7.73667	2.52	387.667	107.667	-1.72651	down	5.94415e-16	3.21452e-14	At4g30960	K07198 5'-AMP-activated protein kinase, catalytic alpha subunit [EC:2.7.11.11] | (RefSeq) CBL-interacting protein kinase 2 (A)
GLYMA_02G203300	5685	21.5667	7.9	894.333	276.333	-1.56181	down	1.61988e-19	1.24167e-17	At4g30950	K10255 acyl-lipid omega-6 desaturase (Delta-12 desaturase) [EC:1.14.19.23 1.14.19.45] | (RefSeq) FAD6.1; omega-6 fatty acid desaturase, chloroplastic (A)
GLYMA_02G203400	1341	3.77333	1.39333	103.333	31.6667	-1.55984	down	2.06226e-06	3.27255e-05	At2g24240	--
GLYMA_02G205000	1925	1.25	2.70333	44.6667	83.3333	1.01636	up	0.00169403	0.0122264	--	--
GLYMA_02G206300	6190	8.28667	0.953333	506.333	48.6667	-3.23689	down	4.88841e-33	9.87459e-31	At2g24130	K13420 LRR receptor-like serine/threonine-protein kinase FLS2 [EC:2.7.11.1] | (RefSeq) probable LRR receptor-like serine/threonine-protein kinase At3g47570 (A)
GLYMA_02G206600	4303	2.67333	1.23	109.667	42.6667	-1.23535	down	0.000358981	0.00324747	At2g24100	--
GLYMA_02G208200	1214	118.453	488.913	2895	9994.33	1.93201	up	2.68122e-19	1.99292e-17	At4g08950	--
GLYMA_02G208500	3574	32.6733	9.05667	1037	237.333	-1.97148	down	7.22637e-20	5.61433e-18	At1g78290	K14498 serine/threonine-protein kinase SRK2 [EC:2.7.11.1] | (RefSeq) serine/threonine-protein kinase SAPK2 (A)
GLYMA_02G210000	9057	12.43	4.29667	231.333	64.3333	-1.65549	down	5.53559e-05	0.000632586	--	--
GLYMA_02G210400	2078	1.06	2.65333	46.6667	92.6667	1.18845	up	0.00716881	0.0391192	At1g72220	K10664 E3 ubiquitin-protein ligase ATL6/9/15/31/42/55 [EC:2.3.2.27] | (RefSeq) E3 ubiquitin-protein ligase ATL6 (A)
GLYMA_02G212100	1419	4.52333	21.9167	120	489	2.17115	up	8.83622e-18	5.65058e-16	At3g60520	--
GLYMA_02G213500	1477	2.67667	0.92	80.3333	23	-1.65357	down	1.66593e-05	0.000214422	At5g49700	--
GLYMA_02G215300	3869	2.35333	5.21333	100.333	193.333	1.05259	up	0.00189994	0.0134385	At4g24480	K14510 serine/threonine-protein kinase CTR1 [EC:2.7.11.1] | (RefSeq) serine/threonine-protein kinase CTR1 (A)
GLYMA_02G216600	21132	49.07	25.2833	1136.33	486	-1.07469	down	1.99185e-06	3.17255e-05	At4g37940	K09264 MADS-box transcription factor, plant | (RefSeq) MADS-box transcription factor 23 isoform X5 (A)
GLYMA_02G217500	1628	0.953333	2.56	30	70.6667	1.34127	up	0.00119705	0.00912067	At5g09620	--
GLYMA_02G217600	10402	10.17	2.16	1277	228.667	-2.34509	down	6.92745e-33	1.38307e-30	At5g64460	--
GLYMA_02G217800	2298	93.98	3.35667	2570.33	76.6667	-4.92555	down	2.28174e-95	9.79438e-92	At5g65640	K13422 transcription factor MYC2 | (RefSeq) transcription factor MYC1 (A)
GLYMA_02G217900	1312	1.86667	0.44	36	7	-2.22085	down	0.000144795	0.00146804	At5g65660	--
GLYMA_02G220500	7188	15.31	5.49667	910	282	-1.57159	down	7.28196e-08	1.52199e-06	At4g27870	--
GLYMA_02G221200	1902	27.3567	10.3767	793	253.333	-1.51787	down	1.17712e-08	2.77054e-07	At5g24600	--
GLYMA_02G222400	3122	942.53	288.41	33538	8583	-1.82557	down	1.70375e-26	2.0747e-24	At2g36460	K01623 fructose-bisphosphate aldolase, class I [EC:4.1.2.13] | (RefSeq) putative fructose-bisphosphate aldolase (A)
GLYMA_02G224200	4779	18.5133	9.44667	818.333	352.667	-1.07977	down	1.86559e-09	4.87182e-08	At3g46980	K08193 MFS transporter, ACS family, solute carrier family 17 (sodium-dependent inorganic phosphate cotransporter), other | (RefSeq) probable anion transporter 3, chloroplastic (A)
GLYMA_02G225400	4170	2.13333	0.85	146.333	49	-1.44656	down	6.43678e-05	0.000721878	At5g51980	K13175 THO complex subunit 6 | (RefSeq) WD40 domain-containing protin (A)
GLYMA_02G226900	6299	1.86	4.21667	155	303	1.08623	up	0.000119082	0.00123357	At1g07200	K03695 ATP-dependent Clp protease ATP-binding subunit ClpB | (RefSeq) chaperone protein ClpB1 isoform X1 (A)
GLYMA_02G228200	2488	103.733	273.273	3606.67	7950	1.28902	up	1.30673e-08	3.05675e-07	At2g30020	K17506 protein phosphatase 1L [EC:3.1.3.16] | (RefSeq) probable protein phosphatase 2C 25 (A)
GLYMA_02G232000	3116	0.92	2.23667	58.6667	118.333	1.16531	up	0.000802284	0.00647484	At5g58430	K07195 exocyst complex component 7 | (RefSeq) exocyst complex component EXO70B1 (A)
GLYMA_02G232500	815	3.56333	1.13	60	15.6667	-1.78578	down	9.783e-05	0.00103848	At1g06980	--
GLYMA_02G234000	3783	16.8533	6.98333	517.667	185.333	-1.37327	down	4.80319e-09	1.1892e-07	At5g05340	K00430 peroxidase [EC:1.11.1.7] | (RefSeq) peroxidase P7 (A)
GLYMA_02G234200	4559	9.82	4.95667	304	129.667	-1.09946	down	4.71807e-05	0.000549961	At5g58390	K00430 peroxidase [EC:1.11.1.7] | (RefSeq) peroxidase 4 (A)
GLYMA_02G234600	1488	8.53	2.38	235.333	55	-1.95985	down	1.31691e-12	5.05282e-11	At2g40470	K13944 LOB domain-containing protein 16 | (RefSeq) LOB domain-containing protein 16 (A)
GLYMA_02G235400	2507	2.36	6.43	92.3333	222.667	1.36039	up	2.08236e-05	0.000263091	At2g45260	--
GLYMA_02G236300	3001	2.96667	1.35333	62.6667	23.3333	-1.26951	down	0.0044961	0.0269358	At2g23460	--
GLYMA_02G239100	1102	4.16	11.57	94.3333	216.333	1.34738	up	4.34062e-07	7.83685e-06	At5g36970	--
GLYMA_02G240000	7474	33.6167	13.7767	1825.67	618.667	-1.40535	down	1.33982e-08	3.12777e-07	At1g65840	K17839 polyamine oxidase [EC:1.5.3.17 1.5.3.-] | (RefSeq) polyamine oxidase 5 (A)
GLYMA_02G243400	9615	31.4167	5.64333	2145.67	326.667	-2.58344	down	5.68191e-26	6.75145e-24	At3g02850	K21867 potassium channel | (RefSeq) potassium channel SKOR isoform X1 (A)
GLYMA_02G244500	3168	12.61	4.40333	272.667	81.3333	-1.62543	down	2.37919e-12	8.85174e-11	At5g37680	K07955 ADP-ribosylation factor-like protein 8 | (RefSeq) uncharacterized protein LOC100305570 (A)
GLYMA_02G246000	3206	0.5	1.41	27	64.6667	1.39324	up	0.000134479	0.00137645	At5g37790	K13430 serine/threonine-protein kinase PBS1 [EC:2.7.11.1] | (RefSeq) serine/threonine-protein kinase PBS1 isoform X2 (A)
GLYMA_02G247000	3160	130.93	21.49	3102	421	-2.72593	down	2.58922e-37	6.74039e-35	At1g66480	--
GLYMA_02G247600	5413	54.5267	20.9933	3115.67	1007.67	-1.48845	down	2.70839e-20	2.15292e-18	At1g07570	K13430 serine/threonine-protein kinase PBS1 [EC:2.7.11.1] | (RefSeq) serine/threonine protein kinase (A)
GLYMA_02G251900	4377	23.6333	10.39	1434	544	-1.28659	down	1.88179e-11	6.31062e-10	At3g55640	K14684 solute carrier family 25 (mitochondrial phosphate transporter), member 23/24/25/41 | (RefSeq) mitochondrial substrate carrier family protein B isoform X1 (A)
GLYMA_02G252900	3563	2.50333	1.23	90.6667	37.6667	-1.13495	down	0.000557432	0.00474169	At5g05840	--
GLYMA_02G254400	4771	16.28	4.97	1484.67	387.333	-1.81698	down	5.87326e-19	4.19309e-17	At2g39950	--
GLYMA_02G254600	2042	30.16	5	1224	174	-2.69937	down	7.60275e-30	1.20313e-27	At2g39980	K19747 BAHD acyltransferase [EC:2.3.1.-] | (RefSeq) BAHD acyltransferase DCR (A)
GLYMA_02G257300	2907	0.786667	1.87667	46	91.6667	1.14372	up	0.00183255	0.0130614	At3g55950	K13430 serine/threonine-protein kinase PBS1 [EC:2.7.11.1] | (RefSeq) probable serine/threonine-protein kinase PBL7 (A)
GLYMA_02G259600	2498	4.56	2.12333	94.6667	36.3333	-1.23036	down	0.000395362	0.00353101	--	--
GLYMA_02G259700	1311	53.63	0.563333	960	8.66667	-6.67215	down	9.05366e-75	1.48049e-71	At3g05550	--
GLYMA_02G260500	3030	31.69	13.3633	1934.33	685.333	-1.35667	down	2.77122e-15	1.42035e-13	At5g05350	--
GLYMA_02G260600	2701	80.1433	34.33	2461.33	881	-1.33827	down	1.74118e-13	7.4e-12	At2g40410	--
GLYMA_02G260800	819	1039.18	338.857	15761.3	4199.33	-1.74386	down	1.00549e-12	3.90152e-11	At2g41430	--
GLYMA_02G261900	1167	72.0767	9.6	1719.67	189	-3.02873	down	3.30362e-38	9.22327e-36	At2g38310	K14496 abscisic acid receptor PYR/PYL family | (RefSeq) abscisic acid receptor PYL4 (A)
GLYMA_02G264200	2339	1.40667	0.61	61.3333	21.6667	-1.33769	down	0.0022001	0.0151954	At5g01830	K08332 vacuolar protein 8 | (RefSeq) U-box domain-containing protein 15-like (A)
GLYMA_02G264600	1323	0.993333	0.19	27	4.33333	-2.47775	down	0.000426831	0.00377573	At2g40230	K15400 omega-hydroxypalmitate O-feruloyl transferase [EC:2.3.1.188] | (RefSeq) omega-hydroxypalmitate O-feruloyl transferase (A)
GLYMA_02G264800	522	34.7033	11.3833	375.333	101.333	-1.73362	down	6.28958e-08	1.32587e-06	At3g11110	K19040 E3 ubiquitin-protein ligase ATL10/75/76/77/78 [EC:2.3.2.27] | (RefSeq) RING-H2 finger protein (A)
GLYMA_02G265900	849	60.24	18.97	1043	272.667	-1.78481	down	6.31532e-18	4.10735e-16	At2g44310	--
GLYMA_02G267800	10412	10.52	3.63333	804.667	235	-1.64016	down	1.90791e-17	1.18691e-15	At2g32950_2	K10143 E3 ubiquitin-protein ligase RFWD2 [EC:2.3.2.27] | (RefSeq) E3 ubiquitin-protein ligase COP1 (A)
GLYMA_02G271300	7299	67.3067	20.7733	4817.67	1262	-1.80651	down	1.24901e-16	7.1844e-15	At3g21620	K21989 calcium permeable stress-gated cation channel | (RefSeq) CSC1-like protein At3g21620 (A)
GLYMA_02G280900	204	9.78	26.0533	39	90	1.32143	up	0.000697586	0.00571448	--	--
GLYMA_02G283400	3009	0.573333	0.0466667	17.3333	1.33333	-3.63808	down	0.000497495	0.00430652	At5g17230	K02291 15-cis-phytoene synthase [EC:2.5.1.32] | (RefSeq) phytoene synthase 2, chloroplastic (A)
GLYMA_02G284100	7602	9.35	28.23	912.333	2354.33	1.49146	up	8.1318e-12	2.81782e-10	At5g17680	K13457 disease resistance protein RPM1 | (RefSeq) LOW QUALITY PROTEIN: disease resistance protein RPM1 (A)
GLYMA_02G284800	2277	5.98	15.7367	271.667	604	1.2932	up	4.69327e-06	6.91111e-05	At3g59080	K22683 aspartyl protease family protein [EC:3.4.23.-] | (RefSeq) aspartyl protease family protein 2 (A)
GLYMA_02G290000	2722	5.65	2.79333	203	86.6667	-1.11646	down	2.23748e-05	0.000280728	At5g36110	K20667 beta-amyrin 28-monooxygenase [EC:1.14.14.126] | (RefSeq) beta-amyrin 28-monooxygenase (A)
GLYMA_02G290600	3652	5.75333	3.09	259	117.667	-1.00918	down	5.08104e-06	7.4059e-05	At3g20490	--
GLYMA_02G290900	564	26.4467	11.2267	312.667	107.667	-1.3677	down	2.97108e-05	0.000363733	--	--
GLYMA_02G291200	2453	1.33333	0.02	27	0.333333	-6.08667	down	5.15905e-06	7.50367e-05	At5g66070	K19041 E3 ubiquitin-protein ligase RNF38/44 [EC:2.3.2.27] | (RefSeq) RING finger and U-box domain-containing protein (A)
GLYMA_02G294000	2503	59.19	18.0233	2177.67	559.667	-1.82143	down	7.99439e-18	5.15061e-16	At5g55180	K19891 glucan endo-1,3-beta-glucosidase 1/2/3 [EC:3.2.1.39] | (RefSeq) glucan endo-1,3-beta-glucosidase 3 isoform X1 (A)
GLYMA_02G296600	3391	60.48	151.567	4027.33	8668.67	1.22746	up	1.44005e-05	0.000188221	At2g40140	K23047 E3 ubiquitin-protein ligase UNKL [EC:2.3.2.27] | (RefSeq) zinc finger CCCH domain-containing protein 2 (A)
GLYMA_02G297000	4058	25.7167	12.9333	1526.67	645	-1.10361	down	1.23041e-11	4.2168e-10	At4g26650	K14411 RNA-binding protein Musashi | (RefSeq) heterogeneous nuclear ribonucleoprotein 1 isoform X2 (A)
GLYMA_02G302400	3152	2.20667	0.713333	84	22	-1.76658	down	2.7066e-05	0.000333135	At4g26580	K16283 E3 ubiquitin-protein ligase SDIR1 [EC:2.3.2.27] | (RefSeq) uncharacterized protein LOC100805406 (A)
GLYMA_02G306200	3583	5.19333	11.27	364.667	685	1.01916	up	0.000106294	0.00111693	At5g48150	K14494 DELLA protein | (RefSeq) DELLA protein 1 (A)
GLYMA_03G001600	3400	0.406667	2.31667	23	113.667	2.4097	up	1.12597e-07	2.27848e-06	At2g38600	K12742 isoprene synthase [EC:4.2.3.27] | (RefSeq) TPS9; tricyclene synthase EBOS, chloroplastic (A)
GLYMA_03G002300	1152	4.11333	0.993333	83	16	-2.19519	down	4.87996e-05	0.000567016	At1g66550	--
GLYMA_03G007400	1132	6.99	1.66667	124.667	24.6667	-2.1902	down	8.15974e-10	2.25246e-08	--	--
GLYMA_03G007700	1855	3.99667	9.41	93.3333	190.667	1.13947	up	7.23474e-05	0.000800648	At4g26010	K00430 peroxidase [EC:1.11.1.7] | (RefSeq) peroxidase 44 (A)
GLYMA_03G009600	1644	13.08	5.45	335.333	113	-1.3933	down	0.000844937	0.00676659	At4g23340	K04125 gibberellin 2beta-dioxygenase [EC:1.14.11.13] | (RefSeq) gibberellin 2-beta-dioxygenase 8 isoform X2 (A)
GLYMA_03G009800	9139	1.21	0.446667	39.3333	12.3333	-1.54598	down	0.000984643	0.00773745	At4g00520	K01068 acyl-coenzyme A thioesterase 1/2/4 [EC:3.1.2.2] | (RefSeq) acyl-CoA thioesterase 2 isoform X1 (A)
GLYMA_03G012800	7474	0.36	1.09333	22.3333	61.6667	1.53262	up	0.0025042	0.0168996	At5g23850	--
GLYMA_03G013400	4531	26.9867	12.3033	583.333	216.667	-1.26009	down	3.4674e-06	5.24078e-05	At2g45820	--
GLYMA_03G015900	558	4.55667	1.87	51	17.6667	-1.39953	down	0.00112497	0.00866173	At2g45760	--
GLYMA_03G016100	995	0.843333	3.74667	17.3333	62.6667	2.01494	up	2.32693e-06	3.65539e-05	At2g45760	--
GLYMA_03G016300	978	3.94	24.7167	80	407	2.51788	up	4.84782e-18	3.17699e-16	At2g45760	--
GLYMA_03G016400	1094	11.22	62.54	251.333	1152.33	2.35842	up	1.68753e-21	1.48589e-19	--	--
GLYMA_03G018900	5753	7.45333	3.73	332.333	144.667	-1.10324	down	0.000285477	0.00266321	At2g42010	K01115 phospholipase D1/2 [EC:3.1.4.4] | (RefSeq) phospholipase D gamma 1 (A)
GLYMA_03G019000	2987	0.5	1.49333	29	75.6667	1.48523	up	5.44959e-05	0.000624421	At1g01900	--
GLYMA_03G021200	2325	3.62	14.2033	134.333	434.667	1.84851	up	1.18822e-08	2.79475e-07	At2g45550	K22983 cytochrome P450 family 76 subfamily A | (RefSeq) cytochrome P450 76A2 (A)
GLYMA_03G021300	1665	25.2967	11.5733	856.667	327.333	-1.24474	down	5.22408e-08	1.11564e-06	At1g55230	--
GLYMA_03G022800	645	36.6933	4.96	504.667	54.3333	-3.01988	down	6.21934e-14	2.77366e-12	At1g24620	K13448 calcium-binding protein CML | (RefSeq) probable calcium-binding protein CML25 (A)
GLYMA_03G023900	3523	26.3833	10.0767	676.333	212.667	-1.51473	down	2.08318e-09	5.42354e-08	At3g60810	--
GLYMA_03G026600	1688	7.96667	2.32333	217.667	51.6667	-1.90462	down	2.64439e-05	0.000326649	At2g45360	--
GLYMA_03G028600	865	1.31	0.38	23	5.66667	-1.89076	down	0.00441998	0.0265771	At4g00080	--
GLYMA_03G029900	2551	2.87	7.31667	115.333	238.333	1.21884	up	0.000107616	0.0011284	At3g26320	K20617 cytochrome P450 family 71 subfamily A | (RefSeq) CYP71A9; cytochrome P450 71A9 precursor (A)
GLYMA_03G035300	4154	0.626667	2.04333	29	79.6667	1.60056	up	4.06921e-05	0.000481353	At3g08760	K13430 serine/threonine-protein kinase PBS1 [EC:2.7.11.1] | (RefSeq) serine/threonine-protein kinase (A)
GLYMA_03G036700	2856	59.7767	23.88	3378.67	1152.33	-1.4274	down	3.7591e-13	1.54042e-11	At5g01830	--
GLYMA_03G037300	7150	0.32	0.883333	46	107.333	1.35802	up	1.5146e-05	0.000197012	At3g14470	K19613 leucine-rich repeat protein SHOC2 | (RefSeq) putative disease resistance protein RGA4 (A)
GLYMA_03G040900	1691	3.85333	9.53667	82.3333	163.333	1.16763	up	0.00112142	0.00864218	At5g01750	--
GLYMA_03G041300	441	3.12667	0.99	27	7.33333	-1.75407	down	0.00411189	0.025116	At5g01740	--
GLYMA_03G042700	3624	2.27333	64.76	120.333	2813.33	4.70776	up	4.02928e-37	1.03258e-34	At2g38470	K13424 WRKY transcription factor 33 | (RefSeq) probable WRKY transcription factor 33 (A)
GLYMA_03G045400	2820	27.4633	64.09	1555	3049.67	1.11292	up	1.75925e-10	5.226e-09	At5g01710	--
GLYMA_03G045600	567	83.08	40.6	890.333	356	-1.15943	down	4.19481e-05	0.000495016	At3g13650	K25075 pterocarpan synthase [EC:4.2.1.139] | (RefSeq) PTS3; pterocarpan synthase precursor (A)
GLYMA_03G047900	11989	6.2	3.33	402.667	187.333	-1.00316	down	0.000150594	0.0015219	At5g41750	K13457 disease resistance protein RPM1 | (RefSeq) disease resistance protein RPM1 isoform X2 (A)
GLYMA_03G050100	3478	4.03	2.05333	95	41	-1.08282	down	0.00101257	0.00791347	At5g01600	K00522 ferritin heavy chain [EC:1.16.3.2] | (RefSeq) ferritin-2, chloroplastic (A)
GLYMA_03G052400	3372	3.71	9.15	247	520.667	1.20567	up	3.87673e-06	5.79569e-05	At1g47890	--
GLYMA_03G055100	4585	6.71	0.136667	298	5.33333	-5.71555	down	1.69125e-29	2.59275e-27	At5g01320	K01568 pyruvate decarboxylase [EC:4.1.1.1] | (RefSeq) pyruvate decarboxylase 2 (A)
GLYMA_03G056700	3529	28.31	14.9	1380	609.333	-1.03607	down	3.2617e-05	0.000395226	At5g05580	K10257 acyl-lipid omega-3 desaturase [EC:1.14.19.25 1.14.19.35 1.14.19.36] | (RefSeq) FAD8.2; omega-3 fatty acid desaturase, chloroplastic (A)
GLYMA_03G056900	12639	0.923333	0.246667	234.667	50.3333	-2.0294	down	1.72204e-07	3.36376e-06	At2g38250	--
GLYMA_03G057100	4229	13.1033	3.01667	390	75.3333	-2.23392	down	2.441e-19	1.82623e-17	At5g05600	K05277 anthocyanidin synthase [EC:1.14.20.4] | (RefSeq) ANS3; leucoanthocyanidin dioxygenase (A)
GLYMA_03G063400	2207	3.78333	9.42	167	351.667	1.20771	up	1.21601e-07	2.44178e-06	At4g31980_2	--
GLYMA_03G063600	8724	7.49	17.5133	434	888.667	1.13252	up	7.37787e-05	0.000814387	At2g38120	K13946 auxin influx carrier (AUX1 LAX family) | (RefSeq) LAX3; auxin transporter-like protein 3 (A)
GLYMA_03G068600	2882	1.59667	6.82667	89.6667	332	2.00371	up	5.95675e-16	3.21627e-14	At3g55550	K13416 brassinosteroid insensitive 1-associated receptor kinase 1 [EC:2.7.10.1 2.7.11.1] | (RefSeq) BRASSINOSTEROID INSENSITIVE 1-associated receptor kinase 1 isoform X1 (A)
GLYMA_03G069000	704	16.4167	6.44	82.3333	28	-1.44277	down	9.97221e-05	0.00105563	At5g63490	--
GLYMA_03G069100	5451	9.35333	4.8	191.333	83	-1.06676	down	0.000136637	0.00139563	At1g50590	K06911 quercetin 2,3-dioxygenase [EC:1.13.11.24] | (RefSeq) uncharacterized protein LOC102668539 isoform X2 (A)
GLYMA_03G069300	2431	6.69667	17.5267	291.333	636.333	1.2714	up	1.78868e-11	6.02188e-10	At3g55550	K13416 brassinosteroid insensitive 1-associated receptor kinase 1 [EC:2.7.10.1 2.7.11.1] | (RefSeq) BRASSINOSTEROID INSENSITIVE 1-associated receptor kinase 1 isoform X1 (A)
GLYMA_03G073400	2950	0.713333	1.93667	20	47	1.35936	up	0.00649961	0.0362511	At5g02020	--
GLYMA_03G076100	4808	52.88	17.3033	1793.67	491.333	-1.72806	down	1.03989e-18	7.19956e-17	At3g54110	K15103 solute carrier family 25 (mitochondrial uncoupling protein), member 8/9 | (RefSeq) uncharacterized protein LOC100809667 (A)
GLYMA_03G079200	2305	16	2.98667	759	116.333	-2.54172	down	1.23431e-23	1.25403e-21	At3g25030	--
GLYMA_03G081600	3911	5.67	3.04667	334.667	152.667	-1.00327	down	1.57957e-06	2.56345e-05	At4g13630	--
GLYMA_03G085900	4921	5.03	2.44	185.333	75.3333	-1.15428	down	1.31792e-05	0.000173799	At3g07310	--
GLYMA_03G088800	3169	9.34667	25.0667	315.667	697	1.30229	up	5.33509e-07	9.40488e-06	At3g25250	K20714 serine/threonine-protein kinase OXI1 [EC:2.7.11.1] | (RefSeq) serine/threonine-protein kinase OXI1 (A)
GLYMA_03G096500	2889	0.0766667	1.99333	2.66667	57.3333	4.54233	up	3.47602e-07	6.39007e-06	At1g55290	K06892 feruloyl-CoA 6-hydroxylase [EC:1.14.11.61] | (RefSeq) feruloyl CoA ortho-hydroxylase F6H1-3 (A)
GLYMA_03G098600	2749	10.58	4.01	290	88.6667	-1.53322	down	8.58424e-06	0.000118055	At5g16970	K00344 NADPH:quinone reductase [EC:1.6.5.5] | (RefSeq) quinone oxidoreductase 1 (A)
GLYMA_03G099900	5432	20.46	8.08	1910.67	649	-1.44127	down	4.38751e-12	1.57109e-10	At5g17640	--
GLYMA_03G102700	6896	29.1033	14.4133	1931.67	806.333	-1.12945	down	6.21252e-10	1.73728e-08	At3g60180	K13800 UMP-CMP kinase [EC:2.7.4.14] | (RefSeq) UMP-CMP kinase family protein (A)
GLYMA_03G103000	417	19.18	3.67667	169.333	26	-2.51882	down	6.23232e-10	1.7414e-08	At2g44600	--
GLYMA_03G106000	1272	0.27	3.72333	7.33333	79.6667	3.61234	up	2.05468e-12	7.66933e-11	At3g50310	K20716 mitogen-activated protein kinase kinase kinase 17/18 | (RefSeq) mitogen-activated protein kinase kinase kinase 18 (A)
GLYMA_03G107900	1344	49.8267	26.5667	892	393	-1.02568	down	2.35636e-06	3.69655e-05	--	--
GLYMA_03G108000	17395	7.55	1.07667	241.667	27.6667	-2.93718	down	2.99792e-12	1.0952e-10	--	--
GLYMA_03G112700	1183	1.94667	5.86667	46	118	1.47961	up	2.64545e-06	4.10876e-05	At2g44840	K09286 EREBP-like factor | (RefSeq) DNA-binding domain-containing protein (A)
GLYMA_03G112800	688	8.22333	23.26	116.333	271	1.37349	up	3.25983e-07	6.04442e-06	At2g44840	K09286 EREBP-like factor | (RefSeq) ethylene-responsive transcription factor 13 (A)
GLYMA_03G114700	4045	10.7333	5.13333	902	354	-1.18822	down	0.000207475	0.00202061	At4g31980_2	--
GLYMA_03G114800	2193	2.42333	0.99	105.667	37	-1.39831	down	8.17567e-05	0.000891128	At2g28580	--
GLYMA_03G115100	4279	0.736667	2.28667	47	125.667	1.53868	up	6.68734e-06	9.44257e-05	At2g44930	--
GLYMA_03G115300	2895	43.2967	13.28	1746	466.333	-1.80506	down	5.48769e-15	2.74705e-13	At1g11680	K05917 sterol 14alpha-demethylase [EC:1.14.14.154 1.14.15.36] | (RefSeq) obtusifoliol 14-alpha demethylase (A)
GLYMA_03G116200	1611	5.03333	2.25	159.667	62	-1.25999	down	0.00280592	0.0184979	At4g01070	K08237 hydroquinone glucosyltransferase [EC:2.4.1.218] | (RefSeq) hydroquinone glucosyltransferase (A)
GLYMA_03G117800	1374	7.17	1.02	138.333	16.3333	-2.93957	down	5.71404e-14	2.56162e-12	At3g60520	--
GLYMA_03G119500	3153	1.66	3.74	57	106	1.04604	up	0.00299105	0.0194558	At3g56940	K04035 magnesium-protoporphyrin IX monomethyl ester (oxidative) cyclase [EC:1.14.13.81] | (RefSeq) magnesium-protoporphyrin IX monomethyl ester [oxidative] cyclase, chloroplastic (A)
GLYMA_03G122000	4661	46.1667	19.24	1739	616.667	-1.37444	down	5.36071e-10	1.50658e-08	At2g40890	K09754 5-O-(4-coumaroyl)-D-quinate 3'-monooxygenase [EC:1.14.14.96] | (RefSeq) cytochrome P450 98A2 (A)
GLYMA_03G122500	5078	1	3.61	40.3333	126.667	1.76712	up	3.36469e-08	7.42567e-07	At1g68570	K14638 solute carrier family 15 (peptide/histidine transporter), member 3/4 | (RefSeq) protein NRT1/ PTR FAMILY 3.1 (A)
GLYMA_03G122900	8976	1.27	3.97333	56.3333	155.333	1.56028	up	1.05275e-05	0.000142161	At1g68570	K14638 solute carrier family 15 (peptide/histidine transporter), member 3/4 | (RefSeq) protein NRT1/ PTR FAMILY 3.1 (A)
GLYMA_03G123000	6790	1.24667	3.35333	111.333	244.333	1.2901	up	5.96898e-05	0.000676755	At1g68570	K14638 solute carrier family 15 (peptide/histidine transporter), member 3/4 | (RefSeq) protein NRT1/ PTR FAMILY 3.1 (A)
GLYMA_03G127800	946	5.15	2.21667	97.6667	35.6667	-1.32252	down	0.000152778	0.00154079	At2g41180	--
GLYMA_03G130700	841	4.43667	1	76	14.3333	-2.26497	down	2.6591e-08	5.9643e-07	--	--
GLYMA_03G130900	3898	31.2033	15.49	2120.67	898	-1.11529	down	2.55295e-07	4.82488e-06	At5g04040	K14674 TAG lipase / steryl ester hydrolase / phospholipase A2 / LPA acyltransferase [EC:3.1.1.3 3.1.1.13 3.1.1.4 2.3.1.51] | (RefSeq) SDP1-4; triacylglycerol lipase SDP1 (A)
GLYMA_03G131100	3015	0.99	2.15333	48.3333	91	1.02202	up	0.00240034	0.0163514	At4g33030	K06118 UDP-sulfoquinovose synthase [EC:3.13.1.1] | (RefSeq) UDP-sulfoquinovose synthase, chloroplastic (A)
GLYMA_03G132900	2781	2.30667	8.5	62.6667	185.667	1.74784	up	5.73624e-05	0.000652692	At3g57270	K19893 glucan endo-1,3-beta-glucosidase 5/6 [EC:3.2.1.39] | (RefSeq) glucan endo-1,3-beta-glucosidase 5 (A)
GLYMA_03G133800	3596	7.5	3.51667	182.667	71	-1.21244	down	6.07826e-06	8.6573e-05	At2g41540	K00006 glycerol-3-phosphate dehydrogenase (NAD+) [EC:1.1.1.8] | (RefSeq) glycerol-3-phosphate dehydrogenase [NAD(+)] GPDHC1, cytosolic (A)
GLYMA_03G134500	1428	28.8833	5.81	816	140.333	-2.42127	down	1.37558e-29	2.14715e-27	At2g36780	K13495 cis-zeatin O-glucosyltransferase [EC:2.4.1.215] | (RefSeq) zeatin O-glucosyltransferase (A)
GLYMA_03G138000	4486	55.5633	162.833	2891	7083	1.43854	up	3.40812e-17	2.0641e-15	At3g57530	K13412 calcium-dependent protein kinase [EC:2.7.11.1] | (RefSeq) calcium-dependent protein kinase 32 (A)
GLYMA_03G138600	3195	1.74	5.13667	110.333	277.667	1.45912	up	8.46705e-10	2.33166e-08	At2g41900	K23047 E3 ubiquitin-protein ligase UNKL [EC:2.3.2.27] | (RefSeq) zinc finger CCCH domain-containing protein 2 (A)
GLYMA_03G141700	3748	26.7867	8.57	1406.33	385.667	-1.74669	down	5.89184e-12	2.06666e-10	At2g42280	--
GLYMA_03G143800	1314	0.886667	2.28667	22.6667	51	1.27652	up	0.00145037	0.0107132	At3g57950	--
GLYMA_03G145800	2193	1.55667	4.06	46.3333	103.333	1.28518	up	8.17689e-05	0.000891128	At5g06710	K09338 homeobox-leucine zipper protein | (RefSeq) homeobox-leucine zipper protein HOX11 (A)
GLYMA_03G149400	3522	29.8833	10.8367	1351.67	417	-1.57044	down	4.75849e-18	3.12441e-16	At5g13320	K14487 auxin responsive GH3 gene family | (RefSeq) probable indole-3-acetic acid-amido synthetase GH3.6 (A)
GLYMA_03G150500	922	4.00667	1.14333	75	18	-1.92706	down	3.03017e-06	4.64743e-05	--	--
GLYMA_03G154200	1587	39.4067	243.647	1112	5710	2.51141	up	2.28377e-30	3.8256e-28	At3g63200	--
GLYMA_03G155300	3743	3.77	1.86	187.333	75.3333	-1.15292	down	0.000188194	0.00185572	At5g28150	--
GLYMA_03G155800	2414	2.24333	5.10667	95.6667	188	1.08945	up	1.78628e-05	0.000229225	At3g63210	--
GLYMA_03G156600	7888	5.70333	2.2	793.333	262	-1.47372	down	1.7329e-10	5.16114e-09	At1g03080	--
GLYMA_03G156800	8120	2.60333	5.71333	193.667	363	1.02895	up	1.56473e-05	0.000202612	At3g04810	K08857 NIMA (never in mitosis gene a)-related kinase 1/4/5 [EC:2.7.11.1] | (RefSeq) serine/threonine-protein kinase Nek4 isoform X1 (A)
GLYMA_03G159000	5104	1.47	3.59	92.3333	192.333	1.18442	up	0.000275375	0.00258512	At2g30550	K16818 phospholipase A1 [EC:3.1.1.32] | (RefSeq) phospholipase A(1) DAD1, chloroplastic (A)
GLYMA_03G159800	519	7.8	2.64	83.3333	23	-1.68657	down	7.70764e-05	0.000845894	At1g50640	K09286 EREBP-like factor | (RefSeq) ethylene-responsive transcription factor 12 (A)
GLYMA_03G160400	760	4.02667	19.5133	61	250	2.17078	up	9.25007e-15	4.52489e-13	--	--
GLYMA_03G162800	3360	33.94	14.89	2291.67	848.667	-1.29603	down	5.72908e-09	1.40326e-07	At2g38940	K08176 MFS transporter, PHS family, inorganic phosphate transporter | (RefSeq) PHT1-2; inorganic phosphate transporter 1-2 (A)
GLYMA_03G163100	1975	18.2733	5.34	429.667	103.333	-1.90376	down	7.52472e-10	2.08218e-08	At2g31180	K09422 transcription factor MYB, plant | (RefSeq) transcription factor MYB14 (A)
GLYMA_03G168000	8059	19.0633	7.65333	1841	640.333	-1.4157	down	5.60321e-08	1.19068e-06	At1g15520	K05681 ATP-binding cassette, subfamily G (WHITE), member 2 | (RefSeq) ABC transporter G family member 22 isoform X2 (A)
GLYMA_03G168100	9988	0.51	0.13	38	8	-2.08793	down	0.000502728	0.00434635	At1g15520	K05681 ATP-binding cassette, subfamily G (WHITE), member 2 | (RefSeq) ABC transporter G family member 21 (A)
GLYMA_03G171500	5065	3.66	0.743333	225.333	39.6667	-2.39269	down	8.66541e-17	5.06072e-15	At3g53720	--
GLYMA_03G171600	5675	0.84	7.26	28.6667	214	3.01677	up	9.02582e-13	3.53015e-11	At3g53720	--
GLYMA_03G171700	2661	3.18667	19.7967	86.3333	448.333	2.52065	up	2.72758e-16	1.52798e-14	At3g53720	--
GLYMA_03G173000	6644	0.633333	1.41333	41	74	1.01355	up	0.00440676	0.0265209	At2g37440	K24221 type I inositol polyphosphate 5-phosphatase IP5P1/2 [EC:3.1.3.56] | (RefSeq) type I inositol polyphosphate 5-phosphatase 2 (A)
GLYMA_03G173900	5861	0.676667	1.64	67	141	1.1823	up	0.000489154	0.0042418	At3g53540	--
GLYMA_03G177300	3464	4.13333	1.38667	76.3333	21	-1.70605	down	9.48365e-06	0.000129131	At5g02840	K12133 MYB-related transcription factor LHY | (RefSeq) MYB114; MYB transcription factor MYB114 (A)
GLYMA_03G177500	3273	26.9633	2.73667	1173.67	103.667	-3.40002	down	1.29798e-43	5.24382e-41	At2g28550	K09284 AP2-like factor, euAP2 lineage | (RefSeq) APETALA2-like protein 3 (A)
GLYMA_03G179100	1931	0.693333	0.08	25	2.33333	-3.276	down	5.90618e-05	0.000670473	At2g42760	--
GLYMA_03G179300	3237	39.6833	20.08	2015	865.667	-1.09094	down	5.30114e-12	1.87478e-10	At2g37150	K19041 E3 ubiquitin-protein ligase RNF38/44 [EC:2.3.2.27] | (RefSeq) E3 ubiquitin-protein ligase MBR2 (A)
GLYMA_03G181100	1233	3.61667	1.73333	94	36	-1.18992	down	0.00897571	0.0465387	At5g60680	--
GLYMA_03G181400	6996	4.24	11.6533	423.667	1022	1.36809	up	3.22087e-06	4.90705e-05	At5g03280	K14513 ethylene-insensitive protein 2 | (RefSeq) ethylene-insensitive protein 2 (A)
GLYMA_03G181700	3936	1.71333	3.9	81	159.667	1.09499	up	0.000636108	0.00529936	At2g37040	K10775 phenylalanine ammonia-lyase [EC:4.3.1.24] | (RefSeq) PAL1.2; phenylalanine ammonia-lyase 1 (A)
GLYMA_03G184100	1250	1.96667	0.556667	22.3333	5.33333	-1.92922	down	0.00315904	0.0203301	At3g53220	K03671 thioredoxin 1 | (RefSeq) uncharacterized protein LOC100305694 (A)
GLYMA_03G189500	4079	34.52	11.89	1100.33	320.333	-1.64986	down	2.88176e-22	2.66808e-20	At3g53000	--
GLYMA_03G189600	2115	23.3567	0.683333	967.667	24.6667	-5.21997	down	1.66602e-09	4.38065e-08	At3g10040	--
GLYMA_03G192200	3798	0.526667	1.24333	28	58.3333	1.14904	up	0.00677559	0.037522	At2g36400	--
GLYMA_03G196000	3674	2.75	0.836667	203.667	52	-1.83227	down	3.37288e-12	1.21793e-10	At2g36240	--
GLYMA_03G196100	3390	3.65667	1.92667	91.6667	40.3333	-1.0393	down	0.00147789	0.0108768	At3g10130	--
GLYMA_03G198600	1008	4.18333	22.57	86.3333	383.667	2.30621	up	1.02335e-18	7.10209e-17	At2g27310	--
GLYMA_03G200000	1528	26.1767	14.0667	805.333	363.333	-1.00818	down	6.96128e-08	1.45762e-06	At5g22250	K12581 CCR4-NOT transcription complex subunit 7/8 | (RefSeq) probable CCR4-associated factor 1 homolog 11 (A)
GLYMA_03G200500	471	12.53	38.2433	114.667	304.333	1.51488	up	7.08248e-09	1.71276e-07	At3g52520	--
GLYMA_03G201200	624	48.9767	152.68	625.667	1604	1.5262	up	1.21662e-07	2.44178e-06	At2g35980	--
GLYMA_03G201500	1079	18.8367	76.66	400.667	1401	1.92589	up	4.04754e-10	1.15634e-08	At2g35980	--
GLYMA_03G201700	1353	18.9533	5.61	523.333	128.333	-1.87823	down	1.16081e-14	5.62232e-13	--	--
GLYMA_03G202300	4693	10.7333	4.10667	853.667	276	-1.48795	down	2.43043e-08	5.49085e-07	At2g35940	--
GLYMA_03G202400	2463	89.52	32.9933	4479.67	1374	-1.55898	down	2.44493e-14	1.14075e-12	At4g10800	--
GLYMA_03G204100	4351	8.46	28.8933	408.667	1159.33	1.65174	up	1.14697e-16	6.63078e-15	At2g38910	K13412 calcium-dependent protein kinase [EC:2.7.11.1] | (RefSeq) calcium-dependent protein kinase 26 (A)
GLYMA_03G204900	788	2.33333	21.5133	36	285.667	3.11111	up	1.44655e-20	1.17157e-18	--	K20725 MAP kinase substrate 1 | (RefSeq) protein MKS1 (A)
GLYMA_03G205600	2263	3.11333	1.50333	146.667	57.6667	-1.18417	down	0.000596643	0.00502428	At3g11890	--
GLYMA_03G208200	1869	5.17	13.37	127.333	270	1.24614	up	0.000618539	0.00518006	At1g05260	K00430 peroxidase [EC:1.11.1.7] | (RefSeq) peroxidase 3 (A)
GLYMA_03G208500	5343	35.0567	18.3733	1386.33	616	-1.04293	down	5.73562e-09	1.40386e-07	At4g03110	K13207 CUG-BP- and ETR3-like factor | (RefSeq) RNA-binding protein BRN1 (A)
GLYMA_03G209800	4984	2.43333	6.73	212.667	497.333	1.35963	up	4.5958e-13	1.85452e-11	At2g47890	--
GLYMA_03G210500	1125	1.48333	3.56667	32	68	1.18895	up	0.00686075	0.0378958	At3g62930	K03676 glutaredoxin 3 | (RefSeq) monothiol glutaredoxin-S6 (A)
GLYMA_03G212400	1851	2.60333	7.45667	78.3333	187.333	1.40094	up	9.55453e-07	1.60992e-05	At5g27690	K07213 copper chaperone | (RefSeq) copper transport protein ATX1 (A)
GLYMA_03G213400	1319	0.863333	0.24	23.3333	5.33333	-1.97067	down	0.00692924	0.0381453	At4g02500	K08238 xyloglucan 6-xylosyltransferase [EC:2.4.2.39] | (RefSeq) xyloglucan 6-xylosyltransferase 2 (A)
GLYMA_03G214100	4450	10.1833	1.98	554.333	90.6667	-2.47364	down	1.60143e-29	2.46607e-27	At1g02860	K16275 E3 ubiquitin-protein ligase BAH [EC:2.3.2.27] | (RefSeq) E3 ubiquitin-protein ligase BAH1 (A)
GLYMA_03G214300	1339	8.24333	1.85	212.667	42	-2.25264	down	1.43464e-10	4.32154e-09	At4g02440	--
GLYMA_03G215100	1144	1.74667	3.81333	39.3333	74	1.02777	up	0.0014779	0.0108768	At4g02360	--
GLYMA_03G215500	1095	17.07	4.64333	372.667	86.3333	-1.98283	down	1.89647e-14	8.95804e-13	At4g15970_2	K19038 E3 ubiquitin-protein ligase ATL41 [EC:2.3.2.27] | (RefSeq) RING-H2 finger protein ATL40 (A)
GLYMA_03G217300	3751	13.9167	33.7567	566.667	1134.67	1.15945	up	1.31442e-07	2.62274e-06	At5g26990	--
GLYMA_03G218900	927	3.88667	15.82	61	201.667	1.88477	up	1.59252e-08	3.67521e-07	--	--
GLYMA_03G219000	2302	46.2333	14.76	837.667	219	-1.76624	down	7.29281e-10	2.0229e-08	At5g38070	K10661 E3 ubiquitin-protein ligase MARCH6 [EC:2.3.2.27] | (RefSeq) probable E3 ubiquitin ligase SUD1 isoform X2 (A)
GLYMA_03G220800	2028	21.5333	6.19667	643.667	153.667	-1.91494	down	8.94622e-18	5.71028e-16	At2g47260	K18835 WRKY transcription factor 2 | (RefSeq) WRKY59; probable WRKY transcription factor 2 (A)
GLYMA_03G221400	6454	1.13	0.133333	69.6667	7	-3.19699	down	1.69165e-11	5.70641e-10	At2g47240	K01897 long-chain acyl-CoA synthetase [EC:6.2.1.3] | (RefSeq) long chain acyl-CoA synthetase 1 (A)
GLYMA_03G223000	2776	360.677	183.887	20048.7	8627	-1.08257	down	3.77359e-13	1.54268e-11	At4g01850	K00789 S-adenosylmethionine synthetase [EC:2.5.1.6] | (RefSeq) S-adenosylmethionine synthase 1 (A)
GLYMA_03G225800	7000	2.15667	5.69	159	359.333	1.29774	up	2.15772e-08	4.92333e-07	At2g46920	K01102 pyruvate dehydrogenase phosphatase [EC:3.1.3.43] | (RefSeq) probable protein phosphatase 2C 4 (A)
GLYMA_03G226200	10645	143.457	33.1533	16075	3264.67	-2.20722	down	1.09558e-14	5.31388e-13	At3g62010	--
GLYMA_03G231700	1959	37.2367	12.8067	916	258.667	-1.66434	down	1.36425e-12	5.22862e-11	At3g62550	--
GLYMA_03G233800	1399	2.47667	0.286667	58.3333	5.66667	-3.21871	down	1.84346e-09	4.82503e-08	At1g56250	--
GLYMA_03G234800	1679	39.8	89.2733	655.667	1193	1.03088	up	0.000372602	0.00335303	At1g56220	--
GLYMA_03G236300	6831	133.52	420.007	8454.33	22582.7	1.55002	up	7.421e-09	1.78959e-07	At1g09090	K13447 respiratory burst oxidase [EC:1.6.3.- 1.11.1.-] | (RefSeq) respiratory burst oxidase homolog protein B (A)
GLYMA_03G236900	7746	9.09	4.70333	476.333	207.667	-1.06011	down	7.49811e-08	1.56241e-06	At1g09020	--
GLYMA_03G241600	6095	8.01	3.11333	490	157	-1.48091	down	8.49688e-09	2.03475e-07	At3g05140	K13418 somatic embryogenesis receptor kinase 1 [EC:2.7.10.1 2.7.11.1] | (RefSeq) somatic embryogenesis receptor kinase 2 (A)
GLYMA_03G244900	315	6.03	1.94667	36	10.3333	-1.71569	down	0.00304672	0.019733	--	--
GLYMA_03G245200	2068	65.9967	22.61	2736.67	791.667	-1.65433	down	3.36481e-20	2.65626e-18	At5g28040	--
GLYMA_03G247100	4437	60.27	21.8333	2535.33	754.333	-1.5888	down	3.41862e-08	7.52052e-07	At5g28770	--
GLYMA_03G248800	5727	13.7733	4.4	1436.33	385.333	-1.75862	down	9.58402e-25	1.07204e-22	At1g08800	--
GLYMA_03G251400	1198	1.63667	4.51667	38.3333	85.3333	1.32582	up	0.00085487	0.00683021	At1g08650	K08794 calcium/calmodulin-dependent protein kinase I [EC:2.7.11.17] | (RefSeq) PPCK4; phosphoenolpyruvate-carboxylase kinase (A)
GLYMA_03G254400	746	2.35667	0.846667	33.3333	10.3333	-1.58106	down	0.00413877	0.0252533	At4g01200	--
GLYMA_03G254500	3527	6.60667	2.52333	459	151.333	-1.49256	down	1.55335e-10	4.6583e-09	At3g61590	--
GLYMA_03G254600	3834	0.29	1.06667	13	40.3333	1.75085	up	0.000190448	0.00187392	At5g41620	--
GLYMA_03G256400	2587	0.54	2.99667	8.66667	39.3333	2.33228	up	0.000109168	0.00114224	At4g01080	K23877 xyloglucan O-acetyltransferase | (RefSeq) protein ALTERED XYLOGLUCAN 4-like isoform X1 (A)
GLYMA_03G256700	4379	0.0533333	0.716667	3	40	3.80844	up	1.87575e-06	3.00716e-05	At4g23810	K13425 WRKY transcription factor 22 | (RefSeq) WRKY transcription factor 22 (A)
GLYMA_03G258100	2516	2.87	11.7967	144.333	502.333	1.92895	up	4.88942e-21	4.10567e-19	At1g01260	K13422 transcription factor MYC2 | (RefSeq) transcription factor MYC2 (A)
GLYMA_03G261400	1137	1.95333	0.886667	46.3333	17	-1.27612	down	0.00933264	0.0480828	At4g01410	--
GLYMA_03G262500	3198	16.76	7.10333	990.333	357.667	-1.34469	down	4.46186e-13	1.80471e-11	At1g72300	K13415 protein brassinosteroid insensitive 1 [EC:2.7.10.1 2.7.11.1] | (RefSeq) BRI1B; brassinosteroid receptor precursor (A)
GLYMA_03G263000	1689	1.52667	5.68	51.6667	161	1.78379	up	5.0702e-06	7.39324e-05	At1g53820	K19038 E3 ubiquitin-protein ligase ATL41 [EC:2.3.2.27] | (RefSeq) RING-H2 finger protein ATL40 (A)
GLYMA_03G263400	796	0.283333	2.17667	3.66667	25.3333	2.888	up	6.837e-05	0.000762777	At3g14280	--
GLYMA_03G263600	2937	1.88667	5.67	107	281.667	1.49883	up	3.20035e-07	5.93734e-06	At3g14240	--
GLYMA_03G264100	5308	1.98667	5.15667	80.6667	175.667	1.26639	up	0.000108298	0.00113521	At4g13420	K03549 KUP system potassium uptake protein | (RefSeq) HAK; uncharacterized protein LOC100786294 (A)
GLYMA_04G004500	3043	66.4	5.65667	3216.33	237.667	-3.65463	down	3.77437e-59	3.01423e-56	At4g34950	--
GLYMA_04G006200	6599	0.726667	0.353333	70.6667	29	-1.15446	down	0.00287756	0.018848	At4g38810	--
GLYMA_04G006900	934	2.56333	0.443333	49.3333	7	-2.6519	down	9.79858e-07	1.64943e-05	At4g38840	K14488 SAUR family protein | (RefSeq) auxin-responsive protein SAUR23 (A)
GLYMA_04G008900	1786	38.5567	99.71	1313.33	2833	1.25881	up	9.90612e-09	2.35091e-07	At5g66320	--
GLYMA_04G009400	1371	1137.12	415.227	25406.3	7591.33	-1.57568	down	3.8388e-09	9.61521e-08	At1g76180	--
GLYMA_04G012700	1299	156.087	67.7	3328.67	1184.33	-1.32731	down	2.3524e-09	6.0738e-08	At2g21660	K13195 cold-inducible RNA-binding protein | (RefSeq) glycine-rich RNA-binding protein GRP1A-like (A)
GLYMA_04G013400	917	81.8067	19.1267	1220.67	233	-2.22595	down	3.77218e-13	1.54268e-11	At1g49310	--
GLYMA_04G013500	1721	41.7067	21.07	1088.33	472.333	-1.08786	down	6.11142e-05	0.000690804	At1g49320	--
GLYMA_04G014000	2618	10.1533	2.92667	430.667	105.333	-1.91048	down	2.94078e-11	9.64531e-10	At3g18830	K08150 MFS transporter, SP family, solute carrier family 2 (myo-inositol transporter), member 13 | (RefSeq) inositol transporter 1 isoform X1 (A)
GLYMA_04G016000	4663	2.11667	0.806667	143.333	47.6667	-1.48427	down	1.30042e-06	2.1418e-05	At1g42540	K05387 glutamate receptor, ionotropic, plant | (RefSeq) glutamate receptor 3.3 (A)
GLYMA_04G016100	2455	17.1333	7.31667	338.333	123	-1.33611	down	6.26708e-10	1.74969e-08	At2g33700	K14803 protein phosphatase PTC2/3 [EC:3.1.3.16] | (RefSeq) probable protein phosphatase 2C 27 (A)
GLYMA_04G018800	1570	0.653333	1.99333	21	52.6667	1.47576	up	0.00148532	0.0109244	At1g76240	--
GLYMA_04G020700	1834	49.15	144.853	1868.67	4482.67	1.43477	up	6.47331e-09	1.57432e-07	At1g76070	--
GLYMA_04G022300	4147	20.0067	47.2167	1023.67	2036.67	1.12413	up	8.10966e-08	1.68168e-06	At1g20160	--
GLYMA_04G024800	3847	0.55	1.42667	20.3333	47	1.29553	up	0.0046644	0.0277408	At1g47870	K06620 transcription factor E2F3 | (RefSeq) transcription factor E2FC isoform X2 (A)
GLYMA_04G025100	3104	48.21	24.5967	1345.67	574	-1.08385	down	2.99043e-09	7.59551e-08	At5g06300	K22522 cytokinin riboside 5'-monophosphate phosphoribohydrolase [EC:3.2.2.-] | (RefSeq) probable cytokinin riboside 5'-monophosphate phosphoribohydrolase LOGL10 isoform X2 (A)
GLYMA_04G027000	1609	11.1933	35.9667	298	794.333	1.56462	up	2.72563e-14	1.25635e-12	At1g75540	--
GLYMA_04G028300	3316	2.55	6.77	88.6667	198	1.2979	up	5.33173e-07	9.40379e-06	At1g09850_1	K16290 xylem cysteine proteinase [EC:3.4.22.-] | (RefSeq) cysteine protease XCP2 (A)
GLYMA_04G029600	1257	0.813333	2.27333	20.6667	48.3333	1.36656	up	0.00100345	0.00785467	At4g34590	--
GLYMA_04G030100	2374	1.18	3.72333	22.6667	57.3333	1.52554	up	0.0028524	0.0187288	At1g19630	K12638 3-epi-6-deoxocathasterone 23-monooxygenase [EC:1.14.14.147] | (RefSeq) 3-epi-6-deoxocathasterone 23-monooxygenase CYP90D1 (A)
GLYMA_04G030900	5334	30.3867	6.19333	3127	520	-2.42037	down	2.88252e-22	2.66808e-20	At1g19530	K23050 phenylcoumaran benzylic ether reductase [EC:1.3.1.-] | (RefSeq) phenylcoumaran benzylic ether reductase Betv6 (A)
GLYMA_04G031700	728	2.38333	0.486667	27	4.66667	-2.39745	down	0.000199526	0.0019507	At2g21650	--
GLYMA_04G032000	2023	2.06	0.15	60	3.66667	-3.89737	down	2.82633e-11	9.28767e-10	At5g42760	--
GLYMA_04G032800	1259	24.19	12.9733	543	239.333	-1.02955	down	0.000568506	0.0048168	At5g65650	--
GLYMA_04G034200	7839	10.4067	5.15	780.667	329.667	-1.11522	down	7.98949e-06	0.000110852	At5g42620	K01404 leishmanolysin [EC:3.4.24.36] | (RefSeq) leishmanolysin-like peptidase (A)
GLYMA_04G034400	1222	4.13333	9.01667	71.3333	130.333	1.00814	up	9.40609e-05	0.00100406	At1g75000	--
GLYMA_04G035200	688	12.6067	3.30333	177	39	-2.05615	down	4.01046e-06	5.97999e-05	--	--
GLYMA_04G036700	633	24.21	122.607	314.333	1312	2.21408	up	1.43163e-21	1.26381e-19	At3g50060	K09422 transcription factor MYB, plant | (RefSeq) MYB178; MYB transcription factor MYB178 (A)
GLYMA_04G038100	1417	1.60667	7.32	45.3333	174.333	2.07942	up	8.18856e-11	2.56098e-09	At5g42750	K14499 BRI1 kinase inhibitor 1 | (RefSeq) BRI1 kinase inhibitor 1 (A)
GLYMA_04G041200	1981	148.827	9.03	5779.33	290.333	-4.15776	down	3.35133e-84	7.1928e-81	At5g67190	K09286 EREBP-like factor | (RefSeq) ethylene-responsive transcription factor RAP2-1 isoform X1 (A)
GLYMA_04G042000	2750	3.75333	8.66333	184.333	361.333	1.10235	up	4.04543e-08	8.81472e-07	At3g50070	K14505 cyclin D3, plant | (RefSeq) cyclin-D3-1 (A)
GLYMA_04G042400	2801	72.2867	13.77	4018.67	656.667	-2.49559	down	4.85058e-20	3.80295e-18	At5g24080	K13430 serine/threonine-protein kinase PBS1 [EC:2.7.11.1] | (RefSeq) probable serine/threonine-protein kinase PBL7 (A)
GLYMA_04G042500	2551	3.16333	0.57	159.333	25	-2.56562	down	2.48167e-10	7.24664e-09	At2g19130	K13415 protein brassinosteroid insensitive 1 [EC:2.7.10.1 2.7.11.1] | (RefSeq) BRI1B; brassinosteroid receptor precursor (A)
GLYMA_04G043100	684	7.63667	3.63	111	42.3333	-1.21629	down	0.008406	0.0441582	--	--
GLYMA_04G044600	2778	18.4367	44.9133	1035	2120.67	1.16926	up	3.40058e-09	8.57385e-08	At5g67360	--
GLYMA_04G044900	2291	60.2667	143.42	2743.67	5550.67	1.14458	up	4.25558e-07	7.70357e-06	At5g04340	--
GLYMA_04G045200	1471	0.336667	1.28333	11	31.6667	1.7454	up	0.00899076	0.0466097	At5g43190	--
GLYMA_04G045900	2106	2.11	0.783333	66.6667	20.3333	-1.56023	down	0.000192862	0.00189333	--	--
GLYMA_04G048600	3485	9.51333	4.69	288	120.667	-1.12841	down	1.75635e-06	2.82894e-05	At3g49720	K23871 putative pectin methylesterase [EC:2.1.1.-] | (RefSeq) probable pectin methylesterase CGR3 (A)
GLYMA_04G050700	4304	41.8367	4.49333	1296.33	116	-3.33636	down	9.20736e-56	6.72725e-53	At5g11790	K18266 protein NDRG1 | (RefSeq) uncharacterized protein LOC100803300 (A)
GLYMA_04G051000	2256	13.9533	0.703333	253	11.3333	-4.40709	down	8.22138e-19	5.76167e-17	At5g56840	--
GLYMA_04G054600	1802	1.72	0.273333	63	8.33333	-2.76676	down	4.27594e-08	9.28166e-07	At1g72820	K15121 solute carrier family 25, member 44 | (RefSeq) solute carrier family 25 member 44 (A)
GLYMA_04G055100	1640	0.363333	1.04333	12	29	1.39961	up	0.00703268	0.0385601	At1g54200	--
GLYMA_04G055300	716	4.26333	9.83333	62	119.333	1.08357	up	8.48763e-05	0.000917423	At2g06520	--
GLYMA_04G055600	4075	9.19333	0.97	398.667	36.6667	-3.33958	down	1.98684e-29	3.00565e-27	At2g41510	K00279 cytokinin dehydrogenase [EC:1.5.99.12] | (RefSeq) cytokinin dehydrogenase 7 isoform X1 (A)
GLYMA_04G056100	6805	5.47667	1.76	282	77.6667	-1.74403	down	2.09119e-12	7.79711e-11	At4g33520	K17686 P-type Cu+ transporter [EC:7.2.2.8] | (RefSeq) HMA8; chloroplast copper-translocating HMA8 P-ATPase (A)
GLYMA_04G056500	1113	0.606667	2.92	8	31	2.10521	up	0.00191004	0.0134988	At3g43850	--
GLYMA_04G056900	3406	1.75667	0.8	59.6667	22.6667	-1.24406	down	0.00454877	0.027185	At2g05940	K13430 serine/threonine-protein kinase PBS1 [EC:2.7.11.1] | (RefSeq) serine/threonine-protein kinase (A)
GLYMA_04G057700	861	2.11333	14.5833	36.3333	211.667	2.68034	up	2.10981e-21	1.82957e-19	At1g74930	K09286 EREBP-like factor | (RefSeq) ethylene-responsive transcription factor ERF023 (A)
GLYMA_04G058100	2126	3.06	1.24667	131.667	45.3333	-1.40133	down	4.54935e-05	0.000532282	At5g42830	K19747 BAHD acyltransferase [EC:2.3.1.-] | (RefSeq) BAHD acyltransferase DCR (A)
GLYMA_04G058200	2437	0.23	1.09333	11	45	2.15655	up	2.32367e-06	3.65194e-05	At4g33160	--
GLYMA_04G058400	5979	0.0566667	0.326667	4	21.3333	2.49102	up	0.0015285	0.0111987	At5g10720	K14489 arabidopsis histidine kinase 2/3/4 (cytokinin receptor) [EC:2.7.13.3] | (RefSeq) histidine kinase 4 isoform X2 (A)
GLYMA_04G061200	3042	19.1133	8.29	745	268	-1.32667	down	3.26304e-08	7.2199e-07	At4g31800_2	--
GLYMA_04G061500	2460	57.5667	8.74667	2014.33	258.667	-2.83022	down	2.07894e-66	2.3797e-63	At5g25110	K07198 5'-AMP-activated protein kinase, catalytic alpha subunit [EC:2.7.11.11] | (RefSeq) CBL-interacting protein kinase 2 (A)
GLYMA_04G062300	1908	112.247	59.1467	4386.67	1907	-1.04531	down	4.50188e-07	8.09396e-06	At1g80780	K12581 CCR4-NOT transcription complex subunit 7/8 | (RefSeq) probable CCR4-associated factor 1 homolog 7 (A)
GLYMA_04G062900	1333	11.79	1.22333	249.667	22.3333	-3.37035	down	1.215e-28	1.67562e-26	At5g25190	K09286 EREBP-like factor | (RefSeq) ethylene-responsive transcription factor 3 (A)
GLYMA_04G063200	1245	353.85	163.457	9027.33	3426	-1.23089	down	1.58364e-07	3.11468e-06	At2g25250	--
GLYMA_04G063700	3956	1.78667	0.966667	75	34	-1.00306	down	0.00349771	0.0220631	At5g05830	--
GLYMA_04G066600	3698	0.57	6.37667	32	290.333	3.35519	up	2.68154e-14	1.24103e-12	At2g25460	--
GLYMA_04G066900	3543	41.8633	16.67	2498	846	-1.43646	down	4.0135e-13	1.63492e-11	At5g25350	K14515 EIN3-binding F-box protein | (RefSeq) EIN3-binding F-box protein 1 (A)
GLYMA_04G069700	1106	7.59	3.93333	148.333	63.3333	-1.06865	down	0.000404795	0.00360396	--	--
GLYMA_04G069800	7770	0.5	1.46	44.6667	115.333	1.46669	up	8.97345e-05	0.000963264	At1g15520	K05681 ATP-binding cassette, subfamily G (WHITE), member 2 | (RefSeq) ABC transporter G family member 21 (A)
GLYMA_04G069900	3491	7.97	3.84333	304	125	-1.16101	down	3.1396e-07	5.84674e-06	At2g25620	K14803 protein phosphatase PTC2/3 [EC:3.1.3.16] | (RefSeq) probable protein phosphatase 2C 22 isoform X2 (A)
GLYMA_04G073100	3500	1.17	3.06	48.3333	112.667	1.31174	up	0.000662395	0.00547391	At1g60560	--
GLYMA_04G076000	1561	367.58	143.05	9919	3128.33	-1.49053	down	3.24183e-08	7.18222e-07	At5g24890	--
GLYMA_04G079200	1285	7.85	2.39333	174.667	45	-1.81677	down	6.33317e-06	8.98702e-05	At4g32690	--
GLYMA_04G079300	1358	5.97	0.916667	167	21.3333	-2.82223	down	3.06826e-10	8.85411e-09	--	--
GLYMA_04G079700	4556	2.74667	0.906667	162.333	46	-1.7064	down	7.75268e-08	1.6135e-06	At5g25620	K11816 indole-3-pyruvate monooxygenase [EC:1.14.13.168] | (RefSeq) indole-3-pyruvate monooxygenase YUCCA6 (A)
GLYMA_04G082700	3616	9.68667	4.61667	520	205.667	-1.19	down	2.94025e-08	6.56063e-07	At1g52190	K14638 solute carrier family 15 (peptide/histidine transporter), member 3/4 | (RefSeq) protein NRT1/ PTR FAMILY 1.2 (A)
GLYMA_04G082900	6254	182.28	83.5933	8429.33	3248	-1.23758	down	1.26548e-09	3.38447e-08	At4g28880	K08960 casein kinase 1, epsilon [EC:2.7.11.1] | (RefSeq) casein kinase 1-like protein 4 (A)
GLYMA_04G085600	398	6.29333	16.9633	50	114.333	1.31979	up	0.000183579	0.00181413	--	--
GLYMA_04G085800	962	2.56667	0.993333	51.3333	16.3333	-1.49566	down	0.00591574	0.0334885	At4g32860	--
GLYMA_04G086900	7988	12.9867	5.94333	543.333	214.667	-1.2288	down	5.70473e-09	1.39829e-07	At5g56630	K00850 6-phosphofructokinase 1 [EC:2.7.1.11] | (RefSeq) ATP-dependent 6-phosphofructokinase 6 (A)
GLYMA_04G090000	1494	20.2733	5.50333	410	92.3333	-2.00347	down	1.34118e-10	4.0578e-09	At5g65660	--
GLYMA_04G090100	2026	1.77667	0.203333	52	5.33333	-3.20477	down	4.17975e-07	7.57428e-06	At5g65640	K13422 transcription factor MYC2 | (RefSeq) transcription factor MYC1 (A)
GLYMA_04G091400	1011	1.12333	2.83	22	48.3333	1.24358	up	0.00308982	0.0199557	At5g05810	K19041 E3 ubiquitin-protein ligase RNF38/44 [EC:2.3.2.27] | (RefSeq) RING-H2 finger protein ATL43 (A)
GLYMA_04G091600	2251	3.96667	0.643333	177.333	24.6667	-2.72381	down	4.7208e-19	3.38439e-17	At5g49700	--
GLYMA_04G092100	1161	30.5767	72.42	714	1416.67	1.13426	up	5.81547e-07	1.01941e-05	At4g24570	K15104 solute carrier family 25 (mitochondrial oxoglutarate transporter), member 11 | (RefSeq) mitochondrial uncoupling protein 4 (A)
GLYMA_04G092400	5543	78.4233	35.6867	4306.33	1668.33	-1.24517	down	2.70911e-15	1.39059e-13	At4g24620	K01810 glucose-6-phosphate isomerase [EC:5.3.1.9] | (RefSeq) glucose-6-phosphate isomerase 1, chloroplastic (A)
GLYMA_04G095700	4070	2.71667	10.1567	105.667	331	1.78913	up	2.07167e-14	9.74538e-13	At1g09700	--
GLYMA_04G097000	2053	3.71667	1.47667	150.667	49	-1.45811	down	3.16865e-06	4.83821e-05	At4g14600	K08505 protein transport protein SFT1 | (RefSeq) bet1-like protein At4g14600 isoform X2 (A)
GLYMA_04G097100	3378	6.72333	3.05333	330.333	126.333	-1.24901	down	7.32354e-08	1.52975e-06	At1g12680	K13412 calcium-dependent protein kinase [EC:2.7.11.1] | (RefSeq) calcium-dependent protein kinase SK5-like (A)
GLYMA_04G097700	4325	17.73	5.29333	640.333	164	-1.84675	down	2.99195e-17	1.82818e-15	At5g65380	K03327 multidrug resistance protein, MATE family | (RefSeq) protein DETOXIFICATION 27 (A)
GLYMA_04G097800	246	20.43	5.41333	103.667	22.6667	-2.04421	down	1.18447e-07	2.38701e-06	--	--
GLYMA_04G098000	1390	7.56667	22.2867	217.667	522	1.43113	up	1.26157e-07	2.52389e-06	At4g40080	K20043 clathrin coat assembly protein AP180 | (RefSeq) putative clathrin assembly protein At4g40080 (A)
GLYMA_04G099000	7712	10.39	5.26667	504.333	214.333	-1.09184	down	1.9819e-06	3.15816e-05	Hs13654276	K00777 queuine tRNA-ribosyltransferase catalytic subunit [EC:2.4.2.64] | (RefSeq) queuine tRNA-ribosyltransferase catalytic subunit 1 (A)
GLYMA_04G099600	1703	1.19	2.58667	39	74.3333	1.03541	up	0.0049039	0.0288752	At1g78310	--
GLYMA_04G100300	1316	39.8233	160.34	1027.67	3556.33	1.90694	up	1.18661e-14	5.73917e-13	At1g35140	--
GLYMA_04G100600	4928	0.903333	3.03667	31.6667	91.3333	1.64785	up	1.99996e-07	3.86268e-06	At1g78260	K25006 RNA-binding protein 24/38 | (RefSeq) RNA-binding protein 38 (A)
GLYMA_04G100900	1955	3.47667	1.79	136.333	59	-1.07041	down	7.02995e-05	0.000781325	At4g08940	--
GLYMA_04G102700	5790	2.77667	6.90667	109.333	232	1.20863	up	0.000658301	0.00544593	At1g34580	K24193 MFS transporter, SP family, sugar:H+ symporter | (RefSeq) sugar transport protein 5 (A)
GLYMA_04G103400	3850	13.77	41.7167	771	1941.33	1.48327	up	6.11348e-15	3.03377e-13	At1g78120	K09527 DnaJ homolog subfamily C member 7 | (RefSeq) TPR repeat-containing thioredoxin TTL1 (A)
GLYMA_04G103500	1779	4.00333	1.83	147.333	55	-1.25937	down	8.24455e-05	0.000897348	At1g78110	--
GLYMA_04G103600	2933	2.18667	0.493333	81.3333	15.6667	-2.23974	down	1.16991e-07	2.35905e-06	At5g65140	K01087 trehalose 6-phosphate phosphatase [EC:3.1.3.12] | (RefSeq) probable trehalose-phosphate phosphatase J (A)
GLYMA_04G103900	1940	174.173	71.47	6766.67	2341	-1.39407	down	9.21962e-18	5.87387e-16	At1g78080	K09286 EREBP-like factor | (RefSeq) DREB3; dehydration responsive element-binding protein 3 (A)
GLYMA_04G104400	4274	2.35667	0.916667	108.667	35.3333	-1.47986	down	0.000707722	0.00578234	At1g22180	K19996 phosphatidylinositol transfer protein SFH5 | (RefSeq) patellin-3 (A)
GLYMA_04G104500	3929	8.42333	4.12	287.333	120.667	-1.13673	down	3.48402e-06	5.26358e-05	At1g22170	K01834 2,3-bisphosphoglycerate-dependent phosphoglycerate mutase [EC:5.4.2.11] | (RefSeq) 2,3-bisphosphoglycerate-dependent phosphoglycerate mutase 1 isoform X2 (A)
GLYMA_04G109100	985	5.41667	1.66667	111.333	27.6667	-1.8323	down	5.79593e-06	8.293e-05	At1g22340	K13691 pathogen-inducible salicylic acid glucosyltransferase [EC:2.4.1.-] | (RefSeq) flavonol 7-O-beta-glucosyltransferase UGT74F1 (A)
GLYMA_04G109200	2463	1.75	0.84	46.6667	19	-1.16984	down	0.00484239	0.0285865	At1g22370	K13691 pathogen-inducible salicylic acid glucosyltransferase [EC:2.4.1.-] | (RefSeq) UDP-glycosyltransferase 74G1 (A)
GLYMA_04G109500	8034	1.63667	8.26333	78.3333	340.667	2.24852	up	1.13408e-07	2.29219e-06	At5g36930	K13457 disease resistance protein RPM1 | (RefSeq) disease resistance protein RPM1 (A)
GLYMA_04G111300	4069	0.983333	2.22667	35.3333	69.3333	1.08404	up	0.00235828	0.0160969	At1g71380	K01179 endoglucanase [EC:3.2.1.4] | (RefSeq) endoglucanase 9 (A)
GLYMA_04G111600	4239	14.87	3.88	780.667	170.333	-2.05362	down	1.09652e-25	1.28077e-23	At4g10170	--
GLYMA_04G118700	1089	1674.93	635.12	37468.3	11679.7	-1.52094	down	3.15897e-12	1.14914e-10	At5g62350	K01051 pectinesterase [EC:3.1.1.11] | (RefSeq) pectinesterase/pectinesterase inhibitor (A)
GLYMA_04G119700	5924	21.7633	7.40667	1935.33	548	-1.67589	down	8.09516e-09	1.94533e-07	At5g51460	K01087 trehalose 6-phosphate phosphatase [EC:3.1.3.12] | (RefSeq) trehalose-phosphate phosphatase A (A)
GLYMA_04G129200	8112	0.103333	0.95	13.3333	102	3.08867	up	1.44333e-13	6.18774e-12	Hs14424433	K14802 phospholipid-transporting ATPase [EC:7.6.2.1] | (RefSeq) phospholipid-transporting ATPase 1 (A)
GLYMA_04G135200	1040	14.2733	5.09667	309.333	89.6667	-1.61593	down	5.63007e-07	9.8944e-06	--	--
GLYMA_04G136300	435	3.34333	9.43667	30.3333	69.3333	1.35145	up	0.00673612	0.0373516	At5g42380	K13448 calcium-binding protein CML | (RefSeq) putative calcium-binding protein (A)
GLYMA_04G136600	865	16.6867	99.48	297	1446.67	2.45275	up	9.27149e-20	7.17079e-18	At1g76650	K13448 calcium-binding protein CML | (RefSeq) putative calcium-binding protein (A)
GLYMA_04G136700	5250	0.483333	1.16333	46	92.6667	1.14569	up	0.000996072	0.00780722	At3g54430	--
GLYMA_04G140400	1601	49.3467	20.69	937.667	325.667	-1.37673	down	1.13118e-09	3.05382e-08	At3g27890	K19784 chromate reductase, NAD(P)H dehydrogenase (quinone) | (RefSeq) putative NADPH:quinone oxidoreductase (A)
GLYMA_04G141800	1812	6.43	3.42333	238	105.333	-1.02406	down	0.000206471	0.00201255	At5g13810	K17479 glutaredoxin domain-containing cysteine-rich protein 1 | (RefSeq) uncharacterized protein At5g39865 (A)
GLYMA_04G144900	6799	1.79667	4.82667	159.667	362.667	1.32202	up	3.41374e-07	6.2958e-06	At1g68710	K01530 phospholipid-translocating ATPase [EC:7.6.2.1] | (RefSeq) putative phospholipid-transporting ATPase 9 (A)
GLYMA_04G147000	3423	4.63	1.46333	277.333	74	-1.77448	down	3.35662e-14	1.5328e-12	At2g25490	K14515 EIN3-binding F-box protein | (RefSeq) EIN3-binding F-box protein 1 (A)
GLYMA_04G149300	2968	14.32	46.5633	850	2334	1.59438	up	3.77773e-15	1.90495e-13	At2g26640	K15397 3-ketoacyl-CoA synthase [EC:2.3.1.199] | (RefSeq) 3-ketoacyl-CoA synthase 11 (A)
GLYMA_04G152800	2494	0.366667	1.29	18.3333	53.6667	1.70778	up	0.000444398	0.00390497	At3g25590	--
GLYMA_04G155400	2887	0.23	1.03333	12	46.3333	2.07482	up	2.35055e-05	0.000293199	At5g57830	--
GLYMA_04G156900	4304	21.81	4.15667	654	105.667	-2.50283	down	3.663e-33	7.48735e-31	At1g18490	K23953 plant cysteine oxidase [EC:1.13.11.-] | (RefSeq) plant cysteine oxidase 3 (A)
GLYMA_04G158800	1869	0.406667	1.34333	14.6667	42	1.64076	up	0.00154315	0.0112825	At5g60850	--
GLYMA_04G159600	4751	0.513333	1.57333	33	87.6667	1.52574	up	5.44599e-06	7.87101e-05	At1g69170	--
GLYMA_04G162300	162	1.58667	9.25667	5	25.3333	2.45959	up	0.00182579	0.013024	--	--
GLYMA_04G162400	2396	0.786667	6.16667	37.6667	250.333	2.86677	up	2.85235e-18	1.90564e-16	At5g61010	K07195 exocyst complex component 7 | (RefSeq) exocyst complex component EXO70E2 (A)
GLYMA_04G164300	2613	0.296667	1.63333	16	72.3333	2.31866	up	2.43022e-09	6.25591e-08	At3g60580	--
GLYMA_04G165400	4180	0.746667	1.62667	57.3333	106.667	1.02495	up	0.00265659	0.0176968	At1g74360	K13415 protein brassinosteroid insensitive 1 [EC:2.7.10.1 2.7.11.1] | (RefSeq) BRI1B; brassinosteroid receptor precursor (A)
GLYMA_04G165800	1726	2.01	6.37667	66.6667	186.333	1.58264	up	1.49611e-07	2.95733e-06	At5g61340	--
GLYMA_04G167300	2620	54.02	22.6267	1309.33	457.333	-1.37099	down	1.75713e-13	7.45858e-12	At1g18720	--
GLYMA_04G167500	1860	25.92	7.23	807.333	188.333	-1.95587	down	3.02703e-24	3.24839e-22	At1g08570	K03671 thioredoxin 1 | (RefSeq) thioredoxin H-type (A)
GLYMA_04G167900	2166	0.34	1.26333	11.6667	35.6667	1.76658	up	0.00559977	0.032044	At3g47470	K08910 light-harvesting complex I chlorophyll a/b binding protein 4 | (RefSeq) chlorophyll a-b binding protein P4, chloroplastic (A)
GLYMA_04G171200	2682	1.45667	3.26667	28.6667	54.6667	1.05813	up	0.00342143	0.0216336	At1g74520	K17279 receptor expression-enhancing protein 5/6 | (RefSeq) HVA22-like protein a (A)
GLYMA_04G171800	1156	11.0667	2.99	255.667	58.6667	-1.99549	down	2.68671e-16	1.51249e-14	At1g16390	K08202 MFS transporter, OCT family, solute carrier family 22 (organic cation transporter), member 4/5 | (RefSeq) organic cation/carnitine transporter 4 (A)
GLYMA_04G172300	2936	6.22	15.2233	364.667	752.333	1.18101	up	2.7496e-07	5.15962e-06	At1g74510	--
GLYMA_04G172500	2321	2.48667	6.46	45.3333	103.667	1.29166	up	0.000331988	0.0030377	At1g74500	--
GLYMA_04G177900	2575	8.65667	43.7167	188.333	777	2.21169	up	9.14797e-17	5.33347e-15	At5g62920	K14492 two-component response regulator ARR-A family | (RefSeq) response regulator ARR6-like (A)
GLYMA_04G180900	6833	16.23	8.48667	2076	916.667	-1.0426	down	3.0626e-05	0.000373605	At1g23870	K16055 trehalose 6-phosphate synthase/phosphatase [EC:2.4.1.15 3.1.3.12] | (RefSeq) probable alpha,alpha-trehalose-phosphate synthase [UDP-forming] 9 isoform X2 (A)
GLYMA_04G181900	3904	3.03333	6.60333	159.667	291.333	1.00528	up	1.64481e-05	0.000212102	At5g62820	--
GLYMA_04G183100	2925	87.0133	2.01667	2668.67	53.3333	-5.53658	down	2.80774e-111	1.92835e-107	At5g62520	--
GLYMA_04G183300	1464	8.36667	2.51333	252	62	-1.85847	down	1.70397e-10	5.08346e-09	At5g62770	--
GLYMA_04G185400	2895	2.63	0.436667	151	21.6667	-2.68869	down	1.96923e-12	7.37442e-11	At2g01210	--
GLYMA_04G187300	2099	0.4	1.59333	13.6667	46.6667	1.88155	up	0.00202313	0.0141409	At5g26655	K09422 transcription factor MYB, plant | (RefSeq) transcription factor MYB86 (A)
GLYMA_04G189000	1141	3.33667	0.736667	74	13	-2.31935	down	4.01951e-06	5.99088e-05	--	--
GLYMA_04G189800	1923	14.1933	4.04667	121.667	29.6667	-1.91025	down	2.23798e-08	5.08956e-07	At4g24750	--
GLYMA_04G190400	2363	5.42	11.8033	250.667	471.667	1.02855	up	2.70319e-05	0.000332892	At2g31880	K13415 protein brassinosteroid insensitive 1 [EC:2.7.10.1 2.7.11.1] | (RefSeq) BRI1B; brassinosteroid receptor precursor (A)
GLYMA_04G190900	2890	1.84	0.81	52.3333	19.6667	-1.28233	down	0.00588678	0.0333529	At3g48360	K10523 speckle-type POZ protein | (RefSeq) BTB/POZ domain-containing protein At1g21780 (A)
GLYMA_04G192500	2625	1.10667	2.86333	48	108.333	1.27847	up	7.88142e-05	0.00086221	At5g50300	K06901 adenine/guanine/hypoxanthine permease | (RefSeq) adenine/guanine permease AZG2 (A)
GLYMA_04G194800	1476	10.5733	33.2333	322.667	825.667	1.52332	up	9.11302e-07	1.53855e-05	--	K13448 calcium-binding protein CML | (RefSeq) calcium-binding protein CML38 (A)
GLYMA_04G195700	1797	5.07333	11.3433	166.333	313.333	1.04826	up	6.59349e-06	9.31771e-05	At1g67340	--
GLYMA_04G199400	6418	9.43667	2.68	678	163.333	-1.92121	down	1.95774e-18	1.33391e-16	At3g26890	--
GLYMA_04G199900	2922	12.19	1.58667	461.667	52	-3.04089	down	1.9416e-28	2.62499e-26	At3g23690	K23050 phenylcoumaran benzylic ether reductase [EC:1.3.1.-] | (RefSeq) eugenol synthase 1 (A)
GLYMA_04G200200	3670	3.41333	7.50667	135.333	254.667	1.02983	up	6.39037e-05	0.000717846	At1g28110	K16297 serine carboxypeptidase-like clade II [EC:3.4.16.-] | (RefSeq) serine carboxypeptidase-like 45 (A)
GLYMA_04G205100	1774	10.86	3.63333	291.333	82.6667	-1.68528	down	2.46839e-08	5.56563e-07	At4g09460	K09422 transcription factor MYB, plant | (RefSeq) myb-related protein 308-like (A)
GLYMA_04G205700	3332	3.01333	1.60333	189	85.6667	-1.01886	down	4.2679e-05	0.000502778	At5g64710	K17573 meiosis arrest female protein 1 | (RefSeq) uncharacterized protein LOC100819329 (A)
GLYMA_04G206800	829	13.3267	4.73667	226.333	66.3333	-1.61741	down	9.91544e-09	2.35149e-07	At5g53590	K14488 SAUR family protein | (RefSeq) auxin-induced protein 6B-like (A)
GLYMA_04G212000	1262	22.37	7.34	385.667	103	-1.73923	down	3.49838e-08	7.68122e-07	At5g64530	--
GLYMA_04G212300	1976	0.33	1.09667	13	36.6667	1.61399	up	0.00146053	0.010772	At1g49780	K09561 STIP1 homology and U-box containing protein 1 [EC:2.3.2.27] | (RefSeq) E3 ubiquitin-protein ligase CHIP (A)
GLYMA_04G213900	4167	138.4	2.67667	4716.67	77	-5.8034	down	1.3745e-56	1.02609e-53	At1g77120	K18857 alcohol dehydrogenase class-P [EC:1.1.1.1] | (RefSeq) alcohol dehydrogenase (A)
GLYMA_04G214000	1041	3.53667	1.24	74.6667	22	-1.61941	down	9.56676e-05	0.00101867	At5g64620	--
GLYMA_04G217400	1591	10.41	0.383333	259.667	8.33333	-4.86096	down	1.2089e-33	2.53132e-31	At5g64750	K09286 EREBP-like factor | (RefSeq) ethylene-responsive transcription factor RAP2-3 (A)
GLYMA_04G219000	1904	52.66	28.39	1121.67	503.667	-1.00992	down	1.07473e-07	2.18509e-06	At5g09960	--
GLYMA_04G219200	5149	7.62333	3.02667	220	73.6667	-1.44557	down	4.22711e-09	1.05188e-07	At2g21940	K00891 shikimate kinase [EC:2.7.1.71] | (RefSeq) shikimate kinase, chloroplastic isoform X2 (A)
GLYMA_04G223100	1072	7.03667	2.85333	152.333	51.6667	-1.41848	down	1.97574e-07	3.82022e-06	--	--
GLYMA_04G223300	2679	13.23	35.16	392.667	868.333	1.29526	up	1.36341e-09	3.63223e-08	At3g56400	K13425 WRKY transcription factor 22 | (RefSeq) WRKY transcription factor 22 (A)
GLYMA_04G226700	3419	57.3667	246.21	2933.33	10653	1.99442	up	5.16159e-30	8.28266e-28	At4g35580	--
GLYMA_04G228700	2936	36.4267	141.19	1643.33	5370.67	1.84379	up	1.88215e-14	8.9026e-13	At1g64720	--
GLYMA_04G228800	3529	68.0467	257.567	588	1825	1.79707	up	4.82164e-13	1.93429e-11	--	--
GLYMA_04G233400	5063	11.5067	1.65	927.667	113	-2.90962	down	6.85501e-40	2.15964e-37	At5g24320	K20241 WD repeat-containing protein 44 | (RefSeq) WD repeat-containing protein 44 isoform X1 (A)
GLYMA_04G234700	4387	0.423333	1.64333	14.3333	47.6667	1.85726	up	0.000130595	0.00134109	At4g27810	--
GLYMA_04G235800	2903	6.95333	3.73	402.667	183	-1.00734	down	2.22186e-06	3.50798e-05	At3g49240	--
GLYMA_04G236400	5261	29.5	4.73	831.667	112.667	-2.75184	down	1.19333e-38	3.50247e-36	At5g53420	--
GLYMA_04G238100	1308	71.2233	25.28	927.667	272.667	-1.61476	down	2.79524e-08	6.2574e-07	At5g53190	K15382 solute carrier family 50 (sugar transporter) | (RefSeq) SWEET7; bidirectional sugar transporter SWEET3 (A)
GLYMA_04G238300	2641	2.04	5.67667	72	168.667	1.37243	up	0.000268653	0.00252893	At4g23810	K13426 WRKY transcription factor 29 | (RefSeq) probable WRKY transcription factor 29 (A)
GLYMA_04G238700	1723	18.5567	9.18667	644.333	267.667	-1.12919	down	1.25157e-09	3.34987e-08	At4g27950	K13434 pathogenesis-related genes transcriptional activator PTI6 | (RefSeq) pathogenesis-related genes transcriptional activator PTI6 (A)
GLYMA_04G240800	2999	196.443	10.46	5876.67	267.667	-4.33993	down	5.2486e-86	1.28741e-82	At1g77120	K18857 alcohol dehydrogenase class-P [EC:1.1.1.1] | (RefSeq) ADH2; alcohol dehydrogenase family protein (A)
GLYMA_04G242400	1396	45.97	11.2433	1301.33	266.333	-2.14165	down	1.48193e-15	7.75752e-14	At1g31130	--
GLYMA_04G244300	978	1.76333	4.87	34	80.6667	1.36494	up	0.000210244	0.0020418	At1g21510	--
GLYMA_04G245000	955	12.6933	6.72333	257.333	108.333	-1.05655	down	0.00455629	0.0272157	At1g21550	K13448 calcium-binding protein CML | (RefSeq) putative calcium-binding protein (A)
GLYMA_04G246600	3170	1.46333	3.17	55	103.333	1.01963	up	0.00424161	0.0257526	At1g44110	K06627 cyclin-A | (RefSeq) CYCA1;1; mitotic cyclin a2-type (A)
GLYMA_04G247600	8162	30.32	11.83	1142.67	375.333	-1.47118	down	7.94759e-18	5.13008e-16	At1g44350	K21604 jasmonoyl-L-amino acid hydrolase [EC:3.5.1.127] | (RefSeq) IAA-amino acid hydrolase ILR1-like 6 (A)
GLYMA_04G248400	1032	5.61667	1.77333	108.333	28.3333	-1.78291	down	3.66431e-06	5.49966e-05	--	--
GLYMA_04G249000	2912	105.803	34.4033	5242	1430	-1.73588	down	5.94435e-19	4.23504e-17	At1g01720	--
GLYMA_04G251000	5259	19.4867	44.3067	749.333	1435.67	1.07237	up	4.60318e-09	1.14132e-07	At4g08290	--
GLYMA_04G251500	4159	8.7	3.75667	162.333	59	-1.3212	down	8.80178e-07	1.4904e-05	At1g44835	--
GLYMA_04G251700	2400	8.58	1.91	304.667	58.6667	-2.26532	down	2.04576e-16	1.1631e-14	At1g77660	--
GLYMA_04G252600	2162	0.37	1.25	12	36.3333	1.69411	up	0.0013341	0.0100007	At1g47860_1	--
GLYMA_04G253100	4553	1.31	3.26333	72.6667	152	1.21211	up	0.000273173	0.00256726	At1g21980	K00889 1-phosphatidylinositol-4-phosphate 5-kinase [EC:2.7.1.68] | (RefSeq) phosphatidylinositol 4-phosphate 5-kinase 1 (A)
GLYMA_05G004400	1976	1.7	0.23	67.3333	7.66667	-3.00145	down	5.41362e-11	1.72452e-09	At3g27650	K13944 LOB domain-containing protein 16 | (RefSeq) LOB domain-containing protein 16 (A)
GLYMA_05G006600	3600	20.5833	53.81	446.667	960.667	1.26261	up	2.28759e-07	4.37394e-06	At5g14700	K09753 cinnamoyl-CoA reductase [EC:1.2.1.44] | (RefSeq) cinnamoyl-CoA reductase 1 (A)
GLYMA_05G009000	1214	18.76	0.3	283	4	-6.08259	down	4.85041e-09	1.19916e-07	At5g25940	--
GLYMA_05G009100	769	19.1233	0.18	121.333	1	-6.80536	down	2.1275e-14	9.98066e-13	At5g25940	--
GLYMA_05G010500	949	102.11	39.25	1998	629	-1.50063	down	1.0668e-09	2.8914e-08	At1g52720	--
GLYMA_05G013700	785	40.62	15.2667	668.333	200.667	-1.53722	down	2.00997e-05	0.000254978	At1g49000	--
GLYMA_05G015400	7293	13.7833	37.82	1322.33	3142.33	1.36026	up	1.05861e-06	1.77072e-05	At1g68710	K01530 phospholipid-translocating ATPase [EC:7.6.2.1] | (RefSeq) putative phospholipid-transporting ATPase 9 isoform X1 (A)
GLYMA_05G017500	1845	8.15333	3.99667	306	124.667	-1.14961	down	2.07405e-06	3.28822e-05	At5g08140_1	K11982 E3 ubiquitin-protein ligase RNF115/126 [EC:2.3.2.27] | (RefSeq) E3 ubiquitin-protein ligase RING1-like (A)
GLYMA_05G019000	5457	0.486667	1.46333	32	86.6667	1.52601	up	0.00347975	0.0219578	At1g69170	--
GLYMA_05G024000	5051	0.77	2.43	51.3333	142.333	1.57225	up	0.000235318	0.00225658	At1g74360	K13415 protein brassinosteroid insensitive 1 [EC:2.7.10.1 2.7.11.1] | (RefSeq) BRI1B; brassinosteroid receptor precursor (A)
GLYMA_05G024400	5566	1.38	3.54	76.3333	174	1.27561	up	0.000312723	0.0028868	At1g18670	K08819 cyclin-dependent kinase 12/13 [EC:2.7.11.22 2.7.11.23] | (RefSeq) probable serine/threonine-protein kinase At1g54610 (A)
GLYMA_05G025500	2021	37.42	17.0567	1435.67	533.333	-1.25868	down	5.45533e-07	9.59222e-06	At5g61430	--
GLYMA_05G026100	2431	11.5733	5.79	354.333	147.667	-1.10747	down	0.00011577	0.0012018	At1g74460	--
GLYMA_05G030300	2490	1.06667	0.133333	37.6667	4	-3.11487	down	5.93233e-07	1.03639e-05	At5g28470	K14638 solute carrier family 15 (peptide/histidine transporter), member 3/4 | (RefSeq) protein NRT1/ PTR FAMILY 1.2 (A)
GLYMA_05G030600	2954	0.283333	0.833333	11.3333	30	1.50008	up	0.00450621	0.0269729	At5g62680	K14638 solute carrier family 15 (peptide/histidine transporter), member 3/4 | (RefSeq) protein NRT1/ PTR FAMILY 1.2 (A)
GLYMA_05G031000	9665	3.72333	7.99	455	846.667	1.00769	up	3.85708e-05	0.000458947	At3g47910	--
GLYMA_05G031400	2229	0.246667	0.81	11.6667	30.6667	1.55345	up	0.00551282	0.0316467	At5g40010	K08900 mitochondrial chaperone BCS1 | (RefSeq) AAA-ATPase ASD, mitochondrial isoform X1 (A)
GLYMA_05G032700	4270	4.86	1.64	405.667	113.333	-1.6869	down	2.84682e-12	1.04556e-10	At3g48070	K10643 CCR4-NOT transcription complex subunit 4 [EC:2.3.2.27] | (RefSeq) uncharacterized protein LOC100807521 isoform X1 (A)
GLYMA_05G033000	2558	3.77667	2.02	85	37.6667	-1.02337	down	0.00226453	0.0155777	At3g48100	K14492 two-component response regulator ARR-A family | (RefSeq) uncharacterized protein LOC100527518 (A)
GLYMA_05G034500	1639	27.59	11.48	452	155.333	-1.38072	down	6.59731e-08	1.38479e-06	At4g09600	--
GLYMA_05G039100	2889	0.3	1.58	17.6667	77.6667	2.27275	up	6.10334e-09	1.48962e-07	At5g65700	K13420 LRR receptor-like serine/threonine-protein kinase FLS2 [EC:2.7.11.1] | (RefSeq) probable LRR receptor-like serine/threonine-protein kinase At3g47570 (A)
GLYMA_05G040800	2752	5.43333	17.3733	294.667	807.667	1.57756	up	5.93828e-14	2.65521e-12	At3g26600	--
GLYMA_05G041300	1992	8.67667	4.15	338.667	140.333	-1.1597	down	6.05086e-05	0.00068486	At1g15530	K13416 brassinosteroid insensitive 1-associated receptor kinase 1 [EC:2.7.10.1 2.7.11.1] | (RefSeq) BRASSINOSTEROID INSENSITIVE 1-associated receptor kinase 1 (A)
GLYMA_05G042300	2676	0.743333	3.60667	40.3333	161.333	2.15993	up	1.88115e-08	4.32097e-07	At4g24730	K01517 manganese-dependent ADP-ribose/CDP-alcohol diphosphatase [EC:3.6.1.13 3.6.1.16 3.6.1.53] | (RefSeq) manganese-dependent ADP-ribose/CDP-alcohol diphosphatase (A)
GLYMA_05G042700	6486	16.4733	8.1	1816.67	750.667	-1.13595	down	1.81074e-12	6.81808e-11	At4g24740	K08287 dual-specificity kinase [EC:2.7.12.1] | (RefSeq) uncharacterized protein LOC100804022 (A)
GLYMA_05G042800	3836	1.27333	0.163333	46	5	-3.06036	down	1.1773e-05	0.000157493	At3g26190	K20617 cytochrome P450 family 71 subfamily A | (RefSeq) CYP71A9; cytochrome P450 71A9 precursor (A)
GLYMA_05G043600	4708	1.2	2.77	38.3333	76.3333	1.11334	up	0.000498669	0.0043156	At4g24760	K01076 abhydrolase domain-containing protein 17 [EC:3.1.2.22] | (RefSeq) alpha/beta hydrolase domain-containing protein 17B (A)
GLYMA_05G043800	745	31.11	12.04	485	152.667	-1.49515	down	1.22075e-05	0.000162546	--	--
GLYMA_05G043900	2254	62.45	22.93	1356	415.667	-1.56075	down	1.14824e-10	3.50806e-09	At3g48360	K10523 speckle-type POZ protein | (RefSeq) BTB/POZ and MATH domain-containing protein 4 (A)
GLYMA_05G047100	855	29.8833	85.9967	544.333	1242.33	1.38983	up	7.48598e-05	0.00082473	--	K13448 calcium-binding protein CML | (RefSeq) putative calcium-binding protein CML19 (A)
GLYMA_05G047800	2893	12.5667	6.73333	725.667	330	-1.00444	down	5.45406e-06	7.87659e-05	At5g50380	K07195 exocyst complex component 7 | (RefSeq) exocyst complex component EXO70B1 (A)
GLYMA_05G049400	2982	20.4367	58.7967	659	1580.33	1.40597	up	1.83325e-12	6.88773e-11	At1g12710	--
GLYMA_05G049800	549	27.54	72.8733	312.667	677	1.27429	up	3.62742e-07	6.63996e-06	At1g63040	K09286 EREBP-like factor | (RefSeq) ethylene-responsive transcription factor ERF023 (A)
GLYMA_05G049900	765	108.8	324.733	1751.33	4191.33	1.44656	up	1.21353e-06	2.0122e-05	At1g12610	K09286 EREBP-like factor | (RefSeq) ethylene-responsive transcription factor ERF023 (A)
GLYMA_05G052800	1188	23.41	6.17	534	115.333	-2.045	down	1.91747e-12	7.19626e-11	At2g45360	--
GLYMA_05G053200	3115	0.643333	1.82333	38.3333	96	1.42178	up	7.48482e-05	0.00082473	At1g62870	--
GLYMA_05G053900	3278	12.3	4.87333	535.333	179	-1.44324	down	2.3007e-08	5.21491e-07	At1g12420	--
GLYMA_05G054000	1578	1.57333	0.59	50.3333	15.6667	-1.53438	down	0.000457119	0.00400446	At4g22790	K03327 multidrug resistance protein, MATE family | (RefSeq) protein DETOXIFICATION 56 isoform X1 (A)
GLYMA_05G054500	3664	17.6633	8.28333	625.667	249	-1.20264	down	3.44801e-11	1.11597e-09	At1g12450	--
GLYMA_05G057200	815	20.71	45.37	330.333	628.333	1.03456	up	1.56013e-05	0.000202169	At1g62510	--
GLYMA_05G057400	1275	2.52667	0.84	69.3333	18.3333	-1.724	down	0.00977231	0.0498783	At1g62510	--
GLYMA_05G058100	2611	428.913	109.923	15298.7	3347.67	-2.06929	down	7.6114e-37	1.89403e-34	At4g17260	K00016 L-lactate dehydrogenase [EC:1.1.1.27] | (RefSeq) L-lactate dehydrogenase B (A)
GLYMA_05G058900	2020	0.373333	1.27667	14.6667	43.6667	1.69473	up	0.000535448	0.00457395	At4g16560_1	K22683 aspartyl protease family protein [EC:3.4.23.-] | (RefSeq) aspartyl protease family protein 2 (A)
GLYMA_05G059300	8102	29.5433	102.44	1261	3658.33	1.68507	up	2.61065e-14	1.21148e-12	At2g35710	K22809 inositol phosphorylceramide glucuronosyltransferase 1 [EC:2.4.1.-] | (RefSeq) inositol phosphorylceramide glucuronosyltransferase 1 isoform X1 (A)
GLYMA_05G066600	5326	1.67667	6.88333	77.6667	265.333	1.92015	up	5.69415e-13	2.27899e-11	At5g04770	K03294 basic amino acid/polyamine antiporter, APA family | (RefSeq) cationic amino acid transporter 1 (A)
GLYMA_05G067200	4246	1.94667	0.226667	162	16.3333	-3.18894	down	2.80377e-17	1.71931e-15	At2g35170	--
GLYMA_05G068500	1392	52.34	11.2133	1318.67	241.333	-2.33176	down	1.38552e-31	2.46522e-29	At4g17670	--
GLYMA_05G072400	246	1.55333	12.9233	6.66667	54	3.0548	up	2.18581e-05	0.000275198	--	--
GLYMA_05G073500	3550	2.80667	1.3	173	67.3333	-1.22607	down	8.73119e-06	0.000119788	At3g26000	--
GLYMA_05G082500	5763	14.4133	137.44	1107.67	8955	3.14812	up	1.90535e-45	8.17874e-43	At5g66900	K13457 disease resistance protein RPM1 | (RefSeq) disease resistance protein RPM1 (A)
GLYMA_05G083900	917	0.82	3.29333	14	50.6667	1.93828	up	0.00250115	0.0168974	--	--
GLYMA_05G088700	1505	4.61	2.49333	144	63.6667	-1.01613	down	0.00257714	0.0172816	--	--
GLYMA_05G094400	1026	11.51	101	235.667	1745	3.02779	up	9.75564e-47	4.46678e-44	At5g67080	K20716 mitogen-activated protein kinase kinase kinase 17/18 | (RefSeq) mitogen-activated protein kinase kinase kinase 18 (A)
GLYMA_05G101300	2921	0.85	2.20667	38.6667	86.3333	1.27501	up	0.00149324	0.0109709	At4g37390	K14487 auxin responsive GH3 gene family | (RefSeq) GH3; auxin-responsive protein GH3 (A)
GLYMA_05G102800	1807	3.86	9.18667	104.333	211.667	1.14661	up	4.27598e-07	7.73642e-06	At4g37470	--
GLYMA_05G103400	2712	0.56	1.31333	29.6667	60.6667	1.14188	up	0.00352935	0.0222137	At3g49950	K14494 DELLA protein | (RefSeq) DELLA protein DWARF8 (A)
GLYMA_05G104800	1935	0.826667	0.223333	27	6.33333	-1.97873	down	0.00199398	0.0139913	At4g37580	--
GLYMA_05G106700	4709	11.3133	4.64	476.333	168.333	-1.38943	down	6.71576e-07	1.15831e-05	At5g67620	--
GLYMA_05G108200	1393	2.35333	0.663333	68.3333	15.6667	-1.96399	down	1.3531e-05	0.00017762	At2g22850	--
GLYMA_05G108900	2099	0.71	0.0633333	26.3333	2	-3.59867	down	7.19594e-06	0.000100861	At3g49700	K01762 1-aminocyclopropane-1-carboxylate synthase [EC:4.4.1.14] | (RefSeq) ACS2; 1-aminocyclopropane-1-carboxylate synthase 3 (A)
GLYMA_05G109200	2172	2.95	0.326667	96.3333	9	-3.28247	down	3.36835e-11	1.09431e-09	At5g65790	K09422 transcription factor MYB, plant | (RefSeq) transcription factor RAX3 (A)
GLYMA_05G109500	1717	22.72	9.27	620.333	204	-1.41528	down	0.000126615	0.00130508	At4g37790	K09338 homeobox-leucine zipper protein | (RefSeq) homeobox-leucine zipper protein HAT22 (A)
GLYMA_05G110400	4064	3.81667	8.23667	255	489.667	1.02539	up	0.0016917	0.0122121	At5g65700	K00924 kinase [EC:2.7.1.-] | (RefSeq) NARK; nodule autoregulation receptor kinase precursor (A)
GLYMA_05G110600	3616	3.65	19.5033	175	775.667	2.30377	up	7.05309e-18	4.56987e-16	At4g37850	K13422 transcription factor MYC2 | (RefSeq) transcription factor MYC2 (A)
GLYMA_05G110900	2505	13.49	35.8667	492	1122	1.30194	up	2.58726e-10	7.54857e-09	At4g37850	K13422 transcription factor MYC2 | (RefSeq) transcription factor MYC2 (A)
GLYMA_05G111000	9835	0.76	0.356667	152.667	59	-1.22221	down	2.83712e-05	0.000348077	CE24479	--
GLYMA_05G111500	1597	68.09	32.5733	2122	881.667	-1.16459	down	1.89478e-07	3.68026e-06	At4g17800	--
GLYMA_05G119200	853	18.25	64.8033	314.333	934.667	1.71322	up	1.24361e-18	8.57539e-17	Hs8922629	K03686 molecular chaperone DnaJ | (RefSeq) chaperone protein DnaJ (A)
GLYMA_05G120500	1909	2.53	0.736667	76	18.3333	-1.89588	down	1.4027e-05	0.00018364	At5g64530	--
GLYMA_05G124000	1305	2.14333	0.483333	55.6667	10.6667	-2.25741	down	7.61281e-07	1.30321e-05	At5g06870	--
GLYMA_05G125200	1950	0.963333	3.38333	38.6667	112	1.68025	up	3.4114e-06	5.16979e-05	At5g44400	K22395 cinnamyl-alcohol dehydrogenase [EC:1.1.1.195] | (RefSeq) berberine bridge enzyme-like 13 (A)
GLYMA_05G127600	2443	1.58	0.483333	58.3333	15.3333	-1.81054	down	3.27984e-05	0.000397002	At4g18170	K18835 WRKY transcription factor 2 | (RefSeq) WRKY59; probable WRKY transcription factor 2 (A)
GLYMA_05G128000	1131	2.16	5.73333	51.3333	111.333	1.27176	up	0.0088698	0.0460661	At2g34430	K08912 light-harvesting complex II chlorophyll a/b binding protein 1 | (RefSeq) CAB3; chlorophyll a/b-binding protein (A)
GLYMA_05G128100	996	3.74333	1.37	69	21	-1.5692	down	3.28792e-05	0.0003977	--	--
GLYMA_05G128200	4310	33.7267	7.91	2463.33	498.333	-2.19191	down	3.9846e-17	2.39839e-15	At5g46330	K13420 LRR receptor-like serine/threonine-protein kinase FLS2 [EC:2.7.11.1] | (RefSeq) LRR receptor-like serine/threonine-protein kinase FLS2 (A)
GLYMA_05G130600	2781	1.92667	0.15	51	3.33333	-3.77601	down	3.48823e-08	7.66383e-07	At1g30040	K04125 gibberellin 2beta-dioxygenase [EC:1.14.11.13] | (RefSeq) gibberellin 2-beta-dioxygenase (A)
GLYMA_05G134800	4778	1.39667	3.73333	128	296	1.31597	up	3.45818e-06	5.23145e-05	At4g20140	K00924 kinase [EC:2.7.1.-] | (RefSeq) NARK; nodule autoregulation receptor kinase precursor (A)
GLYMA_05G135000	12773	3.15333	7.25667	518	1024.33	1.10383	up	0.000332495	0.00304071	At1g65780	K10706 senataxin [EC:3.6.4.-] | (RefSeq) uncharacterized protein LOC100794516 (A)
GLYMA_05G136900	5513	0.866667	2.10333	60.6667	130	1.19978	up	0.00077837	0.00629961	At2g01950	K13415 protein brassinosteroid insensitive 1 [EC:2.7.10.1 2.7.11.1] | (RefSeq) BRI1B; brassinosteroid receptor precursor (A)
GLYMA_05G137000	3408	0.56	1.98667	26.6667	78.3333	1.70243	up	2.49119e-06	3.88323e-05	At1g68130	--
GLYMA_05G137500	3016	0.623333	2.57	18	60.6667	1.91113	up	0.00018847	0.00185606	At1g17020	K24028 salicylic acid 3-hydroxylase [EC:1.14.11.-] | (RefSeq) protein DMR6-LIKE OXYGENASE 2 isoform X1 (A)
GLYMA_05G139500	4443	4.2	14.4167	164	482.667	1.68142	up	9.7885e-11	3.02554e-09	At1g70740	K13416 brassinosteroid insensitive 1-associated receptor kinase 1 [EC:2.7.10.1 2.7.11.1] | (RefSeq) BRASSINOSTEROID INSENSITIVE 1-associated receptor kinase 1 (A)
GLYMA_05G143400	3139	6.82667	41.43	170.333	836	2.46932	up	3.49009e-18	2.30038e-16	--	--
GLYMA_05G144500	5187	2.18667	6.06	103.333	243.333	1.36302	up	8.63125e-10	2.37308e-08	At1g67710	K14491 two-component response regulator ARR-B family | (RefSeq) two-component response regulator ARR11 isoform X3 (A)
GLYMA_05G144600	1467	0.4	2.15333	9	41.6667	2.3213	up	0.000230027	0.00221202	At3g26040	K13065 shikimate O-hydroxycinnamoyltransferase [EC:2.3.1.133] | (RefSeq) stemmadenine O-acetyltransferase isoform X1 (A)
GLYMA_05G144900	1165	1.07	2.59	18	36.6667	1.16065	up	0.00829973	0.0437337	At1g67660	--
GLYMA_05G145200	3387	0.376667	0.97	18.6667	42.3333	1.27686	up	0.005742	0.0326999	At3g04140	--
GLYMA_05G146300	4965	10.63	4.73	772	291.333	-1.27367	down	1.0195e-09	2.77854e-08	At1g67530	--
GLYMA_05G146400	10324	0.75	0.363333	54.6667	22.3333	-1.15951	down	0.00318678	0.0204626	At1g67490	K01228 mannosyl-oligosaccharide glucosidase [EC:3.2.1.106] | (RefSeq) mannosyl-oligosaccharide glucosidase GCS1 (A)
GLYMA_05G147100	2584	5.99	18.07	235.333	589.333	1.47033	up	1.35687e-07	2.70428e-06	At1g13710	K20619 cytochrome P450 family 78 subfamily A | (RefSeq) cytochrome P450 78A5 (A)
GLYMA_05G148100	7921	37.08	19.5067	3590.33	1612	-1.03062	down	1.54471e-07	3.04508e-06	At1g27320	K14489 arabidopsis histidine kinase 2/3/4 (cytokinin receptor) [EC:2.7.13.3] | (RefSeq) histidine kinase 3 (A)
GLYMA_05G148300	10592	60.6567	30.6367	4448.33	1905.33	-1.0919	down	1.02321e-08	2.42158e-07	At1g67310	K21596 calmodulin-binding transcription activator | (RefSeq) calmodulin-binding transcription activator 4 isoform X2 (A)
GLYMA_05G150100	533	18.3233	75.0467	199.667	674	1.9129	up	9.81014e-16	5.21486e-14	At3g57450	--
GLYMA_05G150200	5796	1.13333	2.97667	89	201	1.29435	up	3.12759e-07	5.82754e-06	At4g14190	--
GLYMA_05G150600	1936	1.35333	0.05	54	1.66667	-4.86241	down	1.06846e-09	2.8936e-08	At1g05560	K11820 N-hydroxythioamide S-beta-glucosyltransferase [EC:2.4.1.195] | (RefSeq) UDP-glycosyltransferase 74B1 (A)
GLYMA_05G152300	1879	6.81333	3.29	250.667	105	-1.147	down	1.9085e-05	0.000242913	At3g23820	K08679 UDP-glucuronate 4-epimerase [EC:5.1.3.6] | (RefSeq) UDP-glucuronate 4-epimerase 6 (A)
GLYMA_05G154900	574	9.07	39.72	107	387	2.00419	up	1.47511e-15	7.73363e-14	--	--
GLYMA_05G155500	2220	0.763333	2.30333	35	86.3333	1.46054	up	3.18413e-05	0.000386919	At3g13620	--
GLYMA_05G155600	1674	10.1733	3.41	357.667	97	-1.70683	down	7.50651e-07	1.2863e-05	At1g15670	--
GLYMA_05G157400	750	1.37333	3.84	21.6667	49	1.34107	up	0.00423233	0.0257008	At5g19790	K09286 EREBP-like factor | (RefSeq) ethylene-responsive transcription factor ERN3 (A)
GLYMA_05G158200	1856	2.40667	0.413333	53.6667	7.66667	-2.65762	down	3.29745e-07	6.10756e-06	At2g34140	--
GLYMA_05G158900	6476	0.313333	0.87	23.6667	54.6667	1.34086	up	0.00307547	0.0199004	At2g40260	K14491 two-component response regulator ARR-B family | (RefSeq) two-component response regulator ARR12 isoform X2 (A)
GLYMA_05G159100	2436	1.33333	5.69333	8.33333	30.3333	1.9926	up	0.000171607	0.0017091	At3g49340	K16292 KDEL-tailed cysteine endopeptidase [EC:3.4.22.-] | (RefSeq) CYSP2; cysteine proteinase precursor (A)
GLYMA_05G160500	1748	4.19	26.9833	149.667	795.667	2.5647	up	3.41345e-29	5.0525e-27	At2g42760	--
GLYMA_05G160700	1487	1.49333	0.296667	26.6667	4.66667	-2.41864	down	0.000844468	0.00676599	At1g29270	--
GLYMA_05G161500	1931	3.14667	1.60333	97	41.6667	-1.08883	down	0.00275135	0.0182185	At2g29420	K00799 glutathione S-transferase [EC:2.5.1.18] | (RefSeq) GSTU17; glutathione S-transferase GST 17 (A)
GLYMA_05G162100	3107	19.51	8.41333	1232.33	442	-1.32986	down	4.95671e-11	1.58191e-09	At1g29340	K08332 vacuolar protein 8 | (RefSeq) U-box domain-containing protein 15 (A)
GLYMA_05G162300	2394	12.49	6.47	578.333	249	-1.06874	down	3.8277e-07	6.98795e-06	At4g18880	K09419 heat shock transcription factor, other eukaryote | (RefSeq) HSF-11; heat stress transcription factor A-4c (A)
GLYMA_05G170700	6982	1.11333	4.39333	72.6667	254	1.89848	up	1.08661e-07	2.20534e-06	At4g20430	--
GLYMA_05G170900	2078	12.33	5.45333	277.333	102.667	-1.28628	down	4.74981e-06	6.98424e-05	At4g20390	--
GLYMA_05G173300	4197	3.64667	8.02333	165.333	300.667	1.01734	up	0.000571128	0.00483544	At1g13130	K01179 endoglucanase [EC:3.2.1.4] | (RefSeq) glycosyl hydrolase 5 family protein (A)
GLYMA_05G174000	4617	0.853333	3.06333	47	141.667	1.7341	up	5.40874e-09	1.33049e-07	At3g55270	K14165 atypical dual specificity phosphatase [EC:3.1.3.16 3.1.3.48] | (RefSeq) dual specificity protein phosphatase PHS1 (A)
GLYMA_05G175000	2931	6.03	19.8867	357.333	981.667	1.61002	up	7.40643e-13	2.93015e-11	At1g12990	K00737 beta-1,4-mannosyl-glycoprotein beta-1,4-N-acetylglucosaminyltransferase [EC:2.4.1.144] | (RefSeq) uncharacterized protein LOC100787062 (A)
GLYMA_05G175800	709	1.68333	6.62333	24.3333	79	1.84893	up	3.40225e-06	5.15974e-05	--	--
GLYMA_05G177400	2834	0.813333	2.17667	25.6667	58	1.30794	up	0.000442728	0.00389628	At5g09430	K13699 abhydrolase domain-containing protein 5 [EC:2.3.1.51] | (RefSeq) probable 1-acylglycerol-3-phosphate O-acyltransferase (A)
GLYMA_05G177700	1136	0.203333	0.906667	4.66667	17.3333	2.03964	up	0.0039717	0.024403	At1g34370	--
GLYMA_05G179800	2904	121.553	6.40667	3889.67	174	-4.35671	down	1.84219e-73	2.87549e-70	At5g65140	K01087 trehalose 6-phosphate phosphatase [EC:3.1.3.12] | (RefSeq) probable trehalose-phosphate phosphatase J (A)
GLYMA_05G180300	1389	1.33667	0.0266667	37.6667	0.666667	-5.68231	down	6.49494e-07	1.12304e-05	At5g65100	K14514 ethylene-insensitive protein 3 | (RefSeq) putative ETHYLENE INSENSITIVE 3-like 4 protein (A)
GLYMA_05G182100	1367	64.66	2.05333	1808.33	48	-5.09752	down	2.65002e-58	2.02226e-55	--	--
GLYMA_05G182600	4029	20.0667	9.63667	788.667	327	-1.16151	down	1.93799e-08	4.4367e-07	At4g39660	K00827 alanine-glyoxylate transaminase / (R)-3-amino-2-methylpropionate-pyruvate transaminase [EC:2.6.1.44 2.6.1.40] | (RefSeq) alanine--glyoxylate aminotransferase 2 homolog 1, mitochondrial (A)
GLYMA_05G183800	4631	21.4467	6.65333	1035.67	277.667	-1.78999	down	2.30302e-17	1.42497e-15	At2g03800	K09716 D-aminoacyl-tRNA deacylase [EC:3.1.1.96] | (RefSeq) uncharacterized protein LOC100808796 (A)
GLYMA_05G184200	2305	16.7467	6.96333	307.667	105.667	-1.38912	down	3.94495e-08	8.61218e-07	At5g09960	--
GLYMA_05G184500	3141	0.956667	3.62	19	60.3333	1.80688	up	1.53878e-05	0.000199674	At5g26170	K13424 WRKY transcription factor 33 | (RefSeq) probable WRKY transcription factor 33 isoform X2 (A)
GLYMA_05G186000	4342	5.17667	2.64333	309.667	131.333	-1.09142	down	4.15419e-06	6.1702e-05	At4g39380	--
GLYMA_05G186700	2135	182.39	4.9	6337	144	-5.32311	down	2.03051e-84	4.64851e-81	At5g64750	K09286 EREBP-like factor | (RefSeq) ERF7; ethylene-responsive transcription factor 7 (A)
GLYMA_05G186800	168	85.8933	15.5967	298.333	44.3333	-2.58314	down	1.63025e-15	8.50804e-14	--	--
GLYMA_05G188900	910	13.6633	4.45333	252.333	68.6667	-1.73075	down	9.72497e-11	3.00861e-09	At1g49210	K19040 E3 ubiquitin-protein ligase ATL10/75/76/77/78 [EC:2.3.2.27] | (RefSeq) RING-H2 finger protein ATL78 (A)
GLYMA_05G190100	1694	12.7567	1.64333	363.333	38.3333	-3.08827	down	2.48626e-19	1.85202e-17	At2g38820	--
GLYMA_05G190300	2853	6.92	3.22	306.667	124.333	-1.20219	down	8.37797e-06	0.000115701	At5g09760	K01051 pectinesterase [EC:3.1.1.11] | (RefSeq) pectinesterase (A)
GLYMA_05G191100	3783	1.07667	0.01	45	0.333333	-6.83865	down	6.01457e-08	1.27337e-06	CE29003	--
GLYMA_05G191400	3117	24.8833	12.6933	1130.67	485	-1.08721	down	3.67682e-09	9.23644e-08	At2g13690	--
GLYMA_05G191700	5775	89.73	41.4167	4227.33	1687	-1.21406	down	3.24554e-08	7.18581e-07	At1g53570	K04421 mitogen-activated protein kinase kinase kinase 3 [EC:2.7.11.25] | (RefSeq) mitogen-activated protein kinase kinase kinase 3 isoform X2 (A)
GLYMA_05G193200	5627	23.3	10.24	1768.67	674.667	-1.28619	down	1.16083e-09	3.12651e-08	At5g64030	K15449 tRNA wybutosine-synthesizing protein 1 [EC:4.1.3.44] | (RefSeq) probable methyltransferase PMT28 (A)
GLYMA_05G194000	3458	1.30333	3.09	63.6667	133	1.16894	up	0.00193722	0.0136516	At5g39450	--
GLYMA_05G194200	273	14.2667	80.0433	72.6667	370	2.41699	up	0.0013685	0.0102184	--	--
GLYMA_05G195000	1902	119.853	56.2967	3583.33	1414.33	-1.20141	down	4.77479e-13	1.91774e-11	At5g63790	--
GLYMA_05G195200	858	48.5933	12.48	852.667	180.667	-2.08651	down	6.78228e-13	2.69253e-11	At3g14880	K14431 transcription factor TGA | (RefSeq) TGA21; transcription factor TGA7 isoform X2 (A)
GLYMA_05G196700	7963	19.98	7.46333	1188.67	367	-1.54163	down	2.17955e-10	6.38615e-09	At1g34320	--
GLYMA_05G198900	971	8.65	3.34333	178	55	-1.50557	down	0.000167545	0.0016735	--	--
GLYMA_05G199400	3716	5.87	2.46	294.333	104	-1.36404	down	1.51404e-09	4.00866e-08	At5g51050	K14684 solute carrier family 25 (mitochondrial phosphate transporter), member 23/24/25/41 | (RefSeq) calcium-dependent mitochondrial ATP-magnesium/phosphate carrier protein 3 (A)
GLYMA_05G200700	13961	12.69	4.34667	741	221	-1.63949	down	1.65302e-09	4.34978e-08	At5g61980	K12489 Arf-GAP with coiled-coil, ANK repeat and PH domain-containing protein | (RefSeq) ADP-ribosylation factor GTPase-activating protein AGD3 isoform X1 (A)
GLYMA_05G201800	2070	4.36667	1.76333	177.667	62	-1.41009	down	1.92128e-06	3.06868e-05	At3g48800	K15340 DNA cross-link repair 1A protein | (RefSeq) DNA cross-link repair protein SNM1 (A)
GLYMA_05G202300	1929	0.766667	4.47667	17.6667	85.6667	2.42486	up	1.0573e-10	3.2563e-09	At5g13180	--
GLYMA_05G206200	4170	1.35333	3.25667	113	226.333	1.14404	up	0.00361348	0.0226271	At3g14260	--
GLYMA_05G207500	3574	98.7267	40.4	3954.67	1361	-1.40302	down	3.07334e-19	2.26965e-17	At5g12250	K07375 tubulin beta | (RefSeq) tubulin beta-1 chain-like (A)
GLYMA_05G209800	2390	1.13	2.5	33	62	1.03443	up	0.00645914	0.036072	At5g41380	--
GLYMA_05G211700	2864	6.21333	58.5133	262.333	2103.67	3.12835	up	2.03937e-48	9.86365e-46	At4g11280	K20772 1-aminocyclopropane-1-carboxylate synthase 1/2/6 [EC:4.4.1.14] | (RefSeq) ACS1; 1-aminocyclopropane-1-carboxylate synthase (A)
GLYMA_05G211900	1873	5.97333	2.80667	156.667	60.6667	-1.21493	down	0.00140489	0.0104289	At4g23550	K13426 WRKY transcription factor 29 | (RefSeq) probable WRKY transcription factor 29 (A)
GLYMA_05G215900	2028	34.99	175.06	1239.67	5356	2.22675	up	1.92826e-10	5.6936e-09	At4g23810	K13425 WRKY transcription factor 22 | (RefSeq) WRKY transcription factor 22 (A)
GLYMA_05G216300	1030	1.59667	0.183333	25	2.33333	-3.25928	down	0.000142615	0.00144808	--	--
GLYMA_05G220000	4493	10.65	26.44	628.667	1340	1.21354	up	2.75344e-06	4.26683e-05	At5g24320	K20241 WD repeat-containing protein 44 | (RefSeq) WD repeat-containing protein 44 (A)
GLYMA_05G221500	9237	1.31	2.96	109.667	213.333	1.08187	up	0.000130708	0.00134185	At4g12750	--
GLYMA_05G222400	1946	16.2233	1.01333	434.333	23.3333	-4.10784	down	7.86476e-45	3.33427e-42	At2g19590	K05933 aminocyclopropanecarboxylate oxidase [EC:1.14.17.4] | (RefSeq) 1-aminocyclopropane-1-carboxylate oxidase 1 (A)
GLYMA_05G223000	1870	19.5367	5.46667	617.333	144.667	-1.9444	down	2.00607e-12	7.49602e-11	At4g26200	K01762 1-aminocyclopropane-1-carboxylate synthase [EC:4.4.1.14] | (RefSeq) 1-aminocyclopropane-1-carboxylate synthase 7 (A)
GLYMA_05G224400	1934	13.35	3.32667	515.667	109.667	-2.11131	down	2.22148e-16	1.25884e-14	At2g19810	K23048 RING finger protein unkempt | (RefSeq) zinc finger CCCH domain-containing protein (A)
GLYMA_05G225300	1910	2.09333	0.68	79.6667	22	-1.72536	down	5.20455e-06	7.56104e-05	At4g29240	--
GLYMA_05G225400	3305	1.54333	0.303333	57.6667	10	-2.43444	down	1.3177e-05	0.000173799	At4g29310	--
GLYMA_05G228100	2917	1.63667	0.24	94.6667	11.6667	-2.89223	down	5.08301e-12	1.79949e-10	At5g11590	K09286 EREBP-like factor | (RefSeq) DNA-binding domain-containing protein (A)
GLYMA_05G230400	1204	14.5533	6.01	267.333	92.6667	-1.3917	down	1.90976e-08	4.375e-07	At1g52250	K10418 dynein light chain LC8-type | (RefSeq) dynein light chain type 1-like protein (A)
GLYMA_05G231100	3397	0.133333	0.953333	5.66667	34	2.71266	up	3.30059e-06	5.01725e-05	At4g13260	K11816 indole-3-pyruvate monooxygenase [EC:1.14.13.168] | (RefSeq) indole-3-pyruvate monooxygenase YUCCA2 (A)
GLYMA_05G234600	1973	2.63	13.6967	80.3333	352.333	2.26816	up	1.48304e-14	7.09298e-13	At1g68320	K09422 transcription factor MYB, plant | (RefSeq) MYB84; MYB transcription factor MYB84 (A)
GLYMA_05G235200	3292	2.13333	5.48	77	169.333	1.25074	up	1.80364e-05	0.000231195	At2g01660	--
GLYMA_05G235500	3886	117.37	53.8	6392.33	2468.67	-1.23837	down	6.69514e-13	2.66101e-11	At1g70700	K13464 jasmonate ZIM domain-containing protein | (RefSeq) protein TIFY 6B isoform X1 (A)
GLYMA_05G236800	3403	4.89333	0.516667	196	17.6667	-3.3502	down	6.2801e-26	7.43651e-24	At1g23200	K01051 pectinesterase [EC:3.1.1.11] | (RefSeq) pectinesterase 2 (A)
GLYMA_05G237200	4459	4.09333	12.5667	158.667	426.667	1.53649	up	2.22577e-06	3.51254e-05	At1g73800	--
GLYMA_05G238100	1628	39.5567	86.7333	839.667	1525	1.01553	up	7.71153e-05	0.000846051	At2g01670	K07766 diphosphoinositol-polyphosphate diphosphatase [EC:3.6.1.52] | (RefSeq) nudix hydrolase 17, mitochondrial isoform X2 (A)
GLYMA_05G238200	543	15.26	5.69667	170.333	52	-1.54434	down	2.7641e-06	4.28143e-05	At1g67920	--
GLYMA_05G239400	3392	8.00667	3.46667	384.667	141.333	-1.31863	down	3.54083e-09	8.91438e-08	At1g68050	K12116 flavin-binding kelch repeat F-box protein 1 | (RefSeq) FKF1; circadian clock-associated FKF1 (A)
GLYMA_05G240500	2856	7.82	3.80333	311.667	129.333	-1.14592	down	4.59626e-07	8.24207e-06	At1g67970	K09419 heat shock transcription factor, other eukaryote | (RefSeq) HSF-14; heat stress transcription factor 14 (A)
GLYMA_05G241600	8011	4.72667	10.75	464	920.333	1.08939	up	9.05921e-06	0.000123892	At5g35750	K14489 arabidopsis histidine kinase 2/3/4 (cytokinin receptor) [EC:2.7.13.3] | (RefSeq) histidine kinase 4 (A)
GLYMA_05G245600	1031	683.97	242.163	14680.3	4217.33	-1.62478	down	3.0331e-10	8.76004e-09	--	K13448 calcium-binding protein CML | (RefSeq) calcium-binding EF-hand family protein (A)
GLYMA_05G245700	4893	1.54	0.283333	156	23.3333	-2.57619	down	1.96019e-12	7.34859e-11	--	K22390 acid phosphatase type 7 | (RefSeq) probable inactive purple acid phosphatase 27 (A)
GLYMA_05G247900	2850	6.14	2.11333	312	90.3333	-1.6496	down	6.33331e-06	8.98702e-05	At3g17790	K14379 tartrate-resistant acid phosphatase type 5 [EC:3.1.3.2] | (RefSeq) purple acid phosphatase 17-like (A)
GLYMA_06G004200	1021	1.95333	0.436667	41	7.66667	-2.26695	down	0.000251175	0.00238533	At4g08950	--
GLYMA_06G004300	985	6.96333	0.576667	142	9.66667	-3.71459	down	5.00454e-17	2.98361e-15	At4g34950	--
GLYMA_06G004800	1518	10.1067	23.9	314	612	1.11776	up	6.57471e-06	9.30155e-05	At4g38690	--
GLYMA_06G006000	819	1.28333	0.07	20	1	-4.24442	down	0.000124386	0.00128425	At4g34800	K14488 SAUR family protein | (RefSeq) auxin-responsive protein SAUR21 (A)
GLYMA_06G009100	1968	1.56667	0.15	48.6667	3.66667	-3.5567	down	8.55521e-08	1.77086e-06	At1g75540	--
GLYMA_06G009500	4030	0.266667	0.843333	17	45.3333	1.53864	up	0.00213984	0.0148812	At2g16400	--
GLYMA_06G012200	2514	0.646667	1.84	26.3333	63.3333	1.40043	up	8.416e-05	0.000910254	At4g34530	K23050 phenylcoumaran benzylic ether reductase [EC:1.3.1.-] | (RefSeq) eugenol synthase 1 (A)
GLYMA_06G012500	1909	2.80667	6.34	103	204.667	1.08668	up	0.000267135	0.00251533	At1g19440	K15397 3-ketoacyl-CoA synthase [EC:2.3.1.199] | (RefSeq) 3-ketoacyl-CoA synthase 4 (A)
GLYMA_06G013300	919	83.7033	30.63	1258.33	371.333	-1.58116	down	2.86722e-07	5.36276e-06	--	--
GLYMA_06G015200	1035	9.3	3.12333	190.333	55	-1.67778	down	1.19309e-09	3.20584e-08	At1g76410	K19040 E3 ubiquitin-protein ligase ATL10/75/76/77/78 [EC:2.3.2.27] | (RefSeq) RING-H2 finger protein (A)
GLYMA_06G017800	4702	3.85333	2.03333	276.667	124.333	-1.02551	down	6.06739e-05	0.000686504	At1g20640	--
GLYMA_06G019100	1447	0.466667	2.18	12.3333	53.3333	2.17973	up	8.26217e-05	0.000898141	At1g76240	--
GLYMA_06G020800	1794	21.04	130.013	768.667	3945.67	2.51003	up	1.37569e-25	1.58527e-23	At1g76070	--
GLYMA_06G020900	2930	22.78	78.68	1334	3896.67	1.67932	up	1.77156e-22	1.66217e-20	At1g20300	--
GLYMA_06G021400	1474	7.35	3.39	216.667	83.6667	-1.22681	down	0.000125345	0.00129299	At5g42200	K19037 E3 ubiquitin-protein ligase ATL23 [EC:2.3.2.27] | (RefSeq) E3 ubiquitin-protein ligase ATL23 (A)
GLYMA_06G023900	3622	2.51	5.85	97.6667	196	1.11581	up	0.000141199	0.00143627	At1g20030	K12173 BRCA1-A complex subunit BRE | (RefSeq) BRISC and BRCA1-A complex member 2 (A)
GLYMA_06G025200	2904	42.7933	12.6367	1390.33	340	-1.87779	down	2.48198e-19	1.85202e-17	At3g53450	K22522 cytokinin riboside 5'-monophosphate phosphoribohydrolase [EC:3.2.2.-] | (RefSeq) cytokinin riboside 5'-monophosphate phosphoribohydrolase LOG1 (A)
GLYMA_06G028500	852	5.28333	1.37	90.6667	19.6667	-2.06361	down	1.51681e-08	3.51466e-07	At1g75460	--
GLYMA_06G029100	5240	31.3233	14.65	2572	1014	-1.20717	down	1.29002e-12	4.96074e-11	At1g75410	--
GLYMA_06G031000	1283	197.637	13.64	3742.33	211.333	-3.98079	down	1.57686e-30	2.66745e-28	At1g19530	--
GLYMA_06G031100	1153	49.7467	3.23	796.667	43	-4.06063	down	9.93407e-45	4.1602e-42	At1g19530	--
GLYMA_06G033000	759	0.73	2.43667	12	31.3333	1.57165	up	0.0080023	0.0425254	At5g19650	--
GLYMA_06G035300	4137	103.777	8.47667	4160.33	283.667	-3.72959	down	7.10359e-90	2.43937e-86	At4g31940	K23136 fraxetin 5-hydroxylase [EC:1.14.14.164] | (RefSeq) xanthotoxin 5-hydroxylase CYP82C4 (A)
GLYMA_06G035400	3693	0.506667	0.123333	27.3333	5.66667	-2.14209	down	0.000485789	0.00421902	At4g31940	K23136 fraxetin 5-hydroxylase [EC:1.14.14.164] | (RefSeq) xanthotoxin 5-hydroxylase CYP82C4 (A)
GLYMA_06G036800	1530	14.81	85.99	461.333	2225.67	2.41636	up	7.90842e-35	1.775e-32	At2g23290	K09422 transcription factor MYB, plant | (RefSeq) MYB50; MYB transcription factor MYB50 (A)
GLYMA_06G037300	9501	3.11	1.42333	85	32.3333	-1.24977	down	0.000211173	0.00204966	At2g26540	K01719 uroporphyrinogen-III synthase [EC:4.2.1.75] | (RefSeq) uroporphyrinogen-III synthase, chloroplastic isoform X1 (A)
GLYMA_06G042000	198	23.2067	4.22333	94.6667	14	-2.5885	down	1.8626e-09	4.8677e-08	--	--
GLYMA_06G042100	1391	78.7767	9.14667	2248.33	213.667	-3.22676	down	2.51912e-31	4.43623e-29	At1g46768	K09286 EREBP-like factor | (RefSeq) DREB2; dehydration-responsive element binding protein 2 (A)
GLYMA_06G042200	907	4.63667	0.326667	85.3333	5	-3.93819	down	1.84541e-13	7.81397e-12	At4g36830	--
GLYMA_06G043400	1839	19.3067	9.02667	721.667	281.333	-1.21452	down	1.92327e-09	5.01862e-08	At4g24210	K14495 F-box protein GID2 | (RefSeq) F-box protein GID2 (A)
GLYMA_06G043600	339	3.62667	0.63	24.3333	3.66667	-2.61422	down	0.000159105	0.00160084	--	--
GLYMA_06G045100	3091	5.02	14.2967	315.667	751.667	1.3945	up	6.15095e-08	1.30064e-06	At5g67360	--
GLYMA_06G045700	1092	0.856667	3.67333	18.6667	65	1.95946	up	1.62682e-06	2.63639e-05	At5g43190	--
GLYMA_06G046200	2452	0.38	2.11667	15	71.6667	2.38404	up	8.41359e-08	1.7426e-06	At4g37630	K18811 cyclin D5, plant | (RefSeq) cyclin-D5-1 isoform X1 (A)
GLYMA_06G050300	1598	13.27	3.81	438	103	-1.92648	down	2.55729e-13	1.06704e-11	At2g25900	K23048 RING finger protein unkempt | (RefSeq) zinc finger CCCH domain-containing protein (A)
GLYMA_06G050600	6943	21.28	10.5967	1045.33	441.333	-1.11658	down	6.99568e-09	1.69296e-07	At1g55340	--
GLYMA_06G051500	4728	67.3133	6.94	2113.67	181.667	-3.39145	down	9.59936e-63	9.41834e-60	At5g11790	K18266 protein NDRG1 | (RefSeq) uncharacterized protein LOC100803300 (A)
GLYMA_06G051900	1729	24.7367	3.42667	589	69.3333	-2.96567	down	3.44745e-30	5.7191e-28	At5g56840	--
GLYMA_06G052000	4519	4.03333	9.25333	324	639.333	1.095	up	4.75707e-08	1.0229e-06	At1g10970	K14709 solute carrier family 39 (zinc transporter), member 1/2/3 | (RefSeq) zinc transporter 4, chloroplastic isoform X2 (A)
GLYMA_06G052900	5092	30.8833	15.7867	1259.67	543	-1.08012	down	1.07582e-10	3.31036e-09	At1g14560	K14684 solute carrier family 25 (mitochondrial phosphate transporter), member 23/24/25/41 | (RefSeq) mitochondrial adenine nucleotide transporter ADNT1 (A)
GLYMA_06G053200	3400	18.4333	9.94667	891.333	401	-1.00535	down	1.3111e-07	2.61763e-06	At3g13920	K03257 translation initiation factor 4A | (RefSeq) eukaryotic initiation factor 4A-2 (A)
GLYMA_06G053400	2098	4.71	1.07	99.3333	18.3333	-2.27711	down	5.92798e-07	1.03639e-05	--	--
GLYMA_06G053500	1497	3.20667	1.14	35.3333	10	-1.63159	down	0.00747658	0.0403561	--	--
GLYMA_06G055200	1871	1.35	2.96667	50.3333	93.6667	1.02847	up	0.000505891	0.00436929	At1g54200	--
GLYMA_06G058400	858	4.04	22.3433	73	324.667	2.3269	up	3.6352e-13	1.495e-11	At1g74930	K09286 EREBP-like factor | (RefSeq) ethylene-responsive transcription factor ERF023 (A)
GLYMA_06G059500	1036	1.57	0.08	32	1.33333	-4.46338	down	4.0536e-07	7.36122e-06	At5g24920	--
GLYMA_06G060000	1625	23.4133	51.5033	762	1410.33	1.02567	up	1.70164e-06	2.74726e-05	At5g10750	--
GLYMA_06G061600	5666	1.54	3.34333	123.333	232.333	1.02255	up	0.000220317	0.00212758	At3g18090	K16252 DNA-directed RNA polymerase IV and V subunit 2 [EC:2.7.7.6] | (RefSeq) DNA-directed RNA polymerases IV and V subunit 2 (A)
GLYMA_06G061800	3064	3.20333	1.67333	119.333	53.3333	-1.04315	down	0.000512024	0.00440828	At4g31800_2	--
GLYMA_06G062100	3036	64.1167	12.5933	3894	646.667	-2.4602	down	9.86067e-48	4.70299e-45	At5g25110	K07198 5'-AMP-activated protein kinase, catalytic alpha subunit [EC:2.7.11.11] | (RefSeq) CBL-interacting protein kinase 2 (A)
GLYMA_06G063500	5059	9.42333	20.31	537.667	993	1.0029	up	1.50248e-05	0.000195585	At2g25180	K14491 two-component response regulator ARR-B family | (RefSeq) two-component response regulator ARR12 (A)
GLYMA_06G064000	1507	2.42667	0.806667	59	16.6667	-1.69871	down	1.92189e-05	0.000244526	At5g25190	K09286 EREBP-like factor | (RefSeq) ethylene-responsive transcription factor 3 (A)
GLYMA_06G064700	4479	0.346667	1.06	15.3333	39.6667	1.50248	up	0.00139846	0.0103901	At2g34190	K23717 solute carrier family 23 (nucleobase transporter), member 2 | (RefSeq) nucleobase-ascorbate transporter 4 (A)
GLYMA_06G065200	3089	3.82667	1.97333	88	39.6667	-1.04005	down	0.0092257	0.0476402	At5g25220	--
GLYMA_06G065300	670	4.15	0.77	54.3333	8.66667	-2.52713	down	5.40509e-07	9.51363e-06	At5g11060	--
GLYMA_06G068000	3722	1.42667	7.06333	77.3333	321.333	2.19635	up	5.4787e-13	2.19532e-11	At3g11760	--
GLYMA_06G068100	3397	3.03333	15.0533	201.667	863.333	2.21737	up	1.2921e-21	1.14653e-19	At4g32300	K13416 brassinosteroid insensitive 1-associated receptor kinase 1 [EC:2.7.10.1 2.7.11.1] | (RefSeq) BRASSINOSTEROID INSENSITIVE 1-associated receptor kinase 1 (A)
GLYMA_06G068500	4223	4.02667	2.15	113.333	49.6667	-1.03085	down	0.0030803	0.019928	At5g25360	--
GLYMA_06G069700	3506	1.43667	3.34333	54.6667	105	1.09153	up	0.00170296	0.0122804	At5g11270	--
GLYMA_06G071800	7965	1.04333	2.40333	94.6667	193	1.12094	up	0.000236477	0.00226453	At1g15520	K05681 ATP-binding cassette, subfamily G (WHITE), member 2 | (RefSeq) ABC transporter G family member 21 (A)
GLYMA_06G071900	3336	10.6033	4.74667	422.333	158.333	-1.2769	down	5.28495e-10	1.48758e-08	At2g25620	K14803 protein phosphatase PTC2/3 [EC:3.1.3.16] | (RefSeq) probable protein phosphatase 2C 22 isoform X1 (A)
GLYMA_06G073000	3345	2.99	1.48	147.667	62	-1.11886	down	1.98684e-05	0.000252323	At5g25510	K11584 serine/threonine-protein phosphatase 2A regulatory subunit B' | (RefSeq) serine/threonine protein phosphatase 2A 57 kDa regulatory subunit B' kappa isoform (A)
GLYMA_06G077200	1606	130.4	44.88	3540.33	993	-1.66666	down	2.33938e-09	6.04927e-08	At5g24890	--
GLYMA_06G079200	1086	17.0367	5.53333	385.333	102	-1.74912	down	8.46829e-09	2.02932e-07	At4g31320	K14488 SAUR family protein | (RefSeq) auxin-responsive protein SAUR50 (A)
GLYMA_06G081300	4581	0.6	0.0966667	34.6667	4.66667	-2.75143	down	5.08847e-05	0.000587767	At5g25620	K11816 indole-3-pyruvate monooxygenase [EC:1.14.13.168] | (RefSeq) indole-3-pyruvate monooxygenase YUCCA6 (A)
GLYMA_06G082000	5079	97.1067	48.1867	4665.33	1937.67	-1.12229	down	5.72709e-10	1.60677e-08	At2g25740_1	--
GLYMA_06G082400	5063	69.53	34.8167	2738	1176.67	-1.10538	down	2.57288e-09	6.59349e-08	At5g11520	K14454 aspartate aminotransferase, cytoplasmic [EC:2.6.1.1] | (RefSeq) AAT; aspartate aminotransferase glyoxysomal isozyme AAT1 precursor (A)
GLYMA_06G084300	6037	96.5167	43.4067	4418.33	1669	-1.26331	down	2.01986e-10	5.9526e-09	At4g28880	K08960 casein kinase 1, epsilon [EC:2.7.11.1] | (RefSeq) casein kinase I isoform X1 (A)
GLYMA_06G084400	4247	1.03667	2.57667	60.3333	131.667	1.2282	up	5.2813e-05	0.000607978	At5g43870	--
GLYMA_06G086800	5268	0.836667	1.98	79	164.667	1.16123	up	0.000424472	0.00375632	At2g25790	K00924 kinase [EC:2.7.1.-] | (RefSeq) NARK; nodule autoregulation receptor kinase precursor (A)
GLYMA_06G087400	877	3.31333	1.20667	61	18	-1.59607	down	0.00158502	0.0115512	At4g32860	--
GLYMA_06G088600	7063	24.76	10.85	1182.67	453.333	-1.28808	down	6.51329e-08	1.36883e-06	At5g56630	K00850 6-phosphofructokinase 1 [EC:2.7.1.11] | (RefSeq) ATP-dependent 6-phosphofructokinase 6 (A)
GLYMA_06G091900	1964	4.31333	1.24	124.667	30.3333	-1.91626	down	3.50087e-07	6.42543e-06	At5g65660	--
GLYMA_06G093400	2546	3.95333	2.06667	192	89	-1.02732	down	0.00199871	0.0140187	At5g49700	--
GLYMA_06G097100	10401	3.87667	8.28667	268.667	496.667	1.00115	up	7.54051e-06	0.000105218	At1g58220	--
GLYMA_06G097400	3596	2.19333	5.38667	68.6667	144.333	1.19888	up	2.71345e-05	0.000333858	At1g09700	--
GLYMA_06G099500	1274	2.17	0.746667	58	16.3333	-1.66192	down	0.00758458	0.0408492	--	--
GLYMA_06G101400	1429	13.98	7.47333	394.667	181.667	-1.00994	down	0.000112839	0.00117492	At1g78310	--
GLYMA_06G101600	10364	128.293	54.88	9404.33	3394.33	-1.33272	down	1.09998e-13	4.76936e-12	At1g78280	--
GLYMA_06G102000	1483	33.71	131.68	976.667	3286	1.86636	up	8.44134e-14	3.72591e-12	At4g08950	--
GLYMA_06G102400	5120	3.29667	7.48	174	349.667	1.09019	up	0.0011244	0.0086593	At1g78260	K25006 RNA-binding protein 24/38 | (RefSeq) RNA-binding protein 38 (A)
GLYMA_06G102900	7781	3.22333	1.66667	311.333	137.333	-1.05095	down	4.51267e-05	0.000528711	At1g22310	--
GLYMA_06G104700	1606	2.89333	1.19667	93.3333	32.6667	-1.39034	down	9.80836e-05	0.00104085	At1g78110	--
GLYMA_06G104800	3176	9.75667	1.32	425	48.3333	-2.99433	down	5.10176e-24	5.34129e-22	At5g65140	K01087 trehalose 6-phosphate phosphatase [EC:3.1.3.12] | (RefSeq) probable trehalose-phosphate phosphatase J isoform X2 (A)
GLYMA_06G105000	3456	55.7	26.79	3924.33	1563	-1.17126	down	7.32268e-09	1.76767e-07	At1g78080	K09286 EREBP-like factor | (RefSeq) ethylene-responsive transcription factor RAP2-4 (A)
GLYMA_06G107300	5278	1.4	0.643333	73.6667	28.6667	-1.22628	down	0.000454116	0.0039812	At1g22070	K14431 transcription factor TGA | (RefSeq) TGA09; transcription factor TGA3 isoform X1 (A)
GLYMA_06G109200	4681	14.9033	3.09	892.667	164.667	-2.35656	down	1.02694e-12	3.98026e-11	At1g77760_1	K10534 nitrate reductase (NAD(P)H) [EC:1.7.1.1 1.7.1.2 1.7.1.3] | (RefSeq) INR2; inducible nitrate reductase [NADH] 2 (A)
GLYMA_06G111100	2379	12.3733	4.79	440	142.667	-1.48327	down	2.89022e-11	9.48853e-10	At1g77660	--
GLYMA_06G111300	1883	12.9933	6.29	490.333	199.667	-1.15969	down	4.08716e-07	7.41432e-06	At1g77640	K09286 EREBP-like factor | (RefSeq) ethylene-responsive transcription factor ERF010 (A)
GLYMA_06G111600	5025	2.69667	8.29333	98.3333	241.667	1.49827	up	0.00237239	0.0161771	At4g08290	--
GLYMA_06G113600	2531	11.2733	5.40333	129.667	50.6667	-1.18458	down	0.00108417	0.00838713	At1g21720	K02735 20S proteasome subunit beta 3 [EC:3.4.25.1] | (RefSeq) putative proteasome beta subunit C1 (A)
GLYMA_06G114200	3206	8.03667	47.1333	265	1305	2.44253	up	9.96695e-29	1.39132e-26	At1g44130	K22683 aspartyl protease family protein [EC:3.4.23.-] | (RefSeq) aspartyl protease family protein 2 (A)
GLYMA_06G114300	4048	110.17	59.4667	4724.67	2072.67	-1.0142	down	6.40287e-05	0.000719014	At1g44170	K00128 aldehyde dehydrogenase (NAD+) [EC:1.2.1.3] | (RefSeq) ALDH3H2; aldehyde dehydrogenase family 3 member H2 (A)
GLYMA_06G114500	915	9.41	3.72333	108.333	35.6667	-1.45542	down	4.05908e-06	6.03938e-05	--	--
GLYMA_06G122600	3294	419.293	35.4033	14537.7	1041.67	-3.67777	down	4.51492e-108	2.21489e-104	At1g77120	K18857 alcohol dehydrogenase class-P [EC:1.1.1.1] | (RefSeq) alcohol dehydrogenase 1 isoform X2 (A)
GLYMA_06G122700	3960	20.9533	2.83333	925.333	106.667	-2.99264	down	1.624e-54	1.11536e-51	At1g48880	K23877 xyloglucan O-acetyltransferase | (RefSeq) protein ALTERED XYLOGLUCAN 4 (A)
GLYMA_06G125600	2175	15.71	50.2833	555.667	1484	1.56709	up	4.39523e-08	9.51054e-07	At4g23810	K13425 WRKY transcription factor 22 | (RefSeq) WRKY10; WRKY transcription factor 10 (A)
GLYMA_06G128700	7194	15.8233	2.54667	1754.33	232.333	-2.75463	down	5.73052e-23	5.60644e-21	At5g24270	K06268 serine/threonine-protein phosphatase 2B regulatory subunit | (RefSeq) calcineurin B-like protein 4 isoform X2 (A)
GLYMA_06G129300	5049	0.493333	1.26	21.6667	46.6667	1.23426	up	0.00197217	0.013858	At3g49260	--
GLYMA_06G129800	2349	0.7	6.82333	14.6667	119	3.16516	up	1.2039e-17	7.59962e-16	At5g53030	--
GLYMA_06G131400	5135	2.39	1.01333	197.333	71.3333	-1.34309	down	1.58828e-07	3.12201e-06	At5g24320	K20241 WD repeat-containing protein 44 | (RefSeq) uncharacterized protein LOC100806747 isoform X2 (A)
GLYMA_06G132500	4061	620.743	152.56	25962.3	5329	-2.13932	down	1.34303e-37	3.57517e-35	At1g64650	K24175 MFS transporter, MFS domain-containing protein family, molybdate-anion transporter | (RefSeq) molybdate-anion transporter isoform X2 (A)
GLYMA_06G132600	2690	6.22667	1.77667	199.333	46.6667	-1.93307	down	1.27137e-09	3.39759e-08	At4g27700	--
GLYMA_06G133300	2598	117.877	60.58	3000.33	1282.33	-1.08067	down	6.34591e-08	1.33692e-06	At5g53560	K23490 cytochrome b5 | (RefSeq) CB5-A2; cytochrome b5 (A)
GLYMA_06G134900	5151	0.633333	1.92667	54.3333	136	1.47444	up	2.54933e-06	3.97025e-05	At4g27670	K13993 HSP20 family protein | (RefSeq) uncharacterized protein LOC100798019 (A)
GLYMA_06G135000	1431	9.15	4.09333	275	99.6667	-1.29487	down	0.00022797	0.00219347	At5g03890	--
GLYMA_06G135900	874	44.6433	154.2	807.667	2271.33	1.6641	up	4.1826e-11	1.33859e-09	--	--
GLYMA_06G136200	2440	61.6067	282.17	2289.67	8741.67	2.08044	up	2.32389e-24	2.54959e-22	At1g64720	--
GLYMA_06G136300	455	20.2967	129.343	177	995.333	2.58625	up	0.000484254	0.00420781	--	--
GLYMA_06G136500	2289	1.1	2.54333	40	78	1.0943	up	0.000740261	0.00602383	At5g24490	--
GLYMA_06G136600	4750	15.3433	8.17667	1061.67	478	-1.01469	down	5.85836e-07	1.02641e-05	At5g24470	K12130 pseudo-response regulator 5 | (RefSeq) two-component response regulator-like PRR95 (A)
GLYMA_06G138100	3357	85.97	249.88	4044.33	9796.67	1.42652	up	3.07099e-14	1.4061e-12	At4g35580	--
GLYMA_06G140700	1310	0.97	9.81333	24.3333	217.667	3.2713	up	5.28518e-23	5.20038e-21	--	--
GLYMA_06G142000	2889	12.51	46.8267	405.667	1270.33	1.79389	up	3.75553e-16	2.07339e-14	At3g56400	K13425 WRKY transcription factor 22 | (RefSeq) WRKY transcription factor 22 (A)
GLYMA_06G142200	905	12.27	5.43667	230.333	82.6667	-1.30363	down	0.000400739	0.00357433	--	--
GLYMA_06G142900	1540	3.15667	7.67667	97	199.667	1.17487	up	3.845e-07	7.01208e-06	At5g05250	--
GLYMA_06G144000	1104	32.4133	91.6433	700.333	1713	1.40414	up	1.70045e-06	2.74663e-05	--	--
GLYMA_06G147100	3530	0.653333	1.79667	15.6667	35.6667	1.33828	up	0.00863756	0.045133	At5g26170	K18835 WRKY transcription factor 2 | (RefSeq) probable WRKY transcription factor 20 (A)
GLYMA_06G148400	2212	31.0167	0.363333	1000.33	10	-6.51761	down	3.34416e-87	8.83372e-84	At5g64750	K09286 EREBP-like factor | (RefSeq) ERF5; ethylene-responsive transcription factor RAP2-3-like (A)
GLYMA_06G149900	2580	29.7467	11.0033	1435.67	446	-1.54057	down	1.13142e-10	3.46593e-09	At1g76880	--
GLYMA_06G154400	1428	2.05333	0.556667	42	9.33333	-2.00761	down	0.000428376	0.00378744	At5g64530	--
GLYMA_06G156200	4943	0.373333	1.01	21.6667	53.6667	1.37366	up	0.00695679	0.0382601	At2g01170	K18875 enhanced disease susceptibility 1 protein | (RefSeq) uncharacterized protein LOC100778851 (A)
GLYMA_06G156300	6621	0.116667	0.646667	6	30.6667	2.46068	up	8.85214e-05	0.000952027	At3g52430	K18875 enhanced disease susceptibility 1 protein | (RefSeq) uncharacterized protein LOC100778851 (A)
GLYMA_06G156600	6749	26.3333	9.51667	2059.33	632	-1.5795	down	1.70094e-19	1.29783e-17	At1g77380	K24917 amino acid permease | (RefSeq) amino acid permease 3 isoform X1 (A)
GLYMA_06G158900	2758	8.84667	3.57333	360.667	119.667	-1.43003	down	7.06278e-08	1.47708e-06	--	K13173 arginine and glutamate-rich protein 1 | (RefSeq) uncharacterized protein At1g10890 (A)
GLYMA_06G166500	1860	0.18	2.18667	4.66667	44.3333	3.39617	up	4.02411e-08	8.77942e-07	At5g13180	--
GLYMA_06G168100	3108	2.95667	1.41667	93	37.3333	-1.16907	down	0.00168197	0.0121546	At1g08510	K10781 fatty acyl-ACP thioesterase B [EC:3.1.2.14 3.1.2.21] | (RefSeq) palmitoyl-acyl carrier protein thioesterase, chloroplastic isoform X1 (A)
GLYMA_06G168300	2472	5.09333	11.3133	153.667	288.667	1.04092	up	0.00164431	0.0119151	At5g63530	K07213 copper chaperone | (RefSeq) copper chaperone homolog CCH (A)
GLYMA_06G170100	1629	10.22	1.48333	293.667	36	-2.89172	down	6.23448e-22	5.66381e-20	At1g67340	--
GLYMA_06G171100	1556	16.3967	70.5933	532.667	1856	1.97771	up	3.2816e-13	1.35771e-11	--	K13448 calcium-binding protein CML | (RefSeq) calcium-binding protein CML38-like (A)
GLYMA_06G174700	2681	0.843333	2.08	26.6667	57	1.2156	up	0.00265134	0.0176688	At5g63180	K01728 pectate lyase [EC:4.2.2.2] | (RefSeq) probable pectate lyase 5 (A)
GLYMA_06G175100	2316	9.83333	35.0633	452.333	1370.67	1.73322	up	1.06803e-13	4.63669e-12	At2g31880	K13415 protein brassinosteroid insensitive 1 [EC:2.7.10.1 2.7.11.1] | (RefSeq) BRI1B; brassinosteroid receptor precursor (A)
GLYMA_06G182500	1520	6.18333	2.49667	190	64	-1.42208	down	1.38999e-07	2.76708e-06	At5g62770	--
GLYMA_06G184300	1402	30.7233	7.71	878.333	183.333	-2.11213	down	1.74669e-23	1.76936e-21	At5g62860_2	--
GLYMA_06G186200	711	79.78	41.5067	1198	499	-1.08069	down	0.00182867	0.0130392	At1g19020	--
GLYMA_06G189700	5563	4.56333	2.23	181.667	74	-1.15386	down	1.37663e-05	0.000180295	At3g47940	K09510 DnaJ homolog subfamily B member 4 | (RefSeq) dnaJ homolog subfamily B member 1 (A)
GLYMA_06G191400	9755	14.0267	7.03	990.667	419.333	-1.1006	down	1.96786e-05	0.000250005	At3g47780	K05643 ATP-binding cassette, subfamily A (ABC1), member 3 | (RefSeq) ABC transporter A family member 1 (A)
GLYMA_06G191800	2808	5.54	12.3267	69.6667	135.667	1.05523	up	0.00181506	0.0129583	At1g74500	--
GLYMA_06G192700	2833	5.33333	13.0233	98	195.333	1.15806	up	0.000153477	0.00154693	At1g74520	K17279 receptor expression-enhancing protein 5/6 | (RefSeq) uncharacterized protein LOC100527841 (A)
GLYMA_06G194800	3336	3.89667	1.61667	176	61	-1.38452	down	8.45803e-07	1.43502e-05	At3g47500	--
GLYMA_06G195100	2030	52.1333	12.6133	1827.33	368.333	-2.16541	down	4.92769e-26	5.89606e-24	At1g08570	K03671 thioredoxin 1 | (RefSeq) thioredoxin-like superfamily protein (A)
GLYMA_06G195500	2091	16.9267	8.68667	613	260	-1.08011	down	7.72616e-06	0.00010759	At5g61430	--
GLYMA_06G196700	2157	1.32333	3.13333	55.6667	115	1.14973	up	0.000318795	0.00293339	At5g61340	--
GLYMA_06G201100	2466	0.1	0.53	4.66667	22	2.3547	up	0.000558027	0.00474558	At5g58430	K07195 exocyst complex component 7 | (RefSeq) exocyst complex component EXO70B1 (A)
GLYMA_06G201600	7610	36.5967	17.88	1054.33	427	-1.15132	down	1.42933e-08	3.32767e-07	At5g07910	--
GLYMA_06G203900	2882	0.716667	2.21	41.6667	107.333	1.51372	up	7.56644e-06	0.000105537	At5g61010	K07195 exocyst complex component 7 | (RefSeq) exocyst complex component EXO70E2 (A)
GLYMA_06G206400	973	0.37	2.19333	6.66667	34	2.46988	up	1.17057e-05	0.000156715	At5g60850	--
GLYMA_06G208100	5983	4.16333	1.89667	141	55.3333	-1.23121	down	0.000115894	0.00120247	At1g18490	K23953 plant cysteine oxidase [EC:1.13.11.-] | (RefSeq) plant cysteine oxidase 3 isoform X1 (A)
GLYMA_06G213000	1720	7.17	2.78	252	81.3333	-1.48403	down	1.21347e-07	2.43831e-06	At5g19970	--
GLYMA_06G215200	6033	0.346667	1.54333	13.6667	53.6667	2.0851	up	1.0679e-05	0.000143923	At2g26710	K15639 PHYB activation tagged suppressor 1 [EC:1.14.-.-] | (RefSeq) cytochrome P450 734A1 (A)
GLYMA_06G216800	5602	85.82	43.1567	3167	1330.33	-1.10652	down	2.78367e-11	9.15625e-10	At2g26830	K00894 ethanolamine kinase [EC:2.7.1.82] | (RefSeq) probable ethanolamine kinase (A)
GLYMA_06G220200	4415	5.32667	2.09667	346.667	114.333	-1.45591	down	1.39798e-06	2.28713e-05	At2g24130	K13420 LRR receptor-like serine/threonine-protein kinase FLS2 [EC:2.7.11.1] | (RefSeq) probable LRR receptor-like serine/threonine-protein kinase At3g47570 (A)
GLYMA_06G220700	2369	21.1533	10.3333	620.333	248.333	-1.15313	down	5.69995e-05	0.000649424	At5g20230	--
GLYMA_06G226700	14584	5.6	2.16667	378.667	124.333	-1.47484	down	5.15594e-09	1.27195e-07	At1g53430	K13416 brassinosteroid insensitive 1-associated receptor kinase 1 [EC:2.7.10.1 2.7.11.1] | (RefSeq) somatic embryogenesis receptor-like kinase-like protein precursor (A)
GLYMA_06G227700	1925	0.81	2.06	29.6667	67	1.27217	up	0.00683866	0.0378116	At1g53330	K20291 conserved oligomeric Golgi complex subunit 4 | (RefSeq) LOW QUALITY PROTEIN: conserved oligomeric Golgi complex subunit 4-like (A)
GLYMA_06G229400	3966	5.06333	1.93	200.333	64.6667	-1.5049	down	3.31704e-08	7.32523e-07	At1g28200	--
GLYMA_06G239500	2035	2.99667	11.96	124.667	411.333	1.87355	up	9.45721e-16	5.03952e-14	At2g18570	K12356 coniferyl-alcohol glucosyltransferase [EC:2.4.1.111] | (RefSeq) anthocyanidin 3-O-glucosyltransferase 5 (A)
GLYMA_06G244800	3394	2.12333	6.26333	140.667	360.333	1.46668	up	1.14214e-10	3.49565e-09	At4g21700	--
GLYMA_06G247100	3317	0.103333	0.52	4	16	2.15135	up	0.00476987	0.0282702	At5g54190	K00218 protochlorophyllide reductase [EC:1.3.1.33] | (RefSeq) protochlorophyllide reductase, chloroplastic (A)
GLYMA_06G248900	2368	86.4	18.1	3174.67	546.333	-2.37384	down	1.77068e-24	1.95515e-22	At3g15500	--
GLYMA_06G249300	6136	1.53667	0.443333	58.6667	14.3333	-1.89969	down	1.31857e-05	0.000173819	At3g15520	--
GLYMA_06G249400	1543	2.15667	0.86	68	22.6667	-1.44044	down	0.00298181	0.0194151	At3g15530	--
GLYMA_06G254300	3710	4.60333	1.12	326.667	68.3333	-2.13922	down	2.28723e-18	1.54918e-16	At3g14470	K13457 disease resistance protein RPM1 | (RefSeq) disease resistance protein RPM1 (A)
GLYMA_06G255700	354	1.4	6.53	9.33333	33.6667	2.04857	up	0.000927315	0.00733563	At4g27280	K24345 calcium-binding protein KIC and related proteins | (RefSeq) calcium-binding protein KRP1 (A)
GLYMA_06G258500	5485	0.926667	2.42333	53.3333	115.667	1.27133	up	0.000115249	0.00119747	At4g21380	K13430 serine/threonine-protein kinase PBS1 [EC:2.7.11.1] | (RefSeq) probable serine/threonine-protein kinase PBL7 isoform X1 (A)
GLYMA_06G259400	11303	0.386667	1.43	32.3333	100	1.77018	up	0.000234432	0.0022506	At5g17680	K13457 disease resistance protein RPM1 | (RefSeq) disease resistance protein RPM1 (A)
GLYMA_06G259800	4733	21.51	52.2833	1869.33	3816	1.17301	up	4.16905e-10	1.18908e-08	At5g17680	K13457 disease resistance protein RPM1 | (RefSeq) disease resistance protein RPM1 (A)
GLYMA_06G260100	4519	17.3133	42.0533	1343.67	2761	1.1733	up	4.15683e-11	1.33158e-09	At5g17680	K13457 disease resistance protein RPM1 | (RefSeq) LOW QUALITY PROTEIN: disease resistance protein RPM1 (A)
GLYMA_06G261100	3899	2.17	6.60333	124	306.667	1.47974	up	1.36181e-05	0.000178559	At4g27290	K13430 serine/threonine-protein kinase PBS1 [EC:2.7.11.1] | (RefSeq) probable serine/threonine-protein kinase PBL7 (A)
GLYMA_06G262300	6735	0.756667	2.30667	38	99.6667	1.52168	up	3.38074e-05	0.000407625	At1g65790	K13416 brassinosteroid insensitive 1-associated receptor kinase 1 [EC:2.7.10.1 2.7.11.1] | (RefSeq) BRASSINOSTEROID INSENSITIVE 1-associated receptor kinase 1 (A)
GLYMA_06G263500	7504	1.23667	2.74	164.667	323.333	1.0609	up	0.00183149	0.0130565	At5g17680	K13457 disease resistance protein RPM1 | (RefSeq) disease resistance protein RPM1 (A)
GLYMA_06G264100	2248	0.906667	4.08333	35	133.667	2.07483	up	8.88669e-06	0.000121678	At1g27170	--
GLYMA_06G265500	3571	16.4267	7.69333	1146.33	468	-1.18883	down	0.000190991	0.00187819	At5g48150	K14494 DELLA protein | (RefSeq) DELLA protein DWARF8 (A)
GLYMA_06G265600	5747	7.19667	3.37	436	172	-1.20515	down	7.052e-10	1.95769e-08	At5g54590	K13430 serine/threonine-protein kinase PBS1 [EC:2.7.11.1] | (RefSeq) serine/threonine-protein kinase (A)
GLYMA_06G266700	1853	7.44	19.05	126	264.667	1.22902	up	0.000213148	0.00206766	At1g11530	K03671 thioredoxin 1 | (RefSeq) uncharacterized protein LOC100306379 (A)
GLYMA_06G271600	5891	0.59	1.62667	24.6667	59.3333	1.38057	up	0.000965586	0.0076047	At4g10310	K24976 Trk/Ktr/HKT type cation transporter | (RefSeq) sodium transporter HKT1 (A)
GLYMA_06G271700	1429	3.84333	0.313333	59.3333	4	-3.74147	down	5.9089e-11	1.87188e-09	--	--
GLYMA_06G275500	1325	2.41	0.646667	64.3333	14.3333	-2.01418	down	5.72659e-06	8.20405e-05	At2g42760	--
GLYMA_06G276900	10148	32.8233	13.71	2742.67	962	-1.37172	down	3.03585e-17	1.85171e-15	At3g58640	K04424 sterile alpha motif and leucine zipper containing kinase AZK [EC:2.7.11.25] | (RefSeq) probable serine/threonine-protein kinase SIS8 isoform X1 (A)
GLYMA_06G277700	1040	28.8633	2.99667	609.667	53	-3.38526	down	7.53969e-41	2.51372e-38	At1g06340	--
GLYMA_06G287000	1036	11.8967	41.9733	249.333	735	1.70014	up	1.15942e-16	6.69148e-15	At1g28480	K03676 glutaredoxin 3 | (RefSeq) glutaredoxin-C9 (A)
GLYMA_06G287200	3394	0.43	1.35333	15.6667	46.6667	1.61934	up	0.00841433	0.0441952	At1g03840	--
GLYMA_06G289300	5425	0.283333	1.22667	11.3333	45	2.07992	up	4.05498e-05	0.000480021	At5g44190	K14491 two-component response regulator ARR-B family | (RefSeq) two-component response regulator ARR12 (A)
GLYMA_06G290200	2815	395.483	76.13	7247.33	1138.67	-2.50068	down	9.79709e-26	1.14823e-23	At2g20630	K17506 protein phosphatase 1L [EC:3.1.3.16] | (RefSeq) probable protein phosphatase 2C 58 (A)
GLYMA_06G293400	2741	6.01	0.723333	331.667	34	-3.16153	down	2.95554e-24	3.19161e-22	At4g03510	K10666 E3 ubiquitin-protein ligase RNF5 [EC:2.3.2.27] | (RefSeq) uncharacterized protein LOC100786373 (A)
GLYMA_06G294400	4288	22.5933	3.07667	1086.33	123	-2.99523	down	1.34204e-29	2.10436e-27	At4g14400	K15503 serine/threonine-protein phosphatase 6 regulatory ankyrin repeat subunit B | (RefSeq) protein ACCELERATED CELL DEATH 6 (A)
GLYMA_06G294500	3941	0.973333	3.99	26.3333	95	1.95864	up	1.29843e-06	2.13954e-05	At2g20750	K20628 expansin | (RefSeq) EXPB4; expansin-B3-like precursor (A)
GLYMA_06G295500	306	42.2767	15.31	249.667	79.3333	-1.55349	down	1.88029e-05	0.000239589	--	--
GLYMA_06G295700	7904	9.82667	4.76667	763	323.667	-1.13487	down	0.000142424	0.00144699	At5g54160	K22588 acetylserotonin O-methyltransferase, plant [EC:2.1.1.4] | (RefSeq) 3'-hydroxy-N-methyl-(S)-coclaurine 4'-O-methyltransferase-like (A)
GLYMA_06G295800	523	3.08667	0.443333	31.3333	4	-2.88433	down	7.05638e-05	0.000783434	--	--
GLYMA_06G297600	738	34.1333	9.54667	515.667	119.333	-1.96581	down	7.63247e-12	2.64747e-10	At4g10270	--
GLYMA_06G297800	863	32.3833	8.08	573.667	119	-2.12783	down	1.24652e-12	4.80419e-11	At4g10270	--
GLYMA_06G298400	841	4.51333	0.443333	79	6.33333	-3.47545	down	3.32796e-11	1.08222e-09	--	--
GLYMA_06G298600	745	143.723	75.68	2198.67	957.333	-1.04735	down	2.916e-06	4.49239e-05	At4g10270	--
GLYMA_06G298700	747	108.373	39.0967	1680	493.667	-1.5999	down	5.20584e-09	1.28334e-07	At4g10270	--
GLYMA_06G298800	261	11.8333	1.43	63	6.33333	-3.17833	down	5.71148e-08	1.21219e-06	At4g10270	--
GLYMA_06G298900	261	122.927	59.95	667.667	264.667	-1.16632	down	6.94193e-05	0.000773729	At4g10270	--
GLYMA_06G299000	545	63.2367	10.53	623	87	-2.70887	down	1.05282e-20	8.64925e-19	At4g10270	--
GLYMA_06G300100	1556	24.1167	56.94	655	1255.67	1.10865	up	0.00090153	0.00715805	At2g31180	K09422 transcription factor MYB, plant | (RefSeq) transcription factor MYB30 (A)
GLYMA_06G300200	1491	12.9867	296.077	333.667	6304	4.39245	up	8.87902e-62	8.02383e-59	At2g31180	K09422 transcription factor MYB, plant | (RefSeq) transcription factor MYB14 (A)
GLYMA_06G300600	3158	1.61667	4.35333	107	233.667	1.29948	up	0.000419463	0.00371821	At2g19130	K13416 brassinosteroid insensitive 1-associated receptor kinase 1 [EC:2.7.10.1 2.7.11.1] | (RefSeq) somatic embryogenesis receptor-like kinase-like protein precursor (A)
GLYMA_06G301100	705	8.98667	3.73667	104.667	35	-1.40084	down	0.000320136	0.00294415	At2g16030	--
GLYMA_06G302100	3930	0.65	1.77667	33	76.6667	1.34153	up	4.82472e-05	0.000561471	At3g22104	--
GLYMA_06G302200	5161	2.71667	1.25667	119.667	47.6667	-1.21691	down	0.000204613	0.00199671	At3g25830	K12742 isoprene synthase [EC:4.2.3.27] | (RefSeq) TPS3; tricyclene synthase EBOS, chloroplastic isoform X1 (A)
GLYMA_06G302500	4316	7.90333	4.22667	291.333	131.333	-1.01742	down	2.04926e-06	3.25493e-05	At2g32340_2	--
GLYMA_06G304900	13140	0.203333	0.67	14	38.6667	1.60456	up	0.00112331	0.00865283	At3g21700	K07976 Rab family, other | (RefSeq) septum-promoting GTP-binding protein 1 (A)
GLYMA_06G306000	5343	14.6133	5.63	618	202	-1.48706	down	1.06142e-14	5.15547e-13	At1g05170	K20855 beta-1,3-galactosyltransferase 1/2/3/4/5/7/8 [EC:2.4.1.-] | (RefSeq) probable beta-1,3-galactosyltransferase 2 (A)
GLYMA_06G307100	4996	11.3567	5.4	546	230.667	-1.16278	down	8.38294e-05	0.000907536	At1g76160	K19791 iron transport multicopper oxidase | (RefSeq) L-ascorbate oxidase homolog (A)
GLYMA_06G307600	1200	4.58667	0.77	110	15.3333	-2.70029	down	7.8008e-08	1.62155e-06	At1g05100	K20716 mitogen-activated protein kinase kinase kinase 17/18 | (RefSeq) mitogen-activated protein kinase kinase kinase 18 (A)
GLYMA_06G310000	6573	14.7133	2.13	1418.33	176.333	-2.88644	down	4.5232e-35	1.02865e-32	At5g36930	K13457 disease resistance protein RPM1 | (RefSeq) disease resistance protein RPM1 (A)
GLYMA_06G310700	3728	2.46	5.75333	81.6667	161.667	1.1157	up	0.00251544	0.0169572	At5g07050	--
GLYMA_06G315100	6209	1.08	6.68333	91.6667	480.333	2.52276	up	1.34055e-22	1.27167e-20	Hs14424433	K14802 phospholipid-transporting ATPase [EC:7.6.2.1] | (RefSeq) phospholipid-transporting ATPase 1 isoform X1 (A)
GLYMA_06G317200	2907	0.67	3.20667	27.6667	114.333	2.16981	up	4.53933e-10	1.29147e-08	At5g61520	K24193 MFS transporter, SP family, sugar:H+ symporter | (RefSeq) hexose carrier protein HEX6 (A)
GLYMA_06G318100	3241	5.02333	2.48333	211	88	-1.1269	down	4.21759e-06	6.24815e-05	At5g51380	K10268 F-box and leucine-rich repeat protein 2/20 | (RefSeq) F-box protein At5g07670 (A)
GLYMA_06G319300	1223	181.317	34.2633	4513.67	711.667	-2.52391	down	1.49564e-29	2.31352e-27	At5g62350	K01051 pectinesterase [EC:3.1.1.11] | (RefSeq) pectinesterase (A)
GLYMA_06G319600	1174	2.11333	0.74	51	14.6667	-1.64805	down	0.000295465	0.00274669	At1g33590	--
GLYMA_06G320600	3636	0.54	1.77	38	109	1.63219	up	9.84229e-07	1.65597e-05	At3g13380	K13415 protein brassinosteroid insensitive 1 [EC:2.7.10.1 2.7.11.1] | (RefSeq) BRI1B; brassinosteroid receptor precursor (A)
GLYMA_06G322700	2497	21.97	7.74333	1107.67	327.333	-1.61783	down	1.4166e-19	1.08828e-17	At4g10170	K08511 vesicle-associated membrane protein 72 | (RefSeq) vesicle-associated membrane protein 727 isoform X2 (A)
GLYMA_06G323100	3329	1.11	3.44	37.6667	100.333	1.53601	up	1.772e-06	2.85243e-05	At1g71380	K01179 endoglucanase [EC:3.2.1.4] | (RefSeq) endoglucanase 9 (A)
GLYMA_07G004300	18907	15.2767	5.22667	2327.33	697	-1.64253	down	3.1871e-11	1.04134e-09	At3g21180	K01537 P-type Ca2+ transporter type 2C [EC:7.2.2.10] | (RefSeq) LOW QUALITY PROTEIN: calcium-transporting ATPase 9, plasma membrane-type (A)
GLYMA_07G009100	3437	0.65	2.67667	36	127.667	1.94736	up	1.04964e-09	2.84939e-08	At1g55110	--
GLYMA_07G011800	2710	13.2867	3.57667	403	92.6667	-2.00144	down	4.07763e-19	2.96038e-17	At1g17710	K13248 pyridoxal phosphate phosphatase PHOSPHO2 [EC:3.1.3.74] | (RefSeq) inorganic pyrophosphatase 2 (A)
GLYMA_07G011900	2132	53.02	15.5267	1156	280.333	-1.89224	down	8.93271e-14	3.92765e-12	At1g17710	K13248 pyridoxal phosphate phosphatase PHOSPHO2 [EC:3.1.3.74] | (RefSeq) inorganic pyrophosphatase 2-like (A)
GLYMA_07G013700	5225	0.08	0.53	5	28.3333	2.60902	up	9.29944e-05	0.000993909	At1g51800	K13430 serine/threonine-protein kinase PBS1 [EC:2.7.11.1] | (RefSeq) probable serine/threonine-protein kinase PBL7 isoform X1 (A)
GLYMA_07G016300	898	3.42	8.44333	60.6667	129	1.19721	up	0.00033266	0.00304141	At3g16330	--
GLYMA_07G016800	1635	2.86333	6.44333	84.6667	164.667	1.07428	up	2.5132e-05	0.000312128	At4g32890	--
GLYMA_07G018300	723	10.3067	3.66	152.667	45	-1.61524	down	2.38761e-07	4.5399e-06	At3g27750	--
GLYMA_07G019500	5757	1.55667	0.53	83.3333	24.6667	-1.65306	down	1.17171e-05	0.000156806	At1g79840	K09338 homeobox-leucine zipper protein | (RefSeq) homeobox-leucine zipper protein GLABRA 2 (A)
GLYMA_07G021300	3308	52.5633	13.8333	2546	564.333	-2.03816	down	4.25062e-27	5.30787e-25	At2g24100	--
GLYMA_07G021800	1548	31.3367	11.2033	758	223.333	-1.60727	down	2.91959e-10	8.45353e-09	At1g80920	K03686 molecular chaperone DnaJ | (RefSeq) chaperone protein dnaJ A6, chloroplastic (A)
GLYMA_07G022300	4864	29.63	8.68667	1369.33	344	-1.87264	down	5.07859e-24	5.3333e-22	At2g03220	K13681 xyloglucan fucosyltransferase [EC:2.4.1.-] | (RefSeq) probable fucosyltransferase 7 isoform X1 (A)
GLYMA_07G024000	2377	9.29667	4.21	448.667	169.333	-1.26358	down	1.45828e-07	2.88963e-06	At1g80780	K12581 CCR4-NOT transcription complex subunit 7/8 | (RefSeq) probable CCR4-associated factor 1 homolog 7 (A)
GLYMA_07G028700	1227	4.26333	11.26	103.667	233	1.29337	up	2.89616e-06	4.46584e-05	At1g80450	--
GLYMA_07G034400	2019	17.09	5.39333	697	184.333	-1.77519	down	1.82777e-15	9.48121e-14	At1g80440	--
GLYMA_07G034500	4243	4.10333	2.17667	221.333	99.3333	-1.02493	down	0.000159583	0.00160397	At1g52420	--
GLYMA_07G035100	5462	1.23333	3.10667	38	80.6667	1.22356	up	0.000226834	0.00218394	At4g33090	K08776 puromycin-sensitive aminopeptidase [EC:3.4.11.14] | (RefSeq) aminopeptidase M1 isoform X2 (A)
GLYMA_07G037000	5707	3.88333	10.2733	378	857	1.30235	up	0.000111665	0.00116482	At5g17680	K13457 disease resistance protein RPM1 | (RefSeq) disease resistance protein RPM1 (A)
GLYMA_07G039400	2451	4.45667	10.2533	219.333	427.667	1.09197	up	1.04613e-05	0.000141378	At3g13840	K14494 DELLA protein | (RefSeq) GAI2; DELLA protein 1 (A)
GLYMA_07G039700	2408	95.7767	25.7367	3687	820.667	-2.01391	down	6.85606e-11	2.15997e-09	At2g05940	K13430 serine/threonine-protein kinase PBS1 [EC:2.7.11.1] | (RefSeq) serine/threonine protein kinase (A)
GLYMA_07G040400	1740	96.9933	33.2433	3477.33	977.667	-1.66765	down	6.93003e-14	3.08261e-12	At1g72510	--
GLYMA_07G043100	4897	98.9667	17.7033	5795	861.667	-2.60191	down	1.46142e-32	2.81938e-30	At3g14200	K09523 DnaJ homolog subfamily C member 3 | (RefSeq) dnaJ protein P58IPK homolog (A)
GLYMA_07G043500	1060	5.22667	2.23667	112.333	40	-1.34972	down	0.000443605	0.0039	At1g72430	--
GLYMA_07G043900	10916	39.7933	16.45	2849	1001	-1.38139	down	2.40233e-14	1.12239e-12	At3g43220	K22913 phosphatidylinositol 3,5-bisphosphate 5-phosphatase [EC:3.1.3.-] | (RefSeq) phosphoinositide phosphatase SAC2 isoform X2 (A)
GLYMA_07G044900	1074	4.37333	16.3533	74	222.667	1.76015	up	7.25343e-06	0.000101584	At5g49120	--
GLYMA_07G045500	1451	44.6333	11.3567	988	204.667	-2.10203	down	9.20909e-11	2.85932e-09	At3g14260	--
GLYMA_07G046800	7857	43.77	21.1867	2387.33	974.333	-1.15786	down	9.56579e-14	4.18458e-12	At1g53730	K13430 serine/threonine-protein kinase PBS1 [EC:2.7.11.1] | (RefSeq) serine/threonine-protein kinase PBS1 isoform X2 (A)
GLYMA_07G047000	825	1.68	0.516667	28.3333	7.33333	-1.81554	down	0.00470481	0.0279376	--	--
GLYMA_07G048600	15786	0.726667	2.4	31	91.6667	1.65405	up	2.18978e-05	0.000275548	At4g10490	K24028 salicylic acid 3-hydroxylase [EC:1.14.11.-] | (RefSeq) protein DMR6-LIKE OXYGENASE 2 isoform X1 (A)
GLYMA_07G050300	4453	57.0433	25.9067	1618	596.333	-1.264	down	4.69676e-06	6.91327e-05	At1g68290	--
GLYMA_07G052100	1478	1.27	3.13333	30.6667	63	1.17382	up	0.00905688	0.0468605	At3g61890	K09338 homeobox-leucine zipper protein | (RefSeq) homeodomain/HOMEOBOX transcription factor (A)
GLYMA_07G052700	2270	7.54	3.91667	347	150	-1.06172	down	3.86104e-06	5.77727e-05	At2g46620	K08900 mitochondrial chaperone BCS1 | (RefSeq) AAA-ATPase At2g46620 (A)
GLYMA_07G055300	1835	15.5167	44.2333	555	1372	1.41418	up	1.10851e-11	3.81425e-10	At1g01300	K22683 aspartyl protease family protein [EC:3.4.23.-] | (RefSeq) aspartyl protease family protein 2 (A)
GLYMA_07G055900	16382	7.54667	3.96	1011.33	461.667	-1.02304	down	0.000341224	0.00310565	At4g28080	K03255 protein TIF31 | (RefSeq) protein TSS isoform X2 (A)
GLYMA_07G056900	3875	98.6767	19.6433	2966.33	489	-2.45075	down	3.93588e-27	4.93278e-25	At1g01360	K14496 abscisic acid receptor PYR/PYL family | (RefSeq) uncharacterized protein LOC100810273 (A)
GLYMA_07G058400	4221	28.8	12.95	1551.33	614.333	-1.24628	down	1.03802e-05	0.000140337	At3g25500	--
GLYMA_07G058800	1620	9.69667	0.446667	224	8.66667	-4.54428	down	1.6428e-27	2.09716e-25	At5g56760	K00640 serine O-acetyltransferase [EC:2.3.1.30] | (RefSeq) serine acetyltransferase 5 (A)
GLYMA_07G060600	1667	1.67333	0.633333	55.6667	18	-1.51338	down	0.00117619	0.00898765	At4g01140	--
GLYMA_07G063000	2933	0.683333	0.15	39.3333	7	-2.32854	down	5.09204e-05	0.000587767	At3g09140	K17427 large subunit ribosomal protein L46 | (RefSeq) 39S ribosomal protein L46, mitochondrial-like (A)
GLYMA_07G066000	3392	5.38667	12.39	208.333	403.333	1.09613	up	9.78043e-06	0.000132751	At1g01500	--
GLYMA_07G067700	4434	0.0766667	3.49	3.66667	148	5.43379	up	7.85631e-07	1.34355e-05	At1g01580	K00521 ferric-chelate reductase [EC:1.16.1.7] | (RefSeq) ferric reduction oxidase 2 (A)
GLYMA_07G069000	3029	1.40333	3.42333	83	175.667	1.18979	up	6.23607e-06	8.86002e-05	At4g00340	K13416 brassinosteroid insensitive 1-associated receptor kinase 1 [EC:2.7.10.1 2.7.11.1] | (RefSeq) somatic embryogenesis receptor-like kinase-like protein precursor (A)
GLYMA_07G069700	4607	12.8733	6.11	460.667	185.667	-1.17167	down	0.000365437	0.00329731	At1g01610	K13508 glycerol-3-phosphate acyltransferase [EC:2.3.1.15 2.3.1.198] | (RefSeq) probable glycerol-3-phosphate acyltransferase 8 (A)
GLYMA_07G071300	7501	31.4033	5.89	1036.33	164.667	-2.52261	down	1.78266e-35	4.10849e-33	At4g00520	K01068 acyl-coenzyme A thioesterase 1/2/4 [EC:3.1.2.2] | (RefSeq) acyl-CoA thioesterase 2 isoform X2 (A)
GLYMA_07G071400	3544	2.93333	1.2	155.667	53	-1.41312	down	3.54051e-06	5.33953e-05	At3g61350	--
GLYMA_07G073100	4412	916.887	253.117	20476.7	4578.67	-1.98419	down	5.837e-14	2.61333e-12	At2g45820	--
GLYMA_07G074100	2822	5.51333	1.91	208.667	60.3333	-1.64685	down	1.30519e-06	2.14862e-05	At3g61220	K15095 (+)-neomenthol dehydrogenase [EC:1.1.1.208] | (RefSeq) short-chain dehydrogenase/reductase domain-containing protein (A)
GLYMA_07G076200	784	4.06333	0.72	65.3333	9.66667	-2.61279	down	1.14665e-07	2.31486e-06	At3g61190	--
GLYMA_07G078400	728	8.01	4.17	113.667	51.3333	-1.04044	down	0.00263788	0.0176098	--	--
GLYMA_07G080700	4238	60.16	17.8033	3382.67	854.667	-1.85992	down	6.03139e-20	4.69655e-18	At2g19130	K13436 pto-interacting protein 1 [EC:2.7.11.1] | (RefSeq) pto-interacting protein 1 (A)
GLYMA_07G086000	2464	10.5533	5.34667	435.667	184	-1.10058	down	0.000102546	0.00108163	At3g18830	K08150 MFS transporter, SP family, solute carrier family 2 (myo-inositol transporter), member 13 | (RefSeq) inositol transporter 1 isoform X1 (A)
GLYMA_07G086300	1183	6.17333	0.583333	32	2.66667	-3.49275	down	5.11565e-06	7.45001e-05	At3g24520	K09419 heat shock transcription factor, other eukaryote | (RefSeq) HSF-16; heat stress transcription factor 16 (A)
GLYMA_07G086400	1931	6.34333	1.15667	117.333	18	-2.57196	down	1.88533e-11	6.31631e-10	At3g24520	K09419 heat shock transcription factor, other eukaryote | (RefSeq) heat stress transcription factor C-1 (A)
GLYMA_07G087200	821	24.03	129.69	347.333	1552.33	2.31462	up	4.92746e-29	7.05038e-27	At3g61640	--
GLYMA_07G088600	1650	0.47	2.16667	10	41.6667	2.14442	up	7.25523e-05	0.000802657	At3g24450	K07213 copper chaperone | (RefSeq) copper transport protein ATX1 (A)
GLYMA_07G089400	6188	12.9567	6.06333	692.667	272.333	-1.20944	down	2.10639e-10	6.19823e-09	At1g18460	K01052 lysosomal acid lipase/cholesteryl ester hydrolase [EC:3.1.1.13] | (RefSeq) triacylglycerol lipase 2 isoform X1 (A)
GLYMA_07G089900	2791	0.376667	1.65333	14.3333	53.6667	2.03013	up	1.41602e-06	2.31553e-05	At3g26310	K20562 biphenyl-4-hydroxylase | (RefSeq) cytochrome P450 71AU50 (A)
GLYMA_07G090000	4480	5.89667	14.22	257	513.667	1.15321	up	3.20047e-06	4.88246e-05	At1g49050	K22683 aspartyl protease family protein [EC:3.4.23.-] | (RefSeq) aspartyl protease family protein 2 (A)
GLYMA_07G090800	1275	107.61	21.59	2845.67	463.333	-2.44367	down	2.11239e-17	1.30938e-15	At1g13350	--
GLYMA_07G091600	1679	639.153	249.807	13252	4315	-1.4707	down	1.18517e-16	6.82862e-15	At3g02550	--
GLYMA_07G092000	3113	6.57667	1.78333	246.333	55.3333	-1.99786	down	1.04468e-09	2.83815e-08	At3g18400	--
GLYMA_07G092700	1871	3.87667	0.643333	85.3333	12	-2.7143	down	2.02811e-07	3.91266e-06	At1g73830	K12126 phytochrome-interacting factor 3 | (RefSeq) transcription factor PIF3 (A)
GLYMA_07G095900	11554	47.0767	22	2585.33	1015	-1.21061	down	7.13231e-12	2.48401e-10	At1g18390	K13430 serine/threonine-protein kinase PBS1 [EC:2.7.11.1] | (RefSeq) serine/threonine-protein kinase (A)
GLYMA_07G096000	1098	20.1867	1.37333	427.333	25.3333	-3.96962	down	4.59974e-30	7.48602e-28	At1g18390	--
GLYMA_07G097900	2541	3.74333	9.71	169.333	384.667	1.28719	up	1.1521e-05	0.000154302	At3g18230	--
GLYMA_07G098500	971	1.13667	4.39667	18	55	1.79566	up	0.00295718	0.0192753	At4g05030	--
GLYMA_07G102500	4113	5.7	14.1667	285.333	630	1.22358	up	0.000206974	0.00201688	At1g73590	K13947 auxin efflux carrier family protein | (RefSeq) PIN1B; auxin efflux carrier component 1b (A)
GLYMA_07G103100	1319	0.61	1.62667	14	31.6667	1.31441	up	0.00840411	0.044155	At3g17950	--
GLYMA_07G103500	3216	0.74	2.17333	40	101.667	1.46187	up	3.83675e-06	5.74342e-05	At1g48480	K13415 protein brassinosteroid insensitive 1 [EC:2.7.10.1 2.7.11.1] | (RefSeq) BRI1B; brassinosteroid receptor precursor (A)
GLYMA_07G104300	564	24.0167	5.22333	157.333	28	-2.32374	down	3.49691e-11	1.12755e-09	At1g67920	--
GLYMA_07G106000	1314	16.2833	49.7067	444.667	1097.33	1.48562	up	1.57044e-06	2.55104e-05	At5g37490	--
GLYMA_07G106800	10115	0.346667	0.963333	19	45.3333	1.37667	up	0.000691803	0.00567523	At1g32240	K14491 two-component response regulator ARR-B family | (RefSeq) two-component response regulator ARR12 isoform X1 (A)
GLYMA_07G108400	3216	0.5	1.39667	28	64.6667	1.35515	up	0.00029013	0.00270075	At2g19130	K13415 protein brassinosteroid insensitive 1 [EC:2.7.10.1 2.7.11.1] | (RefSeq) BRI1B; brassinosteroid receptor precursor (A)
GLYMA_07G110000	1353	0.32	1.48333	8	34	2.16288	up	0.000519337	0.00445851	At2g44940	K09286 EREBP-like factor | (RefSeq) AP2 domain transcription factor TINY (A)
GLYMA_07G111300	4437	2.86667	6.85333	210.333	420	1.14387	up	1.47237e-07	2.91418e-06	At2g44930	--
GLYMA_07G113800	498	1.9	11.3233	19	95.6667	2.45713	up	3.27007e-11	1.0644e-09	At2g44840	K09286 EREBP-like factor | (RefSeq) ethylene-responsive transcription factor 13 (A)
GLYMA_07G120800	831	5.69	1.73667	96.3333	24.3333	-1.84052	down	5.56056e-06	7.99622e-05	At2g44600	--
GLYMA_07G120900	7508	9.75	5.05	445	194.333	-1.05621	down	0.000102557	0.00108163	At3g60190	K17065 dynamin 1-like protein [EC:3.6.5.5] | (RefSeq) dynamin-related protein 3A (A)
GLYMA_07G121200	2039	0.303333	0.956667	11.6667	33	1.59003	up	0.00286966	0.0188078	--	--
GLYMA_07G122800	4712	12.8633	6.93333	1040.33	474.333	-1.0024	down	5.99098e-08	1.26916e-06	At5g17640	--
GLYMA_07G124400	2720	0.203333	3.73	6.66667	97.3333	4.0373	up	0.00242841	0.0165034	At1g55290	K06892 feruloyl-CoA 6-hydroxylase [EC:1.14.11.61] | (RefSeq) feruloyl CoA ortho-hydroxylase F6H1-3 (A)
GLYMA_07G125600	1377	111.797	23.27	2405	415.333	-2.38501	down	5.38473e-15	2.69944e-13	At5g56550	--
GLYMA_07G125800	4842	13.7733	2.92333	509.667	91.6667	-2.35023	down	6.26861e-19	4.45681e-17	At4g29310	--
GLYMA_07G126800	1776	7.33	3.71333	268.333	112	-1.10483	down	0.000104672	0.00110191	At2g19810	K23048 RING finger protein unkempt | (RefSeq) zinc finger CCCH domain-containing protein (A)
GLYMA_07G127800	5083	10.7967	23.5933	801	1502.67	1.02893	up	1.13923e-05	0.000152757	At2g19710	--
GLYMA_07G128000	2244	1.29	4.46	46	135	1.68312	up	1.85655e-05	0.000237091	At4g26200	K01762 1-aminocyclopropane-1-carboxylate synthase [EC:4.4.1.14] | (RefSeq) 1-aminocyclopropane-1-carboxylate synthase 7 (A)
GLYMA_07G129000	2423	8.14667	1.20333	294	37	-2.86927	down	2.66743e-21	2.2757e-19	At2g19590	K05933 aminocyclopropanecarboxylate oxidase [EC:1.14.17.4] | (RefSeq) 1-aminocyclopropane-1-carboxylate oxidase 1 (A)
GLYMA_07G129300	1411	55.4467	24.2267	1565	579.667	-1.30789	down	1.72145e-12	6.49612e-11	At2g19570	K01489 cytidine deaminase [EC:3.5.4.5] | (RefSeq) cytidine deaminase 1 (A)
GLYMA_07G130800	4839	13.26	6.27333	814.667	327.333	-1.18427	down	0.000528296	0.00451878	At5g60010	K13447 respiratory burst oxidase [EC:1.6.3.- 1.11.1.-] | (RefSeq) respiratory burst oxidase homolog protein B (A)
GLYMA_07G132600	4189	5.22333	1.71333	139	39.3333	-1.70868	down	2.38598e-07	4.53931e-06	At2g37640	K20628 expansin | (RefSeq) expansin-A8 (A)
GLYMA_07G133000	5414	0.976667	0.283333	74.3333	18.3333	-1.90166	down	3.39385e-05	0.000408785	At1g07540	--
GLYMA_07G133800	869	15.6967	7.72	283	113.333	-1.15459	down	7.19385e-05	0.000796893	--	--
GLYMA_07G135400	2437	1.36	3.78	65.3333	156	1.37549	up	6.91814e-08	1.44947e-06	At2g37710	K13418 somatic embryogenesis receptor kinase 1 [EC:2.7.10.1 2.7.11.1] | (RefSeq) somatic embryogenesis receptor kinase 2 (A)
GLYMA_07G136800	752	464.183	127.253	7218	1628.33	-1.99168	down	1.62858e-14	7.73518e-13	--	--
GLYMA_07G137500	4467	1.72	3.76333	145.333	270.333	1.01819	up	3.41835e-06	5.17804e-05	At5g01150	K22390 acid phosphatase type 7 | (RefSeq) purple acid phosphatase 23 isoform X2 (A)
GLYMA_07G139100	7107	2.35	6.34667	107.333	238.333	1.30801	up	1.51722e-06	2.47043e-05	At2g37900	K14638 solute carrier family 15 (peptide/histidine transporter), member 3/4 | (RefSeq) protein NRT1/ PTR FAMILY 5.2 (A)
GLYMA_07G141000	2711	18.0367	45.0667	712.667	1571.67	1.235	up	0.00012236	0.00126524	At3g54000	--
GLYMA_07G144400	792	0.486667	1.88667	7.33333	25.3333	1.88584	up	0.00167037	0.0120784	At2g38050	K09591 steroid 5-alpha-reductase [EC:1.3.1.22] | (RefSeq) steroid 5-alpha-reductase DET2 (A)
GLYMA_07G150900	4071	59.2167	13.18	1649.67	305	-2.28997	down	6.28319e-17	3.72008e-15	At5g05600	K24028 salicylic acid 3-hydroxylase [EC:1.14.11.-] | (RefSeq) protein DOWNY MILDEW RESISTANCE 6 (A)
GLYMA_07G151100	1682	25.71	9.01667	659.667	193.667	-1.62556	down	4.08551e-14	1.85823e-12	At5g01380	--
GLYMA_07G153100	3257	244.593	13.7433	11280	541.667	-4.26412	down	8.09952e-110	4.63563e-106	At5g54960	K01568 pyruvate decarboxylase [EC:4.1.1.1] | (RefSeq) pyruvate decarboxylase 2 (A)
GLYMA_07G153800	4778	28.43	115.077	1343	4500	1.90172	up	4.83999e-17	2.89053e-15	At2g38290	K03320 ammonium transporter, Amt family | (RefSeq) AMT2.1; ammonium transporter AMT2.1 (A)
GLYMA_07G154700	1165	2.47	0.816667	34.3333	9.33333	-1.73517	down	0.00493175	0.0290093	--	--
GLYMA_07G155400	3748	57.62	26.0867	1245	459.333	-1.26991	down	9.24922e-07	1.56078e-05	At5g37070	--
GLYMA_07G155500	1027	261.717	56.22	5447.67	979	-2.33575	down	3.14174e-41	1.08977e-38	At2g38310	K14496 abscisic acid receptor PYR/PYL family | (RefSeq) abscisic acid receptor PYL4 (A)
GLYMA_07G163200	7019	23.32	124.59	1854	8318.67	2.30724	up	6.81981e-23	6.57843e-21	At2g23460	K19729 guanine nucleotide-binding protein G(t) subunit alpha 3 | (RefSeq) guanine nucleotide-binding protein alpha-2 subunit isoform X2 (A)
GLYMA_07G164600	4422	0.533333	1.53	17	43.3333	1.45249	up	0.00127795	0.00964715	At2g01420	K13947 auxin efflux carrier family protein | (RefSeq) PIN3D; auxin efflux carrier component 3d (A)
GLYMA_07G165300	1054	78.7833	39.8367	1670.67	711.667	-1.09788	down	3.44258e-11	1.11527e-09	--	--
GLYMA_07G168900	6972	1.55667	4.11333	195.667	448	1.30682	up	8.98204e-09	2.14161e-07	At4g01870	--
GLYMA_07G174000	6442	0.836667	2.15667	95.3333	210.333	1.26115	up	6.03614e-07	1.05165e-05	At1g66140	--
GLYMA_07G174100	3721	6.84333	18.8533	399.333	928.667	1.35474	up	2.21902e-11	7.38383e-10	At1g14740	--
GLYMA_07G178300	1245	3.09667	1.39	57.6667	21.3333	-1.2872	down	0.00945055	0.0485535	At2g15780	--
GLYMA_07G180600	970	2.50333	7.63667	50.6667	125.333	1.4698	up	7.95758e-06	0.000110499	At3g03280	--
GLYMA_07G186600	3723	10.4933	3.52667	627.667	176.667	-1.67751	down	2.00686e-08	4.58519e-07	At1g61740	--
GLYMA_07G188000	1510	9.48667	2.26333	175.333	35	-2.18804	down	3.81792e-12	1.36998e-10	At5g54530	--
GLYMA_07G188900	3208	20.1867	5.36333	624	139.333	-2.02676	down	4.9893e-21	4.17884e-19	At1g11380	--
GLYMA_07G189000	3866	12.1433	2.67333	856.667	164.667	-2.28202	down	3.41054e-16	1.89205e-14	At4g05150	--
GLYMA_07G189300	1771	4.05	0.623333	116.667	14.6667	-2.82835	down	6.87944e-13	2.72795e-11	At4g21440	K09422 transcription factor MYB, plant | (RefSeq) transcription factor MYB102 (A)
GLYMA_07G189500	3804	326.767	78.1433	13192	2665	-2.17483	down	5.71564e-32	1.03849e-29	At1g11260	K24193 MFS transporter, SP family, sugar:H+ symporter | (RefSeq) STP1; monosaccharide transporter (A)
GLYMA_07G190700	5393	3.45667	9.49	185.667	437.333	1.35833	up	7.71711e-09	1.85838e-07	At5g57580	--
GLYMA_07G192400	4074	0.75	2.60333	14.3333	44	1.72195	up	0.000161478	0.00161902	At1g11120	--
GLYMA_07G194900	4278	0.39	0.963333	33.3333	69	1.19461	up	0.00129724	0.00977342	At5g14770	K18998 RNA polymerase II C-terminal domain phosphatase-like 1/2 [EC:3.1.3.16] | (RefSeq) RNA polymerase II C-terminal domain phosphatase-like 1 isoform X1 (A)
GLYMA_07G195300	2539	236.35	21.14	6396.67	474.667	-3.6037	down	1.51873e-63	1.53392e-60	At4g27450	--
GLYMA_07G198200	5605	0.586667	1.76333	56	146.667	1.50372	up	2.01412e-05	0.000255409	At1g28260	K14409 protein SMG7 | (RefSeq) protein SMG7 (A)
GLYMA_07G199800	6055	34.0933	176.967	1737.67	7394	2.25766	up	3.55756e-21	3.01646e-19	At1g28380	--
GLYMA_07G199900	2915	121.673	29.5567	7167.67	1458.33	-2.15346	down	9.83219e-33	1.92936e-30	CE01921	K08770 ubiquitin C | (RefSeq) polyubiquitin 3 (A)
GLYMA_07G200800	3496	70.57	13.4167	2268.67	355	-2.51859	down	1.561e-28	2.13565e-26	At5g26990	--
GLYMA_07G208700	2084	306.877	32.4667	7238.67	634.333	-3.35916	down	1.79293e-41	6.28256e-39	At2g15890	--
GLYMA_07G208900	1723	1.89333	4.59667	50	105	1.18313	up	7.06224e-05	0.000783831	At3g19000	K05278 flavonol synthase [EC:1.14.20.6] | (RefSeq) uncharacterized protein LOC100810937 (A)
GLYMA_07G209200	960	17.21	3.02	346.333	49.3333	-2.64497	down	4.11839e-14	1.87071e-12	--	--
GLYMA_07G209500	2922	14.1033	5.18	519	161	-1.55657	down	1.87058e-13	7.91079e-12	At1g49560	K14491 two-component response regulator ARR-B family | (RefSeq) two-component response regulator ARR12 (A)
GLYMA_07G209700	1067	1.74333	6.13667	16.6667	48.3333	1.66696	up	0.00289347	0.0189297	--	--
GLYMA_07G209900	2764	4.56	28.3767	147	750.667	2.50993	up	2.6049e-18	1.74649e-16	At1g49570	K00430 peroxidase [EC:1.11.1.7] | (RefSeq) peroxidase 10 (A)
GLYMA_07G210700	915	2.77	1.42	50.6667	22	-1.07004	down	0.00707551	0.0387085	At2g15760	--
GLYMA_07G212400	1031	136.093	444.433	2898	7741.67	1.58595	up	1.14604e-10	3.50446e-09	At4g34410	K09286 EREBP-like factor | (RefSeq) EBP; uncharacterized protein LOC100819416 (A)
GLYMA_07G213100	4002	1.9	5.72667	111	284.333	1.48299	up	3.56756e-11	1.14925e-09	At3g19290	K14432 ABA responsive element binding factor | (RefSeq) ABSCISIC ACID-INSENSITIVE 5-like protein 4 (A)
GLYMA_07G213900	6343	1.02333	2.62	50.3333	113.333	1.26462	up	0.000173948	0.00172791	At3g19300	K13430 serine/threonine-protein kinase PBS1 [EC:2.7.11.1] | (RefSeq) serine/threonine-protein kinase PBS1 isoform X2 (A)
GLYMA_07G215500	2396	2.47	9.16667	117.333	371	1.78928	up	9.53016e-18	6.06047e-16	At2g15480	K14595 abscisate beta-glucosyltransferase [EC:2.4.1.263] | (RefSeq) abscisate beta-glucosyltransferase (A)
GLYMA_07G217900	4797	0.78	1.80667	45	92	1.12406	up	0.00689906	0.0380576	At1g70940	K13947 auxin efflux carrier family protein | (RefSeq) PIN3B; auxin efflux carrier component 3b (A)
GLYMA_07G218000	6620	6.32333	2.69667	132.667	48.3333	-1.33846	down	5.05235e-06	7.37033e-05	At2g01430	K09338 homeobox-leucine zipper protein | (RefSeq) homeobox-leucine zipper protein HOX3 isoform X2 (A)
GLYMA_07G218100	8729	0.546667	1.26	93.3333	185.333	1.11227	up	0.00070936	0.00579297	--	K24193 MFS transporter, SP family, sugar:H+ symporter | (RefSeq) sugar transport protein 13 (A)
GLYMA_07G218400	1588	2.04	4.38333	63.6667	118	1.00792	up	0.000460935	0.00403274	At1g15000	K09645 vitellogenic carboxypeptidase-like protein [EC:3.4.16.-] | (RefSeq) serine carboxypeptidase-like 50 (A)
GLYMA_07G219800	4622	0.776667	1.91667	36.6667	74	1.17353	up	0.00186256	0.013228	At2g34930	--
GLYMA_07G220500	2011	4.08333	9.79667	168	334	1.14104	up	1.18031e-06	1.96067e-05	At1g64950	K24184 cytochrome P450 family 89 subfamily A [EC:1.14.-.-] | (RefSeq) cytochrome P450 89A2 (A)
GLYMA_07G222600	6055	0.0533333	0.373333	6	38.3333	2.784	up	8.66376e-05	0.000934695	At3g29775	K09458 3-oxoacyl-[acyl-carrier-protein] synthase II [EC:2.3.1.179] | (RefSeq) 3-oxoacyl-[acyl-carrier-protein] synthase II, chloroplastic-like (A)
GLYMA_07G222700	6037	1.42667	3.45667	58.6667	115	1.14706	up	0.00781501	0.0418213	At1g76430	K08176 MFS transporter, PHS family, inorganic phosphate transporter | (RefSeq) PHT1-9; inorganic phosphate transporter 1-9 (A)
GLYMA_07G223100	1575	4.89333	2.47667	133.333	58.3333	-1.08282	down	0.00251215	0.0169384	At5g45100	K19042 E3 ubiquitin-protein ligase BOI and related proteins [EC:2.3.2.27] | (RefSeq) BOI-related E3 ubiquitin-protein ligase 1 (A)
GLYMA_07G226600	1141	118.443	40.1433	2849.67	774	-1.69054	down	4.93143e-08	1.05577e-06	At2g03440	--
GLYMA_07G227200	5112	0.55	1.45	30	65.3333	1.27189	up	0.000997918	0.00781672	At2g03340	K13424 WRKY transcription factor 33 | (RefSeq) WRKY19; WRKY transcription factor 19 (A)
GLYMA_07G227700	6533	0.753333	2.07667	47.3333	114	1.37321	up	8.426e-06	0.000116251	At1g69420	K20027 palmitoyltransferase ZDHHC1/11 [EC:2.3.1.225] | (RefSeq) probable protein S-acyltransferase 22 (A)
GLYMA_07G230300	6687	0.106667	0.386667	10.6667	31	1.71629	up	0.0095109	0.0488052	At1g69610	--
GLYMA_07G230400	3424	0.91	2.48333	44.6667	106	1.35155	up	5.29726e-05	0.000609075	At4g36260	--
GLYMA_07G231500	13793	5.25333	11.5667	90.6667	174.667	1.0445	up	0.000575723	0.00486714	At5g13500	K20782 hydroxyproline O-arabinosyltransferase [EC:2.4.2.58] | (RefSeq) hydroxyproline O-arabinosyltransferase PLENTY isoform X1 (A)
GLYMA_07G232200	7481	0.776667	1.79333	85.6667	169.667	1.1029	up	8.33033e-05	0.000903021	At4g13970	--
GLYMA_07G232500	12264	11.0633	3.22333	405.667	102.667	-1.87926	down	5.80968e-12	2.04201e-10	At5g12170	--
GLYMA_07G234400	953	12.1	3.21333	239.667	51.3333	-2.04165	down	5.16196e-08	1.10375e-06	At4g24130	--
GLYMA_07G235900	2307	34.6733	85.76	1023.33	2078.33	1.18895	up	9.98979e-06	0.000135379	At3g06490	K09422 transcription factor MYB, plant | (RefSeq) uncharacterized protein LOC100791349 (A)
GLYMA_07G238000	3022	15.6133	2.12333	776.333	88.3333	-2.99171	down	6.8211e-42	2.56218e-39	At5g49520	K18835 WRKY transcription factor 2 | (RefSeq) WRKY59; probable WRKY transcription factor 2 (A)
GLYMA_07G244600	3333	32.3333	17.28	787.667	359.667	-1.00899	down	1.48542e-08	3.44425e-07	At4g16060	--
GLYMA_07G244800	1914	2.48	0.643333	96	20.6667	-2.06087	down	1.29026e-06	2.12709e-05	At3g06780	--
GLYMA_07G253500	1273	1.28333	5.19333	35.6667	112.667	1.86341	up	0.000649813	0.00538479	At3g21550	--
GLYMA_07G253600	1097	1.46667	5.62	34	104.667	1.80002	up	0.000286988	0.00267514	At3g21550	--
GLYMA_07G254700	1416	2.78	1.29	78.3333	31	-1.21052	down	0.00061179	0.00513037	At2g15480	K23260 scopoletin glucosyltransferase [EC:2.4.1.128] | (RefSeq) SG-1-LIKE; scopoletin glucosyltransferase (A)
GLYMA_07G256700	2031	0.356667	1.69	13.6667	58.3333	2.1843	up	5.71901e-06	8.19661e-05	At5g19040	K10760 adenylate dimethylallyltransferase (cytokinin synthase) [EC:2.5.1.27 2.5.1.112] | (RefSeq) adenylate isopentenyltransferase 5, chloroplastic (A)
GLYMA_07G258100	1064	33.44	4.04333	504	49.3333	-3.17539	down	2.62048e-21	2.24407e-19	At5g19190	--
GLYMA_07G260100	1420	8.02333	0.443333	234.667	10.6667	-4.2976	down	1.10941e-28	1.53618e-26	At1g11700	--
GLYMA_07G260700	2228	0.683333	2.25667	30.6667	85	1.60257	up	3.74506e-05	0.000447168	At4g04630	--
GLYMA_07G261500	2507	7.89333	3.08	339.667	109.333	-1.48588	down	2.69151e-07	5.07001e-06	At4g21990_1	K05907 adenylyl-sulfate reductase (glutathione) [EC:1.8.4.9] | (RefSeq) 5'-adenylylsulfate reductase 3, chloroplastic (A)
GLYMA_07G261800	4793	2.04	4.63667	85.3333	176.333	1.10874	up	0.00737094	0.0399366	At4g22010	K19791 iron transport multicopper oxidase | (RefSeq) L-ascorbate oxidase homolog (A)
GLYMA_07G262500	1783	45.0567	125.96	1269	2918	1.36379	up	1.65085e-06	2.67281e-05	At1g62280	--
GLYMA_07G262700	3307	20.6967	55.6933	948	2169.33	1.32567	up	3.2165e-08	7.13531e-07	At4g04450	K18834 WRKY transcription factor 1 | (RefSeq) WRKY transcription factor 1 (A)
GLYMA_07G263400	4464	14.9633	7.79667	665	293	-1.05077	down	1.37034e-09	3.64505e-08	At1g11990	K23280 rhamnogalacturonan I rhamnosyltransferase [EC:2.4.1.351] | (RefSeq) rhamnogalacturonan I rhamnosyltransferase 1 isoform X2 (A)
GLYMA_07G264800	1283	13.4433	3.46667	355	75.3333	-2.0801	down	5.52977e-14	2.48225e-12	At1g12020	--
GLYMA_07G266400	2944	27.1833	7.34	1214.33	272.333	-2.00802	down	1.54568e-24	1.71221e-22	At2g23140	K08332 vacuolar protein 8 | (RefSeq) U-box domain-containing protein 15-like (A)
GLYMA_07G266500	3801	10.56	53.7667	794.667	3442	2.2454	up	2.96963e-24	3.19677e-22	At5g48150	K14494 DELLA protein | (RefSeq) DELLA protein DWARF8 (A)
GLYMA_07G268400	1439	0.893333	6.42667	17.3333	100.333	2.70043	up	2.2919e-09	5.93542e-08	At5g47710	K12486 stromal membrane-associated protein | (RefSeq) ADP-ribosylation factor GTPase-activating protein AGD12 (A)
GLYMA_07G274000	2609	4.73667	0.96	245.333	42.6667	-2.40898	down	2.71062e-16	1.52345e-14	--	--
GLYMA_08G003200	5197	1.95667	6.50333	130.667	363.333	1.62043	up	2.9045e-12	1.06447e-10	At3g05270	--
GLYMA_08G004100	675	4.52	1.45333	64.6667	16.6667	-1.77813	down	0.00185542	0.0131942	At5g53590	K14488 SAUR family protein | (RefSeq) auxin-responsive protein SAUR32 (A)
GLYMA_08G009700	2211	0.723333	4.87667	17.3333	99	2.63687	up	5.49905e-11	1.74688e-09	At5g13180	--
GLYMA_08G010000	2517	2.02	4.43667	53.6667	101.333	1.02989	up	0.00356525	0.0224109	At5g50790	K15382 solute carrier family 50 (sugar transporter) | (RefSeq) SWEET21; sugar efflux transporter SWEET21 (A)
GLYMA_08G010400	772	22.1433	4.14667	346.333	54	-2.53474	down	5.91095e-24	6.11392e-22	At5g50760	K14488 SAUR family protein | (RefSeq) auxin-responsive protein SAUR71 (A)
GLYMA_08G012900	571	2.43667	0.17	27.6667	1.66667	-3.93756	down	6.36292e-06	9.0253e-05	--	--
GLYMA_08G013100	1078	8.47667	50.4167	168	820.667	2.44619	up	8.85403e-15	4.34353e-13	At3g14260	--
GLYMA_08G014100	11223	21.51	11.4733	1192.33	535	-1.01902	down	1.40842e-09	3.74055e-08	At5g41260	K14500 BR-signaling kinase [EC:2.7.11.1] | (RefSeq) serine/threonine-protein kinase BSK7 isoform X2 (A)
GLYMA_08G015700	2400	12.8933	60.4967	611	2452	2.12919	up	1.70957e-14	8.09846e-13	At5g41330	--
GLYMA_08G015800	2772	3.17	14.3567	116.667	442.333	2.06704	up	3.53867e-15	1.79494e-13	At5g52430	--
GLYMA_08G018000	2964	30.2733	67.1533	1367.67	2533.67	1.03454	up	1.49675e-07	2.95733e-06	At4g11280	K20772 1-aminocyclopropane-1-carboxylate synthase 1/2/6 [EC:4.4.1.14] | (RefSeq) ACS; 1-aminocyclopropane-1-carboxylate synthase (A)
GLYMA_08G018300	1818	24.3633	3.86	700	90	-2.78259	down	1.22427e-19	9.42631e-18	At4g23550	K13426 WRKY transcription factor 29 | (RefSeq) probable WRKY transcription factor 29 (A)
GLYMA_08G018600	420	6.29333	2.83	52	20	-1.25695	down	0.00456775	0.0272645	--	--
GLYMA_08G018800	2129	4.93	2.07	164	57.6667	-1.36713	down	3.43786e-07	6.33688e-06	At5g41590	--
GLYMA_08G021000	4952	2.08333	1.05667	177	73.6667	-1.10792	down	0.000477999	0.00415977	--	--
GLYMA_08G021900	2224	21.9733	115.437	871.667	3886.33	2.2884	up	5.83229e-15	2.91106e-13	At4g23810	K13425 WRKY transcription factor 22 | (RefSeq) WRKY transcription factor 22 (A)
GLYMA_08G024700	3622	4.43	1.71	171.667	55.3333	-1.47792	down	0.000257472	0.0024357	At5g46290	K09458 3-oxoacyl-[acyl-carrier-protein] synthase II [EC:2.3.1.179] | (RefSeq) 3-oxoacyl-[acyl-carrier-protein] synthase I, chloroplastic isoform X4 (A)
GLYMA_08G025500	3711	6.47333	3.23	348.667	148.667	-1.10628	down	8.21882e-07	1.39997e-05	At3g23920	K01177 beta-amylase [EC:3.2.1.2] | (RefSeq) beta-amylase 1, chloroplastic (A)
GLYMA_08G026300	4636	7.50667	16.95	473	897.333	1.06481	up	9.08361e-08	1.86785e-06	At5g24320	K20241 WD repeat-containing protein 44 | (RefSeq) WD repeat-containing protein 44 (A)
GLYMA_08G027000	7435	24.5633	10.42	1485.33	537	-1.34649	down	4.08215e-11	1.3101e-09	At2g07050	K20659 lupeol synthase [EC:5.4.99.41] | (RefSeq) lupeol synthase isoform X1 (A)
GLYMA_08G028000	8679	1.34667	3.04333	107	209.667	1.08738	up	0.000804377	0.00648877	At4g12750	--
GLYMA_08G031400	2133	10.85	3.84333	475	139.333	-1.61805	down	5.15063e-10	1.45216e-08	At2g19810	K23048 RING finger protein unkempt | (RefSeq) zinc finger CCCH domain-containing protein (A)
GLYMA_08G032200	3141	2.58	0.89	103.333	31.6667	-1.62189	down	4.0399e-05	0.00047871	At4g29310	--
GLYMA_08G032800	1026	36.6267	6.16333	685	93.3333	-2.69307	down	1.22445e-13	5.28235e-12	At5g56550	--
GLYMA_08G034500	2605	1.16	2.68667	50.6667	97	1.08513	up	0.000424527	0.00375632	--	--
GLYMA_08G035000	1507	4.71	11.7167	139.333	296.667	1.21066	up	0.000316197	0.00291386	At5g11590	K09286 EREBP-like factor | (RefSeq) ethylene-responsive transcription factor TINY (A)
GLYMA_08G036700	1011	1.10667	3.78	13.3333	37.6667	1.62974	up	0.00880621	0.0457982	--	--
GLYMA_08G039400	2865	6.37333	13.8333	341.667	668.333	1.04012	up	0.0051801	0.0300836	At3g24480	--
GLYMA_08G040800	1391	16.3367	4.07667	476	95.3333	-2.13358	down	8.13148e-11	2.54544e-09	At1g13350	--
GLYMA_08G041500	3501	1.79333	0.253333	49.6667	5.66667	-2.96175	down	2.31813e-07	4.42494e-06	At3g18400	--
GLYMA_08G042600	3137	6.34	15.6	218.667	459.333	1.19179	up	1.07583e-07	2.18603e-06	At2g01660	--
GLYMA_08G043000	3706	93.1267	42.19	4696.33	1781.33	-1.25742	down	1.67323e-10	5.00511e-09	At3g17860	K13464 jasmonate ZIM domain-containing protein | (RefSeq) uncharacterized protein LOC100787821 (A)
GLYMA_08G043800	1491	30.2833	12.3067	913	311	-1.41415	down	4.98514e-15	2.50277e-13	At1g14890	K01051 pectinesterase [EC:3.1.1.11] | (RefSeq) pectinesterase (A)
GLYMA_08G044400	4279	13.56	60.86	565	2147	2.06441	up	1.51165e-20	1.21854e-18	At1g73800	--
GLYMA_08G045300	943	34.6533	14.9133	685	237.333	-1.35002	down	1.81773e-05	0.000232654	At1g67920	--
GLYMA_08G049000	7363	5.60333	14.57	538.333	1220.67	1.28248	up	2.75512e-07	5.16716e-06	At5g35750	K14489 arabidopsis histidine kinase 2/3/4 (cytokinin receptor) [EC:2.7.13.3] | (RefSeq) histidine kinase 4 (A)
GLYMA_08G053500	1334	543.517	244.367	14780.3	5488.33	-1.27098	down	2.47333e-08	5.57311e-07	At1g73630	K13448 calcium-binding protein CML | (RefSeq) calcium-binding allergen Ole e 8 (A)
GLYMA_08G056100	3990	4.02667	8.95	242.333	462	1.05016	up	1.67548e-07	3.28028e-06	At3g02050	K03549 KUP system potassium uptake protein | (RefSeq) potassium transporter 25 (A)
GLYMA_08G058900	1451	71.9733	18.1867	1807.33	372	-2.10769	down	2.81422e-16	1.57138e-14	At1g61340	--
GLYMA_08G059700	3684	312.933	70.3133	11945.7	2216.67	-2.27056	down	1.89867e-23	1.91765e-21	At1g11260	K24193 MFS transporter, SP family, sugar:H+ symporter | (RefSeq) sugar carrier protein C (A)
GLYMA_08G061100	2420	1.73667	4.16333	84.6667	170.333	1.14783	up	5.3788e-06	7.7903e-05	At4g21350	K09561 STIP1 homology and U-box containing protein 1 [EC:2.3.2.27] | (RefSeq) E3 ubiquitin-protein ligase CHIP (A)
GLYMA_08G062700	2650	3.98667	15.1333	177.333	559.667	1.80578	up	4.12334e-16	2.26191e-14	At5g48380	K13415 protein brassinosteroid insensitive 1 [EC:2.7.10.1 2.7.11.1] | (RefSeq) BRI1A; brassinosteroid receptor precursor (A)
GLYMA_08G062800	2779	2.78667	11.2033	111.667	365.333	1.88063	up	4.2799e-11	1.36845e-09	At5g48380	K13415 protein brassinosteroid insensitive 1 [EC:2.7.10.1 2.7.11.1] | (RefSeq) BRI1B; brassinosteroid receptor precursor (A)
GLYMA_08G064400	1542	5.48333	0.166667	168.667	4.33333	-5.15784	down	1.35749e-25	1.56957e-23	--	--
GLYMA_08G065800	3164	1.35333	0.516667	84	27.6667	-1.4916	down	4.21172e-05	0.000496671	At5g10530	K13416 brassinosteroid insensitive 1-associated receptor kinase 1 [EC:2.7.10.1 2.7.11.1] | (RefSeq) BRASSINOSTEROID INSENSITIVE 1-associated receptor kinase 1 (A)
GLYMA_08G068100	6795	3.61	0.163333	178.667	6.66667	-4.60468	down	1.99276e-26	2.40956e-24	At5g09550	K17255 Rab GDP dissociation inhibitor | (RefSeq) guanosine nucleotide diphosphate dissociation inhibitor At5g09550 isoform X2 (A)
GLYMA_08G068200	10352	25.3533	10.7733	830.333	295.667	-1.35187	down	2.41413e-10	7.06143e-09	At2g22540	K09264 MADS-box transcription factor, plant | (RefSeq) MADS-box transcription factor 23 isoform X5 (A)
GLYMA_08G069500	1095	1.09667	2.90667	20	43.3333	1.27306	up	0.00636169	0.0356089	At1g58120	--
GLYMA_08G072400	15447	13.6033	5.37667	1217	411.667	-1.44202	down	2.86752e-13	1.19503e-11	At4g33520	K17686 P-type Cu+ transporter [EC:7.2.2.8] | (RefSeq) copper-transporting ATPase PAA1, chloroplastic (A)
GLYMA_08G075300	1933	0.81	0.2	23.6667	4.66667	-2.17018	down	0.00235372	0.0160689	At5g64530	--
GLYMA_08G076000	978	1.16333	5.26667	24.3333	87.6667	2.01668	up	0.000148386	0.00150046	At3g43660	K22736 vacuolar iron transporter family protein | (RefSeq) vacuolar iron transporter homolog 4 (A)
GLYMA_08G076100	666	0.866667	4.07333	12	47	2.1002	up	0.00739732	0.0400479	At3g43660	K22736 vacuolar iron transporter family protein | (RefSeq) vacuolar iron transporter homolog 4 (A)
GLYMA_08G076400	3845	0.373333	0.1	23.6667	5.33333	-1.99968	down	0.00225843	0.015542	At1g43710	K25193 serine decarboxylase [EC:4.1.1.-] | (RefSeq) aspartate aminotransferase superfamily protein (A)
GLYMA_08G078500	2110	2.59	1.32333	112.333	47	-1.09398	down	0.00108493	0.00839107	At1g07090	--
GLYMA_08G078900	1236	4.45333	0.64	107.333	13.3333	-2.90207	down	1.59349e-13	6.79758e-12	At5g06860	--
GLYMA_08G079100	1110	28.1567	12.7433	630.667	238	-1.25653	down	6.22043e-08	1.31291e-06	At5g06870	--
GLYMA_08G080900	2170	0.86	1.98667	37.3333	73.3333	1.09995	up	0.00155298	0.0113443	At1g30760	K22395 cinnamyl-alcohol dehydrogenase [EC:1.1.1.195] | (RefSeq) berberine bridge enzyme-like 13 (A)
GLYMA_08G082200	8081	0.966667	2.09667	43.3333	79.3333	1.01203	up	0.00200904	0.0140638	At4g18160	K05389 potassium channel subfamily K, other eukaryote | (RefSeq) two-pore potassium channel 3 isoform X2 (A)
GLYMA_08G083300	5303	8.86333	0.99	776	76.3333	-3.25261	down	9.62343e-25	1.07295e-22	At5g46330	K13420 LRR receptor-like serine/threonine-protein kinase FLS2 [EC:2.7.11.1] | (RefSeq) LRR receptor-like serine/threonine-protein kinase FLS2 (A)
GLYMA_08G083400	2331	14.25	2.5	449.667	67.3333	-2.61349	down	1.68823e-28	2.30055e-26	At3g05740	K10899 ATP-dependent DNA helicase Q1 [EC:3.6.4.12] | (RefSeq) ATP-dependent DNA helicase Q-like 1 (A)
GLYMA_08G083500	2910	8.41333	3.98	160.667	65.3333	-1.18133	down	6.22314e-06	8.8453e-05	At3g05740	K10899 ATP-dependent DNA helicase Q1 [EC:3.6.4.12] | (RefSeq) ATP-dependent DNA helicase Q-like 1 (A)
GLYMA_08G090000	4719	0.71	2.45667	63.3333	192.333	1.7055	up	1.27687e-09	3.40961e-08	At4g20140	K00924 kinase [EC:2.7.1.-] | (RefSeq) NARK; nodule autoregulation receptor kinase precursor (A)
GLYMA_08G093100	2102	1.41333	3.20333	50	95	1.06187	up	0.000400944	0.00357436	At3g51550	K13430 serine/threonine-protein kinase PBS1 [EC:2.7.11.1] | (RefSeq) serine/threonine-protein kinase (A)
GLYMA_08G094800	4132	4.20667	9.68333	181.667	350.667	1.09113	up	1.1164e-06	1.86283e-05	At1g70740	K13430 serine/threonine-protein kinase PBS1 [EC:2.7.11.1] | (RefSeq) probable serine/threonine-protein kinase PBL7 (A)
GLYMA_08G094900	4484	8.66333	4.18667	737.333	303.333	-1.15581	down	2.42336e-10	7.08238e-09	At1g70750	--
GLYMA_08G095900	2158	62.6867	33.6767	1799.33	799	-1.01826	down	6.83107e-05	0.000762363	At1g70780	--
GLYMA_08G098500	4789	0.913333	2.83333	39.6667	104.667	1.52495	up	4.88225e-07	8.69136e-06	At1g30220	K08150 MFS transporter, SP family, solute carrier family 2 (myo-inositol transporter), member 13 | (RefSeq) probable inositol transporter 2 isoform X1 (A)
GLYMA_08G099800	3034	1.07667	4.1	26.3333	81.6667	1.79615	up	2.63004e-06	4.08853e-05	--	--
GLYMA_08G099900	3926	14.4367	5.86	669.667	227	-1.41656	down	3.23353e-11	1.05451e-09	At1g30320	--
GLYMA_08G100700	2669	12.96	6.96667	388.333	173.667	-1.01565	down	0.000280733	0.00262537	At1g24440	--
GLYMA_08G100900	2830	3.43	7.89667	141	277	1.09224	up	0.000263896	0.00248756	At1g67710	K14491 two-component response regulator ARR-B family | (RefSeq) two-component response regulator ARR11 isoform X3 (A)
GLYMA_08G101800	3574	0.616667	1.67333	33	76.6667	1.33978	up	4.14254e-05	0.000489353	At3g01750	--
GLYMA_08G105000	7890	96.2433	50.8133	9197.67	4184	-1.02159	down	4.75107e-06	6.98424e-05	At1g27320	K14489 arabidopsis histidine kinase 2/3/4 (cytokinin receptor) [EC:2.7.13.3] | (RefSeq) histidine kinase 3 (A)
GLYMA_08G106900	540	8.11	25.8567	90	235.667	1.54278	up	1.68972e-07	3.30249e-06	--	--
GLYMA_08G107300	2631	78.9033	40.0767	1914.33	801.333	-1.10193	down	1.24743e-06	2.06442e-05	At3g23730	K08235 xyloglucan:xyloglucosyl transferase [EC:2.4.1.207] | (RefSeq) xyloglucan endotransglucosylase/hydrolase 2 precursor (A)
GLYMA_08G109300	3819	3.84667	10.0467	281	628	1.28079	up	2.59885e-09	6.64515e-08	At5g13930	K00660 chalcone synthase [EC:2.3.1.74] | (RefSeq) CHS3C; chalcone synthase 3 (A)
GLYMA_08G110900	1505	1.55	3.78333	44	88.6667	1.15792	up	0.000327239	0.00300385	At5g13930	K00660 chalcone synthase [EC:2.3.1.74] | (RefSeq) CHS3C; chalcone synthase 3 (A)
GLYMA_08G112800	744	7.79333	22.47	119.333	284	1.39888	up	5.16835e-07	9.16741e-06	--	--
GLYMA_08G116800	3964	0.696667	1.89	48	114.333	1.35482	up	0.000380279	0.00341585	At1g29240	--
GLYMA_08G117300	4155	5.77333	2.75	245.333	98.3333	-1.18402	down	3.09145e-07	5.76333e-06	At2g34200	--
GLYMA_08G118000	2212	4.51	21.9467	207	822.667	2.15404	up	2.72258e-14	1.25635e-12	At2g42760	--
GLYMA_08G118800	1984	10.84	3.43	240	63	-1.7849	down	2.84943e-09	7.26426e-08	At2g29420	K00799 glutathione S-transferase [EC:2.5.1.18] | (RefSeq) tau class glutathione S-transferase (A)
GLYMA_08G119900	5135	5.35333	2.39667	546.667	203.667	-1.27698	down	4.11916e-09	1.02949e-07	At4g18880	K09419 heat shock transcription factor, other eukaryote | (RefSeq) HSF-13; heat stress transcription factor 13 (A)
GLYMA_08G122200	13230	6.33333	18.3067	615.333	1465.67	1.41222	up	2.43203e-07	4.61415e-06	At2g25740_1	--
GLYMA_08G125800	3864	7.95	23.5	475.667	1167.33	1.44538	up	7.60717e-13	3.0061e-11	At3g16030	K13430 serine/threonine-protein kinase PBS1 [EC:2.7.11.1] | (RefSeq) serine/threonine protein kinase (A)
GLYMA_08G128100	1164	10.3167	34.1033	172.333	450.667	1.57969	up	3.62512e-05	0.000433546	At2g02850	--
GLYMA_08G129000	7847	1.72333	4.52	132.667	298.667	1.28787	up	4.66448e-07	8.33393e-06	At4g20430	--
GLYMA_08G129300	1270	24.1833	12.9767	425.667	187	-1.01642	down	0.000642887	0.00533303	At4g20390	--
GLYMA_08G129600	3676	12.8467	4.63333	570	177.667	-1.56918	down	2.68575e-12	9.89577e-11	At4g21120	K03294 basic amino acid/polyamine antiporter, APA family | (RefSeq) cationic amino acid transporter 1 (A)
GLYMA_08G131200	2850	1.16667	3.17667	66.3333	152.667	1.33756	up	1.15268e-06	1.91685e-05	At3g55270	K14165 atypical dual specificity phosphatase [EC:3.1.3.16 3.1.3.48] | (RefSeq) dual specificity protein phosphatase PHS1 (A)
GLYMA_08G132300	2945	9.56	27.94	487.667	1177	1.43116	up	3.19337e-09	8.0801e-08	At1g67880	K00737 beta-1,4-mannosyl-glycoprotein beta-1,4-N-acetylglucosaminyltransferase [EC:2.4.1.144] | (RefSeq) putative beta-1,4-mannosyl-glycoprotein 4-beta-N-acetylglucosaminyltransferase (A)
GLYMA_08G132400	974	9.25333	21.84	178.667	347.667	1.1165	up	1.82153e-05	0.000233053	At4g40080	K20043 clathrin coat assembly protein AP180 | (RefSeq) putative clathrin assembly protein At4g40080 (A)
GLYMA_08G137500	2951	116.94	14.03	4013.67	400	-3.17684	down	2.36205e-54	1.55986e-51	At5g65140	K01087 trehalose 6-phosphate phosphatase [EC:3.1.3.12] | (RefSeq) probable trehalose-phosphate phosphatase J (A)
GLYMA_08G139200	1662	1.38333	0.503333	43	13.3333	-1.57257	down	0.00820418	0.0433233	At4g39700	K07213 copper chaperone | (RefSeq) copper transport protein ATX1 (A)
GLYMA_08G139800	1037	160.897	7.43667	3392.67	131.333	-4.55611	down	3.17247e-69	4.53928e-66	--	--
GLYMA_08G141900	741	6.35667	63.8733	95.6667	796	3.21281	up	9.53584e-36	2.22763e-33	--	--
GLYMA_08G142400	3329	1.50667	6.78667	32	121	2.06078	up	2.5967e-10	7.56966e-09	At5g26170	K18835 WRKY transcription factor 2 | (RefSeq) WRKY59; probable WRKY transcription factor 2 (A)
GLYMA_08G144600	5268	2.65667	1.32	201.333	84	-1.12438	down	1.70029e-06	2.74663e-05	At4g39380	--
GLYMA_08G145300	1782	119.307	1.26333	3292.67	29	-6.67946	down	5.56264e-155	1.91021e-150	At5g64750	K09286 EREBP-like factor | (RefSeq) APETALA2/ethylene responsive factor-like protein (A)
GLYMA_08G146200	4018	31.17	16.44	1156.33	518	-1.03143	down	4.25463e-09	1.05796e-07	--	--
GLYMA_08G146600	897	37.6233	8.51333	686.333	129.667	-2.25775	down	1.28167e-20	1.04543e-18	At1g49210	K19040 E3 ubiquitin-protein ligase ATL10/75/76/77/78 [EC:2.3.2.27] | (RefSeq) RING-H2 finger protein (A)
GLYMA_08G147200	1859	12.1067	5.16667	447.667	161.667	-1.33751	down	1.14764e-07	2.3155e-06	At5g64660	--
GLYMA_08G147700	1517	10.85	3.68667	268	75.6667	-1.68308	down	1.9017e-08	4.35945e-07	At2g38820	--
GLYMA_08G147900	2633	6.95667	3.6	269	121.333	-1.05051	down	0.000197636	0.00193412	At5g09760	K01051 pectinesterase [EC:3.1.1.11] | (RefSeq) pectinesterase 2 (A)
GLYMA_08G148700	3127	1.76	0.736667	88.6667	32	-1.35717	down	5.302e-05	0.000609339	At5g64270	K12828 splicing factor 3B subunit 1 | (RefSeq) LOW QUALITY PROTEIN: splicing factor 3B subunit 1 (A)
GLYMA_08G148800	2607	39.52	11.9267	1326	334.333	-1.83943	down	1.30305e-15	6.86299e-14	At5g06710	K09338 homeobox-leucine zipper protein | (RefSeq) homeobox-leucine zipper protein HOX11 (A)
GLYMA_08G151100	1373	5.94333	24.5467	166.333	566.667	1.92815	up	8.00638e-13	3.15297e-11	--	--
GLYMA_08G152500	3170	617.51	31.1667	28197	1190.67	-4.42271	down	1.61834e-50	8.68339e-48	At2g42280	K12126 phytochrome-interacting factor 3 | (RefSeq) transcription factor PIF3 (A)
GLYMA_08G153700	709	410.32	170.49	5980.33	2038.67	-1.39164	down	3.94482e-08	8.61218e-07	--	--
GLYMA_08G156300	3632	1.24667	0	55	0	-8.12883	down	1.53648e-10	4.61213e-09	CE29003	--
GLYMA_08G157800	4919	17.61	8.77	754	314.667	-1.11881	down	1.5457e-09	4.08617e-08	At2g31950	K03639 GTP 3',8-cyclase [EC:4.1.99.22] | (RefSeq) GTP 3',8-cyclase, mitochondrial isoform X1 (A)
GLYMA_08G157900	1218	2.10333	0.313333	53.3333	6.33333	-2.89765	down	2.51786e-07	4.76383e-06	At2g42140	--
GLYMA_08G158500	1163	40.5333	14.77	969.333	290.667	-1.57591	down	1.15934e-10	3.53283e-09	At2g31940	--
GLYMA_08G161400	6331	0.496667	1.23	23.6667	50.3333	1.21104	up	0.00191084	0.0135017	At5g44600	--
GLYMA_08G163600	2263	0.743333	0.146667	30.3333	5	-2.45023	down	8.10658e-05	0.000884588	At2g44260	--
GLYMA_08G164400	2530	0.346667	2.33	9.66667	58	2.68621	up	5.56928e-08	1.18494e-06	At3g12750	K14709 solute carrier family 39 (zinc transporter), member 1/2/3 | (RefSeq) zinc transporter 1 (A)
GLYMA_08G168300	417	90.3833	45.38	770	320	-1.1132	down	2.70876e-07	5.09413e-06	At3g12830	K14488 SAUR family protein | (RefSeq) auxin-responsive protein SAUR71 (A)
GLYMA_08G169100	2348	0.37	6.16667	9.66667	136.667	3.93488	up	1.05928e-09	2.87329e-08	At3g12900	K23145 scopoletin 8-hydroxylase [EC:1.14.11.60] | (RefSeq) uncharacterized protein LOC100803722 (A)
GLYMA_08G169300	3579	0.833333	2.28	21.6667	49.6667	1.33577	up	0.00544974	0.0313579	At3g12900	K23145 scopoletin 8-hydroxylase [EC:1.14.11.60] | (RefSeq) scopoletin 8-hydroxylase (A)
GLYMA_08G169800	2335	12.1733	27.3	435.667	787	1.03038	up	0.00850475	0.0445678	At3g07720	K15450 tRNA wybutosine-synthesizing protein 3 [EC:2.1.1.282] | (RefSeq) tRNA wybutosine-synthesizing protein 2/3/4 isoform X1 (A)
GLYMA_08G170400	2045	13.1533	2.02	486	62	-2.82201	down	4.66042e-30	7.54899e-28	At3g12920	K19042 E3 ubiquitin-protein ligase BOI and related proteins [EC:2.3.2.27] | (RefSeq) probable BOI-related E3 ubiquitin-protein ligase 3 (A)
GLYMA_08G173100	2530	20.4133	5.47	1027.67	235	-2.01029	down	4.88998e-21	4.10567e-19	At1g79060	--
GLYMA_08G174800	4157	1.52333	0.8	123.667	56.3333	-1.02494	down	0.000724596	0.00590616	At1g73710	K00962 polyribonucleotide nucleotidyltransferase [EC:2.7.7.8] | (RefSeq) polyribonucleotide nucleotidyltransferase 1, chloroplastic (A)
GLYMA_08G176300	1749	1.24667	6.19333	33	144	2.2331	up	2.38469e-09	6.14791e-08	At3g14440	K09840 9-cis-epoxycarotenoid dioxygenase [EC:1.13.11.51] | (RefSeq) 9-cis-epoxycarotenoid dioxygenase NCED1, chloroplastic (A)
GLYMA_08G177000	1212	5.3	2.17	128	44.6667	-1.39588	down	9.46026e-07	1.59482e-05	At1g72220	K10664 E3 ubiquitin-protein ligase ATL6/9/15/31/42/55 [EC:2.3.2.27] | (RefSeq) E3 ubiquitin-protein ligase ATL42-like precursor (A)
GLYMA_08G177300	5696	8.54333	19.6367	370.333	720.333	1.09201	up	1.25289e-07	2.50871e-06	At5g64300	K14652 3,4-dihydroxy 2-butanone 4-phosphate synthase / GTP cyclohydrolase II [EC:4.1.99.12 3.5.4.25] | (RefSeq) bifunctional riboflavin biosynthesis protein RIBA 1, chloroplastic (A)
GLYMA_08G177500	4714	2.58667	5.99	82.6667	157.333	1.08325	up	0.000438981	0.00386727	At5g12200	K01464 dihydropyrimidinase [EC:3.5.2.2] | (RefSeq) dihydropyrimidinase isoform X2 (A)
GLYMA_08G180400	5276	1.93667	4.29333	98.3333	185.333	1.04534	up	0.00511257	0.0297973	At4g08620	K17470 sulfate transporter 1, high-affinity | (RefSeq) high affinity sulfate transporter 2 (A)
GLYMA_08G183600	2125	15.9867	6.53667	331.667	113.667	-1.40587	down	6.82237e-11	2.15133e-09	At1g03970	K14432 ABA responsive element binding factor | (RefSeq) BZIP81; transcription factor bZIP81 (A)
GLYMA_08G187400	3428	10.5133	3.10667	721.667	180.667	-1.86569	down	7.31802e-14	3.24259e-12	At1g11050	K13416 brassinosteroid insensitive 1-associated receptor kinase 1 [EC:2.7.10.1 2.7.11.1] | (RefSeq) BRASSINOSTEROID INSENSITIVE 1-associated receptor kinase 1 (A)
GLYMA_08G189500	5879	157.097	69.8867	9411.33	3508	-1.28267	down	3.53127e-08	7.74354e-07	At1g55020	K15718 linoleate 9S-lipoxygenase [EC:1.13.11.58] | (RefSeq) seed linoleate 9S-lipoxygenase (A)
GLYMA_08G192800	1612	1.33	0.66	43.3333	18	-1.12851	down	0.00889273	0.0461642	At4g12010	--
GLYMA_08G192900	5708	0.226667	1.18	22.6667	98.6667	2.27268	up	1.28112e-05	0.00016989	At5g17680	K13457 disease resistance protein RPM1 | (RefSeq) disease resistance protein RPM1 (A)
GLYMA_08G195000	2224	2.87333	0.866667	78	21	-1.80846	down	6.23802e-05	0.000703493	At1g17710	K13248 pyridoxal phosphate phosphatase PHOSPHO2 [EC:3.1.3.74] | (RefSeq) inorganic pyrophosphatase 2 (A)
GLYMA_08G195100	2372	54.04	19.66	1384	423.333	-1.56597	down	9.75816e-09	2.319e-07	At1g17710	K13248 pyridoxal phosphate phosphatase PHOSPHO2 [EC:3.1.3.74] | (RefSeq) ACP1; acid phosphatase ACP1 (A)
GLYMA_08G196600	817	1.59333	4.30667	26.6667	59.6667	1.30808	up	0.00060248	0.00506095	--	--
GLYMA_08G196700	8808	2.92333	1.51333	228.667	101.667	-1.05653	down	4.12365e-05	0.000487289	At1g73020	K19327 anoctamin-10 | (RefSeq) anoctamin-like protein At1g73020 isoform X1 (A)
GLYMA_08G199800	5024	1.98333	1.05	69.3333	30.6667	-1.03135	down	0.00718864	0.0391838	At4g32840	K00850 6-phosphofructokinase 1 [EC:2.7.1.11] | (RefSeq) ATP-dependent 6-phosphofructokinase 3 (A)
GLYMA_08G200500	5220	93.7	40.4067	5645.67	2078	-1.31836	down	4.40222e-13	1.78269e-11	At4g32850	K14376 poly(A) polymerase [EC:2.7.7.19] | (RefSeq) nuclear poly(A) polymerase 4 (A)
GLYMA_08G201400	2001	0.886667	1.92667	27.6667	52.6667	1.03718	up	0.00727964	0.0395292	At1g79760	K04124 gibberellin 3beta-dioxygenase [EC:1.14.11.15] | (RefSeq) gibberellin 3-beta-dioxygenase 1 (A)
GLYMA_08G202100	1175	5.13	10.9467	100.333	188.667	1.00322	up	0.00159271	0.0115999	At4g32890	--
GLYMA_08G202300	1512	1.00667	2.81	30	72	1.3861	up	6.28992e-05	0.000708435	At5g11590	K09286 EREBP-like factor | (RefSeq) dehydration-responsive element-binding protein 3 (A)
GLYMA_08G203300	1246	3.15333	1.07667	79.6667	22.6667	-1.66723	down	4.56732e-06	6.73719e-05	At3g27750	K01183 chitinase [EC:3.2.1.14] | (RefSeq) uncharacterized protein LOC100781412 (A)
GLYMA_08G207700	1752	7.47333	2.47667	264.667	73.3333	-1.70991	down	1.975e-12	7.38795e-11	At1g80440	--
GLYMA_08G207900	4451	0.553333	0.163333	21.3333	5.33333	-1.87256	down	0.00394867	0.0242961	At3g15540	K14484 auxin-responsive protein IAA | (RefSeq) AUX22; auxin-induced protein AUX22 (A)
GLYMA_08G208700	2237	3.41667	8.36667	153	316.333	1.18533	up	6.60115e-07	1.14026e-05	At1g80310	--
GLYMA_08G210200	2032	2.06	4.53333	60	113.333	1.03476	up	0.0018745	0.0132861	At3g15680	--
GLYMA_08G210800	1107	21.36	10.24	495	191.667	-1.18848	down	9.42167e-05	0.00100541	At1g15400	--
GLYMA_08G211700	3625	192.493	91.76	9113	3670.33	-1.17901	down	6.00101e-15	2.99092e-13	At3g15730	K01115 phospholipase D1/2 [EC:3.1.4.4] | (RefSeq) phospholipase D alpha 1 (A)
GLYMA_08G212900	2271	3.25333	0.283333	120.333	8.66667	-3.65721	down	3.44801e-18	2.27701e-16	At3g15850	K20416 palmitoyl-[glycerolipid] 7-desaturase [EC:1.14.19.42] | (RefSeq) FAD5.2; delta-7 desaturase (A)
GLYMA_08G214800	1572	0.78	2.97	15	48.3333	1.81624	up	8.9703e-05	0.000963264	At1g80520	--
GLYMA_08G215200	1695	0.77	2.90667	26.6667	84.3333	1.79204	up	3.6246e-05	0.000433546	At3g02650_1	--
GLYMA_08G216600	1409	0.266667	1.35333	7	28	2.17886	up	0.000638487	0.00531402	At5g25190	K09286 EREBP-like factor | (RefSeq) ethylene-responsive transcription factor 3 (A)
GLYMA_08G216800	2188	5.13667	19.6233	130.667	416.667	1.81326	up	1.00737e-13	4.38443e-12	At1g80690	K22763 deubiquitinase DESI2 [EC:3.4.19.12] | (RefSeq) deSI-like protein At4g17486 isoform X1 (A)
GLYMA_08G217300	537	4.72	1.58667	40.6667	12	-1.65839	down	0.00265001	0.0176633	--	--
GLYMA_08G220000	1575	66.62	19.4267	1798.33	435.667	-1.90032	down	1.2924e-10	3.92059e-09	At1g80920	--
GLYMA_08G220500	3403	98.67	27.7267	4489.33	1065.33	-1.94441	down	2.76318e-24	3.00277e-22	At2g24100	--
GLYMA_08G221300	2815	0.633333	1.60333	18	39.3333	1.24222	up	0.00685731	0.0378829	At1g51550	K12115 clock-associated PAS protein ZTL | (RefSeq) ZTL1; PAS protein ZEITLUPE 1 (A)
GLYMA_08G226900	2882	1.81	3.92	50	91.3333	1.00482	up	0.00219908	0.0151945	At1g60560	--
GLYMA_08G232400	1031	55.7633	8.47667	1185	148	-2.84466	down	4.5378e-28	5.92502e-26	At2g44310	--
GLYMA_08G235600	4792	26.2633	12.98	1354.67	556.333	-1.13379	down	5.58196e-08	1.1869e-06	At1g16670	K13430 serine/threonine-protein kinase PBS1 [EC:2.7.11.1] | (RefSeq) serine/threonine protein kinase (A)
GLYMA_08G241200	1813	6.92333	1.82667	204	45.3333	-2.03463	down	2.05396e-14	9.67533e-13	At3g29240	--
GLYMA_08G241600	5726	0.91	2.01	50	97	1.05651	up	0.00245199	0.0166208	At5g15410	K05391 cyclic nucleotide gated channel, plant | (RefSeq) cyclic nucleotide-gated ion channel 2 isoform X1 (A)
GLYMA_08G242400	1578	2.01	0.813333	30.3333	10.6667	-1.39877	down	0.00733392	0.0397799	At3g50700	--
GLYMA_08G242700	1877	1.15333	2.55667	41	77.6667	1.04674	up	0.00290683	0.018999	At3g29310	--
GLYMA_08G246700	1717	7.97	27.9067	207.667	570.333	1.66153	up	2.22357e-05	0.000279391	At4g35160	K23053 flavonoid 4'-O-methyltransferase [EC:2.1.1.231] | (RefSeq) SOMT-2; flavonoid 4'-O-methyltransferase-like (A)
GLYMA_08G249700	3727	53.9	23.7133	2019.67	753	-1.29361	down	2.35682e-13	9.85479e-12	At3g02210	--
GLYMA_08G250300	1491	2.04333	0.103333	33.6667	1.33333	-4.45434	down	3.55246e-06	5.35519e-05	At3g29970	--
GLYMA_08G253600	2418	5.02667	2.41333	243	98.6667	-1.17141	down	6.63743e-07	1.14595e-05	At5g15710	--
GLYMA_08G253700	4354	1.13333	2.71333	40.6667	80	1.12832	up	0.00253082	0.0170208	At3g30380	K01076 abhydrolase domain-containing protein 17 [EC:3.1.2.22] | (RefSeq) alpha/beta hydrolase domain-containing protein 17C (A)
GLYMA_08G254000	4289	1.78667	3.91667	108.333	207.333	1.04349	up	0.000322032	0.00295921	At2g31400	K17710 pentatricopeptide repeat domain-containing protein 1 | (RefSeq) pentatricopeptide repeat-containing protein At2g18940, chloroplastic (A)
GLYMA_08G254200	3753	66.78	34.16	3160.67	1353.33	-1.08081	down	1.74102e-10	5.18083e-09	At3g30390	K14207 solute carrier family 38 (sodium-coupled neutral amino acid transporter), member 2 | (RefSeq) amino acid transporter AVT6A (A)
GLYMA_08G258100	6816	0.696667	1.79333	23	52.6667	1.28657	up	0.00280501	0.0184959	At2g30580	K16277 E3 ubiquitin-protein ligase DRIP [EC:2.3.2.27] | (RefSeq) E3 ubiquitin protein ligase DRIP2 (A)
GLYMA_08G260500	2502	23.5233	95.77	877.333	2942	1.90834	up	3.57748e-15	1.80929e-13	At1g13340	--
GLYMA_08G261200	5427	4.58333	1.59	122	35.3333	-1.64269	down	7.54996e-08	1.57226e-06	At3g25900	K00547 homocysteine S-methyltransferase [EC:2.1.1.10] | (RefSeq) homocysteine S-methyltransferase 1 isoform X1 (A)
GLYMA_08G261500	2540	4.54	2.45333	234.333	105	-1.00145	down	0.000625475	0.00522853	At1g68550	K13434 pathogenesis-related genes transcriptional activator PTI6 | (RefSeq) pathogenesis-related genes transcriptional activator PTI6 (A)
GLYMA_08G262400	1467	3.10667	7.33667	93.6667	181.667	1.1117	up	4.5059e-05	0.000528278	--	--
GLYMA_08G263800	3245	29.1067	15.2367	1468	650.333	-1.04376	down	5.62098e-10	1.57829e-08	At1g68580	--
GLYMA_08G268300	4669	0.476667	1.36667	44	108	1.41742	up	8.12516e-07	1.38608e-05	At3g16890	--
GLYMA_08G271900	2704	11.4033	53.6967	607.333	2454	2.13596	up	2.84843e-23	2.84346e-21	At1g32640	K13422 transcription factor MYC2 | (RefSeq) transcription factor MYC2 (A)
GLYMA_08G273400	2974	8.44	2.10333	466	98.3333	-2.11407	down	1.38812e-18	9.53363e-17	At4g37890	--
GLYMA_08G277100	4382	1.49333	3.41333	86.3333	162.667	1.06722	up	0.00016904	0.0016856	At4g15560	K01662 1-deoxy-D-xylulose-5-phosphate synthase [EC:2.2.1.7] | (RefSeq) probable 1-deoxy-D-xylulose-5-phosphate synthase 2, chloroplastic (A)
GLYMA_08G277200	1088	3.79	11.6	28.6667	77	1.52975	up	4.99519e-05	0.000578142	At5g49690	K18823 soyasaponin III rhamnosyltransferase [EC:2.4.1.273] | (RefSeq) SGT3; soyasaponin III rhamnosyltransferase (A)
GLYMA_08G281600	880	576.793	263.597	10266.7	3913.33	-1.24905	down	3.95916e-07	7.20702e-06	--	--
GLYMA_08G281800	1416	3.41	1.86	100.667	44.6667	-1.00656	down	0.00475853	0.0282273	At1g67910	--
GLYMA_08G282200	760	5.57667	1.77	61	16	-1.77827	down	3.35148e-05	0.000404676	--	K20892 beta-arabinofuranosyltransferase [EC:2.4.2.-] | (RefSeq) LOW QUALITY PROTEIN: uncharacterized protein LOC100788538 (A)
GLYMA_08G282300	4176	2.87667	1.13333	129.333	44	-1.44347	down	5.23339e-06	7.59892e-05	At1g70630	K20892 beta-arabinofuranosyltransferase [EC:2.4.2.-] | (RefSeq) LOW QUALITY PROTEIN: uncharacterized protein LOC100788538 (A)
GLYMA_08G285900	3266	210.327	55.7333	8960.67	1974	-2.03376	down	4.77588e-30	7.69971e-28	At1g60420	K17609 nucleoredoxin [EC:1.8.1.8] | (RefSeq) probable nucleoredoxin 1 (A)
GLYMA_08G293600	6648	0.1	0.47	10.3333	41.6667	2.13135	up	0.00109512	0.00846178	At1g27170	K13457 disease resistance protein RPM1 | (RefSeq) disease resistance protein RPM1 (A)
GLYMA_08G297900	3789	6.31333	17.2667	286.333	658	1.33935	up	9.75509e-14	4.26196e-12	At2g02800	K13430 serine/threonine-protein kinase PBS1 [EC:2.7.11.1] | (RefSeq) serine/threonine protein kinase (A)
GLYMA_08G298400	2472	5.84333	12.6333	178.667	339	1.01894	up	0.000112298	0.00117	At1g69780	K09338 homeobox-leucine zipper protein | (RefSeq) uncharacterized protein LOC100790840 (A)
GLYMA_08G299000	959	2.71333	5.98333	53.6667	97.3333	1.01154	up	0.00182535	0.0130236	At1g26920	--
GLYMA_08G301600	651	1.41667	6.84333	18.6667	75.6667	2.1542	up	2.21627e-08	5.05022e-07	--	--
GLYMA_08G302000	11357	1.45333	3.33	124.667	246.667	1.10027	up	0.000172424	0.00171624	At5g19420	K24810 inhibitor of Bruton tyrosine kinase | (RefSeq) uncharacterized protein LOC100814063 (A)
GLYMA_08G303700	4949	3.20333	8.63	275	643.667	1.33506	up	2.9752e-09	7.56243e-08	At5g41750	K13457 disease resistance protein RPM1 | (RefSeq) disease resistance protein RPM1 (A)
GLYMA_08G306100	1639	0.37	1.19333	11.6667	33.3333	1.61001	up	0.00232062	0.0158998	At5g07900	K15032 mTERF domain-containing protein, mitochondrial | (RefSeq) transcription termination factor MTERF15, mitochondrial (A)
GLYMA_08G307600	2686	7.61667	17.0667	406.333	776.333	1.05919	up	2.22764e-07	4.27598e-06	At3g59080	K22683 aspartyl protease family protein [EC:3.4.23.-] | (RefSeq) aspartyl protease family protein 2 (A)
GLYMA_08G309100	4546	0.306667	1.31	13.6667	48.3333	1.96679	up	5.62872e-06	8.08408e-05	At1g29380	K19892 glucan endo-1,3-beta-glucosidase 4 [EC:3.2.1.39] | (RefSeq) glucan endo-1,3-beta-glucosidase 4 (A)
GLYMA_08G309900	8499	25.65	13.3433	1365.33	615.667	-1.04516	down	1.20266e-05	0.000160385	At3g58790	K20867 galacturonosyltransferase 12/13/14/15 [EC:2.4.1.-] | (RefSeq) probable galacturonosyltransferase 15 isoform X1 (A)
GLYMA_08G310800	9301	0.19	0.59	15.3333	42	1.55846	up	0.000665688	0.00549777	At3g58770	--
GLYMA_08G314400	2755	13.3533	6.15667	242.667	92.6667	-1.24507	down	7.169e-05	0.000794653	--	--
GLYMA_08G321100	6392	33.5467	99.3167	1243	3108	1.45404	up	6.38943e-11	2.01852e-09	At5g10770	K22683 aspartyl protease family protein [EC:3.4.23.-] | (RefSeq) aspartyl protease family protein 2 (A)
GLYMA_08G321200	3000	0.27	1.26667	9.33333	37.6667	2.13003	up	0.00840148	0.044148	At5g10770	K22683 aspartyl protease family protein [EC:3.4.23.-] | (RefSeq) aspartyl protease family protein 2 (A)
GLYMA_08G323400	1468	2.01333	4.91667	60	123	1.17105	up	0.000279326	0.00261506	At5g55380	--
GLYMA_08G323600	1047	5.65667	2.24333	117.667	39.6667	-1.44297	down	1.95733e-06	3.12336e-05	At5g55380	--
GLYMA_08G324800	4056	1.34	3.00333	59.6667	116.667	1.06976	up	0.00108537	0.00839259	At5g55500	K03714 glycoprotein 2-beta-D-xylosyltransferase [EC:2.4.2.38] | (RefSeq) beta-1,2-xylosyltransferase (A)
GLYMA_08G325900	3510	2.39333	8.60333	168.667	512	1.73268	up	2.00245e-13	8.40638e-12	At5g48150	K14494 DELLA protein | (RefSeq) DELLA protein DWARF8 (A)
GLYMA_08G326200	6621	0.103333	0.343333	10.3333	31.3333	1.69919	up	0.00186017	0.0132144	At3g13080	K05666 ATP-binding cassette, subfamily C (CFTR/MRP), member 2 | (RefSeq) ABC transporter C family member 3 isoform X1 (A)
GLYMA_08G326300	3861	0.296667	1.38	23	90.6667	2.11512	up	5.28207e-07	9.34499e-06	At3g13080	K05666 ATP-binding cassette, subfamily C (CFTR/MRP), member 2 | (RefSeq) ABC transporter C family member 3 isoform X1 (A)
GLYMA_08G327400	1810	11.53	4.24	426.667	129.667	-1.56167	down	7.27275e-11	2.28705e-09	At1g55920	K00640 serine O-acetyltransferase [EC:2.3.1.30] | (RefSeq) serine acetyltransferase 1, chloroplastic (A)
GLYMA_08G329300	1739	32.8867	8.64333	1175.33	255	-2.04817	down	2.60439e-18	1.74649e-16	At4g14540	K08065 nuclear transcription Y subunit beta | (RefSeq) nuclear transcription factor Y subunit B-3 (A)
GLYMA_08G329600	1153	9.54667	20.5567	211.667	401.333	1.01542	up	0.000217085	0.00209992	--	--
GLYMA_08G335500	3622	6.08	3.24	228.667	102.333	-1.02206	down	6.83962e-06	9.63777e-05	At5g19850_1	--
GLYMA_08G338100	2007	8.92667	21.1367	375.667	717.667	1.10918	up	0.000142823	0.00144976	At4g01070	K08237 hydroquinone glucosyltransferase [EC:2.4.1.218] | (RefSeq) hydroquinone glucosyltransferase (A)
GLYMA_08G338200	1857	5.48667	22.1833	203	698.333	1.9078	up	1.11032e-16	6.42974e-15	At4g01070	K08237 hydroquinone glucosyltransferase [EC:2.4.1.218] | (RefSeq) hydroquinone glucosyltransferase (A)
GLYMA_08G338800	1617	0.87	2.90667	31	79.6667	1.56956	up	0.00397386	0.0244075	At4g01070	K08237 hydroquinone glucosyltransferase [EC:2.4.1.218] | (RefSeq) hydroquinone glucosyltransferase (A)
GLYMA_08G338900	6080	0.16	1.23333	7.33333	46.3333	2.80294	up	5.73872e-05	0.000652758	At4g01070	K08237 hydroquinone glucosyltransferase [EC:2.4.1.218] | (RefSeq) hydroquinone glucosyltransferase (A)
GLYMA_08G346300	3359	38.7	14.5333	1961.67	646	-1.50881	down	1.89244e-08	4.34112e-07	At3g07340	K23050 phenylcoumaran benzylic ether reductase [EC:1.3.1.-] | (RefSeq) eugenol synthase 1 (A)
GLYMA_08G346400	4970	0.266667	0.626667	22.6667	45	1.11634	up	0.00870973	0.045402	At1g09040	--
GLYMA_08G346900	4760	3.47333	0.47	128.333	14.6667	-2.99689	down	9.20458e-14	4.04201e-12	At3g07310	--
GLYMA_08G347100	741	6.30667	1.88667	97.3333	24	-1.86723	down	0.000137449	0.00140268	--	--
GLYMA_08G352300	3627	3.12	7.46333	189	376.667	1.14507	up	0.000185509	0.00183162	At1g11350	K13415 protein brassinosteroid insensitive 1 [EC:2.7.10.1 2.7.11.1] | (RefSeq) BRI1B; brassinosteroid receptor precursor (A)
GLYMA_08G355200	3070	7.11333	0.306667	441.667	16	-4.64882	down	5.42668e-54	3.51608e-51	At5g24080	K13415 protein brassinosteroid insensitive 1 [EC:2.7.10.1 2.7.11.1] | (RefSeq) BRI1B; brassinosteroid receptor precursor (A)
GLYMA_08G356200	2983	0.793333	2.02333	34	76.3333	1.25511	up	0.00287527	0.0188393	At3g24750	--
GLYMA_08G357200	4097	1.08333	3.19	43.3333	111.667	1.46697	up	7.91571e-05	0.000865135	At3g24660	K13415 protein brassinosteroid insensitive 1 [EC:2.7.10.1 2.7.11.1] | (RefSeq) BRI1B; brassinosteroid receptor precursor (A)
GLYMA_08G360700	1200	0.436667	2.46	11	50.3333	2.34648	up	5.16982e-05	0.000596144	At5g50760	K14488 SAUR family protein | (RefSeq) auxin-responsive protein SAUR41 (A)
GLYMA_08G363600	6841	23.5933	9.98	1173	418	-1.35651	down	1.28276e-12	4.93836e-11	At5g27730	K10532 heparan-alpha-glucosaminide N-acetyltransferase [EC:2.3.1.78] | (RefSeq) heparan-alpha-glucosaminide N-acetyltransferase (A)
GLYMA_08G365900	4170	9.3	3.55667	376.333	125.333	-1.48408	down	2.40004e-07	4.55848e-06	At3g02570	K01809 mannose-6-phosphate isomerase [EC:5.3.1.8] | (RefSeq) mannose-6-phosphate isomerase 1 (A)
GLYMA_08G366200	4249	0.346667	1.08333	13	34	1.53367	up	0.00230229	0.0158002	At2g43370	K13155 U11/U12 small nuclear ribonucleoprotein 35 kDa protein | (RefSeq) U11/U12 small nuclear ribonucleoprotein 35 kDa protein (A)
GLYMA_09G003300	3178	18.9467	47.0633	865.333	1836.67	1.21014	up	1.8438e-10	5.46298e-09	At2g44500	K23280 rhamnogalacturonan I rhamnosyltransferase [EC:2.4.1.351] | (RefSeq) rhamnogalacturonan I rhamnosyltransferase 1 isoform X2 (A)
GLYMA_09G003700	2199	15.1267	2.73333	413.667	62.3333	-2.58503	down	8.80123e-19	6.14298e-17	At3g12160	K07904 Ras-related protein Rab-11A | (RefSeq) ras-related Rab-11 family protein (A)
GLYMA_09G003900	2413	11.3467	5.73	312.333	126.667	-1.12112	down	0.000721742	0.00588801	At1g62040	K08341 GABA(A) receptor-associated protein | (RefSeq) ATG8C; autophagy-related protein 8c (A)
GLYMA_09G005300	1290	0.516667	5.83333	13.3333	128	3.38858	up	1.70449e-19	1.29783e-17	At4g04480	--
GLYMA_09G006600	5394	7.29	21.44	298	735.667	1.44288	up	1.04363e-14	5.07626e-13	At1g11940	--
GLYMA_09G006700	1287	0.146667	2.05333	3.66667	45.3333	3.72514	up	2.42197e-05	0.000301124	At4g04480	--
GLYMA_09G009000	4478	8.72	1.22	355.667	43	-2.938	down	1.38643e-26	1.69431e-24	At4g22290_1	--
GLYMA_09G012200	3197	2.88	0.69	103.333	20	-2.19941	down	1.96151e-06	3.12857e-05	At2g35760	--
GLYMA_09G013400	3309	0.976667	0.486667	63.3333	27	-1.10882	down	0.00375911	0.0233348	At4g16390	--
GLYMA_09G014100	1536	6.59333	3.01333	214	77.6667	-1.26495	down	0.00176658	0.0126648	At4g14540	K08065 nuclear transcription Y subunit beta | (RefSeq) H4 superfamily (A)
GLYMA_09G016500	2202	3.29333	0.743333	55.3333	10.3333	-2.27524	down	5.65239e-06	8.11128e-05	--	--
GLYMA_09G016900	1547	0.836667	0.113333	26.6667	3	-3.00036	down	4.82498e-05	0.000561471	--	--
GLYMA_09G017200	3916	1.88333	5.12	80.3333	186	1.33711	up	4.70431e-07	8.40005e-06	At5g60710	--
GLYMA_09G018800	7475	4.02667	10.34	290.333	623	1.25387	up	0.00233948	0.0159972	At5g49760	K13430 serine/threonine-protein kinase PBS1 [EC:2.7.11.1] | (RefSeq) serine/threonine-protein kinase (A)
GLYMA_09G019900	1767	27.7367	8.65667	703.667	181	-1.79928	down	1.50276e-14	7.17212e-13	At4g19700	K19042 E3 ubiquitin-protein ligase BOI and related proteins [EC:2.3.2.27] | (RefSeq) BOI-related E3 ubiquitin-protein ligase 1 (A)
GLYMA_09G022000	2310	17.7367	8.49	687.333	281.667	-1.16334	down	6.90784e-08	1.4482e-06	At3g54950	--
GLYMA_09G022300	3213	10.2733	5.02	277	110.333	-1.15955	down	0.00200923	0.0140638	At5g06720	K00430 peroxidase [EC:1.11.1.7] | (RefSeq) Ep; peroxidase precursor (A)
GLYMA_09G022400	2631	28.38	63.6	803.667	1528	1.05035	up	1.83825e-05	0.00023493	At2g38380	K00430 peroxidase [EC:1.11.1.7] | (RefSeq) peroxidase 15-like protein precursor (A)
GLYMA_09G022500	2343	37.9933	100.69	1069.67	2481.33	1.31043	up	7.72017e-06	0.00010755	At5g06720	K00430 peroxidase [EC:1.11.1.7] | (RefSeq) peroxidase family protein precursor (A)
GLYMA_09G024900	5799	0.853333	2.05667	82	174.333	1.18563	up	0.00059277	0.00499527	At4g20940	K13418 somatic embryogenesis receptor kinase 1 [EC:2.7.10.1 2.7.11.1] | (RefSeq) somatic embryogenesis receptor kinase 2 (A)
GLYMA_09G027500	3241	0.803333	3.84333	43.3333	175	2.14951	up	5.01448e-12	1.7789e-10	At1g16260	K13418 somatic embryogenesis receptor kinase 1 [EC:2.7.10.1 2.7.11.1] | (RefSeq) somatic embryogenesis receptor kinase 2 (A)
GLYMA_09G029800	4196	10.6233	5.43333	561.333	245.667	-1.06559	down	5.88301e-05	0.000668064	At1g30650	K13425 WRKY transcription factor 22 | (RefSeq) WRKY transcription factor 22 (A)
GLYMA_09G032100	2429	46.3667	9.09	1441.67	234	-2.46825	down	8.11364e-24	8.34199e-22	At5g49620	K09422 transcription factor MYB, plant | (RefSeq) transcription factor MYB108 (A)
GLYMA_09G034700	1234	0.736667	3.51333	17.6667	73.6667	2.17176	up	8.92268e-08	1.83869e-06	--	--
GLYMA_09G037100	2434	1.22	3.04333	62.3333	125	1.18094	up	0.000721856	0.00588801	At4g16260	K19891 glucan endo-1,3-beta-glucosidase 1/2/3 [EC:3.2.1.39] | (RefSeq) glucan endo-1,3-beta-glucosidase 2 isoform X2 (A)
GLYMA_09G038600	6720	5.29	13.24	278.333	612.667	1.23282	up	1.01591e-06	1.7051e-05	At5g49360	K15920 xylan 1,4-beta-xylosidase [EC:3.2.1.37] | (RefSeq) beta-xylosidase/alpha-L-arabinofuranosidase 2 isoform X1 (A)
GLYMA_09G038800	2935	8.98667	3.72333	215.333	72	-1.39627	down	0.000690898	0.00566916	At5g49350	--
GLYMA_09G042400	1503	52.1333	143.783	1600	3637.67	1.34726	up	3.61277e-09	9.08217e-08	At3g16720	K10664 E3 ubiquitin-protein ligase ATL6/9/15/31/42/55 [EC:2.3.2.27] | (RefSeq) putative RING-H2 finger protein ATL12 (A)
GLYMA_09G043300	1477	1.21	3.35	35.3333	84.3333	1.35975	up	0.000435757	0.00384577	At5g49100	--
GLYMA_09G046100	4032	0.51	1.32	30	66.3333	1.25897	up	0.00147103	0.0108378	AtCh072	--
GLYMA_09G048400	1809	0.533333	1.73	10	27.6667	1.59579	up	0.00219417	0.015168	At1g30870	K00430 peroxidase [EC:1.11.1.7] | (RefSeq) peroxidase 7-like protein precursor (A)
GLYMA_09G048900	2033	0.533333	1.49	19.6667	45.6667	1.35567	up	0.00280278	0.0184938	At4g37360	K13260 isoflavone/4'-methoxyisoflavone 2'-hydroxylase [EC:1.14.14.90 1.14.14.89] | (RefSeq) isoflavone 2'-hydroxylase (A)
GLYMA_09G049100	2018	102.457	247.037	3896.33	7725	1.1481	up	1.01307e-07	2.07076e-06	At4g37360	K13260 isoflavone/4'-methoxyisoflavone 2'-hydroxylase [EC:1.14.14.90 1.14.14.89] | (RefSeq) CYP81E11; isoflavone 2'-hydroxylase-like (A)
GLYMA_09G049300	2027	1.27667	3.69	46.3333	114.333	1.42574	up	6.97842e-06	9.81322e-05	At4g37360	K13260 isoflavone/4'-methoxyisoflavone 2'-hydroxylase [EC:1.14.14.90 1.14.14.89] | (RefSeq) I2'H; isoflavone 2'-hydroxylase (A)
GLYMA_09G050700	4005	10.0833	3.55667	672.333	202	-1.60983	down	3.09452e-16	1.7223e-14	At5g44730	K20185 biogenesis of lysosome-related organelles complex 1 subunit 1 | (RefSeq) biogenesis of lysosome-related organelles complex 1 subunit 1-like (A)
GLYMA_09G052700	8713	3.97	8.75667	392	735.667	1.03592	up	2.37371e-07	4.52349e-06	At1g31120	K03549 KUP system potassium uptake protein | (RefSeq) potassium transporter 10 isoform X1 (A)
GLYMA_09G054600	10668	0.173333	0.506667	31	80	1.49146	up	0.000805162	0.00649348	At2g16670	K22733 magnesium transporter | (RefSeq) probable magnesium transporter NIPA4 (A)
GLYMA_09G054800	7892	1.02	2.71333	80.6667	189.667	1.32359	up	0.000634002	0.00528438	At3g54070	K22733 magnesium transporter | (RefSeq) probable magnesium transporter NIPA4 (A)
GLYMA_09G054900	4975	0.176667	0.73	14.6667	49.3333	1.90757	up	0.000627039	0.00523906	At3g18670	K22733 magnesium transporter | (RefSeq) probable magnesium transporter NIPA4 (A)
GLYMA_09G056600	1405	0.153333	2.43	4.33333	57.6667	3.87606	up	3.31746e-12	1.20044e-10	At4g30180	--
GLYMA_09G058000	5776	0.406667	1.27667	29.3333	77.3333	1.5325	up	8.55075e-06	0.000117688	At4g30130	--
GLYMA_09G058900	6683	18.0367	39.1333	607.667	1130	1.01201	up	1.72844e-07	3.37435e-06	At5g57240	K22285 oxysterol-binding protein-related protein 8 | (RefSeq) oxysterol-binding protein-related protein 4C isoform X1 (A)
GLYMA_09G060500	4744	0.726667	2.83333	50.6667	171.333	1.8743	up	7.47023e-10	2.06877e-08	At4g29920	K03695 ATP-dependent Clp protease ATP-binding subunit ClpB | (RefSeq) chaperone protein ClpB1 isoform X1 (A)
GLYMA_09G061500	4444	19.4467	8.35333	702.333	255	-1.3298	down	2.31556e-07	4.42249e-06	At2g19330	--
GLYMA_09G061900	2147	15.4833	68.8833	488.333	1829.67	2.04346	up	3.96756e-29	5.7977e-27	At2g24570	K13425 WRKY transcription factor 22 | (RefSeq) WRKY10; WRKY transcription factor 10 (A)
GLYMA_09G063000	2834	0.376667	1.24667	20.3333	60	1.66118	up	4.53278e-05	0.000530523	At4g29720	K12259 spermine oxidase [EC:1.5.3.16 1.5.3.-] | (RefSeq) probable polyamine oxidase 5 (A)
GLYMA_09G065000	4101	49.5433	122.723	2769.67	5875	1.20848	up	4.70111e-08	1.01214e-06	At2g26190	--
GLYMA_09G065300	23154	15.1233	3.1	755	131	-2.39527	down	8.83985e-38	2.42848e-35	At2g19450	K11155 diacylglycerol O-acyltransferase 1 [EC:2.3.1.20 2.3.1.75 2.3.1.76] | (RefSeq) DGAT; diacylglycerol O-acyltransferase 1C (A)
GLYMA_09G065400	725	4.88667	0.09	42.3333	0.666667	-5.89601	down	2.70776e-07	5.09413e-06	--	--
GLYMA_09G065800	2481	0.0866667	1.07	2.33333	23	3.461	up	7.37226e-05	0.000814177	At5g19890	K00430 peroxidase [EC:1.11.1.7] | (RefSeq) uncharacterized protein LOC100787073 precursor (A)
GLYMA_09G065900	1939	6.02667	2.74333	239.667	89.6667	-1.26262	down	0.00014532	0.00147206	At1g59970	K07999 matrix metalloproteinase-20 (enamelysin) [EC:3.4.24.-] | (RefSeq) metalloendoproteinase 4-MMP (A)
GLYMA_09G067900	1015	6.41	0.78	133	13.3333	-3.16651	down	1.97161e-16	1.12467e-14	At2g37580_1	K19038 E3 ubiquitin-protein ligase ATL41 [EC:2.3.2.27] | (RefSeq) RING-H2 finger protein ATL40 (A)
GLYMA_09G068700	2584	0.84	2.10667	27.6667	60.6667	1.23376	up	0.00338386	0.0214553	At3g13960	--
GLYMA_09G069500	3379	53.97	11.8933	1775	328.667	-2.29402	down	8.92905e-42	3.29703e-39	--	--
GLYMA_09G069900	3747	16.4933	48.42	681	1690.67	1.45668	up	8.17985e-06	0.000113128	At2g05940	K13430 serine/threonine-protein kinase PBS1 [EC:2.7.11.1] | (RefSeq) serine/threonine protein kinase (A)
GLYMA_09G071800	1377	49.9667	19.6467	1144.67	381.667	-1.4608	down	4.81969e-12	1.71511e-10	At5g20700	--
GLYMA_09G073600	6397	97.2467	43.1133	8626.33	3266	-1.27907	down	6.29543e-15	3.11955e-13	At3g43190	K00695 sucrose synthase [EC:2.4.1.13] | (RefSeq) sucrose synthase (A)
GLYMA_09G076200	2418	3.92	1.64	151	55.3333	-1.34875	down	3.41861e-05	0.000410953	At2g26440	K01051 pectinesterase [EC:3.1.1.11] | (RefSeq) probable pectinesterase/pectinesterase inhibitor 12 (A)
GLYMA_09G077400	4809	11.6633	6.03	449.667	195.667	-1.06682	down	1.67907e-07	3.28543e-06	At4g33140	--
GLYMA_09G082900	2046	2.50333	6.44333	104.333	222	1.24015	up	1.82647e-05	0.000233598	At1g07250	K08237 hydroquinone glucosyltransferase [EC:2.4.1.218] | (RefSeq) hydroquinone glucosyltransferase (A)
GLYMA_09G083600	577	2.76667	8.02667	31	78.6667	1.44476	up	0.00019382	0.00190219	--	--
GLYMA_09G091800	1577	1.39	0.58	44	15.3333	-1.38885	down	0.00770241	0.0413605	At1g80520	--
GLYMA_09G091900	4431	2.02	4.56333	93.3333	179.333	1.06957	up	3.39983e-05	0.000409219	At1g80530	--
GLYMA_09G092100	2995	13.1467	2.13667	796.667	109.333	-2.73254	down	2.607e-23	2.61004e-21	At5g25280	--
GLYMA_09G096700	2780	28.2067	12.0833	1537.33	570.333	-1.32277	down	1.26285e-10	3.84105e-09	At5g35160	K17086 transmembrane 9 superfamily member 2/4 | (RefSeq) transmembrane 9 superfamily member 11 (A)
GLYMA_09G097200	2042	8.01	3.57667	340	123.333	-1.29262	down	7.32506e-06	0.000102461	At4g02040	--
GLYMA_09G098400	20301	0.466667	0.153333	147.333	41	-1.70978	down	2.90676e-09	7.4049e-08	At4g08100	K22913 phosphatidylinositol 3,5-bisphosphate 5-phosphatase [EC:3.1.3.-] | (RefSeq) phosphoinositide phosphatase SAC2 isoform X2 (A)
GLYMA_09G099000	3639	11.92	5.44667	325.667	125	-1.23945	down	5.73806e-08	1.21708e-06	At1g78600	--
GLYMA_09G103600	3526	0.626667	0.183333	28.3333	7.33333	-1.84778	down	0.00259443	0.0173704	At3g58480	--
GLYMA_09G107100	1470	72.1267	22.09	1116.33	283.667	-1.8313	down	9.98688e-15	4.87144e-13	At5g05600	K24028 salicylic acid 3-hydroxylase [EC:1.14.11.-] | (RefSeq) protein DMR6-LIKE OXYGENASE 2 isoform X1 (A)
GLYMA_09G107700	645	6.90667	2.90667	83	28.3333	-1.38715	down	0.0017623	0.0126447	At3g52870	--
GLYMA_09G109700	2497	3.43667	1.78667	113	49	-1.06096	down	0.00123498	0.00937431	At5g06710	K09338 homeobox-leucine zipper protein | (RefSeq) homeobox-leucine zipper protein HOX11 (A)
GLYMA_09G110500	2562	17.2933	7.67667	906.333	332	-1.28453	down	1.28717e-05	0.000170464	At5g06740	K13416 brassinosteroid insensitive 1-associated receptor kinase 1 [EC:2.7.10.1 2.7.11.1] | (RefSeq) BRASSINOSTEROID INSENSITIVE 1-associated receptor kinase 1 (A)
GLYMA_09G111700	7733	19.3	7.46	652	211.667	-1.484	down	8.29141e-16	4.44192e-14	At3g58010	--
GLYMA_09G111800	1105	36.0233	18.4933	813.333	346	-1.08285	down	7.47513e-07	1.28156e-05	At3g58000	--
GLYMA_09G113000	4784	0.68	1.69667	23.3333	50	1.21774	up	0.00609907	0.0343742	At5g06800	K14491 two-component response regulator ARR-B family | (RefSeq) two-component response regulator ARR12 isoform X2 (A)
GLYMA_09G115100	11840	1.74667	4.29	151.333	311.333	1.1793	up	4.11048e-06	6.1132e-05	At3g18290	K16276 zinc finger protein-like protein | (RefSeq) zinc finger protein BRUTUS isoform X2 (A)
GLYMA_09G116400	2424	4.41333	1.99333	197.667	76.3333	-1.25257	down	6.00437e-07	1.04718e-05	At1g76880	--
GLYMA_09G117100	9433	40.22	10.5367	1131.67	242	-2.06278	down	3.56804e-13	1.46914e-11	At1g70790	K12486 stromal membrane-associated protein | (RefSeq) probable ADP-ribosylation factor GTPase-activating protein AGD11 (A)
GLYMA_09G119500	1688	5.10333	0.603333	78.3333	7.66667	-3.20025	down	2.11085e-11	7.03753e-10	At1g22990	K07213 copper chaperone | (RefSeq) copper chaperone homolog CCH (A)
GLYMA_09G119900	694	38.0833	12.7133	536.333	150	-1.70167	down	1.93786e-13	8.1752e-12	--	--
GLYMA_09G122600	4202	2.00667	6.71	67.3333	189.333	1.62387	up	0.000804388	0.00648877	At1g16310	--
GLYMA_09G123800	3458	32.9033	12.21	824.333	251.333	-1.54988	down	4.05732e-08	8.83503e-07	At1g70670	K17991 peroxygenase [EC:1.11.2.3] | (RefSeq) uncharacterized protein LOC100799842 (A)
GLYMA_09G123900	1022	8.65333	1.56333	177	27	-2.57724	down	2.30657e-16	1.3049e-14	--	--
GLYMA_09G125900	3289	0.2	0.706667	13	39	1.72802	up	0.000456871	0.00400331	--	--
GLYMA_09G129100	1520	3.48667	0.296667	85.6667	6	-3.67704	down	2.82361e-12	1.03926e-10	At5g52830	K13425 WRKY transcription factor 22 | (RefSeq) probable WRKY transcription factor 27 (A)
GLYMA_09G130500	1065	1.84	4.61333	26.6667	55.3333	1.20243	up	0.00173277	0.0124745	At1g01490	--
GLYMA_09G131100	1209	57.5767	159.003	1078.67	2421.33	1.34139	up	7.12269e-07	1.22542e-05	At1g01490	--
GLYMA_09G132200	2732	0.623333	2.38	14.6667	48	1.84127	up	7.68452e-05	0.000843897	At4g25700	K15746 beta-carotene 3-hydroxylase [EC:1.14.15.24] | (RefSeq) BCH5; beta-carotene hydroxylase 5 (A)
GLYMA_09G134700	5107	6.92	3.22333	394.333	157	-1.20781	down	1.95453e-08	4.47158e-07	At5g52430	--
GLYMA_09G140400	1372	2.84333	0.45	26.3333	3.33333	-2.80037	down	0.000274202	0.00257622	--	--
GLYMA_09G140800	1449	23.6933	3.47667	702.667	85.6667	-2.88603	down	8.08622e-29	1.13804e-26	At3g05200	K10664 E3 ubiquitin-protein ligase ATL6/9/15/31/42/55 [EC:2.3.2.27] | (RefSeq) E3 ubiquitin-protein ligase ATL31 (A)
GLYMA_09G143800	3542	24.3233	80.6033	805.667	2228	1.61442	up	3.17206e-18	2.10694e-16	At1g63120	--
GLYMA_09G145700	4038	69.0933	3.59	2189.33	94	-4.38936	down	8.29651e-51	4.5952e-48	At3g61060	--
GLYMA_09G146800	1719	0.913333	0.136667	31.3333	4	-2.84352	down	1.37325e-05	0.000179922	At4g23030	K03327 multidrug resistance protein, MATE family | (RefSeq) protein DETOXIFICATION 49 (A)
GLYMA_09G147200	5410	12.5067	41.9767	1400.33	3827.67	1.62342	up	7.60676e-11	2.38772e-09	At5g51990	K09286 EREBP-like factor | (RefSeq) ethylene-responsive transcription factor ERF023 (A)
GLYMA_09G148900	4576	1.49	0.5	88.3333	26	-1.66761	down	4.988e-05	0.000577504	At5g51830	K00847 fructokinase [EC:2.7.1.4] | (RefSeq) probable fructokinase-7 isoform X1 (A)
GLYMA_09G150000	5486	9.54	4.94	992.333	426.667	-1.0713	down	5.19556e-07	9.20617e-06	At4g25400	--
GLYMA_09G150400	1162	0.966667	0.0333333	21.6667	0.666667	-4.92772	down	4.04321e-05	0.000478937	At5g10530	--
GLYMA_09G153900	4319	22.0033	9.65	792	305.333	-1.28326	down	2.18051e-06	3.45063e-05	At2g36530	K01689 enolase [EC:4.2.1.11] | (RefSeq) enolase (A)
GLYMA_09G156200	1892	0.273333	1.35667	10.6667	43.6667	2.17903	up	6.57148e-06	9.30155e-05	At1g33340	K20044 phosphatidylinositol-binding clathrin assembly protein | (RefSeq) putative clathrin assembly protein At5g57200 (A)
GLYMA_09G160100	7435	4.12667	19.4767	278	1115.33	2.12866	up	5.44091e-24	5.66184e-22	At1g17830	--
GLYMA_09G163700	945	66.4133	26.41	1306.33	421.333	-1.46156	down	6.01422e-07	1.04837e-05	At1g17860	--
GLYMA_09G163900	1030	76.31	41.26	1631.67	719	-1.01271	down	5.96939e-05	0.000676755	At1g17860	--
GLYMA_09G165500	731	4.56333	2.08333	69.3333	25.6667	-1.26626	down	0.00225794	0.0155418	--	--
GLYMA_09G165700	3829	2.98	0.94	95	25	-1.78193	down	2.35463e-07	4.4921e-06	At5g54310	K12486 stromal membrane-associated protein | (RefSeq) probable ADP-ribosylation factor GTPase-activating protein AGD15 isoform X2 (A)
GLYMA_09G165900	2800	10.2833	1.83333	575.333	86.6667	-2.59919	down	1.73424e-31	3.06978e-29	At1g61260	--
GLYMA_09G166000	3531	2.27667	0.923333	156.667	54	-1.41325	down	4.7183e-07	8.41696e-06	At3g26618	K03265 peptide chain release factor subunit 1 | (RefSeq) eukaryotic peptide chain release factor subunit 1-3 (A)
GLYMA_09G169200	595	13.2467	5.99333	115.667	44.3333	-1.25891	down	8.84419e-05	0.000951769	At5g23320	K00587 protein-S-isoprenylcysteine O-methyltransferase [EC:2.1.1.100] | (RefSeq) protein-S-isoprenylcysteine O-methyltransferase A (A)
GLYMA_09G173300	1121	13.4467	6.29333	313.333	119.667	-1.21879	down	0.000188373	0.00185606	At1g67920	--
GLYMA_09G173800	2507	0.88	2.26667	34.3333	75	1.2623	up	0.000726827	0.00592153	At1g48480	K13418 somatic embryogenesis receptor kinase 1 [EC:2.7.10.1 2.7.11.1] | (RefSeq) SERK1; somatic embryogenesis receptor kinase precursor (A)
GLYMA_09G174200	6521	20.42	8.14333	789	269.333	-1.43423	down	7.03041e-11	2.21287e-09	At3g17860	K13464 jasmonate ZIM domain-containing protein | (RefSeq) protein TIFY 6B isoform X1 (A)
GLYMA_09G181600	10767	16.4267	37.0133	849.333	1601.67	1.06015	up	3.37302e-08	7.4345e-07	At1g18390	K13430 serine/threonine-protein kinase PBS1 [EC:2.7.11.1] | (RefSeq) serine/threonine-protein kinase (A)
GLYMA_09G181700	654	1.24667	5.84333	16	64.6667	2.13563	up	3.70443e-06	5.55745e-05	At1g66880	--
GLYMA_09G182200	7085	1.06667	8.63	39.3333	266	2.90087	up	0.00456236	0.0272425	At1g66920	K13416 brassinosteroid insensitive 1-associated receptor kinase 1 [EC:2.7.10.1 2.7.11.1] | (RefSeq) BRASSINOSTEROID INSENSITIVE 1-associated receptor kinase 1 isoform X1 (A)
GLYMA_09G184100	2874	3.06667	0.636667	107.667	18.6667	-2.38135	down	9.02546e-11	2.80738e-09	At3g18400	--
GLYMA_09G184200	4609	4.52667	2.34	234.667	101.667	-1.06639	down	3.2023e-06	4.88308e-05	At1g73850	--
GLYMA_09G185200	1333	33.3367	18.0333	906.333	405.333	-1.0071	down	2.66571e-05	0.000329046	At1g13350	--
GLYMA_09G185900	4803	11.7333	25.63	516.333	940.333	1.01352	up	8.13782e-06	0.000112592	At1g49050	K22683 aspartyl protease family protein [EC:3.4.23.-] | (RefSeq) aspartyl protease family protein 2 (A)
GLYMA_09G186900	2233	2.84	6.25667	88.3333	165	1.02871	up	1.43798e-05	0.000188043	At1g20050	K01824 cholestenol Delta-isomerase [EC:5.3.3.5] | (RefSeq) probable 3-beta-hydroxysteroid-Delta(8),Delta(7)-isomerase (A)
GLYMA_09G189300	7653	28.8133	12.1833	1176.67	414	-1.35818	down	8.38855e-10	2.3119e-08	At3g48000	K12355 coniferyl-aldehyde dehydrogenase [EC:1.2.1.68] | (RefSeq) ALDH2C8; aldehyde dehydrogenase family 2 member C8 (A)
GLYMA_09G190600	1895	1.28667	4.57	33.3333	98.6667	1.7054	up	8.84741e-05	0.000951817	At3g24520	K09419 heat shock transcription factor, other eukaryote | (RefSeq) HSF-16; heat stress transcription factor 16 (A)
GLYMA_09G191000	3545	0.483333	1.51	16.3333	44.3333	1.55906	up	0.000254329	0.00241128	At5g19540	--
GLYMA_09G191800	3284	0.25	1.02667	7.66667	26.6667	1.93669	up	0.00265833	0.0177007	At3g49290	--
GLYMA_09G196700	1187	13.3067	5.59	330.333	112	-1.38278	down	9.66242e-06	0.000131409	At1g76410	K19040 E3 ubiquitin-protein ligase ATL10/75/76/77/78 [EC:2.3.2.27] | (RefSeq) RING-H2 finger protein ATL78 (A)
GLYMA_09G197200	5055	0.216667	1.68333	12.6667	83.3333	2.84728	up	2.1057e-09	5.46973e-08	At1g42540	K05387 glutamate receptor, ionotropic, plant | (RefSeq) glutamate receptor 3.6 (A)
GLYMA_09G197400	5307	0.1	0.67	7.33333	41.6667	2.63433	up	4.7987e-06	7.04219e-05	At1g42540	K05387 glutamate receptor, ionotropic, plant | (RefSeq) glutamate receptor 3.6 (A)
GLYMA_09G197900	2664	4.82667	2.51667	260.667	113.667	-1.05872	down	3.97893e-06	5.94072e-05	At4g35510	--
GLYMA_09G203000	1906	14.9167	5.36667	449	135	-1.58888	down	4.73526e-13	1.90632e-11	At5g65640	K13422 transcription factor MYC2 | (RefSeq) transcription factor MYC1 (A)
GLYMA_09G203100	2646	15.8867	5.22667	580.333	159.333	-1.71951	down	4.51531e-17	2.70603e-15	At3g53440	--
GLYMA_09G203200	1036	41.6	16.8033	797.667	268.667	-1.42594	down	1.06751e-11	3.67686e-10	At5g65660	--
GLYMA_09G203400	2440	14.2267	6.24	458.667	170.667	-1.29544	down	9.87388e-08	2.01947e-06	At4g37890	--
GLYMA_09G203500	8433	222.857	119.807	12114.7	5430.33	-1.0105	down	1.01576e-08	2.40559e-07	At4g37870	K01610 phosphoenolpyruvate carboxykinase (ATP) [EC:4.1.1.49] | (RefSeq) phosphoenolpyruvate carboxykinase (ATP) 1 (A)
GLYMA_09G203600	639	11.3567	5.21333	151.667	56	-1.25575	down	0.000601299	0.0050535	--	--
GLYMA_09G204200	3357	4.54667	2.06333	308.667	117.667	-1.25781	down	1.23322e-07	2.47364e-06	--	--
GLYMA_09G204500	2748	18.9	99.1567	1034.33	4604	2.28638	up	2.69909e-21	2.29423e-19	At1g32640	K13422 transcription factor MYC2 | (RefSeq) transcription factor MYC1 (A)
GLYMA_09G206100	2402	9.57	5.12	467.667	209	-1.01985	down	7.53414e-06	0.000105172	At5g16760	K00913 inositol-1,3,4-trisphosphate 5/6-kinase / inositol-tetrakisphosphate 1-kinase [EC:2.7.1.159 2.7.1.134] | (RefSeq) inositol-tetrakisphosphate 1-kinase 1 (A)
GLYMA_09G206200	2517	6	13.5	193	366.667	1.06114	up	2.77863e-06	4.30199e-05	At3g02940	K09422 transcription factor MYB, plant | (RefSeq) transcription factor MYB41 (A)
GLYMA_09G208000	6040	1.53	3.87	68.3333	148	1.23404	up	2.89052e-06	4.46314e-05	At1g32190_1	K01076 abhydrolase domain-containing protein 17 [EC:3.1.2.22] | (RefSeq) alpha/beta hydrolase domain-containing protein 17B (A)
GLYMA_09G208200	5116	3.79333	11.4533	347	883	1.4851	up	4.19905e-14	1.89981e-12	At3g03050	K20924 cellulose synthase-like protein [EC:2.4.1.-] | (RefSeq) cellulose synthase-like protein D3 (A)
GLYMA_09G209200	3845	15.1833	6.38667	689	240	-1.36973	down	5.08983e-10	1.43619e-08	At1g32160	--
GLYMA_09G209400	3484	22.3767	7.43333	895.333	248	-1.7054	down	2.58992e-08	5.82053e-07	At4g16070	K13806 sn1-specific diacylglycerol lipase [EC:3.1.1.116] | (RefSeq) diacylglycerol lipase-beta (A)
GLYMA_09G209500	3584	4.75333	1.65	223.667	66.3333	-1.63037	down	1.05481e-07	2.14841e-06	At4g16070	K13806 sn1-specific diacylglycerol lipase [EC:3.1.1.116] | (RefSeq) uncharacterized protein LOC100810158 (A)
GLYMA_09G210400	4355	1.68333	0.776667	124	47.6667	-1.22624	down	0.00065783	0.00544334	At3g07040	K13457 disease resistance protein RPM1 | (RefSeq) disease resistance protein RPM1 (A)
GLYMA_09G213900	7422	5.99667	3.07	511.667	220.667	-1.07798	down	5.028e-07	8.92768e-06	At2g43040	K21843 tetratricopeptide repeat protein 7 | (RefSeq) protein NPG1 (A)
GLYMA_09G216800	7495	22.9867	11.48	2614.67	1105.67	-1.11007	down	1.28009e-08	2.99852e-07	At5g45280	K19882 O-palmitoleoyl-L-serine hydrolase [EC:3.1.1.98] | (RefSeq) pectin acetylesterase 8 (A)
GLYMA_09G217200	3095	9.26	2.56333	559	130.667	-1.96617	down	1.04463e-06	1.74903e-05	At3g47090	K13420 LRR receptor-like serine/threonine-protein kinase FLS2 [EC:2.7.11.1] | (RefSeq) probable LRR receptor-like serine/threonine-protein kinase At3g47570 (A)
GLYMA_09G217600	186	156.213	53.0633	591.667	166	-1.67766	down	1.84857e-10	5.47239e-09	--	--
GLYMA_09G218100	8526	0.356667	1.07	21.3333	53.6667	1.47185	up	0.00313221	0.020199	At4g19380	K17756 long-chain-alcohol oxidase [EC:1.1.3.20] | (RefSeq) long-chain-alcohol oxidase FAO4A (A)
GLYMA_09G222300	698	3.28667	0.676667	47	8	-2.40767	down	4.97955e-06	7.2765e-05	At1g75590	K14488 SAUR family protein | (RefSeq) auxin-induced protein 10A5-like (A)
GLYMA_09G225400	3068	0.5	2.45333	23	95	2.18948	up	8.69897e-08	1.79737e-06	At3g63440	K00279 cytokinin dehydrogenase [EC:1.5.99.12] | (RefSeq) cytokinin dehydrogenase 6 (A)
GLYMA_09G230300	5088	3.45333	7.75	307.667	604	1.07191	up	0.000278299	0.00260829	At5g61480	K00924 kinase [EC:2.7.1.-] | (RefSeq) NARK; nodule autoregulation receptor kinase precursor (A)
GLYMA_09G231400	6129	16.2567	5.08	1629.33	426	-1.79064	down	6.08321e-23	5.91777e-21	At5g51460	K01087 trehalose 6-phosphate phosphatase [EC:3.1.3.12] | (RefSeq) trehalose-phosphate phosphatase A (A)
GLYMA_09G233800	1723	5.03333	13.0367	60.3333	133	1.26783	up	8.20539e-05	0.000893667	At1g77200	K09286 EREBP-like factor | (RefSeq) dehydration-responsive element-binding protein 3 (A)
GLYMA_09G235200	6120	8.48333	2.28667	544	124.333	-1.99811	down	3.00031e-13	1.24886e-11	At1g69480	K24195 xenotropic and polytropic retrovirus receptor 1 | (RefSeq) PHO1-H14; phosphate transporter PHO1 homolog 1 (A)
GLYMA_09G235400	4995	184.43	83.8467	7536.33	2881.33	-1.24988	down	4.74982e-16	2.59728e-14	At3g01120	K01739 cystathionine gamma-synthase [EC:2.5.1.48] | (RefSeq) CGS2; cystathionine-gamma-synthase (A)
GLYMA_09G237000	3949	16.2533	2.77333	713	106	-2.64661	down	9.63594e-23	9.19161e-21	At5g39660	--
GLYMA_09G238200	4945	4.37667	27.3667	115.667	615.333	2.53153	up	4.74608e-13	1.90843e-11	At4g18910	K09874 aquaporin NIP | (RefSeq) NIP2-1; putative Si transporter NIP2-1 (A)
GLYMA_09G238900	4282	9.91667	1.38333	583	68.3333	-2.95164	down	2.5076e-35	5.74074e-33	At5g39780	--
GLYMA_09G239100	2418	0.133333	1.01333	2.66667	17.3333	2.81076	up	0.00175508	0.012614	At5g39860	--
GLYMA_09G240100	5751	3.38667	0.953333	127.667	31	-1.92568	down	1.53052e-07	3.01884e-06	At5g39890	K23953 plant cysteine oxidase [EC:1.13.11.-] | (RefSeq) plant cysteine oxidase 2 isoform X1 (A)
GLYMA_09G242600	1106	6.82	27.2933	154.333	512.667	1.87475	up	2.25567e-14	1.05531e-12	At2g44840	K09286 EREBP-like factor | (RefSeq) ethylene-responsive transcription factor 1 (A)
GLYMA_09G245100	156	27.3	13.9933	87.3333	37	-1.09027	down	0.0013554	0.0101293	--	--
GLYMA_09G246200	4895	0.746667	2.53	54.6667	159.667	1.6687	up	1.4577e-06	2.38029e-05	At3g25500	--
GLYMA_09G246800	3483	0.163333	1.89333	3	26	3.28343	up	1.187e-05	0.000158667	At4g37850	K13422 transcription factor MYC2 | (RefSeq) transcription factor MYC2 (A)
GLYMA_09G247000	1410	0.326667	1.79667	6.33333	28.6667	2.31631	up	8.30586e-05	0.000901375	At4g37850	--
GLYMA_09G249000	1916	6.70333	3.07	154.667	58.3333	-1.25547	down	0.000572296	0.00484175	At3g07470	--
GLYMA_09G250600	1859	88.3933	44.9667	3421	1414.33	-1.10494	down	4.05516e-05	0.000480021	At3g02790	--
GLYMA_09G251500	6565	9.91	3.39	518	146.333	-1.66628	down	3.00396e-12	1.09624e-10	At1g11170	--
GLYMA_09G252300	7269	19.8333	10.4267	1138.33	507.333	-1.03636	down	3.62597e-10	1.04197e-08	At5g16520	--
GLYMA_09G253100	6222	0.886667	2.01	78.6667	157.667	1.09644	up	0.000986558	0.00774895	At5g44800	--
GLYMA_09G253800	1524	35.1767	13.0433	750.333	225.667	-1.56253	down	6.16002e-08	1.30175e-06	At1g19640	K21483 salicylate 1-O-methyltransferase [EC:2.1.1.274] | (RefSeq) S-adenosyl-L-methionine:benzoic acid/salicylic acid carboxyl methyltransferase 3 (A)
GLYMA_09G253900	5065	14.13	7.43	1394	594.333	-1.05788	down	0.000799563	0.00645439	At1g19640	K21483 salicylate 1-O-methyltransferase [EC:2.1.1.274] | (RefSeq) S-adenosyl-L-methionine:benzoic acid/salicylic acid carboxyl methyltransferase 3 (A)
GLYMA_09G254400	1881	7.45333	3.38667	163.667	61.3333	-1.25009	down	0.000852845	0.00681635	At5g41570	K13424 WRKY transcription factor 33 | (RefSeq) WRKY62; WRKY transcription factor 62 (A)
GLYMA_09G254800	2226	118.1	16.8533	3967.33	473.333	-2.91957	down	1.36516e-39	4.18566e-37	At4g01250	K13425 WRKY transcription factor 22 | (RefSeq) WRKY transcription factor 22 (A)
GLYMA_09G256100	4034	2.90333	9.02	110.333	290.333	1.5233	up	3.40331e-10	9.80449e-09	At3g61490	K01184 polygalacturonase [EC:3.2.1.15] | (RefSeq) LOW QUALITY PROTEIN: probable polygalacturonase At3g15720 (A)
GLYMA_09G257100	3776	6.83	2.4	332.333	95.6667	-1.63582	down	1.13994e-09	3.07507e-08	At5g41350	K19043 E3 ubiquitin-protein ligase RHF [EC:2.3.2.27] | (RefSeq) E3 ubiquitin-protein ligase RHF1A (A)
GLYMA_09G258600	3146	18.1367	7.64	911.333	316.333	-1.36846	down	6.29499e-10	1.75605e-08	At2g45980	--
GLYMA_09G262800	2374	8.27333	1.39667	240	34.3333	-2.67583	down	9.30332e-21	7.6613e-19	At3g61220	K15095 (+)-neomenthol dehydrogenase [EC:1.1.1.208] | (RefSeq) short-chain dehydrogenase/reductase domain-containing protein (A)
GLYMA_09G263500	890	1.00333	3.37667	17.6667	51	1.64899	up	4.86895e-05	0.000566012	At5g62150	--
GLYMA_09G264800	4662	17.3133	8.07333	834.333	324	-1.22004	down	1.71894e-09	4.51632e-08	--	--
GLYMA_09G269000	3328	22.7167	7.84667	575.333	166.333	-1.64811	down	2.4523e-14	1.14263e-12	At1g62880	K20368 protein cornichon | (RefSeq) protein cornichon homolog 4 (A)
GLYMA_09G270000	4084	0.713333	1.84	46.6667	105.667	1.28624	up	0.000236459	0.00226453	At3g54220	K14494 DELLA protein | (RefSeq) DELLA protein 1 (A)
GLYMA_09G274000	2030	22.0767	77.0467	519.333	1557.33	1.70622	up	1.31645e-11	4.49372e-10	At3g56400	K13425 WRKY transcription factor 22 | (RefSeq) WRKY transcription factor 22 (A)
GLYMA_09G275100	5169	3.58333	13.7667	275	903.333	1.83674	up	8.12049e-13	3.19059e-11	At3g08760	K13430 serine/threonine-protein kinase PBS1 [EC:2.7.11.1] | (RefSeq) serine/threonine-protein kinase (A)
GLYMA_09G276500	2260	17.39	2.41	501.667	59.3333	-2.95663	down	1.26708e-39	3.91996e-37	Hs7106299	K19323 ataxin-10 | (RefSeq) ataxin-10 (A)
GLYMA_09G277900	3117	1.59	5.91667	41	124.333	1.75485	up	8.26895e-05	0.000898594	At5g05340	K00430 peroxidase [EC:1.11.1.7] | (RefSeq) cationic peroxidase 1 (A)
GLYMA_09G280200	4105	0.706667	5.74	55.6667	377	2.90428	up	1.04526e-16	6.06322e-15	At2g38470	K13424 WRKY transcription factor 33 | (RefSeq) probable WRKY transcription factor 33 (A)
GLYMA_09G281900	2499	19.2133	57.81	600.333	1482	1.46036	up	6.22861e-08	1.31382e-06	At5g54160	K21553 isoliquiritigenin 2'-O-methyltransferase [EC:2.1.1.154] | (RefSeq) isoliquiritigenin 2'-O-methyltransferase (A)
GLYMA_09G282600	1599	5.40667	13.3067	123	249.667	1.17625	up	7.9304e-05	0.000866189	At5g08240	--
GLYMA_09G285200	3687	2.22	0.463333	80.3333	14	-2.3726	down	1.57162e-07	3.09457e-06	At2g01900	K01099 inositol polyphosphate 5-phosphatase INPP5B/F [EC:3.1.3.36] | (RefSeq) type IV inositol polyphosphate 5-phosphatase 9 isoform X2 (A)
GLYMA_10G002100	2047	4.42333	1.47333	170.333	47	-1.70539	down	9.7527e-06	0.000132479	At3g22970	--
GLYMA_10G004800	11357	9.9	35.5567	566	1694.67	1.72738	up	3.25457e-11	1.06036e-09	At3g23430	K24195 xenotropic and polytropic retrovirus receptor 1 | (RefSeq) PHO1-H4; phosphate transporter PHO1 (A)
GLYMA_10G006600	2333	6.96667	1.96	189.667	44	-1.95144	down	6.00801e-11	1.90152e-09	At2g31180	K09422 transcription factor MYB, plant | (RefSeq) transcription factor MYB4 (A)
GLYMA_10G008500	1286	18.3733	7.5	480.667	163.667	-1.40885	down	1.32944e-10	4.02939e-09	At3g04580	K14509 ethylene receptor [EC:2.7.13.-] | (RefSeq) ethylene receptor 2 (A)
GLYMA_10G010000	2688	6.30333	0.646667	242.333	21	-3.40364	down	4.96507e-24	5.23008e-22	At1g02460	K01213 galacturan 1,4-alpha-galacturonidase [EC:3.2.1.67] | (RefSeq) polygalacturonase At1g48100 (A)
GLYMA_10G010400	1651	6.03333	28.3833	173.667	675.667	2.11708	up	8.30159e-18	5.33851e-16	At5g49620	K09422 transcription factor MYB, plant | (RefSeq) transcription factor MYB78 (A)
GLYMA_10G012400	1296	34.5367	12.96	911	284.333	-1.53473	down	1.79177e-13	7.5962e-12	At2g47360	--
GLYMA_10G013700	6976	13.3133	1.91667	1822	215.667	-2.91581	down	5.21456e-35	1.17808e-32	At3g62550	--
GLYMA_10G014800	7197	1.57	3.63333	155.333	310.667	1.11407	up	2.04655e-05	0.000259043	At2g25920	--
GLYMA_10G016500	1755	91.6333	39.0733	3015.67	1107	-1.3346	down	9.30477e-11	2.88381e-09	At3g16770	K09286 EREBP-like factor | (RefSeq) uncharacterized protein LOC100780763 (A)
GLYMA_10G017500	1196	21.9167	8.73667	540.333	176.333	-1.45214	down	1.02801e-07	2.09881e-06	At1g02810_2	--
GLYMA_10G017600	1409	223.127	81.5433	3456.67	1045	-1.57287	down	7.58353e-14	3.35159e-12	At4g02380	--
GLYMA_10G018700	3347	106.427	56.6467	2209.67	952.333	-1.03982	down	0.00012854	0.00132276	At2g47710	--
GLYMA_10G018800	3760	15.8867	5.55	516.667	150.333	-1.63006	down	2.27932e-08	5.18013e-07	At1g02860	K16275 E3 ubiquitin-protein ligase BAH [EC:2.3.2.27] | (RefSeq) E3 ubiquitin-protein ligase BAH1 isoform X1 (A)
GLYMA_10G019400	15554	44.7533	18.93	3944	1436.33	-1.34159	down	1.42291e-11	4.83311e-10	At1g02890_2	K22530 ATPase family AAA domain-containing protein 1 [EC:3.6.1.-] | (RefSeq) outer mitochondrial transmembrane helix translocase (A)
GLYMA_10G019800	697	3.16333	1.16333	46.3333	13.6667	-1.58001	down	0.00306649	0.0198498	--	--
GLYMA_10G019900	1341	0.966667	2.47667	20.6667	45.6667	1.2483	up	0.00935234	0.0481571	At3g62760	K00799 glutathione S-transferase [EC:2.5.1.18] | (RefSeq) GSTF7; glutathione S-transferase GST 21 (A)
GLYMA_10G022300	959	5.00333	39.5533	101	644.667	2.84027	up	1.69201e-19	1.29407e-17	--	--
GLYMA_10G023400	3237	1.13	3.21667	66	159.333	1.39937	up	4.63007e-07	8.2897e-06	At2g48010	K13416 brassinosteroid insensitive 1-associated receptor kinase 1 [EC:2.7.10.1 2.7.11.1] | (RefSeq) BRASSINOSTEROID INSENSITIVE 1-associated receptor kinase 1 (A)
GLYMA_10G023500	4643	3.76	8.52	163	311.667	1.06776	up	1.11774e-06	1.86417e-05	At2g48030	--
GLYMA_10G027900	1867	2.91333	0.706667	102.667	21	-2.15579	down	3.88951e-09	9.73511e-08	At3g22550	--
GLYMA_10G028000	3903	11.0667	3.49333	860	229.667	-1.77485	down	3.36288e-15	1.7083e-13	At3g63220	--
GLYMA_10G033700	3435	0.6	1.70667	40.3333	99.3333	1.40985	up	0.000198108	0.00193819	--	--
GLYMA_10G040700	2924	25.55	8.38667	1454.33	414	-1.70474	down	8.33398e-13	3.267e-11	At2g20370	K20888 xyloglucan galactosyltransferase MUR3 [EC:2.4.1.-] | (RefSeq) xyloglucan galactosyltransferase MUR3 (A)
GLYMA_10G041400	6675	13.9367	7.07333	570	242.333	-1.09725	down	4.84666e-07	8.63249e-06	At5g43910	K00852 ribokinase [EC:2.7.1.15] | (RefSeq) ribokinase (A)
GLYMA_10G044700	3980	31.0567	15.22	1319.33	537.333	-1.15015	down	7.41983e-07	1.27276e-05	At3g53620	K01507 inorganic pyrophosphatase [EC:3.6.1.1] | (RefSeq) pyrophosphorylase PPa4-like (A)
GLYMA_10G044800	5350	0.33	1.10667	13	36.3333	1.62439	up	0.00169576	0.0122363	At2g37460	--
GLYMA_10G045100	6789	8.13333	2.49333	674	171	-1.82485	down	3.96239e-07	7.20702e-06	At2g37440	K01099 inositol polyphosphate 5-phosphatase INPP5B/F [EC:3.1.3.36] | (RefSeq) type IV inositol polyphosphate 5-phosphatase 9 isoform X2 (A)
GLYMA_10G045400	825	63.3433	184.423	1089.33	2565	1.41597	up	1.92267e-07	3.72809e-06	At2g37430	--
GLYMA_10G046000	2372	13.2867	29.0033	634.333	1164.33	1.01788	up	0.00013344	0.00136745	At3g09520	K07195 exocyst complex component 7 | (RefSeq) exocyst complex component EXO70H1 (A)
GLYMA_10G047200	1455	8.41667	2.36	244	58	-1.94662	down	6.62806e-12	2.31074e-10	At5g02750	K11982 E3 ubiquitin-protein ligase RNF115/126 [EC:2.3.2.27] | (RefSeq) E3 ubiquitin-protein ligase RDUF1 (A)
GLYMA_10G051100	1931	17.19	8.37	684	272.333	-1.16061	down	1.64851e-05	0.000212499	At5g03240	K08770 ubiquitin C | (RefSeq) polyubiquitin 3 (A)
GLYMA_10G051700	1793	0.813333	0.18	32	5.33333	-2.34582	down	0.00371276	0.0231349	--	--
GLYMA_10G053000	872	15.3933	38.9767	280.667	577.333	1.20793	up	5.38297e-05	0.000617818	--	--
GLYMA_10G053200	1278	9.11667	2.29	238	50	-2.10995	down	8.31428e-10	2.29327e-08	At2g28400	--
GLYMA_10G056400	330	1.40667	11.8367	9.66667	65.6667	2.92088	up	4.70552e-08	1.01245e-06	At3g09870	K14488 SAUR family protein | (RefSeq) auxin-responsive protein SAUR32 (A)
GLYMA_10G058900	7450	1.46333	4.11	68.3333	165	1.38918	up	3.2085e-06	4.89036e-05	At3g09880	K11584 serine/threonine-protein phosphatase 2A regulatory subunit B' | (RefSeq) serine/threonine protein phosphatase 2A 57 kDa regulatory subunit B' beta isoform (A)
GLYMA_10G059700	897	10.95	5.77667	196.333	87.6667	-1.03441	down	2.65376e-05	0.000327689	At2g28200	--
GLYMA_10G062600	1930	1.70667	0.55	69	18	-1.76759	down	0.000187795	0.0018526	At3g53150	K13496 UDP-glucosyltransferase 73C [EC:2.4.1.-] | (RefSeq) UDP-glycosyltransferase 73C1 (A)
GLYMA_10G063000	3668	28.79	3.94667	1199.33	136.667	-2.9814	down	1.23499e-30	2.09948e-28	At2g36690	K24028 salicylic acid 3-hydroxylase [EC:1.14.11.-] | (RefSeq) protein DMR6-LIKE OXYGENASE 2 isoform X1 (A)
GLYMA_10G064900	1418	15.2133	1.53667	418.667	36	-3.41506	down	2.59095e-37	6.74039e-35	At3g10040	--
GLYMA_10G066100	3193	21.5	47.8533	606	1119.33	1.03501	up	6.12219e-08	1.29535e-06	At5g03720	K09419 heat shock transcription factor, other eukaryote | (RefSeq) HSF-20; LOW QUALITY PROTEIN: heat stress transcription factor A-3 (A)
GLYMA_10G067000	558	4.02	43.67	47	413.333	3.29527	up	1.21105e-27	1.55177e-25	At4g25490	K09286 EREBP-like factor | (RefSeq) ethylene-responsive transcription factor ERF023 (A)
GLYMA_10G070900	1408	93.42	50.3867	2702.33	1201.67	-1.01574	down	7.28035e-06	0.000101919	At2g36320	--
GLYMA_10G073400	2298	0.916667	2.6	22.6667	53.6667	1.38602	up	0.000548374	0.0046739	At3g52720	K01674 carbonic anhydrase [EC:4.2.1.1] | (RefSeq) alpha carbonic anhydrase 1-like precursor (A)
GLYMA_10G073600	1717	43.7433	19.4567	1544.33	564.667	-1.28663	down	3.46545e-07	6.37782e-06	At2g36220	--
GLYMA_10G079400	735	3.11333	6.95	44	86.3333	1.07704	up	0.00237513	0.0161926	At2g35980	--
GLYMA_10G081100	1476	4.13333	1.01333	122.667	25.3333	-2.14189	down	1.88972e-11	6.32486e-10	--	--
GLYMA_10G081900	1302	112.117	23.83	3000	526.333	-2.35055	down	2.09662e-17	1.30195e-15	At2g35930	--
GLYMA_10G082600	7287	0.0833333	0.286667	10.3333	31	1.69736	up	0.00140435	0.0104271	At3g52380	K11294 nucleolin | (RefSeq) 33 kDa ribonucleoprotein, chloroplastic (A)
GLYMA_10G083100	1036	5.75	1.67	120.333	29.3333	-1.90024	down	6.88416e-09	1.66951e-07	At2g35910	K10664 E3 ubiquitin-protein ligase ATL6/9/15/31/42/55 [EC:2.3.2.27] | (RefSeq) E3 ubiquitin-protein ligase ATL6 (A)
GLYMA_10G086800	11375	0.296667	0.993333	49.6667	141	1.63714	up	0.00171194	0.0123348	At3g52310	K05681 ATP-binding cassette, subfamily G (WHITE), member 2 | (RefSeq) ABC transporter G family member 22 isoform X1 (A)
GLYMA_10G090700	8933	29.36	12.4	1223.67	440	-1.35559	down	1.57411e-09	4.15807e-08	At5g13700	K13366 polyamine oxidase [EC:1.5.3.14 1.5.3.16 1.5.3.-] | (RefSeq) polyamine oxidase 1 (A)
GLYMA_10G091800	4004	0.453333	0.986667	35.3333	66.6667	1.03323	up	0.00251022	0.0169287	At3g57880	K12486 stromal membrane-associated protein | (RefSeq) ADP-ribosylation factor GTPase-activating protein AGD12 (A)
GLYMA_10G093100	4544	0.73	2.40333	38.3333	105.333	1.59869	up	1.85861e-06	2.98385e-05	At2g42280	K12126 phytochrome-interacting factor 3 | (RefSeq) transcription factor PIF3 (A)
GLYMA_10G100700	850	2.96667	0.323333	51.6667	4.66667	-3.31113	down	1.13488e-08	2.67663e-07	--	--
GLYMA_10G107800	2051	0.406667	1.44667	16.6667	50.3333	1.7164	up	0.00727748	0.0395292	--	--
GLYMA_10G118900	1854	27.71	10.48	1038.67	328.667	-1.5184	down	2.35861e-17	1.45674e-15	At5g61600	K09286 EREBP-like factor | (RefSeq) ethylene-responsive transcription factor ERF105 (A)
GLYMA_10G128900	3115	0.256667	1.73667	16.3333	92.6667	2.63059	up	7.414e-06	0.000103537	At2g34930	K20718 LRR receptor-like serine/threonine-protein kinase ERECTA [EC:2.7.11.1] | (RefSeq) LRR receptor-like serine/threonine-protein kinase ERECTA precursor (A)
GLYMA_10G129100	201	14.33	4.67333	60.3333	16	-1.75581	down	0.000870913	0.00694546	--	--
GLYMA_10G136500	7802	0.22	0.0766667	31.6667	10	-1.59711	down	0.00956995	0.0490715	At2g33390	--
GLYMA_10G138300	5063	0.95	0.273333	44.3333	11	-1.89378	down	0.000141028	0.00143569	At4g04450	K13424 WRKY transcription factor 33 | (RefSeq) WRKY19; WRKY transcription factor 19 (A)
GLYMA_10G141100	913	11.7367	5.73333	218.667	89	-1.15635	down	2.22506e-05	0.000279475	--	--
GLYMA_10G147100	2073	28.1067	67.8567	839	1659.33	1.14912	up	1.12553e-06	1.87534e-05	--	--
GLYMA_10G147700	1285	160.663	57.1467	2959.67	867.667	-1.61497	down	7.26719e-14	3.22423e-12	At3g62550	--
GLYMA_10G147800	2720	14.1533	6.62667	291	115.333	-1.20713	down	1.92591e-07	3.73227e-06	At4g02080	K07953 GTP-binding protein SAR1 [EC:3.6.5.-] | (RefSeq) GTP-binding protein SAR1A (A)
GLYMA_10G148700	3342	4.21	13.32	176.667	483.667	1.57137	up	1.72548e-08	3.96871e-07	At5g57580	--
GLYMA_10G151100	400	6.76667	1.40667	54.3333	9.66667	-2.37086	down	3.2297e-06	4.91832e-05	--	--
GLYMA_10G151300	865	173.54	81.3833	2678.67	1035.67	-1.2159	down	1.56332e-08	3.61603e-07	At5g27760	--
GLYMA_10G152300	4768	0.983333	2.22	67	134.667	1.08997	up	0.00254152	0.0170761	At3g05470	--
GLYMA_10G156600	1944	1.34	0.64	47.6667	18.6667	-1.1977	down	0.00613546	0.0345396	At1g22490	K20558 transcription factor SPEECHLESS | (RefSeq) SPCH3; transcription factor SPEECHLESS (A)
GLYMA_10G159100	4374	3.59333	7.74	204	375	1.00206	up	1.73958e-07	3.39416e-06	At5g27950	K10406 kinesin family member C2/C3 | (RefSeq) kinesin-like protein KIN-14S (A)
GLYMA_10G160400	3799	4.27333	16.31	251	821.667	1.83288	up	1.2199e-18	8.42886e-17	At3g04910	K08867 WNK lysine deficient protein kinase [EC:2.7.11.1] | (RefSeq) probable serine/threonine-protein kinase WNK9 isoform X1 (A)
GLYMA_10G165600	5641	0.49	1.14	31	63.3333	1.13718	up	0.00324187	0.0207349	At5g28910	--
GLYMA_10G168900	1247	129.737	372.94	2570.67	6054.33	1.401	up	4.50425e-05	0.000528264	At3g05950	--
GLYMA_10G170900	1821	2.26667	6.41333	39.3333	88.6667	1.36128	up	0.00744654	0.0402274	At3g02800	K18045 tyrosine-protein phosphatase SIW14 [EC:3.1.3.48] | (RefSeq) tyrosine-protein phosphatase DSP3 (A)
GLYMA_10G171300	7185	68.11	35.62	3216.67	1403	-1.05095	down	4.17032e-09	1.03925e-07	At1g05840	K22683 aspartyl protease family protein [EC:3.4.23.-] | (RefSeq) LOW QUALITY PROTEIN: aspartyl protease family protein 2 (A)
GLYMA_10G173100	1922	1.61	3.75	32.3333	63.6667	1.10462	up	0.00230757	0.0158326	At1g64640	--
GLYMA_10G177300	3256	0.586667	1.42667	30	61.6667	1.16795	up	0.000864364	0.00690125	At5g51560	K13416 brassinosteroid insensitive 1-associated receptor kinase 1 [EC:2.7.10.1 2.7.11.1] | (RefSeq) BRASSINOSTEROID INSENSITIVE 1-associated receptor kinase 1 (A)
GLYMA_10G177900	1061	17.37	8.26667	373.333	148.333	-1.18708	down	8.92571e-08	1.83869e-06	At4g34980	--
GLYMA_10G178400	2548	82.54	37.05	2629.33	969.667	-1.27354	down	1.65934e-07	3.25053e-06	At1g66410	K13448 calcium-binding protein CML | (RefSeq) SCAM-4; calmodulin (A)
GLYMA_10G179100	2198	3.34667	1.63	136	55.3333	-1.15315	down	6.10498e-05	0.000690303	At3g22970	K14213 Xaa-Pro dipeptidase [EC:3.4.13.9] | (RefSeq) probable Xaa-Pro aminopeptidase pepP (A)
GLYMA_10G179600	2137	9.8	5.20667	421.333	188	-1.02746	down	4.62455e-06	6.81868e-05	At4g14580	K12761 carbon catabolite-derepressing protein kinase [EC:2.7.11.1] | (RefSeq) CBL-interacting serine/threonine-protein kinase 4 (A)
GLYMA_10G180000	1111	124.16	35.9967	2483.67	589	-1.91259	down	1.83805e-15	9.52016e-14	At1g04240	K14484 auxin-responsive protein IAA | (RefSeq) uncharacterized protein LOC100527777 (A)
GLYMA_10G180500	1958	1.08	0.39	40.6667	13	-1.55549	down	0.0028341	0.0186407	At1g03220	K22683 aspartyl protease family protein [EC:3.4.23.-] | (RefSeq) protein ASPARTIC PROTEASE IN GUARD CELL 1 (A)
GLYMA_10G180800	2373	4.23	9.82	116.333	228.667	1.10451	up	3.09211e-06	4.73187e-05	At3g23250	K09422 transcription factor MYB, plant | (RefSeq) MYB29; MYB29 protein (A)
GLYMA_10G185200	5073	22.34	86.54	1072.33	3477.67	1.84155	up	2.21503e-13	9.28743e-12	At1g04280	--
GLYMA_10G186800	1085	11.7067	5.32	263.667	98	-1.26703	down	2.59269e-05	0.000320609	At3g23240	K14516 ethylene-responsive transcription factor 1 | (RefSeq) ethylene-responsive transcription factor 1B (A)
GLYMA_10G187300	7111	9.68333	4.54667	946	366.333	-1.21523	down	4.07063e-07	7.38824e-06	At5g43430	K03521 electron transfer flavoprotein beta subunit | (RefSeq) electron transfer flavoprotein subunit beta, mitochondrial (A)
GLYMA_10G188200	1048	4.49667	0.923333	95.6667	16.3333	-2.40387	down	1.03078e-10	3.17748e-09	At3g23170	--
GLYMA_10G188500	4491	39.43	8.26333	3468.33	629.333	-2.35594	down	1.4314e-29	2.22417e-27	At3g23150	K14509 ethylene receptor [EC:2.7.13.-] | (RefSeq) ethylene receptor 2 (A)
GLYMA_10G189200	4675	0.493333	1.36333	36.3333	85.3333	1.36397	up	0.0011748	0.00898498	At2g33420	--
GLYMA_10G194200	2441	100.587	38.3233	5056	1574	-1.51752	down	3.04382e-07	5.68069e-06	At5g07580	K09286 EREBP-like factor | (RefSeq) ethylene-responsive transcription factor 5-like (A)
GLYMA_10G195700	3782	52.61	1.72333	3760.33	106	-5.02868	down	8.70182e-76	1.4941e-72	At1g73080	K20718 LRR receptor-like serine/threonine-protein kinase ERECTA [EC:2.7.11.1] | (RefSeq) LRR receptor-like serine/threonine-protein kinase ERECTA (A)
GLYMA_10G197800	4228	0.14	0.436667	10.6667	29.6667	1.57923	up	0.00523813	0.0303795	At1g20510	K10526 OPC-8:0 CoA ligase 1 [EC:6.2.1.-] | (RefSeq) 4-coumarate--CoA ligase-like 5 (A)
GLYMA_10G198400	558	2.92333	12.6567	31.3333	119.667	2.03008	up	1.28457e-06	2.11976e-05	--	--
GLYMA_10G199500	1190	36.1	18.4067	877.667	371	-1.09384	down	3.17664e-07	5.90611e-06	--	--
GLYMA_10G200700	5138	12.9367	59.5067	746.333	2915.67	2.09789	up	2.20928e-28	2.96354e-26	At5g04500	--
GLYMA_10G200800	4415	2.34333	5.33333	125.667	245	1.08612	up	3.71585e-06	5.57216e-05	At2g45580	K22983 cytochrome P450 family 76 subfamily A | (RefSeq) cytochrome P450 76A2 (A)
GLYMA_10G201100	8250	22.48	6.25333	873.667	209.667	-1.94433	down	2.13355e-19	1.61024e-17	At3g52990	K00873 pyruvate kinase [EC:2.7.1.40] | (RefSeq) pyruvate kinase 1, cytosolic (A)
GLYMA_10G204100	3461	2.99333	8.70333	123.667	299.333	1.42188	up	1.45486e-09	3.86088e-08	At1g25530	K24917 amino acid permease | (RefSeq) amino acid permease 6 (A)
GLYMA_10G204400	1851	62.59	33.87	2369.67	1058.67	-1.003	down	2.03828e-06	3.23898e-05	At1g25560	K09287 RAV-like factor | (RefSeq) RAV; RAV-like DNA-binding protein (A)
GLYMA_10G205600	4984	1.56333	3.66667	81.6667	166.667	1.13448	up	0.00187303	0.0132818	At3g25620	K05681 ATP-binding cassette, subfamily G (WHITE), member 2 | (RefSeq) ABC transporter G family member 21 (A)
GLYMA_10G208200	5436	19.73	9.92667	1383	578.667	-1.10591	down	1.14575e-06	1.90625e-05	At3g54850	K08332 vacuolar protein 8 | (RefSeq) U-box domain-containing protein 15-like (A)
GLYMA_10G209100	7196	7.5	2.33667	495.333	130.667	-1.78968	down	5.56701e-18	3.62754e-16	At5g04250	K13717 OTU domain-containing protein 3 [EC:3.4.19.12] | (RefSeq) OVARIAN TUMOR DOMAIN-containing deubiquitinating enzyme 7 isoform X1 (A)
GLYMA_10G210600	3553	62.14	24.27	3131.67	1036.67	-1.46716	down	8.27326e-16	4.43912e-14	At4g30080	K14486 auxin response factor | (RefSeq) auxin response factor 19 (A)
GLYMA_10G211300	5602	10.7667	4.30667	989.667	335	-1.42951	down	5.69415e-16	3.09884e-14	At2g39220	--
GLYMA_10G212300	5105	2.98	6.69667	110	210	1.06743	up	0.000263734	0.00248672	At1g11310	K08472 mlo protein | (RefSeq) MLO-like protein 6 (A)
GLYMA_10G213000	1341	3.24333	0.456667	67.3333	8	-2.93692	down	9.2965e-08	1.91048e-06	At4g30230	--
GLYMA_10G213500	1773	9.71667	31.2567	188.667	513.667	1.58003	up	1.35137e-13	5.81529e-12	At1g07900	K13944 LOB domain-containing protein 16 | (RefSeq) LBD14; LBD domain-containing transcription factor (A)
GLYMA_10G214600	954	3.10333	6.84333	61.3333	110	1.00727	up	0.00469875	0.0279113	--	--
GLYMA_10G215700	2029	8.12	0.546667	215.333	12.3333	-3.99629	down	1.10293e-28	1.53338e-26	At5g54160	K21553 isoliquiritigenin 2'-O-methyltransferase [EC:2.1.1.154] | (RefSeq) isoliquiritigenin 2'-O-methyltransferase (A)
GLYMA_10G218200	3900	4.45667	2.4	95	42.3333	-1.0109	down	0.00352154	0.0221769	At1g34270	K23200 putative arabinosyltransferase [EC:2.4.2.-] | (RefSeq) probable arabinosyltransferase ARAD1 (A)
GLYMA_10G219300	2937	0.1	0.386667	5.66667	19.3333	1.87516	up	0.00581521	0.0330455	At4g09670	--
GLYMA_10G220200	1426	0.736667	0.07	22.3333	1.66667	-3.55414	down	0.000239476	0.00228752	At3g23880	--
GLYMA_10G221800	2437	10.4833	5.31333	238	101.667	-1.0937	down	2.43365e-06	3.80837e-05	At4g09830	--
GLYMA_10G222300	862	1.82	0.413333	32.6667	6	-2.26716	down	0.000329897	0.00302329	At4g09890	--
GLYMA_10G223500	7256	1.78333	3.84	152	280	1.00669	up	0.000686667	0.00563714	At4g39350	K10999 cellulose synthase A [EC:2.4.1.12] | (RefSeq) cellulose synthase A catalytic subunit 2 [UDP-forming] isoform X1 (A)
GLYMA_10G224500	2114	35.1333	122.747	1491	4368.33	1.69538	up	3.54792e-15	1.79698e-13	At1g18740	--
GLYMA_10G224900	4114	45.9833	21.19	2662.33	1030	-1.22956	down	8.52572e-12	2.95134e-10	At1g25280	K19600 tubby and related proteins | (RefSeq) tubby-like F-box protein 8 (A)
GLYMA_10G225300	5443	15.0367	6.36	1661.67	585	-1.35869	down	1.35359e-11	4.61593e-10	At1g21200	--
GLYMA_10G229300	3761	0.123333	1.04667	8	57	2.97105	up	8.31629e-06	0.000114922	At5g24030	--
GLYMA_10G230200	1937	1.03	3.31	37	96.6667	1.55652	up	0.00327716	0.0209139	At5g52830	K13425 WRKY transcription factor 22 | (RefSeq) probable WRKY transcription factor 27 (A)
GLYMA_10G230600	1407	52.3533	119.15	979.667	1832.33	1.06886	up	7.03709e-06	9.88358e-05	At1g01490	--
GLYMA_10G231200	2418	2.60667	7.80667	70	174.667	1.46213	up	8.59162e-06	0.000118109	At4g25700	K15746 beta-carotene 3-hydroxylase [EC:1.14.15.24] | (RefSeq) BCH3; beta-carotene hydroxylase BCH3 (A)
GLYMA_10G232600	7747	7.13	16.3633	901.667	1705	1.07583	up	4.64735e-07	8.30765e-06	At1g02260	--
GLYMA_10G234100	5634	9.29	4.81333	778.333	346.667	-1.04979	down	2.37508e-07	4.52359e-06	At4g24020	--
GLYMA_10G234700	2064	1.11333	10.3533	34.6667	273	3.10499	up	5.21857e-21	4.34965e-19	At5g52400	K20661 cytochrome P450 family 714 subfamily A1 | (RefSeq) LOW QUALITY PROTEIN: cytochrome P450 714A1-like (A)
GLYMA_10G236500	3320	1.44333	0.746667	81.3333	35.6667	-1.06077	down	0.00275125	0.0182185	At5g52270	K08517 vesicle transport protein SEC22 | (RefSeq) 25.3 kDa vesicle transport protein (A)
GLYMA_10G237800	1422	1.96	5.46667	52.6667	124.333	1.37412	up	2.71784e-06	4.21738e-05	At5g62020	K09419 heat shock transcription factor, other eukaryote | (RefSeq) HSF-19; heat stress transcription factor 19 (A)
GLYMA_10G238700	3735	15.6167	4.36	465.667	108.333	-1.95702	down	1.01266e-15	5.37368e-14	At3g61060	--
GLYMA_10G239300	1464	19.5233	3.67667	584.333	90.6667	-2.53066	down	2.5022e-20	1.99363e-18	At1g63040	K09286 EREBP-like factor | (RefSeq) AP2-2; AP2 domain-containing transcription factor 2 (A)
GLYMA_10G239400	2613	1.44667	8.26333	75.3333	363.333	2.40545	up	1.55322e-17	9.73312e-16	At5g51990	K09286 EREBP-like factor | (RefSeq) ethylene-responsive transcription factor ERF023 (A)
GLYMA_10G239900	2566	1.16	2.55667	58.6667	110	1.04122	up	0.00310455	0.0200356	At5g51920	K15631 molybdenum cofactor sulfurtransferase [EC:2.8.1.9] | (RefSeq) molybdenum cofactor sulfurase isoform X3 (A)
GLYMA_10G241200	2014	7.76667	3.94333	261.667	109.333	-1.09949	down	0.000173922	0.00172791	At1g52540	K13430 serine/threonine-protein kinase PBS1 [EC:2.7.11.1] | (RefSeq) probable serine/threonine-protein kinase PBL7 (A)
GLYMA_10G241300	1529	6.96	3.74	170.333	75.3333	-1.02232	down	0.000369676	0.00332844	At5g51780	--
GLYMA_10G241400	3685	7.1	2.74	493	158.333	-1.49168	down	1.12557e-10	3.45109e-09	At4g25400	--
GLYMA_10G245000	3717	1.39333	3.33333	86.6667	177.667	1.15837	up	3.07904e-06	4.71607e-05	At1g34545	K21989 calcium permeable stress-gated cation channel | (RefSeq) CSC1-like protein At1g69450 (A)
GLYMA_10G247000	3593	1.19333	3.27333	63.6667	149	1.35132	up	5.39939e-06	7.81682e-05	At3g22550	--
GLYMA_10G247200	1336	2.22333	1.11333	59.3333	25.3333	-1.10542	down	0.00439647	0.0264822	At3g22540	--
GLYMA_10G247400	1148	6.25	3.21	147	62.3333	-1.0883	down	0.000668333	0.00551563	At3g22530	--
GLYMA_10G249900	1531	0.43	2.17667	10.6667	47.3333	2.25261	up	3.03237e-06	4.64873e-05	At3g05980	--
GLYMA_10G253100	3339	1.74667	3.96	85.3333	157.667	1.05844	up	0.00169816	0.0122484	At4g38830	K13416 brassinosteroid insensitive 1-associated receptor kinase 1 [EC:2.7.10.1 2.7.11.1] | (RefSeq) BRASSINOSTEROID INSENSITIVE 1-associated receptor kinase 1 (A)
GLYMA_10G256800	1947	0.133333	0.576667	5.33333	19	1.96887	up	0.00264592	0.0176531	At2g14690	--
GLYMA_10G259500	2952	18.4267	8.59667	818	323.667	-1.20783	down	1.55865e-11	5.26292e-10	At3g19540	--
GLYMA_10G260900	6455	6.51667	2.80667	381.333	144.667	-1.3058	down	2.46985e-06	3.85347e-05	At4g34260	K15923 alpha-L-fucosidase 2 [EC:3.2.1.51] | (RefSeq) alpha-L-fucosidase 2 (A)
GLYMA_10G262700	2995	2.01333	4.99667	119	252.333	1.20966	up	4.62304e-07	8.28344e-06	At2g23260	K13692 UDP-glucose:(indol-3-yl)acetate beta-D-glucosyltransferase [EC:2.4.1.121] | (RefSeq) UDP-glycosyltransferase 84B2 (A)
GLYMA_10G263200	1670	6.95667	2.97	229.667	84.3333	-1.3316	down	9.77035e-08	2.00187e-06	At2g15320	--
GLYMA_10G266500	3258	0.33	1.22333	21.3333	67.6667	1.79463	up	0.000109605	0.00114541	At3g50120	--
GLYMA_10G269000	159	1.87	8.94	6.33333	24	2.08585	up	0.00300014	0.0194972	--	--
GLYMA_10G270000	5458	17.0867	8.50333	1078.67	448	-1.12257	down	9.22743e-10	2.53091e-08	At1g15080	K18693 diacylglycerol diphosphate phosphatase / phosphatidate phosphatase [EC:3.1.3.81 3.1.3.4] | (RefSeq) uncharacterized protein LOC100805924 (A)
GLYMA_10G271200	10543	8.76	25.4	727.667	1811.67	1.43674	up	1.55457e-10	4.6583e-09	At1g25390	K20718 LRR receptor-like serine/threonine-protein kinase ERECTA [EC:2.7.11.1] | (RefSeq) LRR receptor-like serine/threonine-protein kinase ERECTA (A)
GLYMA_10G271900	3329	1.71667	4.11333	86.3333	183	1.1768	up	0.000216032	0.00209209	At1g68400	K13415 protein brassinosteroid insensitive 1 [EC:2.7.10.1 2.7.11.1] | (RefSeq) BRI1A; brassinosteroid receptor precursor (A)
GLYMA_10G272000	3162	1.56333	38.2367	66.3333	1366.33	4.50682	up	1.85435e-67	2.35846e-64	At1g68390	--
GLYMA_10G272300	1372	1.30667	2.84	35.3333	66.3333	1.0227	up	0.00533265	0.0307977	At1g68360	--
GLYMA_10G273200	1096	1.61667	7.13667	36.3333	132.333	2.01242	up	4.70158e-10	1.33321e-08	At1g25400	--
GLYMA_10G274000	1937	94.6367	38.5767	3389.67	1125.67	-1.4199	down	9.80387e-09	2.32825e-07	At1g68490	--
GLYMA_10G274100	981	29.6333	1.17667	594.333	19.3333	-4.77951	down	4.02587e-33	8.18037e-31	At1g68500	--
GLYMA_10G277800	1769	219.503	87.25	6199.67	2025.33	-1.45036	down	1.22175e-09	3.27517e-08	At5g04760	--
GLYMA_10G278600	1947	35.0633	9.15333	628.333	135.667	-2.06191	down	5.92109e-16	3.2071e-14	--	--
GLYMA_10G278700	383	10.2733	2.47333	54.3333	11.3333	-2.15034	down	8.37943e-06	0.000115701	--	--
GLYMA_10G280000	6513	1.67667	3.93	137.333	284.333	1.14122	up	0.00704971	0.0386104	At2g02070	--
GLYMA_10G281700	1092	1.05333	8.34	6	44.6667	2.96478	up	3.51521e-06	5.30603e-05	--	--
GLYMA_10G283300	3436	15.7167	8.12333	581	249.333	-1.07281	down	2.7004e-07	5.08397e-06	At5g23590	K09537 DnaJ homolog subfamily C member 17 | (RefSeq) dnaJ homolog subfamily C member 17 (A)
GLYMA_10G283800	7106	0.96	2.31667	50	101.667	1.15881	up	6.96943e-05	0.000776291	At2g16980	--
GLYMA_10G285200	4181	0.9	2.06333	34.3333	67	1.0904	up	0.00113722	0.00874037	At3g59040	--
GLYMA_10G285400	993	1.24333	0.326667	21.6667	5	-2.0044	down	0.00416648	0.0253863	--	--
GLYMA_10G286300	13920	7.73	3.38	758.333	282	-1.2983	down	3.41166e-11	1.10629e-09	At3g19960	K10357 myosin V | (RefSeq) myosin-2 (A)
GLYMA_10G286700	1394	25.4533	13.72	725.333	324.333	-1.01202	down	2.87476e-06	4.44081e-05	At5g64920	K11982 E3 ubiquitin-protein ligase RNF115/126 [EC:2.3.2.27] | (RefSeq) E3 ubiquitin-protein ligase RING1-like (A)
GLYMA_10G286800	1372	13.43	6.58333	294.333	120.667	-1.14881	down	4.1793e-05	0.000493356	At5g08350	--
GLYMA_10G286900	2173	12.6467	1.55667	445	46	-3.13706	down	4.43238e-36	1.07189e-33	At5g08350	--
GLYMA_10G287000	150	7.79	1.68667	24.3333	4.33333	-2.35105	down	0.00624941	0.0350719	--	--
GLYMA_10G287100	968	4.36667	1.17333	36	8.33333	-2.00011	down	0.00032349	0.00297102	At5g08350	--
GLYMA_10G288100	2151	1.04	2.84667	44.6667	104	1.34682	up	6.58075e-06	9.30354e-05	At3g20015	K22683 aspartyl protease family protein [EC:3.4.23.-] | (RefSeq) protein ASPARTIC PROTEASE IN GUARD CELL 1 (A)
GLYMA_10G289100	2102	2.74	0.186667	23.3333	1.33333	-3.9831	down	3.34158e-05	0.000403764	At4g38140	K16281 RING-H2 zinc finger protein RHA1 | (RefSeq) brassinosteroid-responsive RING protein 1 (A)
GLYMA_10G289300	3914	2.43667	1.18	187.667	78	-1.15029	down	1.83205e-05	0.000234224	--	--
GLYMA_10G290200	937	1.51	0.253333	30	4	-2.74039	down	0.000320851	0.00294994	At2g37430	--
GLYMA_10G290500	1930	0.0566667	0.68	1.66667	18	3.52222	up	0.000489869	0.00424693	At2g39490	--
GLYMA_10G291400	5225	163.213	77.09	7749.67	2992	-1.20613	down	3.96131e-07	7.20702e-06	At2g39420	K18368 caffeoylshikimate esterase [EC:3.1.1.-] | (RefSeq) caffeoylshikimate esterase isoform X3 (A)
GLYMA_10G297900	900	5.29	1.15333	67.3333	12.3333	-2.31121	down	8.77236e-08	1.81144e-06	At1g16220	K14497 protein phosphatase 2C [EC:3.1.3.16] | (RefSeq) protein phosphatase 2C 37 (A)
GLYMA_11G003500	3022	5.68667	12.3533	213.667	385.667	1.00752	up	0.000174931	0.00173617	At5g54810	K01696 tryptophan synthase beta chain [EC:4.2.1.20] | (RefSeq) TSB; tryptophan synthase beta subunit (A)
GLYMA_11G004500	7555	1.4	0.75	173.667	78.6667	-1.0084	down	4.64728e-05	0.000542999	At5g45190	K15188 cyclin T | (RefSeq) cyclin-T1-3 isoform X2 (A)
GLYMA_11G008000	2202	72.4467	32.68	2662.67	999	-1.26536	down	2.58138e-09	6.61034e-08	At3g22600	--
GLYMA_11G008400	1567	88.15	34.2633	2787.67	906.667	-1.47812	down	3.988e-17	2.39839e-15	At1g64980	--
GLYMA_11G009800	2999	7.68333	3.70333	266.667	109	-1.16169	down	6.6664e-06	9.41687e-05	At3g02990	K09419 heat shock transcription factor, other eukaryote | (RefSeq) HSF-24; heat stress transcription factor A-1b (A)
GLYMA_11G014200	1535	3.25667	1.50667	104	39	-1.24855	down	0.00181717	0.0129706	At1g71450	K09286 EREBP-like factor | (RefSeq) AP2 domain transcription factor TINY (A)
GLYMA_11G014500	6133	6.05667	2.32667	195	63.3333	-1.49234	down	1.12372e-07	2.27526e-06	At4g10030	--
GLYMA_11G014700	2564	2.33	1.20333	68	29	-1.07115	down	0.00810255	0.0429518	At4g32480	--
GLYMA_11G014800	1227	7.82667	0.83	202	17.3333	-3.37126	down	9.46561e-16	5.03952e-14	At1g71520	K09286 EREBP-like factor | (RefSeq) ethylene-responsive transcription factor ERF010 (A)
GLYMA_11G015400	2074	15.3667	7.09333	234	89.6667	-1.23505	down	1.5477e-06	2.51529e-05	At5g08280	K01749 hydroxymethylbilane synthase [EC:2.5.1.61] | (RefSeq) LOW QUALITY PROTEIN: porphobilinogen deaminase, chloroplastic (A)
GLYMA_11G016100	2471	0.95	0.246667	47.3333	10.3333	-2.05759	down	0.000140018	0.00142592	At1g50420	K14494 DELLA protein | (RefSeq) DELLA protein 2 (A)
GLYMA_11G016600	1296	8.4	18.7433	220.667	409.667	1.03288	up	0.00214619	0.0149084	At2g46500_2	--
GLYMA_11G017100	4450	43.0567	16.8433	1787.33	584.667	-1.4668	down	3.96105e-10	1.13352e-08	At4g10960	K01784 UDP-glucose 4-epimerase [EC:5.1.3.2] | (RefSeq) UDP-glucose 4-epimerase GEPI48 isoform X2 (A)
GLYMA_11G017700	3021	31.8533	16.7833	964.333	424.667	-1.03788	down	1.57671e-08	3.64363e-07	--	--
GLYMA_11G018100	1451	1.18	0.0933333	34	2.33333	-3.73929	down	3.46265e-07	6.37782e-06	At1g64380	K09286 EREBP-like factor | (RefSeq) ethylene-responsive transcription factor RAP2-4 (A)
GLYMA_11G019000	1780	0.37	2.11333	13	63.6667	2.41743	up	3.1695e-09	8.0266e-08	At4g23750	K13434 pathogenesis-related genes transcriptional activator PTI6 | (RefSeq) pathogenesis-related genes transcriptional activator PTI6 (A)
GLYMA_11G019400	4360	8.32333	35.1067	326	1165.67	1.97195	up	1.34257e-21	1.18824e-19	At3g61600	--
GLYMA_11G021200	1176	1.03667	0.146667	21.6667	2.66667	-2.91719	down	0.00244616	0.016601	At4g01250	K13426 WRKY transcription factor 29 | (RefSeq) probable WRKY transcription factor 29 (A)
GLYMA_11G021500	2935	0.523333	1.43667	20.3333	47	1.33618	up	0.00349186	0.0220302	At4g11280	K20772 1-aminocyclopropane-1-carboxylate synthase 1/2/6 [EC:4.4.1.14] | (RefSeq) 1-aminocyclopropane-1-carboxylate synthase (A)
GLYMA_11G021600	2453	2.12667	1.07667	66.6667	27.6667	-1.10713	down	0.00652884	0.0363608	At1g63910	K09422 transcription factor MYB, plant | (RefSeq) uncharacterized protein LOC100797787 (A)
GLYMA_11G022400	1294	3	1.55333	77	34	-1.05726	down	0.00114441	0.00878385	At3g61460	K16281 RING-H2 zinc finger protein RHA1 | (RefSeq) brassinosteroid-responsive RING protein 1 (A)
GLYMA_11G022800	2511	0.91	4.60667	32.6667	138	2.22199	up	1.80854e-05	0.000231649	At5g52430	--
GLYMA_11G027400	2253	8.32667	20.9533	229	483.333	1.21911	up	4.8565e-10	1.37487e-08	At4g22920	K22013 magnesium dechelatase [EC:4.99.1.10] | (RefSeq) SGR1; senescence-inducible chloroplast stay-green protein 1 (A)
GLYMA_11G029000	3163	14.2633	5.24333	755.333	233.667	-1.55491	down	2.85452e-15	1.46087e-13	At1g12420	--
GLYMA_11G030000	3664	0.463333	1.11	24.6667	50.3333	1.15836	up	0.00197854	0.0138971	At4g22730	K13416 brassinosteroid insensitive 1-associated receptor kinase 1 [EC:2.7.10.1 2.7.11.1] | (RefSeq) BRASSINOSTEROID INSENSITIVE 1-associated receptor kinase 1 isoform X1 (A)
GLYMA_11G033100	867	0.486667	2.01	8.33333	29.3333	1.93611	up	0.00471873	0.0280057	At3g60580	--
GLYMA_11G036300	3679	1.36667	3.33667	58	117	1.1646	up	0.000462188	0.00403856	At5g47240	--
GLYMA_11G037900	5782	2.42	6.49333	117	264	1.30991	up	6.93236e-10	1.92603e-08	At4g17570	--
GLYMA_11G038500	8209	10.5333	4.08667	723.667	238.333	-1.47316	down	1.84302e-11	6.18665e-10	At5g41150	K10848 DNA excision repair protein ERCC-4 [EC:3.1.-.-] | (RefSeq) DNA repair endonuclease UVH1 isoform X1 (A)
GLYMA_11G038600	1558	122.247	439.307	2944.33	8832.33	1.72779	up	3.64353e-14	1.6616e-12	At1g19180	K13464 jasmonate ZIM domain-containing protein | (RefSeq) uncharacterized protein LOC100306332 (A)
GLYMA_11G039400	3553	41.6833	19.2633	1722.33	662	-1.22847	down	6.12652e-07	1.06524e-05	At4g17090	K01177 beta-amylase [EC:3.2.1.2] | (RefSeq) beta-amylase 3, chloroplastic (A)
GLYMA_11G039700	2474	7.09	3.74	295	135.667	-1.02028	down	0.000840915	0.00674224	At4g17680	K19042 E3 ubiquitin-protein ligase BOI and related proteins [EC:2.3.2.27] | (RefSeq) probable BOI-related E3 ubiquitin-protein ligase 2 (A)
GLYMA_11G040600	1207	0.613333	1.81333	15	36.6667	1.44146	up	0.00947269	0.0486506	At2g45760	--
GLYMA_11G041600	6383	48.4433	11.9467	4640.67	963.667	-2.12999	down	6.13847e-37	1.56144e-34	At4g18010	K24221 type I inositol polyphosphate 5-phosphatase IP5P1/2 [EC:3.1.3.56] | (RefSeq) type I inositol polyphosphate 5-phosphatase 2 (A)
GLYMA_11G042100	2984	10.0767	4.64	610	234.667	-1.23858	down	4.30028e-08	9.32859e-07	--	--
GLYMA_11G042300	5494	0.293333	0.933333	16.6667	46	1.59046	up	0.000167926	0.00167584	At2g35350	K01102 pyruvate dehydrogenase phosphatase [EC:3.1.3.43] | (RefSeq) probable protein phosphatase 2C 4 (A)
GLYMA_11G042700	1980	16	8.62333	253	111.667	-1.02142	down	0.00138621	0.0103169	At4g17960	--
GLYMA_11G042900	4267	5.79	2.77	229	93.6667	-1.17104	down	1.25595e-06	2.07552e-05	At5g46640	--
GLYMA_11G043000	3507	27.1367	3.71333	1957.67	219.667	-2.99103	down	4.51896e-36	1.08518e-33	At2g35290	--
GLYMA_11G043100	753	62.12	18.3733	945	235	-1.87513	down	7.4386e-19	5.23445e-17	At2g35270	--
GLYMA_11G043700	2469	20.96	138.627	891	4866	2.60976	up	2.02118e-21	1.7616e-19	At4g37850	K13422 transcription factor MYC2 | (RefSeq) transcription factor MYC1 (A)
GLYMA_11G045100	1861	5.88333	2.69	183.667	69	-1.25033	down	0.000393255	0.00351768	At4g37790	K09338 homeobox-leucine zipper protein | (RefSeq) transcription factor ABIG1-like protein (A)
GLYMA_11G046000	814	2.96667	0.936667	43.6667	11.3333	-1.78873	down	0.000351539	0.00318687	At4g37720	--
GLYMA_11G046500	3123	1.79667	5.18	108.667	274.333	1.43709	up	6.48642e-08	1.36401e-06	At5g65920	--
GLYMA_11G051200	1710	1.62	0.15	56.6667	4.33333	-3.53537	down	2.31193e-08	5.23001e-07	At5g43120	--
GLYMA_11G051900	1139	1.55333	0.256667	24.3333	3.33333	-2.72389	down	0.000339495	0.00309412	At4g37300	--
GLYMA_11G052900	1530	0.776667	2.20333	22	50.6667	1.37471	up	0.00427309	0.0258934	At3g50120	--
GLYMA_11G053100	1795	3.83667	19.1433	101.667	433.667	2.21497	up	5.80476e-24	6.02222e-22	At2g23320	K13425 WRKY transcription factor 22 | (RefSeq) WRKY10; WRKY transcription factor 10 (A)
GLYMA_11G055100	1317	3.54667	19.3633	94.6667	430.333	2.33475	up	4.03204e-13	1.64053e-11	At3g50310	K20716 mitogen-activated protein kinase kinase kinase 17/18 | (RefSeq) mitogen-activated protein kinase kinase kinase 18 (A)
GLYMA_11G056200	2424	8.88333	26.6967	308.667	758	1.462	up	6.78863e-09	1.6475e-07	At4g36990	K09419 heat shock transcription factor, other eukaryote | (RefSeq) HSF-25; heat stress transcription factor 25 (A)
GLYMA_11G058100	1819	40.01	89.2867	1021	1884	1.03743	up	9.31738e-05	0.000995207	At1g49570	K00430 peroxidase [EC:1.11.1.7] | (RefSeq) peroxidase 10 (A)
GLYMA_11G058900	5024	6.77667	22.45	426.667	1176	1.61429	up	8.62372e-14	3.79665e-12	At5g66900	K13457 disease resistance protein RPM1 | (RefSeq) disease resistance protein RPM1 (A)
GLYMA_11G060300	6953	6.14667	2.57667	480.667	181.333	-1.33192	down	0.000948857	0.0074802	At2g23460	K23136 fraxetin 5-hydroxylase [EC:1.14.14.164] | (RefSeq) xanthotoxin 5-hydroxylase CYP82C4 (A)
GLYMA_11G060500	770	131.547	3.43667	2030	45	-5.37706	down	2.27775e-67	2.7935e-64	--	--
GLYMA_11G062000	5093	1.28	3.50667	70.3333	165.667	1.35681	up	2.03641e-07	3.92647e-06	At5g66600	--
GLYMA_11G062300	8203	2.21667	9.15333	146.333	518.667	1.94984	up	2.63126e-10	7.6639e-09	At4g36870	--
GLYMA_11G063200	1905	0.306667	1.59667	11.6667	51.3333	2.27789	up	7.71087e-07	1.31934e-05	At2g23770	K13429 chitin elicitor receptor kinase 1 | (RefSeq) chitin elicitor receptor kinase 1 (A)
GLYMA_11G064400	2078	0.403333	1.85333	16.6667	65	2.09156	up	4.0726e-08	8.86267e-07	At5g66690	K12356 coniferyl-alcohol glucosyltransferase [EC:2.4.1.111] | (RefSeq) UDP-glycosyltransferase 72E1 (A)
GLYMA_11G064800	2316	15.01	6.96	313.667	120	-1.23049	down	0.000151145	0.00152611	At4g36740	K09338 homeobox-leucine zipper protein | (RefSeq) homeobox-leucine zipper protein ATHB-40 (A)
GLYMA_11G067600	6058	3.45667	1.54667	121.667	45.6667	-1.28522	down	0.00036101	0.00326325	At1g20460	--
GLYMA_11G068100	1148	0.903333	3.2	22.3333	62	1.67615	up	0.00151302	0.0111043	--	--
GLYMA_11G071000	6615	0.336667	0.786667	31.3333	64.6667	1.13715	up	0.00488584	0.0287984	At1g75310	--
GLYMA_11G075200	4641	0.823333	2.02333	72.6667	159	1.22029	up	0.000672411	0.0055413	At1g75640	K13415 protein brassinosteroid insensitive 1 [EC:2.7.10.1 2.7.11.1] | (RefSeq) BRI1B; brassinosteroid receptor precursor (A)
GLYMA_11G077400	1136	249.74	99.8033	5878.67	1912	-1.4459	down	1.14669e-08	2.70263e-07	At4g36040	K03686 molecular chaperone DnaJ | (RefSeq) chaperone protein DnaJ (A)
GLYMA_11G077700	2054	244.54	32.16	7455.67	842	-3.02888	down	5.94342e-33	1.19355e-30	At4g36010	K12173 BRCA1-A complex subunit BRE | (RefSeq) BRISC and BRCA1-A complex member 2 (A)
GLYMA_11G077800	2193	14.8567	2.30333	483.667	63.6667	-2.79981	down	1.45413e-28	1.99739e-26	At4g38660	K12173 BRCA1-A complex subunit BRE | (RefSeq) BRISC and BRCA1-A complex member 2 (A)
GLYMA_11G077900	1848	7.42333	0.76	149.667	13	-3.3986	down	7.86982e-21	6.51204e-19	At2g17850	K22547 arsenate reductase [EC:1.20.4.1] | (RefSeq) protein HIGH ARSENIC CONTENT 1-like (A)
GLYMA_11G078000	5250	1.62667	0.27	63	9.33333	-2.6668	down	1.20657e-07	2.42586e-06	At5g53760	K08472 mlo protein | (RefSeq) MLO-like protein 4 (A)
GLYMA_11G078600	3104	1.27333	0.506667	50.6667	17	-1.44071	down	0.0016781	0.0121292	At2g24960	--
GLYMA_11G082000	2926	15.1867	7.81667	470	204.667	-1.07096	down	9.86766e-08	2.0194e-06	At5g66050	K08999 uncharacterized protein | (RefSeq) bifunctional nuclease 2 (A)
GLYMA_11G082500	1918	43.9833	12.67	995.333	240.667	-1.90948	down	5.31867e-12	1.87904e-10	At4g35750	K24997 ganglioside-induced differentiation-associated protein 2 | (RefSeq) protein GDAP2 homolog isoform X2 (A)
GLYMA_11G082700	4496	48.7267	156.26	2139.67	5691	1.56506	up	5.82692e-12	2.04598e-10	At1g47670	K24917 amino acid permease | (RefSeq) amino acid permease 8 (A)
GLYMA_11G083800	10175	3.65667	1.85333	133	56.3333	-1.10039	down	0.000207232	0.00201882	At1g20560	K23618 acyl-activating enzyme 11/12 [EC:6.2.1.2 6.2.1.-] | (RefSeq) trans-cinnamate:CoA ligase, peroxisomal (A)
GLYMA_11G087300	7959	7.56333	1.55667	852.333	150.333	-2.38594	down	8.07088e-33	1.59284e-30	At5g65980	K24139 auxin efflux carrier family protein | (RefSeq) protein PIN-LIKES 7 (A)
GLYMA_11G088300	984	12.17	5.23	248.333	87.3333	-1.34585	down	5.40872e-06	7.82374e-05	--	--
GLYMA_11G091300	1600	0.856667	2.59333	26.3333	66	1.46962	up	3.96244e-05	0.000470343	At4g35070	K19042 E3 ubiquitin-protein ligase BOI and related proteins [EC:2.3.2.27] | (RefSeq) probable BOI-related E3 ubiquitin-protein ligase 3 (A)
GLYMA_11G091400	938	75.2333	18.2533	1353	266.333	-2.17382	down	3.7746e-12	1.35585e-10	At4g38580	K07213 copper chaperone | (RefSeq) uncharacterized protein LOC100305622 (A)
GLYMA_11G096500	2450	2.28	5.08	111.667	210.667	1.0496	up	1.92912e-05	0.000245356	At5g41920	K14494 DELLA protein | (RefSeq) GAI2; DELLA protein 1 (A)
GLYMA_11G096600	2598	1.37	11.24	48.6667	337.333	2.93065	up	5.68628e-29	8.06888e-27	At2g17040	--
GLYMA_11G096800	1136	3.06667	1	58.6667	15.6667	-1.75672	down	0.000808333	0.00651141	At1g29500	K14488 SAUR family protein | (RefSeq) uncharacterized protein LOC100500377 (A)
GLYMA_11G097300	4886	70.6833	33.5567	3213	1308.33	-1.17522	down	5.68069e-09	1.39339e-07	At1g76160	K19791 iron transport multicopper oxidase | (RefSeq) L-ascorbate oxidase homolog (A)
GLYMA_11G097600	558	4.28667	0.11	45.3333	1	-5.41615	down	1.09453e-07	2.22009e-06	--	--
GLYMA_11G097700	1686	3.12667	0.47	43.6667	5.33333	-2.87498	down	1.45981e-06	2.3826e-05	At4g01470	K09866 aquaporin-4 | (RefSeq) XIP1-1; aquaporin TIP1-2 (A)
GLYMA_11G098100	2659	10.8067	5.76667	380.667	167.667	-1.0293	down	0.000672738	0.00554267	At2g21180	--
GLYMA_11G100100	3321	7.55	3.73667	361	145.333	-1.12967	down	0.0018986	0.0134318	At5g23190	K15402 fatty acid omega-hydroxylase [EC:1.14.-.-] | (RefSeq) cytochrome P450 86B1 (A)
GLYMA_11G102400	3511	0.99	0.373333	71.6667	22	-1.53528	down	0.000654337	0.00541706	At4g10130	K17867 diphthamide biosynthesis protein 4 | (RefSeq) DPH4 homolog (A)
GLYMA_11G103200	5065	1.72	0.88	164.333	70	-1.08457	down	0.00011204	0.00116767	At1g09820	--
GLYMA_11G105800	889	14.4333	5.63333	263	85.6667	-1.47205	down	0.000166592	0.00166447	At4g36040	K03686 molecular chaperone DnaJ | (RefSeq) chaperone protein dnaJ A6, chloroplastic (A)
GLYMA_11G106300	4502	160.083	53.5967	10103.7	2871.33	-1.6864	down	9.10466e-27	1.12062e-24	At2g16660	--
GLYMA_11G107100	1492	22.6967	7.48	634.333	172.333	-1.72513	down	1.82159e-12	6.85141e-11	At4g34990	K09422 transcription factor MYB, plant | (RefSeq) MYBZ2; transcription factor MYBZ2 (A)
GLYMA_11G109100	2142	21.9367	10.9433	583.333	241.667	-1.12635	down	8.27132e-07	1.40682e-05	At1g32700	--
GLYMA_11G109600	937	6.26667	1.87333	121.333	29.6667	-1.86693	down	2.7862e-07	5.22261e-06	At3g02910	K19761 gamma-glutamylaminecyclotransferase [EC:2.3.2.-] | (RefSeq) putative gamma-glutamylcyclotransferase At3g02910 (A)
GLYMA_11G111700	2014	2.08333	10.47	73	293.667	2.19489	up	2.48016e-09	6.37491e-08	At5g66320	--
GLYMA_11G111800	6324	0.69	1.64667	35.3333	73.6667	1.16318	up	0.00113544	0.00872868	At1g32940	--
GLYMA_11G113100	942	24.1533	9.96	475.333	159	-1.41084	down	1.86945e-05	0.000238296	--	--
GLYMA_11G114100	3428	0.543333	1.34	35	76	1.22791	up	0.000783119	0.00633356	At1g75820	K00924 kinase [EC:2.7.1.-] | (RefSeq) NARK; nodule autoregulation receptor kinase precursor (A)
GLYMA_11G116000	1133	0.893333	3.07667	20	59.3333	1.67585	up	0.000364885	0.00329394	At2g17070	--
GLYMA_11G117100	3226	25.1733	9.49667	878.333	287.333	-1.50964	down	4.81911e-08	1.0356e-06	At1g68920	K23050 phenylcoumaran benzylic ether reductase [EC:1.3.1.-] | (RefSeq) eugenol synthase 1 (A)
[truncated: 1,833 more rows]
