# Supplementary material for: Gma-miR408 Enhances Soybean Cyst Nematode Susceptibility by Suppressing Reactive Oxygen Species Accumulation
Source: Int J Mol Sci. 2022 Nov 14;23(22):14022. doi: 10.3390/ijms232214022 (PMC9695887; doi:10.3390/ijms232214022)
Supplement: Supplementary file 1 [file ijms-23-14022-s001.zip › Table.S8.xlsx]

## Sheet: Sheet1
Table S8 Common differentially expressed genes (DEGs) between EV vs OE and EV vs STTM.
GeneID	EV vs OE	EV vs STTM	Annotation
GLYMA_01G009900	up	up	At1g32080	--
GLYMA_01G028500	up	up	--	--
GLYMA_01G033300	up	up	At5g17680	K13457 disease resistance protein RPM1 | (RefSeq) disease resistance protein RPM1 (A)
GLYMA_01G036000	up	down	At1g24100	K11820 N-hydroxythioamide S-beta-glucosyltransferase [EC:2.4.1.195] | (RefSeq) UDP-glycosyltransferase 74B1 (A)
GLYMA_01G036300	down	down	--	--
GLYMA_01G040700	up	up	At5g39950	K03671 thioredoxin 1 | (RefSeq) uncharacterized protein LOC100527298 (A)
GLYMA_01G097400	down	down	At4g37870	K01610 phosphoenolpyruvate carboxykinase (ATP) [EC:4.1.1.49] | (RefSeq) phosphoenolpyruvate carboxykinase (ATP) 1 isoform X1 (A)
GLYMA_01G141100	down	down	At2g45360	--
GLYMA_01G145600	up	up	At4g28840	--
GLYMA_01G157400	up	up	At1g76410	K19040 E3 ubiquitin-protein ligase ATL10/75/76/77/78 [EC:2.3.2.27] | (RefSeq) RING-H2 finger protein (A)
GLYMA_01G157700	up	up	At5g65980	K24139 auxin efflux carrier family protein | (RefSeq) protein PIN-LIKES 7 (A)
GLYMA_01G168400	up	up	At1g80160	K08234 glyoxylase I family protein | (RefSeq) GLYI-23; putative lactoylglutathione lyase (A)
GLYMA_01G175200	up	up	At2g25740_1	--
GLYMA_01G186200	up	up	At5g67030	K09838 zeaxanthin epoxidase [EC:1.14.15.21] | (RefSeq) zeaxanthin epoxidase, chloroplastic-like (A)
GLYMA_01G200400	up	up	At2g35380	K00430 peroxidase [EC:1.11.1.7] | (RefSeq) peroxidase 20 precursor (A)
GLYMA_01G204800	up	up	At4g17030	K20628 expansin | (RefSeq) EXPB8; expansin-B3-like precursor (A)
GLYMA_01G210500	down	down	At1g12110	K14638 solute carrier family 15 (peptide/histidine transporter), member 3/4 | (RefSeq) protein NRT1/ PTR FAMILY 8.3 (A)
GLYMA_01G221700	up	up	At1g71480	--
GLYMA_01G235000	up	up	At1g05450	--
GLYMA_02G001500	up	up	At2g26640	K15397 3-ketoacyl-CoA synthase [EC:2.3.1.199] | (RefSeq) 3-ketoacyl-CoA synthase 11 (A)
GLYMA_02G028400	up	down	--	--
GLYMA_02G036400	up	down	At1g23390	--
GLYMA_02G036800	up	up	--	--
GLYMA_02G056400	up	up	At2g18360	K13699 abhydrolase domain-containing protein 5 [EC:2.3.1.51] | (RefSeq) probable 1-acylglycerol-3-phosphate O-acyltransferase isoform X2 (A)
GLYMA_02G059500	down	down	At4g36850	K23678 solute carrier family 66 (lysosomal lysine-arginine transporter), member 1 | (RefSeq) PQ-loop repeat-containing protein (A)
GLYMA_02G062600	up	up	At2g23540	--
GLYMA_02G075000	down	down	At2g14670	K15378 solute carrier family 45, member 1/2/4 | (RefSeq) sucrose transport protein SUC8 (A)
GLYMA_02G083500	up	up	--	--
GLYMA_02G089400	down	up	--	--
GLYMA_02G111200	up	up	--	--
GLYMA_02G119300	up	up	--	--
GLYMA_02G125900	down	up	--	--
GLYMA_02G127300	up	up	At1g68850	K00430 peroxidase [EC:1.11.1.7] | (RefSeq) peroxidase 11 isoform X1 (A)
GLYMA_02G171300	up	down	At5g06710	K09338 homeobox-leucine zipper protein | (RefSeq) homeobox-leucine zipper protein HOX11 (A)
GLYMA_02G206300	up	down	At2g24130	K13420 LRR receptor-like serine/threonine-protein kinase FLS2 [EC:2.7.11.1] | (RefSeq) probable LRR receptor-like serine/threonine-protein kinase At3g47570 (A)
GLYMA_02G244900	up	up	At1g74460	--
GLYMA_02G247000	up	down	At1g66480	--
GLYMA_02G249300	up	up	At3g11430	K13508 glycerol-3-phosphate acyltransferase [EC:2.3.1.15 2.3.1.198] | (RefSeq) glycerol-3-phosphate acyltransferase 5 (A)
GLYMA_02G261600	up	up	At2g40370	K05909 laccase [EC:1.10.3.2] | (RefSeq) laccase-5 (A)
GLYMA_02G261900	up	down	At2g38310	K14496 abscisic acid receptor PYR/PYL family | (RefSeq) abscisic acid receptor PYL4 (A)
GLYMA_03G008100	up	up	At1g01600	K15398 fatty acid omega-hydroxylase [EC:1.14.-.-] | (RefSeq) cytochrome P450 86A8 (A)
GLYMA_03G015800	up	up	At2g45760	--
GLYMA_03G016400	down	up	--	--
GLYMA_03G022800	up	down	At1g24620	K13448 calcium-binding protein CML | (RefSeq) probable calcium-binding protein CML25 (A)
GLYMA_03G024500	up	up	--	--
GLYMA_03G038200	down	down	At5g05340	K00430 peroxidase [EC:1.11.1.7] | (RefSeq) cationic peroxidase 1 (A)
GLYMA_03G038700	down	down	At5g05340	K00430 peroxidase [EC:1.11.1.7] | (RefSeq) peroxidase P7 (A)
GLYMA_03G057100	up	down	At5g05600	K05277 anthocyanidin synthase [EC:1.14.20.4] | (RefSeq) ANS3; leucoanthocyanidin dioxygenase (A)
GLYMA_03G069400	up	up	At3g55610_2	K12657 delta-1-pyrroline-5-carboxylate synthetase [EC:2.7.2.11 1.2.1.41] | (RefSeq) ALDH18B3; delta-1-pyrroline-5-carboxylate synthase (A)
GLYMA_03G103000	up	down	At2g44600	--
GLYMA_03G106000	down	up	At3g50310	K20716 mitogen-activated protein kinase kinase kinase 17/18 | (RefSeq) mitogen-activated protein kinase kinase kinase 18 (A)
GLYMA_03G117500	up	up	At1g69170	--
GLYMA_03G127800	up	up	At2g41180	--
GLYMA_03G129300	up	up	At2g41380	--
GLYMA_03G170300	up	up	At2g20180	K16189 phytochrome-interacting factor 4 | (RefSeq) transcription factor PIF4 isoform X2 (A)
GLYMA_03G173300	up	up	At2g37430	--
GLYMA_03G175300	up	up	At3g53510	K05681 ATP-binding cassette, subfamily G (WHITE), member 2 | (RefSeq) ABC transporter G family member 9 (A)
GLYMA_03G196300	up	up	At5g03890	--
GLYMA_03G208200	down	down	At1g05260	K00430 peroxidase [EC:1.11.1.7] | (RefSeq) peroxidase 3 (A)
GLYMA_03G226200	up	down	At3g62010	--
GLYMA_03G229800	up	up	At1g56600	K18819 inositol 3-alpha-galactosyltransferase [EC:2.4.1.123] | (RefSeq) galactinol synthase 2 (A)
GLYMA_04G004500	up	down	At4g34950	--
GLYMA_04G007300	down	down	At2g16570	K00764 amidophosphoribosyltransferase [EC:2.4.2.14] | (RefSeq) PUR1; amidophosphoribosyltransferase, chloroplastic (A)
GLYMA_04G019200	up	up	At1g47670	K24917 amino acid permease | (RefSeq) amino acid permease 8 (A)
GLYMA_04G021000	up	up	At1g60420	K17609 nucleoredoxin [EC:1.8.1.8] | (RefSeq) thioredoxin-like superfamily protein (A)
GLYMA_04G042100	down	down	At3g16150	K13051 L-asparaginase / beta-aspartyl-peptidase [EC:3.5.1.1 3.4.19.5] | (RefSeq) probable isoaspartyl peptidase/L-asparaginase 2-like (A)
GLYMA_04G042400	up	down	At5g24080	K13430 serine/threonine-protein kinase PBS1 [EC:2.7.11.1] | (RefSeq) probable serine/threonine-protein kinase PBL7 (A)
GLYMA_04G052000	up	up	At2g26150	K09419 heat shock transcription factor, other eukaryote | (RefSeq) HSF-08; heat stress transcription factor 8 (A)
GLYMA_04G064800	up	up	At4g32060	K22827 calcium uptake protein 1, mitochondrial | (RefSeq) calcium uptake protein, mitochondrial (A)
GLYMA_04G099200	up	up	At1g22470	--
GLYMA_04G101900	up	up	At1g34670	K09422 transcription factor MYB, plant | (RefSeq) transcription factor MYB93 (A)
GLYMA_04G102700	down	down	At1g34580	K24193 MFS transporter, SP family, sugar:H+ symporter | (RefSeq) sugar transport protein 5 (A)
GLYMA_04G140900	up	up	At5g10230	K17098 annexin D | (RefSeq) annexin-like protein RJ4 isoform X1 (A)
GLYMA_04G147600	up	up	At2g26660	K24195 xenotropic and polytropic retrovirus receptor 1 | (RefSeq) PHO1-H1; phosphate transporter PHO1 (A)
GLYMA_04G168500	up	up	At1g74460	K00660 chalcone synthase [EC:2.3.1.74] | (RefSeq) CHS14; chalcone synthase (A)
GLYMA_04G185400	up	down	At2g01210	--
GLYMA_04G187700	up	up	At5g63130	--
GLYMA_04G190700	up	up	At5g50260	K16292 KDEL-tailed cysteine endopeptidase [EC:3.4.22.-] | (RefSeq) CYSP1; cysteine proteinase precursor (A)
GLYMA_04G196400	up	up	At3g01930	--
GLYMA_04G197400	up	up	At1g08510	K10781 fatty acyl-ACP thioesterase B [EC:3.1.2.14 3.1.2.21] | (RefSeq) palmitoyl-acyl carrier protein thioesterase, chloroplastic isoform X1 (A)
GLYMA_04G198400	up	up	At5g50800	K15382 solute carrier family 50 (sugar transporter) | (RefSeq) SWEET4; sugar efflux transporter SWEET4 (A)
GLYMA_04G198600	up	up	At5g23660	K15382 solute carrier family 50 (sugar transporter) | (RefSeq) SWEET15; sugar efflux transporter SWEET15 (A)
GLYMA_04G212000	up	up	At5g64530	--
GLYMA_04G222500	down	down	At5g05250	--
GLYMA_04G229700	up	up	At5g03890	--
GLYMA_05G003900	up	up	At5g40390	K06617 raffinose synthase [EC:2.4.1.82] | (RefSeq) galactinol--sucrose galactosyltransferase (A)
GLYMA_05G011900	up	up	At2g26910	K05681 ATP-binding cassette, subfamily G (WHITE), member 2 | (RefSeq) ABC transporter G family member 9 (A)
GLYMA_05G023900	up	up	At3g25400	K16904 dCTP diphosphatase [EC:3.6.1.12] | (RefSeq) nucleoside triphosphate pyrophosphohydrolase-like (A)
GLYMA_05G026100	up	up	At1g74460	--
GLYMA_05G034700	up	up	At1g10200	K09377 cysteine and glycine-rich protein | (RefSeq) LIM domain-containing protein WLIM1 (A)
GLYMA_05G050500	down	down	At1g63000	K12451 3,5-epimerase/4-reductase [EC:5.1.3.- 1.1.1.-] | (RefSeq) LOW QUALITY PROTEIN: bifunctional dTDP-4-dehydrorhamnose 3,5-epimerase/dTDP-4-dehydrorhamnose reductase (A)
GLYMA_05G126800	up	up	At5g61820	--
GLYMA_05G128200	up	down	At5g46330	K13420 LRR receptor-like serine/threonine-protein kinase FLS2 [EC:2.7.11.1] | (RefSeq) LRR receptor-like serine/threonine-protein kinase FLS2 (A)
GLYMA_05G137800	down	down	At1g17020	K05278 flavonol synthase [EC:1.14.20.6] | (RefSeq) flavonol synthase/flavanone 3-hydroxylase (A)
GLYMA_05G170900	up	up	At4g20390	--
GLYMA_05G186700	up	down	At5g64750	K09286 EREBP-like factor | (RefSeq) ERF7; ethylene-responsive transcription factor 7 (A)
GLYMA_05G188900	up	up	At1g49210	K19040 E3 ubiquitin-protein ligase ATL10/75/76/77/78 [EC:2.3.2.27] | (RefSeq) RING-H2 finger protein ATL78 (A)
GLYMA_05G191500	up	up	--	--
GLYMA_05G192300	up	up	--	--
GLYMA_05G202300	down	up	At5g13180	--
GLYMA_05G211700	down	up	At4g11280	K20772 1-aminocyclopropane-1-carboxylate synthase 1/2/6 [EC:4.4.1.14] | (RefSeq) ACS1; 1-aminocyclopropane-1-carboxylate synthase (A)
GLYMA_05G212300	up	up	At5g41590	--
GLYMA_05G215900	down	up	At4g23810	K13425 WRKY transcription factor 22 | (RefSeq) WRKY transcription factor 22 (A)
GLYMA_05G216000	up	up	--	--
GLYMA_05G222400	up	down	At2g19590	K05933 aminocyclopropanecarboxylate oxidase [EC:1.14.17.4] | (RefSeq) 1-aminocyclopropane-1-carboxylate oxidase 1 (A)
GLYMA_05G234600	down	up	At1g68320	K09422 transcription factor MYB, plant | (RefSeq) MYB84; MYB transcription factor MYB84 (A)
GLYMA_05G247800	up	up	At1g14700	K14379 tartrate-resistant acid phosphatase type 5 [EC:3.1.3.2] | (RefSeq) uncharacterized protein LOC100817359 precursor (A)
GLYMA_06G004300	up	down	At4g34950	--
GLYMA_06G021200	up	up	At1g60420	K17609 nucleoredoxin [EC:1.8.1.8] | (RefSeq) probable nucleoredoxin 2 isoform X2 (A)
GLYMA_06G031000	up	down	At1g19530	--
GLYMA_06G031100	up	down	At1g19530	--
GLYMA_06G035300	up	down	At4g31940	K23136 fraxetin 5-hydroxylase [EC:1.14.14.164] | (RefSeq) xanthotoxin 5-hydroxylase CYP82C4 (A)
GLYMA_06G048600	up	up	--	--
GLYMA_06G051500	up	down	At5g11790	K18266 protein NDRG1 | (RefSeq) uncharacterized protein LOC100803300 (A)
GLYMA_06G051900	up	up	At5g56840	--
GLYMA_06G058500	up	up	At2g26250	K15397 3-ketoacyl-CoA synthase [EC:2.3.1.199] | (RefSeq) 3-ketoacyl-CoA synthase 10 (A)
GLYMA_06G059700	up	up	At5g24940	K17506 protein phosphatase 1L [EC:3.1.3.16] | (RefSeq) uncharacterized protein LOC100807396 (A)
GLYMA_06G066600	up	up	At5g11100	K12486 stromal membrane-associated protein | (RefSeq) ADP-ribosylation factor GTPase-activating protein AGD12 (A)
GLYMA_06G079500	up	up	At5g10580	--
GLYMA_06G081100	up	up	At5g25610	--
GLYMA_06G103300	up	up	At1g34670	K09422 transcription factor MYB, plant | (RefSeq) transcription factor MYB93 (A)
GLYMA_06G104800	up	up	At5g65140	K01087 trehalose 6-phosphate phosphatase [EC:3.1.3.12] | (RefSeq) probable trehalose-phosphate phosphatase J isoform X2 (A)
GLYMA_06G106700	up	up	At4g08570	K07213 copper chaperone | (RefSeq) copper chaperone homolog CCH (A)
GLYMA_06G111300	up	up	At1g77640	K09286 EREBP-like factor | (RefSeq) ethylene-responsive transcription factor ERF010 (A)
GLYMA_06G111600	up	up	At4g08290	--
GLYMA_06G129800	down	up	At5g53030	--
GLYMA_06G142200	up	up	--	--
GLYMA_06G148400	up	down	At5g64750	K09286 EREBP-like factor | (RefSeq) ERF5; ethylene-responsive transcription factor RAP2-3-like (A)
GLYMA_06G155100	up	up	At5g63970	K16280 E3 ubiquitin-protein ligase RGLG [EC:2.3.2.27] | (RefSeq) LOW QUALITY PROTEIN: E3 ubiquitin-protein ligase RGLG3 (A)
GLYMA_06G158000	up	up	At5g64440	K02433 aspartyl-tRNA(Asn)/glutamyl-tRNA(Gln) amidotransferase subunit A [EC:6.3.5.6 6.3.5.7] | (RefSeq) glutamyl-tRNA(Gln) amidotransferase subunit A, chloroplastic/mitochondrial (A)
GLYMA_06G166800	up	up	At5g23660	K15382 solute carrier family 50 (sugar transporter) | (RefSeq) SWEET15; sugar efflux transporter SWEET15 (A)
GLYMA_06G167000	up	up	At5g50790	K15382 solute carrier family 50 (sugar transporter) | (RefSeq) SWEET17; sugar efflux transporter SWEET17 (A)
GLYMA_06G167600	up	up	At5g41040	K15400 omega-hydroxypalmitate O-feruloyl transferase [EC:2.3.1.188] | (RefSeq) omega-hydroxypalmitate O-feruloyl transferase (A)
GLYMA_06G167900	up	up	At5g50720	K17279 receptor expression-enhancing protein 5/6 | (RefSeq) HVA22-like protein e isoform X2 (A)
GLYMA_06G168100	up	up	At1g08510	K10781 fatty acyl-ACP thioesterase B [EC:3.1.2.14 3.1.2.21] | (RefSeq) palmitoyl-acyl carrier protein thioesterase, chloroplastic isoform X1 (A)
GLYMA_06G194500	up	up	At1g74460	K00660 chalcone synthase [EC:2.3.1.74] | (RefSeq) CHS14; chalcone synthase (A)
GLYMA_06G194600	up	up	--	--
GLYMA_06G222500	up	up	At3g03080	K00224 chloroplastic oxoene reductase [EC:1.3.1.-] | (RefSeq) chloroplast envelope quinone oxidoreductase homolog isoform X1 (A)
GLYMA_06G290200	up	down	At2g20630	K17506 protein phosphatase 1L [EC:3.1.3.16] | (RefSeq) probable protein phosphatase 2C 58 (A)
GLYMA_06G293400	up	down	At4g03510	K10666 E3 ubiquitin-protein ligase RNF5 [EC:2.3.2.27] | (RefSeq) uncharacterized protein LOC100786373 (A)
GLYMA_06G294400	up	down	At4g14400	K15503 serine/threonine-protein phosphatase 6 regulatory ankyrin repeat subunit B | (RefSeq) protein ACCELERATED CELL DEATH 6 (A)
GLYMA_06G303200	down	down	At3g21720	K01637 isocitrate lyase [EC:4.1.3.1] | (RefSeq) ICL1; isocitrate lyase 1 (A)
GLYMA_07G039100	down	down	At5g20630	--
GLYMA_07G069500	up	up	At1g01600	K15398 fatty acid omega-hydroxylase [EC:1.14.-.-] | (RefSeq) cytochrome P450 86A8 (A)
GLYMA_07G069700	up	up	At1g01610	K13508 glycerol-3-phosphate acyltransferase [EC:2.3.1.15 2.3.1.198] | (RefSeq) probable glycerol-3-phosphate acyltransferase 8 (A)
GLYMA_07G071300	up	down	At4g00520	K01068 acyl-coenzyme A thioesterase 1/2/4 [EC:3.1.2.2] | (RefSeq) acyl-CoA thioesterase 2 isoform X2 (A)
GLYMA_07G104200	up	up	At1g18300	K07766 diphosphoinositol-polyphosphate diphosphatase [EC:3.6.1.52] | (RefSeq) nudix hydrolase 18, mitochondrial (A)
GLYMA_07G104300	up	down	At1g67920	--
GLYMA_07G125600	up	down	At5g56550	--
GLYMA_07G139700	up	up	At3g09270	K00799 glutathione S-transferase [EC:2.5.1.18] | (RefSeq) HSP26-A; probable glutathione S-transferase (A)
GLYMA_07G143900	up	up	At1g74180	--
GLYMA_07G146800	up	up	At2g38110	K13508 glycerol-3-phosphate acyltransferase [EC:2.3.1.15 2.3.1.198] | (RefSeq) glycerol-3-phosphate 2-O-acyltransferase 6 (A)
GLYMA_07G155200	up	up	At5g01600	K00522 ferritin heavy chain [EC:1.16.3.2] | (RefSeq) ferritin (A)
GLYMA_07G181300	up	up	--	--
GLYMA_07G195300	up	down	At4g27450	--
GLYMA_07G208700	up	down	At2g15890	--
GLYMA_07G211500	up	up	At1g49670_2	K00344 NADPH:quinone reductase [EC:1.6.5.5] | (RefSeq) quinone oxidoreductase-like protein 2 homolog (A)
GLYMA_07G251200	up	up	At4g15630	--
GLYMA_07G253600	down	down	At3g21550	--
GLYMA_08G000700	up	up	--	--
GLYMA_08G009700	down	up	At5g13180	--
GLYMA_08G010400	up	down	At5g50760	K14488 SAUR family protein | (RefSeq) auxin-responsive protein SAUR71 (A)
GLYMA_08G013600	up	up	At1g63440	K17686 P-type Cu+ transporter [EC:7.2.2.8] | (RefSeq) probable copper-transporting ATPase HMA5 (A)
GLYMA_08G024700	up	up	At5g46290	K09458 3-oxoacyl-[acyl-carrier-protein] synthase II [EC:2.3.1.179] | (RefSeq) 3-oxoacyl-[acyl-carrier-protein] synthase I, chloroplastic isoform X4 (A)
GLYMA_08G032800	up	down	At5g56550	--
GLYMA_08G056400	up	up	At3g17790	K14379 tartrate-resistant acid phosphatase type 5 [EC:3.1.3.2] | (RefSeq) purple acid phosphatase 17 isoform X1 (A)
GLYMA_08G069100	up	up	--	--
GLYMA_08G083300	up	down	At5g46330	K13420 LRR receptor-like serine/threonine-protein kinase FLS2 [EC:2.7.11.1] | (RefSeq) LRR receptor-like serine/threonine-protein kinase FLS2 (A)
GLYMA_08G118500	up	up	At1g29290	--
GLYMA_08G129300	up	up	At4g20390	--
GLYMA_08G131900	up	up	--	--
GLYMA_08G145300	up	down	At5g64750	K09286 EREBP-like factor | (RefSeq) APETALA2/ethylene responsive factor-like protein (A)
GLYMA_08G170400	up	down	At3g12920	K19042 E3 ubiquitin-protein ligase BOI and related proteins [EC:2.3.2.27] | (RefSeq) probable BOI-related E3 ubiquitin-protein ligase 3 (A)
GLYMA_08G194900	up	up	At1g17710	K13248 pyridoxal phosphate phosphatase PHOSPHO2 [EC:3.1.3.74] | (RefSeq) inorganic pyrophosphatase 2 (A)
GLYMA_08G212900	up	down	At3g15850	K20416 palmitoyl-[glycerolipid] 7-desaturase [EC:1.14.19.42] | (RefSeq) FAD5.2; delta-7 desaturase (A)
GLYMA_08G254400	up	up	At3g30530	--
GLYMA_08G295600	up	up	At5g39950	K03671 thioredoxin 1 | (RefSeq) uncharacterized protein LOC100527572 (A)
GLYMA_08G321400	up	up	At5g10770	K22683 aspartyl protease family protein [EC:3.4.23.-] | (RefSeq) aspartyl protease family protein 2 (A)
GLYMA_08G321500	down	down	At5g10770	K22683 aspartyl protease family protein [EC:3.4.23.-] | (RefSeq) aspartyl protease family protein 2 (A)
GLYMA_08G321700	up	up	At3g20300	--
GLYMA_08G324300	down	down	At4g26690	K01126 glycerophosphoryl diester phosphodiesterase [EC:3.1.4.46] | (RefSeq) putative glycerophosphoryl diester phosphodiesterase precursor (A)
GLYMA_08G355200	up	down	At5g24080	K13415 protein brassinosteroid insensitive 1 [EC:2.7.10.1 2.7.11.1] | (RefSeq) BRI1B; brassinosteroid receptor precursor (A)
GLYMA_09G005300	down	up	At4g04480	--
GLYMA_09G028000	up	up	At5g11720	K01187 alpha-glucosidase [EC:3.2.1.20] | (RefSeq) alpha-glucosidase (A)
GLYMA_09G036800	up	up	--	--
GLYMA_09G038800	up	up	At5g49350	--
GLYMA_09G040600	up	up	--	--
GLYMA_09G056600	down	up	At4g30180	--
GLYMA_09G129100	up	down	At5g52830	K13425 WRKY transcription factor 22 | (RefSeq) probable WRKY transcription factor 27 (A)
GLYMA_09G140700	up	up	At3g05200	K10664 E3 ubiquitin-protein ligase ATL6/9/15/31/42/55 [EC:2.3.2.27] | (RefSeq) E3 ubiquitin-protein ligase ATL6-like (A)
GLYMA_09G145700	up	down	At3g61060	--
GLYMA_09G185500	up	up	--	--
GLYMA_09G245400	up	up	At2g44740	--
GLYMA_09G254400	up	up	At5g41570	K13424 WRKY transcription factor 33 | (RefSeq) WRKY62; WRKY transcription factor 62 (A)
GLYMA_09G275300	up	up	At5g01880	K19040 E3 ubiquitin-protein ligase ATL10/75/76/77/78 [EC:2.3.2.27] | (RefSeq) RING-H2 finger protein (A)
GLYMA_09G282500	up	up	At1g04600	K10357 myosin V | (RefSeq) myosin-7 (A)
GLYMA_09G284700	down	down	At4g11290	K00430 peroxidase [EC:1.11.1.7] | (RefSeq) peroxidase 5 (A)
GLYMA_10G021400	up	up	At2g47890	--
GLYMA_10G028100	up	up	At2g48130	--
GLYMA_10G028200	up	up	At2g48140	K02895 large subunit ribosomal protein L24 | (RefSeq) LOW QUALITY PROTEIN: 50S ribosomal protein L24-like (A)
GLYMA_10G028300	up	up	At3g22640	--
GLYMA_10G047100	up	up	At2g37330	K02069 UDP-glucose/iron transport system permease protein | (RefSeq) protein ALUMINUM SENSITIVE 3 (A)
GLYMA_10G063000	up	up	At2g36690	K24028 salicylic acid 3-hydroxylase [EC:1.14.11.-] | (RefSeq) protein DMR6-LIKE OXYGENASE 2 isoform X1 (A)
GLYMA_10G081900	up	down	At2g35930	--
GLYMA_10G112700	up	up	At1g50480	K01938 formate--tetrahydrofolate ligase [EC:6.3.4.3] | (RefSeq) formate--tetrahydrofolate ligase isoform X1 (A)
GLYMA_10G119400	down	down	At5g59190	--
GLYMA_10G147900	up	up	At1g56320	--
GLYMA_10G172600	up	up	At4g24140	K13699 abhydrolase domain-containing protein 5 [EC:2.3.1.51] | (RefSeq) probable 1-acylglycerol-3-phosphate O-acyltransferase (A)
GLYMA_10G179400	up	up	At2g26640	K15397 3-ketoacyl-CoA synthase [EC:2.3.1.199] | (RefSeq) 3-ketoacyl-CoA synthase 11 (A)
GLYMA_10G181200	up	up	At2g31160	--
GLYMA_10G186700	up	up	--	--
GLYMA_10G193600	up	up	At2g32300	--
GLYMA_10G195700	up	down	At1g73080	K20718 LRR receptor-like serine/threonine-protein kinase ERECTA [EC:2.7.11.1] | (RefSeq) LRR receptor-like serine/threonine-protein kinase ERECTA (A)
GLYMA_10G209800	up	up	At3g53260	K10775 phenylalanine ammonia-lyase [EC:4.3.1.24] | (RefSeq) PAL2.4; phenylalanine ammonia-lyase 2 isoform X1 (A)
GLYMA_10G228900	up	up	At5g24080	K13416 brassinosteroid insensitive 1-associated receptor kinase 1 [EC:2.7.10.1 2.7.11.1] | (RefSeq) BRASSINOSTEROID INSENSITIVE 1-associated receptor kinase 1 (A)
GLYMA_10G231600	down	down	At5g23980	K00521 ferric-chelate reductase [EC:1.16.1.7] | (RefSeq) ferric reduction oxidase 4 isoform X1 (A)
GLYMA_10G234700	down	up	At5g52400	K20661 cytochrome P450 family 714 subfamily A1 | (RefSeq) LOW QUALITY PROTEIN: cytochrome P450 714A1-like (A)
GLYMA_10G236000	up	up	At5g52300	--
GLYMA_10G239300	up	down	At1g63040	K09286 EREBP-like factor | (RefSeq) AP2-2; AP2 domain-containing transcription factor 2 (A)
GLYMA_10G246800	up	up	At3g22620	--
GLYMA_10G253300	up	up	At1g42375	K13430 serine/threonine-protein kinase PBS1 [EC:2.7.11.1] | (RefSeq) serine/threonine-protein kinase PBS1 isoform X2 (A)
GLYMA_10G264100	up	up	At1g71050	K07213 copper chaperone | (RefSeq) copper chaperone homolog CCH (A)
GLYMA_10G272000	down	up	At1g68390	--
GLYMA_11G014800	up	down	At1g71520	K09286 EREBP-like factor | (RefSeq) ethylene-responsive transcription factor ERF010 (A)
GLYMA_11G019600	up	up	--	--
GLYMA_11G062500	down	down	At3g26300	K13267 flavonoid 6-hydroxylase [EC:1.14.13.-] | (RefSeq) F6H2; cytochrome P450 71D9-like (A)
GLYMA_11G085900	up	up	At4g35560	K08518 syntaxin-binding protein 5 | (RefSeq) uncharacterized protein LOC100777534 isoform X1 (A)
GLYMA_11G093300	down	down	At1g51410	--
GLYMA_11G096600	down	up	At2g17040	--
GLYMA_11G097000	up	up	At1g47670	K24917 amino acid permease | (RefSeq) amino acid permease 6 (A)
GLYMA_11G100100	up	up	At5g23190	K15402 fatty acid omega-hydroxylase [EC:1.14.-.-] | (RefSeq) cytochrome P450 86B1 (A)
GLYMA_11G129600	down	up	At2g44480	K01188 beta-glucosidase [EC:3.2.1.21] | (RefSeq) cyanogenic beta-glucosidase (A)
GLYMA_11G129700	down	up	At2g44450	K01188 beta-glucosidase [EC:3.2.1.21] | (RefSeq) cyanogenic beta-glucosidase (A)
GLYMA_11G129800	down	up	At2g44450	K01188 beta-glucosidase [EC:3.2.1.21] | (RefSeq) cyanogenic beta-glucosidase (A)
GLYMA_11G137000	down	down	At2g29190	K17943 pumilio RNA-binding family | (RefSeq) pumilio homolog 2 (A)
GLYMA_11G142200	up	up	--	--
GLYMA_11G143300	up	down	At2g28690	--
GLYMA_11G175900	up	up	At5g58860	K15401 long-chain fatty acid omega-monooxygenase [EC:1.14.14.80] | (RefSeq) cytochrome P450 86A1 (A)
GLYMA_11G185000	up	up	At4g33790	K13356 alcohol-forming fatty acyl-CoA reductase [EC:1.2.1.84] | (RefSeq) alcohol-forming fatty acyl-CoA reductase (A)
GLYMA_11G244900	down	down	At5g63180	K01728 pectate lyase [EC:4.2.2.2] | (RefSeq) probable pectate lyase 5 (A)
GLYMA_12G031300	up	down	At4g34950	--
GLYMA_12G042400	down	down	At4g39210	K00975 glucose-1-phosphate adenylyltransferase [EC:2.7.7.27] | (RefSeq) glucose-1-phosphate adenylyltransferase large subunit 1 (A)
GLYMA_12G046800	up	up	At5g66580	--
GLYMA_12G047400	up	up	At1g49430	K01897 long-chain acyl-CoA synthetase [EC:6.2.1.3] | (RefSeq) long chain acyl-CoA synthetase 2 (A)
GLYMA_12G054000	up	down	At2g44480	K01188 beta-glucosidase [EC:3.2.1.21] | (RefSeq) cyanogenic beta-glucosidase (A)
GLYMA_12G054700	down	down	At3g45140	K00454 lipoxygenase [EC:1.13.11.12] | (RefSeq) linoleate 13S-lipoxygenase 2-1, chloroplastic (A)
GLYMA_12G065500	up	up	--	--
GLYMA_12G068900	up	up	At5g03170	--
GLYMA_12G078900	up	up	At5g60770	K02575 MFS transporter, NNP family, nitrate/nitrite transporter | (RefSeq) high affinity nitrate transporter 2.4 (A)
GLYMA_12G087400	up	up	At4g33790	K13356 alcohol-forming fatty acyl-CoA reductase [EC:1.2.1.84] | (RefSeq) alcohol-forming fatty acyl-CoA reductase (A)
GLYMA_12G095000	down	down	At3g11840	--
GLYMA_12G102300	down	up	At3g22104	--
GLYMA_12G109700	up	up	At1g03620	K23538 ELMO domain-containing protein | (RefSeq) ELMO domain-containing protein A isoform X2 (A)
GLYMA_12G192600	up	down	At5g42570	K14009 B-cell receptor-associated protein 31 | (RefSeq) B-cell receptor-associated protein 31 (A)
GLYMA_12G196600	up	up	At2g32300	--
GLYMA_12G201000	up	down	At4g28240	--
GLYMA_12G205600	up	down	--	--
GLYMA_12G205700	up	down	At1g03790	K23047 E3 ubiquitin-protein ligase UNKL [EC:2.3.2.27] | (RefSeq) zinc finger CCCH domain-containing protein 2 (A)
GLYMA_12G217500	down	up	At4g27280	K24345 calcium-binding protein KIC and related proteins | (RefSeq) calcium-binding EF-hand family protein (A)
GLYMA_12G225700	up	up	--	--
GLYMA_13G029200	up	up	At3g63470	K16297 serine carboxypeptidase-like clade II [EC:3.4.16.-] | (RefSeq) serine carboxypeptidase 1 (A)
GLYMA_13G035100	up	down	At1g21550	K13448 calcium-binding protein CML | (RefSeq) probable calcium-binding protein CML44 (A)
GLYMA_13G035900	up	up	At1g21270	K13436 pto-interacting protein 1 [EC:2.7.11.1] | (RefSeq) pto-interacting protein 1-like (A)
GLYMA_13G039800	up	down	At1g21320_1	K20725 MAP kinase substrate 1 | (RefSeq) nuclear speckle RNA-binding protein B (A)
GLYMA_13G077800	up	up	At4g08290	--
GLYMA_13G116700	up	up	At1g11910	K08245 phytepsin [EC:3.4.23.40] | (RefSeq) cyprosin isoform X2 (A)
GLYMA_13G133000	down	up	At2g28200	--
GLYMA_13G143200	up	up	At3g09870	K14488 SAUR family protein | (RefSeq) auxin-responsive protein SAUR32 (A)
GLYMA_13G161500	up	up	At5g20270	K07297 adiponectin receptor | (RefSeq) heptahelical transmembrane protein 1 (A)
GLYMA_13G162600	up	up	At5g20410	K03715 1,2-diacylglycerol 3-beta-galactosyltransferase [EC:2.4.1.46] | (RefSeq) monogalactosyldiacylglycerol synthase 2, chloroplastic (A)
GLYMA_13G172500	up	up	At5g45960	--
GLYMA_13G176400	up	down	CE01921	K08770 ubiquitin C | (RefSeq) polyubiquitin 3 (A)
GLYMA_13G186500	up	up	At5g13750	--
GLYMA_13G203000	up	up	At3g08040	--
GLYMA_13G221900	up	up	At2g22920	K16296 serine carboxypeptidase-like clade I [EC:3.4.16.-] | (RefSeq) serine carboxypeptidase-like 12 isoform X1 (A)
GLYMA_13G222100	up	down	At1g17020	K05278 flavonol synthase [EC:1.14.20.6] | (RefSeq) flavonol synthase/flavanone 3-hydroxylase (A)
GLYMA_13G251700	down	down	At3g19690	K13449 pathogenesis-related protein 1 | (RefSeq) PR1-3; pathogenesis-related protein 1 precursor (A)
GLYMA_13G257600	up	up	--	--
GLYMA_13G257800	up	up	--	--
GLYMA_13G259500	up	down	At1g78440	K04125 gibberellin 2beta-dioxygenase [EC:1.14.11.13] | (RefSeq) GA2OX7; gibberellin 2-beta-dioxygenase 1 (A)
GLYMA_13G267700	up	up	At3g56400	K13424 WRKY transcription factor 33 | (RefSeq) WRKY39; WRKY transcription factor 39 (A)
GLYMA_13G295000	up	up	At5g53970	K00815 tyrosine aminotransferase [EC:2.6.1.5] | (RefSeq) nicotianamine aminotransferase 1 (A)
GLYMA_13G296800	up	down	At4g28310	--
GLYMA_13G305600	up	up	At2g32300	--
GLYMA_13G317700	up	up	At4g33790	K13356 alcohol-forming fatty acyl-CoA reductase [EC:1.2.1.84] | (RefSeq) fatty acyl-CoA reductase 3 isoform X1 (A)
GLYMA_13G338300	down	down	At1g55910	K14709 solute carrier family 39 (zinc transporter), member 1/2/3 | (RefSeq) zinc transporter 1 (A)
GLYMA_13G340800	up	up	At3g57670	--
GLYMA_13G351600	up	up	At1g17710	K13248 pyridoxal phosphate phosphatase PHOSPHO2 [EC:3.1.3.74] | (RefSeq) inorganic pyrophosphatase 2-like (A)
GLYMA_13G360000	up	up	At3g15990	K17471 sulfate transporter 3 | (RefSeq) probable sulfate transporter 3.4 (A)
GLYMA_13G360600	up	down	At1g80440	--
GLYMA_14G016000	up	down	At5g48150	K14494 DELLA protein | (RefSeq) DELLA protein 1 (A)
GLYMA_14G023000	down	down	At4g38460	K13789 geranylgeranyl diphosphate synthase, type II [EC:2.5.1.1 2.5.1.10 2.5.1.29] | (RefSeq) GPPS; geranyl-diphosphate synthase (A)
GLYMA_14G027000	up	up	At1g74520	K17279 receptor expression-enhancing protein 5/6 | (RefSeq) HVA22-like protein f (A)
GLYMA_14G028300	up	up	At1g06520	K13508 glycerol-3-phosphate acyltransferase [EC:2.3.1.15 2.3.1.198] | (RefSeq) glycerol-3-phosphate acyltransferase 1 (A)
GLYMA_14G039800	up	down	--	--
GLYMA_14G043200	up	up	--	K00021 hydroxymethylglutaryl-CoA reductase (NADPH) [EC:1.1.1.34] | (RefSeq) 3-hydroxy-3-methylglutaryl-coenzyme A reductase 1 (A)
GLYMA_14G067200	up	up	At3g11430	K13508 glycerol-3-phosphate acyltransferase [EC:2.3.1.15 2.3.1.198] | (RefSeq) glycerol-3-phosphate acyltransferase 5 (A)
GLYMA_14G069200	up	down	At1g66480	--
GLYMA_14G089800	up	up	--	--
GLYMA_14G098700	up	up	--	--
GLYMA_14G130800	down	up	At5g11460	--
GLYMA_14G139400	up	up	At5g10580	--
GLYMA_14G148100	up	up	At4g08290	--
GLYMA_14G158600	down	down	At1g21230	K13436 pto-interacting protein 1 [EC:2.7.11.1] | (RefSeq) PTI1-like tyrosine-protein kinase 3-like (A)
GLYMA_14G175400	up	down	At1g22360	K13691 pathogen-inducible salicylic acid glucosyltransferase [EC:2.4.1.-] | (RefSeq) UDP-glycosyltransferase 74G1 (A)
GLYMA_14G185100	up	down	At5g65640	K13422 transcription factor MYC2 | (RefSeq) transcription factor MYC1 (A)
GLYMA_14G193400	up	up	At2g38170	K07300 Ca2+:H+ antiporter | (RefSeq) vacuolar cation/proton exchanger 3 (A)
GLYMA_14G195000	up	up	At3g47340	K01953 asparagine synthase (glutamine-hydrolysing) [EC:6.3.5.4] | (RefSeq) AS2; asparagine synthetase 2 (A)
GLYMA_15G040700	up	up	At2g28710	--
GLYMA_15G051200	up	up	At5g64530	--
GLYMA_15G057300	up	up	--	--
GLYMA_15G057400	up	up	--	--
GLYMA_15G057500	up	up	--	--
GLYMA_15G082400	up	down	At2g34140	--
GLYMA_15G087600	down	down	At2g14640_2	--
GLYMA_15G093900	up	down	At1g30040	K04125 gibberellin 2beta-dioxygenase [EC:1.14.11.13] | (RefSeq) GA2OX8; gibberellin 2-beta-dioxygenase 8 (A)
GLYMA_15G098100	up	down	At5g18670	K01177 beta-amylase [EC:3.2.1.2] | (RefSeq) beta-amylase 1, chloroplastic (A)
GLYMA_15G109900	down	up	At4g04480	--
GLYMA_15G112500	up	up	At4g04020	--
GLYMA_15G118800	up	up	At4g14540	K08065 nuclear transcription Y subunit beta | (RefSeq) nuclear transcription factor Y subunit B-3 (A)
GLYMA_15G126400	up	down	At4g19700	K19042 E3 ubiquitin-protein ligase BOI and related proteins [EC:2.3.2.27] | (RefSeq) BOI-related E3 ubiquitin-protein ligase 1 (A)
GLYMA_15G143900	up	up	At5g49350	--
GLYMA_15G146000	up	up	--	--
GLYMA_15G179800	up	up	At5g20700	--
GLYMA_15G180000	up	up	At1g19210	K09286 EREBP-like factor | (RefSeq) ethylene-responsive transcription factor ERF023 (A)
GLYMA_15G182000	up	up	At1g19230	K13447 respiratory burst oxidase [EC:1.6.3.- 1.11.1.-] | (RefSeq) respiratory burst oxidase homolog protein E isoform X1 (A)
GLYMA_15G191800	up	up	At4g20390	--
GLYMA_15G198500	up	up	At1g80520	--
GLYMA_15G214300	up	up	At1g65800	K13430 serine/threonine-protein kinase PBS1 [EC:2.7.11.1] | (RefSeq) serine/threonine-protein kinase (A)
GLYMA_15G223500	down	down	At3g10720	K01051 pectinesterase [EC:3.1.1.11] | (RefSeq) probable pectinesterase/pectinesterase inhibitor 47 (A)
GLYMA_15G232400	up	down	At5g17680	--
GLYMA_15G245000	up	up	At3g14680	K17873 11-oxo-beta-amyrin 30-oxidase [EC:1.14.14.115] | (RefSeq) 11-oxo-beta-amyrin 30-oxidase (A)
GLYMA_15G245100	up	up	At3g14630	K17873 11-oxo-beta-amyrin 30-oxidase [EC:1.14.14.115] | (RefSeq) 11-oxo-beta-amyrin 30-oxidase (A)
GLYMA_15G245300	up	up	At3g14630	K17873 11-oxo-beta-amyrin 30-oxidase [EC:1.14.14.115] | (RefSeq) 11-oxo-beta-amyrin 30-oxidase (A)
GLYMA_15G252000	up	up	At1g78380	K00799 glutathione S-transferase [EC:2.5.1.18] | (RefSeq) LOW QUALITY PROTEIN: glutathione S-transferase 3 (A)
GLYMA_15G256000	up	up	--	--
GLYMA_15G264300	up	up	At1g53920	--
GLYMA_15G272600	up	up	--	--
GLYMA_16G021000	up	up	At3g61890	K09338 homeobox-leucine zipper protein | (RefSeq) homeobox-leucine zipper protein ATHB-12 (A)
GLYMA_16G031400	up	up	At1g64000	K18835 WRKY transcription factor 2 | (RefSeq) WRKY59; probable WRKY transcription factor 2 (A)
GLYMA_16G063500	down	down	At4g12560	--
GLYMA_16G144900	up	up	At2g23540	--
GLYMA_16G148600	up	down	At3g26690	K07766 diphosphoinositol-polyphosphate diphosphatase [EC:3.6.1.52] | (RefSeq) nudix hydrolase 12, mitochondrial (A)
GLYMA_16G148900	up	up	At5g13900	--
GLYMA_16G200700	up	up	At2g45650	K09264 MADS-box transcription factor, plant | (RefSeq) uncharacterized protein LOC100779279 (A)
GLYMA_16G204700	down	up	At1g12380	--
GLYMA_16G207500	down	down	At4g33420	K00430 peroxidase [EC:1.11.1.7] | (RefSeq) peroxidase 47 (A)
GLYMA_16G216500	up	up	At1g73220	K08202 MFS transporter, OCT family, solute carrier family 22 (organic cation transporter), member 4/5 | (RefSeq) organic cation/carnitine transporter 4 (A)
GLYMA_16G219500	up	up	At1g59960	K22374 3''-deamino-3''-oxonicotianamine reductase [EC:1.1.1.285] | (RefSeq) CHR2; chalcone reductase CHR2 (A)
GLYMA_17G064800	up	down	At2g35760	--
GLYMA_17G065100	up	up	At4g25810	K14504 xyloglucan:xyloglucosyl transferase TCH4 [EC:2.4.1.207] | (RefSeq) probable xyloglucan endotransglucosylase/hydrolase protein 23 (A)
GLYMA_17G075300	up	up	At2g24270	K00131 glyceraldehyde-3-phosphate dehydrogenase (NADP+) [EC:1.2.1.9] | (RefSeq) ALDH11A2; NADP-dependent glyceraldehyde-3-phosphate dehydrogenase (A)
GLYMA_17G076200	up	up	At5g61260	--
GLYMA_17G082400	up	up	--	--
GLYMA_17G092800	down	down	At4g09600	--
GLYMA_17G100800	up	up	At1g74460	--
GLYMA_17G104300	up	down	At4g02040	--
GLYMA_17G109800	up	up	At5g20270	K07297 adiponectin receptor | (RefSeq) heptahelical transmembrane protein 1 (A)
GLYMA_17G113500	up	up	At1g02630	K15014 solute carrier family 29 (equilibrative nucleoside transporter), member 1/2/3 | (RefSeq) equilibrative nucleotide transporter 8 (A)
GLYMA_17G132000	down	up	At4g11780	--
GLYMA_17G147400	up	down	At4g17030	K20628 expansin | (RefSeq) EXPB9; expansin-B3-like precursor (A)
GLYMA_17G149400	up	down	At1g77660	K15082 DNA repair protein RAD7 | (RefSeq) uncharacterized protein LOC100797833 (A)
GLYMA_17G152800	up	up	At4g18020	K14491 two-component response regulator ARR-B family | (RefSeq) two-component response regulator ARR11 isoform X2 (A)
GLYMA_17G153000	up	up	At4g18010	K24221 type I inositol polyphosphate 5-phosphatase IP5P1/2 [EC:3.1.3.56] | (RefSeq) type I inositol polyphosphate 5-phosphatase 2 (A)
GLYMA_17G187700	up	down	--	K14794 ribosomal RNA-processing protein 12 | (RefSeq) RRP12-like protein (A)
GLYMA_17G242900	up	up	At5g42870	K15728 phosphatidate phosphatase LPIN [EC:3.1.3.4] | (RefSeq) phosphatidate phosphatase PAH2 (A)
GLYMA_18G004000	up	up	At3g26560	K12818 ATP-dependent RNA helicase DHX8/PRP22 [EC:3.6.4.13] | (RefSeq) probable pre-mRNA-splicing factor ATP-dependent RNA helicase DEAH5 (A)
GLYMA_18G027100	up	up	At3g08510	K05857 phosphatidylinositol phospholipase C, delta [EC:3.1.4.11] | (RefSeq) phosphoinositide phospholipase C 2 (A)
GLYMA_18G060900	up	down	At2g30040	K20716 mitogen-activated protein kinase kinase kinase 17/18 | (RefSeq) mitogen-activated protein kinase kinase kinase 18 (A)
GLYMA_18G091600	up	down	At1g50640	K09286 EREBP-like factor | (RefSeq) ethylene-responsive transcription factor 7 (A)
GLYMA_18G095300	up	up	At3g20480	K00912 tetraacyldisaccharide 4'-kinase [EC:2.7.1.130] | (RefSeq) probable tetraacyldisaccharide 4'-kinase, mitochondrial (A)
GLYMA_18G121900	down	up	At1g26920	--
GLYMA_18G137500	up	up	At1g10550	K08235 xyloglucan:xyloglucosyl transferase [EC:2.4.1.207] | (RefSeq) probable xyloglucan endotransglucosylase/hydrolase protein 33 (A)
GLYMA_18G150000	down	down	At4g37930	K00600 glycine hydroxymethyltransferase [EC:2.1.2.1] | (RefSeq) serine hydroxymethyltransferase 5 (A)
GLYMA_18G195400	down	down	At3g54110	K15103 solute carrier family 25 (mitochondrial uncoupling protein), member 8/9 | (RefSeq) mitochondrial uncoupling protein 1 (A)
GLYMA_18G200100	up	up	At5g01520	K10664 E3 ubiquitin-protein ligase ATL6/9/15/31/42/55 [EC:2.3.2.27] | (RefSeq) E3 ubiquitin-protein ligase ATL42 (A)
GLYMA_18G210900	up	up	At2g38540	--
GLYMA_18G225400	up	down	At3g61190	--
GLYMA_18G258100	up	up	At3g49190	--
GLYMA_18G284400	up	up	At5g14090	--
GLYMA_18G289900	down	down	At2g38480	--
GLYMA_18G291700	up	up	At5g17450	K07213 copper chaperone | (RefSeq) copper chaperone homolog CCH (A)
GLYMA_18G292200	up	up	At5g38070	K10661 E3 ubiquitin-protein ligase MARCH6 [EC:2.3.2.27] | (RefSeq) probable E3 ubiquitin ligase SUD1 isoform X2 (A)
GLYMA_18G294200	up	up	At1g66850	--
GLYMA_18G294700	down	up	At5g38210	--
GLYMA_19G018700	up	down	At5g40010	K08900 mitochondrial chaperone BCS1 | (RefSeq) AAA-ATPase ASD, mitochondrial isoform X1 (A)
GLYMA_19G043000	up	down	At5g38710	K00318 proline dehydrogenase [EC:1.5.5.2] | (RefSeq) PDH; proline dehydrogenase (A)
GLYMA_19G085200	up	down	At2g26690	K08245 phytepsin [EC:3.4.23.40] | (RefSeq) putative aspartic proteinase precursor (A)
GLYMA_19G096100	up	up	At5g41040	K15400 omega-hydroxypalmitate O-feruloyl transferase [EC:2.3.1.188] | (RefSeq) omega-hydroxypalmitate O-feruloyl transferase (A)
GLYMA_19G098500	up	up	At3g02040	K18696 glycerophosphodiester phosphodiesterase [EC:3.1.4.46] | (RefSeq) glycerophosphodiester phosphodiesterase GDPD1, chloroplastic (A)
GLYMA_19G105100	up	up	At5g13930	K00660 chalcone synthase [EC:2.3.1.74] | (RefSeq) CHS13; chalcone synthase 13 (A)
GLYMA_19G128200	up	up	At1g28110	K16297 serine carboxypeptidase-like clade II [EC:3.4.16.-] | (RefSeq) serine carboxypeptidase-like 45 (A)
GLYMA_19G131100	up	up	--	--
GLYMA_19G144600	down	up	At2g42250	K23814 cytochrome P450 family 705 subfamily A [EC:1.14.-.-] | (RefSeq) cytochrome P450 705A12 (A)
GLYMA_19G158500	up	up	At2g48140	--
GLYMA_19G164300	up	up	At2g38940	K08176 MFS transporter, PHS family, inorganic phosphate transporter | (RefSeq) PHT1-7; inorganic phosphate transporter 1-7 (A)
GLYMA_19G176000	up	up	At3g53510	K05681 ATP-binding cassette, subfamily G (WHITE), member 2 | (RefSeq) ABC transporter G family member 9 (A)
GLYMA_19G188100	down	down	At2g36690	K24028 salicylic acid 3-hydroxylase [EC:1.14.11.-] | (RefSeq) protein DMR6-LIKE OXYGENASE 2 isoform X1 (A)
GLYMA_19G197800	down	down	At2g18500	--
GLYMA_19G213100	up	down	At2g47520	K09286 EREBP-like factor | (RefSeq) uncharacterized protein LOC100527371 (A)
GLYMA_19G227800	up	up	At1g56600	K18819 inositol 3-alpha-galactosyltransferase [EC:2.4.1.123] | (RefSeq) galactinol synthase 2 (A)
GLYMA_19G254300	up	up	At4g01080	K23877 xyloglucan O-acetyltransferase | (RefSeq) protein ALTERED XYLOGLUCAN 4 (A)
GLYMA_19G254800	down	up	At4g23810	K13425 WRKY transcription factor 22 | (RefSeq) WRKY transcription factor 22 (A)
GLYMA_19G264200	up	down	At5g49620	K09422 transcription factor MYB, plant | (RefSeq) MYB-like transcription factor EOBI isoform X1 (A)
GLYMA_20G007900	up	up	At1g49430	K01897 long-chain acyl-CoA synthetase [EC:6.2.1.3] | (RefSeq) long chain acyl-CoA synthetase 2 (A)
GLYMA_20G032500	up	up	At1g14040	K24195 xenotropic and polytropic retrovirus receptor 1 | (RefSeq) PHO1-H8; phosphate transporter PHO1 isoform X2 (A)
GLYMA_20G040400	up	up	At5g19410	K05681 ATP-binding cassette, subfamily G (WHITE), member 2 | (RefSeq) ABC transporter G family member 25 (A)
GLYMA_20G080000	down	down	At1g04610	K11816 indole-3-pyruvate monooxygenase [EC:1.14.13.168] | (RefSeq) probable indole-3-pyruvate monooxygenase YUCCA7 (A)
GLYMA_20G089100	down	down	At4g01630	K20628 expansin | (RefSeq) expansin-A1 isoform X1 (A)
GLYMA_20G094500	up	up	At1g56600	K18819 inositol 3-alpha-galactosyltransferase [EC:2.4.1.123] | (RefSeq) galactinol synthase 2 (A)
GLYMA_20G105300	down	down	At4g35780	K14510 serine/threonine-protein kinase CTR1 [EC:2.7.11.1] | (RefSeq) serine/threonine-protein kinase CTR1 (A)
GLYMA_20G118100	down	up	At1g68390	--
GLYMA_20G158500	up	up	At5g52300	--
GLYMA_20G196800	up	up	At2g32300	--
GLYMA_20G209700	down	up	At3g23250	K09422 transcription factor MYB, plant | (RefSeq) MYB29B2; MYB/HD-like transcription factor (A)
GLYMA_20G210800	up	down	At4g14580	K12761 carbon catabolite-derepressing protein kinase [EC:2.7.11.1] | (RefSeq) CBL-interacting serine/threonine-protein kinase 4 (A)
GLYMA_20G210900	up	up	At2g26640	K15397 3-ketoacyl-CoA synthase [EC:2.3.1.199] | (RefSeq) 3-ketoacyl-CoA synthase 11 (A)
GLYMA_20G217600	up	up	At4g24140	K13699 abhydrolase domain-containing protein 5 [EC:2.3.1.51] | (RefSeq) probable 1-acylglycerol-3-phosphate O-acyltransferase (A)
GLYMA_20G232900	up	up	At5g09420_1	K01426 amidase [EC:3.5.1.4] | (RefSeq) amidase 1 (A)
GLYMA_20G242000	up	up	At2g39350	K05681 ATP-binding cassette, subfamily G (WHITE), member 2 | (RefSeq) ABC transporter G family member 25 (A)
GLYMA_U028300	down	up	At5g01030	--
GLYMA_U043300	up	up	At1g49670_1	K09841 xanthoxin dehydrogenase [EC:1.1.1.288] | (RefSeq) xanthoxin dehydrogenase (A)
novel.1337	up	up	--	--
novel.1348	up	up	--	--
novel.1449	up	up	At3g25400	K16904 dCTP diphosphatase [EC:3.6.1.12] | (RefSeq) dCTP pyrophosphatase 1 (A)
novel.175	up	up	At2g07420	K24544 cytochrome P450 family 714 subfamily C | (RefSeq) cytochrome P450 714C2 (A)
novel.360	up	down	At5g12010	--
novel.378	down	down	At4g32720	K11090 lupus La protein | (RefSeq) la protein 1 isoform X1 (A)
novel.418	down	down	--	--
novel.543	up	up	At5g32440	--
novel.88	up	up	--	--
novel.979	up	down	At5g12010	--
