# Supplementary material for: Gma-miR408 Enhances Soybean Cyst Nematode Susceptibility by Suppressing Reactive Oxygen Species Accumulation
Source: Int J Mol Sci. 2022 Nov 14;23(22):14022. doi: 10.3390/ijms232214022 (PMC9695887; doi:10.3390/ijms232214022)
Supplement: Supplementary file 1 [file ijms-23-14022-s001.zip › Table.S9.xlsx]

## Sheet: Sheet3
Table S9 Different regulation DEGs between EV vs OE and EV vs STTM.
GeneID	EV vs OE	EV vs STTM	Annotation
GLYMA_01G036000	up	down	At1g24100	K11820 N-hydroxythioamide S-beta-glucosyltransferase [EC:2.4.1.195] | (RefSeq) UDP-glycosyltransferase 74B1 (A)
GLYMA_02G028400	up	down	--	--
GLYMA_02G036400	up	down	At1g23390	--
GLYMA_02G171300	up	down	At5g06710	K09338 homeobox-leucine zipper protein | (RefSeq) homeobox-leucine zipper protein HOX11 (A)
GLYMA_02G206300	up	down	At2g24130	K13420 LRR receptor-like serine/threonine-protein kinase FLS2 [EC:2.7.11.1] | (RefSeq) probable LRR receptor-like serine/threonine-protein kinase At3g47570 (A)
GLYMA_02G247000	up	down	At1g66480	--
GLYMA_02G261900	up	down	At2g38310	K14496 abscisic acid receptor PYR/PYL family | (RefSeq) abscisic acid receptor PYL4 (A)
GLYMA_03G022800	up	down	At1g24620	K13448 calcium-binding protein CML | (RefSeq) probable calcium-binding protein CML25 (A)
GLYMA_03G057100	up	down	At5g05600	K05277 anthocyanidin synthase [EC:1.14.20.4] | (RefSeq) ANS3; leucoanthocyanidin dioxygenase (A)
GLYMA_03G103000	up	down	At2g44600	--
GLYMA_03G226200	up	down	At3g62010	--
GLYMA_04G004500	up	down	At4g34950	--
GLYMA_04G042400	up	down	At5g24080	K13430 serine/threonine-protein kinase PBS1 [EC:2.7.11.1] | (RefSeq) probable serine/threonine-protein kinase PBL7 (A)
GLYMA_04G185400	up	down	At2g01210	--
GLYMA_05G128200	up	down	At5g46330	K13420 LRR receptor-like serine/threonine-protein kinase FLS2 [EC:2.7.11.1] | (RefSeq) LRR receptor-like serine/threonine-protein kinase FLS2 (A)
GLYMA_05G186700	up	down	At5g64750	K09286 EREBP-like factor | (RefSeq) ERF7; ethylene-responsive transcription factor 7 (A)
GLYMA_05G222400	up	down	At2g19590	K05933 aminocyclopropanecarboxylate oxidase [EC:1.14.17.4] | (RefSeq) 1-aminocyclopropane-1-carboxylate oxidase 1 (A)
GLYMA_06G004300	up	down	At4g34950	--
GLYMA_06G031000	up	down	At1g19530	--
GLYMA_06G031100	up	down	At1g19530	--
GLYMA_06G035300	up	down	At4g31940	K23136 fraxetin 5-hydroxylase [EC:1.14.14.164] | (RefSeq) xanthotoxin 5-hydroxylase CYP82C4 (A)
GLYMA_06G051500	up	down	At5g11790	K18266 protein NDRG1 | (RefSeq) uncharacterized protein LOC100803300 (A)
GLYMA_06G148400	up	down	At5g64750	K09286 EREBP-like factor | (RefSeq) ERF5; ethylene-responsive transcription factor RAP2-3-like (A)
GLYMA_06G290200	up	down	At2g20630	K17506 protein phosphatase 1L [EC:3.1.3.16] | (RefSeq) probable protein phosphatase 2C 58 (A)
GLYMA_06G293400	up	down	At4g03510	K10666 E3 ubiquitin-protein ligase RNF5 [EC:2.3.2.27] | (RefSeq) uncharacterized protein LOC100786373 (A)
GLYMA_06G294400	up	down	At4g14400	K15503 serine/threonine-protein phosphatase 6 regulatory ankyrin repeat subunit B | (RefSeq) protein ACCELERATED CELL DEATH 6 (A)
GLYMA_07G071300	up	down	At4g00520	K01068 acyl-coenzyme A thioesterase 1/2/4 [EC:3.1.2.2] | (RefSeq) acyl-CoA thioesterase 2 isoform X2 (A)
GLYMA_07G104300	up	down	At1g67920	--
GLYMA_07G125600	up	down	At5g56550	--
GLYMA_07G195300	up	down	At4g27450	--
GLYMA_07G208700	up	down	At2g15890	--
GLYMA_08G010400	up	down	At5g50760	K14488 SAUR family protein | (RefSeq) auxin-responsive protein SAUR71 (A)
GLYMA_08G032800	up	down	At5g56550	--
GLYMA_08G083300	up	down	At5g46330	K13420 LRR receptor-like serine/threonine-protein kinase FLS2 [EC:2.7.11.1] | (RefSeq) LRR receptor-like serine/threonine-protein kinase FLS2 (A)
GLYMA_08G145300	up	down	At5g64750	K09286 EREBP-like factor | (RefSeq) APETALA2/ethylene responsive factor-like protein (A)
GLYMA_08G170400	up	down	At3g12920	K19042 E3 ubiquitin-protein ligase BOI and related proteins [EC:2.3.2.27] | (RefSeq) probable BOI-related E3 ubiquitin-protein ligase 3 (A)
GLYMA_08G212900	up	down	At3g15850	K20416 palmitoyl-[glycerolipid] 7-desaturase [EC:1.14.19.42] | (RefSeq) FAD5.2; delta-7 desaturase (A)
GLYMA_08G355200	up	down	At5g24080	K13415 protein brassinosteroid insensitive 1 [EC:2.7.10.1 2.7.11.1] | (RefSeq) BRI1B; brassinosteroid receptor precursor (A)
GLYMA_09G129100	up	down	At5g52830	K13425 WRKY transcription factor 22 | (RefSeq) probable WRKY transcription factor 27 (A)
GLYMA_09G145700	up	down	At3g61060	--
GLYMA_10G081900	up	down	At2g35930	--
GLYMA_10G195700	up	down	At1g73080	K20718 LRR receptor-like serine/threonine-protein kinase ERECTA [EC:2.7.11.1] | (RefSeq) LRR receptor-like serine/threonine-protein kinase ERECTA (A)
GLYMA_10G239300	up	down	At1g63040	K09286 EREBP-like factor | (RefSeq) AP2-2; AP2 domain-containing transcription factor 2 (A)
GLYMA_11G014800	up	down	At1g71520	K09286 EREBP-like factor | (RefSeq) ethylene-responsive transcription factor ERF010 (A)
GLYMA_11G143300	up	down	At2g28690	--
GLYMA_12G031300	up	down	At4g34950	--
GLYMA_12G054000	up	down	At2g44480	K01188 beta-glucosidase [EC:3.2.1.21] | (RefSeq) cyanogenic beta-glucosidase (A)
GLYMA_12G192600	up	down	At5g42570	K14009 B-cell receptor-associated protein 31 | (RefSeq) B-cell receptor-associated protein 31 (A)
GLYMA_12G201000	up	down	At4g28240	--
GLYMA_12G205600	up	down	--	--
GLYMA_12G205700	up	down	At1g03790	K23047 E3 ubiquitin-protein ligase UNKL [EC:2.3.2.27] | (RefSeq) zinc finger CCCH domain-containing protein 2 (A)
GLYMA_13G035100	up	down	At1g21550	K13448 calcium-binding protein CML | (RefSeq) probable calcium-binding protein CML44 (A)
GLYMA_13G039800	up	down	At1g21320_1	K20725 MAP kinase substrate 1 | (RefSeq) nuclear speckle RNA-binding protein B (A)
GLYMA_13G176400	up	down	CE01921	K08770 ubiquitin C | (RefSeq) polyubiquitin 3 (A)
GLYMA_13G222100	up	down	At1g17020	K05278 flavonol synthase [EC:1.14.20.6] | (RefSeq) flavonol synthase/flavanone 3-hydroxylase (A)
GLYMA_13G259500	up	down	At1g78440	K04125 gibberellin 2beta-dioxygenase [EC:1.14.11.13] | (RefSeq) GA2OX7; gibberellin 2-beta-dioxygenase 1 (A)
GLYMA_13G296800	up	down	At4g28310	--
GLYMA_13G360600	up	down	At1g80440	--
GLYMA_14G016000	up	down	At5g48150	K14494 DELLA protein | (RefSeq) DELLA protein 1 (A)
GLYMA_14G039800	up	down	--	--
GLYMA_14G069200	up	down	At1g66480	--
GLYMA_14G175400	up	down	At1g22360	K13691 pathogen-inducible salicylic acid glucosyltransferase [EC:2.4.1.-] | (RefSeq) UDP-glycosyltransferase 74G1 (A)
GLYMA_14G185100	up	down	At5g65640	K13422 transcription factor MYC2 | (RefSeq) transcription factor MYC1 (A)
GLYMA_15G082400	up	down	At2g34140	--
GLYMA_15G093900	up	down	At1g30040	K04125 gibberellin 2beta-dioxygenase [EC:1.14.11.13] | (RefSeq) GA2OX8; gibberellin 2-beta-dioxygenase 8 (A)
GLYMA_15G098100	up	down	At5g18670	K01177 beta-amylase [EC:3.2.1.2] | (RefSeq) beta-amylase 1, chloroplastic (A)
GLYMA_15G126400	up	down	At4g19700	K19042 E3 ubiquitin-protein ligase BOI and related proteins [EC:2.3.2.27] | (RefSeq) BOI-related E3 ubiquitin-protein ligase 1 (A)
GLYMA_15G232400	up	down	At5g17680	--
GLYMA_16G148600	up	down	At3g26690	K07766 diphosphoinositol-polyphosphate diphosphatase [EC:3.6.1.52] | (RefSeq) nudix hydrolase 12, mitochondrial (A)
GLYMA_17G064800	up	down	At2g35760	--
GLYMA_17G104300	up	down	At4g02040	--
GLYMA_17G147400	up	down	At4g17030	K20628 expansin | (RefSeq) EXPB9; expansin-B3-like precursor (A)
GLYMA_17G149400	up	down	At1g77660	K15082 DNA repair protein RAD7 | (RefSeq) uncharacterized protein LOC100797833 (A)
GLYMA_17G187700	up	down	--	K14794 ribosomal RNA-processing protein 12 | (RefSeq) RRP12-like protein (A)
GLYMA_18G060900	up	down	At2g30040	K20716 mitogen-activated protein kinase kinase kinase 17/18 | (RefSeq) mitogen-activated protein kinase kinase kinase 18 (A)
GLYMA_18G091600	up	down	At1g50640	K09286 EREBP-like factor | (RefSeq) ethylene-responsive transcription factor 7 (A)
GLYMA_18G225400	up	down	At3g61190	--
GLYMA_19G018700	up	down	At5g40010	K08900 mitochondrial chaperone BCS1 | (RefSeq) AAA-ATPase ASD, mitochondrial isoform X1 (A)
GLYMA_19G043000	up	down	At5g38710	K00318 proline dehydrogenase [EC:1.5.5.2] | (RefSeq) PDH; proline dehydrogenase (A)
GLYMA_19G085200	up	down	At2g26690	K08245 phytepsin [EC:3.4.23.40] | (RefSeq) putative aspartic proteinase precursor (A)
GLYMA_19G213100	up	down	At2g47520	K09286 EREBP-like factor | (RefSeq) uncharacterized protein LOC100527371 (A)
GLYMA_19G264200	up	down	At5g49620	K09422 transcription factor MYB, plant | (RefSeq) MYB-like transcription factor EOBI isoform X1 (A)
GLYMA_20G210800	up	down	At4g14580	K12761 carbon catabolite-derepressing protein kinase [EC:2.7.11.1] | (RefSeq) CBL-interacting serine/threonine-protein kinase 4 (A)
novel.360	up	down	At5g12010	--
novel.979	up	down	At5g12010	--
GLYMA_02G089400	down	up	--	--
GLYMA_02G125900	down	up	--	--
GLYMA_03G016400	down	up	--	--
GLYMA_03G106000	down	up	At3g50310	K20716 mitogen-activated protein kinase kinase kinase 17/18 | (RefSeq) mitogen-activated protein kinase kinase kinase 18 (A)
GLYMA_05G202300	down	up	At5g13180	--
GLYMA_05G211700	down	up	At4g11280	K20772 1-aminocyclopropane-1-carboxylate synthase 1/2/6 [EC:4.4.1.14] | (RefSeq) ACS1; 1-aminocyclopropane-1-carboxylate synthase (A)
GLYMA_05G215900	down	up	At4g23810	K13425 WRKY transcription factor 22 | (RefSeq) WRKY transcription factor 22 (A)
GLYMA_05G234600	down	up	At1g68320	K09422 transcription factor MYB, plant | (RefSeq) MYB84; MYB transcription factor MYB84 (A)
GLYMA_06G129800	down	up	At5g53030	--
GLYMA_08G009700	down	up	At5g13180	--
GLYMA_09G005300	down	up	At4g04480	--
GLYMA_09G056600	down	up	At4g30180	--
GLYMA_10G234700	down	up	At5g52400	K20661 cytochrome P450 family 714 subfamily A1 | (RefSeq) LOW QUALITY PROTEIN: cytochrome P450 714A1-like (A)
GLYMA_10G272000	down	up	At1g68390	--
GLYMA_11G096600	down	up	At2g17040	--
GLYMA_11G129600	down	up	At2g44480	K01188 beta-glucosidase [EC:3.2.1.21] | (RefSeq) cyanogenic beta-glucosidase (A)
GLYMA_11G129700	down	up	At2g44450	K01188 beta-glucosidase [EC:3.2.1.21] | (RefSeq) cyanogenic beta-glucosidase (A)
GLYMA_11G129800	down	up	At2g44450	K01188 beta-glucosidase [EC:3.2.1.21] | (RefSeq) cyanogenic beta-glucosidase (A)
GLYMA_12G102300	down	up	At3g22104	--
GLYMA_12G217500	down	up	At4g27280	K24345 calcium-binding protein KIC and related proteins | (RefSeq) calcium-binding EF-hand family protein (A)
GLYMA_13G133000	down	up	At2g28200	--
GLYMA_14G130800	down	up	At5g11460	--
GLYMA_15G109900	down	up	At4g04480	--
GLYMA_16G204700	down	up	At1g12380	--
GLYMA_17G132000	down	up	At4g11780	--
GLYMA_18G121900	down	up	At1g26920	--
GLYMA_18G294700	down	up	At5g38210	--
GLYMA_19G144600	down	up	At2g42250	K23814 cytochrome P450 family 705 subfamily A [EC:1.14.-.-] | (RefSeq) cytochrome P450 705A12 (A)
GLYMA_19G254800	down	up	At4g23810	K13425 WRKY transcription factor 22 | (RefSeq) WRKY transcription factor 22 (A)
GLYMA_20G118100	down	up	At1g68390	--
GLYMA_20G209700	down	up	At3g23250	K09422 transcription factor MYB, plant | (RefSeq) MYB29B2; MYB/HD-like transcription factor (A)
GLYMA_U028300	down	up	At5g01030	--
